# Supplementary material
Source: PubMed Central journal article supplement (PMC3932450)
Supplement: amiajnl-2012-001506-s1.pdf [file amiajnl-2012-001506-s1.pdf]

SF|LF|MetaMap CUI|CSI|Ratio in CSI|UMLS CUI|UMLS SOURCE|ADAM|Ratio in ADAM|Dictionary  
5-FU|2,4(1H,3H)-Pyrimidinedione, 5-fluoro-|||C0016360|MSH;NDFRT|||  
5-FU|2,4-Dioxo-5-fluoropyrimidine|||C0016360|NCI;PDQ|||  
5-FU|5 Fluorouracil|C0016360|||C0016360|MSH|||  
5-FU|5 fluorouracil|C0016360|||C0016360|CHV|||  
5-FU|5 fu|C0016360|||C0016360|CHV|||  
5-FU|5-FU|C0016360|||C0016360|MSH;NCI;NDFRT;PDQ;SNOMEDCT|||  
5-FU|5-Fluoro-2,4(1H, 3H)-pyrimidinedione|||C0016360|NCI|||  
5-FU|5-Fluoro-2,4(1H,3H)-pyrimidinedione|||C0016360|NCI;PDQ|||  
5-FU|5-Fluorouracil|C0016360|||C0016360|MSH;NCI;NDFRT;SNOMEDCT|||  
5-FU|5-Fluracil|C0016360|||C0016360|NCI;PDQ|||  
5-FU|5-Fu|C0016360|||C0016360|NCI|||  
5-FU|5-flourouracil|||1|0.0018|  
5-FU|5-fluoro-uracil|||1|0.0024|  
5-FU|5-fluorouracil|C0016360|1|1.000|C0016360|CHV;NCI;PDQ|1|0.9012|  
5-FU|5-fu|C0016360|||C0016360|CHV|||  
5-FU|5FU|C0016360|||C0016360|CSP;MSH;NDFRT;PDQ|||  
5-FU|5FU - Fluorouracil|C0016360|||C0016360|SNOMEDCT|||  
5-FU|5Fluracil|C0016360|||C0016360|PDQ|||  
5-FU|5fluorouracil|C0016360|||C0016360|PDQ|||  
5-FU|FLUOROURACIL|C0016360|||C0016360|MTHSPL;NCI;NDFRT;VANDF|||  
5-FU|FU|C0016360;C1424823|||C0016360|PDQ|||  
5-FU|Fluoro Uracil|C0016360|||C0016360|NCI;PDQ|||  
5-  
FU|Fluorouracil|C0016360|||C0016360|LCH;LNC;MSH;MTH;MTHSPL;NCI;NDFRT;RXNORM;SNOMEDCT;USPMG|||  
5-FU|Fluorouracil (product)|||C0016360|SNOMEDCT|||  
5-FU|Fluorouracil (substance)|||C0016360|SNOMEDCT|||  
5-FU|Fluorouracil [Chemical/Ingredient)|||C0016360|NDFRT|||  
5-FU|Fluoruracil|C0016360|||C0016360|MSH;NDFRT|||  
5-FU|Fluouracil|C0016360|||C0016360|NCI;PDQ|||  
5-FU|chemotherapy|C0013216;C0013217;C0392920|||1|0.0024|  
5-FU|fluorouracil|C0016360|||C0016360|CHV;CSP;MTHSPL;NCI;PDQ|1|0.0923|  
6-MP|1,7-Dihydro-6H-purine-6-thione|||C0000618|MSH;NCI;NDFRT;PDQ|||  
6-MP|1,7-Dihydro-6H-purine-6-thione Monohydrate|||C0000618|NCI;PDQ|||  
6-MP|3H-Purine-6-thiol|C0000618|||C0000618|NCI;PDQ|||  
6-MP|6 MP|C0000618|||C0000618|NCI|||  
6-MP|6 Mercaptopurine|C0000618|||C0000618|MSH|||  
6-MP|6 Thiohypoxanthine|C0000618|||C0000618|MSH;NCI;PDQ|||  
6-MP|6 Thiopurine|C0000618|||C0000618|MSH;NCI;PDQ|||  
6-MP|6 mercaptopurine|C0000618|||C0000618|CHV;CSP|||  
6-MP|6 thiopurine|C0000618|||C0000618|CSP|||  
6-MP|6-MP|C0000618|||C0000618|NCI;PDQ;SNOMEDCT|||  
6-MP|6-Mercaptopurine|C0000618|||C0000618|MSH;NCI;NDFRT;SNOMEDCT|||  
6-MP|6-Mercaptopurine [Chemical/Ingredient)|||C0000618|NDFRT|||  
6-MP|6-Purinethiol|C0000618|||C0000618|NCI;PDQ|||  
6-MP|6-Thiohypoxanthine|C0000618|||C0000618|MSH;NDFRT|||  
6-MP|6-Thiopurine|C0000618|||C0000618|MSH;NCI;NDFRT;PDQ|||  
6-MP|6-Thioxopurine|C0000618|||C0000618|NCI;PDQ|||  
6-MP|6-  
mercaptapurine|C0000618|1|1.000|C0000618|CHV;MSH;NCI;NDFRT;PDQ;SNOMEDCT|1|0.9549|  
|  
6-MP|6-mp|C0000618|||C0000618|CHV|||  
6-MP|6-thiopurine|C0000618|||C0000618|CHV|||  
6-MP|6H-Purine-6-thione, 1,7-dihydro-|||C0000618|MSH;NDFRT|||  
6-MP|6H-Purine-6-thione, 1,7-dihydro- (9CI)|||C0000618|NCI;PDQ|||

6-MP|6MP|C0000618|||C0000618|PDQ|||  
6-MP|6MP - Mercaptopurine|C0000618|||C0000618|SNOMEDCT|||  
6-MP|7-Mercapto-1,3,4,6-tetrazaindene|||C0000618|NCI;PDQ|||  
6-MP|MERCAPTOPURINE|C0000618|||C0000618|MTHSPL;NCI;NDFRT;VANDF|||  
6-MP|MERCAPTOPURINE A 06|||C0000618|MSH|||  
6-MP|MP|||C0000618|PDQ|||  
6-MP|Mercapto-6-purine|C0000618|||C0000618|NCI;PDQ|||  
6-MP|Mercaptopurine|C0000618|||C0000618|LNC;MSH;NCI;NDFRT;SNOMEDCT;USPMG|||  
6-MP|Mercaptopurine (product)|||C0000618|SNOMEDCT|||  
6-MP|Mercaptopurine (substance)|||C0000618|SNOMEDCT|||  
6-MP|Mercapurin|C0000618|||C0000618|NCI;PDQ|||  
6-MP|Mern|C0000618|||C0000618|NCI;PDQ|||  
6-MP|Purine, 6-mercapto-|C0000618|||C0000618|NCI|||  
6-MP|Purine-6-thiol (8CI)|||C0000618|NCI;PDQ|||  
6-MP|mercaptopurine|C0000618|||C0000618|CHV;MTH;MTHSPL;NCI;PDQ;RXNORM|1|0.0451|  
AAA|A4|||C1705543|NCI|||  
AAA|AAA|||C0162871;C0271742;C0611285;C1364818;C1705543|MEDLINEPLUS;NCI;OMIM|||  
AAA|AAA - Abdominal aortic aneurysm|C0162871|||C0162871|SNOMEDCT|||  
AAA|ABDOMINAL AORTIC ANEURYSM|C0162871;C2926614|||C0162871|OMIM|||  
AAA|ABETA|C1420510;C1705543|||C1705543|NCI|||  
AAA|ABPP|C0054150;C0611285|||C0611285|NCI|||  
AAA|ACHALASIA-ADDISONIANISM-ALACRIMA SYNDROME|C0271742|||C0271742|OMIM|||  
AAA|ACTH resistant adrenal insufficiency, achalasia and alacrima|||C0271742|MSH|||  
AAA|ACTH-RESISTANT ADRENAL INSUFFICIENCY, ACHALASIA AND ALACRIMA|||C0271742|OMIM|||  
AAA|AD1|||C1705543|NCI|||  
AAA|ADDISONIAN-ACHALASIA SYNDROME|C0271742|||C0271742|OMIM|||  
AAA|ALACRIMA-ACHALASIA-ADDISONIANISM|C0271742|||C0271742|OMIM|||  
AAA|ALACRIMA-ACHALASIA-ADRENAL INSUFFICIENCY NEUROLOGIC DISORDER|C0271742|||C0271742|OMIM|||  
AAA|ALLGROVE SYNDROME|C0271742|||C0271742|OMIM|||  
AAA|AMYLOID BETA A4 PRECURSOR PROTEIN|C1364818|||C1364818|OMIM|||  
AAA|AMYLOID OF AGING AND ALZHEIMER DISEASE|||C1364818|OMIM|||  
AAA|ANEURYSM, ABDOMINAL AORTIC|C0162871;C2926614|||C0162871|OMIM|||  
AAA|ANEURYSM, AORTA, ABDOMINAL|C0162871|||C0162871|DXP|||  
AAA|APP|||C0611285;C1364818|HUGO;NCI;OMIM|||  
AAA|APP Gene|C1364818|||C1364818|NCI|||  
AAA|APP gene|C1364818|||C1364818|HUGO;MTH|||  
AAA|APP protein, human|C0611285|||C0611285|MSH;MTH|||  
AAA|APP wt Allele|C1705543|||C1705543|MTH;NCI|||  
AAA|APPI|C0611285|||C0611285|NCI|||  
AAA|Abdominal Aortic Aneurysm|C0162871;C2926614|||C0162871|COSTAR;MEDLINEPLUS;MSH;NCI;NDFRT|||  
AAA|Abdominal Aortic Aneurysms|C0162871|||C0162871|MSH|||  
AAA|Abdominal aortic aneurysm|C0162871;C2926614|||C0162871|SNOMEDCT|||  
AAA|Abdominal aortic aneurysm (disorder)|||C0162871|SNOMEDCT|||  
AAA|Achalasia Addisonianism Alacrimia syndrome|C0271742|||C0271742|MSH|||  
AAA|Achalasia-addisonian syndrome|C0271742|||C0271742|SNOMEDCT|||  
AAA|Addisonian achalasia syndrome|C0271742|||C0271742|MSH|||  
AAA|Alacrima-Achalasia-Addisonianism|C0271742|||C0271742|MSH|||  
AAA|Alacrima-achalasia-adrenal insufficiency neurologic disorder|C0271742|||C0271742|MSH|||  
AAA|Alacrimia-achalasia-addisonianism|C0271742|||C0271742|SNOMEDCT|||  
AAA|Aleuria aurantia agglutinin|||1|0.0034|  
AAA|Allgrove Syndrome|C0271742|||C0271742|NCI|||  
AAA|Allgrove syndrome|C0271742|||C0271742|MSH;SNOMEDCT|||

AAA|Alzheimer Disease 1 Protein|C0611285|||C0611285|NCI|||  
AAA|Alzheimer's Disease Amyloid Protein|C0611285|||C0611285|NCI|||  
AAA|Amyloid|C0002716;C0011560;C0611285|||C0611285|NCI|||  
AAA|Amyloid Beta (A4) Precursor Protein|C1364818|||C0611285|NCI|||  
AAA|Amyloid Beta (A4) Precursor Protein (Protease Nexin-II, Alzheimer Disease) Gene|||C1364818|NCI|||  
AAA|Amyloid Beta (A4) Precursor Protein (Protease Nexin-II, Alzheimer Disease) wt Allele|||C1705543|NCI|||  
AAA|Amyloid Beta A4 Protein Precursor|C0611285|||C0611285|NCI|||  
AAA|Amyloid Beta-Peptide|C0078939;C0611285|||C0611285|NCI|||  
AAA|Amyloid of Aging and Alzheimer Disease Protein|||C0611285|NCI|||  
AAA|Aneurysm, Abdominal Aortic|C0162871;C2926614|||C0162871|MSH|||  
AAA|Aneurysms, Abdominal Aortic|C0162871|||C0162871|MSH|||  
AAA|Anguilla anguilla agglutinin|||1|0.0046|  
AAA|Aortic Aneurysm, Abdominal|C0162871;C2926614|||C0162871|MSH;MTH;NDFRT|||  
AAA|Aortic Aneurysm, Abdominal [Disease/Finding]|||C0162871|NDFRT|||  
AAA|Aortic Aneurysms, Abdominal|C0162871|||C0162871|MSH|||  
AAA|CEREBRAL VASCULAR AMYLOID PEPTIDE|C1364818|||C1364818|OMIM|||  
AAA|CVAP|||C0611285;C1364818;C1705543|NCI;OMIM|||  
AAA|Cerebralvascular Amyloid Peptide|C0611285|||C0611285|NCI|||  
AAA|DEMENTIA, EARLY-ONSET PROGRESSIVE, AUTOSOMAL RECESSIVE|C1364818|||C1364818|OMIM|||  
AAA|GLUCOCORTICOID DEFICIENCY AND ACHALASIA|||C0271742|OMIM|||  
AAA|Glucocorticoid deficiency and achalasia|||C0271742|MSH|||  
AAA|Glucocorticoid deficiency with achalasia|C0271742|||C0271742|MTH;SNOMEDCT|||  
AAA|Glucocorticoid deficiency with achalasia (disorder)|||C0271742|SNOMEDCT|||  
AAA|HYPOADRENALISM WITH ACHALASIA|C0271742|||C0271742|OMIM|||  
AAA|Hypoadrenalism with achalasia|C0271742|||C0271742|MSH|||  
AAA|PN II|C0611285|||C0611285|NCI|||  
AAA|PN-II|C0611285|||C0611285|NCI|||  
AAA|PN2|C0332398;C0611285;C1364818|||C0611285;C1364818|NCI;OMIM|||  
AAA|PROTEASE NEXIN II|C0085151;C0611285;C1364818|||C1364818|OMIM|||  
AAA|PreA4|C0611285|||C0611285|NCI|||  
AAA|Protease Nexin II|C0085151;C0611285;C1364818|||C0611285|NCI|||  
AAA|Protease Nexin-II, Alzheimer Disease|C0611285|||C0611285|NCI|||  
AAA|TRIPLE-A SYNDROME|C0271742|||C0271742|OMIM|||  
AAA|Triple A syndrome|C0271742|||C0271742|MSH;SNOMEDCT|||  
AAA|abdominal Aorta|C0003484;C1269882|||1|0.0189|  
AAA|abdominal aneurysm|C0162871|||C0162871|CHV|||  
AAA|abdominal aneurysms|C0162871|||C0162871|CHV|||  
AAA|abdominal aorta aneurysm|C0162871|||C0162871|CHV|||  
AAA|abdominal aortic aneurysm|C0162871;C2926614|1|0.998|C0162871;C2926614|CHV;COSTAR;LNC;MEDLINEPLUS;MSH;NCI;NDFRT;OMIM;SNOMEDCT|1|0.93|1  
AAA|abdominal aortic aneurysm (AAA)|C0162871;C2926614|||C0162871|CHV|||  
AAA|abdominal aortic aneurysm repair|C0741152|||1|0.004|  
AAA|abdominal aortic aneurysmectomy|||1|  
AAA|abdominal aortic aneurysms|C0162871|||C0162871|CHV|||  
AAA|achalasia-addisonism-alacrimia|||1|  
AAA|acne-associated arthritis|||1|  
AAA|acquired aplastic anemia|C0271907|1|0.002|C0271907|SNOMEDCT|||1  
AAA|acute anxiety attack|||1|  
AAA|acute apical abscess|C1290646|||C1290646|SNOMEDCT|||  
AAA|addiction, autoimmune diseases, aging|||1|  
AAA|allgrove syndrome|C0271742|||C0271742|CHV|||  
AAA|allgroves syndrome|||C0271742|CHV|||  
AAA|alpha-aminoadipic acid|C0000257|||C0000257|MSH;NDFRT;SNOMEDCT|||

AAA|amalgam|C0440138;C0580619|||||1  
AAA|amino acid analysis|||||1  
AAA|amyloid beta (A4) precursor protein|C1364818|||C1364818|HUGO|||  
AAA|amyloid beta (A4) precursor protein (protease nexin-II, Alzheimer disease) protein, human|||C0611285|MSH|||  
AAA|androgenic anabolic agent|||||1  
AAA|aneurysm abdominal|||C0162871|CHV|||  
AAA|aneurysm of ascending aorta|C0856747|||C0856747|CHV;SNOMEDCT|||1  
AAA|angiography of abdominal aorta|||||1  
AAA|anti-actin antibody|C0369998|||C0369998|SNOMEDCT|||  
AAA|anti-albumin antibodies|||||1|0.0029|  
AAA|antigen-extracted allogenic|||||1  
AAA|aromatic amino acid|C0301713|||C0301713|CHV;MSH;SNOMEDCT|||1  
AAA|aromatic amino acids|C0301713|||||1|0.0201|  
AAA|arrest after arrival|||||1  
AAA|arthroscopy, arthroscopy, arthrotomy|||||1  
AAA|aryl acylamidase|C0052439|||C0052439|MSH;SNOMEDCT|||  
AAA|autoantibodies|C0004358|||||1|0.0052|  
AAA|autolyzed antigen-extracted allogeneic|||||1|0.0029|  
AAA|autolyzed, antigen-extracted, allogenic|||||1  
AAA|cellular activities|||||1|0.008|  
AAA|peptidase nexin-II|C1364818|||C1364818|HUGO|||  
AAA|peptidase nexin-II, human|C0611285|||C0611285|MSH|||  
AAA|protease nexin 2, human|C0611285|||C0611285|MSH|||  
AAA|triple a syndrome|C0271742|||C0271742|CHV|||  
ABG|A1B|||C1412045|OMIM|||  
ABG|A1BG|C1412045|||C1412045|HUGO;OMIM|||  
ABG|A1BG gene|C1412045|||C1412045|HUGO;MTH|||  
ABG|ABG|C0150411;C1412045|||C0150411;C1412045|NCI;OMIM|||  
ABG|ABG - Arterial blood gas analysis|C0150411|||C0150411|SNOMEDCT|||  
ABG|ABGs measurement|C0150411|||C0150411|SNOMEDCT|||  
ABG|ALPHA-1-B-GLYCOPROTEIN|C1412045|||C1412045|OMIM|||  
ABG|Analysis of arterial blood gas (oxygen saturation, pO2, pCO2, CO2, pH); rest only|||C0150411|MTH|||  
ABG|Analysis of arterial blood gases and pH|C0150411|||C0150411|MTH;SNOMEDCT|||  
ABG|Analysis of arterial blood gases and pH (procedure)|||C0150411|SNOMEDCT|||  
ABG|Arterial Blood Gas Measurement|C0150411|||C0150411|NCI|||  
ABG|Arterial bld gas measure|||C0150411|ICD9CM|||  
ABG|Arterial blood gas analysis|C0150411|||C0150411|SNOMEDCT|||  
ABG|Arterial blood gas analysis (procedure)|||C0150411|SNOMEDCT|||  
ABG|Arterial blood gases|C0150411|||C0150411|CCS;SNOMEDCT|||  
ABG|Atrophic body gastritis|||||1|0.0604|  
ABG|Blood Gas Analysis|C0005800;C0150411|||C0150411|NCI|||  
ABG|Blood Gas Measurement|C0005800;C0150411|||C0150411|NCI|||  
ABG|Blood gases, arterial measurement|C0150411|||C0150411|SNOMEDCT|||  
ABG|Blood gases, arterial measurement (procedure)|||C0150411|SNOMEDCT|||  
ABG|GAB|C0016910;C1412045|||C1412045|OMIM|||  
ABG|Gases, arterial measurement|C0150411|||C0150411|SNOMEDCT|||  
ABG|Measurement of systemic arterial blood gases|C0150411|||C0150411|ICD9CM|||  
ABG|air-bone gap|||||1|0.1374|1  
ABG|alpha-1-B glycoprotein|C1412045|||C1412045|HUGO|||  
ABG|analysis arterial blood gas|C0150411|||C0150411|CHV|||  
ABG|aortoiliac bypass graft|||||1  
ABG|arterial blood gas|C0150411|1|1.000|C0150411|CHV|1|0.544|1  
ABG|arterial blood gas analysis|C0150411|||C0150411|CHV|||  
ABG|arterial blood gase|C0150411|||C0150411|CHV|||  
ABG|arterial blood gases|C0150411|||C0150411|CHV|1|0.2582|

ABG|axiobuccogingival|||||1  
ABG|blood gas arterial||||C0150411|CHV||  
AB|AB||||C0000769;C0580927;C1705545;C2700382|MSH;NCI;SNOMEDCT||  
AB|AB - Zebrafish|C2700382|||C2700382|MTH||  
AB|AB Term Type|C1705545|||C1705545|MTH;NCI||  
AB|AB Zebrafish|C2700382|||C2700382|NCI||  
AB|AB hearing assessment list|C0580927|||C0580927|MTH;SNOMEDCT||  
AB|AB hearing assessment list (physical object)|||C0580927|SNOMEDCT||  
AB|ABNORM||||C0000769|MSH||  
AB|Ab||||C0003241|LNC;NCI||  
AB|Ace bandage|C0336591|||||1  
AB|Alcian blue|C0001933|||||1|0.0444|1  
AB|Antibodies|C0003241|||C0003241|LNC;MSH;MTH;NCI;NDFRT||  
AB|Antibodies [Chemical/Ingredient]||||C0003241|NDFRT||  
AB|Antibody|C0003241;C0021027|||C0003241|LNC;NCI;SNOMEDCT;UWDA||  
AB|Antibody (substance)|||C0003241|SNOMEDCT||  
AB|Antibody, NOS|C0003241;C0021027|||C0003241|SNOMEDCT||  
AB|Autologous blood|||||1|0.0112|  
AB|Little NOS Ab|C0003241|||C0003241|LNC||  
AB|Little not otherwise specified Antibody|C0003241|||C0003241|LNC||  
AB|NOS AB|C0003241|||C0003241|LNC||  
AB|NOS Ab|C0003241|||C0003241|LNC||  
AB|Unidentified Ab|C0003241|||C0003241|LNC||  
AB|Unidentified Antibody|C0003241|||C0003241|LNC||  
AB|X-ray finding|||1|0.002|||  
AB|abdomen|C0000726;C0230168;C1281594|||C0000726;C0230168;C1281594|AOD;CHV;CSP;C  
ST;FMA;HL7V2.5;LCH;LNC;MSH;MTH;NCI;OMIM;SNOMEDCT;UWDA||  
AB|abdominal|C0000726|||C0000726|CHV;LNC;NCI;SNOMEDCT|||1  
AB|able-bodied|||||1|0.0264|  
AB|abnormal|C0205161;C2347472;C2699333|||||1  
AB|abnormalities|C0000768;C0000769|||C0000769|MSH||  
AB|abnormality|C1704258|||||1  
AB|abortion|C0156543;C0392535|1|0.690|C0156543;C0392535;C1548806|AOD;CHV;COSTAR;  
CSP;CST;HL7V2.5;LCH;MEDLINEPLUS;NCI;SNOMEDCT|||1  
AB|abortus|C0000781;C1281512;C2004086|||||1  
AB|active bilaterally|||||1  
AB|acute bronchitis|C0149514|||||1|0.0045|  
AB|aid to the blind|C0001844|||||1  
AB|air bleed|||||1  
AB|air-bone|||||1  
AB|amobarbital|C0002640|||||1|0.0051|  
AB|amphotericin B|C0002679|||||1|0.0163|  
AB|ankle-brachial|||1|0.002|||1  
AB|anomalies|C0000769|||C0000769|MSH||  
AB|anterior basal|||||1  
AB|anterior burster|||||1|0.0163|  
AB|antibiotic|C0003232|||C0003232|CHV;CSP;NCI;PDQ;SNOMEDCT|1|0.014|1  
AB|antibiotics|C0003232|||C0003232|AOD;CHV;LCH;LNC;MEDLINEPLUS;MSH;MTH;NCI||  
AB|antibodi||||C0003241|CHV||  
AB|antibodied|||C0003241|CHV||  
AB|antibodies|C0003241|||C0003241|AOD;CHV;LNC;MSH;MTH;NCI;NDFRT||  
AB|antibodis|||C0003241|CHV||  
AB|antibody|C0003241;C0021027|||C0003241;C0021027;C1621287|CHV;CSP;FMA;GO;LNC;NC  
I;SNOMEDCT;UWDA|1|0.7669|1  
AB|antibodys|||C0003241|CHV||  
AB|antigen binding|C1148575|||C1148575|GO;MTH;NCI|||1  
AB|antipyrine benzocaine|C1445655|1|0.002|||1

AB|aortic banding|||||1|0.0056|  
AB|apex beat|C0277909|||||1|  
AB|apical-to-basolateral|||||1|0.0073|  
AB|apnea and bradycardia|||||1|  
AB|armboard|||||1|  
AB|arsenobetaine|C0052420|||||1|0.0051|  
AB|arterial blood|C0229665;C1550611;C2335890|1|0.002|||||  
AB|artium baccalaureus|C1549948|||C1549948|NCI|||  
AB|asbestos bodies|C0333598|||C0333598|SNOMEDCT|1|0.0247|  
AB|asbestos body|C0333598|||C0333598|NCI|||1|  
AB|asthmatic bronchitis|C1319018|||C1319018|CHV;MTH;SNOMEDCT||||1|  
AB|attentional blink|C1955945|||C1955945|MSH|1|0.0298|1|  
AB|autoantibodies|C0004358|||||1|0.0118|  
AB|autogenous bone|||||1|0.0034|  
AB|autonomic blockade|||||1|0.0073|  
AB|axiobuccal|||||1|  
AB|azure B|C0052827|||||1|  
AB|blood group in ABO system||1|0.274|||||1|  
AB|not otherwise specified AB|C0003241|||C0003241|LNC|||  
AB|not otherwise specified Antibody|C0003241|||C0003241|LNC|||  
AB|teratologic|C0000769|||C0000769|MTH|||  
AB|teratology|C0000769;C0220925|||C0000769|MSH|||  
AB|type A, type B||1|0.016|||||  
ABR|ABR|C1412101|||C1412101|HUGO;OMIM|||  
ABR|ABR gene|C1412101|||C1412101|HUGO;MTH|||  
ABR|ACTIVE BCR-RELATED GENE|C1412101|||C1412101|OMIM|||  
ABR|American Board of Radiology|||||1|0.0143|  
ABR|Auditory brainstem response|C0079319;C0085854|||||1|0.7614|  
ABR|MDB|C0025149;C0043896;C1412101|||C1412101|HUGO|||  
ABR|abortus-Bang-ring|||||1|  
ABR|abrasion|C0043242;C0580209;C1302752|||||1|  
ABR|absolute bedrest|||||1|  
ABR|active BCR-related gene|C1412101|||C1412101|HUGO|||  
ABR|agglutination test for brucellosis|||||1|  
ABR|anterior band remover|||||1|  
ABR|arterial baroreflex|||||1|  
ABR|artery to bronchus ratio|||||1|  
ABR|audiometric brainstem response|||||1|  
ABR|auditory brain stem evoked response|C0079319|||C0079319|MSH|||  
ABR|auditory brain stem response|C0079319;C0085854|||||1|0.2083|  
ABR|auditory brainstem|||||1|0.0101|  
ABR|auditory brainstem response|C0079319;C0085854|1|1.000|C0085854|CHV;MSH||||1|  
ABR|response testing|||||1|0.0059|  
ACE|AC|C1879503|||C0050385|PDQ|||  
ACE|AC chemotherapy protocol|C0050385|||C0050385|CHV|||  
ACE|AC protocol|C0050385|||C0050385|MSH|||  
ACE|ACE|C0022709;C0201888|||C0022709;C0050385;C0108844;C0201888;C0279078;C1413931|CSP;HUGO;NCI;OMIM;PDQ|||  
ACE|ACE (wrap)||1|0.016|||||  
ACE|ACE - Angiotensin-converting enzyme|C0022709|||C0022709|SNOMEDCT|||  
ACE|ACE Gene|C1413931|||C1413931|NCI|||  
ACE|ACE gene|C1413931|||C1413931|HUGO;LNC;MTH|||  
ACE|ACE measurement|C0201888|||C0201888|SNOMEDCT|||  
ACE|ACE-II|C0108844|||C0108844|NCI;PDQ|||  
ACE|ACE1|C1413931;C2984140|||C1413931|HUGO;OMIM|||  
ACE|ACe|C0022709;C0201888|||C0050385|NCI;PDQ|||  
ACE|ANGIOTENSIN I-CONVERTING ENZYME|C0022709;C1413931|||C1413931|OMIM|||

ACE|ANTIGENS CD 143|||C0022709|MSH|||  
ACE|APE|C0032636;C1675848||C0279078|NCI;PDQ|||  
ACE|APE chemotherapy protocol|C0279078||C0279078|CHV|||  
ACE|ARA-C/CDDP/VP-16|||C0279078|NCI;PDQ|||  
ACE|AVE|C0108844||C0108844|NCI;PDQ|||  
ACE|Addenbrooke's Cognitive Examination|||1|0.0017|  
ACE|Angiotensin Converting Enzyme|C0022709||C0022709;C0201888|MSH;NCI;NDFRT|||  
ACE|Angiotensin Converting Enzyme Measurement|C0201888||C0201888|NCI|||  
ACE|Angiotensin I Converting Enzyme|C0022709;C1413931||C0022709|MSH|||  
ACE|Angiotensin I Converting Enzyme (Peptidyl-Dipeptidase A) 1  
Gene|||C1413931|NCI|||  
ACE|Angiotensin I-Converting Enzyme|C0022709;C1413931||C0022709|MSH;NDFRT|||  
ACE|Angiotensin converting enzyme|C0022709||C0022709|LNC;SNOMEDCT|||  
ACE|Angiotensin converting enzyme inhibitors|C0003015;C2757044|||1|0.0023|  
ACE|Angiotensin converting enzyme  
measurement|C0201888||C0201888|MTH;SNOMEDCT|||  
ACE|Angiotensin converting enzyme measurement  
(procedure)|||C0201888|SNOMEDCT|||  
ACE|Angiotensin-Converting Enzyme|C0022709||C0022709|NCI|||  
ACE|Angiotensin-I-converting enzyme measurement|C0201888||C0201888|SNOMEDCT|||  
ACE|Angiotensin-converting enzyme|C0022709||C0022709|SNOMEDCT|||  
ACE|Angiotensin-converting enzyme (substance)|||C0022709|SNOMEDCT|||  
ACE|Antigens, CD143|C0022709||C0022709|MSH;NDFRT|||  
ACE|CA|||C0050385|NCI;PDQ|||  
ACE|CA protocol|C0050385||C0050385|MSH|||  
ACE|CAE|||C0108844|NCI;PDQ|||  
ACE|CAVP|C0055598;C0108844;C0163868||C0108844|NCI;PDQ|||  
ACE|CAVP-16|C0108844||C0108844|NCI;PDQ|||  
ACE|CD 143 ANTIGENS|||C0022709|MSH|||  
ACE|CD143|C0022709;C1413931;C2599700;C2984140||C0022709;C1413931|HUGO;NCI|||  
ACE|CD143 Antigen|C0022709||C0022709|NCI|||  
ACE|CD143 Antigens|C0022709||C0022709|MSH;NDFRT|||  
ACE|CDE|C0108844;C1521917||C0108844|NCI;PDQ|||  
ACE|CDE chemotherapy protocol|C0108844||C0108844|CHV|||  
ACE|CDE protocol|C0108844||C0108844|MSH|||  
ACE|CDE protocol-  
cyclophosphamide/doxorubicin/etoposide|C0108844||C0108844|MTH|||  
ACE|CED|||C0108844|NCI;PDQ|||  
ACE|CTX/DOX|||C0050385|NCI;PDQ|||  
ACE|CTX/DOX/VP-16|||C0108844|NCI;PDQ|||  
ACE|Carboxycathepsin|C0022709||C0022709|MSH;NCI;NDFRT;SNOMEDCT|||  
ACE|Cisplatin/Cytarabine/Etoposide|||C0279078|NCI|||  
ACE|Cyclophosphamide/Doxorubicin|||C0050385|NCI|||  
ACE|Cyclophosphamide/Doxorubicin/Etoposide|||C0108844|NCI|||  
ACE|DCP1|C0752526;C1413931;C2984140||C1413931|OMIM|||  
ACE|DIPEPTIDYL CARBOXYPEPTIDASE 1|C0022709;C1413931||C1413931|OMIM|||  
ACE|Dipeptidyl Carboxypeptidase 1|C0022709;C1413931||C0022709|NCI|||  
ACE|Dipeptidyl Carboxypeptidase I|C0022709||C0022709|NCI|||  
ACE|Dipeptidyl Peptidase A|C0022709||C0022709|MSH;NDFRT|||  
ACE|Dipeptidyl carboxypeptidase I|C0022709||C0022709|SNOMEDCT|||  
ACE|Dipeptidyl carboxypeptidase I (substance)|||C0022709|SNOMEDCT|||  
ACE|Doxorubicin/Cyclophosphamide|C0050385||C0050385|NCI|||  
ACE|EC 3.2.1.-|||C0022709|NCI|||  
ACE|EC 3.4.15.1|||C0022709|NCI|||  
ACE|KININASE II|C0022709;C1413931||C1413931|OMIM|||  
ACE|Kininase A|||C0022709|MSH;NDFRT|||  
ACE|Kininase II|C0022709;C1413931||C0022709|MSH;NCI;NDFRT;SNOMEDCT|||

ACE|Peptidase P|C0022709|||C0022709|NCI;SNOMEDCT|||  
ACE|Peptidyl Dipeptidase A|C0022709|||C0022709|MSH|||  
ACE|Peptidyl dipeptidase A measurement|C0201888|||C0201888|SNOMEDCT|||  
ACE|Peptidyl dipeptidase A measurement (procedure)|||C0201888|SNOMEDCT|||  
ACE|Peptidyl-Dipeptidase A|C0022709|||C0022709|MSH;MTH;NDFRT|||  
ACE|Peptidyl-Dipeptidase A [Chemical/Ingredient]|||C0022709|NDFRT|||  
ACE|Peptidyl-dipeptidase A|C0022709|||C0022709|SNOMEDCT|||  
ACE|accessory cholera enterotoxin|C0216868|||C0216868|MSH|||1  
ACE|acentric|||1  
ACE|acerebellar|||1|0.0021|  
ACE|acetaldehyde|C0000966|||C0000966|AOD;CHV;CSP;LNC;MSH;NCI;NDFRT;SNOMEDCT|||  
ACE|acetate|C0000975|||C0000975|AOD;CHV;CSP;LNC;MTH;NCI;NDFRT;RXNORM;SNOMEDCT;VA  
NDF|||  
ACE|acetone|C0001002|||C0001002|AOD;CHV;CSP;LCH;LNC;MSH;MTH;NCI;NDFRT;RXNORM;SNO  
MEDCT;VANDF|||  
ACE|acetonitrile|C0050456|||1  
ACE|acetylcholine esterase|C0001044|||1|0.0009|  
ACE|acetylcholinesterase|C0001044|||C0001044;C1412122|AOD;CHV;CSP;HUGO;LNC;MSH;M  
TH;NDFRT;OMIM;RXNORM;SNOMEDCT|1|0.0055|  
ACE|actinium emanation|||1  
ACE|acute care for elderly|||1  
ACE|acute cerebral encephalopathy|||1  
ACE|acute coronary event|||1  
ACE|adrenocortical extract|||1  
ACE|advanced combined encoder|||1  
ACE|adverse clinical event|||1  
ACE|aerobic chair exercise|||1  
ACE|aerosol cloud enhancer|||1  
ACE|affinity capillary electrophoresis|||1|0.0116|  
ACE|alcohol, chloroform, ether|||1  
ACE|amygdaloid central nucleus|||1|0.0036|  
ACE|angiotensin I converting enzyme (peptidyl-dipeptidase A)  
1|||C1413931|HUGO|||  
ACE|angiotensin converting  
enzyme|C0022709|||C0022709;C0201888;C2258685|CHV;CSP;GO;LNC;MSH;NCI;NDFRT;SNOMED  
CT|||  
ACE|angiotensin converting enzyme (ACE) test|||C0201888|CHV|||  
ACE|angiotensin converting enzyme gene|||1|0.0015|  
ACE|angiotensin converting enzyme i|C0022709|||C0022709|CHV|||  
ACE|angiotensin converting enzymes|C0022709|||C0022709|CHV|||  
ACE|angiotensin i converting enzyme|C0022709;C1413931|||C0022709|CHV|||  
ACE|angiotensin-converting enzyme|C0022709|1|0.982|C0022709|CHV|1|0.9545|1  
ACE|antegrade colonic enema|||1  
ACE|antegrade continence enema||1|0.002||1|0.0044|1  
ACE|arm crank ergometer|||1|0.0011|  
ACE|arm crank ergometry|||1|0.0009|  
ACE|autologous-cultured epithelium|||1  
ACE|central amygdaloid nucleus|C0175219|||C0175219|FMA|1|0.0032|  
ACE|central nucleus of the amygdala|||1|0.0061|  
ACE|cisplatin, cytarabine, and etoposide chemotherapy  
protocol|||C0279078|CHV|||  
ACE|cisplatin/cytarabine/etoposide|||C0279078|PDQ|||  
ACE|cisplatin/cytarabine/etoposide protocol|C0279078|||C0279078|MTH|||  
ACE|cyclophosphamide and etoposide|||1|0.0006|  
ACE|cyclophosphamide doxorubicin (AC protocol)|||C0050385|CHV|||  
ACE|cyclophosphamide doxorubicin (AC) protocol|||C0050385|CHV|||

ACE|cyclophosphamide, doxorubicin and etoposide chemotherapy protocol|||C0108844|CHV|||  
ACE|cyclophosphamide/doxorubicin|||C0050385|PDQ|||  
ACE|cyclophosphamide/doxorubicin protocol|C0050385|||C0050385|MTH|||  
ACE|cyclophosphamide/doxorubicin/etoposide|||C0108844|PDQ|||  
ACE|dipeptidyl peptidase|C0022709|||C0022709|CHV|||  
ACE|doxorubicin cyclophosphamide|C0050385|||C0050385|CHV|||  
ACE|kininase|C0022709|||C0022709|CHV|||  
ACE|peptidyl dipeptidase A|C0022709|||C0022709|CSP|||  
ACL|ACL|C0683459;C1412125|||C0683459;C1412125|AOD;HUGO;OMIM|||  
ACL|ACLY|C1412125|||C1412125|HUGO;OMIM|||  
ACL|ACLY gene|C1412125|||C1412125|HUGO;MTH|||  
ACL|ATP CITRATE LYASE|C0004199;C1412125|||C1412125|OMIM|||  
ACL|ATP citrate lyase|C0004199;C1412125|||C1412125|HUGO|||  
ACL|ATP citrate synthase|C0004199;C1412125|||C1412125|HUGO|||  
ACL|ATP-citrate lyase|C0004199;C1412125|||1|0.009|  
ACL|ATPCL|C1412125|||C1412125|HUGO;OMIM|||  
ACL|Achievement Checklist|||1|  
ACL|Adjective Check List|C0683459|||C0683459|AOD;MTH|1|0.0082|  
ACL|Adjective CheckList|||1|  
ACL|Allen Cognitive Level|||1|  
ACL|American cutaneous leishmaniasis|C1328252|||1|0.0301|  
ACL|CLATP|C1412125|||C1412125|HUGO;OMIM|||  
ACL|accessory collateral ligament|||1|  
ACL|acetyl-L-carnitine|C0524474|1|0.008|||1|  
ACL|acromegaloid features, cutis verticis gyrata, corneal leukoma|||1|  
ACL|adenocarcinoma of the lung|C0152013|||1|0.0043|  
ACL|adjective check list|C0683459|||C0683459|CHV|||  
ACL|anal canal length|||1|  
ACL|anterior|C0205094|||1|0.0043|  
ACL|anterior cruciate|||1|0.0047|  
ACL|anterior cruciate ligament|C0078960;C1748452|1|0.984|C0078960;C1748452|CHV;FMA;MSH;MTH;NCI;SNOMEDCT;UWDA|1|0.6521|1|  
ACL|anti-cardiolipin|||1|0.0105|  
ACL|anti-cardiolipin antibody|C0162596|||1|0.0066|  
ACL|antibodies to cardiolipin|||1|0.009|  
ACL|anticardiolipin||1|0.002||1|0.0781|1|  
ACL|anticardiolipin antibodies|C0162596|||1|0.1831|  
AC|(drug) AC||1|0.322|||1|  
AC|A|||C0560271|NCI|||  
AC|AC|C1879503|||C0003354;C0050385;C1300813;C1412573;C1550738;C1879503|HL7V3.0;HUGO;LNC;NCI;OMIM;PDQ|||  
AC|AC DEFICIENCY|C1412573|||C1412573|OMIM|||  
AC|AC Regimen|C1879503|||C1879503|NCI|||  
AC|AC chemotherapy protocol|C0050385|||C0050385|CHV|||  
AC|AC protocol|C0050385|||C0050385|MSH|||  
AC|AC regimen|C1879503|||C1879503|NCI|||  
AC|ACDase|C1412573|||C1412573|OMIM|||  
AC|ACE|C0022709;C0201888|||C0050385|CSP|||  
AC|ACID CDase|C1412573|||C1412573|OMIM|||  
AC|ACID CERAMIDASE|C1412573;C2350443|||C1412573|OMIM|||  
AC|ACID CERAMIDASE DEFICIENCY|C0268255;C1412573|||C1412573|OMIM|||  
AC|ACe|C0022709;C0201888|||C0050385|NCI;PDQ|||  
AC|AG|||C0003354|NCI|||  
AC|ANTIGUA AND BARBUDA|||C0003354|NCI|||  
AC|ASAH|C1412573|||C1412573|OMIM|||

AC|ASAHL|C1412573|||C1412573|HUGO;OMIM|||  
AC|ASAHL gene|C1412573|||C1412573|HUGO;MTH|||  
AC|ATG|||C0003354|NCI|||  
AC|Abdominal Circumference|C1300813|||C1300813|MTH|||  
AC|Abdominal circumference|C1300813|||C1300813|LNC;SNOMEDCT|||  
AC|Abdominal circumference (observable entity)|||C1300813|SNOMEDCT|||  
AC|Acebutolol|C0000946|||1|0.0037|  
AC|Acinetobacter calcoaceticus|C0085467|||1|  
AC|Acre|C0560271;C2347175|||C0560271|NCI|||  
AC|Acre British|C0560271|||C0560271|NCI|||  
AC|Acre International|||C0560271|NCI|||  
AC|Adriamycin and cyclophosphamide|||1|0.003|  
AC|Adriamycin-Cytosan Regimen|C1879503|||C1879503|MTH;NCI|||  
AC|Air Conduction|C0234744|||1|0.0055|  
AC|Antigua and Barbuda|||C0003354|AOD;MSH;MTH;NCI;SNOMEDCT|||  
AC|Antigua and Barbuda (geographic location)|||C0003354|SNOMEDCT|||  
AC|Ar|C2986463|||C0560271|NCI|||  
AC|Arachnoid cysts|C0078981|||1|0.003|  
AC|Autographa californica|C2767814|||1|0.0033|  
AC|Barbuda and Antigua|||C0003354|MSH|||  
AC|Before Meal|C1550738|||C1550738|NCI|||  
AC|Before Meals|C1550738|||C1550738|NCI|||  
AC|Before food|C1550738|||C1550738|SNOMEDCT|||  
AC|Before food (qualifier value)|||C1550738|SNOMEDCT|||  
AC|Before meal|C1550738|||C1550738|SNOMEDCT|||  
AC|Before meal (qualifier value)|||C1550738|SNOMEDCT|||  
AC|CA|||C0050385|NCI;PDQ|||  
AC|CA Regimen|C1879503|||C1879503|NCI|||  
AC|CA protocol|C0050385|||C0050385|MSH|||  
AC|CERAMIDASE DEFICIENCY|C0268255;C2936785|||C1412573|OMIM|||  
AC|CTX/DOX|||C0050385|NCI;PDQ|||  
AC|Cyclophosphamide/Doxorubicin|||C0050385|NCI|||  
AC|Doxorubicin/Cyclophosphamide|C0050385|||C0050385|NCI|||  
AC|FARBER DISEASE|C0268255;C1412573;C2936785|||C1412573|OMIM|||  
AC|FARBER LIPOGRANULOMATOSIS|C0268255;C1412573|||C1412573|OMIM|||  
AC|FLJ21558|C1412573|||C1412573|HUGO|||  
AC|N-ACYLSPHINGOSINE AMIDOHYDROLASE 1|C1412573|||C1412573|OMIM|||  
AC|N-ACYLSPHINGOSINE DEACYLASE|C1412573|||C1412573|OMIM|||  
AC|N-LAURYLSPHINGOSINE DEACYLASE DEFICIENCY|C1412573;C2936785|||C1412573|OMIM|||  
AC|N-acylsphingosine amidohydrolase (acid ceramidase) 1|||C1412573|HUGO|||  
AC|NATO code for HCN|||1|  
AC|PHP32|C1412573|||C1412573|HUGO|||  
AC|Preprandial|C1550738|||C1550738|SNOMEDCT|||  
AC|[ACR\_BR]|C0560271|||C0560271|NCI|||  
AC|abcoulomb|||1|  
AC|abdominal circumference|C1300813|1|0.004|C1300813|CHV;LNC;MTH;SNOMEDCT|||1|  
AC|abdominal compression|||1|  
AC|aberrant crypts|||1|0.0055|  
AC|ablation catheter|C0162563|||1|  
AC|abrupt closure|||1|  
AC|absorption coefficient|||1|  
AC|absorptive cell|||1|  
AC|abuse case|||1|  
AC|ac|C1879503|||C0560271|NCI|||  
AC|ac - ante cibum|C1550738|||C1550738|SNOMEDCT|||  
AC|accessory cell|C0003315|||C0003315|CSP;NCI|||  
AC|accessory cells|||1|0.0373|

AC|accommodative convergence|||||||1  
AC|acetate|C0000975|1|0.008|||1|0.0096|1  
AC|acetone|C0001002|||||1|0.0055|  
AC|acetyl|||||||1  
AC|acetylcholine|C0001041;C0523441|||C0001041;C0523441|AOD;CHV;CSP;FMA;LCH;LNC;M  
SH;MTH;NCI;NDFRT;RXNORM;SNOMEDCT;UWDA;VANDF|1|0.0052|  
AC|achaete|||||1|0.0074|  
AC|acid|C0001128|||||||1  
AC|acid ceramidase|C1412573;C2350443|||||1|0.0033|  
AC|acidified complement|||||||1  
AC|acidity|C0001128;C0847097;C0920750|||||||1  
AC|aconitine|C0001159|||||||1  
AC|acre|C0560271;C2347175|||C0560271|CHV;HL7V3.0;MTH;SNOMEDCT|||  
AC|acre (qualifier value)|||C0560271|SNOMEDCT|||  
AC|acres|C0560271|||C0560271|CHV|||  
AC|acromioclavicular|C0695640|1|0.316|C0695640|CHV|1|0.0251|1  
AC|acrylamide|C0050587|||||1|0.0037|  
AC|actinium|C0001246|||||||1  
AC|activated carbon|C0001275|||||1|0.0133|  
AC|activated  
charcoal|C0001275|||C0001275|CHV;MSH;MTHSPL;NCI;NDFRT;RXNORM;SNOMEDCT|1|0.0221|1  
AC|activation coefficient|||||1|0.003|  
AC|activity coefficient|||||1|0.0033|  
AC|acupuncture clinic|||||||1  
AC|acute|C0205178|||C0205178;C1547229;C1547295|CHV;DXP;HL7V2.5;MTH;NCI;SNOMEDCT|  
||1  
AC|acute acalculous cholecystitis|C0267842|||||1|0.0018|  
AC|acute  
cholecystitis|C0149520|||C0149520|AOD;CHV;COSTAR;ICD9CM;MSH;NCI;NDFRT;SNOMEDCT|1  
|0.0144|1  
AC|adenocarcinoma|C0001418|||C0001418|AOD;CHV;CSP;CST;LCH;MSH;MTH;NCI;NDFRT;OMIM  
;SNOMEDCT|1|0.0568|1  
AC|adenylate  
cyclase|C0001492;C1382029|||C0001492;C1382029|AOD;CHV;CSP;MSH;MTH;NCI;NDFRT;SNOM  
EDCT|1|0.2107|1  
AC|adenylate cyclase activity|C1151015|||||1|0.0044|  
AC|adenyllyl cyclase|C0001492|||||1|0.1985|1  
AC|adherent cell|||||||1  
AC|adherent cells|||||1|0.0081|  
AC|adrenal  
cortex|C0001613|||C0001613|AOD;CHV;FMA;LCH;LNC;MSH;MTH;NCI;SNOMEDCT;UWDA|||1  
AC|adrenocorticoid|||||||1  
AC|adriamycin cyclophosphamide||1|0.236|||1  
AC|aesthetic component|||||1|0.0103|  
AC|affinity chromatography|C0008551|||||1|0.0048|  
AC|aftercoming|||||||1  
AC|air chamber|||||||1  
AC|air changes|||||||1  
AC|air conditioning|C0001864|||C0001864|CHV;LCH;MSH|||  
AC|air conduction|C0234744|||C0234744|SNOMEDCT|||1  
AC|alcoholic  
cirrhosis|C0023891|||C0023891|AOD;CHV;COSTAR;MSH;NCI;NDFRT;SNOMEDCT|||1  
AC|alcoholic coma|C0394017|||||||1  
AC|all culture|||||||1  
AC|allergic conjunctivitis|C0009766|||||1|0.0055|  
AC|allyl chloride|C0051228|||||1|0.0026|  
AC|alternating|C0332270|||||1|0.0033|

AC|alternating current|C0442830|1|0.002|C0442830|CHV;SNOMEDCT|1|0.0428|1  
AC|alveolar crest|||||1  
AC|ambulatory  
care|C0002423;C1555966|||C0002423;C1555966|AOD;CHV;CSP;HL7V3.0;MSH|||1  
AC|ambulatory controls|||||1  
AC|ammonium chloride|C0002615|||||1|0.0018|  
AC|amniocentesis|C0002627|||C0002627|AOD;CHV;CSP;LCH;LNC;MEDLINEPLUS;MSH;NCI;SNO  
MEDCT|1|0.0077|  
AC|amygdaloid complex|C0002708|||||1|0.0048|  
AC|anchor cell|||||1|0.0044|  
AC|anchored catheter|||||1  
AC|anesthesia circuit|||||1  
AC|angiocellular|||||1  
AC|ante cibum|C1550738|||C1550738|CHV;NCI;SNOMEDCT|||  
AC|ante cibus|C1550738|||C1550738|MTH|||  
AC|antecubital|C1549091|1|0.002|C1549091|HL7V2.5|||1  
AC|anterior|C0205094|||||1|0.0044|  
AC|anterior chamber|C0003151|||C0003151|CHV;CSP;LNC;MSH;NCI|1|0.0579|1  
AC|anterior cingulate|||||1|0.0059|  
AC|anterior circulation|||||1  
AC|anterior colporrhaphy|C0195224|||C0195224|CHV;MTHICD9;SNOMEDCT|||1  
AC|anterior column|||||1  
AC|anterior  
commissure|C0152335;C1289546|||C0152335;C1289546|FMA;NCI;SNOMEDCT|1|0.024|1  
AC|anterior cruciate|||||1  
AC|antibiotic concentrate|||||1  
AC|anticholinergic|C0242896|||||1  
AC|anticoagulant|C0003280;C0848112|||C0003280|CHV;CSP;LNC;NCI;NDFRT;SNOMEDCT|1|0  
.0063|1  
AC|anticoagulation|C0003281;C2917212;C2919015|1|0.002|||1|0.007|  
AC|anticomplement|C0052026|||||1  
AC|anticomplementary|||||1  
AC|anticonvulsant|C0003286|||||1  
AC|antiinflammatory corticoid|||||1  
AC|antiphlogistic corticoid|||||1  
AC|aortic closure|||||1  
AC|aortic coarctation|C0003492|||||1|0.0033|  
AC|aortic compliance|||||1  
AC|aortic constriction|||||1|0.0085|  
AC|aortocoronary|C0450107|||C0450107|CHV;SNOMEDCT|||1  
AC|apatite cement|||||1|0.0022|  
AC|arm circumference|||||1|0.0081|1  
AC|arterial capillary|||||1  
AC|arterial compliance|||||1|0.0066|  
AC|articular cartilage|C0007303;C1281692|||||1|0.0111|  
AC|artificial circulation|C0868932|||||1|0.003|  
AC|asbestos cement|||||1|0.0022|  
AC|ascending  
colon|C0227375|||C0227375|AOD;CHV;CSP;FMA;MSH;MTH;MTHMST;NCI;SNOMEDCT;UWDA|||1  
AC|assist control||1|0.018|||||1  
AC|asymptomatic carriers|||||1|0.0033|  
AC|atrial contraction|||||1  
AC|atriocarotid|||||1  
AC|attenuation correction|C2986723|||||1|0.014|  
AC|attenuation-corrected|||||1|0.0044|  
AC|atypical carcinoid|||||1|0.0077|

AC|auditory  
cortex|C0004302|||C0004302|AOD;CHV;CSP;FMA;MSH;MTH;NCI;SNOMEDCT|1|0.024|  
AC|autoclave|C0179177|||1|  
AC|autologous cell|||1|  
AC|axillary clearance|||1|0.003|  
AC|axiocervical|||1|  
AC|azure C|C0052828|||1|  
AC|before food|C1550738|||C1550738|CHV|||  
AC|before meals|C1550738|1|0.084|||1|  
AC|capacity|C1516240|||1|0.0059|  
AC|carcinoma|C0007097|||1|0.0052|  
AC|concentration|C0086045;C1446561|||1|0.0033|  
AC|control|C0009932;C0243148;C1550141;C1882979;C2587213|||1|0.0092|  
AC|cyclophosphamide doxorubicin (AC protocol)|||C0050385|CHV|||  
AC|cyclophosphamide doxorubicin (AC) protocol|||C0050385|CHV|||  
AC|cyclophosphamide/doxorubicin|||C0050385|PDQ|||  
AC|cyclophosphamide/doxorubicin protocol|C0050385|||C0050385|MTH|||  
AC|doxorubicin and cyclophosphamide|||1|0.0077|  
AC|doxorubicin cyclophosphamide|C0050385|||C0050385|CHV|||  
AC|food before|||C1550738|CHV|||  
AC|maize Activator|||1|0.0063|  
AC|maize transposable element Activator|||1|0.0055|  
AC|meal before|||C1550738|CHV|||  
AC|nucleus accumbens|C0028633|||1|0.0037|  
AC|patients had alcoholic cirrhosis|||1|0.0004|  
AC|preprandial|C1550738|||C1550738|CHV|||  
ACTH|1-39 ACTH|C0001655|||C0001655|MSH;NDFRT|||  
ACTH|ACTH|||C0001655;C0201835;C1337111;C1523997;C1704793|AOD;CHV;CSP;FMA;HUGO;M  
SH;MTH;NCI;NDFRT;PDQ;SNOMEDCT;UWDA|||  
ACTH|ACTH (1-39)|||C0001655|MSH;NDFRT|||  
ACTH|ACTH - Adrenocorticotrophic hormone|C0001655|||C0001655|SNOMEDCT|||  
ACTH|ACTH measurement|C0201835|||C0201835|SNOMEDCT|||  
ACTH|ACTH preparation|C0001655|||C0001655|SNOMEDCT|||  
ACTH|Adrenocorticotrophic  
Hormone|C0001655;C1523997;C2825093|||C0001655|MSH;NDFRT|||  
ACTH|Adrenocorticotrophic  
hormone|C0001655;C1523997;C2825093|||C0001655|SNOMEDCT|||  
ACTH|Adrenocorticotrophic hormone level|C0201835|||C0201835|SNOMEDCT|||  
ACTH|Adrenocorticotropic|||1|0.0044|  
ACTH|Adrenocorticotropic  
Hormone|C0001655;C1523997;C2825093|||C0001655;C0201835;C1523997|MSH;NCI;NDFRT|||  
ACTH|Adrenocorticotropic Hormone Measurement|C0201835|||C0201835|NCI|||  
ACTH|Adrenocorticotropic Hormone [Chemical/Ingredient]|||C0001655|NDFRT|||  
ACTH|Adrenocorticotropic  
hormone|C0001655;C1523997;C2825093|||C0001655|SNOMEDCT|1|0.543|  
ACTH|Adrenocorticotropic hormone (substance)|||C0001655|SNOMEDCT|||  
ACTH|Adrenocorticotropic hormone measurement|C0201835|||C0201835|MTH;SNOMEDCT|||  
ACTH|Adrenocorticotropic hormone measurement (procedure)|||C0201835|SNOMEDCT|||  
ACTH|Adrenocorticotropic hormone preparation|C0001655|||C0001655|SNOMEDCT|||  
ACTH|Adrenocorticotropin|C0001655;C1523997|||C0001655;C1523997|FMA;MSH;NCI;NDFRT  
;SNOMEDCT;UWDA|||  
ACTH|CCTROP|C0001655|||C0001655|PDQ|||  
ACTH|CLIP|C0175722;C1705205|||C1337111;C1704793|HUGO;NCI|||  
ACTH|CORTICOTROPIN|C0001655;C1523997|||C0001655;C1523997|NCI;NDFRT;VANDF|||  
ACTH|Corticotrophic hormone|C0001655|||C0001655|SNOMEDCT|||  
ACTH|Corticotrophin|C0001655;C1523997|||C0001655|MSH;NDFRT;SNOMEDCT|||  
ACTH|Corticotrophin (1-39)|||C0001655|MSH;NDFRT|||

ACTH|Corticotrophins|C0001655|||C0001655|SNOMEDCT|||  
ACTH|Corticotrophins (product)|||C0001655|SNOMEDCT|||  
ACTH|Corticotrophins (substance)|||C0001655|SNOMEDCT|||  
ACTH|Corticotropic hormone|C0001655|||C0001655|SNOMEDCT|||  
ACTH|Corticotropin|C0001655;C1523997|||C0001655;C1523997|FMA;LNC;MSH;MTH;MTHSPL;  
NCI;NDFRT;RXNORM;SNOMEDCT|1|0.154|  
ACTH|Corticotropin (1-39)|||C0001655|MSH;NDFRT|||  
ACTH|Corticotropin (substance)|||C1523997|SNOMEDCT|||  
ACTH|Corticotropin measurement|C0201835|||C0201835|SNOMEDCT|||  
ACTH|Corticotropin preparation|C0001655|||C0001655|SNOMEDCT|||  
ACTH|Corticotropin preparation (product)|||C0001655|SNOMEDCT|||  
ACTH|Corticotropin preparation (substance)|||C0001655|SNOMEDCT|||  
ACTH|Corticotrophins|C0001655|||C0001655|SNOMEDCT|||  
ACTH|Hormone, Adrenocorticotrophic|C0001655;C1523997;C2825093|||C0001655|MSH|||  
ACTH|Hormone, Adrenocorticotropic|C0001655;C1523997;C2825093|||C0001655|MSH|||  
ACTH|LPH|C0023832;C1337111;C1416808|||C1337111|HUGO|||  
ACTH|MSH|||C1337111;C1704793|HUGO;NCI|||  
ACTH|NPP|C1337111|||C1337111|HUGO|||  
ACTH|POC|C1337111;C1704793|||C1337111;C1704793|HUGO;LNC;NCI;OMIM|||  
ACTH|POMC|||C1337111;C1704793|HUGO;NCI;OMIM|||  
ACTH|POMC Gene|C1337111|||C1337111|NCI|||  
ACTH|POMC gene|C1337111|||C1337111|HUGO;MTH|||  
ACTH|POMC wt Allele|C1704793|||C1704793|MTH;NCI|||  
ACTH|PRO-ACTH-ENDORPHIN|C0033195;C1337111|||C1337111|OMIM|||  
ACTH|PROOPIOMELANOCORTIN|C0033195;C1337111|||C1337111|OMIM|||  
ACTH|Proopiomelanocortin (Adrenocorticotropin/ Beta-Lipotropin/ Alpha-Melanocyte  
Stimulating Hormone/ Beta-Melanocyte Stimulating Hormone/ Beta-Endorphin)  
Gene|||C1337111|NCI|||  
ACTH|Proopiomelanocortin (Adrenocorticotropin/ Beta-Lipotropin/ Alpha-Melanocyte  
Stimulating Hormone/ Beta-Melanocyte Stimulating Hormone/ Beta-Endorphin) wt  
Allele|||C1704793|NCI|||  
ACTH|Recombinant Corticotropin|C1523997|||C1523997|MTH;NCI|||  
ACTH|Therapeutic ACTH|C1523997|||C1523997|NCI|||  
ACTH|acth hormone|C0001655|||C0001655|CHV|||  
ACTH|acth test|C0201835|||C0201835|CHV|||  
ACTH|acth testing|C0201835|||C0201835|CHV|||  
ACTH|adrenocorticotrophic|||1|0.0026|  
ACTH|adrenocorticotrophic hormone|C0001655;C1523997;C2825093|||C0001655|CHV|||  
ACTH|adrenocorticotropic  
hormone|C0001655;C1523997;C2825093|1|1.000|C0001655;C0201835;C1337111;C1523997;C  
2825093|AOD;CHV;CSP;HUGO;MSH;NCI;NDFRT;PDQ;SNOMEDCT|||1  
ACTH|adrenocorticotropic hormone  
(ACTH)|C0001655;C1523997;C2825093|||C0001655|CHV|||  
ACTH|adrenocorticotropic hormone (ACTH) level test|||C0201835|CHV|||  
ACTH|adrenocorticotropic peptide|C0001655|||C0001655|AOD|||  
ACTH|adrenocorticotropin|C0001655;C1523997|||C0001655;C1337111|AOD;CHV;HUGO|1|0.  
2646|  
ACTH|adrenotrophin|C0001655|||C0001655|AOD|||  
ACTH|adrenotropic hormone|C0001655|||C0001655|AOD|||  
ACTH|adrenotropin|C0001655|||C0001655|AOD|||  
ACTH|alpha-melanocyte stimulating hormone|C0002302;C1337111|||C1337111|HUGO|||  
ACTH|beta-endorphin|C0005210;C1337111|||C1337111|HUGO|||  
ACTH|beta-lipotropin|C0023832;C1337111|||C1337111|HUGO|||  
ACTH|beta-melanocyte stimulating hormone|C0005261;C1337111|||C1337111|HUGO|||  
ACTH|corticotrophin|C0001655;C1523997|||C0001655|AOD;CHV|1|0.0255|  
ACTH|corticotrophins|C0001655|||C0001655|CHV|||

ACTH|corticotropin|C0001655;C1523997|||C0001655;C0201835|AOD;CHV;CSP;GO;NCI;PDQ|  
||  
ACTH|corticotropins|C0001655|||C0001655|CHV|||  
ACTH|plasma adrenocorticotrophin|||||1|0.0059|  
ACTH|proopiomelanocortin|C0033195;C1337111|||C1337111|HUGO|||  
ADA|ADA|C1060325|||C0001457;C0002456;C1151644;C1412179;C1705019|GO;HUGO;MSH;NCI;  
OMIM|||  
ADA|ADA - Adenosine deaminase|C0001457|||C0001457|SNOMEDCT|||  
ADA|ADA Gene|C1412179|||C1412179|NCI|||  
ADA|ADA gene|C1412179|||C1412179|HUGO;MTH|||  
ADA|ADENOSINE AMINOHYDROLASE|C0001457;C1412179|||C1412179|OMIM|||  
ADA|ADENOSINE DEAMINASE|C0001457;C1412179|||C0001457;C1412179|MTH;OMIM|||  
ADA|Ada|C1060325|||C1060325|NCBI|||  
ADA|Ada Lindl.|C1060325|||C1060325|NCBI|||  
ADA|Adenine Deaminase|C0001457;C0050739|||C0001457|NCI|||  
ADA|Adenosine Aminohydrolase|C0001457;C1412179|||C0001457|MSH;NCI;NDFRT|||  
ADA|Adenosine Deaminase|C0001457;C1412179|||C0001457|MSH;NCI;NDFRT|||  
ADA|Adenosine Deaminase Gene|C1412179|||C1412179|NCI|||  
ADA|Adenosine Deaminase [Chemical/Ingredient]||||C0001457|NDFRT|||  
ADA|Adenosine aminohydrolase|C0001457;C1412179|||C0001457|MSH;NDFRT|||  
ADA|Adenosine deaminase|C0001457;C1412179|||C0001457|LCH;LNC;SNOMEDCT|1|0.6517|  
ADA|Adenosine deaminase (substance)|||C0001457|SNOMEDCT|||  
ADA|Adenosine deaminase activity|C1149733|||||1|0.0159|  
ADA|American Dental Association|C0002456|||C0002456|CHV;MSH;MTH;NCI|1|0.0257|  
ADA|American Diabetes Association|C1705019|1|0.992|C1705019|MTH;NCI|1|0.1002|  
ADA|American association dental||||C0002456|CHV|||  
ADA|Americans with Disabilities Act|||||1|0.1846|1|  
ADA|Americans with Disabilities Act of 1990|||||1|0.0093|  
ADA|Aminohydrolase, Adenosine|C0001457;C1412179|||C0001457|MSH|||  
ADA|Association, American Dental|C0002456|||C0002456|MSH|||  
ADA|Azodicarbonamide|C0043716|||||1|0.0055|  
ADA|Deaminase, Adenosine|C0001457;C1412179|||C0001457|MSH|||  
ADA|Dental Association, American|C0002456|||C0002456|MSH|||  
ADA|DmpF|C1151644|||C1151644|GO|||  
ADA|EC 3.5.4.4||||C0001457|NCI|||  
ADA|Genus Ada|C1060325|||C1060325|MTH|||  
ADA|acetaldehyde dehydrogenase (acetylating)  
activity|C1151644|||C1151644|GO;MTH|||  
ADA|adenosine aminohydrolase|C0001457;C1412179|||C0001457|CSP|||  
ADA|adenosine  
deaminase|C0001457;C1412179|1|0.002|C0001457;C1412179|CHV;CSP;HUGO;LCH;LNC;MSH;M  
TH;NCI;NDFRT;OMIM;SNOMEDCT|||1|  
ADA|adenosine deaminase gene|C1412179|||||1|0.0038|  
ADA|alcohol dependence and abuse|||||1|0.0033|  
ADA|alternated delay acquisition|||||1|  
ADA|anterior descending artery|||||1|  
ADA|antideoxyribonucleic acid antibody|||||1|  
ADA|approved dietary allowance|||||1|  
ADD|4 Androstene 3,17 dione||||C0002860|MSH|||  
ADD|4-Androstene-3,17-dione||||C0002860|MSH;NCI;NDFRT|||  
ADD|ADD|C1883712|||C0002860;C0004269;C1548443|HL7V2.5;MEDLINEPLUS;SNOMEDCT|||  
ADD|ADD action code||||C1548443|MTH|||  
ADD|ADIONE - Delta 4-androstenedione|C0002860|||C0002860|SNOMEDCT|||  
ADD|ANDROSTENEDIONE|C0002860;C0337432|||C0002860|NDFRT;VANDF|||  
ADD|Add|C1883712|||C1524062;C1720086;C1883712|LNC;NCI;SNOMEDCT|||  
ADD|Add - dosing instruction fragment||||C1720086|MTH;SNOMEDCT|||  
ADD|Add - dosing instruction fragment (qualifier value)|||C1720086|SNOMEDCT|||

ADD|Add - instruction imperative|C1883712|||C1883712|MTH|||  
ADD|Added|C1524062|||C1524062|NCI|||  
ADD|Addition|C1883712|||C1883712|NCI|||  
ADD|Additional|C1524062|||C1524062|LNC;MTH;NCI|||  
ADD|Androst-4-ene-3,17-dione|||C0002860|MSH;NCI;NDFRT|||  
ADD|Androstanedione|C0002860|||C0002860|SNOMEDCT|||  
ADD|Androstanedione (substance)|||C0002860|SNOMEDCT|||  
ADD|Androstenedione|C0002860;C0337432|||C0002860|LNC;MSH;MTH;NCI;NDFRT;RXNORM;SNOMEDCT|||  
ADD|Androstenedione (substance)|||C0002860|SNOMEDCT|||  
ADD|Androstenedione [Chemical/Ingredient]|||C0002860|NDFRT|||  
ADD|Attention Deficit Disorder|C0041671;C0339002|||1|0.7991|  
ADD|Attention deficit disorder of childhood|C0004269|||C0004269|ICD9CM|||  
ADD|Child attention deficit disorder|C0004269|||C0004269|MTH;MTHICD9;SNOMEDCT|||  
ADD|Child attention deficit disorder (disorder)|||C0004269|SNOMEDCT|||  
ADD|Child attention deficit disorder NOS|C0004269|||C0004269|SNOMEDCT|||  
ADD|Child attention deficit disorder NOS (disorder)|||C0004269|SNOMEDCT|||  
ADD|Delta 4-androstenedione|C0002860|||C0002860|SNOMEDCT|||  
ADD|Delta-4-Androstenedione|C0002860|||C0002860|NCI|||  
ADD|Therapeutic Androstenedione|C0002860|||C0002860|NCI|||  
ADD|Therapeutic\_Androstenedione|C0002860|||C0002860|NCI|||  
ADD|acceptable daily dose|||1|  
ADD|acute diarrheal disease|||1|0.0268|  
ADD|addition|C1883712|||1|  
ADD|adduction|C0231457|||1|  
ADD|adenosine deaminase|C0001457;C1412179|||1|  
ADD|afterdischarge duration|||1|0.0625|  
ADD|alcohol and drug dependency|||1|  
ADD|androsta-1,4-diene-3,17-dione|||1|0.0402|  
ADD|androstenedione|C0002860;C0337432|||C0002860|AOD;CHV;CSP|||  
ADD|androstenedione (ADD)|C0002860;C0337432|||C0002860|CHV|||  
ADD|angled delivery device|||1|  
ADD|anterior disc displacement|||1|0.0491|  
ADD|attention deficit disorder|C0041671;C0339002|1|0.990|||1|  
ADD|auditory discrimination|C0234747|||1|  
ADD|average daily dose|||1|  
ADD|child attention deficit disorder (child ADD)|C0004269|||C0004269|CHV|||  
ADD|delta 4 Androstenedione|C0002860|||C0002860|MSH|||  
ADD|delta-4-Androstenedione|C0002860|||C0002860|MSH;NDFRT|||  
ADD|delta4-Androstene-3,17-dione|||C0002860|NCI|||  
ADD|let there be added|||1|  
ADD|surgical induction of anterior disk displacement|||1|0.0223|  
ADHD|ADD - Attention deficit disorder with hyperactivity|||C1263846|SNOMEDCT|||  
ADHD|ADDH|C1263846;C2676242|||C1263846|CSP;MSH|||  
ADHD|ADHD|C1263846|||C1263846|CHV;CSP;MEDLINEPLUS;MSH;OMIM|||  
ADHD|ADHD (attention deficit hyperactivity disorder)|||C1263846|CSP|||  
ADHD|ADHD - Attention deficit disorder with hyperactivity|C1263846|||C1263846|SNOMEDCT|||  
ADHD|ATTENTION DEFICIT DIS WITH HYPERACTIVITY|||C1263846|MSH|||  
ADHD|ATTENTION DEFICIT HYPERACTIVITY DIS|||C1263846|MSH|||  
ADHD|ATTENTION DEFICIT-HYPERACTIVITY DISORDER|C1263846|||C1263846|OMIM|||  
ADHD|Attention Deficit Disorder with Hyperactivity|C1263846|||C1263846|MSH;NDFRT|||  
ADHD|Attention Deficit Disorder with Hyperactivity [Disease/Finding]|||C1263846|NDFRT|||  
ADHD|Attention Deficit Disorders with Hyperactivity|C1263846|||C1263846|MSH;NDFRT|||

ADHD|Attention Deficit Hyperactivity Disorder|C1263846|||C1263846|MEDLINEPLUS;MSH;NDFRT|1|0.9959|  
ADHD|Attention Deficit Hyperactivity Disorders|C1263846|||C1263846|MSH;NDFRT|||  
ADHD|Attention deficit disorder|C0041671;C0339002|||C1263846|SNOMEDCT|||  
ADHD|Attention deficit disorder (disorder)|||C1263846|SNOMEDCT|||  
ADHD|Attention deficit disorder of childhood with hyperactivity|||C1263846|ICD9CM|||  
ADHD|Attention deficit hyperactivity disorder|C1263846|||C1263846|MTH;OMIM;SNOMEDCT|||  
ADHD|Attention deficit hyperactivity disorder (ADHD)|C1263846|||C1263846|OMIM|||  
ADHD|Attention deficit hyperactivity disorder (disorder)|||C1263846|SNOMEDCT|||  
ADHD|Attention deficit hyperactivity disorder, predominantly hyperactive impulsive type|C1263846|||C1263846|SNOMEDCT|||  
ADHD|Attention deficit hyperactivity disorder, predominantly hyperactive impulsive type (disorder)|||C1263846|SNOMEDCT|||  
ADHD|Attention deficit hyperkinetic disorder|C1263846|||C1263846|SNOMEDCT|||  
ADHD|Attention-Deficit Disorder, Predominantly Hyperactive-Impulsive Type|C1263846|||C1263846|MTH|||  
ADHD|Attn deficit w hyperact|||C1263846|ICD9CM|||  
ADHD|Childhood hyperkinetic syndrome|C1263846|||C1263846|SNOMEDCT|||  
ADHD|Childhood hyperkinetic syndrome (disorder)|||C1263846|SNOMEDCT|||  
ADHD|HYPERACTIVITY OF CHILDHOOD|C1263846|||C1263846|OMIM|||  
ADHD|HYPERKINETIC SYNDROME|C1263846|||C1263846|CST|||  
ADHD|Hyperactive child syndrome|C1263846|||C1263846|SNOMEDCT|||  
ADHD|Hyperactivity Disorder NOS|C1263846|||C1263846|MTH|||  
ADHD|Hyperactivity Disorder, Predominantly Hyperactive-Impulsive Type|C1263846|||C1263846|MTH|||  
ADHD|Hyperkinetic Syndrome|C1263846|||C1263846|MSH;NDFRT|||  
ADHD|Hyperkinetic disorder|C1263846|||C1263846|SNOMEDCT|||  
ADHD|Hyperkinetic synd NOS|||C1263846|ICD9CM|||  
ADHD|Hyperkinetic syndrome|C1263846|||C1263846|SNOMEDCT|||  
ADHD|Hyperkinetic syndrome NOS|C1263846|||C1263846|MTHICD9;SNOMEDCT|||  
ADHD|Hyperkinetic syndrome NOS (disorder)|||C1263846|SNOMEDCT|||  
ADHD|Hyperkinetic syndrome of childhood|C1263846|||C1263846|ICD9CM|||  
ADHD|Overactive child syndrome|C1263846|||C1263846|SNOMEDCT|||  
ADHD|SYNDROME HYPERKINETIC|||C1263846|CST|||  
ADHD|Syndromes, Hyperkinetic|C1263846|||C1263846|MSH|||  
ADHD|Unspecified hyperkinetic syndrome of childhood|C1263846|||C1263846|ICD9CM|||  
ADHD|[X]Hyperkinetic disorder, unspecified|||C1263846|SNOMEDCT|||  
ADHD|[X]Hyperkinetic disorder, unspecified (disorder)|||C1263846|SNOMEDCT|||  
ADHD|addh|C1263846;C2676242|||C1263846|CHV|||  
ADHD|attention deficit disorder with hyperactivity|C1263846|||C1263846|AOD|1|0.0041|  
ADHD|attention deficit hyper disorder|C1263846|||C1263846|CHV|||  
ADHD|attention deficit hyperactivity disorder|C1263846|1|0.998|C1263846|AOD;CSP;MEDLINEPLUS;MSH;MTH;NDFRT;OMIM;SNOMEDCT|||1|  
ADHD|attention deficit hyperactivity disorder (ADHD)|C1263846|||C1263846|CHV|||  
ADHD|attention deficit(hyper) disorder|C1263846|||C1263846|CHV|||  
ADHD|attention deficits disorder hyper|C1263846|||C1263846|CHV|||  
ADHD|childhood hyperkinetic syndrome|C1263846|||C1263846|AOD|||  
ADHD|disorder hyperactivity|C1263846|||C1263846|CHV|||  
ADHD|hyperactive child syndrome|C1263846|||C1263846|AOD|||  
ADHD|hyperactivity disorder|C1263846|||C1263846|CHV|||  
ADHD|hyperkinetic disorder|C1263846|||C1263846|CHV|||  
ADHD|hyperkinetic syndrome|C1263846|||C1263846|CHV|||

ADHD|minimal brain dysfunction|C1263846;C1321905|||C1263846|CHV|||  
ADL|50-DAG|C1420005|||C1420005|OMIM|||  
ADL|50kd DAG|C1420005|||C1420005|HUGO|||  
ADL|A2|||C1420005|HUGO|||  
ADL|ADHALIN|C0248537;C1420005|||C1420005|OMIM|||  
ADL|ADL|C0001288;C1420005|||C0001288;C1420005|CSP;LNC;MSH;NCI;OMIM;SNOMEDCT|||  
ADL|Activities of Daily Living|C0001288|||C0001288|MSH|1|0.935|  
ADL|Activities of Daily Living (activity)|C0001288|||C0001288|MTH|||  
ADL|Activities of Daily Living Scale|||1|0.0084|  
ADL|Activities of everyday life|C0001288|||C0001288|SNOMEDCT|||  
ADL|Activities, Daily Living|C0001288|||C0001288|MSH|||  
ADL|Activity of Daily Living|C0001288|||C0001288|NCI|||  
ADL|Activity of daily living|C0001288|||C0001288|SNOMEDCT|||  
ADL|Activity of daily living (function)|||C0001288|SNOMEDCT|||  
ADL|Activity of daily living (observable entity)|||C0001288|SNOMEDCT|||  
ADL|Activity of daily living, function (observable entity)|||C0001288|SNOMEDCT|||  
ADL|Activity, Daily Living|C0001288|||C0001288|MSH|||  
ADL|Amsterdam Depression List|||1|  
ADL|DAG2|C1420005|||C1420005|OMIM|||  
ADL|DMA2|C1420005;C1842550|||C1420005|HUGO|||  
ADL|DYSTROGLYCAN 2|C1420005|||C1420005|OMIM|||  
ADL|DYSTROPHIN-ASSOCIATED GLYCOPROTEIN, 50-KD|||C1420005|OMIM|||  
ADL|Daily Activity|C0001288|||C0001288|NCI|||  
ADL|Daily Living Activities|C0001288|||C0001288|MSH|||  
ADL|Daily Living Activity|C0001288|||C0001288|MSH|||  
ADL|Household Activity|C0001288|||C0001288|NCI|||  
ADL|LGMD2D|C1420005;C1842550|||C1420005|HUGO|||  
ADL|Living Activities, Daily|C0001288|||C0001288|MSH|||  
ADL|Living Activity, Daily|C0001288|||C0001288|MSH|||  
ADL|SARCOGLYCAN, ALPHA|C0248537;C1420005|||C1420005|OMIM|||  
ADL|SCARMD1|C1420005|||C1420005|HUGO|||  
ADL|SGCA|C1420005|||C1420005|HUGO;OMIM|||  
ADL|SGCA gene|C1420005|||C1420005|HUGO;LNC;MTH|||  
ADL|Sarcoglycan, alpha (50kd dystrophin-associated glycoprotein; adhalin)|||C1420005|HUGO|||  
ADL|acid detergent lignin|||1|0.0122|  
ADL|activities of daily life|||1|0.0298|  
ADL|activities of daily living|C0001288|1|0.988|C0001288|CHV;NCI|||1|  
ADL|activities of daily living (ADL)|C0001288|||C0001288|CHV|||  
ADL|activity of daily living|C0001288|||C0001288|CHV;CSP;NCI;SNOMEDCT|||  
ADL|acute adenolymphangitis|||1|0.0046|  
ADL|adhalin|C0248537;C1420005|||C1420005|HUGO|||  
ADL|adhalin (limb girdle muscular dystrophy 2D)|||C1420005|HUGO|||  
ADL|adl|C0001288;C1420005|||C0001288|CHV|||  
ADL|adls|C0001288|||C0001288|CHV|||  
ADL|adolescent medicine|C0001581|||1|  
ADL|adrenoleukodystrophy|C0162309;C1412084|||1|  
ADL|aerobic dive limit|||1|0.0061|  
ADL|daily activities|C0871707|||1|0.0038|  
ADL|daily living activities|C0001288|||C0001288|CHV|||  
ADL|functional ability|C0001288|||C0001288|CHV;CSP|||  
ADL|sarcoglycan, alpha (50kDa dystrophin-associated glycoprotein)|||C1420005|HUGO|||  
AFB|AFB - Acid fast bacillus|C0483226|||C0483226|SNOMEDCT|||  
AFB|Acid-fast bacillus|C0483226|||C0483226|MTH;SNOMEDCT|||  
AFB|Acid-fast bacillus (organism)|||C0483226|SNOMEDCT|||

AFB|acetate-free biofiltration|C0282467|||||1|0.0608|  
AFB|acid fast bacillus|C0483226|||C0483226|CHV|||  
AFB|acid-fast bacilli|||||1|0.7317|  
AFB|acid-fast bacillus|C0483226|1|0.990|C0483226|CHV;MTH;SNOMEDCT|1|0.0608|1  
AFB|afb|C0483226|||C0483226|CHV|||  
AFB|aflatoxin B|C0085754|||||1|  
AFB|aflatoxin B1|C0085180|||||1|0.1279|  
AFB|aflatoxin biomarker|||||1|  
AFB|air-fluidized bed|C0179267|||||1|  
AFB|aortofemoral bypass|C0149619|||||1|0.0189|1  
AFB|aspirated foreign body|C0686705|||||1|  
AFB|scid-fast bacilli (AFB)|||C0483226|CHV|||  
AFI|acute febrile illness|||||1|  
AFI|amaurotic familial idiocy|C0282220|||||1|  
AFI|amniotic fluid index|C0552315|1|1.000|||1|0.9098|1  
AFI|atrial flutter|C0004239;C1963068|||||1|0.0902|  
AFO|ankle-foot orthosis||1|1.000|||1|1|1|  
AFP|ACID FINGER PROTEIN|C1421661|||C1421661|OMIM|||  
AFP|AFP|||C0002210;C0201539;C1367597;C1421661|AOD;DXP;HUGO;NCI;NDFRT;OMIM|||  
AFP|AFP - Alpha-fetoprotein|C0002210|||C0002210|SNOMEDCT|||  
AFP|AFP Gene|C1367597|||C1367597|NCI|||  
AFP|AFP gene|C1367597|||C1367597|HUGO;MTH|||  
AFP|AFP measurement|C0201539|||C0201539|SNOMEDCT|||  
AFP|ALPHA-FETOPROTEIN|C0002210;C0201539;C1367597|||C1367597|OMIM|||  
AFP|Alpha Fetoprotein|C0002210;C0201539;C1367597|||C0201539|NCI|||  
AFP|Alpha Fetoprotein measurement|C0201539|||C0201539|SNOMEDCT|||  
AFP|Alpha Foetoprotein measurement|C0201539|||C0201539|SNOMEDCT|||  
AFP|Alpha fetoproteins|C0002210|||C0002210|LCH|||  
AFP|Alpha one fetoprotein (AFP) test|||C0201539|CHV|||  
AFP|Alpha one fetoprotein measurement|C0201539|||C0201539|MTH|||  
AFP|Alpha-1-Fetoprotein|C0002210|||C0002210|LNC;NCI|||  
AFP|Alpha-1-Fetoprotein measurement|C0201539|||C0201539|SNOMEDCT|||  
AFP|Alpha-1-Fetoprotein measurement (procedure)|||C0201539|SNOMEDCT|||  
AFP|Alpha-1-Foetoprotein measurement|C0201539|||C0201539|SNOMEDCT|||  
AFP|Alpha-Fetoglobulin|C0002210|||C0002210|NCI|||  
AFP|Alpha-Fetoprotein|C0002210;C0201539;C1367597|||C0002210|NCI|||  
AFP|Alpha-Fetoprotein Gene|C1367597|||C1367597|NCI|||  
AFP|Alpha-fetoprotein|C0002210;C0201539;C1367597|||C0002210|SNOMEDCT|||  
AFP|Alpha-fetoprotein Measurement|C0201539|||C0201539|NCI|||  
AFP|Alpha-fetoprotein NOS|C0002210;C0201539;C1367597|||C0201539|SNOMEDCT|||  
AFP|Alpha-fetoprotein NOS (procedure)|||C0201539|SNOMEDCT|||  
AFP|FETA|C1367597;C1706654;C2828822|||C1367597|HUGO|||  
AFP|Fetuin|C0002210;C3178998|||C0002210|NDFRT;SNOMEDCT|||  
AFP|Fetuin (substance)|||C0002210|SNOMEDCT|||  
AFP|Fetuiins|C0002210;C3178998|||C0002210|AOD;NDFRT|||  
AFP|RNF95|C1421661|||C1421661|HUGO|||  
AFP|Serum alphafoetoprotein|||||1|0.0021|  
AFP|TRIM26|C1421661|||C1421661|HUGO;OMIM|||  
AFP|TRIM26 gene|C1421661|||C1421661|HUGO;MTH|||  
AFP|TRIPARTITE MOTIF-CONTAINING PROTEIN 26|C1421661|||C1421661|OMIM|||  
AFP|ZINC FINGER PROTEIN 173, FORMERLY|C1421661|||C1421661|OMIM|||  
AFP|ZNF173, FORMERLY|C1421661|||C1421661|OMIM|||  
AFP|a-fetoprotein|||||1|0.0036|  
AFP|acute flaccid paralysis|||||1|0.0496|1  
AFP|adiabatic fast passage|||||1|  
AFP|alfa-fetoprotein|C0002210;C0201539;C1367597|||||1|0.0048|  
AFP|alpha 1-fetoprotein|C0002210|||||1|0.0194|

AFP|alpha Fetoprotein|C0002210;C0201539;C1367597|||C0002210|MSH;SNOMEDCT|||  
AFP|alpha Fetoprotein (substance)|||C0002210|SNOMEDCT|||  
AFP|alpha Fetoproteins|C0002210|||C0002210|MSH|||  
AFP|alpha Foetoprotein|C0002210;C0201539;C1367597|||C0002210|SNOMEDCT|||  
AFP|alpha fetoprotein|C0002210;C0201539;C1367597|||C0002210|CHV;CSP|||  
AFP|alpha fetoprotein test|C0201539|||C0201539|CHV|||  
AFP|alpha fetoprotein testing|C0201539|||C0201539|CHV|||  
AFP|alpha fetoproteins|C0002210|||C0002210|AOD;CHV|||  
AFP|alpha foetoprotein|C0002210;C0201539;C1367597|||C0002210|CHV|||  
AFP|alpha-Fetoprotein|C0002210;C0201539;C1367597|||C0002210|MSH;NCI;NDFRT|||  
AFP|alpha-Fetoproteins|C0002210|||C0002210|MSH;MTH;NDFRT|||  
AFP|alpha-Fetoproteins [Chemical/Ingredient]|||C0002210|NDFRT|||  
AFP|alpha-feto-protein|C0002210;C0201539;C1367597|||1|0.017|  
AFP|alpha-  
fetoprotein|C0002210;C0201539;C1367597|1|0.996|C0002210;C1367597|HUGO;NCI|1|0.83  
4|1  
AFP|alpha-fetoprotein (AFP)|C0002210;C0201539;C1367597|||C0002210|CHV|||  
AFP|alphal-fetoprotein|C0002210|||1|0.0069|  
AFP|anterior faucial pillar|||1|  
AFP|anterior fontanel pressure|||1|0.0018|  
AFP|anterior fontanelle pressure|||1|0.0021|  
AFP|anterior forebrain pathway|||1|0.0051|  
AFP|anti-alpha-fetoprotein|||1|0.0042|  
AFP|antifreeze polypeptide|||1|0.0036|  
AFP|antifreeze protein|||1|0.0218|  
AFP|antifungal protein|||1|0.0051|  
AFP|ascending frontal parietal|||1|  
AFP|atrial filling pressure|||1|  
AFP|atypical facial pain|C0154729|||C0154729|CHV;SNOMEDCT|1|0.0048|1  
AFP|fetuin|C0002210;C3178998|||C0002210|CHV;CSP|||  
AFP|serum alpha-foetoprotein|C0373538;C0546833;C1287375|||1|0.003|  
AFP|serum alphafetoprotein|||1|0.0113|  
AFP|tripartite motif containing 26|||C1421661|HUGO|||  
AGA|18-alpha-glycyrrhetic acid|||1|0.0092|  
AGA|AGA|||C0071561;C0162311;C1412276|HUGO;OMIM;PDQ|||  
AGA|AGA gene|C1412276|||C1412276|HUGO;MTH|||  
AGA|AGA1|C0162311|||C0162311|OMIM|||  
AGA|ALOPECIA ANDROGENET|||C0162311|MSH|||  
AGA|ALOPECIA, ANDROGENETIC, 1|C0162311|||C0162311|OMIM|||  
AGA|ANDROGENET ALOPECIA|||C0162311|MSH|||  
AGA|ANDROGENETIC ALOPECIA|C0162311|||C0162311|OMIM|||  
AGA|ASPARTYLGLUCOSAMINIDASE|C0004025;C1412276|||C1412276|OMIM|||  
AGA|ASRG|C1412276|||C1412276|HUGO|||  
AGA|Alopecia hereditaria|C0162311|||C0162311|SNOMEDCT|||  
AGA|Alopecia hereditaria (disorder)|||C0162311|SNOMEDCT|||  
AGA|Alopecia, Androgenetic|C0162311|||C0162311|MSH|||  
AGA|Alopecia, Male Pattern|C0162311|||C0162311|MSH|||  
AGA|Androgenetic Alopecia|C0162311|||C0162311|MSH;MTH|||  
AGA|Androgenetic alopecia|C0162311|||C0162311|SNOMEDCT|||  
AGA|Androgenic alopecia|C0162311|||C0162311|SNOMEDCT|||  
AGA|Androgenic alopecia (disorder)|||C0162311|SNOMEDCT|||  
AGA|BALDNESS, MALE PATTERN|C0162311|||C0162311|OMIM|||  
AGA|Baldness, Male Pattern|C0162311|||C0162311|MSH|||  
AGA|Common baldness|C0162311|||C0162311|SNOMEDCT|||  
AGA|GLYCOSYLASPARAGINASE|C0004025;C1412276|||C1412276|OMIM|||  
AGA|Glutaminase-Asparaginase|C0071561|||C0071561|NCI|||  
AGA|Glutaminase-asparaginase|C0071561|||C0071561|MSH|||

AGA|Hereditary alopecia|C0162311|||C0162311|SNOMEDCT|||  
AGA|MPB|C0162311|||C0162311|OMIM|||  
AGA|Male Pattern Alopecia|C0162311|||C0162311|MSH|||  
AGA|Male Pattern Baldness|C0162311|||C0162311|MSH|||  
AGA|Male pattern alopecia|C0162311|||C0162311|SNOMEDCT|||  
AGA|Male pattern alopecia (disorder)|||C0162311|SNOMEDCT|||  
AGA|Male pattern baldness|C0162311|||C0162311|SNOMEDCT|||  
AGA|PEG-Glutaminase-Asparaginase|C0071561|||C0071561|NCI|||  
AGA|PEG-L-glutaminase-L-asparaginase|C0071561|||C0071561|MSH;NCI|||  
AGA|Pattern baldness|C0162311|||C0162311|SNOMEDCT|||  
AGA|Polyethylene Glycol-Glutaminase-Asparaginase|C0071561|||C0071561|NCI|||  
AGA|accelerated growth area|||1  
AGA|acetylglutamate|||1  
AGA|acute gonococcal arthritis|C2062407|||1  
AGA|allergic granulomatosis and angiitis|||1|0.0077|1  
AGA|allergic granulomatous angiitis|C0008728|||1|0.0169|  
AGA|alopecia androgenetic|||C0162311|CHV|||  
AGA|alopecia androgenic|||C0162311|CHV|||  
AGA|androgenetic alopecia|C0162311|||C0162311|CHV|1|0.1048|1  
AGA|androgenic alopecia|C0162311|||C0162311|CHV|||  
AGA|anti-gliadin|||1|0.0185|  
AGA|anti-gliadin antibodies|C0312639|||1|0.0354|  
AGA|anti-immunoglobulin A autoantibody|||1  
AGA|antibodies to gliadin|||1|0.0139|  
AGA|antigliadin|||1|0.0416|  
AGA|antigliadin antibodies|||1|0.114|  
AGA|antigliadin antibody|||1  
AGA|antiglomerular antibody|||1  
AGA|appropriate|C1548787|||1|0.0231|  
AGA|appropriate for gestational age|C2985271|1|1.000|C2985271|NCI|1|0.5378|1  
AGA|aspartylglucosaminidase|C0004025;C1412276|||C1412276|HUGO|1|0.0601|  
AGA|average gestational age|||1  
AGA|baldness male pattern|C0162311|||C0162311|CHV|||  
AGA|glutaminase-asparaginase|C0071561|||C0071561|PDQ|||  
AGA|glycosylasparaginase|C0004025;C1412276|||C1412276|HUGO|||  
AGA|male pattern alopecia|C0162311|||C0162311|CHV|||  
AGA|male pattern baldness|C0162311|||C0162311|CHV|||  
AGA|pattern baldness|C0162311|||C0162311|CHV|||  
AGA|polyethylene glycol-glutaminase-asparaginase|C0071561|||C0071561|MSH;MTH|||  
AGA|polyethyleneglycol-L-glutaminase-L-  
asparaginase|C0071561|||C0071561|MSH;NCI|||  
AGA|presents the official recommendations of the American Gastroenterological  
Association|||1|0.0169|  
AICD|AICD|C0972395;C2611803|||C2611803|GO|||  
AICD|APP intracellular domain|||1|0.0388|  
AICD|Activation-induced cell death of T cells|C2611803|||C2611803|MTH|||  
AICD|Automatic Implantable Cardioverter-  
Defibrillators|C0972395|||C0972395|MTH|||  
AICD|DEFIBRILLATOR, AUTOMATIC IMPLANTABLE  
CARDIOVERTER|C0972395|||C0972395|SPN|||  
AICD|activation-induced B cell apoptosis|||C2611803|GO|||  
AICD|activation-induced B-cell apoptosis|||C2611803|GO|||  
AICD|activation-induced cell death|||1|0.6478|1  
AICD|activation-induced cell death of B cells|||C2611803|GO|||  
AICD|activation-induced cell death of B lymphocytes|||C2611803|GO|||  
AICD|activation-induced cell death of B-cells|||C2611803|GO|||  
AICD|activation-induced cell death of B-lymphocytes|||C2611803|GO|||

AICD|activation-induced cell death of T cells|C2611803|||C2611803|GO|||  
AICD|activation-induced cell death of T lymphocytes|||C2611803|GO|||  
AICD|activation-induced cell death of T-cells|C2611803|||C2611803|GO|||  
AICD|activation-induced cell death of T-lymphocytes|||C2611803|GO|||  
AICD|aicd|C0972395;C2611803|||C0972395|CHV|||  
AICD|aicds|C0972395|||C0972395|CHV|||  
AICD|automatic implantable cardioverter defibrillator|C0972395|||1|0.3134|  
AICD|automatic implantable cardioverter-defibrillator|C0972395|1|1.000|||1|  
AICD|automatic implanted cardioverter-defibrillator|||1|1|  
AIDS|ACQUIRED IMMUNE DEFIC SYNDROME|||C0001175|MSH|||  
AIDS|ACQUIRED IMMUNE DEFICIENCY SYNDROME|C0001175|||C0001175|COSTAR|||  
AIDS|ACQUIRED IMMUNO DEFIC SYNDROME|||C0001175|MSH|||  
AIDS|ACQUIRED IMMUNODEFIC SYNDROME|||C0001175|MSH|||  
AIDS|ACQUIRED IMMUNODEFICIENCY SYNDROME, AIDS|||C0001175|NCI|||  
AIDS|AIDS|C0001175|||C0001175|AOD;CHV;CSP;CST;MEDLINEPLUS;MSH;MTHICD9;NCI;NDFRT;  
SNOMEDCT|||  
AIDS|AIDS (disorder)|||C0001175|SNOMEDCT|||  
AIDS|AIDS - Acquired immunodeficiency syndrome|||C0001175|SNOMEDCT|||  
AIDS|AIDS disorders|C0001175|||C0001175|CHV|||  
AIDS|AIDS, ACQUIRED IMMUNODEFICIENCY SYNDROME|||C0001175|NCI|||  
AIDS|AIDS, NOS|C0001175|||C0001175|SNOMEDCT|||  
AIDS|AUTOIMMUNE DEFICIENCY SYNDROME|C0001175|||C0001175|CST|||  
AIDS|Acquired Immune Deficiency|C0001175|||C0001175|NCI|||  
AIDS|Acquired Immune Deficiency Syndrome|C0001175|||C0001175|MSH;NDFRT|||  
AIDS|Acquired Immuno Deficiency Syndrome|C0001175|||C0001175|MSH|||  
AIDS|Acquired Immuno-Deficiency Syndrome|C0001175|||C0001175|MSH;NDFRT|||  
AIDS|Acquired Immuno-Deficiency Syndromes|C0001175|||C0001175|MSH|||  
AIDS|Acquired Immunodeficiency  
Syndrome|C0001175|||C0001175|MEDLINEPLUS;MSH;MTH;NCI;NDFRT|||  
AIDS|Acquired Immunodeficiency Syndrome [Disease/Finding]|||C0001175|NDFRT|||  
AIDS|Acquired Immunodeficiency Syndromes|C0001175|||C0001175|MSH|||  
AIDS|Acquired human immunodeficiency virus infection syndrome  
NOS|||C0001175|SNOMEDCT|||  
AIDS|Acquired human immunodeficiency virus infection syndrome NOS  
(disorder)|||C0001175|SNOMEDCT|||  
AIDS|Acquired immune defic. synd.|||C0001175|SNOMEDCT|||  
AIDS|Acquired immune defic. syndr.|||C0001175|SNOMEDCT|||  
AIDS|Acquired immune deficiency syndrome|C0001175|||C0001175|MTHICD9;SNOMEDCT|||  
AIDS|Acquired immune deficiency syndrome (AIDS)|C0001175|||C0001175|SNOMEDCT|||  
AIDS|Acquired immune deficiency syndrome (AIDS)  
(disorder)|||C0001175|SNOMEDCT|||  
AIDS|Acquired immune deficiency syndrome (disorder)|||C0001175|SNOMEDCT|||  
AIDS|Acquired immune deficiency syndrome, NOS|C0001175|||C0001175|SNOMEDCT|||  
AIDS|Acquired immunodeficiency  
syndrome|C0001175|||C0001175|MEDLINEPLUS;MTHICD9;SNOMEDCT|||  
AIDS|Acquired immunodeficiency syndrome, NOS|C0001175|||C0001175|SNOMEDCT|||  
AIDS|Assessment of Intelligibility of Dysarthric Speech|||1|  
AIDS|IMMUNE DEFICIENCY SYNDROME ACQUIRED <AIDS>|||C0001175|QMR|||  
AIDS|IMMUNE DEFICIENCY SYNDROME ACQUIRED AIDS|||C0001175|RAM|||  
AIDS|IMMUNODEFIC SYNDROME ACQUIRED|||C0001175|MSH|||  
AIDS|IMMUNOL DEFIC SYNDROME ACQUIRED|||C0001175|MSH|||  
AIDS|Immuno-Deficiency Syndrome, Acquired|C0001175|||C0001175|MSH|||  
AIDS|Immuno-Deficiency Syndromes, Acquired|C0001175|||C0001175|MSH|||  
AIDS|Immunodeficiency Syndrome, Acquired|C0001175|||C0001175|MSH;NDFRT|||  
AIDS|Immunodeficiency Syndromes, Acquired|C0001175|||C0001175|MSH|||  
AIDS|Immunodeficiency due to human immunodeficiency virus  
infection|C0001175|||C0001175|SNOMEDCT|||

AIDS|Immunologic Deficiency Syndrome, Acquired|C0001175|||C0001175|MSH;NDFRT|||  
AIDS|Syndrome, Acquired Immuno-Deficiency|C0001175|||C0001175|MSH|||  
AIDS|Syndrome, Acquired Immunodeficiency|C0001175|||C0001175|MSH|||  
AIDS|Syndromes, Acquired Immuno-Deficiency|C0001175|||C0001175|MSH|||  
AIDS|Syndromes, Acquired Immunodeficiency|C0001175|||C0001175|MSH|||  
AIDS|acquired immune deficiency|C0001175|||1|0.0015|  
AIDS|acquired immune deficiency  
syndrome|C0001175|1|0.992|C0001175|AOD;COSTAR;MSH;MTHICD9;NDFRT;SNOMEDCT|1|0.272  
3|1  
AIDS|acquired immuno-deficiency syndrome|C0001175|||C0001175|MSH;NDFRT|||  
AIDS|acquired immunodeficiency|C0596032|||1|0.0014|  
AIDS|acquired immunodeficiency disease|||1|0.0021|  
AIDS|acquired immunodeficiency  
syndrome|C0001175|||C0001175|AOD;CHV;CSP;NCI|1|0.7216|  
AIDS|acquired immunodeficiency syndrome (AIDS)|C0001175|||C0001175|CHV|||  
AIDS|acquired immunodeficiency virus|||1|0.0013|  
AIDS|autoimmune deficiency syndrome|C0001175|||C0001175|CHV|||  
AIDS|hearing aids|C0018768|1|0.008|||  
AI|(class) AI||1|0.002|||  
AI|(stage) AI||1|0.002|||  
AI|AI|C0003353;C0003504|||C0003139;C0003353|MSH;NCI|||  
AI|AI - Aortic incompetence|C0003504|||C0003504|SNOMEDCT|||  
AI|AIA|C0003353|||C0003353|NCI|||  
AI|ANGUILLA|C0003025;C0003353|||C0003353|NCI|||  
AI|ANTAG|||C0003139|MSH|||  
AI|AORTIC INSUFFICIENCY|C0003504|||C0003504|COSTAR;DXP;NCI|||  
AI|AORTIC REGURGITATION|C0003504|||C0003504|DXP;NCI|||  
AI|AORTIC VALVE INSUFFICIENCY|C0003504|||C0003504|DXP|||  
AI|AORTIC VALVE REGURGITATION|C0003504|||C0003504|COSTAR;DXP|||  
AI|AORTIC VALVE, INCOMPETENCE|C0003504|||C0003504|DXP|||  
AI|AORTIC VALVE, INSUFFICIENCY|C0003504|||C0003504|DXP|||  
AI|AORTIC VALVE, REGURGITATION|C0003504|||C0003504|DXP|||  
AI|AR|C2986463|||C0003504|NCI|||  
AI|AR - Aortic regurgitation|C0003504|||C0003504|SNOMEDCT|||  
AI|Adequate Intake|||1|0.0091|  
AI|Amelogenesis imperfecta|C0002452|||1|0.0397|  
AI|American Indian|C0002460|||1|0.0129|  
AI|Anguilla|C0003025;C0003353|||C0003353|AOD;NCI|||  
AI|Anguilla island|C0003353|||C0003353|SNOMEDCT|||  
AI|Anguilla island (geographic location)|||C0003353|SNOMEDCT|||  
AI|Antigua|C0003353|||C0003353|MSH;MTH|||  
AI|Aortic Incompetence|C0003504|||C0003504|MSH;NDFRT|||  
AI|Aortic Insufficiency|C0003504|||C0003504|NCI|||  
AI|Aortic Regurgitation|C0003504|||C0003504|COSTAR;MSH;NCI;NDFRT|||  
AI|Aortic Valve Incompetence|C0003504|||C0003504|MSH;NDFRT|||  
AI|Aortic Valve Insufficiency|C0003504|||C0003504|MSH;MTH;NDFRT|||  
AI|Aortic Valve Insufficiency [Disease/Finding]|||C0003504|NDFRT|||  
AI|Aortic incompetence|C0003504|||C0003504|SNOMEDCT|||  
AI|Aortic insufficiency|C0003504|||C0003504|OMIM;SNOMEDCT|||  
AI|Aortic regurgitation|C0003504|||C0003504|OMIM;SNOMEDCT|||  
AI|Aortic regurgitation, NOS|C0003504|||C0003504|SNOMEDCT|||  
AI|Aortic valve incompetence|C0003504|||C0003504|SNOMEDCT|||  
AI|Aortic valve incompetence, NOS|C0003504|||C0003504|SNOMEDCT|||  
AI|Aortic valve insufficiency|C0003504|||C0003504|LCH;SNOMEDCT|||  
AI|Aortic valve insufficiency, NOS|C0003504|||C0003504|SNOMEDCT|||  
AI|Aortic valve regurgitation|C0003504|||C0003504|OMIM;SNOMEDCT|||  
AI|Aortic valve regurgitation (disorder)|||C0003504|SNOMEDCT|||

AI|Aortic valve regurgitation, NOS|C0003504|||C0003504|SNOMEDCT|||  
AI|Apoptosis|C0162638|||1|0.0054|  
AI|Apoptotic|C1516044|||1|0.0059|  
AI|Artificial intelligence|C0003916|||1|0.0338|  
AI|Astragalus Injection|||1|0.0038|  
AI|Axonal injury|||1|0.007|  
AI|Incompetence, Aortic|C0003504|||C0003504|MSH|||  
AI|Incompetence, Aortic Valve|C0003504|||C0003504|MSH|||  
AI|Insufficiency, Aortic Valve|C0003504|||C0003504|MSH|||  
AI|Regurgitation, Aortic|C0003504|||C0003504|MSH|||  
AI|Regurgitation, Aortic Valve|C0003504|||C0003504|MSH;NDFRT|||  
AI|acceleration index|||1|  
AI|acceptable intake|||1|  
AI|accidental injury|C0151736|||C0151736|AOD;CHV;CST;NCI;SNOMEDCT|||1|  
AI|accidentally incurred|||1|  
AI|accommodative insufficiency|C0339687|||1|  
AI|acetabular index|||1|  
AI|active ingredient|C1292749;C1372955|||1|0.0204|  
AI|activity|C0026606;C0205177;C0439167;C0441655;C1561536|||1|0.0048|  
AI|acute ileus|||1|0.0064|  
AI|acute inflammation|C0333361|||1|  
AI|adiposity index|||1|  
AI|adrenal incidentalomas|||1|0.0043|  
AI|adrenal insufficiency|C0001623;C0405580|||1|0.0091|  
AI|after infection|||1|0.0027|  
AI|aggregation index|||1|  
AI|ai|C0003353;C0003504|||C0003504|CHV|||  
AI|airway inflammation|||1|0.0032|  
AI|allelic imbalance|C0887935|||1|0.0676|  
AI|allergy and immunology|C0002112|||C0002112|MSH|||1|  
AI|allergy index|||1|  
AI|aluminum|C0002367;C2348254|||1|0.0064|  
AI|amylogenesis imperfecta|||1|  
AI|anal index|||1|  
AI|anaphylatoxin  
inactivator|C0003766;C1413673|||C0003766;C1413673|MSH;NDFRT;OMIM;SNOMEDCT|||1|  
AI|anaphylatoxin inhibitor|||1|  
AI|anchorage-independent|||1|0.0097|  
AI|androgen-independent|||1|0.0263|  
AI|angiogenesis inhibitor|C0596087|||C0596087|CHV;CSP;NCI;SNOMEDCT|||1|  
AI|angiotensin I|C0003006|||1|0.1025|  
AI|angiotensin inhibitor|||1|  
AI|antagonists & inhibitors|C0003139|||C0003139|MSH;MTH|||  
AI|anti-inflammatory|C0003209;C1515999|||1|0.0054|  
AI|anxiety index|||1|  
AI|aortic incompetence|C0003504|||C0003504|CHV|1|0.0075|1|  
AI|aortic insufficiency|C0003504|1|0.972|C0003504|CHV|1|0.0472|1|  
AI|aortic regurgitation|C0003504|||C0003504|CHV;CSP|||  
AI|aortic valve incompetence|C0003504|||C0003504|CHV|||  
AI|aortic valve insufficiency|C0003504|||C0003504|CHV;CSP|||  
AI|aortic valve regurgitation|C0003504|||C0003504|CHV|||  
AI|apical impulse|C0277909|||1|  
AI|apnea index|||1|  
AI|apoptotic index|||1|0.1642|1|  
AI|apoptotic indices|||1|0.0086|  
AI|aromatase inhibitor|C0593802;C2757060|||1|0.0225|1|  
AI|articulation index|||1|

AI|artificial  
insemination|C0021587|1|0.004|C0021587;C0699895|AOD;CHV;CSP;ICD9CM;MEDLINEPLUS;M  
SH;MTH;NCI;SNOMEDCT|1|0.1797|1  
AI|artificial intelligence|C0003916|||1  
AI|artificially inseminated|||1|0.0139|  
AI|association-induction|||1|0.0048|  
AI|atherogenic index|||1  
AI|atrial insufficiency|||1  
AI|autoimmune|C0443146|||C0443146|CHV;NCI;SNOMEDCT|||1  
AI|autoimmunity|C0004368|||C0004368|CHV;CSP;MSH;NCI;SNOMEDCT|||1  
AI|avian influenza|C0016627|||1|0.0327|  
AI|avidity index|||1  
AI|axioincisal|||1  
AI|inhibitor/antagonist|||C0003139|CSP|||  
AI|intensity|C0522510|||1|0.0064|  
AI|primary|C0205225;C0439631|||1|0.0107|  
AI|primary auditory area|||1|0.0043|  
AI|primary auditory cortex|C2954070|||1|0.1041|  
AI|primary auditory field|||1|0.007|  
AKA|AKA|C1204024|||C1417685|HUGO|||  
AKA|Aka|C1204024|||C1204024|NCBI|||  
AKA|Aka (de Laubenfels, 1949)|||C1204024|NCBI|||  
AKA|Aka <sponge>|C1204024|||C1204024|MTH;NCBI|||  
AKA|Broussonetia papyrifera|C1199284|||C1199284|MTH;NCBI|||  
AKA|Broussonetia papyrifera L'Her. ex Vent.|||C1199284|NCBI|||  
AKA|Math4C|C1417685|||C1417685|HUGO|||  
AKA|NEUROD3|C1417685|||C1417685|OMIM|||  
AKA|NEUROG1|C1417685|||C1417685|HUGO;OMIM|||  
AKA|NEUROG1 gene|C1417685|||C1417685|HUGO;MTH|||  
AKA|NEUROGENIC DIFFERENTIATION 3|C1417685|||C1417685|OMIM|||  
AKA|NEUROGENIN 1|C1417685|||C1417685|OMIM|||  
AKA|NGN1|C1417685|||C1417685|OMIM|||  
AKA|above-knee amputation|C0002691|1|0.968|C0002691|CHV;NCI|1|0.1481|1  
AKA|aka|C1204024|||C1199284|NCBI|||  
AKA|alcoholic ketoacidosis|C0268039|||C0268039|AOD;SNOMEDCT|1|0.1667|1  
AKA|all known allergies|||1  
AKA|alpha-alkokainic acid|C2350922|||1  
AKA|also known as|||1|0.030|||1  
AKA|antikeratin antibodies|||1|0.6852|  
AKA|antikeratin antibody|||1  
AKA|bHLHa6|C1417685|||C1417685|HUGO|||  
AKA|broussonetia papyrifera|C1199284|||C1199284|CHV|||  
AKA|gou shu|C1199284|||C1199284|NCBI|||  
AKA|neurogenic differentiation 3|C1417685|||C1417685|HUGO|||  
AKA|neurogenin 1|C1417685|||C1417685|HUGO|||  
AKA|ngn1|C1417685|||C1417685|HUGO|||  
AKA|paper mulberry tree|C1199284|||C1199284|CHV|||  
AKA|paper-mulberry|C1199284|||C1199284|NCBI|||  
ALD|ADRENOLEUKODYSTROPHY|C0162309;C1412084|||C0162309|OMIM|||  
ALD|ALD|C0162309|||C0162309|CSP;OMIM;SNOMEDCT|||  
ALD|ALD (Adrenoleukodystrophy)|||C0162309|MSH;NDFRT|||  
ALD|ALDs (Adrenoleukodystrophy)|||C0162309|MSH|||  
ALD|Addison-Schilder disease|C0162309|||C0162309|CHV|||  
ALD|Adrenoleucodystrophy|C0162309;C1412084|||C0162309|SNOMEDCT|||  
ALD|Adrenoleukodystrophies|C0162309|||C0162309|MSH|||  
ALD|Adrenoleukodystrophies, X-Linked|C0162309|||C0162309|MSH|||

ALD|Adrenoleukodystrophy|C0162309;C1412084|||C0162309|MEDLINEPLUS;MSH;MTH;NCI;NDFRT;SNOMEDCT|||

ALD|Adrenoleukodystrophy (disorder)|||C0162309|SNOMEDCT|||

ALD|Adrenoleukodystrophy [Disease/Finding]|||C0162309|NDFRT|||

ALD|Adrenoleukodystrophy, X-Linked|C0162309|||C0162309|MSH|||

ALD|Schilder Addison Complex|C0162309|||C0162309|MSH|||

ALD|Schilder-Addison Complex|C0162309|||C0162309|MSH;NDFRT|||

ALD|Schilder-Addison complex|C0162309|||C0162309|SNOMEDCT|||

ALD|X Linked Adrenoleukodystrophy|C0162309|||C0162309|MSH|||

ALD|X-Linked Adrenoleukodystrophies|C0162309|||C0162309|MSH|||

ALD|X-Linked Adrenoleukodystrophy|C0162309|||C0162309|MSH;NDFRT|||

ALD|X-linked adrenoleucodystrophy|C0162309|||C0162309|SNOMEDCT|||

ALD|X-linked adrenoleukodystrophy|C0162309|||C0162309|MTHICD9|1|0.1352|

ALD|acetyl lysergic acid diethylamide||1|0.002|||

ALD|ad lib on demand||1|0.814|||

ALD|adreno-leukodystrophy|||1|0.016|

ALD|adrenoleucodystrophy|C0162309;C1412084|||C0162309|CHV|1|0.0178|

ALD|adrenoleukodystrophy|C0162309;C1412084|1|0.176|C0162309;C1412084|CHV;CSP;HUGO;MEDLINEPLUS;MSH;MTH;NCI;NDFRT;OMIM;SNOMEDCT|||1

ALD|adrenoleukodystrophy (ALD)|C0162309;C1412084|||C0162309|CHV|||

ALD|adrenomyeloneuropathy|C0162309;C1527231|||C0162309|CHV|||

ALD|alcoholic liver disease|C0023896|||C0023896|CHV;COSTAR;MSH;NCI;SNOMEDCT|1|0.4253|1

ALD|ald|C0162309|||C0162309|CHV|||

ALD|aldolase|C0016762|||C0016762;C0201839|AOD;CHV;CSP;LNC;MSH;NCI;NDFRT;SNOMEDCT|1|0.1032|1

ALD|aldosine|C0295644|||C0295644|MSH|||

ALD|aldosterone|C0002006|||1|

ALD|anterior|C0205094|||1|0.0267|

ALD|anterior latissimus dorsi|||1|0.194|1

ALD|anterior latissimus dorsi muscle|||1|0.016|

ALD|appraisal of language disturbances|||1|

ALD|approximate lethal dose|||1|

ALD|assistive listening device|C0493583|||1|

ALD|atomic layer deposition|||1|0.0196|

ALD|average lens density|||1|

ALD|melanodermic leukodystrophy|C0162309;C2931920|||C0162309|CHV|||

ALD|plasma aldosterone|||1|0.0463|

ALS|ACID-LABILE SUBUNIT|C1456383|||C1456383|OMIM|||

ALS|ACID-LABILE SUBUNIT DEFICIENCY|C1456383|||C1456383|OMIM|||

ALS|ALG|C0003372|||C0003372|NCI|||

ALS|ALS|||C0002736;C0003372;C1456383;C1704945|CHV;CSP;DXP;HUGO;MEDLINEPLUS;MSH;NCI;OMIM|||

ALS|ALS (Amyotrophic Lateral Sclerosis)|C0002736|||C0002736|MSH;NDFRT|||

ALS|ALS - Amyotrophic lateral sclerosis|C0002736|||C0002736|SNOMEDCT|||

ALS|ALS1|C1704945;C1862939|||C1704945|NCI|||

ALS|AMYOTROPHIC LATERAL SCLEROSIS|C0002736|||C0002736|DXP|||

ALS|Amyotrophic Lateral Sclerosis|C0002736|||C0002736|COSTAR;MEDLINEPLUS;MSH;MTH;NCI;NDFRT|||

ALS|Amyotrophic Lateral Sclerosis [Disease/Finding]|||C0002736|NDFRT|||

ALS|Amyotrophic Lateral Sclerosis/Progressive Muscular Atrophy|||C0002736|QMR|||

ALS|Amyotrophic lateral sclerosis|C0002736|||C0002736|ICD9CM;LCH;OMIM;SNOMEDCT|||

ALS|Amyotrophic lateral sclerosis (disorder)|||C0002736|SNOMEDCT|||

ALS|Amyotrophic sclerosis|||C0002736|ICD9CM|||

ALS|Antilymphocyte Globulin|C0003370;C0003372|||C0003372|NCI|||

ALS|Antilymphocyte Serum|C0003372|||C0003372|MSH;MTH;NCI;NDFRT|||  
ALS|Antilymphocyte Serum [Chemical/Ingredient]|||C0003372|NDFRT|||  
ALS|Antilymphocyte Serums|C0003372|||C0003372|MSH|||  
ALS|Antilymphocyte serum|C0003372|||C0003372|SNOMEDCT|||  
ALS|Bulbar motor neuron disease|C0002736|||C0002736|SNOMEDCT|||  
ALS|Disease, Lou-Gehrings|C0002736|||C0002736|MSH|||  
ALS|GEHRIGS DIS|||C0002736|MSH|||  
ALS|Gehrig Disease|C0002736|||C0002736|MSH|||  
ALS|Gehrig's Disease|C0002736|||C0002736|MSH;NDFRT|||  
ALS|Gehrigs Disease|C0002736|||C0002736|MSH|||  
ALS|IGFALS|C1456383|||C1456383|HUGO;OMIM|||  
ALS|IGFALS gene|C1456383|||C1456383|HUGO;MTH|||  
ALS|IGFBP, SOLUBLE|C1456383|||C1456383|OMIM|||  
ALS|INSULIN-LIKE GROWTH FACTOR-BINDING PROTEIN, ACID-LABILE  
SUBUNIT|C0170857;C1456383|||C1456383|OMIM|||  
ALS|IPOA|C1420306;C1704945|||C1704945|NCI|||  
ALS|LOU GEHRIG DIS|||C0002736|MSH|||  
ALS|LOU GEHRIG DISEASE|C0002736|||C0002736|DXP|||  
ALS|LOU GEHRIGS DIS|||C0002736|MSH|||  
ALS|Lateral Scleroses, Amyotrophic|C0002736|||C0002736|MSH|||  
ALS|Lou Gehrig Disease|C0002736|||C0002736|MSH;NCI;NDFRT|||  
ALS|Lou Gehrig's Disease|C0002736|||C0002736|MEDLINEPLUS;MSH;NDFRT|||  
ALS|Lou Gehrig's disease|C0002736|||C0002736|CSP;MEDLINEPLUS;SNOMEDCT|||  
ALS|Lou Gehrig's disease (ALS)|||C0002736|CHV|||  
ALS|Lou-Gehrings Disease|C0002736|||C0002736|MSH;NDFRT|||  
ALS|MOTOR NEURON DIS AMYOTROPHIC LATERAL SCLEROSIS|||C0002736|MSH|||  
ALS|Motor Neuron Disease, Amyotrophic Lateral  
Sclerosis|C0002736|||C0002736|MSH;NDFRT|||  
ALS|Motor neuron disease, bulbar|C0002736|||C0002736|MTHICD9|||  
ALS|SOD|||C1704945|NCI|||  
ALS|SOD1 wt Allele|C1704945|||C1704945|MTH;NCI|||  
ALS|Sclerosis, Amyotrophic Lateral|C0002736|||C0002736|MSH|||  
ALS|Serum, Antilymphocyte|C0003372|||C0003372|MSH|||  
ALS|Serums, Antilymphocyte|C0003372|||C0003372|MSH|||  
ALS|Superoxide Dismutase 1, Soluble (Amyotrophic Lateral Sclerosis 1 (Adult)) wt  
Allele|||C1704945|NCI|||  
ALS|acetolactate synthase|C0000999|||1|0.0156|  
ALS|acid labile subunit|C1456383|||1|0.0073|  
ALS|acid-labile subunit|C1456383|||1|  
ALS|acute lateral sclerosis|||1|  
ALS|advanced life support|C0419055|1|0.006|C0419055|CHV;SNOMEDCT|1|0.0726|1  
ALS|afferent loop syndrome|C0001727|||C0001727|CHV;DXP;MSH;NDFRT;SNOMEDCT|||1  
ALS|alternating least squares|||1|0.0032|  
ALS|amyotrophic lateral  
sclerosis|C0002736|1|0.994|C0002736|AOD;CHV;CSP|1|0.836|1  
ALS|amyotrophic laterals sclerosis|C0002736|||C0002736|CHV|||  
ALS|angiotensin-like substance|||1|  
ALS|antennal lobes|||1|0.0022|  
ALS|anterolateral sclerosis|||1|  
ALS|anti-lymphocyte serum|||1|0.015|  
ALS|anticipated lifespan|||1|  
ALS|antilymphocyte sera|C0003372|||1|0.0025|  
ALS|antilymphocyte  
serum|C0003372|||C0003372|CSP;MSH;MTH;NCI;NDFRT;SNOMEDCT|1|0.0455|1  
ALS|antiviral lymphocyte serum|||1|  
ALS|atypical lichenoid stomatitis|||1|

ALS|insulin-like growth factor binding protein, acid labile subunit|C0170857;C1456383|||C1456383|HUGO|||  
 ALS|lou gehrig disease|C0002736|||C0002736|CHV|||  
 ALS|lou gehrig's disease|C0002736|||C0002736|CHV|||  
 ALS|lou gehrigs disease|C0002736|||C0002736|CHV|||  
 ALT|AAT1|||C0001899|NCI|||  
 ALT|ALAT - Alanine aminotransferase|C0001899|||C0001899|SNOMEDCT|||  
 ALT|ALT|||C0001899;C0201836;C0376147;C2257651|AOD;GO;NCI|||  
 ALT|ALT - Alanine aminotransferase|C0001899|||C0001899|SNOMEDCT|||  
 ALT|ALT measurement|C0201836|||C0201836|SNOMEDCT|||  
 ALT|ALT1|C0001899;C1415274|||C0001899|NCI|||  
 ALT|Alanine 2 Oxoglutarate Aminotransferase|C0001899|||C0001899|MSH|||  
 ALT|Alanine Aminotransferase|C0001899;C0057041|||C0001899;C0201836|MSH;MTH;NCI;NDFRT|||  
 ALT|Alanine Aminotransferase Measurement|C0201836|||C0201836|NCI|||  
 ALT|Alanine Transaminase|C0001899|||C0001899|MSH;MTH;NDFRT|||  
 ALT|Alanine Transaminase [Chemical/Ingredient]|||C0001899|NDFRT|||  
 ALT|Alanine aminotransferase|C0001899;C0057041|||C0001899|LNC;SNOMEDCT|||  
 ALT|Alanine aminotransferase (substance)|||C0001899|SNOMEDCT|||  
 ALT|Alanine aminotransferase measurement|C0201836|||C0201836|MTH;SNOMEDCT|||  
 ALT|Alanine aminotransferase measurement (procedure)|||C0201836|SNOMEDCT|||  
 ALT|Alanine transaminase|C0001899|||C0001899|SNOMEDCT|||  
 ALT|Alanine-2-Oxoglutarate Aminotransferase|C0001899|||C0001899|MSH;NDFRT|||  
 ALT|Aminotransferase, Alanine|C0001899;C0057041|||C0001899|MSH|||  
 ALT|Aminotransferase, Alanine-2-Oxoglutarate|C0001899|||C0001899|MSH|||  
 ALT|GPT|||C0001899;C2257651|GO;NCI;SNOMEDCT|||  
 ALT|GPT measurement|C0201836|||C0201836|SNOMEDCT|||  
 ALT|GPT1|||C0001899|NCI|||  
 ALT|Glutamate pyruvate transaminase|C0001899;C1415274|||C0001899|SNOMEDCT|||  
 ALT|Glutamic Alanine Transaminase|C0001899|||C0001899|MSH|||  
 ALT|Glutamic Pyruvic Transaminase|C0001899|||C0001899|MSH|||  
 ALT|Glutamic pyruvate transaminase measurement|C0201836|||C0201836|SNOMEDCT|||  
 ALT|Glutamic-Alanine Transaminase|C0001899|||C0001899|MSH;NCI;NDFRT|||  
 ALT|Glutamic-Pyruvate Transaminase|C0001899|||C0001899|NCI|||  
 ALT|Glutamic-Pyruvic Transaminase|C0001899|||C0001899|MSH;MTH;NCI;NDFRT|||  
 ALT|Glutamic-alanine transaminase|C0001899|||C0001899|SNOMEDCT|||  
 ALT|Glutamic-pyruvic transaminase|C0001899|||C0001899|SNOMEDCT|||  
 ALT|L-Alanine:2-oxoglutarate aminotransferase|||C0001899|MSH;NDFRT|||  
 ALT|L-alanine:2-oxoglutarate aminotransferase|||C0001899|SNOMEDCT|||  
 ALT|L-alanine:2-oxoglutarate aminotransferase activity|C2257651|||C2257651|GO;MTH|||  
 ALT|S-ALAT|C0001899|||C0001899|AOD|||  
 ALT|SGPT|||C0001899;C0201836;C0376147|CHV;MSH;MTH;NCI;SNOMEDCT|||  
 ALT|SGPT (ALT)|||C0376147|NCI|||  
 ALT|SGPT - Glutamate pyruvate transaminase|C0376147|||C0376147|MTH;SNOMEDCT|||  
 ALT|SGPT measurement|C0201836|||C0201836|SNOMEDCT|||  
 ALT|Serum alanine aminotransferase|||1|0.5431|  
 ALT|Serum alanine transaminase|||1|0.1109|  
 ALT|Transaminase, Alanine|C0001899|||C0001899|MSH|||  
 ALT|Transaminase, Glutamic-Alanine|C0001899|||C0001899|MSH|||  
 ALT|Transaminase, Glutamic-Pyruvic|C0001899|||C0001899|MSH|||  
 ALT|alanine amino transferase|C0001899;C0057041|||1|0.09|  
 ALT|alanine aminotransaminase|||1|0.0133|  
 ALT|alanine aminotransferase|C0001899;C0057041|1|1.000|C0001899|AOD;CHV;CSP|||1  
 ALT|alanine aminotransferase (ALT) level test|||C0201836|CHV|||  
 ALT|alanine aminotransferase activity|C2257651|||C2257651|GO|1|0.0171|  
 ALT|alanine transaminase|C0001899|||C0001899|CHV;CSP|||

ALT|alanine transaminase (ALT)|C0001899|||C0001899|CHV|||  
ALT|alanine transaminase activity|C2257651|||C2257651|GO|||  
ALT|alanine transferase|C0376147|||C0376147|NCI|||  
ALT|alanine-alpha-ketoglutarate aminotransferase  
activity|C2257651|||C2257651|GO|||  
ALT|alanine-aminotransferase|C0001899;C0057041|||1|0.0284|  
ALT|alanine-pyruvate aminotransferase activity|C2257651|||C2257651|GO|||  
ALT|alt|||C0001899|CHV|||  
ALT|alt alanine aminotransferase|C0001899|||C0001899|CHV|||  
ALT|alt measurement|C0201836|||C0201836|CHV|||  
ALT|alternate|C0332270;C1523987|||1|  
ALT|alternative lengthening of telomeres|||1|0.0341|  
ALT|altitude|C0002349;C1649428|||1|0.0085|1  
ALT|alts|C0001899|||C0001899|CHV|||  
ALT|anterolateral thigh|||1|0.0123|  
ALT|anterolateral tract|||1|  
ALT|antibiotic lock technique|||1|  
ALT|argon laser trabeculopexy|||1|  
ALT|argon laser trabeculoplasty|C1319234|||1|0.1062|1  
ALT|autolymphocyte therapy|||1|0.0152|1  
ALT|auxiliary liver transplantation|||1|0.0076|  
ALT|avian laryngotracheitis|||1|  
ALT|glutamate pyruvate transaminase|C0001899;C1415274|||C0001899|AOD;CHV|||  
ALT|glutamic alanine transaminase|C0001899|||C0001899|CSP|||  
ALT|glutamic pyruvic transaminase|C0001899|||C0001899|CHV;CSP|||  
ALT|glutamic-pyruvic transaminase|C0001899|||C0001899|CHV|||  
ALT|gpt|||C0001899|CHV|||  
ALT|gpts|C0001899|||C0001899|CHV|||  
ALT|pyruvate-alanine aminotransferase activity|C2257651|||C2257651|GO|||  
ALT|s-alat|C0001899|||C0001899|CHV|||  
ALT|serum alanine transferase|||1|0.0133|  
ALT|serum glutamate pyruvate transaminase|C0376147|||C0376147|NCI|||  
ALT|serum glutamate pyruvate transaminase (SGPT)|C0376147|||C0376147|CHV|||  
ALT|transaminase glutamic-pyruvic|C0001899|||C0001899|CHV|||  
AMA|AMA|C0002461;C0279755;C2825862|||C0002461;C0279755;C2825862|MSH;NCI;PDQ|||  
AMA|ARA-C/L-PAM|||C0279755|NCI;PDQ|||  
AMA|American Medical Association|C0002461|||C0002461|CHV;MSH;MTH;NCI|1|0.286|  
AMA|American association medical|||C0002461|CHV|||  
AMA|Antimitochondrial Antibodies|C2825862|||C2825862|NCI|||  
AMA|Antimitochondrial Antibody Measurement|C2825862|||C2825862|MTH;NCI|||  
AMA|Antimitochondrial autoantibodies|||1|0.0409|  
AMA|Association, American Medical|C0002461|||C0002461|MSH|||  
AMA|Cytarabine/Melphalan|C0279755|||C0279755|NCI|||  
AMA|Medical Association, American|C0002461|||C0002461|MSH|||  
AMA|Mitochondrial Antibody|C0312621;C2825862|||C2825862|NCI|||  
AMA|actual mechanical advantage|||1|  
AMA|advanced maternal age||1|0.062||1|0.0301|1  
AMA|against medical advice||1|0.888||1|0.0989|1  
AMA|alkaline membrane assay|||1|  
AMA|amantadine|C0002403|||1|0.0366|  
AMA|anti-mitochondrial|||1|0.0215|  
AMA|anti-mitochondrial antibodies|||1|0.114|  
AMA|antimitochondrial|||1|0.0194|  
AMA|antimitochondrial antibodies|C2825862|||1|0.2882|  
AMA|antimitochondrial antibody|C0312621|1|0.050|||1|  
AMA|antimyosin antibody|||1|  
AMA|antithyroid microsomal antibody|||1|

AMA|apocrine membrane antigen|||||||1  
AMA|arm muscle area|||||1|0.0645|1  
AMA|augmentation of mandibular angle|||||||1  
AMA|autoregressive moving average|||||||1  
AMA|cytarabine/melphalan|C0279755|||C0279755|MTH;PDQ|||  
AML|ACUTE MYELOBLASTIC LEUKEMIA|C0023467|||C0023467|CST|||  
AML|ACUTE MYELOGENOUS LEUKEMIA|C0023467|||C0023467|COSTAR;OMIM|||  
AML|AML|C0023467|||C0023467|CSP;DXP;MEDLINEPLUS;NCI;OMIM;PDQ|||  
AML|AML - Acute Myeloid Leukemia|C0023467|||C0023467|NCI|||  
AML|AML - Acute myeloblastic leukaemia|C0023467|||C0023467|SNOMEDCT|||  
AML|AML - Acute myeloblastic leukemia|C0023467|||C0023467|SNOMEDCT|||  
AML|AML - Acute myeloid leukaemia|C0023467|||C0023467|SNOMEDCT|||  
AML|AML - Acute myeloid leukemia|C0023467|||C0023467|SNOMEDCT|||  
AML|AML, NOS|C0023467|||C0023467|NCI|||  
AML|ANLL|C0023467|||C0023467|CSP;MEDLINEPLUS;MSH;NCI;NDFRT;PDQ|||  
AML|Acute Myeloblastic Leukemia|C0023467|||C0023467|MEDLINEPLUS;MSH;NCI|||  
AML|Acute Myeloblastic Leukemias|C0023467|||C0023467|MSH|||  
AML|Acute Myelocytic Leukemia|C0023467|||C0023467|MSH;NCI|||  
AML|Acute Myelocytic Leukemias|C0023467|||C0023467|MSH|||  
AML|Acute Myelogenous Leukemia|C0023467|||C0023467|MSH;NCI|||  
AML|Acute Myelogenous Leukemias|C0023467|||C0023467|MSH;NCI|||  
AML|Acute Myeloid  
Leukemia|C0023467;C2984331|||C0023467|MEDLINEPLUS;MSH;NCI;NDFRT|||  
AML|Acute Myeloid Leukemia NOS|C0023467;C2984331|||C0023467|NCI|||  
AML|Acute Myeloid Leukemia Not Otherwise Categorized|||C0023467|NCI|||  
AML|Acute Myeloid Leukemia Not Otherwise  
Specified|C0023467;C2984331|||C0023467|NCI|||  
AML|Acute Myeloid Leukemia, NOS|C0023467;C2984331|||C0023467|NCI|||  
AML|Acute Myeloid Leukemias|C0023467|||C0023467|MSH|||  
AML|Acute Nonlymphoblastic Leukemia|C0023467|||C0023467|MSH|||  
AML|Acute Nonlymphoblastic Leukemias|C0023467|||C0023467|MSH|||  
AML|Acute Nonlymphocytic Leukemia|C0023467|||C0023467|MSH;NCI|||  
AML|Acute Nonlymphocytic Leukemias|C0023467|||C0023467|MSH|||  
AML|Acute granulocytic leukaemia|C0023467|||C0023467|SNOMEDCT|||  
AML|Acute granulocytic leukemia|C0023467|||C0023467|SNOMEDCT|||  
AML|Acute myeloblastic leukaemia|C0023467|||C0023467|SNOMEDCT|||  
AML|Acute myeloblastic leukemia|C0023467|||C0023467|OMIM;SNOMEDCT|||  
AML|Acute myeloblastic leukemia (disorder)|||C0023467|SNOMEDCT|||  
AML|Acute myelocytic leukaemia|C0023467|||C0023467|SNOMEDCT|||  
AML|Acute myelocytic leukemia|C0023467|||C0023467|OMIM;SNOMEDCT|||  
AML|Acute myelogenous leukaemia|C0023467|||C0023467|SNOMEDCT|||  
AML|Acute myelogenous leukemia|C0023467|||C0023467|MEDLINEPLUS;OMIM;SNOMEDCT|||  
AML|Acute myeloid leukaemia|C0023467;C2984331|||C0023467|SNOMEDCT|||  
AML|Acute myeloid leukaemia - category|C0023467|||C0023467|SNOMEDCT|||  
AML|Acute myeloid leukaemia, disease|C0023467|||C0023467|SNOMEDCT|||  
AML|Acute myeloid leukaemia, no ICD-O subtype|C0023467|||C0023467|SNOMEDCT|||  
AML|Acute myeloid leukemia|C0023467;C2984331|||C0023467|OMIM;SNOMEDCT|||  
AML|Acute myeloid leukemia - category|C0023467|||C0023467|SNOMEDCT|||  
AML|Acute myeloid leukemia - category (morphologic  
abnormality)|||C0023467|SNOMEDCT|||  
AML|Acute myeloid leukemia, disease|C0023467|||C0023467|SNOMEDCT|||  
AML|Acute myeloid leukemia, disease (disorder)|||C0023467|SNOMEDCT|||  
AML|Acute myeloid leukemia, no ICD-O subtype|C0023467|||C0023467|SNOMEDCT|||  
AML|Acute myeloid leukemia, no ICD-O subtype (morphologic  
abnormality)|||C0023467|SNOMEDCT|||  
AML|Acute non-lymphocytic leukaemia|C0023467|||C0023467|SNOMEDCT|||  
AML|Acute non-lymphocytic leukemia|C0023467|||C0023467|SNOMEDCT|||

AML|Amlodipine|C0051696|||||1|0.0022|  
AML|Hematopoeitic - Acute Myelogenous Leukemia (AML)|||C0023467|NCI|||  
AML|LEUKEMIA ACUTE MYELOBLASTIC|C0023467|||C0023467|QMR|||  
AML|LEUKEMIA MYELOBLASTIC ACUTE|C0023467|||C0023467|CST|||  
AML|LEUKEMIA, ACUTE MYELOGENOUS|C0023467|||C0023467|OMIM|||  
AML|LEUKEMIA, ACUTE MYELOID|C0023467;C2984331|||C0023467|OMIM|||  
AML|LEUKEMIA, GRANULOCYTIC, ACUTE|C0023467|||C0023467|DXP|||  
AML|LEUKEMIA, MYELOBLASTIC, ACUTE|C0023467|||C0023467|DXP|||  
AML|LEUKEMIA, MYELOCYTIC, ACUTE|C0023467|||C0023467|DXP|||  
AML|LEUKEMIA, MYELOGENOUS, ACUTE|C0023467|||C0023467|DXP|||  
AML|LEUKEMIA, MYELOID, ACUTE|C0023467;C2984331|||C0023467|DXP|||  
AML|Leukemia, Acute Myeloblastic|C0023467|||C0023467|MSH|||  
AML|Leukemia, Acute Myelocytic|C0023467|||C0023467|MSH|||  
AML|Leukemia, Acute Myelogenous|C0023467|||C0023467|MSH|||  
AML|Leukemia, Acute Myeloid|C0023467;C2984331|||C0023467|MSH|||  
AML|Leukemia, Acute Nonlymphoblastic|C0023467|||C0023467|MSH|||  
AML|Leukemia, Acute Nonlymphocytic|C0023467|||C0023467|MSH|||  
AML|Leukemia, Myeloblastic, Acute|C0023467|||C0023467|MEDLINEPLUS;MSH;NDFRT|||  
AML|Leukemia, Myelocytic, Acute|C0023467|||C0023467|MSH;MTH;NDFRT|||  
AML|Leukemia, Myelogenous, Acute|C0023467|||C0023467|MEDLINEPLUS;MSH;NDFRT|||  
AML|Leukemia, Myeloid,  
Acute|C0023467;C2984331|||C0023467|MEDLINEPLUS;MSH;NDFRT|||  
AML|Leukemia, Myeloid, Acute [Disease/Finding]|||C0023467|NDFRT|||  
AML|Leukemia, Nonlymphoblastic, Acute|C0023467|||C0023467|MSH;NDFRT|||  
AML|Leukemia, Nonlymphocytic, Acute|C0023467|||C0023467|MSH;NDFRT|||  
AML|Leukemias, Acute Myeloblastic|C0023467|||C0023467|MSH|||  
AML|Leukemias, Acute Myelocytic|C0023467|||C0023467|MSH|||  
AML|Leukemias, Acute Myelogenous|C0023467|||C0023467|MSH|||  
AML|Leukemias, Acute Myeloid|C0023467|||C0023467|MSH|||  
AML|Leukemias, Acute Nonlymphoblastic|C0023467|||C0023467|MSH|||  
AML|Leukemias, Acute Nonlymphocytic|C0023467|||C0023467|MSH|||  
AML|Myeloblastic Leukemia, Acute|C0023467|||C0023467|MSH;NDFRT|||  
AML|Myeloblastic Leukemias, Acute|C0023467|||C0023467|MSH|||  
AML|Myelocytic Leukemia, Acute|C0023467|||C0023467|MSH;NDFRT|||  
AML|Myelocytic Leukemias, Acute|C0023467|||C0023467|MSH|||  
AML|Myelogenous Leukemia, Acute|C0023467|||C0023467|MSH;NDFRT|||  
AML|Myelogenous Leukemias, Acute|C0023467|||C0023467|MSH|||  
AML|Myeloid Leukemia, Acute|C0023467;C2984331|||C0023467|MSH;NDFRT|||  
AML|Myeloid Leukemias, Acute|C0023467|||C0023467|MSH|||  
AML|Myeloid leukemia, acute|C0023467;C2984331|||C0023467|ICD9CM|||  
AML|Nonlymphoblastic Leukemia, Acute|C0023467|||C0023467|MSH;NDFRT|||  
AML|Nonlymphoblastic Leukemias, Acute|C0023467|||C0023467|MSH|||  
AML|Nonlymphocytic Leukemia, Acute|C0023467|||C0023467|MSH;NDFRT|||  
AML|Nonlymphocytic Leukemias, Acute|C0023467|||C0023467|MSH|||  
AML|[M]Acute myeloid leukaemia|||C0023467|SNOMEDCT|||  
AML|[M]Acute myeloid leukaemia (disorder)|||C0023467|SNOMEDCT|||  
AML|[M]Acute myeloid leukemia|||C0023467|SNOMEDCT|||  
AML|acute granulocytic leukemia|C0023467|||C0023467|CHV;CSP|||  
AML|acute leukemias non lymphoblastic|||C0023467|CHV|||  
AML|acute monoblastic leukemia|C0023465;C0457334|||||1|  
AML|acute monocytic leukemia|C0023465;C1318544|||||1|  
AML|acute mucosal lesion|||||1|  
AML|acute myeloblastic|||||1|0.0024|  
AML|acute myeloblastic  
leukemia|C0023467|||C0023467|CHV;CSP;CST;MEDLINEPLUS;MSH;NCI;OMIM;SNOMEDCT|||1|  
AML|acute myelocytic leukaemia|C0023467|||C0023467|CHV|||

AML|acute myelocytic  
leukemia|C0023467|||C0023467|CHV;CSP;MSH;NCI;OMIM;SNOMEDCT|||1  
AML|acute myelogenous|||1|0.0014|  
AML|acute myelogenous leukaemia|C0023467|||C0023467|CHV|1|0.029|  
AML|acute myelogenous  
leukemia|C0023467|1|1.000|C0023467|CHV;COSTAR;CSP;MEDLINEPLUS;MSH;NCI;OMIM;SNOME  
DCT|1|0.2325|1  
AML|acute myelogenous leukemia (AML)|C0023467|||C0023467|CHV|||  
AML|acute myeloid|||1|0.0046|  
AML|acute myeloid leukaemia|C0023467;C2984331|||C0023467|CHV|1|0.1538|  
AML|acute myeloid  
leukemia|C0023467;C2984331|||C0023467;C2984331|CHV;CSP;MEDLINEPLUS;MSH;NCI;NDFRT  
;OMIM;PDQ;SNOMEDCT|1|0.5566|  
AML|acute myeloid leukemias|C0023467|||C0023467|CHV|||  
AML|acute myeloid leukemic|||1|0.0033|  
AML|acute non-lymphoblastic leukemia|C0023467|||C0023467|CHV|||  
AML|acute non-lymphocytic leukemia|C0023467|||C0023467|CHV|||  
AML|acute nonlymphoblastic leukemia|C0023467|||C0023467|CHV|||  
AML|acute nonlymphocytic leukemia|C0023467|||C0023467|CHV;CSP;NCI;PDQ|||  
AML|acute nonlymphocytic leukemia (ANLL)|C0023467|||C0023467|CHV|||  
AML|aml|C0023467|||C0023467|CHV|||  
AML|amlodipine|C0051696|||C0051696|CHV;CSP;LNC;MSH;MTHSPL;NCI;NDFRT;RXNORM;SNOME  
DCT;USPMG;VANDF|||  
AML|anatomic medullary locking|||1|0.0019|1  
AML|angiomyolipoma|C0206633|||C0206633|CHV;MSH;NCI;NDFRT;PDQ;SNOMEDCT|||1  
AML|anll|C0023467|||C0023467|CHV|||  
AML|anterior mitral  
leaflet|C0225950;C1305164|||C0225950;C1305164|FMA;SNOMEDCT;UWDA|1|0.0045|1  
AML|automated multitest laboratory|||1|  
AML|leukemia, acute myeloid|C0023467;C2984331|||C0023467|PDQ|||  
AML|leukemia, acute nonlymphocytic|C0023467|||C0023467|PDQ|||  
AML|non-lymphoblastic leukemia acute|||C0023467|CHV|||  
AML|renal angiomyolipoma|C0241961|||1|0.0079|  
AM|ACTIVATING TRANSCRIPTION FACTOR 7-INTERACTING  
PROTEIN|C1426677|||C1426677|OMIM|||  
AM|ADM|||C1412244|HUGO;OMIM|||  
AM|ADM gene|C1412244|||C1412244|HUGO;MTH|||  
AM|ADRENOMEDULLIN|C0215825;C1412244|||C1412244|OMIM|||  
AM|AM|||C0003798;C0332170;C1412244;C1426677|HL7V3.0;HUGO;NCI;OMIM|||  
AM|AM AG|||C0487769|LNC|||  
AM|AM antigen|||C0487769|MTH|||  
AM|ARM|C0446516;C1140618;C1269078;C1269612|||C0003798|NCI|||  
AM|ARMENIA|C0003798|||C0003798|NCI|||  
AM|ATF7-INTERACTING PROTEIN|C1426677|||C1426677|OMIM|||  
AM|ATF7IP|C1426677|||C1426677|HUGO;OMIM|||  
AM|ATF7IP gene|C1426677|||C1426677|HUGO;MTH|||  
AM|ATFA MODULATOR, MOUSE, HOMOLOG OF|||C1426677|OMIM|||  
AM|Am|||C0002467;C0487769|LNC;NCI|||  
AM|Am Ag|||C0487769|LNC|||  
AM|Am Antigen|||C0487769|LNC|||  
AM|Am element|||C0002467|CSP|||  
AM|Americium|C0002467|||C0002467|LCH;MSH;MTH;NCI;NDFRT;SNOMEDCT|||  
AM|Americium (substance)|||C0002467|SNOMEDCT|||  
AM|Americium [Chemical/Ingredient]|||C0002467|NDFRT|||  
AM|Americium, NOS|C0002467|||C0002467|SNOMEDCT|||  
AM|Americum, NOS|||C0002467|SNOMEDCT|||  
AM|Armenia|C0003798|||C0003798|AOD;LCH;MSH;MTH;NCI;SNOMEDCT|||

AM|Armenia (geographic location)||||C0003798|SNOMEDCT|||  
AM|Armenian S.S.R.|C0003798|||C0003798|MSH|||  
AM|Armenian SSR|C0003798|||C0003798|MSH|||  
AM|Astragalus membranaceus|C0949831||||1|0.0097|  
AM|Attometer|C2346872|||C2346872|MTH;NCI|||  
AM|Austin Moore||||||1  
AM|Autobiographical Memory|C0561843||||1|0.0023|  
AM|During morning|C0332170|||C0332170|SNOMEDCT|||  
AM|FLJ10688|C1426677|||C1426677|HUGO|||  
AM|In the morning|C0332170|||C0332170|SNOMEDCT|||  
AM|MBD1-CONTAINING CHROMATIN-ASSOCIATED FACTOR||||C1426677|OMIM|||  
AM|MCAF|C1337092;C1426677;C1522558;C1705079|||C1426677|OMIM|||  
AM|MCAF1|C1426677|||C1426677|OMIM|||  
AM|Morning|C0332170|||C0332170|MTH;NCI;SNOMEDCT|||  
AM|Morning (qualifier value)||||C0332170|SNOMEDCT|||  
AM|Sinusoidally amplitude-modulated||||1|0.0037|  
AM|acetoxymethyl||||1|0.0074|  
AM|acetoxymethyl ester||||1|0.0094|  
AM|acrylamide|C0050587||||1|0.0047|1  
AM|activating transcription factor 7 interacting protein|C1426677|||C1426677|HUGO|||  
AM|actomyosin|C0001291;C1325607||||1|0.0043|1  
AM|acute myelofibrosis|C0334674||||1|1  
AM|adhesion molecules||||1|0.007|  
AM|adrenal medulla|C0001629||||1|0.0084|  
AM|adrenomedullin|C0215825;C1412244|||C1412244|HUGO|1|0.1924|1  
AM|adriamycin|C0085752||||1|0.0097|  
AM|adult male||||||1  
AM|adult monocyte||||||1  
AM|aerosol mask||||||1  
AM|aerospace medicine|C0001713;C1555853||||||1  
AM|akineti mutism|C0001889||||||1  
AM|alternative medicine|C0002346||||1|0.0037|1  
AM|alveolar|C1440080||||1|0.0033|  
AM|alveolar macrophage|C0085236|||C0085236|CHV;CSP;FMA;MSH;NCI;SNOMEDCT|||1  
AM|alveolar macrophages|C0085236||||1|0.4788|  
AM|alveolar mucosa||||||1  
AM|am|||C2346872|NCI|||  
AM|am - ante meridiem|||C0332170|SNOMEDCT|||  
AM|amacrine cell|C0229216||||||1  
AM|amalgam|C0440138;C0580619||||||1  
AM|ambulatory monitoring|C0242882||||1|0.0027|  
AM|americium|C0002467|||C0002467|AOD;CSP|||1  
AM|ametropia|C1527310||||||1  
AM|aminopyrine|C0002586||||1|0.0033|  
AM|amiodarone|C0002598||||1|0.018|  
AM|ammeter||||||1  
AM|amnion|C0002630||||||1  
AM|amniotic membrane|C0002630;C1305379||||1|0.0214|  
AM|amphetamine|C0002658;C0002667||||1|0.0104|  
AM|ampicillin|C0002680||||1|0.005|  
AM|amplitude|C2346753||||||1  
AM|amplitude modulated||||1|0.0097|  
AM|amplitude modulation||||1|0.0277|1  
AM|amygdala|C0002708||||1|0.0321|  
AM|amygdaloid||||1|0.0057|  
AM|amyl||||||1

AM|amylase|C0002712|||||1|0.004|  
AM|anovular menstruation|C0404557|||||1  
AM|ante meridiem|C0332170|||C0332170|SNOMEDCT|||  
AM|anterior midpapillary|||||1  
AM|anteromeatal|||||1  
AM|anteromedial|C1179847|||||1|0.007|  
AM|anteromedial nucleus|C0228319|||||1|0.0023|  
AM|antimycotic|||||1  
AM|apparent motion|||||1|0.007|  
AM|arabinomannan|C0052278|||||1  
AM|arbuscular mycorrhiza|||||1|0.004|  
AM|arbuscular mycorrhizal|||||1|0.0551|  
AM|arithmetic mean|||||1|0.0033|1  
AM|armenia|C0003798|||C0003798|CHV|||  
AM|arousal mechanism|||||1  
AM|artemether|C0052429|||||1|0.003|  
AM|arterial malformation|C0151489|||||1  
AM|arterial mean|||||1  
AM|articulation manipulation|||||1  
AM|aseptic meningitis|C0025290|||||1|0.0084|  
AM|aseptic meningo-encephalitis|||||1|0.0027|  
AM|aseptic meningoencephalitis|||||1|0.004|  
AM|atrial myxoma|C0151241|||||1  
AM|attitude to medication|||||1  
AM|aviation medicine|C0004431|||||1  
AM|axiomesial|||||1  
AM|before noon||1|0.980|||||1  
AM|in the morning|C0332170|||C0332170|CHV|||  
AM|mane|C0222048;C0332170|||C0332170|SNOMEDCT|||  
AM|meter angle|||||1  
AM|mixed astigmatism|||||1  
AM|morning|C0332170|||C0332170|AOD;CHV|1|0.0184|  
AM|myopic astigmatism|||||1  
AM|om - omni mane|C0332170|||C0332170|SNOMEDCT|||  
AM|p621|C1426677|||C1426677|HUGO|||  
ANA|ABUNDANT IN NEUROEPITHELIUM AREA|C1412840|||C1412840|OMIM|||  
ANA|ANA|||C0002463;C0003243;C0702121;C1412840|CST;HUGO;MSH;NCI;OMIM;SNOMEDCT|||  
ANA|ANA - Anti-nuclear antibody|C0003243|||C0003243|SNOMEDCT|||  
ANA|ANF|||C0003243|SNOMEDCT|||  
ANA|ANF - Anti-nuclear factor|C0003243|||C0003243|SNOMEDCT|||  
ANA|American Nurses Association|C0002463|||C0002463|CHV;MSH|1|0.0558|  
ANA|American Nurses' Association|C0002463|||C0002463|MSH;MTH|||  
ANA|American Nurses' Associations|||C0002463|MSH|||  
ANA|American association nurse|C0002463|||C0002463|CHV|||  
ANA|American association nurses|||C0002463|CHV|||  
ANA|American nurse association|C0002463|||C0002463|CHV|||  
ANA|American nurses' association|C0002463|||C0002463|CHV|||  
ANA|Ana|||C1882141|NCI|||  
ANA|Anti nuclear factor|||C0003243|SNOMEDCT|||  
ANA|Anti-nuclear antibodies|||||1|0.0829|  
ANA|Anti-nuclear antibody|C0003243|||C0003243|SNOMEDCT|||  
ANA|Anti-nuclear factor|||C0003243|SNOMEDCT|||  
ANA|Antibodies, Antinuclear|C0003243;C0702121|||C0003243|MSH;MTH;NDFRT|||  
ANA|Antibodies, Antinuclear [Chemical/Ingredient]|||C0003243|NDFRT|||  
ANA|Antibody, Antinuclear|C0003243|||C0003243|MSH|||  
ANA|Antinuclear  
Antibodies|C0003243;C0702121|||C0003243;C0702121|MSH;NCI;NDFRT|||

ANA|Antinuclear Antibody|C0003243|||C0003243|MSH;NCI;NDFRT|||  
ANA|Antinuclear Antibody Assay|C0702121|||C0702121|MTH|||  
ANA|Antinuclear Antibody Measurement|C0702121|||C0702121|NCI|||  
ANA|Antinuclear Autoantibody|C0003243|||C0003243|NCI|||  
ANA|Antinuclear Factor|C0003243|||C0003243|MSH;NDFRT|||  
ANA|Antinuclear Factors|C0003243|||C0003243|MSH;NDFRT|||  
ANA|Antinuclear antibodies|C0003243;C0702121|||1|0.7644|  
ANA|Antinuclear antibody|C0003243|||C0003243|SNOMEDCT|||  
ANA|Antinuclear antibody (substance)|||C0003243|SNOMEDCT|||  
ANA|Antinuclear factor|C0003243|||C0003243|SNOMEDCT|||  
ANA|Association, American Nurses'|C0002463|||C0002463|MSH|||  
ANA|Associations, American Nurses' |||C0002463|MSH|||  
ANA|B-CELL TRANSLOCATION GENE 3|C1412840|||C1412840|OMIM|||  
ANA|BTG family, member 3|C1412840|||C1412840|HUGO|||  
ANA|BTG3|C1412840|||C1412840|HUGO;OMIM|||  
ANA|BTG3 gene|C1412840|||C1412840|HUGO;MTH|||  
ANA|Factor, Antinuclear|C0003243|||C0003243|MSH|||  
ANA|Factors, Antinuclear|C0003243|||C0003243|MSH|||  
ANA|Nurses' Association, American|C0002463|||C0002463|MSH|||  
ANA|Nurses' Associations, American|||C0002463|MSH|||  
ANA|Of Each|C1882141|||C1882141|MTH;NCI|||  
ANA|TOB5|C1412840|||C1412840|OMIM|||  
ANA|aa|C1235746|||C1882141|NCI|||  
ANA|acetylneuraminic acid|||1|  
ANA|ana|||C0003243|CHV|||  
ANA|anandamide|C0211726|||1|0.0156|  
ANA|anesthesia|C0002903;C0002930;C0278134|||1|  
ANA|anesthetic|C0002932|||1|  
ANA|anti-nuclear|||1|0.0164|  
ANA|anti-nuclear antibody|C0003243|||C0003243|CHV|||  
ANA|antiDNA autoantibody|C0003243|||C0003243|CSP|||  
ANA|antinuclear|||1|0.0361|  
ANA|antinuclear antibodies|C0003243;C0702121|||C0003243|CHV|||  
ANA|antinuclear  
antibody|C0003243|1|1.000|C0003243|CHV;CSP;MSH;NCI;NDFRT;SNOMEDCT|||1|  
ANA|antinuclear antibody (ANA)|C0003243|||C0003243|CHV|||  
ANA|antinuclear antibody (ANA) test|||C0702121|CHV|||  
ANA|antinuclear antibody ana|C0003243|||C0003243|CHV|||  
ANA|antinuclear autoantibodies|||1|0.0123|  
ANA|antinuclear autoantibody|C0003243|||C0003243|CSP|||  
ANA|antinuclear factor|C0003243|||C0003243|CHV;CSP|||  
ANA|antinuclear factors|C0003243|||C0003243|CHV|||  
ANA|aortic nerve activity|||1|0.0057|  
ANA|articular/nonarticular|||1|  
ANA|aspartyl naphthylamide|||1|  
ANA|nuclear antigens|C0069115|||1|0.0107|  
ANA|tob55|C1412840;C1826973|||C1412840|HUGO|||  
ANCA|ANCA|C0103647|||C0103647|MSH;NDFRT;SNOMEDCT|||  
ANCA|ANCA - Anti-neutrophil cytoplasmic antibody|C0103647|||C0103647|SNOMEDCT|||  
ANCA|Anti Neutrophil Cytoplasmic Antibodies|C0103647|||C0103647|MSH|||  
ANCA|Anti Neutrophil Cytoplasmic Antibody|C0103647|||C0103647|MSH|||  
ANCA|Anti neutrophilic cytoplasm antibody|C0103647|||C0103647|SNOMEDCT|||  
ANCA|Anti neutrophilic cytoplasm antibody (substance)|||C0103647|SNOMEDCT|||  
ANCA|Anti-Neutrophil Cytoplasmic Antibodies|C0103647|||C0103647|MSH;NDFRT|||  
ANCA|Anti-Neutrophil Cytoplasmic  
Antibody|C0103647|||C0103647|MSH;NDFRT|1|0.0823|  
ANCA|Anti-neutrophil cytoplasmic antibody|C0103647|||C0103647|SNOMEDCT|||

ANCA|Antibodies, Anti-Neutrophil Cytoplasmic|C0103647|||C0103647|MSH|||  
ANCA|Antibodies, Antineutrophil Cytoplasmic|C0103647|||C0103647|MSH;NDFRT|||  
ANCA|Antibodies, Antineutrophil Cytoplasmic  
[Chemical/Ingredient]|||C0103647|NDFRT|||  
ANCA|Antibody, Anti-Neutrophil Cytoplasmic|C0103647|||C0103647|MSH|||  
ANCA|Antibody, Antineutrophil Cytoplasmic|C0103647|||C0103647|MSH|||  
ANCA|Antineutrophil Cytoplasmic Antibodies|C0103647|||C0103647|MSH;MTH;NDFRT|||  
ANCA|Antineutrophil Cytoplasmic Antibody|C0103647|||C0103647|MSH;NDFRT|||  
ANCA|Antineutrophil cytoplasmic autoantibodies|||1|0.1509|  
ANCA|Cytoplasmic Antibodies, Anti-Neutrophil|C0103647|||C0103647|MSH|||  
ANCA|Cytoplasmic Antibodies, Antineutrophil|C0103647|||C0103647|MSH|||  
ANCA|Cytoplasmic Antibody, Anti-Neutrophil|C0103647|||C0103647|MSH|||  
ANCA|Cytoplasmic Antibody, Antineutrophil|C0103647|||C0103647|MSH|||  
ANCA|Neutrophil cytoplasmic Ab|C0103647|||C0103647|LNC|||  
ANCA|Neutrophil cytoplasmic Antibody|C0103647|||C0103647|LNC|||  
ANCA|Neutrophil cytoplasmic antibody|C0103647|||C0103647|SNOMEDCT|||  
ANCA|anca|C0103647|||C0103647|CHV|||  
ANCA|anti-neutrophil cytoplasm autoantibodies|||1|0.0257|  
ANCA|antineutrophil cytoplasm autoantibodies|||1|0.0154|  
ANCA|antineutrophil cytoplasmic antibodies|C0103647|||1|0.6535|  
ANCA|antineutrophil cytoplasmic antibody|C0103647|1|1.000|C0103647|MSH;NDFRT|||1  
ANCA|antineutrophil cytoplasmic antibody (ANCA)|C0103647|||C0103647|CHV|||  
ANCA|cytoplasmic auto-antibodies|||1|0.0103|  
ANCA|neutrophil cytoplasmic antigens|||1|0.0463|  
ANCA|neutrophils|C0027950;C0948762|||1|0.0154|  
ANC|ANC|C0948762|||C0948762|NCI|||  
ANC|Absolute Neutrophil Count|C0948762|||C0948762|NCI|||  
ANC|Absolute neutrophil count|C0948762|||C0948762|MTH|||  
ANC|Active noise control|||1|0.0199|  
ANC|NEUT|C0027944;C0948762|||C0948762|NCI|||  
ANC|Neutrophils|C0027950;C0948762|||C0948762|NCI|||  
ANC|absolute count neutrophils|C0948762|||C0948762|CHV|||  
ANC|absolute neutrophil count|C0948762|1|1.000|C0948762|CHV;MTH;NCI|1|0.7669|1  
ANC|acid neutralization capacity|||1|  
ANC|acid neutralizing capacity|||1|0.0359|  
ANC|adult neuronal ceroid|||1|  
ANC|antenatal care|C0033052|||C0033052|CHV;SNOMEDCT|1|0.0916|  
ANC|antenatal clinic|C1274027|||1|0.0857|  
AP|2-aminopurine|C0000263|||1|0.0033|  
AP|ABSOLUTE PITCH|C1834650|||C1834650|OMIM|||  
AP|ALKALINE PHOSPHATASE|C0002059;C1318717|||C0002059|SPN|||  
AP|ALP - Alkaline phosphatase|C0002059|||C0002059|SNOMEDCT|||  
AP|AP|||C0002059;C0179108;C0279212;C0332142;C1834650;C1879722;C1999039|LNC;NCI;  
OMIM;PDQ;SNOMEDCT|||  
AP|AP - Alkaline phosphatase|C0002059|||C0002059|SNOMEDCT|||  
AP|AP diagnosis|C0332142|||C0332142|SNOMEDCT|||  
AP|APPLICATOR|C0179108;C1705092|||C0179108;C1879722|NCI;VANDF|||  
AP|APPLICATORS|C0179108|||C0179108|NDFRT;VANDF|||  
AP|Abasic|||1|0.0102|  
AP|Absolute pitch|C1834650|||1|0.003|  
AP|Actinic prurigo|C0406217|||1|0.0029|  
AP|Actinobacillus pleuropneumoniae|C0085489|||1|0.0015|  
AP|Alkaline Phosphatase|C0002059;C1318717|||C0002059|MSH;MTH;NCI;NDFRT|||  
AP|Alkaline Phosphatase [Chemical/Ingredient]|||C0002059|NDFRT|||  
AP|Alkaline phosphatase|C0002059;C1318717|||C0002059|LCH;LNC;SNOMEDCT|||  
AP|Alkaline phosphatase (substance)|||C0002059|SNOMEDCT|||  
AP|Alkaline phosphomonoesterase|C0002059|||C0002059|SNOMEDCT|||

AP|Allopregnanolone|C0376202|||||1|0.0018|  
AP|Allopurinol|C0002144|||||1|0.0027|  
AP|Annular pancreas|C0149955|||||1|0.0008|  
AP|Anterior Pagoda|||||1|0.0032|  
AP|Anterior-Posterior|C1999039|||C1999039|MTH|||  
AP|Antiplasmin|C0003410|||||1|0.0014|  
AP|Applicator|C0179108;C1705092|||C0179108;C1879722|HL7V2.5;NCI;SNOMEDCT|||  
AP|Applicator (physical object)|||C0179108|SNOMEDCT|||  
AP|Applicator - device|C0179108|||C0179108|MTH|||  
AP|Applicator Dosing Unit|C1879722|||C1879722|MTH;NCI|||  
AP|CDDP/DOX||||C0279212|NCI;PDQ|||  
AP|Cisplatin/Doxorubicin||||C0279212|NCI|||  
AP|Glycerophosphatase|C0002059|||C0002059|SNOMEDCT|||  
AP|MUSICAL PERFECT PITCH|C1834650|||C1834650|MTH;OMIM|||  
AP|Orthophosphoric-monoester phosphohydrolase (alkaline optimum)|||C0002059|MSH;NDFRT|||  
AP|Pathology diagnosis|C0332142|||C0332142|MTH;SNOMEDCT|||  
AP|Pathology diagnosis (contextual qualifier)|||C0332142|SNOMEDCT|||  
AP|Pathology diagnosis (contextual qualifier) (qualifier value)|||C0332142|SNOMEDCT|||  
AP|Phosphomonoesterase|C0002059;C0031678|||C0002059|SNOMEDCT|||  
AP|Pseudomonas aeruginosa alkaline protease|||||1|0.0009|  
AP|[14C]aminopyrine|||||1|0.0047|  
AP|abdominal  
pain|C0000737|||C0000737|AOD;CCS;CHV;COSTAR;CST;DXP;ICD9CM;LNC;MEDLINEPLUS;MSH;MTH;NCI;NDFRT;OMIM;SNOMEDCT|||1  
AP|abdominal pressure|C0429218|||||1|  
AP|abdominoperineal|C0442411|1|0.008|||||1  
AP|absolute power|||||1|0.0011|  
AP|accelerated phase|C0457345|||||1|0.0092|1  
AP|accessory  
pathway|C0006383;C0264897|||C0006383;C0264897|CHV;SNOMEDCT|1|0.0177|1  
AP|accessory processes|||||1|0.0009|  
AP|accounts payable|C0000939|||C0000939|MSH|||  
AP|accumulation of 14C-aminopyrine|||||1|0.0008|  
AP|acellular pertussis|C0982332|||||1|0.0027|  
AP|acetaminophen|C0000970;C2917659|||||1|0.0015|  
AP|acid  
phosphatase|C0001109|||C0001109;C0201834|CHV;CSP;LCH;LNC;MSH;MTH;NCI;NDFRT;SNOMEDCT|1|0.0312|1  
AP|acinar parenchyma|||||1|  
AP|action potential|C0001272|||C0001272|AOD;CHV;CSP;MSH|1|0.1356|1  
AP|activation peptide|||||1|0.0014|  
AP|activator protein|||||1|  
AP|active pepsin|||||1|  
AP|active pressure|||||1|  
AP|acupuncture|C0001299;C0394664|||||1|0.0029|  
AP|acute  
pancreatitis|C0001339|||C0001339|AOD;CCS;CHV;COSTAR;ICD9CM;MTHMST;NCI;SNOMEDCT|1|0.0637|1  
AP|acute phase|C0439557|||C0439557|CHV;SNOMEDCT|1|0.005|1  
AP|acute pneumonia|C0740766|||C0740766|CHV;NCI|1|0.0033|1  
AP|acute proliferative|||||1|  
AP|adaptor protein|C1135629|||||1|0.0047|  
AP|adductor pollicis|C0224288;C1305009|1|0.002|||1|0.0045|1  
AP|adenomatous polyp|C0206677|||||1|  
AP|adenomatous polyposis|C0032580|||C0032580|CHV;SNOMEDCT|||1

AP|adolescent psychiatry|C0001583|||||1  
AP|adult periodontitis|C0266929||||1|0.0219|  
AP|advance placement||1|0.002||||  
AP|aerosolized pentamidine|||||1|0.0044|  
AP|after parturition|||||1  
AP|after polarization|||||1  
AP|alkaline  
phosphatase|C0002059;C1318717|||C0002059;C0201850;C1318717;C1561546|CHV;CSP;LCH;  
LNC;MSH;MTH;NCI;NDFRT;SNOMEDCT;SPN|1|0.1961|1  
AP|alkaline phosphatase (ALP)|C0002059;C1318717|||C0002059|CHV|||  
AP|alkaline phosphatase activity|C1149888||||1|0.0039|  
AP|alkaline phosphatases|C0002059|||C0002059|AOD;CHV|||  
AP|alkaline phosphate|||||1|0.0009|  
AP|alkaline phosphomonoesterase|C0002059|||C0002059|CSP|||  
AP|alpha 2-antiplasmin|C0003410;C1418648||||1|0.0021|  
AP|alternative pathway|||||1|0.0092|  
AP|alum-precipitated|||||1  
AP|alveolar permeability|||||1|0.0011|1  
AP|aminopeptidase|C0002570|||C0002570|CSP;LNC;MTH;SNOMEDCT|1|0.0068|1  
AP|aminopurine|C0000263|||C0000263|CHV;CSP|||  
AP|aminopyrine|C0002586||||1|0.0063|  
AP|ammonium perchlorate|C0103081||||1|0.0018|  
AP|ampicillin|C0002680||||1|0.0066|  
AP|amyloid P|C0002721;C2825878||||1|0.0017|  
AP|amyloid P component|C0002721||||1|0.0081|  
AP|amyloid P-component|C0002721|||||1  
AP|amyloid peptide|||||1  
AP|amyloid plaques|C0333463;C2936349||||1|0.0008|  
AP|anaphylactoid purpura|C0034152||||1|0.0018|  
AP|anatomic profile|||||1  
AP|angina  
pectoris|C0002962|||C0002962|AOD;CCS;CHV;COSTAR;CSP;CST;DXP;ICD9CM;ICPC;LCH;MSH;  
MTH;NCI;NDFRT;OMIM;QMR;SNOMEDCT|1|0.023|1  
AP|antepartum|C0456336|||C0456336|CHV;NCI;SNOMEDCT|||1  
AP|anterior and posterior||1|0.968||||1  
AP|anterior pituitary|C0032016|||C0032016|CHV;NDFRT;VANDF|1|0.0478|1  
AP|anterior pituitary gland|C0032008||||1|0.0044|  
AP|anterior posterior|C1999039|||C1999039|CHV|||  
AP|anterior to posterior|||||1|0.0008|  
AP|anterior-posterior|C1999039|||C1999039|CHV|||  
AP|anterior/posterior|C1999039||||1|0.0015|  
AP|antero-posterior|||||1|0.0158|  
AP|anteroposterior|||||1|0.0758|1  
AP|antidromic potential|||||1  
AP|antigen presentation|C0206431||||1|0.0015|  
AP|antiparkinsonian|C0003405|||||1  
AP|antiplasmin|C0003410|||||1  
AP|antipsychotic|C0040615||||1|0.0015|  
AP|antipyrene|C0003420|||C0003420|AOD;CHV;CSP;LCH;LNC;MSH;MTH;MTHSPL;NCI;NDFRT;R  
XNORM;SNOMEDCT;VANDF|1|0.0117|  
AP|antiviral protein|||||1  
AP|antral peristalsis|||||1  
AP|aortic pressure|C0456180|||C0456180|CHV;SNOMEDCT|||1  
AP|aortic pulmonary||1|0.020||||1  
AP|aortopulmonary|||||1  
AP|apatite|C0003522||||1|0.0017|  
AP|apex|C1522410|||||1

AP|apical pulse|||||||1  
AP|apomorphine|C0003596|||||1|0.0027|  
AP|apothecary|||||||1  
AP|appendectomy|C0003611|||C0003611|AOD;CCS;CHV;COSTAR;ICD9CM;LCH;MSH;MTH;NCI;SNOMEDCT|||1  
AP|appendiceal perforation|||||||1  
AP|appendicitis|C0003615;C0085693|||C0003615;C0085693|AOD;CHV;COSTAR;ICD9CM;ICPC;LCH;MEDLINEPLUS;MSH;MTH;NCI;NDFRT;SNOMEDCT|||1  
AP|appendix|C0003617;C1269000|||C0003617;C1269000;C1552860|AOD;CHV;CSP;FMA;HL7V2.5;HL7V3.0;LNC;MSH;MTH;NCI;SNOMEDCT;UWDA|||1  
AP|applicator|C0179108;C1705092|||C0179108|CHV|||  
AP|applicators|C0179108|||C0179108|CHV|||  
AP|aprotinin|C0003641|||||1|0.0023|  
AP|aps diagnosis|C0332142|||C0332142|CHV|||  
AP|apterous|||||1|0.0044|  
AP|apurinic|||||1|0.0051|  
AP|apurinic acid|C0003651|||C0003651|MSH;NDFRT|||  
AP|apurinic/apyrimidinic|||||1|0.0387|  
AP|area  
postrema|C0228530;C1289468|||C0228530;C1289468|CSP;FMA;MSH;SNOMEDCT|1|0.0478|1  
AP|arithmetic progression|||||||1  
AP|arterial|C0003842;C0221464|||||1|0.0014|  
AP|arterial blood pressure|C1272641|||||1|0.0108|  
AP|arterial  
pressure|C0232108;C1272641|||C0232108;C1272641|CHV;SNOMEDCT|1|0.0838|1  
AP|arteriosclerotic plaque|||||||1  
AP|artificial perilymph|||||1|0.002|  
AP|artificial pneumothorax|C0032328|||C0032328|AOD;MSH;SNOMEDCT|||1  
AP|ascorbyl palmitate|C0049690|||||1|0.0014|  
AP|aspiration  
pneumonia|C0032290|||C0032290|CHV;COSTAR;CST;LCH;MSH;MTH;NCI;NDFRT;OMIM;QMR;SNOMEDCT|||  
AP|aspiration pneumonitis|C0032290;C1761609|||||||1  
AP|assessment and plan|||||||1  
AP|association period|||||||1  
AP|asthmatic patients|||||1|0.0012|  
AP|atherosclerotic plaque|C2936350|||C2936350|CHV;CSP;MSH;NCI;NDFRT|||1  
AP|atrial pacing|||||1|0.0042|1  
AP|atrioepetin|C0027481;C0201900|||||1|0.0045|  
AP|atrioventricular pathway|||||||1  
AP|atrium pace|||||||1  
AP|attending physician|C1320929|||||||1  
AP|autologous plasma|||||1|0.0009|  
AP|available P|||||1|0.003|  
AP|available phosphorus|||||1|0.0023|  
AP|average power|||||1|0.0017|  
AP|axiopulpal|||||||1  
AP|cisplatin/doxorubicin|||C0279212|PDQ|||  
AP|cisplatin/doxorubicin protocol|||C0279212|MTH|||  
AP|glycerophosphatase|C0002059|||C0002059|CSP|||  
AP|pathology diagnosis|C0332142|||C0332142|CHV|||  
AP|phosphomonoesterase|C0002059;C0031678|||C0002059|CHV|||  
AP|posterior anterior|C1999039|||C1999039|CHV|||  
AP|proteinase|C0030946;C1622131;C1947941|||||1|0.0014|  
AQ|AMERICAN SAMOA|C0242536|||C0242536|NCI|||  
AQ|ANTARCTICA|C0454691|||C0454691|NCI|||  
AQ|AQ|||C0242536;C0454691;C1705414|NCI|||

AQ|AQ Term Type|C1705414|||C1705414|MTH;NCI|||  
AQ|AS|||C0242536|NCI|||  
AQ|ASM|||C0242536|NCI|||  
AQ|ATA|||C0454691|NCI|||  
AQ|AY|||C0454691|NCI|||  
AQ|Acoustic quantification|||1|0.1837|  
AQ|Aggression Questionnaire|||1|0.0476|  
AQ|American Samoa|C0242536|||C0242536|AOD;MSH;MTH;NCI|||  
AQ|Antarctic Regions|C0454691|||C0454691|MSH|||  
AQ|Antarctic region|C0454691|||C0454691|AOD|||  
AQ|Antarctic regions|C0454691|||C0454691|LCH|||  
AQ|Antarctica|C0454691|||C0454691|MTH;NCI;SNOMEDCT|||  
AQ|Antarctica (geographic location)|||C0454691|SNOMEDCT|||  
AQ|Eastern Samoa|C0242536|||C0242536|MSH|||  
AQ|Quotient|C2347741|||1|0.1361|  
AQ|accomplishment quotient|||1|  
AQ|achievement quotient|||1|  
AQ|acoustic quantification|||1|  
AQ|amodiaquine|C0002641|||1|0.3605|  
AQ|antarctica|C0454691|||C0454691|CHV|||  
AQ|anthraquinone|C0003174;C0050133;C0303858|||1|0.1156|  
AQ|anxiety quotient|||1|  
AQ|any quantity|||1|  
AQ|aphasia quotient|||1|  
AQ|aqueous|C0599956|1|0.998||1|0.0612|1  
AQ|areca quid|||1|0.0952|  
ARB|\*Arbitrary|C1264693|||C1264693|HL7V2.5|||  
ARB|ARB|||C0521942;C1264693;C2678493|NCI;OMIM;SNOMEDCT|||  
ARB|Angiotensin 2 Receptor Blocker|C0521942|||C0521942|NDFRT|||  
ARB|Angiotensin 2 Receptor Blocker [EPC]|C0521942|||C0521942|NDFRT|||  
ARB|Angiotensin II Receptor Antagonist|C0521942|||C0521942|NCI|||  
ARB|Angiotensin II Receptor  
Antagonists|C0521942;C2757003|||C0521942|MSH;NCI;USPMG|||  
ARB|Angiotensin II Receptor Blocker|C0521942|||C0521942|NCI;NDFRT|||  
ARB|Angiotensin II Receptor Blockers|C0521942;C2757003|||C0521942|MSH|||  
ARB|Angiotensin II receptor antagonist|C0521942|||C0521942|MTH;SNOMEDCT|||  
ARB|Angiotensin II receptor antagonist (product)|||C0521942|SNOMEDCT|||  
ARB|Angiotensin II receptor antagonist (substance)|||C0521942|SNOMEDCT|||  
ARB|Angiotensin II receptor antagonist, NOS|C0521942|||C0521942|SNOMEDCT|||  
ARB|Angiotensin Receptor Blockers|C0521942;C0815017|||C0521942|NCI|||  
ARB|Arb|||C1264693|LNC|||  
ARB|Arbitrary|C1264693|||C1264693|NCI;SNOMEDCT|||  
ARB|Arbitrary (property)|||C1264693|SNOMEDCT|||  
ARB|Arbitrary (property) (qualifier value)|C1264693|||C1264693|MTH;SNOMEDCT|||  
ARB|BESTROPHINOPATHY|C2678493|||C2678493|MTH;OMIM|||  
ARB|adrenergic receptor binder|||1|  
ARB|angiotensin II receptor blocker|C0521942|||1|0.6667|  
ARB|angiotensin II type 1 receptor blocker|||1|0.2444|  
ARB|angiotensin receptor blocker||1|1.000|||1|  
ARB|antibiotic-resistant bacteria|||1|  
ARB|any reliable brand|||1|  
ARB|arbitrary|C1264693|||C1264693|CHV|||1  
ARB|receptor blockade|||1|0.0889|  
ARDS|ADULT RESPIRATORY DISTRESS SYNDROME|C0035222|||C0035222|CST;DXP;NCI|||  
ARDS|ADULT RESPIRATORY DISTRESS SYNDROME, ARDS|C0035222|||C0035222|NCI|||  
ARDS|ARDS|C0035222|||C0035222|CSP;CST;DXP;MEDLINEPLUS;NCI;SNOMEDCT|||  
ARDS|ARDS - Adult respiratory distress syndrome|C0035222|||C0035222|SNOMEDCT|||

ARDS|ARDS, Human|C0035222||C0035222|MSH;NDFRT|||  
ARDS|ARDSs, Human|C0035222||C0035222|MSH|||  
ARDS|Acquired respiratory distress syndrome|C0035222||C0035222|SNOMEDCT|||  
ARDS|Acute Respiratory Distress Syndrome|C0035222||C0035222|MSH;NCI;NDFRT|||  
ARDS|Adult RDS|C0035222||C0035222|NCI|||  
ARDS|Adult Respiratory Distress Syndrome|C0035222||C0035222|COSTAR;MSH;NCI;NDFRT|||  
ARDS|Adult hyaline membrane disease|C0035222||C0035222|SNOMEDCT|||  
ARDS|Adult respiratory distress syndrome|C0035222||C0035222|MTHICD9;NCI;SNOMEDCT|1|0.9883|  
ARDS|Adult respiratory distress syndrome (disorder)|||C0035222|SNOMEDCT|||  
ARDS|Adult respiratory distress syndrome, NOS|C0035222||C0035222|SNOMEDCT|||  
ARDS|Congestive atelectasis|C0035222;C0205938||C0035222|SNOMEDCT|||  
ARDS|DISTRESS RESPIRATORY SYNDROME ADULTS|||C0035222|CST|||  
ARDS|DaNang lung|C0035222||C0035222|SNOMEDCT|||  
ARDS|Human ARDS|C0035222||C0035222|MSH|||  
ARDS|Lung, Shock|C0035222||C0035222|MSH|||  
ARDS|Non-cardiogenic pulmonary edema|C0035222||C0035222|SNOMEDCT|||  
ARDS|Non-cardiogenic pulmonary edema (disorder)|||C0035222|SNOMEDCT|||  
ARDS|Non-cardiogenic pulmonary oedema|C0035222||C0035222|SNOMEDCT|||  
ARDS|Pulmonary capillary leak syndrome|C0035222||C0035222|SNOMEDCT|||  
ARDS|RESPIRATORY DISTRESS SYNDROME ADULT|C0035222||C0035222|CST|||  
ARDS|RESPIRATORY DISTRESS SYNDROME, ADULT|C0035222||C0035222|DXP|||  
ARDS|Resp. distress synd. - adult|C0001675;C1706450||C0035222|SNOMEDCT|||  
ARDS|Respirat distress synd-adult|||C0035222|SNOMEDCT|||  
ARDS|Respiratory Distress Syndrome, Acute|C0035222||C0035222|MSH;NDFRT|||  
ARDS|Respiratory Distress Syndrome, Adult|C0035222||C0035222|MSH;MTH;NDFRT|||  
ARDS|Respiratory Distress Syndrome, Adult [Disease/Finding]|||C0035222|NDFRT|||  
ARDS|Respiratory distress syndrome, Adult|C0035222||C0035222|LCH|||  
ARDS|SHOCK LUNG|C0035222||C0035222|DXP|||  
ARDS|SYNDROME ADULT RESPIRATORY|||C0035222|CST|||  
ARDS|SYNDROME ADULT RESPIRATORY DISTRESS|C0035222||C0035222|CST|||  
ARDS|SYNDROME RESPIRATORY DISTRESS ADULT|C0035222||C0035222|CST|||  
ARDS|Shock Lung|C0035222||C0035222|MSH;NDFRT|||  
ARDS|Shock lung|C0035222||C0035222|SNOMEDCT|||  
ARDS|Vietnam lung|C0035222||C0035222|SNOMEDCT|||  
ARDS|WET LUNG SYNDROME|C0035222;C0158940||C0035222|DXP|||  
ARDS|a r d s|C0035222||C0035222|CHV|||  
ARDS|a.r.d.s.|C0035222||C0035222|CHV|||  
ARDS|acute respiratory distress syndrome|C0035222|1|1.000|||1|  
ARDS|acute respiratory failure|C0264490|||1|0.0073|  
ARDS|adult hyaline membrane disease|C0035222||C0035222|CHV|||  
ARDS|adult rds|C0035222||C0035222|CHV|||  
ARDS|adult respiratory distress syndrome|C0035222||C0035222|AOD;CSP|||  
ARDS|adult respiratory distress syndrome (ARDS)|C0035222||C0035222|CHV|||  
ARDS|adult respiratory syndrome|C0035222||C0035222|CHV|||  
ARDS|ards|C0035222||C0035222|CHV|||  
ARDS|danang lung|C0035222||C0035222|CHV|||  
ARDS|lung failure|||1|0.0044|  
ARDS|non-cardiogenic pulmonary edema|C0035222||C0035222|CHV|||  
ARDS|shock lung|C0035222||C0035222|CHV;CSP|||  
ARDS|wet lung|C0034063;C0035222||C0035222|CHV;CSP|||  
ARDS|wet lung syndrome|C0035222;C0158940||C0035222|CHV|||  
ASA|2-(Acetyloxy)benzoic Acid|||C0004057|MSH;NCI;NDFRT;PDQ|||  
ASA|ASA|C0004057||C0004057|NCI;PDQ|||  
ASA|ASPIRIN|C0004057||C0004057|MTHSPL;NCI;NDFRT;VANDF|||  
ASA|Acetylsalicylic Acid|C0004057||C0004057|MSH;MTH;NCI;NDFRT;PDQ|||

ASA|Acetylsalicylic acid|C0004057|||C0004057|NCI;SNOMEDCT|||  
ASA|Acetylsalicylic acid - chemical|||C0004057|SNOMEDCT|||  
ASA|Acid, Acetylsalicylic|C0004057|||C0004057|MSH|||  
ASA|Adams-Stokes attack|||1  
ASA|Adaptive Speech Alignment|||1  
ASA|American Society of Anaesthesiologists|C2346733|||1|0.0089|  
ASA|American Society of Anesthesiologists|C2346733|1|0.186|||1|0.1441|1  
ASA|American Society of Anesthesiology|||1|0.0297|  
ASA|Antiplatelet aspirin|C0004057|||C0004057|SNOMEDCT|||  
ASA|Antiplatelet aspirin (product)|||C0004057|SNOMEDCT|||  
ASA|Antiplatelet aspirin (substance)|||C0004057|SNOMEDCT|||  
ASA|Aspirin|C0004057|||C0004057|LCH;MSH;MTH;MTHSPL;NCI;NDFRT;PDQ;RXNORM;SNOMEDCT  
;USPMG|||  
ASA|Aspirin (product)|C0004057|||C0004057|SNOMEDCT|||  
ASA|Aspirin (substance)|||C0004057|SNOMEDCT|||  
ASA|Aspirin - chemical|||C0004057|SNOMEDCT|||  
ASA|Aspirin - chemical (substance)|||C0004057|SNOMEDCT|||  
ASA|Aspirin [Chemical/Ingredient]|||C0004057|NDFRT|||  
ASA|Aspirin [antiplatelet]|C0004057|||C0004057|SNOMEDCT|||  
ASA|Aspirin [central nervous system use]|||C0004057|SNOMEDCT|||  
ASA|Aspirin [central nervous system use] (product)|||C0004057|SNOMEDCT|||  
ASA|Aspirin [central nervous system use] (substance)|||C0004057|SNOMEDCT|||  
ASA|Aspirin [musculoskeletal use]|||C0004057|SNOMEDCT|||  
ASA|Aspirin [musculoskeletal use] (product)|||C0004057|SNOMEDCT|||  
ASA|Aspirin [musculoskeletal use] (substance)|||C0004057|SNOMEDCT|||  
ASA|Aspirin product|C0004057|||C0004057|SNOMEDCT|||  
ASA|Aspirin product (substance)|||C0004057|SNOMEDCT|||  
ASA|Atrial septal aneurysm|C0521533|||1|0.0332|  
ASA|Benzoic acid, 2-(acetyloxy)-|||C0004057|MSH;NDFRT|||  
ASA|accessible surface area|||1|0.0148|  
ASA|acetylsalicylic acid|C0004057|||C0004057|PDQ|||  
ASA|acetylsalicylate|C0304348|||1|0.0071|  
ASA|acetylsalicylic  
acid|C0004057|1|0.808|C0004057|AOD;CHV;MSH;MTH;NCI;NDFRT;PDQ;SNOMEDCT|1|0.637|1  
ASA|active systemic anaphylaxis|||1|0.013|1  
ASA|activity|C0026606;C0205177;C0439167;C0441655;C1561536|||1|0.0059|  
ASA|acute severe asthma|C0038218|||1|0.0047|1  
ASA|allele-specific amplification|||1|0.0148|  
ASA|aminosalicylic acid|C0030125|1|0.006|||1  
ASA|anterior spinal artery|C0149603;C1278946|||1|0.0095|1  
ASA|anti-sperm antibodies|C0432662|||1|0.0119|  
ASA|antibody to surface antigen ratio|||1  
ASA|anticoagulation regimen of aspirin|||1  
ASA|antiplatelet aspirin|C0004057|||C0004057|CHV|||  
ASA|antisperm antibodies|||1|0.0451|  
ASA|argininosuccinate|C0368700|||1  
ASA|argininosuccinic acid|C0003777|||C0003777|CHV;MSH;NDFRT;SNOMEDCT|||1  
ASA|arsenate|C0104238|||1  
ASA|ascorbate|C0178487|||1|0.0148|  
ASA|aspirin|C0004057|||C0004057|AOD;CHV;CSP;MTHSPL;NCI;PDQ|||  
ASA|aspirin antiplatelet|C0004057|||C0004057|CHV|||  
ASA|aspirin chemicals|C0004057|||C0004057|CHV|||  
ASA|aspirin products|C0004057|||C0004057|CHV|||  
ASA|aspirin-sensitive asthma|||1|0.0053|1  
ASA|aspirins|C0004057|||C0004057|CHV|||  
ASA|asthma, nasal polyps, aspirin intolerance|||1  
ASA|atrial septal aneurysm|C0521533|||1

ASCUS|ASCUS|C0521060;C1510965|||C0521184|NCI;PDQ;SNOMEDCT|||  
ASCUS|Asci|C0521060|||C0521060|SNOMEDCT|||  
ASCUS|Ascus|C0521060;C1510965|||C0521060|SNOMEDCT|||  
ASCUS|Ascus (fungus)|C0521060|||C0521060|MTH;SNOMEDCT|||  
ASCUS|Ascus (fungus) (organism)|||C0521060|SNOMEDCT|||  
ASCUS|Atypical Squamous Cell of Uncertain  
Significance|C0521184|||C0521184|NCI|||  
ASCUS|Atypical Squamous Cell of Undetermined  
Significance|C0521184|||C0521184|NCI|||  
ASCUS|Atypical squamous cells of uncertain  
significance|C0521184|||C0521184|MTH;SNOMEDCT|||  
ASCUS|Atypical squamous cells of undetermined  
significance|C0521184|||C0521184|SNOMEDCT|||  
ASCUS|Atypical squamous cells of undetermined significance (morphologic  
abnormality)|||C0521184|SNOMEDCT|||  
ASCUS|asci|C0521060|||C0521060|CHV|||  
ASCUS|ascis|||C0521060|CHV|||  
ASCUS|ascu|||C0521060;C0521184|CHV|||  
ASCUS|ascus|C0521060;C1510965|||C0521060;C0521184|CHV;GO|||  
ASCUS|ascus fungus|C0521060|||C0521060|CHV|||  
ASCUS|atypical squamous cells of uncertain  
significance|C0521184|1|1.000|C0521184|CHV|||1  
ASCUS|atypical squamous cells of undetermined  
significance|C0521184|||C0521184|NCI;PDQ;SNOMEDCT|1|1|  
ASCVD|ASCVD|C0003972|||C0003972|MTHICD9;SNOMEDCT|||  
ASCVD|Arteriosclerotic Cardiovascular Disease|C0003972|||C0003972|NCI|||  
ASCVD|Arteriosclerotic cardiovascular  
disease|C0003972|||C0003972|MTHICD9;SNOMEDCT|||  
ASCVD|Arteriosclerotic cardiovascular disease (disorder)|||C0003972|SNOMEDCT|||  
ASCVD|Arteriosclerotic cardiovascular disease,  
NOS|C0003972|||C0003972|SNOMEDCT|||  
ASCVD|Ascvd|C0003972|||C0007222|ICD9CM|||  
ASCVD|Atherosclerotic Cardiovascular Disease|C0003972|||C0003972|MTH;NCI|||  
ASCVD|Atherosclerotic cardiovascular disease|C0003972|||C0003972|SNOMEDCT|||  
ASCVD|CARDIOVASC DIS|||C0007222|MSH|||  
ASCVD|CARDIOVASCULAR DISORDER|C0007222|||C0007222|CST|||  
ASCVD|CARDIOVASCULAR DISORDER (NOS)|C0007222|||C0007222|CST|||  
ASCVD|CARDIOVASCULAR DISORDERS|C0007222|||C0007222|CST|||  
ASCVD|CVD|C0007222|||C0007222|CSP;SNOMEDCT|||  
ASCVD|CVD, NOS|C0007222|||C0007222|SNOMEDCT|||  
ASCVD|CVS - Cardiovascular system diseases|||C0007222|SNOMEDCT|||  
ASCVD|CVS disease|C0007222|||C0007222|SNOMEDCT|||  
ASCVD|CVS disorders NOS|||C0007222|SNOMEDCT|||  
ASCVD|Cardiovascular Disease|C0007222;C1555754|||C0007222|MSH;NCI|||  
ASCVD|Cardiovascular Disease (CVD)|C0007222;C1555754|||C0007222|NCI|||  
ASCVD|Cardiovascular  
Diseases|C0007222|||C0007222|MEDLINEPLUS;MSH;MTH;NCI;NDFRT|||  
ASCVD|Cardiovascular Diseases [Disease/Finding]|||C0007222|NDFRT|||  
ASCVD|Cardiovascular Disorder|C0007222|||C0007222|NCI|||  
ASCVD|Cardiovascular Disorders|C0007222|||C0007222|NCI|||  
ASCVD|Cardiovascular arteriosclerosis|C0003972|||C0003972|MTHICD9;SNOMEDCT|||  
ASCVD|Cardiovascular arteriosclerosis unspecified|||C0003972|SNOMEDCT|||  
ASCVD|Cardiovascular arteriosclerosis unspecified  
(disorder)|||C0003972|SNOMEDCT|||  
ASCVD|Cardiovascular degeneration with  
arteriosclerosis|C0003972|||C0003972|SNOMEDCT|||

ASCVD|Cardiovascular disease|C0007222;C1555754|||C0007222|LNC;MTHICD9;SNOMEDCT|||

ASCVD|Cardiovascular disease with arteriosclerosis|C0003972|||C0003972|SNOMEDCT|||

ASCVD|Cardiovascular disease, NOS|C0007222;C1555754|||C0007222|SNOMEDCT|||

ASCVD|Cardiovascular disease, unspecified|C0007222|||C0007222|ICD9CM|||

ASCVD|Cardiovascular disorder|C0007222|||C0007222|SNOMEDCT|||

ASCVD|Cardiovascular disorder, NOS|C0007222|||C0007222|SNOMEDCT|||

ASCVD|Cardiovascular sclerosis with arteriosclerosis|C0003972|||C0003972|SNOMEDCT|||

ASCVD|Cardiovascular system disease|C0007222|||C0007222|SNOMEDCT|||

ASCVD|Cardiovascular system diseases|C0007222|||C0007222|SNOMEDCT|||

ASCVD|DISORDER CARDIOVASCULAR (NOS)|||C0007222|CST|||

ASCVD|Disease of cardiovascular system|C0007222|||C0007222|SNOMEDCT|||

ASCVD|Disease of cardiovascular system (disorder)|||C0007222|SNOMEDCT|||

ASCVD|Disease of cardiovascular system, NOS|C0007222|||C0007222|SNOMEDCT|||

ASCVD|Disease, Cardiovascular|C0007222;C1555754|||C0007222|MSH|||

ASCVD|Diseases, Cardiovascular|C0007222|||C0007222|MSH|||

ASCVD|Disorder of cardiovascular system|C0007222|||C0007222|SNOMEDCT|||

ASCVD|Disorder of cardiovascular system (disorder)|||C0007222|SNOMEDCT|||

ASCVD|[X]Cardiovascular disease, unspecified|||C0007222|SNOMEDCT|||

ASCVD|[X]Cardiovascular disease, unspecified (disorder)|||C0007222|SNOMEDCT|||

ASCVD|arteriosclerosis cardiovascular|||C0003972|CHV|||

ASCVD|arteriosclerotic cardiovascular disease|C0003972|1|1.000|C0003972|MTHICD9;NCI;SNOMEDCT|||1

ASCVD|ascvd|C0003972|||C0003972|CHV|||

ASCVD|atherosclerotic cardiovascular disease|C0003972|||1|1|1|1

ASCVD|cardiovascular disease|C0007222;C1555754|||C0007222|CHV|||

ASCVD|cardiovascular diseases|C0007222|||C0007222|CHV|||

ASCVD|cardiovascular disorder|C0007222|||C0007222|AOD;CHV;CSP|||

ASCVD|cardiovascular disorders|C0007222|||C0007222|CHV|||

ASCVD|cardiovascular system disease|C0007222|||C0007222|CHV|||

ASCVD|cardiovascular system diseases|C0007222|||C0007222|CHV|||

ASD|ASD|C0018817;C1510586|||C0018817;C1510586|DXP;OMIM|||

ASD|ASD - Atrial septal defect|C0018817|||C0018817|SNOMEDCT|||

ASD|ATRIAL SEPTAL DEFECT|C0018817|||C0018817|COSTAR;CST;DXP;QMR|||

ASD|AUTISM SPECTRUM DISORDER|C1510586|||C1510586|OMIM|||

ASD|Acute Stress Disorder|C0236816|||1|0.066|

ASD|Alzheimer senile dementia|||1|

ASD|Atria septal defect (ASD)|||C0018817|OMIM|||

ASD|Atrial Septal Defect|C0018817|||C0018817|MSH;NCI;NDFRT|||

ASD|Atrial Septal Defects|C0018817|||C0018817|MSH;MTH;NDFRT|||

ASD|Atrial septal defect|C0018817|||C0018817|CCS;OMIM;SNOMEDCT|||

ASD|Atrial septal defect (ASD)|C0018817|||C0018817|OMIM|||

ASD|Atrial septal defect (disorder)|||C0018817|SNOMEDCT|||

ASD|Atrial septal defect NOS|C0018817|||C0018817|SNOMEDCT|||

ASD|Atrial septal defect NOS (disorder)|||C0018817|SNOMEDCT|||

ASD|Atrial septal defects|C0018817|||C0018817|OMIM|||

ASD|Auricular septal defect NOS|||C0018817|SNOMEDCT|||

ASD|Auricular septal defect NOS (disorder)|||C0018817|SNOMEDCT|||

ASD|Autism Spectrum Disorder|C1510586|||C1510586|MSH;NCI|1|0.1028|

ASD|Autism Spectrum Disorders|C1510586|||C1510586|MSH;MTH|||

ASD|Congenital atrial septal defect|C0018817|||C0018817|SNOMEDCT|||

ASD|Congenital atrial septal defect (disorder)|||C0018817|SNOMEDCT|||

ASD|DEFECT ARTRIAL SEPTUM|C0018817|||C0018817|CST|||

ASD|Defect, Atrial Septal|C0018817|||C0018817|MSH|||

ASD|Defects, Atrial Septal|C0018817|||C0018817|MSH|||

ASD|Disorder, Autism Spectrum|C1510586|||C1510586|MSH|||  
ASD|Disorders, Autism Spectrum|C1510586|||C1510586|MSH|||  
ASD|HEART SEPTAL DEFECT ATRIAL|||C0018817|CST|||  
ASD|Heart Septal Defects, Atrial|C0018817|||C0018817|MSH;NDFRT|||  
ASD|Heart Septal Defects, Atrial [Disease/Finding]|||C0018817|NDFRT|||  
ASD|IA SEPTAL DEFECT|C0018817|||C0018817|CST|||  
ASD|Interatrial septal defect|C0018817|||C0018817|SNOMEDCT|||  
ASD|Interauricular septal defect|C0018817|||C0018817|SNOMEDCT|||  
ASD|Interauricular septal defect (disorder)|||C0018817|SNOMEDCT|||  
ASD|SEPTAL DEFECT INTERATRIAL|C0018817|||C0018817|CST|||  
ASD|Septal Defect, Atrial|C0018817|||C0018817|MSH|||  
ASD|Septal Defects, Atrial|C0018817|||C0018817|MSH|||  
ASD|Spectrum Disorder, Autism|C1510586|||C1510586|MSH|||  
ASD|Spectrum Disorders, Autism|C1510586|||C1510586|MSH|||  
ASD|acute stress disorder|C0236816|||1  
ASD|adaptive seating device|||1  
ASD|adult Still's disease|C0085253|||1|0.0227|  
ASD|adult/adolescent spectrum of disease|||1  
ASD|air-space disease|||1  
ASD|aldosterone secretion defect|||1  
ASD|androstenedione|C0002860;C0337432|||1|0.0152|  
ASD|anterior sagittal diameter|||1  
ASD|anti-siphon device|||1|0.0065|  
ASD|antisiphon device|||1|0.0065|1  
ASD|argininosuccinic acid synthetase deficiency|C0175683|||1  
ASD|arthritis syphilitica deformans|||1  
ASD|arthroscopic subacromial decompression|||C0408088|SNOMEDCT|1|0.0195|  
ASD|asd|C0018817;C1510586|||C0018817|CHV;RAM|||  
ASD|aspartate semialdehyde dehydrogenase|C0004012|||1|0.0054|  
ASD|atrial septal  
defect|C0018817|1|0.956|C0018817|CCS;CHV;COSTAR;CSP;CST;DXP;MSH;NCI;NDFRT;OMIM;Q  
MR;SNOMEDCT|1|0.6981|1  
ASD|atrial septal defect (ASD)|C0018817|||C0018817|CHV|||  
ASD|atrial septal defects|C0018817|||C0018817|CHV|||  
ASD|atrial septal heart defect|C0018817|||C0018817|CHV|||  
ASD|atrial septal heart defects|C0018817|||C0018817|CHV|||  
ASD|atrioseptal defect|C0018817|||C0018817|CHV;CSP|||  
ASD|autism spectrum disorder|C1510586|1|0.034|C1510586|MSH;NCI;OMIM|||1  
ASD|autistic spectrum disorder|C0524528|||1|0.0574|  
ASD|interatrial septal defect|C0018817|||C0018817|CHV|||  
AST|ASAT - Aspartate aminotransferase|C0004002|||C0004002|SNOMEDCT|||  
AST|AST|||C0004002;C0201899;C0242192;C1420113|AOD;CHV;HUGO;NCI|||  
AST|AST - Aspartate transaminase|C0004002|||C0004002|SNOMEDCT|||  
AST|AST measurement|C0201899|||C0201899|SNOMEDCT|||  
AST|Aminotransferase, Aspartate|C0004002|||C0004002|MSH|||  
AST|Aminotransferase, L-Aspartate-2-Oxoglutarate|C0004002|||C0004002|MSH|||  
AST|Aminotransferases, Aspartate|C0004002|||C0004002|MSH|||  
AST|Antimicrobial susceptibility testing|||1|0.0962|  
AST|Aphasia Screening Test|C0450996|||1  
AST|Apoaminotransferase, Aspartate|C0004002|||C0004002|MSH|||  
AST|Aryl sulfotransferase|C0003942;C1152487|||1|0.0705|  
AST|Aspartate Aminotransferase|C0004002|||C0004002;C0201899|MSH;MTH;NCI;NDFRT|||  
AST|Aspartate Aminotransferase Measurement|C0201899|||C0201899|NCI|||  
AST|Aspartate Aminotransferases|C0004002|||C0004002|MSH;NDFRT|||  
AST|Aspartate Aminotransferases [Chemical/Ingredient]|||C0004002|NDFRT|||  
AST|Aspartate Apoaminotransferase|C0004002|||C0004002|MSH;NDFRT|||  
AST|Aspartate Transaminase|C0004002;C0242192|||C0004002|MSH;MTH;NDFRT|||

AST|Aspartate aminotransferase|C0004002|||C0004002|LNC;SNOMEDCT|||  
AST|Aspartate aminotransferase (substance)|||C0004002|SNOMEDCT|||  
AST|Aspartate aminotransferase assay|C0201899|||C0201899|MTH|||  
AST|Aspartate aminotransferase measurement|C0201899|||C0201899|SNOMEDCT|||  
AST|Aspartate aminotransferase measurement (procedure)|||C0201899|SNOMEDCT|||  
AST|Aspartate transaminase|C0004002;C0242192|||C0004002|SNOMEDCT|||  
AST|GLUTAMIC OXALOACETIC TRANS 000|||C0004002|MSH|||  
AST|GOT|||C0004002|AOD;SNOMEDCT|||  
AST|GOT measurement|C0201899|||C0201899|SNOMEDCT|||  
AST|Glutamate Aspartate Transaminase|C0004002|||C0004002|MSH|||  
AST|Glutamate oxaloacetate transaminase|C0004002|||C0004002|SNOMEDCT|||  
AST|Glutamate-Aspartate Transaminase|C0004002|||C0004002|MSH;NDFRT|||  
AST|Glutamic Oxaloacetic Transaminase|C0004002|||C0004002|MSH|||  
AST|Glutamic oxaloacetic transaminase measurement|C0201899|||C0201899|SNOMEDCT|||  
AST|Glutamic-Oxaloacetic Transaminase|C0004002|||C0004002|MSH;MTH;NDFRT|||  
AST|Glutamic-Oxaloacetic Transaminase, Serum|C0242192|||C0242192|MSH|||  
AST|Glutamic-aspartic transaminase|C0004002|||C0004002|SNOMEDCT|||  
AST|Glutamic-oxaloacetic transaminase|C0004002|||C0004002|SNOMEDCT|||  
AST|ISSD|C1096902;C1420113|||C1420113|HUGO|||  
AST|L Aspartate 2 Oxoglutarate Aminotransferase|C0004002|||C0004002|MSH|||  
AST|L-Aspartate-2-Oxoglutarate Aminotransferase|C0004002|||C0004002|MSH;NDFRT|||  
AST|L-Aspartate:2-oxoglutarate aminotransaminase|||C0004002|MSH;NDFRT|||  
AST|L-aspartate:2-oxoglutarate aminotransferase|C0004002|||C0004002|SNOMEDCT|||  
AST|NSD|C1420113;C2930923|||C1420113|HUGO|||  
AST|S-ASAT|C0004002|||C0004002|AOD|||  
AST|SD|||C1420113|HUGO|||  
AST|SGOT|C0201899|||C0201899;C0242192|MSH;MTH;NCI;SNOMEDCT|||  
AST|SGOT (AST)|||C0242192|NCI|||  
AST|SGOT - Glutamate oxaloacetate transaminase|C0242192|||C0242192|MTH;SNOMEDCT|||  
AST|SGOT measurement|C0201899|||C0201899|SNOMEDCT|||  
AST|SIALIN|C1420113|||C1420113|HUGO;OMIM|||  
AST|SLC17A5|C1420113|||C1420113|HUGO;OMIM|||  
AST|SLC17A5 gene|C1420113|||C1420113|HUGO;MTH|||  
AST|SLD|C1420113|||C1420113|HUGO|||  
AST|SOLUTE CARRIER FAMILY 17 (SODIUM PHOSPHATE COTRANSPORTER), MEMBER 5|||C1420113|OMIM|||  
AST|Serum Glutamic Oxaloacetic Transaminase|C0242192|||C0242192|MSH|||  
AST|Serum Glutamic-Oxaloacetic Transaminase|C0242192|||C0242192|MSH|||  
AST|Transaminase A|||C0004002|SNOMEDCT|||  
AST|Transaminase, Aspartate|C0004002;C0242192|||C0004002|MSH|||  
AST|Transaminase, Glutamate-Aspartate|C0004002|||C0004002|MSH|||  
AST|Transaminase, Glutamic-Oxaloacetic|C0004002|||C0004002|MSH|||  
AST|Transaminase, Serum Glutamic-Oxaloacetic|C0242192|||C0242192|MSH|||  
AST|above selected threshold|1  
AST|acid suppression therapy|1  
AST|acoustic stimulation test|C0521310|1  
AST|acute suppurative thyroiditis|C0040150|1|0.0705|  
AST|alcohol sniff test|1  
AST|androgen suppression therapy|1|0.0256|1  
AST|angiotensin sensitivity test|1  
AST|anterior spinothalamic tract|C0228591;C1289706|||C0228591;C1289706|FMA;SNOMEDCT|||1  
AST|antistreptolysin titer|C1318462|1  
AST|antistreptozyme|1  
AST|arginine stimulation test|C0430097|1|0.0385|

AST|aspartate|C0085845|||||1|0.2051|  
AST|aspartate  
aminotransferase|C0004002|1|1.000|C0004002;C0201899|AOD;CHV;CSP;LNC;MSH;MTH;NCI;  
NDFRT;SNOMEDCT|||1  
AST|aspartate aminotransferase (AST) assay test||||C0201899|CHV|||  
AST|aspartate transaminase|C0004002;C0242192|||C0004002;C0242192|CHV;CSP;NCI|||  
AST|aspartate transaminase (AST)|C0004002;C0242192|||C0004002|CHV|||  
AST|aspartate transferase|||||1|0.0962|  
AST|aspartate-aminotransferase|C0004002|||||1|0.109|  
AST|astigmatism|C0004106|||C0004106|AOD;CHV;COSTAR;CSP;CST;DXP;ICD9CM;LCH;MEDLIN  
EPLUS;MSH;NDFRT;OMIM;SNOMEDCT|||1  
AST|atrial overdrive stimulation rate|||||||1  
AST|audiometry sweep test|||||||1  
AST|glutamate oxaloacetate transaminase|C0004002|||C0004002|AOD|||  
AST|glutamic aspartic transaminase|C0004002|||C0004002|CSP|||  
AST|glutamic oxaloacetic transaminase|C0004002|||C0004002|CSP|||  
AST|got|||C0004002|CHV|||  
AST|s-asat|C0004002|||C0004002|CHV|||  
AST|serum AST|C0201899|||C0201899|MTH|||  
AST|serum SGOT|C0201899|||C0201899|MTH|||  
AST|serum aspartate transaminase|||||1|0.2885|  
AST|serum glutamate oxaloacetate transaminase (SGOT)|||C0242192|CHV|||  
AST|serum glutamic-oxaloacetic transaminase|C0242192|||C0242192|NCI|||  
AST|sgot|C0201899|||C0242192|CHV|||  
AST|solute carrier family 17 (anion/sugar transporter), member  
5|||C1420113|HUGO|||  
AST|transaminase A|||C0004002|CSP|||  
ATG|AC|C1879503|||C0003354|NCI|||  
ATG|AG|||C0003354|NCI|||  
ATG|ANTI-THYMOCYTE GLOBULIN|C0003442|||C0003442|NDFRT;VANDF|||  
ATG|ANTIGUA AND BARBUDA|||C0003354|NCI|||  
ATG|ATG|||C0003354;C0003442|NCI;PDQ;SNOMEDCT|||  
ATG|ATS|||C0003442|NCI|||  
ATG|Anti Thymocyte Globulin|C0003442|||C0003442|MSH|||  
ATG|Anti-Thymocyte Globulin|C0003442|||C0003442|MSH;NCI|||  
ATG|Anti-Thymocyte Globulins|C0003442|||C0003442|MSH|||  
ATG|Antigua and Barbuda|||C0003354|AOD;MSH;MTH;NCI;SNOMEDCT|||  
ATG|Antigua and Barbuda (geographic location)|||C0003354|SNOMEDCT|||  
ATG|Antithymocyte Globulin|C0003442|||C0003442|MSH;NCI|||  
ATG|Antithymocyte Globulins|C0003442|||C0003442|MSH|||  
ATG|Antithymocyte Serum|C0003442|||C0003442|NCI|||  
ATG|Antithymocyte gamma globulin|C0003442|||C0003442|SNOMEDCT|||  
ATG|Antithymocyte globulin|C0003442|||C0003442|SNOMEDCT|||  
ATG|Antithymocyte immunoglobulin|C0003442|||C0003442|SNOMEDCT|||  
ATG|Antithymoglobulin|C0003442|||C0003442|MSH|||  
ATG|Antithymoglobulins|C0003442|||C0003442|MSH|||  
ATG|Aurothioglucose|C0018033|||||1|0.0216|  
ATG|Barbuda and Antigua|||C0003354|MSH|||  
ATG|GLOBULIN, ANTI-THYMOCYTE|||C0003442|NDFRT;VANDF|||  
ATG|Globulin, Anti-Thymocyte|C0003442|||C0003442|MSH|||  
ATG|Globulin, Antithymocyte|C0003442|||C0003442|MSH|||  
ATG|Globulins, Anti-Thymocyte|C0003442|||C0003442|MSH|||  
ATG|Globulins, Antithymocyte|C0003442|||C0003442|MSH|||  
ATG|Lymphocyte Immune Globulin, Anti Thymocyte  
Globulin|C0003442|||C0003442|MSH|||  
ATG|Lymphocyte Immune Globulin, Anti-Thymocyte  
Globulin|C0003442|||C0003442|MSH;MTH;RXNORM|||

ATG|adenine-thymine-guanine|||||1  
ATG|angiotensinogen|C0003017|||C0003017;C0523500;C1366631|AOD;CHV;CSP;LNC;MSH;MTH;NCI;NDFRT;OMIM;SNOMEDCT|1|0.0294|  
ATG|anti thymocyte globulin|C0003442|||C0003442|CHV|||  
ATG|anti-thymocyte globulin|C0003442|||C0003442|CHV;PDQ|1|0.2137|  
ATG|antihuman thymocyte globulin|||||1  
ATG|antithymocyte globulin|C0003442|1|1.000|C0003442|CHV;MSH;NCI;PDQ;SNOMEDCT|1|0.7353|1  
ATG|antithymocyte globulins|C0003442|||C0003442|CHV|||  
ATG|antithymocyte immunoglobulin|C0003442|||C0003442|CHV|||  
ATG|antithymoglobulin|C0003442|||C0003442|MSH|||  
ATG|antithyroglobulin|C0443883|||||1  
ATG|atg|||C0003442|CHV|||  
ATG|aurothioglucose|C0018033|||C0018033|CHV;CSP;MSH;NCI;NDFRT;RXNORM;SNOMEDCT;VANDF|||  
ATN|ALBINISM I|C0268494|||C0268494|OMIM|||  
ATN|ALBINISM, OCULOCUTANEOUS, TYPE IA|C0268494|||C0268494|OMIM|||  
ATN|ATN|C0268494|||C0268494|OMIM|||  
ATN|Albinism 1|C0268494|||C0268494|MSH|||  
ATN|OCA1|C0268494|||C0268494|OMIM|||  
ATN|OCA1 - Tyrosinase-negative oculocutaneous albinism|C0268494|||C0268494|SNOMEDCT|||  
ATN|OCA1A|C0268494|||C0268494|MSH;OMIM|||  
ATN|OCULOCUTANEOUS ALBINISM, TYPE I|C0268494|||C0268494|OMIM|||  
ATN|OCULOCUTANEOUS ALBINISM, TYROSINASE-NEGATIVE|C0268494|||C0268494|OMIM|||  
ATN|Oculocutaneous albinism type 1|C0268494|||C0268494|MSH|||  
ATN|Oculocutaneous albinism type 1A|C0268494|||C0268494|MSH|||  
ATN|Oculocutaneous albinism, tyrosinase negative|C0268494|||C0268494|MSH|||  
ATN|Tyrosinase-negative oculocutaneous albinism|C0268494|||C0268494|SNOMEDCT|||  
ATN|Tyrosinase-negative oculocutaneous albinism (disorder)|||C0268494|SNOMEDCT|||  
ATN|Tyrosinase-related oculocutaneous albinism|||C0268494|SNOMEDCT|||  
ATN|acute tubular necrosis|C0022672|1|1.000|C0022672|CHV;COSTAR;CSP;DXP;MTHICD9;SNOMEDCT|1|0.9693|1  
ATN|anterior thalamic nuclei|C0228316|||||1|0.0307|  
ATN|augmented transition network|||||1  
ATN|autonomous thyroid nodule|||||1  
ATN|tyrosinase-negative oculocutaneous albinism|C0268494|||C0268494|SNOMEDCT|||1  
AVF|Arteriovenous fistula|C0003855|||||1|0.8237|  
AVF|Arteriovenous fistulae|C0003855|||||1|0.1208|  
AVF|Lead AVF|C0449215|||C0449215|LNC|||  
AVF|aVF|C0449215|||C0449215|SNOMEDCT|||  
AVF|aVF (body structure)|||C0449215|SNOMEDCT|||  
AVF|abdominal visceral fat|C1563740|||||1|0.0556|  
AVF|antiviral factor|||||1  
AVF|arteriovenous fistula|C0003855|1|0.024|||||1  
AVF|augmented vector foot|C2983584|1|0.976|||||  
AVF|augmented voltage left leg|||||1  
AVF|avf|C0449215|||C0449215|CHV|||  
AVF|lead aVF|C0449215|||C0449215|CHV|||  
AVM|AV - Congenital arteriovenous malformation|C0003857|||C0003857|SNOMEDCT|||  
AVM|AVM|C0003857;C0279476|||C0003857;C0279476|MEDLINEPLUS;NCI;PDQ|||  
AVM|AVM - Congenital arteriovenous malformation|||C0003857|SNOMEDCT|||  
AVM|Arteriovenous Malformation|C0003857;C0334533|||C0003857|MSH;NCI|||  
AVM|Arteriovenous Malformation, Unspecified|C0003857|||C0003857|COSTAR|||

AVM|Arteriovenous Malformations|C0003857;C0334533|||C0003857|MEDLINEPLUS;MSH;NDFRT|||  
AVM|Arteriovenous Malformations [Disease/Finding]|||C0003857|NDFRT|||  
AVM|Arteriovenous malformation|C0003857;C0334533|||C0003857|OMIM;SNOMEDCT|||  
AVM|Arteriovenous malformation (morphologic abnormality)|||C0003857|SNOMEDCT|||  
AVM|Arteriovenous malformation, NOS|C0003857;C0334533|||C0003857|SNOMEDCT|||  
AVM|Avermectin Bla|C0052701|||1|0.0097|  
AVM|CONGENITAL ARTERIOVENOUS MALFORMATION|C0003857|||C0003857|COSTAR|||  
AVM|Congenital arteriovenous malformation|C0003857|||C0003857|MTH;SNOMEDCT|||  
AVM|Congenital arteriovenous malformation (disorder)|||C0003857|SNOMEDCT|||  
AVM|DOX/MTX/VBL|||C0279476|NCI;PDQ|||  
AVM|Doxorubicin/Methotrexate/Vinblastine|C0279476|||C0279476|MTH;NCI|||  
AVM|Malformation, Arteriovenous|C0003857;C0334533|||C0003857|MSH|||  
AVM|Malformations, Arteriovenous|C0003857;C0334533|||C0003857|MSH|||  
AVM|a v malformation|C0003857|||C0003857|CHV|||  
AVM|a v malformations|C0003857|||C0003857|CHV|||  
AVM|a-v malformation|C0003857|||C0003857|CHV|||  
AVM|anomalies arteriovenous|||C0003857|CHV|||  
AVM|arteriovenous anomaly|C0003857|||C0003857|CHV|||  
AVM|arteriovenous malformation|C0003857;C0334533|1|0.974|C0003857;C0334533|CHV;CSP;MSH;MTH;NCI;OMI M;SNOMEDCT|1|0.9807|1  
AVM|arteriovenous malformations|C0003857;C0334533|||C0003857|CHV|||  
AVM|atrioventricular malformation|||1  
AVM|av malformation|C0003857|||C0003857|CHV|||  
AVM|av malformations|C0003857|||C0003857|CHV|||  
AVM|avian vacuolar myelinopathy|||1|0.0097|  
AVM|aviation medicine|C0004431|||C0004431|CHV;MSH|||1  
AVM|doxorubicin/methotrexate/vinblastine|C0279476|||C0279476|PDQ|||  
AV|AO|||C0280598|NCI;PDQ|||  
AV|AV|||C0280598;C0752050;C1706433|FMA;NCI;PDQ|||  
AV|Adriamycin and vincristine|||1|0.0015|  
AV|Anterior ventral nucleus of thalamus|C0752050|||C0752050|FMA|||  
AV|Anteroprecipital thalamic nucleus|C0752050|||C0752050|FMA|||  
AV|Anteroventral Nucleus|C0752050|||C0752050|MSH|||  
AV|Anteroventral Thalamic Nucleus|C0752050|||C0752050|MSH;MTH|||  
AV|Anteroventral nucleus|C0752050|||C0752050|FMA|||  
AV|Anteroventral nucleus of thalamus|C0752050;C1761582|||C0752050|FMA;SNOMEDCT|||  
AV|Anteroventral nucleus of thalamus (body structure)|||C0752050|SNOMEDCT|||  
AV|Anteroventral thalamic nucleus|C0752050|||C0752050|FMA|||  
AV|Artificial vagina|||1|0.0027|  
AV|Atrioventricular|||1|0.7569|  
AV|Audiovisual|||1|0.0042|  
AV|CAP|C0179586;C1657858;C1706092;C2985259|||C1706433|NCI|||  
AV|CAPSULE|C0006935;C1325531;C1704652;C1706433;C2825041|||C1706433|NCI|||  
AV|Cap|C0179586;C1657858;C1706092;C2985259|||C1706433|NCI|||  
AV|Capsule|C0006935;C1325531;C1704652;C1706433;C2825041|||C1706433|NCI;SNOMEDCT|||  
AV|Capsule - unit of product usage|C1706433|||C1706433|SNOMEDCT|||  
AV|Capsule - unit of product usage (qualifier value)|||C1706433|SNOMEDCT|||  
AV|Capsule Dosing Unit|C1706433|||C1706433|MTH;NCI|||  
AV|DOX/VCR|||C0280598|NCI;PDQ|||  
AV|DOX/VCR chemotherapy protocol|||C0280598|CHV|||  
AV|Doxorubicin/Vincristine|||C0280598|NCI|||  
AV|Nucleus anterior principalis (Hassler)|||C0752050|FMA|||  
AV|Nucleus anterior thalami ventralis|C0752050|||C0752050|FMA|||

AV|Nucleus anterior ventralis|C0752050|||C0752050|FMA|||  
AV|Nucleus anteroinferior|||C0752050|FMA|||  
AV|Nucleus anteroventralis|C0752050;C1761582|||C0752050|FMA;SNOMEDCT|||  
AV|Nucleus anteroventralis (body structure)|||C0752050|SNOMEDCT|||  
AV|Nucleus anteroventralis of thalamus|C0752050|||C0752050|FMA|||  
AV|Nucleus anteroventralis thalami|C0752050|||C0752050|FMA|||  
AV|Nucleus thalamicus anteroprincipalis|C0752050|||C0752050|FMA|||  
AV|Nucleus, Anteroventral|C0752050|||C0752050|MSH|||  
AV|Nucleus, Anteroventral Thalamic|C0752050|||C0752050|MSH|||  
AV|Structure of anteroventral nucleus of thalamus|C0752050|||C0752050|SNOMEDCT|||  
AV|Structure of anteroventral nucleus of thalamus (body structure)|||C0752050|SNOMEDCT|||  
AV|Thalamic Nucleus, Anteroventral|C0752050|||C0752050|MSH|||  
AV|abomasal volvulus|||||1|0.0036|  
AV|abvolt|||||1|  
AV|adenoassociated virus|C0001417;C1564874|||||1|  
AV|adriamycin plus vincristine|||||1|0.0015|  
AV|allergic vasculitis|C0151436|||||1|  
AV|alveolar duct|C0391892|||C0391892|CHV;FMA;NCI;UWDA|||1|  
AV|annexin V|C0059249;C1332095|||||1|0.0018|  
AV|anterior ventral|||||1|0.0042|  
AV|anteroventral|||||1|  
AV|anteroventral nucleus|C0752050|||||1|0.0015|  
AV|anteversion|C0333053|||||1|  
AV|anteverted|||||1|  
AV|anticipatory vomiting|C0042964|||||1|  
AV|aortic valve|C0003501;C1269005|1|0.016|C0003501;C1269005|AOD;CHV;CSP;FMA;HL7V2.5;LCH;LNC;MSH;NCI;SNOMEDCT;UWDA|1|0.0097|1|  
AV|arteriovenous|C0302193;C0450109|1|0.232|||1|0.1574|1|  
AV|artificial ventilation|C0035205|||||1|0.0024|1|  
AV|assisted ventilation|C0554804|||C0554804|CHV|1|0.0021|1|  
AV|atrio-ventricular|||||1|0.0314|  
AV|atrioventricular||1|0.748||||1|  
AV|audiovisual|||||1|  
AV|auditory-visual|||||1|0.0042|1|  
AV|augmented vector|||||1|  
AV|autophagic vacuoles|C0544966|||||1|0.0054|  
AV|aviation medicine|C0004431|||||1|  
AV|avoirdupois|||||1|  
AV|cap|C0179586;C1657858;C1706092;C2985259|||C1706433|NCI|||  
AV|capsule|C0006935;C1325531;C1704652;C1706433;C2825041|||C1706433|NCI|||  
AV|doxorubicin and vincristine chemotherapy protocol|||C0280598|CHV|||  
AV|doxorubicin/vincristine|||C0280598|PDQ|||  
AV|doxorubicin/vincristine protocol|||C0280598|MTH|||  
AV|femoral anteversion|||||1|0.0021|  
AV|human adenovirus|C0001490|||||1|0.0027|  
AV|velocity|C0439830;C1547053|||||1|0.0045|  
AV|{Capsule}|C0006935;C1325531;C1704652;C1706433;C2825041|||C1706433|NCI|||  
AVR|Lead AVR|C0449217|||C0449217|LNC|||  
AVR|aVR|C0449217|||C0449217|SNOMEDCT|||  
AVR|aVR (body structure)|||C0449217|SNOMEDCT|||  
AVR|accelerated ventricular rhythm|||||1|  
AVR|acute vascular rejection|||||1|0.0634|  
AVR|antiviral regulator|||||1|  
AVR|aortic valve regurgitation|C0003504|1|0.010|||||

AVR|aortic valve  
replacement|C0003506|1|0.762|C0003506|CHV;COSTAR;NCI;SNOMEDCT|1|0.8687|1  
AVR|aortic valve resistance||1|0.008||||  
AVR|arteriole-to-venule ratio||||1|0.0133|  
AVR|ascending vasa recta|C2952018||C2952018|FMA|1|0.0398|  
AVR|augmented voltage right arm||1|0.206||||1  
AVR|lead avr|C0449217||C0449217|CHV||  
AVR|pathogen avirulence||||1|0.0147|  
BAI|Baying|C0234880||C0234880|SNOMEDCT||  
BAI|Baying (function)|||C0234880|SNOMEDCT||  
BAI|Baying (observable entity)|||C0234880|SNOMEDCT||  
BAI|Baying, function (observable entity)|||C0234880|SNOMEDCT||  
BAI|Brain Atrophy Index||||1|  
BAI|bai|C0234880||C0234880|CHV||  
BAI|baies|C0234880||C0234880|CHV||  
BAI|basilar artery insufficiency|C0004812||||1|  
BAI|basion-axial interval||||1|  
BAI|bay|C0234880;C3203003||C0234880|CHV||  
BAI|baying|C0234880||C0234880|CHV||  
BAI|bays|C0234880;C3203003||C0234880|CHV||  
BAI|beck anxiety inventory|C0582613|1|1.000||||  
BAI|blunt abdominal injury||||1|  
BAI|blunt aortic injury||||1|0.2791|1  
BAI|brain atrophy index||||1|0.1395|  
BAI|breath-actuated inhaler||||1|  
BAI|bronchial arterial infusion||||1|0.3488|1  
BAI|bronchial artery infusion||||1|0.2326|  
BAL|1,2-Dithioglycerol|||C0012383|NCI||  
BAL|1-Propanol, 2,3-dimercapto-|||C0012383|MSH;NDFRT||  
BAL|2,3 Dimercaptopropanol|||C0012383|MSH||  
BAL|2,3 Dithiopropan 1 o1|||C0012383|MSH||  
BAL|2,3-Dimercapto-1-propanol|||C0012383|NCI||  
BAL|2,3-Dimercaptopropanol|||C0012383|MSH;NDFRT||  
BAL|2,3-Dithiopropan-1-o1|||C0012383|MSH;NDFRT||  
BAL|2,3-dimercapto-1-propanol||||1|0.004|  
BAL|2,3-dimercaptopropanol||||1|0.0107|  
BAL|Anti-Lewisite Agent, British|C0012383||C0012383|MSH||  
BAL|Anti-Lewisite, British|C0012383||C0012383|MSH||  
BAL|B-AGGRESSIVE LYMPHOMA 1|C1538586||C1538586|OMIM||  
BAL|BAC|||C0684262|AOD||  
BAL|BAL|||C0012383;C0684262;C1538586|AOD;HUGO;LNC;OMIM;SNOMEDCT||  
BAL|BAL - British Anti-Lewisite|C0012383||C0012383|SNOMEDCT||  
BAL|BAL-Dimercaprol|C0012383||C0012383|SNOMEDCT||  
BAL|BAL1|C1538586||C1538586|HUGO;OMIM||  
BAL|Blood alcohol concentration|C0684262||C0684262|MTH||  
BAL|British Anti Lewisite|C0012383||C0012383|MSH||  
BAL|British Anti Lewisite Agent|C0012383||C0012383|MSH||  
BAL|British Anti-Lewisite|C0012383||C0012383|MSH;NDFRT;SNOMEDCT|1|0.0034|  
BAL|British Anti-Lewisite Agent|C0012383||C0012383|MSH;NDFRT||  
BAL|British anti-Lewisite|C0012383||||1|  
BAL|British anti-Lewisite (BAL)|C0012383||C0012383|CHV||  
BAL|British anti-lewisite|C0012383||C0012383|SNOMEDCT||  
BAL|DIMERCAPROL|C0012383||C0012383|NCI;NDFRT;VANDF||  
BAL|Dimercaprol|C0012383||C0012383|MSH;MTH;MTHSPL;NCI;NDFRT;RXNORM;SNOMEDCT||  
BAL|Dimercaprol (product)|||C0012383|SNOMEDCT||  
BAL|Dimercaprol (substance)|||C0012383|SNOMEDCT||  
BAL|Dimercaprol [Chemical/Ingredient]|||C0012383|NDFRT||

BAL|Dimercaptopropanol|C0012383|||C0012383|SNOMEDCT|||  
BAL|Dithioglycerol|C0012383|||C0012383|SNOMEDCT|||  
BAL|PARP9|C1538586|||C1538586|HUGO;OMIM|||  
BAL|PARP9 gene|C1538586|||C1538586|HUGO;MTH|||  
BAL|POLY(ADP-RIBOSE) POLYMERASE 9|C1538586|||C1538586|OMIM|||  
BAL|bal|||C0012383|CHV|||  
BAL|balance|C0014653;C0205415;C0560184|||1  
BAL|balanced|C0205415|||C0205415|CHV;SNOMEDCT|||  
BAL|balsam|C0004714|||1  
BAL|bioartificial liver|C0336562|||C0336562|CHV;CSP;MSH|1|0.021|1  
BAL|biphenotypic acute leukemia|C0023464|||C0023464|MSH;NDFRT|1|0.0017|  
BAL|blood alcohol concentration|C0684262|||C0684262|AOD;CHV|||  
BAL|blood alcohol concentration (BAC)|C0684262|||C0684262|CHV|||  
BAL|blood alcohol  
level|C0428249;C0542492;C0684262|1|0.086|C0428249;C0542492;C0684262|AOD;CHV;CSP;  
SNOMEDCT|1|0.0158|1  
BAL|british anti lewisite|C0012383|||C0012383|CHV|||  
BAL|british anti-lewisite|C0012383|||C0012383|CHV|||  
BAL|bronchoalveolar|||1|0.0078|  
BAL|bronchoalveolar  
lavage|C0189381;C0396473;C1535502|1|0.914|C0189381;C1535502|CHV;CSP;MSH;MTH;NCI;  
PDQ;SNOMEDCT|1|0.9023|1  
BAL|bronchoalveolar lavage  
fluid|C0006279|||C0006279|MSH;MTH;NCI;SNOMEDCT|1|0.0302|  
BAL|dimercaprol|C0012383|||C0012383|CHV|||  
BAL|dimercaptopropanol|C0012383|||1|0.0032|  
BAL|poly (ADP-ribose) polymerase family, member 9|C1538586|||C1538586|HUGO|||  
BIPAP|bilevel positive airway pressure|||1|1.000|||1  
BIPAP|positive airway pressure|||1|0.9541|  
BIPAP|positive airway pressure ventilation|||1|0.0459|  
BKA|Bka|C1426785|||C1426785|HUGO|||  
BKA|CGI-35|C1426785|||C1426785|HUGO|||  
BKA|FCF1|C1426785|||C1426785|HUGO|||  
BKA|FCF1 gene|C1426785|||C1426785|HUGO;MTH|||  
BKA|FCF1 small subunit (SSU) processome component homolog (S.  
cerevisiae)|||C1426785|HUGO|||  
BKA|below-knee amputation|C0002692|1|1.000|C0002692|NCI|1|0.5714|1  
BKA|bongkrelic acid|C0005982|||C0005982|MSH;NDFRT|1|0.4286|  
BK|Arg Pro Pro Gly Phe Ser Pro Phe Arg|||C0006100|MSH|||  
BK|Arg-Pro-Pro-Gly-Phe-Ser-Pro-Phe-Arg|||C0006100|MSH;NDFRT|||  
BK|BA|||C0006036|NCI|||  
BK|BIH|C0006036|||C0006036|NCI|||  
BK|BK|C0006100|||C0006036;C0006100|NCI;OMIM|||  
BK|BK (virus)|C0005670|1|0.686|||1  
BK|BOSNIA-HERZEGOVINA|C0006036|||C0006036|NCI|||  
BK|BRADYKININ|C0006100;C1537501|||C0006100|OMIM|||  
BK|Bosnia|C0006036|||C0006036|MSH|||  
BK|Bosnia - Herzegovina|C0006036|||C0006036|SNOMEDCT|||  
BK|Bosnia - Herzegovina (geographic location)|||C0006036|SNOMEDCT|||  
BK|Bosnia and Herzegovina|||C0006036|MSH|||  
BK|Bosnia and Herzegovina|||C0006036|MSH;NCI|||  
BK|Bosnia-Herzegovina|C0006036|||C0006036|CSP|||  
BK|Bosnia-Herzegovina|C0006036|||C0006036|AOD;MSH;MTH;NCI|||  
BK|Bradykinin|C0006100;C1537501|||C0006100|LCH;LNC;MSH;MTH;NCI;NDFRT;SNOMEDCT|||  
BK|Bradykinin [Chemical/Ingredient]|||C0006100|NDFRT|||  
BK|Ca(2+)-activated K(+)|||1|0.0189|  
BK|Herzegovina|C0006036|||C0006036|CSP|||

BK|K+ channel|||||1|0.0072|  
BK|Kallidin I|C0006100|||C0006100|SNOMEDCT|||  
BK|Kallidin I (substance)|||C0006100|SNOMEDCT|||  
BK|back|C0004600;C0205095;C0460009;C1281593;C1995000|||||1  
BK|below knee||1|0.314|||||1  
BK|below the knee|||||1|0.0011|  
BK|below-knee|||||1|0.0256|  
BK|berkelium|C0005124|||||1  
BK|bosnia|C0006036|||C0006036|CHV|||  
BK|bovine kidney|||||1  
BK|bradykinin|C0006100;C1537501|||C0006100;C0006101;C1537501|AOD;CHV;CSP;HUGO;LC  
H;LNC;MSH;MTH;NCI;NDFRT;OMIM;SNOMEDCT|1|0.9115|1  
BK|bradykinins|C0006100;C0006101|||C0006100|CHV|||  
BK|bullous keratopathy|C0155111|||||1  
BK|calcium-activated potassium channels|||||1|0.0028|  
BK|kallidin 9|C0006100|||C0006100|CSP|||  
BK|kallidin I|C0006100|||C0006100|CSP|||  
BK|large conductance|||||1|0.0117|  
BK|large-conductance Ca2+-activated K+|||||1|0.0122|  
BK|large-conductance calcium-activated potassium|||||1|0.005|  
BK|potassium channel|C0032824|||||1|0.0039|  
BMI|BMI|||C0005893;C1305855;C1542867|AOD;CHV;CSP;LNC;NCI;OMIM|||  
BMI|BMI - Body mass index|C1305855|||C1305855|SNOMEDCT|||  
BMI|BODY MASS INDEX|C0005893;C1305855|||C1305855|OMIM|||  
BMI|Body Mass Index|C0005893;C1305855|||C0005893;C1305855|MSH;NCI|||  
BMI|Body Mass Indices|||||1|0.0049|  
BMI|Body mass index|C0005893;C1305855|||C1305855|LNC;MTH;SNOMEDCT|||  
BMI|Body mass index (BMI) [Ratio]||||C1542867|LNC|||  
BMI|Body mass index (observable entity)|||C1305855|SNOMEDCT|||  
BMI|Body mass index - observation|||C1305855|SNOMEDCT|||  
BMI|Body mass index [dup] (observable entity)|||C1305855|SNOMEDCT|||  
BMI|Body mass index procedure|C0005893|||C0005893|MTH|||  
BMI|Body mass index, NOS|C0005893;C1305855|||C1305855|SNOMEDCT|||  
BMI|Body mass index:Ratio:Pt:^Patient:Qn||||C1542867|LNC|||  
BMI|Body mass index:Relative Density:Point in  
time:^Patient:Quantitative||||C1542867|LNC;MTH|||  
BMI|Bone marrow involvement|C1517677|||||1|0.0009|  
BMI|Index, Body Mass|C0005893;C1305855|||C0005893|MSH|||  
BMI|Index, Quetelet|C0005893;C1305855|||C0005893|MSH|||  
BMI|Quetelet Index|C0005893;C1305855|||C0005893;C1305855|MSH;NCI|||  
BMI|Quetelet index|C0005893;C1305855|||C1305855|SNOMEDCT|||  
BMI|Quetelet index (observable entity)|||C1305855|SNOMEDCT|||  
BMI|Quetelet's Index|C0005893;C1305855|||C0005893|MSH|||  
BMI|Quetelets Index|C0005893|||C0005893|MSH|||  
BMI|bicuculline methiodide|C0053558|||||1|0.0133|1  
BMI|biomedical informatics|||||1  
BMI|body mass  
index|C0005893;C1305855|1|0.994|C0005893;C1305855;C2240399|AOD;CHV;CSP;ICD9CM;LN  
C;MSH;MTH;NCI;OMIM;SNOMEDCT|1|0.9793|1  
BMI|body mass index (BMI)|C0005893;C1305855|||C0005893;C1305855|CHV|||  
BMI|body weight|C0005910;C1305866|||||1|0.0006|  
BMI|brain-machine interface|||||1|0.0009|  
BMI|quetelet index|C0005893;C1305855|||C0005893;C1305855|CHV|||  
BMP|BCNU|C0053932;C0279266|||C0279266|NCI;PDQ|||  
BMP|BMP|C0053932;C0279266|||C0053932;C0279266|CSP;NCI;PDQ|||  
BMP|Bone Morphogenetic Protein|C0053932|||C0053932|MSH;NCI;NDFRT|||  
BMP|Bone Morphogenetic Proteins|C0053932|||C0053932|MSH;MTH;NDFRT|||

BMP|Bone Morphogenetic Proteins [Chemical/Ingredient]|||C0053932|NDFRT|||  
BMP|Carmustine/Methotrexate/Procarbazine|||C0279266|NCI|||  
BMP|Morphogenetic Protein, Bone|C0053932|||C0053932|MSH|||  
BMP|Morphogenetic Proteins, Bone|C0053932|||C0053932|MSH|||  
BMP|basic metabolic profile||1|0.912|||1  
BMP|behavior management plan|||1  
BMP|bmp|C0053932;C0279266|||C0053932|CHV|||  
BMP|bone marrow pressure|||1  
BMP|bone morphogenetic  
protein|C0053932|1|0.014|C0053932|CHV;CSP;MSH;NCI;NDFRT|1|1|1  
BMP|bone morphogenetic proteins|C0053932|||C0053932|CHV|||  
BMP|carmustine/methotrexate/procarbazine|||C0279266|PDQ|||  
BMP|carmustine/methotrexate/procarbazine protocol|C0279266|||C0279266|MTH|||  
BM|BD|||C0005126|NCI|||  
BM|BERMUDA|C0005126|||C0005126|NCI|||  
BM|BM|||C0005126;C0006416;C0011135;C1704651|MEDLINEPLUS;NCI|||  
BM|BMU|C0005126|||C0005126|NCI|||  
BM|Barrett's metaplasia|C1862318|||1|0.0037|  
BM|Bergersen medium|||1  
BM|Bermuda|C0005126|||C0005126|AOD;MSH;MTH;NCI;SNOMEDCT|||  
BM|Bermuda (geographic location)|||C0005126|SNOMEDCT|||  
BM|Bermuda Islands|C0005126|||C0005126|NCI|||  
BM|Bermudas|C0005126|||C0005126|NCI|||  
BM|Birma|C0006416|||C0006416|AOD|||  
BM|Bohr magneton|||1  
BM|Bombyx mori|C0323309|||1|0.0018|  
BM|Bone Measurements|C1704651|||C1704651|NCI|||  
BM|Bone Measurements Domain|C1704651|||C1704651|NCI|||  
BM|Bone Mineral Density Data Domain|C1704651|||C1704651|MTH|||  
BM|Bone marrow|C0005953|||1|0.7803|  
BM|Bowel Function|C0011135|||C0011135|NCI|||  
BM|Bowel Movement|C0011135|||C0011135|MEDLINEPLUS|||  
BM|Bowel action|C0011135|||C0011135|SNOMEDCT|||  
BM|Bowel action (observable entity)|||C0011135|SNOMEDCT|||  
BM|Bowel function|C0011135|||C0011135|SNOMEDCT|||  
BM|Bowel habit|C0011135|||C0011135|SNOMEDCT|||  
BM|Bowel habits|C0011135|||C0011135|SNOMEDCT|||  
BM|Bowel habits, NOS|C0011135|||C0011135|SNOMEDCT|||  
BM|Bowel motion - function|C0011135|||C0011135|SNOMEDCT|||  
BM|Bowel movements|C0011135|||C0011135|SNOMEDCT|||  
BM|Burma|C0006416|||C0006416|AOD;CSP;LCH;MSH;NCI;SNOMEDCT|||  
BM|Burma (geographic location)|||C0006416|SNOMEDCT|||  
BM|Defaecation|C0011135|||C0011135|SNOMEDCT|||  
BM|Defecation|C0011135|||C0011135|LCH;MSH;MTH;NCI;SNOMEDCT|||  
BM|Defecation (function)|||C0011135|SNOMEDCT|||  
BM|Defecation (observable entity)|||C0011135|SNOMEDCT|||  
BM|Defecation, NOS|C0011135|||C0011135|SNOMEDCT|||  
BM|Defecation, function (observable entity)|||C0011135|SNOMEDCT|||  
BM|Defecations|C0011135|||C0011135|MSH|||  
BM|MM|C0439190|||C0006416|NCI|||  
BM|MMR|||C0006416|NCI|||  
BM|MYANMAR|C0006416|||C0006416|NCI|||  
BM|Myanma|C0006416|||C0006416|MSH|||  
BM|Myanmar|C0006416|||C0006416|AOD;MSH;MTH;NCI|||  
BM|Normal defecation|C0011135|||C0011135|SNOMEDCT|||  
BM|Passes stool completely|||C0011135|SNOMEDCT|||  
BM|Passes stool completely (finding)|||C0011135|SNOMEDCT|||

BM|Union of Myanmar|C0006416|||C0006416|NCI;SNOMEDCT|||  
BM|bacterial meningitis|C0085437|||1|0.0094|1  
BM|basal medium|||1|0.0018|1  
BM|basal membrane|||1|1  
BM|basal metabolism|C0678121|||1|1  
BM|basement membrane|C0004799|||1|0.1198|1  
BM|basilar membrane|C0004816|||1|0.024|1  
BM|bermuda|C0005126|||C0005126|CHV|||  
BM|betamethasone|C0005308|||1|0.0039|  
BM|bicuculline methiodide|C0053558|||1|0.0018|  
BM|biological monitoring|C0005517|||1|0.0022|  
BM|biomedical|C1879848|||1|1  
BM|bleomycin|C0005740|||1|0.0057|  
BM|blind matching|||1|1  
BM|blood meal|||1|0.0049|  
BM|blood monitoring|||1|1  
BM|blood monocyte|C0026473|||1|1  
BM|body mass|C0518010|||1|0.0199|1  
BM|bone marrow|C0005953|1|0.028|||1  
BM|bone marrow cells|C0005955|||1|0.0026|  
BM|bone metastases|C0153690|||1|0.0033|  
BM|bone metastasis|C0153690|||1|0.002|1  
BM|bowel action|C0011135|||C0011135|CHV|||  
BM|bowel function|C0011135|||C0011135|CHV;NCI|||  
BM|bowel functioning|C0011135|||C0011135|CHV|||  
BM|bowel habit|C0011135|||C0011135|CHV|||  
BM|bowel habits|C0011135|||C0011135|CHV|||  
BM|bowel movement|C0011135|1|0.918|C0011135|AOD;CHV;CSP;NCI|||1  
BM|bowel movements|C0011135|||C0011135|CHV|||  
BM|bowels movement|C0011135|||C0011135|CHV|||  
BM|bowels movements|C0011135|||C0011135|CHV|||  
BM|brain metastases|C0220650|||1|0.0061|  
BM|breast milk|C0026131;C0026140|1|0.050|||1|0.0018|1  
BM|bronchial mucosa|C0225600|||1|0.0012|  
BM|buccal mass|||1|1  
BM|buccal mucosa|C0026639;C1280540;C1578559|||1|0.0016|  
BM|buccomesial|||1|1  
BM|bullous myringitis|C0155461|||1|1  
BM|burma|C0006416|||C0006416|CHV|||  
BM|butadiene monoxide|C0047001|||1|0.002|  
BM|defaecation|C0011135|||C0011135|CHV|||  
BM|defecation|C0011135|||C0011135|AOD;CHV;GO;NCI|||  
BM|myanmar|C0006416|||C0006416|CHV|||  
BM|stool passing|C0011135|||C0011135|CHV|||  
BMT|BMT|C0005961|||C0005961|CSP;NCI;PDQ|||  
BMT|BMT - Bone marrow transplant|C0005961|||C0005961|SNOMEDCT|||  
BMT|BONE MARROW TRANSPL|||C0005961|MSH|||  
BMT|BONE MARROW TRANSPLANT|C0005961|||C0005961|COSTAR;DXP|||  
BMT|Basic Military Training|||1|0.0031|  
BMT|Bone Marrow Grafting|C0005961|||C0005961|MSH;NCI|||  
BMT|Bone Marrow Transplant|C0005961|||C0005961|NCI|1|0.1523|  
BMT|Bone Marrow Transplantation|C0005961|||C0005961|MEDLINEPLUS;MSH;MTH;NCI|||  
BMT|Bone marrow graft|C0005961|||C0005961|SNOMEDCT|||  
BMT|Bone marrow transplant|C0005961|||C0005961|CCS;SNOMEDCT|||  
BMT|Bone marrow transplant (procedure)|||C0005961|SNOMEDCT|||  
BMT|Bone marrow transplant, not otherwise specified|C0005961|||C0005961|ICD9CM|||

BMT|Bone marrow transplanted|||||1|0.0017|  
BMT|Bone marrow trnsplnt NOS||||C0005961|ICD9CM|||  
BMT|Buschke Memory Test|||||1|  
BMT|Graft of bone marrow NOS|C0005961|||C0005961|SNOMEDCT|||  
BMT|Graft of bone marrow NOS (procedure)|||C0005961|SNOMEDCT|||  
BMT|Grafting of bone marrow NOS|C0005961|||C0005961|SNOMEDCT|||  
BMT|Grafting of bone marrow NOS (procedure)|||C0005961|SNOMEDCT|||  
BMT|Grafting, Bone Marrow|C0005961|||C0005961|MSH|||  
BMT|Marrow Transplantation|C0005961|||C0005961|NCI|||  
BMT|TRANSPL BONE MARROW||||C0005961|MSH|||  
BMT|Transplantation of bone marrow|C0005961|||C0005961|SNOMEDCT|||  
BMT|Transplantation of bone marrow (procedure)|||C0005961|SNOMEDCT|||  
BMT|Transplantation of bone marrow, NOS|C0005961|||C0005961|SNOMEDCT|||  
BMT|Transplantation, Bone Marrow|C0005961|||C0005961|MSH|||  
BMT|basement membrane thickening|C0544995|||||1|  
BMT|basement membrane thickness|||||1|0.0023|1|  
BMT|behavioral marital therapy|||||1|0.0038|1|  
BMT|benign mesenchymal tumor|||||1|  
BMT|bilateral myringotomy tubes|||||1|  
BMT|bmt|C0005961|||C0005961|CHV|||  
BMT|bone marrow|C0005953|||||1|0.0046|  
BMT|bone marrow graft|C0005961|||C0005961|CHV|||  
BMT|bone marrow grafting|C0005961|||C0005961|CHV|||  
BMT|bone marrow transplant|C0005961|1|1.000|C0005961|CHV|||1|  
BMT|bone marrow transplant (BMT)|C0005961|||C0005961|CHV|||  
BMT|bone marrow transplant bmt|C0005961|||C0005961|CHV|||  
BMT|bone marrow  
transplantation|C0005961|||C0005961|CHV;CSP;MEDLINEPLUS;MSH;MTH;NCI;PDQ|1|0.8322  
|  
BMT|bone marrow transplantations|C0005961|||C0005961|CHV|||  
BMT|bone marrow transplants||||C0005961|CHV|||  
BMT|transplantation, bone marrow|C0005961|||C0005961|PDQ|||  
BNP|B-Type Natriuretic Peptide|C0054015;C1095989|||C1095989|NCI|||  
BNP|B-type natriuretic peptide|C0054015;C1095989|||||1|0.954|  
BNP|BNP|C1095989;C1417808;C2982014|||C1095989;C1417808;C2982014|NCI;OMIM|||  
BNP|Brain Natriuretic Peptide|C0054015|||C1095989|NCI|||  
BNP|Brain Natriuretic Peptide Measurement|C1095989|||C1095989|NCI|||  
BNP|Brain natriuretic peptide level|C1095989|||C1095989|SNOMEDCT|||  
BNP|Brain natriuretic peptide level (procedure)|||C1095989|SNOMEDCT|||  
BNP|Brain natriuretic peptide measurement|C1095989|||C1095989|MTH;SNOMEDCT|||  
BNP|Brain natriuretic peptide measurement (procedure)|||C1095989|SNOMEDCT|||  
BNP|NATRIURETIC PEPTIDE PRECURSOR B|C1417808|||C1417808|OMIM|||  
BNP|NATRIURETIC PEPTIDE, BRAIN TYPE|C1417808|||C1417808|OMIM|||  
BNP|NPPB|C0049330;C1417808|||C1417808|HUGO;NCI;OMIM|||  
BNP|NPPB Gene|C1417808|||C1417808|NCI|||  
BNP|NPPB gene|C1417808|||C1417808|HUGO;MTH|||  
BNP|NPPB wt Allele|C2982014|||C2982014|MTH;NCI|||  
BNP|Natriuretic Peptide Precursor B Gene|C1417808|||C1417808|NCI|||  
BNP|Natriuretic Peptide Precursor B wt Allele|C2982014|||C2982014|NCI|||  
BNP|beta-natriuretic peptide||1|0.964||||1|  
BNP|brain natriuretic  
peptide|C0054015|||C0054015;C1095989|CHV;MSH;NCI;NDFRT;SNOMEDCT|||  
BNP|brain natriuretic peptide (BNP) level test||||C1095989|CHV|||  
BNP|brain natriuretic peptides|C0054015|||||1|0.046|  
BNP|natriuretic peptide B|C1317554;C1417808|||C1417808|HUGO|||  
BOOP|BOOP|C0242770|||C0242770|MSH;NCI;NDFRT;SNOMEDCT|||

BOOP|BOOP - Bronchiolitis obliterans and organising  
pneumonitis|||C0242770|SNOMEDCT|||  
BOOP|BOOP - Bronchiolitis obliterans and organizing  
pneumonitis|||C0242770|SNOMEDCT|||  
BOOP|Bronchiolitis Obliterans Organizing  
Pneumonia|C0242770|||C0242770|MSH;MTH;NCI;NDFRT|||  
BOOP|Bronchiolitis obliterans and organising pneumonitis|||C0242770|SNOMEDCT|||  
BOOP|Bronchiolitis obliterans and organizing pneumonitis|||C0242770|SNOMEDCT|||  
BOOP|Bronchiolitis obliterans organising  
pneumonia|C0242770|||C0242770|SNOMEDCT|||  
BOOP|Bronchiolitis obliterans organizing  
pneumonia|C0242770|||C0242770|SNOMEDCT|||  
BOOP|Bronchiolitis obliterans organizing pneumonia  
(disorder)|||C0242770|SNOMEDCT|||  
BOOP|Bronchiolitis obliterans with organising  
pneumonia|C0242770|||C0242770|SNOMEDCT|||  
BOOP|Bronchiolitis obliterans with organizing  
pneumonia|C0242770|||C0242770|SNOMEDCT|1|1|  
BOOP|COP|C0086825|||C0242770|NCI|||  
BOOP|COP - Cryptogenic organising pneumonitis|||C0242770|SNOMEDCT|||  
BOOP|COP - Cryptogenic organizing pneumonitis|||C0242770|SNOMEDCT|||  
BOOP|Cryptogenic Organizing Pneumonia|C0242770|||C0242770|MSH;NCI;NDFRT|||  
BOOP|Cryptogenic Organizing Pneumonia [Disease/Finding]|||C0242770|NDFRT|||  
BOOP|Cryptogenic Organizing Pneumonias|C0242770|||C0242770|MSH|||  
BOOP|Cryptogenic organising pneumonia|C0242770|||C0242770|SNOMEDCT|||  
BOOP|Cryptogenic organising pneumonitis|C0242770|||C0242770|SNOMEDCT|||  
BOOP|Cryptogenic organiz pneu|||C0242770|ICD9CM|||  
BOOP|Cryptogenic organizing pneumonia|C0242770|||C0242770|ICD9CM;SNOMEDCT|||  
BOOP|Cryptogenic organizing pneumonitis|C0242770|||C0242770|SNOMEDCT|||  
BOOP|Organizing Pneumonia, Cryptogenic|C0242770|||C0242770|MSH|||  
BOOP|Organizing Pneumonias, Cryptogenic|C0242770|||C0242770|MSH|||  
BOOP|Pneumonia, Cryptogenic Organizing|C0242770|||C0242770|MSH|||  
BOOP|Pneumonias, Cryptogenic Organizing|C0242770|||C0242770|MSH|||  
BOOP|boop|C0242770|||C0242770|CHV|||  
BOOP|bronchiolitis obliterans organizing pneumonia  
(BOOP)|C0242770|||C0242770|CHV|||  
BOOP|bronchiolitis obliterans-organizing pneumonia|C0242770|1|1.000|||1|  
BOOP|cryptogenic organizing pneumonia|C0242770|||C0242770|CHV|||  
BPH|BEP - Benign enlargement of prostate|C0005001|||C0005001|SNOMEDCT|||  
BPH|BPH|C0005001;C1704272|||C0005001;C1704272|CHV;DXP;MEDLINEPLUS;NCI;OMIM;PDQ;S  
NOMEDCT|||  
BPH|BPH - Benign prostatic hypertrophy|C0005001|||C0005001|SNOMEDCT|||  
BPH|BPH - benign prostatic hypertrophy|C0005001|||C0005001|SNOMEDCT|||  
BPH|Benign Hyperplasia of Prostate|C1704272|||C1704272|NCI|||  
BPH|Benign Hyperplasia of the Prostate|C1704272|||C1704272|NCI|||  
BPH|Benign Prostate Hyperplasia|C0005001;C1704272|||C1704272|NCI|||  
BPH|Benign Prostatic  
Hyperplasia|C0005001;C1704272;C2937421|||C1704272|MSH;MTH;NCI|||  
BPH|Benign Prostatic Hyperplasia - BPH|C0005001|||C0005001|NCI|||  
BPH|Benign Prostatic  
Hypertrophy|C0005001|||C0005001|COSTAR;MEDLINEPLUS;MSH;NCI|||  
BPH|Benign enlargement of prostate|C0005001|||C0005001|SNOMEDCT|||  
BPH|Benign enlargement of prostate, NOS|C0005001|||C0005001|SNOMEDCT|||  
BPH|Benign hypertrophy of prostate NOS|C0005001|||C0005001|MTHICD9|||  
BPH|Benign prostatic hyper.|||C0005001|SNOMEDCT|||  
BPH|Benign prostatic  
hyperplasia|C0005001;C1704272;C2937421|||C1704272|SNOMEDCT|||

BPH|Benign prostatic hyperplasia (disorder)|||C1704272|SNOMEDCT|||  
BPH|Benign prostatic hyperplasia,  
NOS|C0005001;C1704272;C2937421|||C1704272|SNOMEDCT|||  
BPH|Benign prostatic  
hypertrophy|C0005001|||C0005001|ICPC;MTH;MTHICD9;SNOMEDCT|||  
BPH|Brown Planthopper|||||1|0.0034|  
BPH|Enlarged prostate - benign|||C0005001|SNOMEDCT|||  
BPH|Hypertrophy (benign) of prostate|||C0005001|ICD9CM|||  
BPH|Hypertrophy, Benign Prostatic|C0005001|||C0005001|MSH|||  
BPH|Hypertrophy-prost.ben.||||C0005001|SNOMEDCT|||  
BPH|Nodular hyperplasia of prostate  
gland|C1704272;C2937421|||C1704272|SNOMEDCT|||  
BPH|PROSTATE, HYPERTROPHY, BENIGN|C0005001|||C0005001|DXP|||  
BPH|PROSTATIC HYPERPLASIA BENIGN <PROSTATISM>|||C1704272|QMR|||  
BPH|PROSTATIC HYPERPLASIA, BENIGN|C0005001;C1704272;C2937421|||C1704272|OMIM|||  
BPH|Prostatic Hyperplasia, Benign|C0005001;C1704272;C2937421|||C1704272|MSH|||  
BPH|Prostatic Hypertrophy, Benign|C0005001|||C0005001|MSH|||  
BPH|Prostatic hyper -benign||||C0005001|SNOMEDCT|||  
BPH|bacteriopheophytin|C0052909|||||1|0.0038|1  
BPH|benign enlarged prostate|C0005001|||C0005001|CHV|||  
BPH|benign hyperplasia of the prostate|C1704272|||||1|0.0061|  
BPH|benign hyperplastic|||||1|0.0041|  
BPH|benign prostate enlargement|C0005001|||C0005001|CHV|||  
BPH|benign prostate hyperplasia|C0005001;C1704272|||C0005001;C1704272|CHV;CSP|||  
BPH|benign prostate hypertrophy|C0005001|||C0005001|CHV|||  
BPH|benign prostatic  
hyperplasia|C0005001;C1704272;C2937421|1|1.000|C0005001;C1704272|CHV;CSP;LNC;MSH  
;MTH;NCI;PDQ;SNOMEDCT|1|0.8443|1  
BPH|benign prostatic hyperplasia  
(BPH)|C0005001;C1704272;C2937421|||C0005001|CHV|||  
BPH|benign prostatic  
hypertrophy|C0005001|||C0005001|CHV;COSTAR;ICPC;MEDLINEPLUS;MSH;MTH;MTHICD9;NCI;  
SNOMEDCT|1|0.1329|  
BPH|benzo[a]pyrene hydroxylase|C0005080|||||1|0.0034|  
BPH|buccopharyngeal|||||1|  
BPH|hyperplastic prostate tissue|||||1|0.002|  
BPH|prostate hyperplasia|C0005001;C2937421|||C0005001|CHV|||  
BPH|prostate hypertrophy|C0005001;C1739363|||C0005001|CHV|||  
BPH|prostatic hyperplasia|C0005001;C2937421|||C0005001|CHV|||  
BPH|prostatic hypertrophy|C0005001;C1739363;C2937421|||C0005001|CHV|||  
BPP|BPP|C1845668|||C1845668|OMIM|||  
BPP|Bloembergen, Purcell, Pound|||||1|  
BPP|CBPS|C1845668|||C1845668|OMIM|||  
BPP|Congenital bilateral perisylvian  
syndrome|C1845668|||C1845668|MSH;SNOMEDCT|||  
BPP|Congenital bilateral perisylvian syndrome (disorder)|||C1845668|SNOMEDCT|||  
BPP|PERISYLVIAN SYNDROME, CONGENITAL BILATERAL|C1845668|||C1845668|OMIM|||  
BPP|PMGX|C1845668|||C1845668|OMIM|||  
BPP|POLYMICROGYRIA, BILATERAL PERISYLVIAN|C1845668|||C1845668|OMIM|||  
BPP|Perisylvian syndrome|C1845668|||C1845668|MSH|||  
BPP|Perisylvian syndrome, congenital bilateral|C1845668|||C1845668|MSH|||  
BPP|Polymicrogyria, bilateral perisylvian|C1845668|||C1845668|MSH|||  
BPP|binding protein protease|||||1|  
BPP|biophysical profile||1|1.000||1|0.2754|1  
BPP|bovine PP|||||1|0.1014|  
BPP|bovine pancreatic polypeptide|||||1|0.6232|1  
BPP|brachial plexus paralysis|C0541435|||||1|

BPP|bradykinin potentiating peptide|||||||1  
BPP|breast parenchymal pattern|||||||1  
BP|72-base-pair|||||||1|0.0007|  
BP|BLEO/CDDP|||||C0057191|NCI;PDQ|||  
BP|BLOOD PRESSURE|C0005823;C1271104;C1272641|||C0005823|MTH|||  
BP|BP|C2986841|||C0005823;C0005824;C0037623;C0057191;C2986841|CHV;NCI;PDQ|||  
BP|BP - Blood pressure|C0005823|||C0005823|SNOMEDCT|||  
BP|Back-Propagation|||||||1|0.0014|  
BP|Bell palsy|C0015469;C0376175|||||||1  
BP|Bell's palsy|C0015469;C0376175|||||||1|0.0008|  
BP|Bereitschaftspotential|C1704305|||||||1|0.0057|  
BP|Binding Potential|C2986841|||C2986841|MTH;NCI|||  
BP|Bisphosphonates|C0012544|||||||1|0.0019|  
BP|Bleomycin/Cisplatin|||||C0057191|NCI|||  
BP|Blood  
Pressure|C0005823;C1271104;C1272641|||C0005823;C0005824|MEDLINEPLUS;MSH;MTH;NCI|  
||  
BP|Blood Pressure Determination|C0005824|||C0005824|MSH|||  
BP|Blood Pressure Determinations|C0005824|||C0005824|MSH|||  
BP|Blood  
pressure|C0005823;C1271104;C1272641|||C0005823|LCH;LNC;SNOMEDCT|1|0.7013|  
BP|Blood pressure (observable entity)|||C0005823|SNOMEDCT|||  
BP|Blood pressure determination|C0005824|||C0005824|MTH|||  
BP|Blood pressure taking|C0005824|||C0005824|SNOMEDCT|||  
BP|Blood pressure taking (procedure)|||C0005824|SNOMEDCT|||  
BP|Blood pressure taking, NOS|C0005824|||C0005824|SNOMEDCT|||  
BP|Blood pressure, NOS|C0005823;C1271104;C1272641|||C0005823|SNOMEDCT|||  
BP|Bolton point|||||||1  
BP|Bordetella pertussis|C0006017|||||||1|0.0022|  
BP|Bp|C2986841|||C1841672|OMIM|||  
BP|Bp (binding peptide) haptoglobin beta polypeptide chain  
locus|||C1841672|MTH|||  
BP|British Pharmacopoeia|||||||1|0.0011|  
BP|DDP-BLM protocol|C0057191|||C0057191|MSH|||  
BP|Determination, Blood Pressure|C0005824|||C0005824|MSH|||  
BP|Determinations, Blood Pressure|C0005824|||C0005824|MSH|||  
BP|Pharmacopoeia Britannica|||||||1  
BP|Pressure, Blood|C0005823;C1271104;C1272641|||C0005823|MSH|||  
BP|SB|||||C0037623|NCI|||  
BP|SLB|C0037623;C1825575|||C0037623|NCI|||  
BP|SOLOMON ISLANDS|C0037623|||C0037623|NCI|||  
BP|Solomon Islands|C0037623|||C0037623|AOD;MSH;MTH;NCI|||  
BP|Solomon islands|C0037623|||C0037623|SNOMEDCT|||  
BP|Solomon islands (geographic location)|||C0037623|SNOMEDCT|||  
BP|Systolic and diastolic blood pressures|||||||1|0.0014|  
BP|[3H]benzo[a]pyrene|||||||1|0.0011|  
BP|bacillary peliosis|C0343770|||||||1  
BP|back pressure|||||||1  
BP|backpropagation|||||||1|0.0012|  
BP|bacterial pneumonia|C0004626|||||||1|0.0007|  
BP|barometric pressure|C0237510|||||||1  
BP|base pair|C0600436|||||||1  
BP|base pairs|C0600436|||||||1|0.1502|  
BP|basepairs|C0600436|||||||1|0.0079|  
BP|basic protein|||||||1  
BP|basilar papilla|C1136024|||||||1|0.0013|  
BP|bathroom privileges|||||||1

BP|bed pan|C0179263|||1  
BP|beet pulp|||1|0.0008|  
BP|before polarization|||1  
BP|before present|||1  
BP|behavior pattern|C0018464|||1  
BP|bench press|C0454326|||1|0.0013|  
BP|benz(a)pyrene|||1|0.0027|  
BP|benzo(a)pyrene|C0005052|||1|0.0207|  
BP|benzo[alpha]pyrene|C1507317|||1|0.0028|  
BP|benzophenone|C0053233|||1|0.0014|  
BP|benzoyl peroxide|C0005088|||1|0.0023|1  
BP|benzpyrene|C0005097|||1  
BP|benzylpenicillin|C0030827|||1|0.0021|  
BP|bereitschaftspotential|C1704305|||C1704305|MSH|||  
BP|beta-protein|C1750295;C2362547|||1  
BP|biliopancreatic||1|0.006|||1  
BP|binding potential|C2986841|||C2986841|MTH;NCI|1|0.0092|  
BP|binding protein|C0242210|||1|0.0066|1  
BP|bioequivalence problem|||1  
BP|biotic potential|||1  
BP|biparietal|||1  
BP|biphenyl|C0058372|||1|0.0014|1  
BP|bipolar|C0443156|||1|0.0043|1  
BP|bipolar affective disorder|C0005586|||1|0.0009|  
BP|bipolar disorder|C0005586|||1|0.0042|  
BP|birthplace|C0805310;C3202966|||1  
BP|bladder pressure|||1  
BP|blastic phase|||1|0.0022|  
BP|bleomycin/cisplatin|||C0057191|PDQ|||  
BP|bleomycin/cisplatin protocol|C0057191|||C0057191|MTH|||  
BP|blood plasma|C0032105|||1|0.0012|  
BP|blood  
pressure|C0005823;C1271104;C1272641|1|0.992|C0005823;C0005824|AOD;CHV;CSP;NCI|1|  
0.0016|1  
BP|blood pressure determination|C0005824|||C0005824|AOD;CHV|||  
BP|bodily pain|||1|0.0015|1  
BP|body part|C0229962|||1  
BP|body plethysmography|C0032224|||1  
BP|boiling point|C1257887|||C1257887|AOD;CHV|||1  
BP|borderline personality|C0006012|||1  
BP|bovine pericardium|||1|0.0015|  
BP|bowenoid papulosis|C0334106|||1|0.0016|1  
BP|brachial plexus|C0006090;C1278841|||1|0.0008|  
BP|breech presentation|C0006157|||1  
BP|brevipedicellus|||1|0.0008|  
BP|bronchopleural|C0450194;C0545668|||1  
BP|bronchopulmonary|C0545675|||1  
BP|buccopalpal|||1  
BP|bullous pemphigoid|C0030805|||1|0.0335|  
BP|bullous pemphigus|C0262398|||1  
BP|bypass|C0741847|||1  
BP|metabolism of benzo[a]pyrene|||1|0.0029|  
BP|myelin basic protein|C0014063;C1417057|||1|0.0113|  
BP|point|C1552961;C2347617|||1|0.0014|  
BP|take blood pressure|||C0005824|CHV|||  
BP|taking blood pressure|C0005824|||C0005824|CHV|||  
BP|total biopterin|||1|0.0004|

BSO|2-Amino-4-(S-butylsulfonimidoyl) Butanoic Acid|||C0054252|NCI;PDQ|||  
BSO|BSO|C0054252|||C0054252|NCI;PDQ|||  
BSO|Butanoic Acid, 2-Amino-4-(S-butylsulfonimidoyl)-|||C0054252|NCI;PDQ|||  
BSO|Butanoic acid, 2-amino-4-(S-butylsulfonimidoyl)-  
|||C0054252|MSH;NCI;NDFRT|||  
BSO|Buthionine Sulfoximine|C0054252|||C0054252|MSH;NCI;NDFRT|||  
BSO|Buthionine Sulfoximine [Chemical/Ingredient]|||C0054252|NDFRT|||  
BSO|Buthionine Sulphoximine|C0054252|||C0054252|NCI;PDQ|||  
BSO|D,L-buthionine-S,R-sulfoximine|||1|0.0203|  
BSO|DL-buthionine-S,R-sulfoximine|||1|0.0457|  
BSO|L-Buthionine Sulfoximine|C0054252|||C0054252|NCI;PDQ|||  
BSO|L-Buthionine sulfoximine|C0054252|||C0054252|NCI|||  
BSO|L-buthionine-(S,R)-sulfoximine|||1|0.1624|  
BSO|L-buthionine-SR-sulfoximine|||1|0.0165|  
BSO|R-sulfoximine|||1|0.0178|  
BSO|S-(3-Amino-3-carboxypropyl)-S-butylsulfoximine|||C0054252|NCI;PDQ|||  
BSO|S-(n-Butyl)homocysteine Sulfoximine|||C0054252|NCI;PDQ|||  
BSO|Sulfoximine, Buthionine|C0054252|||C0054252|MSH|||  
BSO|behavior, speech, other syndromes|||1|  
BSO|bilateral sagittal osteotomy|||1|  
BSO|bilateral salpingo-  
oophorectomy|C0195495|1|1.000|C0195495|CHV;ICD9CM;NCI;SNOMEDCT|||1  
BSO|bilateral serous otitis|||1|  
BSO|bile salt output|||1|  
BSO|buthionine sulfoximide|||1|0.0114|  
BSO|buthionine sulfoximine|C0054252|||C0054252|CSP;MSH;NCI;NDFRT;PDQ|1|0.6434|  
BSO|buthionine sulphoximine|C0054252|||1|0.0825|  
BSO|d,l-Buthionine-s,r-sulfoximine|||C0054252|NCI;PDQ|||  
BUN|BUN|||C0005845;C0600137|AOD;MSH;MTH;NCI;SNOMEDCT|||  
BUN|BUN measurement|C0005845|||C0005845|SNOMEDCT|||  
BUN|Blood Urea|C0005845;C0600137|||C0600137|NCI|||  
BUN|Blood Urea Nitrogen|C0005845;C0600137|||C0005845;C0600137|MSH;MTH;NCI|||  
BUN|Blood Urea Nitrogen Measurement|C0005845|||C0005845|NCI|||  
BUN|Blood urea|C0005845;C0600137|||C0005845|SNOMEDCT|||  
BUN|Blood urea (procedure)|||C0005845|SNOMEDCT|||  
BUN|Blood urea measurement|C0005845|||C0005845|SNOMEDCT|||  
BUN|Blood urea measurement (procedure)|||C0005845|SNOMEDCT|||  
BUN|Blood urea nitrogen|C0005845;C0600137|||C0600137|SNOMEDCT|||  
BUN|Blood urea nitrogen (substance)|||C0600137|SNOMEDCT|||  
BUN|Blood urea nitrogen concentration|||1|0.0063|  
BUN|Blood urea nitrogen measurement|C0005845|||C0005845|MTH;SNOMEDCT|||  
BUN|Blood urea nitrogen measurement (procedure)|||C0005845|SNOMEDCT|||  
BUN|Nitrogen, Blood Urea|C0005845;C0600137|||C0005845|MSH|||  
BUN|Urea - blood|C0005845|||C0005845|SNOMEDCT|||  
BUN|Urea Nitrogen, Blood|C0005845;C0600137|||C0005845|MSH|||  
BUN|blood urea|C0005845;C0600137|||C0005845|CHV|||  
BUN|blood urea  
nitrogen|C0005845;C0600137|1|1.000|C0005845;C0600137|AOD;CHV;CSP;MSH;MTH;NCI;SNO  
MEDCT|1|0.9937|1  
BUN|blood urea nitrogen (BUN)|C0005845;C0600137|||C0600137|CHV|||  
BUN|blood urea nitrogen (BUN) level test|||C0005845|CHV|||  
BUN|bun measurement|C0005845|||C0005845|CHV|||  
BUN|bunion|C0006386|||1|  
BUN|urea blood|C0005845|||C0005845|CHV|||  
BUN|urea nitrogen|C0600137;C1291218|||C0600137|NCI|||  
BUS|1, 4-Bis(methanesulfonyl)butane|C0006463|||C0006463|NCI|||  
BUS|1,4-Bis(methanesulfonyl)butane|||C0006463|NCI;PDQ|||

BUS|1,4-Butanediol Dimethanesulfonate Esters|||C0006463|NCI;PDQ|||  
 BUS|1,4-Butanediol Dimethylsulfonate|||C0006463|NCI;PDQ|||  
 BUS|1,4-Butanediol, dimethanesulfonate|||C0006463|MSH;NDFRT|||  
 BUS|1,4-Di(methanesulfonyloxy)butane|||C0006463|NCI;PDQ|||  
 BUS|1,4-Di(methylsulfonyloxy)butane|||C0006463|NCI;PDQ|||  
 BUS|BSF|C0006463|||C0006463|PDQ|||  
 BUS|BU|C0006463|||C0006463|PDQ|||  
 BUS|BUS|C0336815;C1704736|||C0006463;C1704736|NCI;PDQ|||  
 BUS|BUSULFAN|C0006463|||C0006463|MTHSPL;NCI;NDFRT;VANDF|||  
 BUS|Bartholin, urethral, and Skene||1|1.000|||1  
 BUS|Bus|C0336815;C1704736|||C0336815;C1552509;C1704736|HL7V3.0;NCI;SNOMEDCT|||  
 BUS|Bus - Transportation Service|C1552509|||C1552509|MTH|||  
 BUS|Bus Device Component|C1704736|||C1704736|MTH;NCI|||  
 BUS|Buses|C0336815|||C0336815|MSH|||  
 BUS|Bussulfam|C0006463|||C0006463|NCI;PDQ|||  
 BUS|Busulfan|C0006463|||C0006463|LNC;MSH;MTH;MTHSPL;NCI;NDFRT;RXNORM;SNOMEDCT;US  
 PMG|||  
 BUS|Busulfan (product)|||C0006463|SNOMEDCT|||  
 BUS|Busulfan (substance)|||C0006463|SNOMEDCT|||  
 BUS|Busulfan [Chemical/Ingredient)|||C0006463|NDFRT|||  
 BUS|Busulfanum|C0006463|||C0006463|NCI;PDQ|||  
 BUS|Busulphan|C0006463|||C0006463|MSH;NCI;NDFRT;SNOMEDCT|||  
 BUS|Methanesulfonic Acid Tetramethylene Ester|C0006463|||C0006463|NCI;PDQ|||  
 BUS|Methanesulfonic acid, tetramethylene ester|C0006463|||C0006463|NCI|||  
 BUS|Motor bus|C0336815|||C0336815|MTH;SNOMEDCT|||  
 BUS|Motor bus, device|C0336815|||C0336815|SNOMEDCT|||  
 BUS|Motor bus, device (physical object)|||C0336815|SNOMEDCT|||  
 BUS|Myeleukon|C0006463|||C0006463|NCI;PDQ|||  
 BUS|Sulfabutin|C0006463|||C0006463|NCI;PDQ|||  
 BUS|Tetramethylene Bis(methanesulfonate)|C0006463|||C0006463|NCI;PDQ|||  
 BUS|Tetramethylene bis[methanesulfonate]|C0006463|||C0006463|NCI|||  
 BUS|bladder ultrasound|C0855956|||1  
 BUS|bsf|C0006463|||C0006463|CHV|||  
 BUS|bulbourethral sling|||1  
 BUS|bus|C0336815;C1704736|||C0336815|CHV|||  
 BUS|buses|C0336815|||C0336815|CHV|||  
 BUS|buspirone|C0006462|||1|1|  
 BUS|busulfan|C0006463|||C0006463|CHV;CSP;LNC;MSH;MTH;MTHSPL;NCI;NDFRT;PDQ;RXNORM  
 ;SNOMEDCT;USPMG;VANDF|||  
 BUS|busulphan|C0006463|||C0006463|CHV;PDQ|||  
 C&S|conjunctiva and sclera|||1  
 C&S|conjunctivae and sclerae||1|0.868|||1  
 C&S|cough and sneeze|||1  
 C&S|culture and sensitivity||1|0.094|||1  
 C&S|culture and susceptibility|C0430388|||1  
 C&S|protein C and protein S||1|0.032|||1  
 C3|(complement) component 3|C0009506;C1332656|1|0.486|||1  
 C3|(stage) C3|C0441788|1|0.004|||1  
 C3|C3|C2699419|||C0009506;C0456881;C1305853;C1332656;C2699419|FMA;HUGO;NCI;OMIM;  
 SNOMEDCT;UWDA|||  
 C3|C3 - Complement component 3|C0009506|||C0009506|SNOMEDCT|||  
 C3|C3 - TNM certainty factor|C0456881|||C0456881|SNOMEDCT|||  
 C3|C3 - TNM certainty factor (tumor staging)|||C0456881|SNOMEDCT|||  
 C3|C3 Complement|C0009506|||C0009506|MSH;NDFRT|||  
 C3|C3 Gene|C1332656|||C1332656|NCI|||  
 C3|C3 and PZP-Like Alpha-2-Macroglobulin Domain-Containing Protein  
 1|||C0009506|NCI|||

C3|C3 certainty|C0456881|||C0456881|SNOMEDCT|||  
C3|C3 certainty (qualifier value)|||C0456881|SNOMEDCT|||  
C3|C3 certainty (tumor staging)|||C0456881|SNOMEDCT|||  
C3|C3 gene|C1332656|||C1332656|HUGO;MTH|||  
C3|C3 innervation|C1305853|||C1305853|MTH|||  
C3|C3(H2O)|||C0009506|SNOMEDCT|||  
C3|C3(H2O) (substance)|||C0009506|SNOMEDCT|||  
C3|C3, Complement|C0009506;C2699419|||C0009506|MSH|||  
C3|C3H/HeJ|||1|0.0429|  
C3|C3c|C1332656|||C1332656|OMIM|||  
C3|C3d|C1332656;C2826008;C3151071|||C1332656|OMIM|||  
C3|COMPLEMENT C 03|||C0009506|MSH|||  
C3|COMPLEMENT COMPONENT 3|C0009506;C1332656|||C1332656|OMIM|||  
C3|CPAMD1|C1332656|||C1332656|HUGO|||  
C3|Clostridium botulinum C3 exoenzyme|||1|0.0102|  
C3|Collins solution|C0056123|||1|  
C3|Complement -third component-C3|||C0009506|SNOMEDCT|||  
C3|Complement 3|C0009506|||C0009506|MSH;MTH;NDFRT|||  
C3|Complement C3|C0009506;C2699419|||C0009506;C2699419|LNC;MSH;NCI;NDFRT|||  
C3|Complement C3 Measurement|C2699419|||C2699419|MTH;NCI|||  
C3|Complement C3 [Chemical/Ingredient]|||C0009506|NDFRT|||  
C3|Complement Component 3|C0009506;C1332656|||C0009506|MSH;NCI;NDFRT|||  
C3|Complement Component 3 Gene|C1332656|||C1332656|NCI|||  
C3|Complement component 3|C0009506;C1332656|||C0009506|SNOMEDCT|||  
C3|Complement component 3 (procedure)|||C0009506|SNOMEDCT|||  
C3|Complement component C3|C0009506|||C0009506|SNOMEDCT|||  
C3|Complement component C3 (substance)|||C0009506|SNOMEDCT|||  
C3|Complement component C3, NOS|C0009506|||C0009506|SNOMEDCT|||  
C3|Complement, C3|C0009506|||C0009506|MSH|||  
C3|Component 3, Complement|C0009506;C1332656|||C0009506|MSH|||  
C3|Flaveria pringlei|C0996999|||1|0.0143|  
C3|TNM certainty factor C3|C0456881|||C0456881|MTH|||  
C3|c3 complement|C0009506|||C0009506|CHV|||  
C3|c3 complement component|C0009506|||C0009506|CHV|||  
C3|cervical (level) 3||1|0.498|||  
C3|complement 3|C0009506|||C0009506|CHV;MSH;MTH;NDFRT|1|0.0571|  
C3|complement C3|C0009506;C2699419|||1|0.0143|  
C3|complement c3|C0009506;C2699419|||C0009506|CHV|||  
C3|complement component  
3|C0009506;C1332656|||C0009506;C1332656|HUGO;MSH;NCI;NDFRT;OMIM;SNOMEDCT|1|0.104  
1|  
C3|complement component c3|C0009506|||C0009506|CHV|||  
C3|complement factor 3|||1|0.0531|  
C3|propionylcarnitine|C0072196|1|0.012|||  
C3|third|C0205437|||1|0.0571|  
C3|third carpal bone|C0223733|||1|0.0245|  
C3|third cervical (c3) nerve|||C1305853|CHV|||  
C3|third cervical vertebra|C0459939|||C0459939|FMA;SNOMEDCT;UWDA|||  
C3|third complement component|||1|0.0837|  
C3|third component|||1|0.0469|  
C3|third component of complement|||1|0.4918|  
C4|(PO Box) C4||1|0.002|||  
C4|(complement) component 4|C0009516|1|0.462|||  
C4|ACIDIC C4|C1412999|||C1412999|OMIM|||  
C4|C4|C0577608|||C0009516;C0456882;C0577608;C1305858;C1412999|FMA;HUGO;NCI;SNOME  
DCT;UWDA|||  
C4|C4 - Complement component 4|C0009516|||C0009516|SNOMEDCT|||

C4|C4 - TNM certainty factor|C0456882|||C0456882|SNOMEDCT|||  
C4|C4 - TNM certainty factor (tumor staging)|||C0456882|SNOMEDCT|||  
C4|C4 Complement|C0009516|||C0009516|MSH;NDFRT|||  
C4|C4 Complement Component|C0009516|||C0009516|MSH;NDFRT|||  
C4|C4 certainty|C0456882|||C0456882|SNOMEDCT|||  
C4|C4 certainty (qualifier value)|||C0456882|SNOMEDCT|||  
C4|C4 certainty (tumor staging)|||C0456882|SNOMEDCT|||  
C4|C4 complement assay|C0577608|||C0577608|SNOMEDCT|||  
C4|C4 complement assay (procedure)|C0577608|||C0577608|MTH;SNOMEDCT|||  
C4|C4 innervation|C1305858|||C1305858|MTH|||  
C4|C4, Complement|C0009516;C0577608|||C0009516|MSH|||  
C4|C4A|C0523345;C1412999|||C1412999|HUGO;OMIM|||  
C4|C4A gene|C1412999|||C1412999|HUGO;MTH|||  
C4|C4A2|C1412999|||C1412999|HUGO|||  
C4|C4A3|C1412999|||C1412999|HUGO|||  
C4|C4A4|C1412999|||C1412999|HUGO|||  
C4|C4A6|C1412999|||C1412999|HUGO|||  
C4|C4B|||C1412999|HUGO|||  
C4|C4S|C1412999|||C1412999|HUGO;OMIM|||  
C4|C<sub>4</sub> complement assay|||C0577608|SNOMEDCT|||  
C4|C<sub>4</sub> complement assay (procedure)|||C0577608|SNOMEDCT|||  
C4|C>4< complement assay|||C0577608|SNOMEDCT|||  
C4|C>4< complement assay (procedure)|||C0577608|SNOMEDCT|||  
C4|CO4|C1412999;C1413000|||C1412999|HUGO|||  
C4|COMPLEMENT C 04|||C0009516|MSH|||  
C4|COMPLEMENT COMPONENT 4A|C0009517;C1412999|||C1412999|OMIM|||  
C4|COMPLEMENT COMPONENT 4S|C1412999|||C1412999|OMIM|||  
C4|CPAMD2|C1412999|||C1412999|HUGO|||  
C4|Complement 4|C0009516|||C0009516|MSH;NDFRT|||  
C4|Complement C4|C0009516;C0577608|||C0009516;C0577608|LNC;MSH;NCI;NDFRT|||  
C4|Complement C4 Measurement|C0577608|||C0577608|NCI|||  
C4|Complement C4 [Chemical/Ingredient]|||C0009516|NDFRT|||  
C4|Complement C4 measurement|C0577608|||C0577608|SNOMEDCT|||  
C4|Complement Component 4|C0009516|||C0009516|MSH;NDFRT|||  
C4|Complement Component, C4|C0009516|||C0009516|MSH|||  
C4|Complement Component-4|C0009516|||C0009516|NCI|||  
C4|Complement component 4|C0009516|||C0009516|SNOMEDCT|||  
C4|Complement component 4 (procedure)|||C0009516|SNOMEDCT|||  
C4|Complement component 4 (substance)|||C0009516|SNOMEDCT|||  
C4|Complement component 4 test|C0577608|||C0577608|SNOMEDCT|||  
C4|Complement component C4|C0009516|||C0009516|MTH;SNOMEDCT|||  
C4|Complement component C4 (substance)|||C0009516|SNOMEDCT|||  
C4|Complement component C4 (substance) [Ambiguous]|||C0009516|SNOMEDCT|||  
C4|Complement component C4, NOS|C0009516|||C0009516|SNOMEDCT|||  
C4|Complement, C4|C0009516|||C0009516|MSH|||  
C4|Complement-fourth component-C4|||C0009516|SNOMEDCT|||  
C4|Component 4, Complement|C0009516|||C0009516|MSH|||  
C4|Component, C4 Complement|C0009516|||C0009516|MSH|||  
C4|F trinervia|||1|0.0068|  
C4|Flaveria trinervia|C0997000|||1|0.0743|  
C4|RG|C1412999|||C1412999|HUGO|||  
C4|RODGERS BLOOD GROUP|||C1412999|OMIM|||  
C4|RODGERS FORM OF C4|||C1412999|OMIM|||  
C4|TNM certainty factor C4|C0456882|||C0456882|MTH|||  
C4|cervical (level) 4|||1|0.522|||  
C4|complement 4|C0009516|||C0009516|CHV;MSH;NDFRT|1|0.0676|  
C4|complement c4|C0009516;C0577608|||C0009516|CHV|||

C4|complement component 4|C0009516|||C0009516|CHV;MSH;NDFRT;SNOMEDCT|1|0.0473|  
C4|complement component 4A (Rodgers blood group)|||C1412999|HUGO|||  
C4|complement component c4|C0009516|||C0009516|CHV|||  
C4|fourth cervical (c4) nerve|||C1305858|CHV|||  
C4|fourth cervical vertebra|C0459941|||C0459941|FMA;SNOMEDCT;UWDA|||  
C4|fourth complement component|||1|0.1216|  
C4|fourth component of complement|||1|0.6824|  
C5|(complement) component 5|C0009519;C1367710|1|0.008|||  
C5|C3 and PZP-Like Alpha-2-Macroglobulin Domain-Containing Protein  
4|||C0009519|NCI|||  
C5|C5|||C0009519;C0456883;C1305859;C1367710|FMA;HUGO;NCI;OMIM;SNOMEDCT;UWDA|||  
C5|C5 - Complement component 5|C0009519|||C0009519|SNOMEDCT|||  
C5|C5 - TNM certainty factor|C0456883|||C0456883|SNOMEDCT|||  
C5|C5 - TNM certainty factor (tumor staging)|||C0456883|SNOMEDCT|||  
C5|C5 Complement|C0009519|||C0009519|MSH;NDFRT|||  
C5|C5 Gene|C1367710|||C1367710|NCI|||  
C5|C5 certainty|C0456883|||C0456883|SNOMEDCT|||  
C5|C5 certainty (qualifier value)|||C0456883|SNOMEDCT|||  
C5|C5 certainty (tumor staging)|||C0456883|SNOMEDCT|||  
C5|C5 gene|C1367710|||C1367710|HUGO;MTH|||  
C5|C5 innervation|C1305859|||C1305859|MTH|||  
C5|C5(-OH acylcarnitine)||1|0.010|||  
C5|C5, Complement|C0009519|||C0009519|MSH|||  
C5|COMPLEMENT C 05|||C0009519|MSH|||  
C5|COMPLEMENT COMPONENT 5|C0009519;C1367710|||C1367710|OMIM|||  
C5|CPAMD4|C1367710|||C1367710|HUGO|||  
C5|Complement 5|C0009519|||C0009519|MSH;NDFRT|||  
C5|Complement C5|C0009519|||C0009519|LNC;MSH;NCI;NDFRT|||  
C5|Complement C5 [Chemical/Ingredient]|||C0009519|NDFRT|||  
C5|Complement Component 5|C0009519;C1367710|||C0009519|MSH;NCI;NDFRT|||  
C5|Complement Component 5 Gene|C1367710|||C1367710|NCI|||  
C5|Complement component 5|C0009519;C1367710|||C0009519|SNOMEDCT|||  
C5|Complement component C5|C0009519|||C0009519|MTH;SNOMEDCT|||  
C5|Complement component C5 (substance)|||C0009519|SNOMEDCT|||  
C5|Complement component C5, NOS|C0009519|||C0009519|SNOMEDCT|||  
C5|Complement, C5|C0009519|||C0009519|MSH|||  
C5|Component 5, Complement|C0009519;C1367710|||C0009519|MSH|||  
C5|TNM certainty factor C5|C0456883|||C0456883|MTH|||  
C5|c5 complement|C0009519|||C0009519|CHV|||  
C5|cervical (level) 5||1|0.982|||  
C5|complement 5|C0009519|||C0009519|CHV;MSH;NDFRT|||  
C5|complement c5|C0009519|||C0009519|CHV|||  
C5|complement component  
5|C0009519;C1367710|||C0009519;C1367710|HUGO;MSH;NCI;NDFRT;OMIM;SNOMEDCT|1|0.051  
3|  
C5|complement component c5|C0009519|||C0009519|CHV|||  
C5|fifth cervical (c5) nerve|||C1305859|CHV|||  
C5|fifth cervical vertebra|C0459943|||C0459943|FMA;SNOMEDCT;UWDA|||  
C5|fifth complement component|||1|0.0769|  
C5|fifth component|||1|0.1026|  
C5|fifth component of complement|||1|0.6923|  
C5|five or more coughs|||1|0.0769|  
C6|C6|||C1305860;C1413014;C1419009|FMA;HUGO;OMIM;UWDA|||  
C6|C6 (acylcarnitine)||1|0.004|||  
C6|C6 gene|C1413014|||C1413014|HUGO;MTH|||  
C6|C6 innervation|C1305860|||C1305860|MTH|||  
C6|COMPLEMENT COMPONENT 6|C0009523;C1413014|||C1413014|OMIM|||

C6|HSPC|C1419009|||C1419009|HUGO|||  
C6|PROTEASOME SUBUNIT ALPHA-4|C1419009|||C1419009|OMIM|||  
C6|PROTEASOME SUBUNIT, ALPHA-TYPE, 7|C1419009|||C1419009|OMIM|||  
C6|PSMA7|C1419009|||C1419009|HUGO;OMIM|||  
C6|PSMA7 gene|C1419009|||C1419009|HUGO;MTH|||  
C6|RC6-1|C1419009|||C1419009|HUGO|||  
C6|XAPC7|C1419009|||C1419009|HUGO;OMIM|||  
C6|cervical (level) 6||1|0.992|||  
C6|complement 6|C0009523|||C0009523|MSH;NDFRT|||  
C6|complement component  
6|C0009523;C1413014|||C0009523;C1413014|HUGO;MSH;NDFRT;OMIM;SNOMEDCT|||  
C6|hexamethonium|C0062637|||1|0.339|1  
C6|proteasome (prosome, macropain) subunit, alpha type, 7|||C1419009|HUGO|||  
C6|proteasome subunit RC6-1|C1419009|||C1419009|HUGO|||  
C6|proteasome subunit XAPC7|C1419009|||C1419009|HUGO|||  
C6|rat glioma|||1|0.2458|  
C6|sixth|C0205440|||1|0.0847|  
C6|sixth cervical|||1|0.0424|  
C6|sixth cervical (c6) nerve|||C1305860|CHV|||  
C6|sixth cervical vertebra|C0459944|||C0459944|FMA;SNOMEDCT;UWDA|||  
C6|sixth complement component|||1|0.0424|  
C6|sixth component|||1|0.0424|  
C6|sixth component of complement|||1|0.2034|  
C7|C7|||C1305861;C1367714;C1413019;C1706327|FMA;HUGO;NCI;OMIM;UWDA|||  
C7|C7 gene|C1413019|||C1413019|HUGO;MTH|||  
C7|C7 innervation|C1305861|||C1305861|MTH|||  
C7|CHEMOKINE, CXC MOTIF, LIGAND 10|C1367714|||C1367714|OMIM|||  
C7|COMPLEMENT COMPONENT 7|C0009524;C1413019|||C1413019|OMIM|||  
C7|CRG-2|C1367714;C1706327|||C1706327|NCI|||  
C7|CXCL10|||C1367714|HUGO;NCI;OMIM|||  
C7|CXCL10 Gene|C1367714|||C1367714|NCI|||  
C7|CXCL10 gene|C1367714|||C1367714|HUGO;MTH|||  
C7|CXCL10 wt Allele|C1706327|||C1706327|MTH;NCI|||  
C7|Chemokine (C-X-C Motif) Ligand 10 Gene|||C1367714|NCI|||  
C7|Chemokine (C-X-C Motif) Ligand 10 wt Allele|||C1706327|NCI|||  
C7|IFI10|C1367714;C1706327|||C1367714;C1706327|HUGO;NCI|||  
C7|INP10|C1367714;C1706327|||C1367714;C1706327|NCI;OMIM|||  
C7|INTERFERON-GAMMA-INDUCED FACTOR|||C1367714|OMIM|||  
C7|INTERFERON-GAMMA-INDUCIBLE PROTEIN 10|C1367714;C1522712|||C1367714|OMIM|||  
C7|IP-10|C1522712|||C1367714;C1706327|HUGO;NCI|||  
C7|IP10|||C1367714|OMIM|||  
C7|MOB-1|C1367714;C1706327|||C1706327|NCI|||  
C7|MOB1, MOUSE, HOMOLOG OF|||C1367714|OMIM|||  
C7|SCYB10|C1367714;C1706327|||C1367714;C1706327|NCI;OMIM|||  
C7|SMALL INDUCIBLE CYTOKINE SUBFAMILY B, MEMBER 10|C1367714|||C1367714|OMIM|||  
C7|cervical (level) 7||1|1.000|||  
C7|chemokine (C-X-C motif) ligand 10|||C1367714|HUGO|||  
C7|complement 7|C0009524|||C0009524|MSH;NDFRT|||  
C7|complement component  
7|C0009524;C1413019|||C0009524;C1413019|HUGO;MSH;NDFRT;OMIM;SNOMEDCT|||  
C7|crg-2|C1367714;C1706327|||C1367714|HUGO|||  
C7|gIP-10|C1367714;C1706327|||C1367714;C1706327|HUGO;NCI|||  
C7|mob-1|C1367714;C1706327|||C1367714|HUGO|||  
C7|seventh cervical|||1|0.2941|  
C7|seventh cervical (c7) nerve|||C1305861|CHV|||  
C7|seventh cervical vertebra|C0223176|||C0223176|FMA;MTH;SNOMEDCT;UWDA|||  
C7|seventh component of complement|||1|0.7059|

CABG|ACB graft|||C0010055|SNOMEDCT|||  
CABG|Aortocoronary Bypass|C0010055|||C0010055|MSH|||  
CABG|Aortocoronary Bypasses|C0010055|||C0010055|MSH|||  
CABG|Aortocoronary artery bypass graft|C0010055|||C0010055|SNOMEDCT|||  
CABG|Aortocoronary artery bypass graft (procedure)|||C0010055|SNOMEDCT|||  
CABG|Aortocoronary bypass NOS|C0010055|||C0010055|ICD9CM|||  
CABG|Aortocoronary bypass for heart  
revascularisation|C0010055|||C0010055|SNOMEDCT|||  
CABG|Aortocoronary bypass for heart  
revascularization|C0010055|||C0010055|SNOMEDCT|||  
CABG|Aortocoronary bypass for heart revascularization,  
NOS|C0010055|||C0010055|SNOMEDCT|||  
CABG|Aortocoronary bypass for heart revascularization, not otherwise  
specified|C0010055|||C0010055|ICD9CM|||  
CABG|Artery Bypass, Coronary|C0010055|||C0010055|MSH|||  
CABG|Artery Bypasses, Coronary|C0010055|||C0010055|MSH|||  
CABG|BYPASS SURG CORONARY ARTERY|||C0010055|MSH|||  
CABG|Bypass Surgery, Coronary Artery|C0010055|||C0010055|MSH|||  
CABG|Bypass anastomosis for heart  
revascularization|C0010055|||C0010055|ICD9CM|||  
CABG|Bypass, Aortocoronary|C0010055|||C0010055|MSH|||  
CABG|Bypass, Coronary Artery|C0010055|||C0010055|MSH|||  
CABG|Bypasses, Aortocoronary|C0010055|||C0010055|MSH|||  
CABG|Bypasses, Coronary Artery|C0010055|||C0010055|MSH|||  
CABG|CAB|C0010055;C1417778;C2986493|||C0010055|NCI|||  
CABG|CAB graft|||C0010055|SNOMEDCT|||  
CABG|CABG|C0010055|||C0010055|CHV;MEDLINEPLUS;MSH;NCI|||  
CABG|CABG - Coronary artery bypass graft|C0010055|||C0010055|SNOMEDCT|||  
CABG|CAG - Coronary artery graft|C0010055|||C0010055|SNOMEDCT|||  
CABG|CBG - Coronary bypass graft|C0010055|||C0010055|SNOMEDCT|||  
CABG|CORONARY ARTERY BYPASS|C0010055|||C0010055|COSTAR|||  
CABG|CORONARY ARTERY BYPASS SURG|||C0010055|MSH|||  
CABG|CORONARY BYPASS|C0010055|||C0010055|COSTAR|||  
CABG|Cardiac revascularisation with aortocoronary bypass  
anastomosis|C0010055|||C0010055|SNOMEDCT|||  
CABG|Cardiac revascularisation with bypass  
anastomosis|C0010055|||C0010055|SNOMEDCT|||  
CABG|Cardiac revascularization with aortocoronary bypass  
anastomosis|C0010055|||C0010055|SNOMEDCT|||  
CABG|Cardiac revascularization with bypass  
anastomosis|C0010055|||C0010055|SNOMEDCT|||  
CABG|Cardiac revascularization with bypass anastomosis  
(procedure)|||C0010055|SNOMEDCT|||  
CABG|Cardiac revascularization with bypass anastomosis,  
NOS|C0010055|||C0010055|SNOMEDCT|||  
CABG|Coronary A. operations|||C0010055|SNOMEDCT|||  
CABG|Coronary Artery Bypass|C0010055|||C0010055|MSH|||  
CABG|Coronary Artery Bypass  
Graft|C0010055;C1260596|||C0010055|MEDLINEPLUS;NCI|||  
CABG|Coronary Artery Bypass Grafting|C0010055|||C0010055|MSH;NCI|||  
CABG|Coronary Artery Bypass  
Surgery|C0010055|||C0010055|MEDLINEPLUS;MSH;MTH;NCI|||  
CABG|Coronary Artery Bypasses|C0010055|||C0010055|MSH|||  
CABG|Coronary artery bypass  
graft|C0010055;C1260596|||C0010055|MEDLINEPLUS;SNOMEDCT|||  
CABG|Coronary artery bypass graft (CABG)|C0010055;C1260596|||C0010055|CCS|||  
CABG|Coronary artery bypass graft (procedure)|||C0010055|SNOMEDCT|||

CABG|Coronary artery bypass graft (procedure)  
[Ambiguous]|||C0010055|SNOMEDCT|||  
CABG|Coronary artery bypass graft operations|C0010055||C0010055|SNOMEDCT|||  
CABG|Coronary artery bypass grafting|C0010055||C0010055|SNOMEDCT|||  
CABG|Coronary artery bypass grafting (procedure)|||C0010055|SNOMEDCT|||  
CABG|Coronary artery operations|C0190188||C0010055|SNOMEDCT|||  
CABG|Coronary artery operations (& bypass)|||C0010055|SNOMEDCT|||  
CABG|Coronary artery operations (& bypass) (procedure)|||C0010055|SNOMEDCT|||  
CABG|Coronary bypass|C0010055||C0010055|SNOMEDCT|||  
CABG|Heart Bypass|C0007202;C0010055||C0010055|NCI|||  
CABG|Vascular aortocoronary bypass|C0010055||C0010055|SNOMEDCT|||  
CABG|aortocoronary bypass|C0010055||C0010055|AOD;NCI|||  
CABG|bypass graft operation||||1|0.0017|  
CABG|coronary artery bypass|C0010055||C0010055|CHV;NCI|1|0.0102|  
CABG|coronary artery bypass  
graft|C0010055;C1260596|1|1.000|C0010055;C1260596|CHV;MEDLINEPLUS;NCI;SNOMEDCT|1  
|0.2355|1  
CABG|coronary artery bypass graft (GABG)|||C0010055|CHV|||  
CABG|coronary artery bypass graft surgery||||1|0.0724|  
CABG|coronary artery bypass  
grafting|C0010055||C0010055|MSH;NCI;SNOMEDCT|1|0.6187|1  
CABG|coronary artery bypass surgery|C0010055||C0010055|CHV|1|0.046|  
CABG|coronary bypass|C0010055||C0010055|CHV;CSP|1|0.0034|  
CABG|coronary bypass surgery|C0010055||C0010055|CHV|1|0.0097|  
CABG|coronary revascularization|C0877341||||1|0.0024|  
CAD|AD|||C0280573|PDQ|||  
CAD|ARA-C/DNR|||C0280573|NCI;PDQ|||  
CAD|ARTERIOSCLEROSIS CORONARY ARTERY|C0010054||C0010054|CST|||  
CAD|ARTERIOSCLEROTIC HEART DISEASE|C0010054||C0010054|COSTAR;QMR|||  
CAD|ASHD|C0010054||C0010054|DXP;MTHICD9;SNOMEDCT|||  
CAD|ASHD - Atherosclerotic heart disease|||C0010054|SNOMEDCT|||  
CAD|ATHEROSCLEROTIC CORONARY VASCULAR DISEASE|C0010054||C0010054|COSTAR|||  
CAD|ATHEROSCLEROTIC HEART DISEASE|C0010054||C0010054|DXP|||  
CAD|Arterioscleroses, Coronary|C0010054||C0010054|MSH|||  
CAD|Arteriosclerosis, Coronary|C0010054||C0010054|MEDLINEPLUS;MSH|||  
CAD|Arteriosclerotic heart disease|C0010054||C0010054|LNC;MTHICD9;SNOMEDCT|||  
CAD|Artery Disease, Coronary|C0010054;C0010068;C1956346||C1956346|MSH|||  
CAD|Artery Diseases, Coronary|C0010054;C1956346||C1956346|MSH|||  
CAD|Atheroscleroses, Coronary|C0010054||C0010054|MSH|||  
CAD|Atherosclerosis, Coronary|C0010054;C2733225||C0010054|MEDLINEPLUS;MSH|||  
CAD|Atherosclerotic heart disease|C0010054||C0010054|MTHICD9;SNOMEDCT|||  
CAD|B4GALNT2|C1428349||C1428349|HUGO;OMIM|||  
CAD|B4GALNT2 gene|C1428349||C1428349|HUGO;MTH|||  
CAD|BETA-1, 4-N-ACETYL-GALACTOSAMINYLTRANSFERASE 2|||C1428349|OMIM|||  
CAD|BLOOD GROUP--Cad SYSTEM|C1862195||C1862195|MTH;OMIM|||  
CAD|CAD|||C0010054;C0010068;C0011905;C0170509;C0280573;C1413078;C1413983;C18621  
95;C1956346|DXP;HUGO;MEDLINEPLUS;NCI;OMIM;PDQ|||  
CAD|CAD (coronary artery disease)|C1956346||C1956346|CSP|||  
CAD|CAD - Coronary artery disease|C1956346||C1956346|SNOMEDCT|||  
CAD|CAD Gene|C1413078||C1413078|NCI|||  
CAD|CAD TRIFUNCTIONAL PROTEIN|C1413078||C1413078|OMIM|||  
CAD|CAD gene|C1413078||C1413078|HUGO;MTH|||  
CAD|CARBAMOYL PHOSPHATE SYNTHETASE/ASPARTATE  
TRANSCARBAMOYLASE/DIHYDROOROTASE|||C1413078|OMIM|||  
CAD|CASPAASE-ACTIVATED DNase|C0669174;C1413983||C1413983|OMIM|||  
CAD|CHD (coronary heart disease)|C0010068||C0010068|CSP|||  
CAD|CHD - Coronary heart disease|C0010068||C0010068|SNOMEDCT|||

CAD|CIA||||C0170509|NCI;PDQ|||  
CAD|COMPUTER ASSISTED DIAG||||C0011905|MSH|||  
CAD|CORONARY ARTERIOSCLEROSIS|C0010054|||C0010054|MTH|||  
CAD|CORONARY ARTERY DIS||||C1956346|MSH|||  
CAD|CORONARY ARTERY DISEASE|C0010054;C0010068;C1956346|||C1956346|DXP|||  
CAD|CORONARY ARTERY DISORDER|C1956346|||C1956346|CST|||  
CAD|CORONARY ARTERY DISORDER (NOS)|C1956346|||C1956346|CST|||  
CAD|CORONARY ATHEROSCLEROSIS|C0010054;C2733225|||C0010054|DXP|||  
CAD|CORONARY DIS||||C0010068|MSH|||  
CAD|CORONARY DISEASE|C0010068|||C0010068|CST;DXP|||  
CAD|CORONARY HEART DIS||||C0010068|MSH|||  
CAD|CORONARY SCLEROSIS|C0010054|||C0010054|CST|||  
CAD|CPAN|C1413983|||C1413983|HUGO|||  
CAD|CPSase/ATCase/DHOase|||C1413078|OMIM|||  
CAD|CTX/DOX/DTIC||||C0170509|NCI;PDQ|||  
CAD|Cad||||C1428349|HUGO|||  
CAD|Carbamoyl-Phosphate Synthetase 2, Aspartate Transcarbamylase, and Dihydroorotase Gene||||C1413078|NCI|||  
CAD|Caspase-activated DNase|C0669174;C1413983|||||1|0.0065|  
CAD|Cervical artery dissection|||||1|0.0034|  
CAD|Cinnamyl alcohol dehydrogenase|C0055763|||||1|0.0031|  
CAD|Computer Assisted Diagnosis|C0011905|||C0011905|MSH;MTH|||  
CAD|Computer-Aided Diagnosis|C0011905|||C0011905|NCI|||  
CAD|Computer-Assisted Diagnoses|C0011905|||C0011905|MSH|||  
CAD|Computer-Assisted Diagnosis|C0011905|||C0011905|MSH|||  
CAD|Coronary Arterioscleroses|C0010054|||C0010054|MSH|||  
CAD|Coronary Arteriosclerosis|C0010054|||C0010054|MEDLINEPLUS;MSH;MTH|||  
CAD|Coronary Artery Disease|C0010054;C0010068;C1956346|||C0010068;C1956346|COSTAR;MEDLINEPLUS;MSH;MTH;NCI;NDFRT|||  
CAD|Coronary Artery Disease [Disease/Finding]||||C1956346|NDFRT|||  
CAD|Coronary Artery Diseases|C0010054;C1956346|||C1956346|MSH|||  
CAD|Coronary Atheroscleroses|C0010054|||C0010054|MSH|||  
CAD|Coronary Atherosclerosis|C0010054;C2733225|||C0010054|MSH;NCI|||  
CAD|Coronary Disease|C0010068|||C0010068|MSH;NCI;NDFRT|||  
CAD|Coronary Disease [Disease/Finding]||||C0010068|NDFRT|||  
CAD|Coronary Diseases|C0010068|||C0010068|MSH|||  
CAD|Coronary Heart Disease|C0010054;C0010068|||C0010068|MSH;NDFRT|||  
CAD|Coronary Heart Diseases|C0010068|||C0010068|MSH|||  
CAD|Coronary arteriosclerosis|C0010054|||C0010054|MEDLINEPLUS;MTHICD9;SNOMEDCT|||  
CAD|Coronary arteriosclerosis (disorder)||||C0010054|SNOMEDCT|||  
CAD|Coronary artery arteriosclerosis|C0010054|||C0010054|MTHICD9|||  
CAD|Coronary artery disease|C0010054;C0010068;C1956346|||C1956346|LNC;OMIM;SNOMEDCT|||  
CAD|Coronary artery disease (disorder)||||C1956346|SNOMEDCT|||  
CAD|Coronary artery disease, NOS|C0010054;C0010068;C1956346|||C1956346|SNOMEDCT|||  
CAD|Coronary artery sclerosis|C0010054|||C0010054|MTHICD9|||  
CAD|Coronary atherosclerosis|C0010054;C2733225|||C0010054|CCS;ICD9CM;OMIM;SNOMEDCT|||  
CAD|Coronary atherosclerosis (disorder)||||C0010054|SNOMEDCT|||  
CAD|Coronary heart disease|C0010054;C0010068|||C0010068|LCH;MTH;SNOMEDCT|||  
CAD|Coronary sclerosis|C0010054|||C0010054|MTHICD9;SNOMEDCT|||  
CAD|CyADIC chemotherapy protocol|C0170509|||C0170509|CHV|||  
CAD|CyADIC protocol|C0170509|||C0170509|MSH|||  
CAD|CyADIC regimen|C0170509|||C0170509|MSH|||

CAD|Cyclophosphamide/Dacarbazine/Doxorubicin||||C0170509|NCI|||  
CAD|Cytarabine/Daunorubicin||||C0280573|NCI|||  
CAD|DA|C1602374|||C0280573|NCI;PDQ|||  
CAD|DEOXYRIBONUCLEASE III, CASPASE-ACTIVATED|C1413983|||C1413983|OMIM|||  
CAD|DFF-40|C1413983|||C1413983|HUGO|||  
CAD|DFF2|C1413983|||C1413983|OMIM|||  
CAD|DFF40|C1413983|||C1413983|HUGO;OMIM|||  
CAD|DFFB|C1413983|||C1413983|HUGO;OMIM|||  
CAD|DFFB gene|C1413983|||C1413983|HUGO;MTH|||  
CAD|DIAG COMPUTER ASSISTED||||C0011905|MSH|||  
CAD|DISEASE CORONARY ARTERY|C1956346|||C1956346|CST|||  
CAD|DISORDER CORONARY ARTERY|C1956346|||C1956346|CST|||  
CAD|DNA FRAGMENTATION FACTOR, 40-KD, BETA SUBUNIT|C1413983|||C1413983|OMIM|||  
CAD|DNA fragmentation factor, 40kDa, beta polypeptide (caspase-activated DNase)||||C1413983|HUGO|||  
CAD|Diagnoses, Computer-Assisted|C0011905|||C0011905|MSH|||  
CAD|Diagnosis, Computer Assisted|C0011905|||C0011905|MSH|||  
CAD|Diagnosis, Computer-Assisted|C0011905|||C0011905|MSH|||  
CAD|Disease of the coronary arteries|C1956346|||C1956346|SNOMEDCT|||  
CAD|Disease, Coronary|C0010068|||C0010068|MSH|||  
CAD|Disease, Coronary Artery|C0010054;C0010068;C1956346|||C1956346|MSH|||  
CAD|Disease, Coronary Heart|C0010054;C0010068|||C0010068|MSH|||  
CAD|Diseases, Coronary|C0010068|||C0010068|MSH|||  
CAD|Diseases, Coronary Artery|C0010054;C1956346|||C1956346|MSH|||  
CAD|Diseases, Coronary Heart|C0010068|||C0010068|MSH|||  
CAD|Disorder of coronary artery|C1956346|||C1956346|SNOMEDCT|||  
CAD|Disorder of coronary artery (disorder)||||C1956346|SNOMEDCT|||  
CAD|GALGT2|C1428349|||C1428349|OMIM|||  
CAD|HEART: CORONARY ARTERY||||C1956346|CST|||  
CAD|Heart Disease, Coronary|C0010054;C0010068|||C0010068|MSH|||  
CAD|Heart Diseases, Coronary|C0010068|||C0010068|MSH|||  
CAD|Sda|C0276477;C1428349;C1553165|||C1428349|HUGO|||  
CAD|arteriosclerotic heart disease|C0010054|||C0010054|CHV|||  
CAD|atherosclerotic heart disease|C0010054|||C0010054|CHV|||  
CAD|beta-1,4-N-acetyl-galactosaminyl transferase 2|C0648330|||C1428349|HUGO|||  
CAD|cadaver|C0006629|||C0006629|CHV;CSP;MSH;NDFRT;SNOMEDCT|||1  
CAD|cadaver donor|C0524354;C1548660|||1  
CAD|cadaveric|||||1|0.0031|1  
CAD|cadaveric donor|||||1|0.0013|  
CAD|calcium alginate dressing|||||1  
CAD|caldesmon|C0006746|||||1  
CAD|carbamoyl-phosphate synthetase 2, aspartate transcarbamylase, and dihydroorotase||||C1413078|HUGO|||  
CAD|cardiac ischaemia|C0010054;C0151744|||C0010054|CHV|||  
CAD|cardiac ischemia|C0010054;C0151744|||C0010054|CHV|||  
CAD|caspase-activated deoxyribonuclease|C0669174|||C0669174|MSH;MTH|1|0.0016|  
CAD|chronic actinic dermatitis|C1510437|||C1510437|CHV;MSH;SNOMEDCT|1|0.005|1  
CAD|chronic airways disease|C0024117|||||1  
CAD|chronic allograft dysfunction|||||1|0.0015|  
CAD|cinnamyl alcohol dehydrogenase|C0055763|||C0055763|MSH|||  
CAD|coenzyme A dehydrogenase|||||1  
CAD|cold agglutinin disease|C0175816|||C0175816|CHV;MSH;SNOMEDCT|||1  
CAD|collision-activated dissociation|||||1|0.0029|  
CAD|collisionally activated decomposition|||||1|0.0023|  
CAD|collisionally activated dissociation|||||1|0.0101|1  
CAD|compound absorption device|||||1  
CAD|compressed-air disease|C0011119|||||1

CAD|computer assisted diagnosis|C0011905|||C0011905|CHV;CSP|||  
CAD|computer-aided design|C0162517|||C0162517|MSH|1|0.0146|  
CAD|computer-aided detection|||1|0.0159|1  
CAD|computer-aided diagnosis|C0011905|||C0011905|AOD;CHV;NCI|1|0.0193|1  
CAD|computer-aided diagnostic|||1|0.0024|  
CAD|computer-assisted diagnosis|C0011905|||1|  
CAD|computer-assisted dialogue|||1|  
CAD|congenital abduction deficiency|||1|  
CAD|constitutive activation domain|||1|0.001|  
CAD|coronary arteriosclerosis|C0010054|||C0010054|CHV|||  
CAD|coronary artery atherosclerosis|C0010054|||C0010054|CHV|||  
CAD|coronary artery diameter|||1|0.0008|  
CAD|coronary artery  
disease|C0010054;C0010068;C1956346|1|1.000|C0010054;C0010068;C1956346|CHV;COSTAR  
;CSP;DXP;LNC;MEDLINEPLUS;MSH;MTH;NCI;NDFRT;OMIM;SNOMEDCT|1|0.9018|1  
CAD|coronary artery diseases|C0010054;C1956346|||C0010054|CHV|||  
CAD|coronary artery disorder|C1956346|||C1956346|AOD|||  
CAD|coronary atheroma|C0010054;C0264683|||C0010054|CHV|||  
CAD|coronary atherosclerosis|C0010054;C2733225|||C0010054|CHV|1|0.0018|  
CAD|coronary disease|C0010068|||C0010068|CHV|||  
CAD|coronary diseases|C0010068|||C0010068|CHV|||  
CAD|coronary disorder|C0010068|||C0010068|CHV;CSP|||  
CAD|coronary heart  
disease|C0010054;C0010068|||C0010054;C0010068|AOD;CHV;CSP;NCI|||  
CAD|coronary heart diseases|C0010068|||C0010068|CHV|||  
CAD|coronary sclerosis|C0010054|||C0010054|CHV|||  
CAD|coronoradiographic documentation|||1|  
CAD|cyclophosphamide, dacarbazine, and doxorubicin chemotherapy  
protocol|||C0170509|CHV|||  
CAD|cyclophosphamide/dacarbazine/doxorubicin|||C0170509|PDQ|||  
CAD|cyclophosphamide/dacarbazine/doxorubicin protocol|C0170509|||C0170509|MTH|||  
CAD|cytarabine/daunorubicin|||C0280573|PDQ|||  
CAD|cytarabine/daunorubicin (CAD)|||C0280573|CHV|||  
CAD|cytarabine/daunorubicin protocol|||C0280573|MTH|||  
CAD|ischaemic heart disease|C0010054;C0151744|||C0010054|CHV|||  
CAD|myocardial ischaemia|C0010054;C0151744|||C0010054|CHV|||  
CAD|myocardial ischemia|C0010054;C0151744|||C0010054|CHV|||  
CAD|smooth muscle caldesmon|||1|0.0015|  
CA|(7R)-7-(4-carboxybutanamido)cephalosporanate amidohydrolase  
activity|||C2314861|GO|||  
CA|(Neoplasms) or (cancers)|||C0006826|SNOMEDCT|||  
CA|(Neoplasms) or (cancers) (disorder)|||C0006826|SNOMEDCT|||  
CA|7beta-(4-carboxybutanamido)cephalosporanic acid acylase  
activity|||C2314861|GO|||  
CA|AC|C1879503|||C0050385|PDQ|||  
CA|AC chemotherapy protocol|C0050385|||C0050385|CHV|||  
CA|AC protocol|C0050385|||C0050385|MSH|||  
CA|ACE|C0022709;C0201888|||C0050385|CSP|||  
CA|ACe|C0022709;C0201888|||C0050385|NCI;PDQ|||  
CA|Ammon Horn|C0019564|||C0019564|MSH|||  
CA|Ammon's Horn|C0019564|||C0019564|MSH|||  
CA|Ammon's horn|C0019564|||C0019564|AOD;CSP;FMA|||  
CA|Ammons Horn|C0019564|||C0019564|MSH|||  
CA|Assay|C0005507;C0243073;C1510438|||1|0.0021|  
CA|BLOOD COAG FACTOR IV|||C0006675|MSH|||  
CA|Blood Coagulation Factor IV|C0006675|||C0006675|MSH;NDFRT|||

CA|CA|||C0006675;C0006754;C0006823;C0006826;C0019564;C0050385;C0201925;C2314861  
|CHV;GO;NCI;PDQ|||  
CA|CA - Cancer|C0006826||C0006826|SNOMEDCT|||  
CA|CA protocol|C0050385||C0050385|MSH|||  
CA|CALCIUM|C0006675;C0006726;C2936886||C0006675|MTHSPL;NCI;NDFRT;VANDF|||  
CA|CAN|||C0006823|NCI|||  
CA|CANADA|C0006823||C0006823|NCI|||  
CA|CANCER|C0006826;C0998265;C1306459||C0006826|CST;DXP;NCI|||  
CA|CANCER (NOS)|C0006826;C0998265;C1306459||C0006826|CST|||  
CA|COAG FACTOR IV|||C0006675|MSH|||  
CA|CTX/DOX|||C0050385|NCI;PDQ|||  
CA|Ca|||C0006675|AOD;NCI|||  
CA|Ca - Calcium|C0006675||C0006675|SNOMEDCT|||  
CA|Ca - unspecified site|||C0006826|SNOMEDCT|||  
CA|Ca - unspecified site NOS|||C0006826|SNOMEDCT|||  
CA|Ca - unspecified site NOS (disorder)|||C0006826|SNOMEDCT|||  
CA|Ca element|C0006675||C0006675|CSP|||  
CA|Ca++ element|C0006675||C0006675|CSP|||  
CA|Calcium|C0006675;C0006726;C2936886||C0006675;C0201925|LCH;LNC;MEDLINEPLUS;MS  
H;MTH;NCI;NDFRT;RXNORM;SNOMEDCT;USPMG|||  
CA|Calcium (NOS)|C0006675;C0006726;C2936886||C0006675|NCI|||  
CA|Calcium (substance)|||C0006675|SNOMEDCT|||  
CA|Calcium Measurement|C0201925||C0201925|NCI|||  
CA|Calcium [Chemical/Ingredient]|||C0006675|NDFRT|||  
CA|Calcium analyte|||C0006675|SNOMEDCT|||  
CA|Calcium analyte (substance)|||C0006675|SNOMEDCT|||  
CA|Calcium coagulation factor|C0006675||C0006675|SNOMEDCT|||  
CA|Calcium level|C0201925;C0428302||C0201925|SNOMEDCT|||  
CA|Calcium measurement|C0201925||C0201925|MTH;SNOMEDCT|||  
CA|Calcium measurement (procedure)|||C0201925|SNOMEDCT|||  
CA|Calcium measurement, NOS|C0201925||C0201925|SNOMEDCT|||  
CA|Calcium, NOS|C0006675;C0006726;C2936886||C0006675|SNOMEDCT|||  
CA|Calcium.total|C0201925||C0201925|LNC|||  
CA|California|C0006754;C0324542;C3146274|1|0.004|C0006754|AOD;CHV;LCH;LNC;MSH;MT  
H;NCI;SNOMEDCT|1|0.0024|1  
CA|California (geographic location)|||C0006754|SNOMEDCT|||  
CA|Canada|C0006823||C0006823|AOD;CHV;CSP;HL7V3.0;LCH;MSH;MTH;NCI;SNOMEDCT|||  
CA|Canada (geographic location)|||C0006823|SNOMEDCT|||  
CA|Cancer|C0006826;C0998265;C1306459||C0006826|LCH;LNC;MEDLINEPLUS;MSH;NCI;SNOM  
EDCT|||  
CA|Cancer, unspecified site|C0006826||C0006826|MTHICD9|||  
CA|Cancers|C0006826||C0006826|MEDLINEPLUS;MSH;SNOMEDCT|||  
CA|Candida albicans|C0006837;C0717551|||1|0.0108|1  
CA|Caucasian American|C0221786|||1|0.001|  
CA|Cholic|||1|0.0031|  
CA|Chromosome aberrations|C0008625;C0008626|||1|0.0345|  
CA|Coagulation Factor IV|C0006675||C0006675|MSH;NDFRT|||  
CA|Coagulation factor IV|C0006675||C0006675|SNOMEDCT|||  
CA|Coagulation factor IV (substance)|||C0006675|SNOMEDCT|||  
CA|Coagulation factor IV -RETIRED-|||C0006675|SNOMEDCT|||  
CA|Cocaine Anonymous|||1|  
CA|Cold agglutinins|C0056097|||1|0.0099|  
CA|Cornu Ammonis|C0019564||C0019564|MSH;NCI|||  
CA|Cornu ammonis|C0019564||C0019564|FMA|||  
CA|Cyclophosphamide/Doxorubicin|||C0050385|NCI|||  
CA|Doxorubicin/Cyclophosphamide|C0050385||C0050385|NCI|||  
CA|Factor IV|C0006675||C0006675|LNC;MSH;NDFRT|||

CA|Factor IV, Coagulation|C0006675|||C0006675|MSH|||  
CA|GA|||C2314861|GO|||  
CA|GCA|C0039483;C1423891;C2314861|||C2314861|GO|||  
CA|GL-7-ACA acylase activity|C2314861|||C2314861|GO|||  
CA|Hippocampal|C0019564|||C0019564|NCI|||  
CA|Hippocampal structure|C0019564|||C0019564|SNOMEDCT|||  
CA|Hippocampal structure (body structure)|||C0019564|SNOMEDCT|||  
CA|Hippocampus|C0019564;C0949582;C1029104;C1284077|||C0019564|FMA;MSH;NCI;SNOMEDCT|||  
CA|Hippocampus (Brain)|C0019564|||C0019564|LCH;MTH|||  
CA|Hippocampus major|C0019564|||C0019564|FMA|||  
CA|Hippocampus proper|||C0019564|FMA|||  
CA|Hippocampus proprius|C0019564|||C0019564|FMA|||  
CA|Horn, Ammon|C0019564|||C0019564|MSH|||  
CA|Horn, Ammon's|C0019564|||C0019564|MSH|||  
CA|MALIGNANCIES|C0006826|||C0006826|CST|||  
CA|MALIGNANCY|C0006826;C1306459|||C0006826|COSTAR;CST|||  
CA|MALIGNANT NEOPLASM|C0006826;C1306459|||C0006826|NCI|||  
CA|MALIGNANT TUMOR|C0006826;C1306459|||C0006826|COSTAR|||  
CA|Malignancy|C0006826;C1306459|||C0006826|AIR;LNC;MEDLINEPLUS;NCI|||  
CA|Malignancy, unspecified site|C0006826|||C0006826|MTHICD9|||  
CA|Malignant Neoplasm|C0006826;C1306459|||C0006826|NCI|||  
CA|Malignant Neoplasms|C0006826|||C0006826|MTH|||  
CA|Malignant Tumor|C0006826;C1306459|||C0006826|NCI|||  
CA|Malignant neoplasm|C0006826;C1306459|||C0006826|SNOMEDCT|||  
CA|Malignant neoplasm NOS|C0006826;C1306459|||C0006826|SNOMEDCT|||  
CA|Malignant neoplasm of unspecified site|||C0006826|SNOMEDCT|||  
CA|Malignant neoplasm of unspecified site (disorder)|||C0006826|SNOMEDCT|||  
CA|Malignant neoplasm of unspecified site NOS|||C0006826|SNOMEDCT|||  
CA|Malignant neoplasm of unspecified site NOS (disorder)|||C0006826|SNOMEDCT|||  
CA|Malignant neoplasm without specification of site|C0006826|||C0006826|CCS;ICD9CM|||  
CA|Malignant neoplasms|C0006826|||C0006826|SNOMEDCT|||  
CA|Malignant neoplastic disease|C0006826|||C0006826|SNOMEDCT|||  
CA|Malignant neoplastic disease (disorder)|||C0006826|SNOMEDCT|||  
CA|Malignant tumor|C0006826;C1306459|||C0006826|SNOMEDCT|||  
CA|Malignant tumor (disorder)|||C0006826|SNOMEDCT|||  
CA|Malignant tumour|C0006826;C1306459|||C0006826|SNOMEDCT|||  
CA|Malignant tumour (disorder)|||C0006826|SNOMEDCT|||  
CA|NATO code for riot control agent bromobenzylcyanide|||||||1  
CA|NEOPLASM MALIGNANT|||C0006826|CST|||  
CA|Neoplasms - malignant|||C0006826|SNOMEDCT|||  
CA|[TN420] CALCIUM|C0006675|||C0006675|NDFRT|||  
CA|[X]Malignant neoplasm without specification of site|||C0006826|SNOMEDCT|||  
CA|[X]Malignant neoplasm without specification of site (disorder)|||C0006826|SNOMEDCT|||  
CA|abnormalities|C0000768;C0000769|||||1|0.0019|  
CA|about|||||||1  
CA|activity|C0026606;C0205177;C0439167;C0441655;C1561536|||||1|0.0049|  
CA|adenocarcinoma|C0001418|||||1|0.0019|  
CA|alcohol|C0001962;C0001975;C0202304|||||1|0.0021|  
CA|ammon's horn|C0019564|||C0019564|CHV|||  
CA|anterior commissure|C0152335;C1289546|||||||1  
CA|antigens|C0003320|||||1|0.0016|  
CA|arterial|C0003842;C0221464|||||1|0.0016|  
CA|caffeic acid|C0054433|||C0054433|CHV;MSH;NCI|1|0.0083|

CA|caffeine|C0006644|||C0006644;C0202348|AOD;CHV;CSP;LCH;LNC;MEDLINEPLUS;MSH;MTH  
;MTHSPL;NCI;NDFRT;PDQ;RXNORM;SNOMEDCT;VANDF|1|0.0057|  
CA|calcium|C0006675;C0006726;C2936886|||C0006675|AOD;CHV;CSP;NCI|1|0.286|1  
CA|calcium antagonist|C0006684|||C0006684|CHV;CSP|||1  
CA|calcium antagonists|||1|0.0047|  
CA|calcium level|C0201925;C0428302|||C0201925|CHV|||  
CA|calcium level test|C0201925|||C0201925|CHV|||  
CA|calcium levels|C0201925;C0428302|||C0201925|CHV|||  
CA|calcium measurement|C0201925|||C0201925|CHV|||  
CA|calcium measurements|C0201925|||C0201925|CHV|||  
CA|calciums|C0006675|||C0006675|CHV|||  
CA|cancer|C0006826;C0998265;C1306459|1|0.782|C0006826;C0998265;C1306459;C1547140  
|AOD;CHV;CSP;CST;DXP;HL7V2.5;LCH;LNC;MEDLINEPLUS;MSH;NCBI;NCI;PDQ;SNOMEDCT|1|0.0  
059|1  
CA|cancer antigen|||1|0.0056|1  
CA|cancers|C0006826|||C0006826|CHV|||  
CA|candle|||1|1  
CA|caproic acid|C0062655|||C0062655|AOD;CHV;FMA;NCI;SNOMEDCT|||1  
CA|capsid|C0006933;C1136102|||C0006933;C1136102|CHV;CSP;LNC;MSH;MTH;NCI|1|0.0168  
|1  
CA|capsid protein|C1136102|||1|0.0057|  
CA|carbohydrate antigen|C0443758|1|0.210|C0443758|CHV;SNOMEDCT|||1  
CA|carbonate apatite|C0054675|||1|0.0009|  
CA|carbonated apatite|||1|0.0009|  
CA|carbonic  
anhydrase|C0007028|||C0007028|CHV;CSP;LCH;MSH;NDFRT;SNOMEDCT|1|0.1301|1  
CA|carbonic anhydrase II|C0007034;C1413043|||1|0.001|  
CA|carcinoma|C0007097|||C0007097|AOD;CHV;COSTAR;CSP;CST;DXP;MEDLINEPLUS;MSH;MTH;  
NCI;NDFRT;SNOMEDCT|1|0.0114|1  
CA|cardiac angiography|C0002971|||1|1  
CA|cardiac  
arrest|C0018790|||C0018790|AOD;CHV;COSTAR;CSP;CST;DXP;ICD9CM;LCH;MEDLINEPLUS;MSH  
;MTH;NCI;NDFRT;OMIM;SNOMEDCT|1|0.0201|1  
CA|cardiac  
arrhythmia|C0003811;C1560249|||C0003811;C1560249|AOD;CHV;COSTAR;MSH;MTH;NCI;NDFR  
T;OMIM;SNOMEDCT|||1  
CA|cardiac-apnea|||1|1  
CA|carotid  
artery|C0007272;C0162859|||C0007272;C0162859|AOD;CHV;CSP;FMA;LCH;LNC;MSH;NCI;SNO  
MEDCT;UWDA|1|0.0137|1  
CA|cast|C0179686;C0302143|||C0179686;C0302143;C0687709;C1366482;C1413137;C153908  
0;C1705948;C1825060|AOD;CHV;HUGO;NCI;OMIM;SNOMEDCT|||1  
CA|catalase|C0007367;C1413138|||1|0.0021|  
CA|catecholamine|C0007412|||1|0.0975|1  
CA|catecholaminergic|||1|0.0144|1  
CA|catheter ablation|C0162563|||1|0.0017|  
CA|cathode|C0007441|||C0007441|CSP;MSH|||1  
CA|celiac  
artery|C0007569;C1268965|||C0007569;C1268965|CHV;FMA;LCH;LNC;MSH;MTH;SNOMEDCT;UW  
DA|||1  
CA|celiac axis|C0007569;C1268965|||C0007569;C1268965|CHV;SNOMEDCT|||1  
CA|cellular automata|||1|0.0035|  
CA|cellular automaton|||1|0.0016|  
CA|cellulose acetate|C0050505|||C0050505|CHV;MSH;NDFRT;SNOMEDCT;VANDF|1|0.0168|1  
CA|central apnea|C0520680|||1|1  
CA|central nucleus of the amygdala|||1|0.0012|  
CA|cephalosporin C acylase activity|C2314861|||C2314861|GO|||

CA|cephalosporin acylase activity|C2314861|||C2314861|GO|||  
CA|cerebellar atrophy|C0740279|||1|0.0023|  
CA|cerebral  
aqueduct|C0007769;C1284576|||C0007769;C1284576|AOD;CHV;CSP;FMA;MSH;MTH;NCI;SNOME  
DCT|||1  
CA|cerebral  
atrophy|C0235946|||C0235946|AOD;CHV;COSTAR;CST;MTH;OMIM;SNOMEDCT|1|0.0024|1  
CA|cerebral autoregulation|||1|0.0052|  
CA|chemotactic activity|||1  
CA|child abuse|C0008060;C1541830|||1  
CA|chloroamphetamine|C2599027|||C2599027|LNC|||  
CA|choanal atresia|C0008297|||1|0.0016|  
CA|cholate|C0109497|||1|0.0024|  
CA|cholic acid|C0055568|||C0055568|AOD;CHV;LCH;MSH;NCI;NDFRT;SNOMEDCT|1|0.0205|1  
CA|chorioamnionitis|C0008495|||1  
CA|chromosomal aberration|C0008625|||C0008625|CHV;MSH;NCI|||1  
CA|chromosomal aberrations|C0008625;C0008626|||1|0.0279|  
CA|chromosome aberration|C0008625|||C0008625|CHV;CSP;MSH;NCI|||  
CA|chronic anovulation|||1  
CA|chronologic age|||1  
CA|chronological age|||1|0.026|  
CA|circulatory arrest|C0444720|||C0444720|CHV;SNOMEDCT|||  
CA|citric  
acid|C0055819;C1171556|||C0055819;C1171556|CHV;MSH;MTH;MTHSPL;NCI;NDFRT;RXNORM;S  
NOMEDCT;VANDF|1|0.0087|1  
CA|clavulanic  
acid|C0055860|||C0055860|CHV;LCH;MSH;MTHSPL;NCI;NDFRT;RXNORM;SNOMEDCT|||  
CA|clotting assay|||1  
CA|cluster analysis|C0009085|||1|0.0036|  
CA|coagglutination|C0441689|||C0441689|CHV;SNOMEDCT|||1  
CA|coarctation of aorta|C0003492|||1  
CA|coarctation of the  
aorta|C0003492;C2930803|||C0003492;C2930803|CHV;COSTAR;MSH;OMIM|1|0.0017|  
CA|cobblestone areas|||1|0.0009|  
CA|cochlear aqueduct|C0009196|||1|0.0026|  
CA|coefficient of absorption|||1  
CA|cold adapted|||1|0.0012|  
CA|cold agglutinin|C0056097|||C0056097|CHV;LNC;NCI;SNOMEDCT|||1  
CA|cold-acclimated|||1|0.0068|  
CA|cold-acclimated rats|||1|0.0017|  
CA|collagen antigen|||1  
CA|collagenolytic activity|||1  
CA|colloid antigen|||1  
CA|commissura anterior|C0152335|||C0152335|FMA|||  
CA|common antigen|||1  
CA|community acquired|C0456394|||1  
CA|community-acquired|C0456394|||1|0.0026|  
CA|complement activation|C0009528;C2984768|||1|0.001|  
CA|compressed air|C0337081|||C0337081|CHV;MSH;SNOMEDCT|||1  
CA|concentration|C0086045;C1446561|||1|0.004|  
CA|conception age|||1  
CA|conditioned abstinence|C0683359|||1  
CA|conditioned air|||1  
CA|condyloma acuminata|C0009663|||1|0.0016|  
CA|condyloma acuminatum|C0009663|||1|0.0035|1  
CA|condylomata acuminata|C0009663|||1|0.0017|  
CA|congenital anomaly|C0000768|||1

CA|congruence angle|||||1|0.001|  
CA|conjoint analysis|||||1|0.0024|  
CA|constitutively activated|||||1|0.001|  
CA|constitutively active|||||1|0.0054|  
CA|contact angle|||||1|0.0012|  
CA|continuous aerosol|||||1|  
CA|contrast agent|C0009924|||C0009924|CHV;NCI|1|0.0064|  
CA|contrast arteriography|||||1|0.0026|  
CA|controlled atmosphere|||||1|0.0014|  
CA|conventional angiography|C0442842|||C0442842|SNOMEDCT|1|0.0029|  
CA|conventional arteriography|||||1|0.0014|  
CA|conversation analysis|||||1|0.0024|  
CA|coracoacromial|||||1|  
CA|corneal abrasion|C0010032|||||1|  
CA|cornu ammonis|C0019564|||C0019564|CHV;CSP;FMA;MSH;NCI|1|0.0066|  
CA|coronary  
angiography|C0085532;C1548829|||C0085532;C1548829|AOD;CHV;HL7V2.5;MSH;MTH;SNOMED  
CT|1|0.0121|  
CA|coronary angioplasty|C0002997;C0190211|||||1|  
CA|coronary arrest|||||1|  
CA|coronary arteriography|C0085532|||||1|0.0017|  
CA|coronary  
artery|C0205042;C1269008|||C0205042;C1269008|CHV;CSP;FMA;MSH;MTH;NCI;SNOMEDCT;UW  
DA|1|0.0161|1|  
CA|coronary atherosclerosis|C0010054;C2733225|||||1|0.0012|  
CA|corpora allata|C0010085|||C0010085|MSH|1|0.0165|1|  
CA|corpora  
amylacea|C0333564;C1235668|||C0333564;C1235668|MTH;NCI;SNOMEDCT;UWDA|1|0.0043|  
CA|corpus albicans|C0227895|||C0227895|FMA;UWDA|||1|  
CA|corpus allatum|C0010085|||C0010085|CSP;MSH|1|0.0056|  
CA|corpus amylaceum|||||1|  
CA|corrected area|||||1|  
CA|correspondence analysis|||||1|0.0029|  
CA|cortical area|||||1|0.0033|  
CA|cortisone  
acetate|C0056391|||C0056391|CHV;MSH;MTHSPL;NCI;NDFRT;RXNORM;SNOMEDCT;USPMG;VANDF  
|1|0.0057|  
CA|cricoarytenoid|||||1|  
CA|cricoid arch|||||1|  
CA|croup-associated|||||1|  
CA|croup-associated virus|C0030391|||C0030391|MSH|||  
CA|cyclophosphamide doxorubicin (AC protocol)|||C0050385|CHV|||  
CA|cyclophosphamide doxorubicin (AC) protocol|||C0050385|CHV|||  
CA|cyclophosphamide/doxorubicin|||C0050385|PDQ|||  
CA|cyclophosphamide/doxorubicin protocol|C0050385|||C0050385|MTH|||  
CA|cyproterone  
acetate|C0056855|||C0056855|CHV;MSH;NCI;NDFRT;PDQ;RXNORM;SNOMEDCT|1|0.0186|  
CA|cytosine  
arabinoside|C0010711|||C0010711|CHV;CSP;MSH;NCI;NDFRT;PDQ;SNOMEDCT|1|0.0038|1|  
CA|cytotoxic antibody|C0024284|||C0024284|SNOMEDCT|||1|  
CA|doxorubicin cyclophosphamide|C0050385|||C0050385|CHV|||  
CA|factor iv|C0006675|||C0006675|CHV|||  
CA|glutaryl-7-ACA acylase activity|C2314861|||C2314861|GO|||  
CA|glutaryl-7-aminocephalosporanic acid acylase  
activity|C2314861|||C2314861|GO|||  
CA|glutaryl-7-aminocephalosporanic-acid acylase  
activity|C2314861|||C2314861|GO;MTH|||

CA|highly polymorphic|||||1|0.0009|  
CA|hippocampus||||C0019564|CHV|||  
CA|hippocampus|C0019564;C0949582;C1029104;C1284077|||C0019564|AOD;CHV;CSP|||  
CA|isolated a polymorphic dinucleotide|||||1|0.0012|  
CA|live attenuated cold-adapted|||||1|0.0007|  
CA|malignancies|C0006826|||C0006826|CHV|||  
CA|malignancy|C0006826;C1306459|||C0006826|NCI|||  
CA|malignant neoplasm|C0006826;C1306459|||C0006826|AOD;CHV|||  
CA|malignant neoplasms|C0006826|||C0006826|CHV|||  
CA|malignant tumor|C0006826;C1306459|||C0006826|AOD;CHV|||  
CA|malignant tumoral disease|C0006826|||C0006826|AOD|||  
CA|malignant tumours|C0006826|||C0006826|CHV|||  
CA|malignant tumour|C0006826;C1306459|||C0006826|CHV|||  
CA|malignant tumours|C0006826|||C0006826|CHV|||  
CA|measurement of compressed air|||||1|0.0007|  
CA|neoplasm/cancer||||C0006826|CSP|||  
CA|plasma catecholamines|||||1|0.0057|  
CA|total calcium test|C0201925|||C0201925|CHV|||  
CA|weeks of conceptional age|||||1|0.0007|  
CBC|Blood Cell Count|C0005771;C0009555|||C0009555|NCI|||  
CBC|Blood Count, Complete|C0009555|||C0009555|MSH|||  
CBC|Blood Counts, Complete|C0009555|||C0009555|MSH|||  
CBC|CBC|C0009555;C2263086|||C0009555;C2263086|CHV;CSP;GO;LNC;MTH;NCI;SNOMEDCT|||  
CBC|CBC (complete blood count)|||C0009555|CSP|||  
CBC|CBC, NOS|C0009555;C2263086|||C0009555|SNOMEDCT|||  
CBC|Camelot Behavioral Checklist|||||1|  
CBC|Chlorambucil|C0008163|||||1|0.0471|  
CBC|Complete Blood Count|C0009555|||C0009555|MSH;MTH;NCI|||  
CBC|Complete Blood Counts|C0009555|||C0009555|MSH|||  
CBC|Complete blood count|C0009555|||C0009555|SNOMEDCT|||  
CBC|Complete blood count (procedure)|||C0009555|SNOMEDCT|||  
CBC|Complete blood count, NOS|C0009555|||C0009555|SNOMEDCT|||  
CBC|Count, Complete Blood|C0009555|||C0009555|MSH|||  
CBC|Counts, Complete Blood|C0009555|||C0009555|MSH|||  
CBC|FBC|C0009555|||C0009555|NCI|||  
CBC|FBC - Full blood count|C0009555|||C0009555|SNOMEDCT|||  
CBC|Full Blood Count|C0009555|||C0009555|NCI|||  
CBC|Full blood count|C0009555|||C0009555|SNOMEDCT|||  
CBC|Full blood count (procedure)|||C0009555|SNOMEDCT|||  
CBC|Full blood count NOS|C0009555|||C0009555|SNOMEDCT|||  
CBC|Full blood count NOS (procedure)|||C0009555|SNOMEDCT|||  
CBC|Nuclear cap binding complex location|C2263086|||C2263086|MTH|||  
CBC|binding capacity|C0439155|||||1|0.0576|  
CBC|blood cell count|C0005771;C0009555|||C0009555|NCI|||  
CBC|blood test full count|C0009555|||C0009555|CHV|||  
CBC|cannabichromene|C0054589|||||1|0.0628|  
CBC|cerebral-buccal connective|||||1|0.0314|  
CBC|cerebrobuccal connective|||||1|  
CBC|child behavior characteristics|||||1|  
CBC|complete blood count|C0009555|1|1.000|C0009555|CHV;CSP;MTH;NCI|1|0.6597|1|  
CBC|complete blood count test (CBC)|||C0009555|CHV|||  
CBC|complete blood counts|C0009555|||C0009555|CHV|||  
CBC|contralateral breast cancer|C1096616|||||1|0.0838|  
CBC|full blood count|C0009555|||C0009555|CHV|||  
CBC|full blood count test|C0009555|||C0009555|CHV|||  
CBC|nuclear cap binding complex|C2263086|||C2263086|GO|||  
CBC|nuclear cap binding complex location|C2263086|||C2263086|GO|||

CBC|nuclear cap-binding complex|C2263086|||||1|0.0576|  
CD4|ANTIGENS CD 004||||C0003323|MSH|||  
CD4|Antigen, CD4|C0003323;C1332714||||C0003323|MSH|||  
CD4|Antigens, CD4|C0003323||||C0003323|MSH;NDFRT|||  
CD4|Antigens, CD4 [Chemical/Ingredient]||||C0003323|NDFRT|||  
CD4|Antigens, T-Cell T4|C0003323||||C0003323|MSH|||  
CD4|CD 004 ANTIGENS||||C0003323|MSH|||  
CD4|CD 004 MOLECULE||||C0003323|MSH|||  
CD4|CD 004 RECEPTORS||||C0003323|MSH|||  
CD4|CD4||||C0003323;C1332714;C2698595|HUGO;LNC;NCI;OMIM|||  
CD4|CD4 - Cluster of differentiation antigen 4|C0003323||||C0003323|SNOMEDCT|||  
CD4|CD4 ANTIGEN|C0003323;C1332714||||C1332714|OMIM|||  
CD4|CD4 Ag|C0003323||||C0003323|LNC|||  
CD4|CD4 Antigen|C0003323;C1332714||||C0003323|LNC;MSH;NCI;NDFRT|||  
CD4|CD4 Antigen (P55)||||C0003323|NCI|||  
CD4|CD4 Antigen (P55) Gene||||C1332714|NCI|||  
CD4|CD4 Antigens|C0003323||||C0003323|MSH;MTH;NDFRT|||  
CD4|CD4 Expressing T Cell Count|C2698595||||C2698595|MTH;NCI|||  
CD4|CD4 Gene|C1332714||||C1332714|NCI|||  
CD4|CD4 Molecule|C0003323;C1332714||||C0003323|MSH;NDFRT|||  
CD4|CD4 Protein|C0003323||||C0003323|NCI|||  
CD4|CD4 RECEPT||||C0003323|MSH|||  
CD4|CD4 Receptor, Surface|C0003323||||C0003323|MSH|||  
CD4|CD4 Receptors|C0003323||||C0003323|MSH;NDFRT|||  
CD4|CD4 Receptors, Surface|C0003323||||C0003323|MSH|||  
CD4|CD4 antigen|C0003323;C1332714||||C0003323|CHV|||  
CD4|CD4 gene|C1332714||||C1332714|HUGO;MTH|||  
CD4|CD4 molecule|C0003323;C1332714||||C0003323;C1332714|CSP;HUGO|||  
CD4|Cluster of differentiation antigen 4|C0003323||||C0003323|SNOMEDCT|||  
CD4|Leucocyte 3a|C0003323||||C0003323|SNOMEDCT|||  
CD4|Leucocyte 3a|C0003323||||C0003323|SNOMEDCT|||  
CD4|Lymphocyte antigen CD4|C0003323||||C0003323|SNOMEDCT|||  
CD4|Lymphocyte antigen CD4 (substance)||||C0003323|SNOMEDCT|||  
CD4|OKT4 - Ortho Kung T4|C0003323||||C0003323|SNOMEDCT|||  
CD4|OKT4 Antigen|C0003323||||C0003323|NCI|||  
CD4|OKT4 antigen|C0003323||||C0003323|CSP|||  
CD4|Ortho Kung T4|C0003323||||C0003323|SNOMEDCT|||  
CD4|RECEPT CD4||||C0003323|MSH|||  
CD4|RECEPT SURFACE CD4||||C0003323|MSH|||  
CD4|RECEPTORS CD 004||||C0003323|MSH|||  
CD4|Receptors, CD4|C0003323||||C0003323|MSH;NDFRT|||  
CD4|Receptors, Surface CD4|C0003323||||C0003323|MSH;NDFRT|||  
CD4|SURFACE CD4 RECEPT||||C0003323|MSH|||  
CD4|Surface CD4 Receptor|C0003323||||C0003323|MSH;NDFRT|||  
CD4|Surface CD4 Receptors|C0003323||||C0003323|MSH|||  
CD4|T AAB ANTIGENS T CELL 04||||C0003323|MSH|||  
CD4|T helper cells|C0018894|||||1|0.2143|  
CD4|T helper/inducer|||||1|0.0893|  
CD4|T-CELL ANTIGEN T4/LEU3||||C1332714|OMIM|||  
CD4|T-Cell Antigen T4/Leu3||||C0003323|NCI|||  
CD4|T-Cell Surface Antigen T4/Leu-3||||C0003323|NCI|||  
CD4|T-Cell T4 Antigens|C0003323||||C0003323|MSH|||  
CD4|T-cell lineage 4|C0003323||||C0003323|SNOMEDCT|||  
CD4|T-helper cell marker|C0003323||||C0003323|SNOMEDCT|||  
CD4|T4 - T-cell lineage 4|C0003323||||C0003323|SNOMEDCT|||  
CD4|T4 Antigens, T Cell|C0003323||||C0003323|MSH|||  
CD4|T4 Antigens, T-Cell|C0003323||||C0003323|MSH;NDFRT|||

CD4|T4 molecule|C0003323|||C0003323|CSP|||  
 CD4|anti-L3T4|||1|0.4107|  
 CD4|cd4|||C0003323|CHV|||  
 CD4|cd4 receptor|C0003323|||C0003323|CHV|||  
 CD4|cd4 receptors|C0003323|||C0003323|CHV|||  
 CD4|cluster of differentiation 4||1|1.000|||1  
 CD4|helper T lymphocyte marker|C0003323|||C0003323|CSP|||  
 CD4|receptor|C0597357|||1|0.2857|  
 CDI|1,1'-carbonyldiimidazole|||1|0.0505|  
 CDI|CD-I|C0282601;C1151574|||C0282601|MSH;NCI|||  
 CDI|CDI|C0282601|||C0282601|NCI|||  
 CDI|CDI (Compact Disc-Interactive)|||C0282601|NCI|||  
 CDI|Ca(2+)-dependent inactivation|||1|0.0189|  
 CDI|Children's Depression Inventory||1|0.540||1|0.3249|1  
 CDI|Color Doppler imaging|||1|0.3565|  
 CDI|Compact Disc-Interactive|C0282601|||C0282601|NCI|||  
 CDI|Compact Disk Interactive|C0282601|||C0282601|MSH;MTH|||  
 CDI|Compact Disk, Interactive|C0282601|||C0282601|MSH|||  
 CDI|Compact Disks, Interactive|C0282601|||C0282601|MSH|||  
 CDI|Cotrel-Dubousset instrumentation|||1|0.0946|1  
 CDI|Disk, Interactive Compact|C0282601|||C0282601|MSH|||  
 CDI|Disks, Interactive Compact|C0282601|||C0282601|MSH|||  
 CDI|Interactive CD|C0282601|||C0282601|NCI|||  
 CDI|Interactive Compact Disk|C0282601|||C0282601|MSH|||  
 CDI|Interactive Compact Disks|C0282601|||C0282601|MSH|||  
 CDI|cell-directed inhibitor|||1|  
 CDI|center for diagnostic imaging||1|0.450|||1  
 CDI|central diabetes insipidus|C0687720|||1|0.142|1  
 CDI|chronic diabetes insipidus|||1|  
 CDI|clam digger's itch|C0546996|||1|  
 CDI|clean, dry, intact||1|0.006|||1  
 CDI|color Doppler imaging|||1|  
 CDI|communicative development inventory|||1|  
 CDI|controlled diabetes insipidus|||1|  
 CDI|cranial diabetes insipidus|C0687720|||1|  
 CDI|cyclin-dependent kinase inhibitor|C0919418;C1152568;C1511576|||1|0.0126|  
 CEA|ANTIGENS CD 066E|||C0007082|MSH|||  
 CEA|Antigen, CD66e|C0007082|||C0007082|MSH;NDFRT|||  
 CEA|Antigen, Carcinoembryonic|C0007082|||C0007082|MSH|||  
 CEA|Antigens, CD66e|C0007082|||C0007082|MSH;NDFRT|||  
 CEA|CARCINOEMBRYONIC ANTIGEN|C0007082|||C1332744|OMIM|||  
 CEA|CARCINOEMBRYONIC ANTIGEN-RELATED CELL ADHESION MOLECULE  
 5|C0007082;C1332744|||C1332744|OMIM|||  
 CEA|CD 066 E ANTIGEN|||C0007082|MSH|||  
 CEA|CD66e|||C0007082;C1332744;C1706545|HUGO;LNC;NCI|||  
 CEA|CD66e Ag|C0007082|||C0007082|LNC|||  
 CEA|CD66e Antigen|C0007082|||C0007082|LNC;MSH;NCI;NDFRT|||  
 CEA|CD66e Antigens|C0007082|||C0007082|MSH|||  
 CEA|CEA|C0201933|||C0007082;C0201933;C1332744;C1332745;C1418994;C1706545|CSP;HUG  
 O;MSH;NCI;OMIM;SNOMEDCT|||  
 CEA|CEA - Carcinoembryonic antigen|C0007082|||C0007082|SNOMEDCT|||  
 CEA|CEA Family Protein|C0007082|||C0007082|NCI|||  
 CEA|CEA measurement|C0201933|||C0201933|SNOMEDCT|||  
 CEA|CEACAM5|||C0007082;C1332744;C1706545|HUGO;NCI;OMIM|||  
 CEA|CEACAM5 Gene|C1332744|||C1332744|NCI|||  
 CEA|CEACAM5 gene|C1332744|||C1332744|HUGO;MTH|||  
 CEA|CEACAM5 wt Allele|C1706545|||C1706545|MTH;NCI|||

CEA|CEACAM7|C1332745;C1332746|||C1332745|HUGO;NCI|||  
CEA|CEACAM7 Gene|C1332745|||C1332745|NCI|||  
CEA|CEACAM7 gene|C1332745|||C1332745|HUGO;MTH|||  
CEA|Carcinoembryonic Ag|C0007082|||C0007082|LNC|||  
CEA|Carcinoembryonic  
Antigen|C0007082|||C0007082;C0201933|LNC;MSH;MTH;NCI;NDFRT|||  
CEA|Carcinoembryonic Antigen CGM2|C0007082;C1332746|||C0007082|NCI|||  
CEA|Carcinoembryonic Antigen Family Protein|C0007082|||C0007082|NCI|||  
CEA|Carcinoembryonic Antigen Measurement|C0201933|||C0201933|NCI|||  
CEA|Carcinoembryonic Antigen [Chemical/Ingredient]|||C0007082|NDFRT|||  
CEA|Carcinoembryonic Antigen-Related Cell Adhesion Molecule  
5|C0007082;C1332744|||C0007082|NCI|||  
CEA|Carcinoembryonic Antigen-Related Cell Adhesion Molecule 5  
Gene|C1332744|||C1332744|NCI|||  
CEA|Carcinoembryonic Antigen-Related Cell Adhesion Molecule 5 wt  
Allele|C1706545|||C1706545|NCI|||  
CEA|Carcinoembryonic Antigen-Related Cell Adhesion Molecule 7  
Gene|C1332745|||C1332745|NCI|||  
CEA|Carcinoembryonic antigen|C0007082|||C0007082;C0201933|MTH;SNOMEDCT|||  
CEA|Carcinoembryonic antigen (substance)|||C0007082|SNOMEDCT|||  
CEA|Carcinoembryonic antigen level|||C0201933|SNOMEDCT|||  
CEA|Carcinoembryonic antigen measurement|C0201933|||C0201933|MTH;SNOMEDCT|||  
CEA|Carcinoembryonic antigen measurement (procedure)|||C0201933|SNOMEDCT|||  
CEA|Carcinoembryonic antigen: (& level)|||C0201933|SNOMEDCT|||  
CEA|Carcinoembryonic antigen: (& level) (procedure)|||C0201933|SNOMEDCT|||  
CEA|Carcinoembryonic antigens|C0007082|||C0007082|LCH|||  
CEA|Cost-effectiveness analysis|C1511536|||1|0.0184|  
CEA|Lymphocyte antigen CD66E|C0007082|||C0007082|SNOMEDCT|||  
CEA|Lymphocyte antigen CD66E (substance)|||C0007082|SNOMEDCT|||  
CEA|Meconium Antigen 100|C0007082|||C0007082|NCI|||  
CEA|PREGNANCY-SPECIFIC BETA-1-GLYCOPROTEIN 2|C1418994|||C1418994|OMIM|||  
CEA|PSBG2|C1418994|||C1418994|OMIM|||  
CEA|PSG1|C1418991;C1418994|||C1418994|HUGO|||  
CEA|PSG2|C1418994|||C1418994|HUGO;OMIM|||  
CEA|PSG2 gene|C1418994|||C1418994|HUGO;MTH|||  
CEA|PSGGB|C1418994|||C1418994|HUGO;OMIM|||  
CEA|carcinoembryonal antigen|C0007082|||C0007082|CSP|||  
CEA|carcinoembryonic|C1440204|||1|0.0018|  
CEA|carcinoembryonic Ag|C0007082|||1|0.0013|  
CEA|carcinoembryonic  
antigen|C0007082|1|0.888|C0007082;C0201933;C1332744|CHV;LNC;MSH;MTH;NCI;NDFRT;OM  
IM;SNOMEDCT|1|0.7935|1  
CEA|carcinoembryonic antigen SG8|C1418994|||C1418994|HUGO|||  
CEA|carcinoembryonic antigen gene family member  
2|C1332745;C1332746;C1706153|||C1332745|HUGO|||  
CEA|carcinoembryonic antigen test|C0201933|||C0201933|CHV|||  
CEA|carcinoembryonic antigen-related cell adhesion molecule  
5|C0007082;C1332744|||C1332744|HUGO|||  
CEA|carcinoembryonic antigen-related cell adhesion molecule  
7|C1332745;C1332746|||C1332745|HUGO|||  
CEA|carotid  
endarterectomy|C0014099|1|0.106|C0014099|CHV;COSTAR;MEDLINEPLUS;MSH;MTH;SNOMEDCT  
|1|0.1416|1  
CEA|central amygdala|||1|0.0064|  
CEA|central amygdaloid nucleus|C0175219|||1|0.0031|  
CEA|central nucleus of the amygdala|||1|0.0261|  
CEA|cervical epidural abscess|C1997613|||C1997613|SNOMEDCT|||



CF|Crude fiber|C2348013|||||1|0.0016|  
CF|Cyclophosphamide/Fluorouracil|C0055160|||C0055160|NCI|||  
CF|Cystic Fibrosis|C0010674|||C0010674|COSTAR;MEDLINEPLUS;MSH;MTH;NCI;NDFRT|||  
CF|Cystic Fibrosis [Disease/Finding]|||C0010674|NDFRT|||  
CF|Cystic fibrosis|C0010674|||C0010674|CCS;ICD9CM;LCH;LNC;SNOMEDCT|||  
CF|Cystic fibrosis (disorder)|||C0010674|SNOMEDCT|||  
CF|Cystic fibrosis (disorder) [Ambiguous]|||C0010674|SNOMEDCT|||  
CF|Cystic fibrosis NOS|C0010674|||C0010674|MTHICD9;SNOMEDCT|||  
CF|Cystic fibrosis NOS (disorder)|||C0010674|SNOMEDCT|||  
CF|Factor, Citrovorum|C0023413;C0731033|||C0731033|MSH;NCI|||  
CF|Fibrocystic disease|C0010674;C0016033;C0016034|||C0010674|SNOMEDCT|||  
CF|Fibrosis, Cystic|C0010674|||C0010674|MSH|||  
CF|Folate Calcium|C0731033|||C0731033|NCI|||  
CF|Folinate, Calcium|C0731033|||C0731033|MSH|||  
CF|Folinic Acid Calcium Salt Pentahydrate|C0731033|||C0731033|NCI;PDQ|||  
CF|In Cerebrospinal Fluid|C0007807|||C0007807|MTH|||  
CF|L-CF|C0731033|||C0731033|PDQ|||  
CF|LEUCOVORIN CALCIUM|C0731033|||C0731033|MTHSPL;NCI;NDFRT;VANDF|||  
CF|LV|C0023128;C0731033;C1881413|||C0731033|PDQ|||  
CF|Leucovorin Calcium|C0731033|||C0731033|MTH;MTHSPL;NCI;RXNORM;USPMG|||  
CF|Leucovorin calcium|C0731033|||C0731033|SNOMEDCT|||  
CF|Leucovorin calcium preparation|C0731033|||C0731033|SNOMEDCT|||  
CF|Leucovorin, Calcium|C0731033|||C0731033|MSH|||  
CF|Levofolinate calcium|C0731033|||C0731033|PDQ|||  
CF|MUCOVISCIDOSIS|C0010674|||C0010674|CST;DXP;OMIM|||  
CF|Mucoviscidosis|C0010674|||C0010674|MSH;MTHICD9;NDFRT;SNOMEDCT|||  
CF|P-FU|C0280055|||C0280055|NCI;PDQ|||  
CF|Republic of the Congo|C0009738|||C0009738|MSH;NCI|||  
CF|Ubangi-Shari|C0007673|||C0007673|MSH|||  
CF|With Food|C1883561|||C1883561|MTH;NCI|||  
CF|caffeine|C0006644|||||1|0.003|  
CF|calcaneal fibular|||||||1  
CF|calcium folinate|C0731033|||C0731033|CHV;PDQ|||  
CF|calcium leucovorin|C0731033|||C0731033|CHV;PDQ|||  
CF|calf blood flow|||||||1  
CF|calibration factor|C2347552|||C2347552|NCI|||1  
CF|californium|C0006758|||||||1  
CF|cancer free|||||||1  
CF|carbol-fuchsin|C0054697|||||||1  
CF|carbofuchsin|C0054697|||C0054697|MSH;SNOMEDCT|||  
CF|carboxyfluorescein|C0108453|||||1|0.0171|  
CF|cardiac  
failure|C0018801;C0018802|||C0018801;C0018802|CHV;CST;MEDLINEPLUS;MSH;NDFRT;OMIM  
;SNOMEDCT|1|0.0028|1  
CF|carotid foramen|||||||1  
CF|carrier-free|||||||1  
CF|cascade filtration|||||||1  
CF|case fatality|||||1|0.0013|  
CF|case file|||||||1  
CF|cationic ferritin|||||1|0.0038|  
CF|cationized ferritin|C0071525|||||1|0.0171|  
CF|cell-free|C1183428|||||1|0.0012|  
CF|central field|||||||1  
CF|central fossa|||||||1  
CF|centrifugal force|C0563531|||C0563531|SNOMEDCT|||1  
CF|cerebrospinal fluid|C0007806;C0007807|||C0007807|MSH|||  
CF|cf|||C1883561|NCI|||

CF|cf protocol|C0055160|||C0055160|CHV|||  
CF|characteristic frequency|||1|0.0364|1  
CF|charcoal-filtered air|||1|0.0017|  
CF|chemotactic factor|C0008013|||C0008013|CSP|||1  
CF|chest and left leg|||1|  
CF|chick fibroblast|||1|  
CF|chicken fat|||1|0.0009|  
CF|chloroform|C0008238|||1|0.0043|  
CF|choroid fissure|C0262212|||1|  
CF|chronic fatigue|C0518656|||1|0.0026|  
CF|chronicity factor|||1|  
CF|ciprofloxacin|C0008809|||1|0.0018|  
CF|circumflex|C1880089|||1|  
CF|cisplatin/fluorouracil|||C0280055|PDQ|||  
CF|cisplatin/fluorouracil protocol|C0280055|||C0280055|MTH|||  
CF|citrovorum  
factor|C0023413;C0731033|||C0023413;C0731033|CHV;MSH;NCI;NDFRT;PDQ;SNOMEDCT|||1  
CF|clavicular fracture|C0159658|||1|  
CF|climbing fiber|C2752551|||1|0.0076|1  
CF|climbing fibre|C2752551|||1|0.0016|  
CF|clofibrate|C0009002|||1|0.0024|  
CF|clotting factor|C0005789|||C0005789|CHV;CSP;NCI|||1  
CF|clubfoot|C0009081;C0158489|||1|  
CF|coelomic fluid|||1|0.0014|  
CF|colicin factor|C1257900|||C1257900|MSH;SNOMEDCT|||1  
CF|collected fluid|||1|  
CF|colonization factor|||1|  
CF|colony formation|||1|0.0008|  
CF|colony-forming|||1|  
CF|color and form|||1|  
CF|colostrum-fed|||1|0.0013|  
CF|common femoral|||1|  
CF|compare|C1707455|||1|  
CF|complement factor|C0920104;C1305959|||1|  
CF|complement  
fixation|C0301911;C1551400|||C0301911;C1551400|CHV;HL7V3.0;SNOMEDCT|1|0.068|1  
CF|complement fixation test|C0009541|||1|0.0034|  
CF|complement fixing|||1|  
CF|complement-fixing|||1|0.0181|  
CF|complementary feeding|C0038847|||1|  
CF|completely follicular|||1|  
CF|complex fixation|||1|  
CF|computed fluoroscopy|||1|  
CF|congo|C0009738|||C0009738|CHV|||  
CF|constant frequency|||1|  
CF|constant-frequency|||1|0.0017|  
CF|continuous-flow|||1|0.0022|  
CF|contractile force|||1|0.0053|1  
CF|conventional fractionation|||1|0.0029|  
CF|coronary flow|||1|0.0273|1  
CF|correction factor|||1|  
CF|cortical fibroblasts|||1|0.0013|  
CF|cough fracture|C0567413|||1|  
CF|cough frequency|||1|  
CF|count fingers|||1|  
CF|counting fingers|||1|0.0007|  
CF|coupling factor|||1|

CF|crude fibre|C2348013|||||1|0.002|  
CF|culture filtrate|||||1|0.0062|  
CF|cyclling fibroblast|||||1|  
CF|cyclophosphamide/fluorouracil|C0055160|||C0055160|MTH;PDQ|||  
CF|cystic disorder fibrosis|C0010674|||C0010674|CHV|||  
CF|cystic fibrosi|||C0010674|CHV|||  
CF|cystic  
fibrosis|C0010674|1|0.998|C0010674|AOD;CCS;CHV;COSTAR;CSP;DXP;ICD9CM;LCH;LNC;MED  
LINEPLUS;MSH;MTH;NCI;NDFRT;OMIM;SNOMEDCT|1|0.727|1  
CF|cystic fibrosis (CF)|C0010674|||C0010674|CHV|||  
CF|cystic fibrosis pancreas|C0010674;C1527396|||C0010674|CHV|||  
CF|cystic fibrosys|||C0010674|CHV|||  
CF|cystics fibrosis|||C0010674|CHV|||  
CF|cytosolic fraction|||||1|0.0008|  
CF|cytotoxic factor|||||1|0.0055|  
CF|disease fibrocystic|||C0010674|CHV|||  
CF|disease fibrocystic pancreas|C0010674;C1527396|||C0010674|CHV|||  
CF|diseases fibrocystic|||C0010674|CHV|||  
CF|fibrocystic disease|C0010674;C0016033;C0016034|||C0010674|CHV|||  
CF|fibrocystic disease of pancreas|C0010674;C1527396|||C0010674|CHV|||  
CF|fluorouracil cyclophosphamide|C0055160|||C0055160|CHV|||  
CF|folinate calcium|C0731033|||C0731033|PDQ|||  
CF|folinic acid|C0023413|||||1|0.0012|  
CF|function|C0031843;C0542341;C0700205;C1705273|||||1|0.0018|  
CF|leucovorin|C0023413|||||1|0.0013|  
CF|leucovorin calcium|C0731033|||C0731033|CHV;NCI;PDQ|||  
CF|mucoviscidose|||C0010674|CHV|||  
CF|mucoviscidosi|||C0010674|CHV|||  
CF|mucoviscidosis|C0010674|||C0010674|AOD;CHV;CSP|||  
CF|mucoviscidosys|||C0010674|CHV|||  
CF|pancreas cystic fibrosis|C0010674|||C0010674|CHV|||  
CHF|CARDIAC FAILURE CONGESTIVE|||C0018802|CST|||  
CHF|CCF - Congestive cardiac failure|C0018802|||C0018802|SNOMEDCT|||  
CHF|CHF|C0018802|||C0018802|CHV;CSP;DXP;MEDLINEPLUS;PDQ|||  
CHF|CHF - Congestive heart failure|C0018802|||C0018802|SNOMEDCT|||  
CHF|CHF NOS|C0018802|||C0018802|ICD9CM|||  
CHF|CONGESTIVE HEART FAILURE|C0018802|||C0018802|COSTAR;CST;DXP;NCI|||  
CHF|Cardiac Failure|C0018801;C0018802|||C0018802|NDFRT|||  
CHF|Cardiac Failure Congestive|||C0018802|NCI|||  
CHF|Congenital hepatic fibrosis|C0009714|||||1|0.0071|  
CHF|Congestive Heart Failure|C0018802|||C0018802|MEDLINEPLUS;MSH;NCI|||  
CHF|Congestive cardiac fail|||C0018802|SNOMEDCT|||  
CHF|Congestive cardiac failure|C0018802|||C0018802|SNOMEDCT|||  
CHF|Congestive heart disease|C0018802|||C0018802|MTHICD9;SNOMEDCT|||  
CHF|Congestive heart  
failure|C0018802|||C0018802|AIR;CCS;LCH;LNC;MTH;OMIM;SNOMEDCT|||  
CHF|Congestive heart failure (disorder)|||C0018802|SNOMEDCT|||  
CHF|Congestive heart failure, unspecified|C0018802|||C0018802|ICD9CM|||  
CHF|Congetive cardiac failure|||C0018802|SNOMEDCT|||  
CHF|Crimean Haemorrhagic Fever|C0019099|||||1|0.0016|  
CHF|Crimean hemorrhagic fever|C0019099|||||1|0.0019|1  
CHF|FAILURE HEART CONGESTIVE|||C0018802|CST|||  
CHF|FAILURE, CONGESTIVE HEART|C0018802|||C0018802|NCI|||  
CHF|HEART FAILURE, CONGESTIVE|C0018802|||C0018802|DXP;NCI|||  
CHF|Heart Failure|C0018801;C0018802|||C0018802|NDFRT|||  
CHF|Heart Failure [Disease/Finding]|||C0018802|NDFRT|||  
CHF|Heart Failure, Congestive|C0018802|||C0018802|MSH|||

CHF|cardiac congestive failure|C0018802|||C0018802|CHV|||  
CHF|cardiac failure congestive|||C0018802|CHV|||  
CHF|ccf|C0009081;C0018802|||C0018802|CHV|||  
CHF|chick embryo fibroblast|||1  
CHF|chronic heart failure|C0264716|||1  
CHF|congenital hepatic fibrosis|C0009714|||1  
CHF|congestive cardiac failure|C0018802|||C0018802|CHV|||  
CHF|congestive disease heart|C0018802|||C0018802|CHV|||  
CHF|congestive diseases heart|C0018802|||C0018802|CHV|||  
CHF|congestive failure heart|C0018802|||C0018802|CHV|||  
CHF|congestive failure hearts|C0018802|||C0018802|CHV|||  
CHF|congestive failures heart|C0018802|||C0018802|CHV|||  
CHF|congestive heart disease|C0018802|||C0018802|CHV|||  
CHF|congestive heart  
failure|C0018802|1|1.000|C0018802|AIR;AOD;CCS;CHV;COSTAR;CSP;CST;DXP;LCH;LNC;MED  
LINEPLUS;MSH;MTH;NCI;OMIM;PDQ;SNOMEDCT|1|0.891|1  
CHF|congestive heart failure (CHF)|C0018802|||C0018802|CHV|||  
CHF|congestive heart failure chf|C0018802|||C0018802|CHV|||  
CHF|continuous hemofiltration|C0472683|||1|0.006|  
CHF|disease congestive heart|C0018802|||C0018802|CHV|||  
CHF|failure congestive heart|C0018802|||C0018802|CHV|||  
CHF|heart congestive failure|C0018802|||C0018802|CHV|||  
CHF|heart failure congestive|||C0018802|CHV|||  
CHF|patients with chronic heart failure|||1|0.0925|  
CHOP|ACOP|C0055598;C0163868|||C0055598;C0163868|NCI;PDQ|||  
CHOP|C EBP Homologous Protein|C0287750;C1413947|||C0287750|MSH|||  
CHOP|C-EBP Homologous Protein|C0287750;C1413947|||C0287750|MSH;NDFRT|||  
CHOP|C/EBP Zeta Gene|C2985165|||C2985165|NCI|||  
CHOP|C/EBP homologous protein|C0287750;C1413947|||1|0.3673|  
CHOP|C/EBP zeta|C1413947|||C1413947|HUGO|||  
CHOP|C/EBP-HOMOLOGOUS PROTEIN|C0287750;C1413947|||C1413947|OMIM|||  
CHOP|C/EBP-Homologous Protein|C0287750;C1413947|||C0287750|NCI|||  
CHOP|C/EBP-Homologous Protein 10|C0287750|||C0287750|NCI|||  
CHOP|CAVP|C0055598;C0108844;C0163868|||C0055598;C0163868|NCI;PDQ|||  
CHOP|CEBPZ|C1428360;C2985165|||C2985165|NCI|||  
CHOP|CHOP|C0163868;C0287750;C2945739;C2985165|||C0055598;C0163868;C0287750;C1413  
947;C2985165|HUGO;NCI;OMIM;PDQ|||  
CHOP|CHOP Regimen|C0163868|||C0163868|NCI|||  
CHOP|CHOP chemotherapy protocol|C0055598|||C0055598|CHV|||  
CHOP|CHOP protocol|C0055598|||C0055598|MSH|||  
CHOP|CHOP protocol-  
cyclophosphamide/doxorubicin/prednisone/vincristine|C0055598|||C0055598|MTH|||  
CHOP|CHOP regimen|C0163868|||C0163868|MSH;MTH;NCI|||  
CHOP|CHOP, Transcription Factor|C0287750|||C0287750|MSH|||  
CHOP|CHOP-10|C0287750;C2985165|||C0287750;C2985165|NCI|||  
CHOP|CHOP10|C1413947;C2985165|||C1413947;C2985165|HUGO;NCI|||  
CHOP|COPA|C0055598;C0163868;C1413605|||C0055598;C0163868|NCI;PDQ|||  
CHOP|CTX/DOX/PRED/VCR|||C0055598;C0163868|NCI;PDQ|||  
CHOP|Chop (action)|C2945739|||C2945739|MTH|||  
CHOP|Cyclophosphamide-Hydroxydaunorubicin-Oncovin-Prednisone  
Regimen|C0163868|||C0163868|NCI|||  
CHOP|Cyclophosphamide/Doxorubicin/Prednisone/Vincristine|||C0163868|NCI|||  
CHOP|DDIT-3|C0287750|||C0287750|NCI|||  
CHOP|DDIT3|C1413947|||C1413947|HUGO;LNC;NCI;OMIM|||  
CHOP|DDIT3 Gene|C1413947|||C1413947|NCI|||  
CHOP|DDIT3 Protein|C0287750|||C0287750|MSH;NDFRT|||  
CHOP|DDIT3 gene|C1413947|||C1413947|HUGO;MTH|||

CHOP|DDIT3 wt Allele|C2985165|||C2985165|MTH;NCI|||  
CHOP|DNA DAMAGE-INDUCIBLE TRANSCRIPT 3|C1413947|||C1413947|OMIM|||  
CHOP|DNA Damage Inducible Transcript 3 Protein|C0287750|||C0287750|MSH|||  
CHOP|DNA Damage-Inducible Transcript 3  
Protein|C0287750|||C0287750|MSH;NCI;NDFRT|||  
CHOP|DNA-Damage-Inducible Transcript 3 Gene|C1413947|||C1413947|NCI|||  
CHOP|DNA-Damage-Inducible Transcript 3 wt Allele|C2985165|||C2985165|NCI|||  
CHOP|DNA-damage-inducible transcript 3|C1413947|||C1413947|HUGO|||  
CHOP|GADD153|C1413947;C2985165|||C1413947;C2985165|HUGO;NCI;OMIM|||  
CHOP|GADD153 Protein|C0287750|||C0287750|MSH;NDFRT|||  
CHOP|GROWTH ARREST- AND DNA DAMAGE-INDUCIBLE GENE GADD153|||C1413947|OMIM|||  
CHOP|Growth Arrest And DNA Damage Inducible Protein 153|||C0287750|MSH|||  
CHOP|Growth Arrest And DNA Damage-Inducible Protein 153|||C0287750|MSH;NDFRT|||  
CHOP|Growth Arrest and DNA Damage-Inducible Protein GADD153|||C0287750|NCI|||  
CHOP|Growth Arrest- and DNA Damage-Inducible Gene|||C2985165|NCI|||  
CHOP|Homologous Protein, C-EBP|C0287750;C1413947|||C0287750|MSH|||  
CHOP|MGC4154|C2985165|||C2985165|NCI|||  
CHOP|Transcription Factor CHOP|C0287750|||C0287750|MSH;MTH;NDFRT|||  
CHOP|Transcription Factor CHOP [Chemical/Ingredient]|||C0287750|NDFRT|||  
CHOP|VACP|C0163868|||C0055598;C0163868|NCI;PDQ|||  
CHOP|VCAP|C0055598;C0163868|||C0055598;C0163868|NCI;PDQ|||  
CHOP|chop|C0163868;C0287750;C2945739;C2985165|||C2945739|CHV|||  
CHOP|chopping|C2945739|||C2945739|CHV|||  
CHOP|chops|C2945739|||C2945739|CHV|||  
CHOP|cyclophosphamide, doxorubicin (hydroxydaunorubicin), vincristine (oncovin),  
prednisone||1|1.000|||  
CHOP|cyclophosphamide, doxorubicin, prednisone, and vincristine  
protocol|||C0055598|CHV|||  
CHOP|cyclophosphamide/doxorubicin/prednisone/vincristine|||C0055598|PDQ|||  
CHOP|cyclophosphamide/doxorubicin/vincristine/prednisone|||1|0.2245|  
CHOP|phosphorylcholine|C0031716|||1|0.4082|  
CIC|CAPICUA, DROSOPHILA, HOMOLOG OF|||C1422489|OMIM|||  
CIC|CHVP|C0055670|||C0055670|NCI;PDQ|||  
CIC|CHVP protocol|C0055670|||C0055670|MSH|||  
CIC|CIC|C0055670;C1422489|||C1422489|HUGO;OMIM|||  
CIC|CIC gene|C1422489|||C1422489|HUGO;MTH|||  
CIC|CICS|C0055670;C1621392|||C0055670|PDQ|||  
CIC|CTX/DOX/PRED/VM-26|||C0055670|NCI;PDQ|||  
CIC|Cyclophosphamide/Doxorubicin/Prednisone/Teniposide|||C0055670|NCI|||  
CIC|KIAA0306|C1422489|||C1422489|HUGO;OMIM|||  
CIC|capicua homolog (Drosophila)|||C1422489|HUGO|||  
CIC|carbachol inhalation challenge|||1|  
CIC|cardiac intensive care unit/CICU||1|1.000|||  
CIC|cardioinhibitor center|||1|  
CIC|central nucleus of the inferior colliculus|||1|0.0072|  
CIC|chronic inactive cirrhosis|||1|  
CIC|cic|C0055670;C1422489|||C0055670|CHV|||  
CIC|cicletanine|C0056686|||1|0.0134|  
CIC|cics|C0055670;C1621392|||C0055670|CHV|||  
CIC|circulating immune complex|||1|  
CIC|circulating immune complexes|C0003313|||C0003313|OMIM|1|0.816|  
CIC|clean intermittent catheterisation|||1|0.0206|  
CIC|clean intermittent catheterization|||1|0.0987|1|  
CIC|clean intermittent self-catheterization|||1|0.0072|  
CIC|completely in the canal|||1|  
CIC|complex instability of carpus|||1|  
CIC|conjunctival impression cytology|||1|0.037|

CIC|constant initial concentration|||||1  
CIC|crisis intervention center|||||1  
CIC|cyclophosphamide/doxorubicin/prednisone/teniposide|||C0055670|PDQ||  
CIC|cyclophosphamide/doxorubicin/prednisone/teniposide  
protocol|C0055670||C0055670|MTH||  
CK|ATP Choline Transphosphatase|C0008415||C0008415|MSH;NDFRT||  
CK|ATP:choline phosphotransferase|||C0008415|MSH;NDFRT||  
CK|BB-CK|C1150462||C1150462|GO||  
CK|CC|||C0009212|NCI||  
CK|CCK|||C0009212|NCI||  
CK|CHETK-Alpha|C0008415||C0008415|NCI||  
CK|CHETK-Alpha Gene|C1706600||C1706600|NCI||  
CK|CHK|||C0008415;C1706600|NCI||  
CK|CHK Protein|C0008415||C0008415|NCI||  
CK|CHKA wt Allele|C1706600||C1706600|MTH;NCI||  
CK|CHOK|C0008415;C1706600||C0008415;C1706600|NCI||  
CK|CK|C2985360||C0008415;C0009212;C0009956;C0201973;C1150462;C1706600;C2985360|GO;NCI||  
CK|CK - Creatine kinase level|C0750863||C0201973|SNOMEDCT||  
CK|CK measurement|C0201973||C0201973|SNOMEDCT||  
CK|CK-BB|C0010289;C1150462||C1150462|GO||  
CK|CK-MB|C0010290||C1150462|GO||  
CK|CK-MM|C0010291;C1150462||C1150462|GO||  
CK|CKI|||C0008415;C1706600|NCI||  
CK|CKI, Yeast, Human Complement of|||C0008415|NCI||  
CK|CKMiMi|C1150462||C1150462|GO||  
CK|COCOS (KEELING) ISLANDS|||C0009212|NCI||  
CK|COK|C0009956||C0009956|NCI||  
CK|COOK ISLANDS|C0009956||C0009956|NCI||  
CK|CPK measurement|C0201973||C0201973|SNOMEDCT||  
CK|CW|||C0009956|NCI||  
CK|Centesimal Korsakovian Series of Attenuation|C2985360||C2985360|MTH;NCI||  
CK|Choline Kinase|C0008415||C0008415|MSH;MTH;NCI;NDFRT||  
CK|Choline Kinase Alpha wt Allele|C1706600||C1706600|NCI||  
CK|Choline Kinase Gene|C1706600||C1706600|NCI||  
CK|Choline Kinase [Chemical/Ingredient]|||C0008415|NDFRT||  
CK|Choline Phosphokinase|C0008415||C0008415|MSH;NDFRT||  
CK|Choline Transphosphatase, ATP|C0008415||C0008415|MSH||  
CK|Choline kinase|C0008415||C0008415|SNOMEDCT||  
CK|Choline kinase (substance)|||C0008415|SNOMEDCT||  
CK|Cocos (Keeling) Islands|||C0009212|MSH;MTH;NCI||  
CK|Conductive keratoplasty|C1301494|||1|0.0054|  
CK|Cook Islands|C0009956||C0009956|MSH;MTH;NCI||  
CK|Creatine (phospho)kinase (& level)|||C0201973|SNOMEDCT||  
CK|Creatine (phospho)kinase (& level) (procedure)|||C0201973|SNOMEDCT||  
CK|Creatine Kinase|C0010287||C0201973|NCI||  
CK|Creatine Kinase Measurement|C0201973||C0201973|NCI||  
CK|Creatine kinase level|C0750863||C0201973|SNOMEDCT||  
CK|Creatine kinase measurement|C0201973||C0201973|MTH;SNOMEDCT||  
CK|Creatine kinase measurement (procedure)|||C0201973|SNOMEDCT||  
CK|Creatine phosphokinase measurement|C0201973||C0201973|SNOMEDCT||  
CK|EC 2.7.1.32|||C0008415|NCI||  
CK|HOMEOPATHIC POTENCY OF CENTESIMAL KORSAKOVIAN  
SERIES|C2985360||C2985360|NCI||  
CK|Kinase, Choline|C0008415||C0008415|MSH||  
CK|MB-CK|C1150462||C1150462|GO||  
CK|MM-CK|C1150462||C1150462|GO||

CK|Mi-CK|C1150462|||C1150462|GO|||  
CK|NATO code for cyanogen chloride|||||||1  
CK|Phosphokinase, Choline|C0008415|||C0008415|MSH|||  
CK|Serum creatine-kinase|||||1|0.003|  
CK|Transphosphatase, ATP Choline|C0008415|||C0008415|MSH|||  
CK|anti-cytokeratin|||||1|0.0033|  
CK|calf kidney|||||||1  
CK|casein kinases|C0054846|||||1|0.0018|  
CK|check|C1283174;C1555524|||||||1  
CK|checked|C1283174|||||||1  
CK|chick kidney|||||1|0.0033|  
CK|chicken kidney|||||1|0.0033|1  
CK|cholecystokinin|C0008328;C0523565;C1413167|||C0008328;C0523565;C1413167|AOD;C  
HV;CSP;FMA;HUGO;LCH;LNC;MSH;MTH;NCI;NDFRT;OMIM;RXNORM;SNOMEDCT|||1  
CK|choline kinase|C0008415|||C0008415|MSH;MTH;NCI;NDFRT;SNOMEDCT|||1  
CK|color kinesis|||||1|0.0042|1  
CK|compound K|C0675992|||||1|0.0015|  
CK|conductive keratoplasty|C1301494|||||||1  
CK|contralateral knee|||||||1  
CK|cook island|C0009956|||C0009956|CHV|||  
CK|cook islands|C0009956|||C0009956|CHV|||  
CK|creatine  
kinase|C0010287|1|0.998|C0010287;C0201973|AOD;CHV;CSP;LCH;LNC;MSH;MTH;NCI;NDFRT;  
SNOMEDCT|1|0.7733|1  
CK|creatine kinase (CK) level test|||C0201973|CHV|||  
CK|creatine kinase activity|C1150462|||C1150462|GO;MTH|1|0.0105|  
CK|creatine phosphokinase|C0010287|||||1|0.0311|  
CK|creatinkinase|C0010287|||||1|0.0036|  
CK|cyanogen chloride|C0056659|||||||1  
CK|cytokeratin|C0010803;C0022564|||||1|0.1517|1  
CK|cytokinin|C0010815|||C0010815|CHV;CSP|||  
CK|expression of cytokeratins|||||1|0.0042|  
CK|{kp\_C}|C2985360|||C2985360|NCI|||  
CLL|B Cell CLL|C0023434|||C0023434|NCI|||  
CLL|B Cell Chronic Lymphocytic Leukemia|C0023434;C1868683|||C0023434|MSH;NCI|||  
CLL|B Cell Leukemia, Chronic|C0023434|||C0023434|MSH|||  
CLL|B Cell Lymphocytic Leukemia|C0023434;C2004493|||C0023434|NCI|||  
CLL|B Lymphocytic Leukemia, Chronic|C0023434|||C0023434|MSH|||  
CLL|B cell chronic lymphocytic leukemia|C0023434;C1868683|||C0023434|PDQ|||  
CLL|B-CLL - B-cell chronic lymphocytic leukaemia|C0023434|||C0023434|SNOMEDCT|||  
CLL|B-CLL - B-cell chronic lymphocytic leukemia|C0023434|||C0023434|SNOMEDCT|||  
CLL|B-Cell CLL|C0023434|||C0023434|NCI|||  
CLL|B-Cell Chronic Lymphocytic  
Leukemia|C0023434;C1868683|||C0023434|MSH;NCI;NDFRT|||  
CLL|B-Cell Chronic Lymphogenous Leukemia|C0023434|||C0023434|NCI|||  
CLL|B-Cell Chronic Lymphoid Leukemia|C0023434|||C0023434|NCI|||  
CLL|B-Cell Leukemia|C0023434;C2004493|||C0023434|NCI|||  
CLL|B-Cell Leukemia, Chronic|C0023434|||C0023434|MSH;NDFRT|||  
CLL|B-Cell Leukemias, Chronic|C0023434|||C0023434|MSH|||  
CLL|B-Cell Lymphocytic Leukemia|C0023434;C2004493|||C0023434|NCI|||  
CLL|B-Lymphocytic Leukemia|C2004493|||C0023434|NCI|||  
CLL|B-Lymphocytic Leukemia, Chronic|C0023434|||C0023434|MSH;NDFRT|||  
CLL|B-Lymphocytic Leukemias, Chronic|C0023434|||C0023434|MSH|||  
CLL|B-cell CLL|C0023434|||C0023434|PDQ|||  
CLL|B-cell chronic lymphocytic  
leukaemia|C0023434;C1868683|||C0023434|SNOMEDCT|||

CLL|B-cell chronic lymphocytic leukaemia/small lymphocytic lymphoma|||C0023434|SNOMEDCT|||  
CLL|B-cell chronic lymphocytic leukemia|C0023434;C1868683|||C0023434|PDQ;SNOMEDCT|||  
CLL|B-cell chronic lymphocytic leukemia (disorder)|||C0023434|SNOMEDCT|||  
CLL|B-cell chronic lymphocytic leukemia/small lymphocytic lymphoma|||C0023434|SNOMEDCT|||  
CLL|B-cell chronic lymphocytic leukemia/small lymphocytic lymphoma (morphologic abnormality)|||C0023434|SNOMEDCT|||  
CLL|BCLL|C0023434;C1868683|||C0023434|NCI|||  
CLL|CHRONIC LYMPHOCYTIC LEUKEMIA|C0023434|||C0023434|COSTAR;CST|||  
CLL|CLL|C0023434|||C0023434|CSP;DXP;LNC;MEDLINEPLUS;NCI;OMIM;PDQ|||  
CLL|CLL - Chronic lymphocytic leukaemia|C0023434|||C0023434|SNOMEDCT|||  
CLL|CLL - Chronic lymphocytic leukemia|C0023434|||C0023434|SNOMEDCT|||  
CLL|CLL Lymphoplasmacytoid Lymphoma|C0023434|||C0023434|MSH|||  
CLL|CLL Lymphoplasmacytoid Lymphomas|C0023434|||C0023434|MSH|||  
CLL|CLL, B-cell|C0023434|||C0023434|PDQ|||  
CLL|Chronic B-Cell Leukemia|C0023434|||C0023434|MSH|||  
CLL|Chronic B-Cell Leukemias|C0023434|||C0023434|MSH|||  
CLL|Chronic B-Cell Lymphocytic Leukemia|C0023434|||C0023434|NCI|||  
CLL|Chronic B-Lymphocytic Leukemia|C0023434|||C0023434|MSH|||  
CLL|Chronic B-Lymphocytic Leukemias|C0023434|||C0023434|MSH|||  
CLL|Chronic Lymphatic Leukemia|C0023434|||C0023434|NCI|||  
CLL|Chronic Lymphoblastic Leukemia|C0023434|||C0023434|MSH|||  
CLL|Chronic Lymphoblastic Leukemias|C0023434|||C0023434|MSH|||  
CLL|Chronic Lymphocytic Leukemia|C0023434|||C0023434|MEDLINEPLUS;MSH;MTH;NCI;NDFRT|||  
CLL|Chronic Lymphocytic Leukemias|C0023434|||C0023434|MSH|||  
CLL|Chronic Lymphogenous Leukemia|C0023434|||C0023434|NCI|||  
CLL|Chronic lymphatic leukaemia|C0023434|||C0023434|SNOMEDCT|||  
CLL|Chronic lymphatic leukemia|C0023434|||C0023434|OMIM;SNOMEDCT|||  
CLL|Chronic lymphocytic leukaemia|C0023434|||C0023434|SNOMEDCT|||  
CLL|Chronic lymphocytic leukaemia, B-cell type|C0023434|||C0023434|SNOMEDCT|||  
CLL|Chronic lymphocytic leukemia|C0023434|||C0023434|SNOMEDCT|||  
CLL|Chronic lymphocytic leukemia, B-cell type|C0023434|||C0023434|SNOMEDCT|||  
CLL|Chronic lymphocytic leukemia, morphology (morphologic abnormality)|||C0023434|SNOMEDCT|||  
CLL|Chronic lymphoid leukaemia|C0023434|||C0023434|SNOMEDCT|||  
CLL|Chronic lymphoid leukaemia, disease|C0023434|||C0023434|SNOMEDCT|||  
CLL|Chronic lymphoid leukemia|C0023434|||C0023434|SNOMEDCT|||  
CLL|Chronic lymphoid leukemia, disease|C0023434|||C0023434|SNOMEDCT|||  
CLL|Chronic lymphoid leukemia, disease (disorder)|||C0023434|SNOMEDCT|||  
CLL|DIFFUSE WELL DIFFER LYMPHOCYTIC LYMPHOMA|||C0023434|MSH|||  
CLL|Diffuse Well Differentiated Lymphocytic Lymphoma|||C0023434|MSH|||  
CLL|Diffuse Well-Differentiated Lymphocytic Lymphoma|||C0023434|MSH;NDFRT|||  
CLL|Hematopoietic - Chronic Lymphocytic Leukemia (CLL)|||C0023434|NCI|||  
CLL|LEUKEMIA CHRONIC LYMPHOCYTIC|C0023434|||C0023434|QMR|||  
CLL|LEUKEMIA LYMPHOCYTIC CHRONIC|C0023434|||C0023434|CST|||  
CLL|LEUKEMIA, CHRONIC LYMPHATIC|C0023434|||C0023434|OMIM|||  
CLL|LEUKEMIA, CHRONIC LYMPHOCYTIC|C0023434|||C0023434|OMIM|||  
CLL|LEUKEMIA, LYMPHOCYTIC, CHRONIC|C0023434|||C0023434|DXP|||  
CLL|LYMPHOCYTIC LEUKEMIA CHRONIC B|C0023434|||C0023434|MSH|||  
CLL|LYMPHOCYTIC LYMPHOMA DIFFUSE WELL DIFFER|||C0023434|MSH|||  
CLL|LYMPHOCYTIC LYMPHOMA WELL DIFFER|||C0023434|MSH|||  
CLL|LYMPHOMA LYMPHOCYTIC DIFFUSE WELL DIFFER|||C0023434|MSH|||  
CLL|LYMPHOMA LYMPHOCYTIC WELL DIFFER|||C0023434|MSH|||  
CLL|LYMPHOMA SMALL|||C0023434|MSH|||

CLL|Leukemia, B Cell, Chronic|C0023434|||C0023434|MSH;NDFRT|||  
CLL|Leukemia, B-Cell, Chronic|C0023434|||C0023434|MSH;NDFRT|||  
CLL|Leukemia, Chronic B-Cell|C0023434|||C0023434|MSH|||  
CLL|Leukemia, Chronic B-Lymphocytic|C0023434|||C0023434|MSH|||  
CLL|Leukemia, Chronic Lymphoblastic|C0023434|||C0023434|MSH|||  
CLL|Leukemia, Chronic Lymphocytic|C0023434|||C0023434|MEDLINEPLUS;MSH|||  
CLL|Leukemia, Lymphoblastic, Chronic|C0023434|||C0023434|MSH;NDFRT|||  
CLL|Leukemia, Lymphocytic, Chronic|C0023434|||C0023434|MSH;NDFRT|||  
CLL|Leukemia, Lymphocytic, Chronic, B  
Cell|C0023434;C1868683|||C0023434|MSH;NDFRT|||  
CLL|Leukemia, Lymphocytic, Chronic, B-  
Cell|C0023434;C1868683|||C0023434|MSH;NDFRT|||  
CLL|Leukemia, Lymphocytic, Chronic, B-Cell  
[Disease/Finding]|||C0023434|NDFRT|||  
CLL|Leukemia, chronic lymphocytic (CLL)|||C0023434|PDQ|||  
CLL|Leukemias, Chronic B-Cell|C0023434|||C0023434|MSH|||  
CLL|Leukemias, Chronic B-Lymphocytic|C0023434|||C0023434|MSH|||  
CLL|Leukemias, Chronic Lymphoblastic|C0023434|||C0023434|MSH|||  
CLL|Leukemias, Chronic Lymphocytic|C0023434|||C0023434|MSH|||  
CLL|Lymphoblastic Leukemia, Chronic|C0023434|||C0023434|MSH;NDFRT|||  
CLL|Lymphoblastic Leukemias, Chronic|C0023434|||C0023434|MSH|||  
CLL|Lymphocytic Leukemia, Chronic|C0023434|||C0023434|MSH;NDFRT|||  
CLL|Lymphocytic Leukemia, Chronic, B  
Cell|C0023434;C1868683|||C0023434|MSH;NDFRT|||  
CLL|Lymphocytic Leukemia, Chronic, B-  
Cell|C0023434;C1868683|||C0023434|MSH;NDFRT|||  
CLL|Lymphocytic Leukemias, Chronic|C0023434|||C0023434|MSH|||  
CLL|Lymphocytic Lymphoma|C0023434;C0024303;C0855095|||C0023434|MSH;NDFRT|||  
CLL|Lymphocytic Lymphoma, Diffuse, Well Differentiated|||C0023434|MSH;NDFRT|||  
CLL|Lymphocytic Lymphoma, Diffuse, Well-Differentiated|||C0023434|MSH;NDFRT|||  
CLL|Lymphocytic Lymphoma, Small|C0023434;C0855095|||C0023434|MSH|||  
CLL|Lymphocytic Lymphoma, Well  
Differentiated|C0023434;C0855095|||C0023434|MSH;NDFRT|||  
CLL|Lymphocytic Lymphoma, Well-  
Differentiated|C0023434;C0855095|||C0023434|MSH;NDFRT|||  
CLL|Lymphocytic Lymphomas|C0023434|||C0023434|MSH|||  
CLL|Lymphocytic Lymphomas, Small|C0023434|||C0023434|MSH|||  
CLL|Lymphocytic Lymphomas, Well-Differentiated|C0023434|||C0023434|MSH|||  
CLL|Lymphocytic lymphoma|C0023434;C0024303;C0855095|||C0023434|OMIM|||  
CLL|Lymphoid leukemia, chronic|C0023434|||C0023434|ICD9CM|||  
CLL|Lymphoma, CLL Lymphoplasmacytoid|C0023434|||C0023434|MSH|||  
CLL|Lymphoma, Lymphocytic|C0023434;C0024303;C0855095|||C0023434|MSH;NDFRT|||  
CLL|Lymphoma, Lymphocytic, Diffuse, Well Differentiated|||C0023434|MSH;NDFRT|||  
CLL|Lymphoma, Lymphocytic, Diffuse, Well-Differentiated|||C0023434|MSH;NDFRT|||  
CLL|Lymphoma, Lymphocytic, Well  
Differentiated|C0023434;C0855095|||C0023434|MSH;NDFRT|||  
CLL|Lymphoma, Lymphocytic, Well-  
Differentiated|C0023434;C0855095|||C0023434|MSH;NDFRT|||  
CLL|Lymphoma, Lymphoplasmacytoid, CLL|C0023434|||C0023434|MSH;NDFRT|||  
CLL|Lymphoma, Small Cell|C0023434;C0024303|||C0023434|MSH|||  
CLL|Lymphoma, Small Lymphocytic|C0023434;C0855095|||C0023434|MSH;NDFRT|||  
CLL|Lymphoma, Small Lymphocytic, Plasmacytoid|C0023434|||C0023434|MSH;NDFRT|||  
CLL|Lymphoma, Small-Cell|C0023434;C0024303|||C0023434|MSH;NDFRT|||  
CLL|Lymphoma, Well-Differentiated  
Lymphocytic|C0023434;C0855095|||C0023434|MSH|||  
CLL|Lymphomas, CLL Lymphoplasmacytoid|C0023434|||C0023434|MSH|||  
CLL|Lymphomas, Lymphocytic|C0023434|||C0023434|MSH|||

CLL|Lymphomas, Small Lymphocytic|C0023434|||C0023434|MSH|||  
CLL|Lymphomas, Small-Cell|C0023434|||C0023434|MSH|||  
CLL|Lymphomas, Well-Differentiated Lymphocytic|C0023434|||C0023434|MSH|||  
CLL|Lymphoplasmacytoid Lymphoma, CLL|C0023434|||C0023434|MSH;NDFRT|||  
CLL|Lymphoplasmacytoid Lymphomas, CLL|C0023434|||C0023434|MSH|||  
CLL|SMALL LYMPHOMA|||C0023434|MSH|||  
CLL|Small Cell Lymphoma|C0023434;C0024303|||C0023434|MSH|||  
CLL|Small Lymphocytic Lymphoma|C0023434;C0855095|||C0023434|MSH|||  
CLL|Small Lymphocytic Lymphomas|C0023434|||C0023434|MSH|||  
CLL|Small-Cell Lymphoma|C0023434;C0024303|||C0023434|MSH;NDFRT|||  
CLL|Small-Cell Lymphomas|C0023434|||C0023434|MSH|||  
CLL|Well-Differentiated Lymphocytic Lymphoma|C0023434;C0855095|||C0023434|MSH|||  
CLL|Well-Differentiated Lymphocytic Lymphomas|C0023434|||C0023434|MSH|||  
CLL|[M]Chronic lymphoid leukaemia|||C0023434|SNOMEDCT|||  
CLL|[M]Chronic lymphoid leukaemia (disorder)|||C0023434|SNOMEDCT|||  
CLL|[M]Chronic lymphoid leukemia|||C0023434|SNOMEDCT|||  
CLL|b cell leukemia|C0023434;C2004493|||C0023434|CHV|||  
CLL|b cell lymphocytic leukemia|C0023434;C2004493|||C0023434|CHV|||  
CLL|b chronic lymphocytic leukemia|C0023434|||C0023434|CHV|||  
CLL|b-cell cll|C0023434|||C0023434|CHV|||  
CLL|b-cell leukemia|C0023434;C2004493|||C0023434|CHV|||  
CLL|centrocytelike cell|C1516393|||1  
CLL|cholesterol-lowering lipid|||1  
CLL|chronic leukemia lymphocytic|||C0023434|CHV|||  
CLL|chronic lymphatic leukaemia|C0023434|||C0023434|CHV|||  
CLL|chronic lymphatic leukemia|C0023434|||C0023434|CHV;CSP;NCI;OMIM;SNOMEDCT|||  
CLL|chronic lymphoblastic leukemia|C0023434|||C0023434|CHV|||  
CLL|chronic lymphocytic|||1|0.0033|  
CLL|chronic lymphocytic leukaemia|C0023434|||C0023434|CHV|1|0.2244|  
CLL|chronic lymphocytic  
leukemia|C0023434|1|1.000|C0023434|CHV;COSTAR;CSP;CST;MEDLINEPLUS;MSH;MTH;NCI;ND  
FRT;PDQ;SNOMEDCT|1|0.7652|1  
CLL|chronic lymphocytic leukemia (c11)|C0023434|||C0023434|CHV|||  
CLL|chronic lymphocytic leukemia cells|||1|0.0019|  
CLL|chronic lymphocytic leukemia, B-cell|C0023434;C1868683|||C0023434|PDQ|||  
CLL|chronic lymphocytic leukemic|||1|0.0052|  
CLL|chronic lymphogenous leukemia|C0023434|||C0023434|CHV;CSP|||  
CLL|chronic lymphoid leukemia|C0023434|||C0023434|CHV;CSP|||  
CLL|c11|C0023434|||C0023434|CHV|||  
CLL|c11 chronic lymphocytic leukemia|C0023434|||C0023434|CHV|||  
CLL|c11s|C0023434|||C0023434|CHV|||  
CLL|cow lung lavage|||1  
CLL|leukemia b cell|C0023434|||C0023434|CHV|||  
CLL|leukemia chronic lymphocytic|C0023434|||C0023434|CHV|||  
CLL|leukemia, B-cell chronic lymphocytic|C0023434;C1868683|||C0023434|PDQ|||  
CLL|leukemia, chronic lymphocytic|C0023434|||C0023434|PDQ|||  
CLL|lymphocytic leukemia chronic|||C0023434|CHV|||  
CLL|lymphocytic leukemia, B-cell chronic|C0023434;C1868683|||C0023434|PDQ|||  
CLL|lymphocytic leukemia, chronic|C0023434|||C0023434|PDQ|||  
CML|ALL|C0444868|||C0105421;C0812385;C1704799|HUGO;NCI|||  
CML|BCR|||C0105421;C0812385|HUGO;LNC;NCI;OMIM|||  
CML|BCR Gene|C0812385|||C0812385|NCI|||  
CML|BCR Protein|C0105421|||C0105421|NCI|||  
CML|BCR gene|C0812385|||C0812385|HUGO;MTH|||  
CML|BCR protein, human|C0105421|||C0105421|MSH;MTH|||  
CML|BCR wt Allele|C1704799|||C1704799|MTH;NCI|||  
CML|BCR-ABL Positive Chronic Myelogenous Leukemia|C0023473|||C0023473|NCI|||

CML|BCR1||||C0105421;C0812385;C1704799|NCI;OMIM|||  
CML|BREAKPOINT CLUSTER REGION|C0812385|||C0812385|OMIM|||  
CML|Breakpoint Cluster Region Gene|C0812385|||C0812385|NCI|||  
CML|Breakpoint Cluster Region Protein|C0072449;C0105421|||C0105421|NCI|||  
CML|Breakpoint Cluster Region wt Allele|C1704799|||C1704799|NCI|||  
CML|CGL|C0023473|||C0023473|PDQ|||  
CML|CGL - Chronic granulocytic leukaemia|C0023473|||C0023473|SNOMEDCT|||  
CML|CGL - Chronic granulocytic leukemia|C0023473|||C0023473|SNOMEDCT|||  
CML|CHRONIC GRANULOCYTIC LEUKEMIA|C0023473|||C0023473|COSTAR|||  
CML|CHRONIC MYELOCYTIC LEUKEMIA|C0023473|||C0023473|CST|||  
CML|CML|||C0023473;C0105421;C0812385;C1704799|CSP;DXP;HUGO;MEDLINEPLUS;NCI;OMIM  
;PDQ|||  
CML|CML - Chronic Myelogenous Leukemia|C0023473|||C0023473|NCI|||  
CML|CML - Chronic myeloid leukaemia|C0023473|||C0023473|SNOMEDCT|||  
CML|CML - Chronic myeloid leukemia|C0023473|||C0023473|SNOMEDCT|||  
CML|Chronic Granulocytic Leukemia|C0023473|||C0023473|MSH;NCI|||  
CML|Chronic Granulocytic Leukemias|C0023473|||C0023473|MSH|||  
CML|Chronic Myelocytic Leukemia|C0023473|||C0023473|MSH;NCI|||  
CML|Chronic Myelocytic Leukemias|C0023473|||C0023473|MSH|||  
CML|Chronic Myelogenous Leukemia|C0023473|||C0023473|MSH;NCI|||  
CML|Chronic Myelogenous Leukemia, BCR-ABL1 Positive|C0023473|||C0023473|NCI|||  
CML|Chronic Myelogenous Leukemias|C0023473|||C0023473|MSH;NCI|||  
CML|Chronic Myeloid Leukemia|C0023473;C2984277|||C0023473|MEDLINEPLUS;MSH;NCI|||  
CML|Chronic Myeloid Leukemias|C0023473|||C0023473|MSH|||  
CML|Chronic granulocytic leukaemia|C0023473|||C0023473|SNOMEDCT|||  
CML|Chronic granulocytic leukemia|C0023473|||C0023473|MEDLINEPLUS;SNOMEDCT|||  
CML|Chronic myelocytic leukaemia|C0023473|||C0023473|SNOMEDCT|||  
CML|Chronic myelocytic leukemia|C0023473|||C0023473|SNOMEDCT|||  
CML|Chronic myelogenous leukaemia|C0023473|||C0023473|SNOMEDCT|||  
CML|Chronic myelogenous  
leukemia|C0023473|||C0023473|MEDLINEPLUS;OMIM;SNOMEDCT|||  
CML|Chronic myelogenous leukemia (CML)|C0023473|||C0023473|PDQ|||  
CML|Chronic myelogenous leukemia, no ICD-O  
subtype|C0023473|||C0023473|SNOMEDCT|||  
CML|Chronic myelogenous leukemia, no ICD-O subtype (morphologic  
abnormality)|||C0023473|SNOMEDCT|||  
CML|Chronic myeloid leukaemia|C0023473;C2984277|||C0023473|SNOMEDCT|||  
CML|Chronic myeloid leukaemia (disorder)|||C0023473|SNOMEDCT|||  
CML|Chronic myeloid leukaemia NOS|C0023473;C2984277|||C0023473|SNOMEDCT|||  
CML|Chronic myeloid leukaemia, disease|C0023473|||C0023473|SNOMEDCT|||  
CML|Chronic myeloid leukemia|C0023473;C2984277|||C0023473|SNOMEDCT|||  
CML|Chronic myeloid leukemia NOS|C0023473;C2984277|||C0023473|SNOMEDCT|||  
CML|Chronic myeloid leukemia NOS (disorder)|||C0023473|SNOMEDCT|||  
CML|Chronic myeloid leukemia, disease|C0023473|||C0023473|SNOMEDCT|||  
CML|Chronic myeloid leukemia, disease (disorder)|||C0023473|SNOMEDCT|||  
CML|Circular Mil|C1552913|||C1552913|MTH;NCI|||  
CML|D22S11|C0105421;C1704799|||C0105421;C1704799|NCI|||  
CML|D22S662|C0105421;C0812385;C1704799|||C0105421;C0812385;C1704799|HUGO;NCI|||  
CML|Granulocytic Leukemia, Chronic|C0023473|||C0023473|MSH;NDFRT|||  
CML|Granulocytic Leukemias, Chronic|C0023473|||C0023473|MSH|||  
CML|Hematopoeitic - Chronic Myelocytic Leukemia (CML)|||C0023473|NCI|||  
CML|LEUKEMIA CHRONIC MYELOCYTIC|C0023473|||C0023473|QMR|||  
CML|LEUKEMIA MYELOCYTIC CHRONIC|C0023473|||C0023473|CST|||  
CML|LEUKEMIA PHILA POS|||C0023473|MSH|||  
CML|LEUKEMIA, CHRONIC MYELOGENOUS|C0023473|||C0023473|OMIM|||  
CML|LEUKEMIA, CHRONIC MYELOID|C0023473;C2984277|||C0023473|OMIM|||  
CML|LEUKEMIA, GRANULOCYTIC, CHRONIC|C0023473|||C0023473|DXP|||

CML|LEUKEMIA, MYELOCYTIC, CHRONIC|C0023473|||C0023473|DXP|||  
CML|LEUKEMIA, MYELOGENOUS, CHRONIC|C0023473|||C0023473|DXP|||  
CML|LEUKEMIA, MYELOID, CHRONIC|C0023473;C2984277|||C0023473|DXP|||  
CML|Leukemia, Chronic Granulocytic|C0023473|||C0023473|MSH|||  
CML|Leukemia, Chronic Myelocytic|C0023473|||C0023473|MSH|||  
CML|Leukemia, Chronic Myelogenous|C0023473|||C0023473|MSH|||  
CML|Leukemia, Chronic Myeloid|C0023473;C2984277|||C0023473|MSH|||  
CML|Leukemia, Granulocytic, Chronic|C0023473|||C0023473|MSH;NDFRT|||  
CML|Leukemia, Myelocytic, Chronic|C0023473|||C0023473|MSH;NDFRT|||  
CML|Leukemia, Myelogenous, Chronic|C0023473|||C0023473|MSH;NDFRT|||  
CML|Leukemia, Myelogenous, Chronic, BCR-ABL  
Positive|C0023473|||C0023473|MSH;NDFRT|||  
CML|Leukemia, Myelogenous, Chronic, BCR-ABL Positive  
[Disease/Finding]|||C0023473|NDFRT|||  
CML|Leukemia, Myelogenous, Ph1  
Positive|C0023473;C0023476|||C0023473|MSH;NDFRT|||  
CML|Leukemia, Myelogenous, Ph1-  
Positive|C0023473;C0023476|||C0023473|MSH;NDFRT|||  
CML|Leukemia, Myeloid,  
Chronic|C0023473;C2984277|||C0023473|MEDLINEPLUS;MSH;NDFRT|||  
CML|Leukemia, Myeloid, Ph1 Positive|C0023473;C0023476|||C0023473|MSH;NDFRT|||  
CML|Leukemia, Myeloid, Ph1-Positive|C0023473;C0023476|||C0023473|MSH;NDFRT|||  
CML|Leukemia, Myeloid, Philadelphia  
Positive|C0023473;C0023476|||C0023473|MSH;NDFRT|||  
CML|Leukemia, Myeloid, Philadelphia-  
Positive|C0023473;C0023476|||C0023473|MSH;NDFRT|||  
CML|Leukemia, Ph1-Positive Myelogenous|C0023473;C0023476|||C0023473|MSH|||  
CML|Leukemia, Ph1-Positive Myeloid|C0023473;C0023476|||C0023473|MSH|||  
CML|Leukemia, Philadelphia-Positive Myeloid|C0023473;C0023476|||C0023473|MSH|||  
CML|Leukemias, Chronic Granulocytic|C0023473|||C0023473|MSH|||  
CML|Leukemias, Chronic Myelocytic|C0023473|||C0023473|MSH|||  
CML|Leukemias, Chronic Myelogenous|C0023473|||C0023473|MSH|||  
CML|Leukemias, Chronic Myeloid|C0023473|||C0023473|MSH|||  
CML|Leukemias, Ph1-Positive Myelogenous|C0023473|||C0023473|MSH|||  
CML|Leukemias, Ph1-Positive Myeloid|C0023473|||C0023473|MSH|||  
CML|Leukemias, Philadelphia-Positive Myeloid|C0023473|||C0023473|MSH|||  
CML|Myelocytic Leukemia, Chronic|C0023473|||C0023473|MSH;NDFRT|||  
CML|Myelocytic Leukemias, Chronic|C0023473|||C0023473|MSH|||  
CML|Myelogenous Leukemia, Chronic|C0023473|||C0023473|MSH;NDFRT|||  
CML|Myelogenous Leukemia, Ph1 Positive|C0023473;C0023476|||C0023473|MSH|||  
CML|Myelogenous Leukemia, Ph1-Positive|C0023473;C0023476|||C0023473|MSH;NDFRT|||  
CML|Myelogenous Leukemias, Chronic|C0023473|||C0023473|MSH|||  
CML|Myelogenous Leukemias, Ph1-Positive|C0023473|||C0023473|MSH|||  
CML|Myeloid Leukemia, Chronic|C0023473;C2984277|||C0023473|MSH;MTH;NDFRT|||  
CML|Myeloid Leukemia, Ph1 Positive|C0023473;C0023476|||C0023473|MSH|||  
CML|Myeloid Leukemia, Ph1-Positive|C0023473;C0023476|||C0023473|MSH;NDFRT|||  
CML|Myeloid Leukemia, Philadelphia Positive|C0023473;C0023476|||C0023473|MSH|||  
CML|Myeloid Leukemia, Philadelphia-  
Positive|C0023473;C0023476|||C0023473|MSH;NDFRT|||  
CML|Myeloid Leukemias, Chronic|C0023473|||C0023473|MSH|||  
CML|Myeloid Leukemias, Ph1-Positive|C0023473|||C0023473|MSH|||  
CML|Myeloid Leukemias, Philadelphia-Positive|C0023473|||C0023473|MSH|||  
CML|Myeloid leukemia, chronic|C0023473;C2984277|||C0023473|ICD9CM|||  
CML|N epsilon-carboxymethyllysine|||||1|0.0024|  
CML|N(epsilon)-(carboxymethyl)lysine|||||1|0.0171|  
CML|Nepsilon-(Carboxymethyl)lysine|||||1|0.0058|  
CML|PHL|||C0105421;C0812385;C1704799|HUGO;NCI|||

CML|Ph1-Positive Myelogenous Leukemia|C0023473;C0023476|||C0023473|MSH|||  
CML|Ph1-Positive Myelogenous Leukemias|C0023473|||C0023473|MSH|||  
CML|Ph1-Positive Myeloid Leukemia|C0023473;C0023476|||C0023473|MSH|||  
CML|Ph1-Positive Myeloid Leukemias|C0023473|||C0023473|MSH|||  
CML|Philadelphia-Positive Myeloid Leukemia|C0023473;C0023476|||C0023473|MSH|||  
CML|Philadelphia-Positive Myeloid Leukemias|C0023473|||C0023473|MSH|||  
CML|[M]Chronic myeloid leukaemia|||C0023473|SNOMEDCT|||  
CML|[M]Chronic myeloid leukemia|||C0023473|SNOMEDCT|||  
CML|[cml\_i]|C1552913|||C1552913|NCI|||  
CML|bcr gene|C0812385|||C0812385|CHV|||  
CML|breakpoint cluster region|C0812385|||C0812385|HUGO|||  
CML|breakpoint cluster region protein, human|C0105421|||C0105421|MSH|||  
CML|c-bcr protein, human|C0105421|||C0105421|MSH|||  
CML|carboxymethyllysine|C0083528|||C0083528|MSH|1|0.0081|  
CML|cell-mediated lymphocytotoxicity|||1|0.0036|1|  
CML|cell-mediated lympholysis|C0301896|||C0301896|NCI;SNOMEDCT|1|0.039|1|  
CML|cell-mediated lysis|||1|0.0026|1|  
CML|central motor latency|||1|1|  
CML|chronic granulocytic leukaemia|C0023473|||C0023473|CHV|||  
CML|chronic granulocytic leukemia|C0023473|||C0023473|CHV;CSP;NCI;PDQ|||  
CML|chronic myeloblastic leukemia||1|1.000|||1|  
CML|chronic myelocytic  
leukemia|C0023473|||C0023473|CHV;CSP;CST;MSH;NCI;PDQ;SNOMEDCT|||  
CML|chronic myelogenous leukaemia|C0023473|||C0023473|CHV|1|0.0461|  
CML|chronic myelogenous  
leukemia|C0023473|||C0023473|CHV;CSP;MEDLINEPLUS;MSH;NCI;OMIM;PDQ;SNOMEDCT|1|0.4  
111|  
CML|chronic myelogenous leukemia (CML)|C0023473|||C0023473|CHV|||  
CML|chronic myeloid leukaemia|C0023473;C2984277|||C0023473|CHV|1|0.113|  
CML|chronic myeloid leukemia|C0023473;C2984277|||C0023473|CHV;CSP;NCI|1|0.3471|  
CML|chronic myeloid leukemias|C0023473|||C0023473|CHV|||  
CML|chronic myeloid leukemic|||1|0.0024|  
CML|circular mil|C1552913|||C1552913|HL7V3.0;NCI|||  
CML|cml|||C0023473;C1552913|CHV;NCI|||  
CML|count median length|||1|1|  
CML|cross midline|||1|1|  
CML|granulocytic leukemia, chronic|C0023473|||C0023473|PDQ|||  
CML|leukemia, chronic myelogenous|C0023473|||C0023473|PDQ|||  
CML|mediated lysis|||1|0.0017|  
CML|myelocytic leukemia, chronic|C0023473|||C0023473|PDQ|||  
CML|myelogenous leukemia, chronic|C0023473|||C0023473|PDQ|||  
CMP|5'-Cytidylic acid|C0010729|||C0010729|MSH;NDFRT|||  
CMP|Acid, Cytidylic|C0010729|||C0010729|MSH|||  
CMP|Acids, Cytidylic|C0010729|||C0010729|MSH|||  
CMP|C'MP protocol|C0054385|||C0054385|MSH|||  
CMP|CARTILAGE MATRIX PROTEIN|C0054832;C1417041|||C1417041|OMIM|||  
CMP|CCNU/MTX/PCB|||C0054385|NCI;PDQ|||  
CMP|CMP|||C0010729;C0054385;C1417041|MSH;NCI;NDFRT;OMIM;PDQ;SNOMEDCT|||  
CMP|CMP (cytidine monophosphate)|||C0010729|CSP|||  
CMP|CRTM|C1417041|||C1417041|OMIM|||  
CMP|Cartilage matrix protein|C0054832;C1417041|||1|0.1513|  
CMP|Cytidine Monophosphate|C0010729|||C0010729|MSH;MTH;NDFRT|||  
CMP|Cytidine Monophosphate [Chemical/Ingredient]|||C0010729|NDFRT|||  
CMP|Cytidine monophosphate|C0010729|||C0010729|SNOMEDCT|||  
CMP|Cytidylic Acid|C0010729|||C0010729|MSH;NDFRT|||  
CMP|Cytidylic Acids|C0010729|||C0010729|MSH;NDFRT|||  
CMP|Cytidylic acid|C0010729|||C0010729|SNOMEDCT|||

CMP|Cytidylic acid (substance)|||C0010729|SNOMEDCT|||  
CMP|Lomustine/Methotrexate/Procarbazine|||C0054385|NCI|||  
CMP|MATN1|C1417041|||C1417041|HUGO;OMIM|||  
CMP|MATN1 gene|C1417041|||C1417041|HUGO;MTH|||  
CMP|MATRILIN 1|C0054832;C1417041|||C1417041|OMIM|||  
CMP|Monophosphate, Cytidine|C0010729|||C0010729|MSH|||  
CMP|calorie-protein malnutrition|||1  
CMP|captioned media program|||1  
CMP|cardiomyopathy|C0878544|1|0.006|C0878544|AOD;CCS;CHV;COSTAR;CSP;CST;DXP;ICD9  
CM;MEDLINEPLUS;MSH;NCI;OMIM;SNOMEDCT|1|0.3553|1  
CMP|caseinomacropeptide|C0286762|||1|0.0789|  
CMP|cervical mucus penetration|||1  
CMP|chemical mechanical polishing|||1|0.0461|  
CMP|chondromalacia patella|C0008475|||C0008475|CHV|||  
CMP|chondromalacia patellae|C0008475|||1  
CMP|colorimetric microtiter plate|||1  
CMP|competitive medical plans|C0085130|||1  
CMP|complementary medical practice|||1  
CMP|complexity of mental processes|||1  
CMP|comprehensive medical plan|||1  
CMP|comprehensive metabolic panel|C0519825|1|0.990|||1  
CMP|control measurement point|||1  
CMP|cow's milk protein|C0440448|||1|0.1645|1  
CMP|crossmodal priming|||1  
CMP|cushion mouthpiece|||1  
CMP|cyclophosphamide|C0010583|1|0.002|||1  
CMP|cytidine 5'-monophosphate|||1|0.0658|  
CMP|cytidine  
monophosphate|C0010729|||C0010729|CHV;CSP;MSH;MTH;NDFRT;SNOMEDCT|1|0.0921|1  
CMP|cytidine monophosphate (CMP)|C0010729|||C0010729|CHV|||  
CMP|cytidylic acid|C0010729|||C0010729|CHV|||  
CMP|dynamic cardiomyoplasty|C0242637|||1|0.0461|  
CMP|lomustine/methotrexate/procarbazine|||C0054385|PDQ|||  
CMP|lomustine/methotrexate/procarbazine protocol|C0054385|||C0054385|MTH|||  
CMP|matrilin 1, cartilage matrix protein|C1417041|||C1417041|HUGO|||  
CMS|CAS LIGAND WITH MULTIPLE SH3 DOMAINS|C1422519|||C1422519|OMIM|||  
CMS|CD2-ASSOCIATED PROTEIN|||C1422519|OMIM|||  
CMS|CD2-associated protein|||C1422519|HUGO|||  
CMS|CD2AP|C1422519|||C1422519|HUGO;OMIM|||  
CMS|CD2AP gene|C1422519|||C1422519|HUGO;MTH|||  
CMS|CENTERS FOR MEDICARE MEDICAID SERV|||C0041718|MSH|||  
CMS|CMS|C0041718|||C0041718;C1422519;C1880120|HUGO;NCI;OMIM|||  
CMS|Cardiovascular Measurement system|||1  
CMS|Centers for Medicare and Medicaid  
Services|C0041718|1|0.008|C0041718|MSH;MTH;NCI|1|0.1162|1  
CMS|Centers for Medicare and Medicaid Services (U.S.)|||C0041718|MSH|||  
CMS|Centers for Medicare&Medicaid Services|||1|0.053|  
CMS|Clyde Mood Scale|||1  
CMS|Colony Management System|C1880120|||C1880120|MTH;NCI|||  
CMS|Conditioned media|C0162518|||1|0.0227|  
CMS|Conflict Management Survey|||1  
CMS|Congenital Myasthenic Syndromes|C0751882|||1|0.1111|  
CMS|HCFA|C0041718|||C0041718|LNC;MSH|||  
CMS|HEALTH CARE FINANCING ADMIN|||C0041718|MSH|||  
CMS|Health Care Financing Administration|C0041718|||C0041718|MSH|||  
CMS|Health Care Financing Administration (U.S.)|||C0041718|MSH|||  
CMS|UNITED STATES CENTERS FOR MEDICARE MEDICAID SERV|||C0041718|MSH|||

CMS|UNITED STATES HEALTH CARE FINANCING ADMIN|||C0041718|MSH|||  
CMS|United States Centers for Medicare and Medicaid Services|||C0041718|MSH|||  
CMS|United States Health Care Financing  
Administration|C0041718||C0041718|MSH|||  
CMS|cardiomedastinal silhouette|||1|1|0.0505|  
CMS|cavernous malformations|||1|1|0.0505|  
CMS|center medicaid medicare services|C0041718||C0041718|CHV|||  
CMS|centers medicaid medicare services|C0041718||C0041718|CHV|||  
CMS|central margin syndrome|||1|1|1|  
CMS|central material section|||1|1|1|  
CMS|central material supply|||1|1|1|  
CMS|cervical magnetic stimulation|||1|1|0.048|  
CMS|cervical mucous solution|||1|1|1|  
CMS|cholesterol monitoring system|||1|1|1|  
CMS|chromosome modification site|||1|1|1|  
CMS|chronic mild stress|||1|1|0.1338|  
CMS|chronic mountain sickness|C0274294|||1|1|0.0732|  
CMS|chronic mycelial stomatitis|||1|1|1|  
CMS|chronic myelodysplastic syndrome|||1|1|1|  
CMS|chylomicrons|C0008731|||1|1|0.0303|  
CMS|circulation, motion, sensation||1|0.982|||1|  
CMS|clean, midstream|||1|1|1|  
CMS|click-murmur syndrome|C0026267|||1|1|1|  
CMS|clofibrate-induced muscular syndrome|||1|1|1|  
CMS|cochlear microphonics|||1|1|0.0379|  
CMS|compliance matching stent|||1|1|1|  
CMS|continuous motion syndrome|||1|1|1|  
CMS|cortical magnetic stimulation|||1|1|1|  
CMS|cystadenoma with mesenchymal stroma|||1|1|0.0177|  
CMS|cytoplasmic male sterile|||1|1|0.0859|  
CMS|cytoplasmic male sterility|||1|1|0.197|1|  
CMS|solubilization|||1|1|0.0227|  
CMS|united states centers for medicare and medicaid services|||C0041718|CHV|||  
CMV|CDDP/MTX/VBL|||C0285131|NCI;PDQ|||  
CMV|CMV|||C0010825;C0278819;C0285131|CHV;CSP;MEDLINEPLUS;NCI;PDQ|||  
CMV|CMV - Cytomegalovirus|C0010825||C0010825|SNOMEDCT|||  
CMV|CMV chemotherapy protocol|C0285131||C0285131|CHV|||  
CMV|CMV, CYTOMEGALOVIRUS|C0010825||C0010825|NCI|||  
CMV|CTX/MTX/VP-16|||C0278819|NCI;PDQ|||  
CMV|Cisplatin/Methotrexate/Vinblastine|||C0285131|NCI|||  
CMV|Clo Mor virus|C0319042|||1|1|1|  
CMV|Cyclophosphamide/Etoposide/Methotrexate|||C0278819|NCI|||  
CMV|Cytomegalovirus|C0010825||C0010825|LNC;MSH;MTH;NCBI;NCI;SNOMEDCT|||  
CMV|Cytomegalovirus (living organism) (organism)|||C0010825|SNOMEDCT|||  
CMV|Cytomegalovirus (living organism) [Ambiguous]|||C0010825|SNOMEDCT|||  
CMV|Cytomegalovirus group|C0010825||C0010825|SNOMEDCT|||  
CMV|Cytomegalovirus group virus|||C0010825|SNOMEDCT|||  
CMV|Cytomegalovirus group virus (organism)|||C0010825|SNOMEDCT|||  
CMV|Cytomegalovirus group, NOS|C0010825||C0010825|SNOMEDCT|||  
CMV|Cytomegalovirus, NOS|C0010825||C0010825|SNOMEDCT|||  
CMV|Cytomegaloviruses|C0010825||C0010825|LCH;MSH|||  
CMV|Genus Cytomegalovirus|C0010825||C0010825|SNOMEDCT|||  
CMV|Genus Cytomegalovirus (organism)|||C0010825|SNOMEDCT|||  
CMV|MCV|C0524587|||C0285131|PDQ|||  
CMV|MEC Protocol 1|C0285131||C0285131|NCI|||  
CMV|MEC protocol 1|C0285131||C0285131|MSH|||  
CMV|Salivary Gland Virus|C0010825||C0010825|MSH|||

CMV|Salivary Gland Viruses|C0010825|||C0010825|MSH|||  
 CMV|Salivary gland virus|C0010825|||C0010825|SNOMEDCT|||  
 CMV|Salivary gland virus, NOS|C0010825|||C0010825|SNOMEDCT|||  
 CMV|Virus, Salivary Gland|C0010825|||C0010825|MSH|||  
 CMV|Viruses, Salivary Gland|C0010825|||C0010825|MSH|||  
 CMV|anti-cytomegalovirus|||1|0.0062|  
 CMV|canalicular membrane vesicles|||1|0.0023|  
 CMV|cancer family syndrome|C2931592|||1|  
 CMV|cerebrospinal fluid|C0007806;C0007807|||1|  
 CMV|circumferential shortening fraction|||1|  
 CMV|cisplatin, methotrexate, vinblastine||1|0.002|||  
 CMV|cisplatin/methotrexate/vinblastine|||C0285131|PDQ|||  
 CMV|cisplatin/methotrexate/vinblastine protocol|C0285131|||C0285131|MTH|||  
 CMV|cmv cytomegalovirus|C0010825|||C0010825|CHV|||  
 CMV|colony-stimulating factor|C0009392;C0079460|||1|  
 CMV|continuous mandatory ventilation||1|0.026|||1|  
 CMV|continuous mechanical ventilation|||1|  
 CMV|contoured femoral stem|||1|  
 CMV|controlled mechanical ventilation|C0419012|||C0419012|CHV;SNOMEDCT|||1|  
 CMV|conventional mechanical ventilation|||1|0.0205|1|  
 CMV|cool mist vaporizer|||1|  
 CMV|coronary sinus flow|||1|  
 CMV|cucumber mosaic cucumovirus|||1|0.0028|  
 CMV|cucumber mosaic virus|C0520499|||1|0.0306|1|  
 CMV|cyclophosphamide/etoposide/methotrexate|||C0278819|PDQ|||  
 CMV|cyclophosphamide/etoposide/methotrexate protocol|||C0278819|MTH|||  
 CMV|cytomegaloviral|||1|0.003|  
 CMV|cytomegalovirus|C0010825|1|0.972|C0010823;C0010825|AOD;CHV;CSP;LNC;MSH;MTH;N  
 CBI;NCI;SNOMEDCT|1|0.9302|1|  
 CMV|cytomegalovirus (CMV)|C0010825|||C0010825|CHV|||  
 CMV|cytomegalovirus group|C0010825|||C0010825|CSP|||  
 CMV|cytomegalovirus infection|C0010823|||1|0.0028|  
 CMV|promoter|C0086860|||1|0.0015|  
 CMV|salivary gland virus|C0010825|||C0010825|CHV;CSP|||  
 CMV|salivary gland viruses|C0010825|||C0010825|CHV|||  
 CNS|CLIN NURSE SPECIALIST|||C0028654|MSH|||  
 CNS|CLIN NURSE SPECIALISTS|||C0028654|MSH|||  
 CNS|CNS|||C0028654;C0445625;C0927232;C2347597|AOD;CSP;FMA;NCI|||  
 CNS|CNS - Clinical nurse specialist|C0028654|||C0028654|SNOMEDCT|||  
 CNS|CNS - Coagulase-negative staphylococcus|C0445625|||C0445625|SNOMEDCT|||  
 CNS|COAGULASE NEGATIVE STAPHYLOCOCCUS|C0445625|||C0445625|NCI|||  
 CNS|Canadian Neurological Scale|||1|0.0013|  
 CNS|Central Nervous System|C0927232;C1269563|||C0927232|CST;MSH;NCI|||  
 CNS|Central Nervous Systems|C0927232|||C0927232|MSH|||  
 CNS|Central nervous  
 system|C0927232;C1269563|||C0927232|FMA;LCH;OMIM;SNOMEDCT;UWDA|||  
 CNS|Central nervous system structure|C0927232|||C0927232|SNOMEDCT|||  
 CNS|Central nervous system structure (body structure)|||C0927232|SNOMEDCT|||  
 CNS|Cerebrospinal axis|C0927232|||C0927232|FMA|||  
 CNS|Certified Nurse Specialist|C1549961;C2347597|||C2347597|MTH;NCI|||  
 CNS|Clin Spec|C0028654|||C0028654|NCI|||  
 CNS|Clinical Nurse Specialist|C0028654;C1610180|||C0028654|MSH;NCI|||  
 CNS|Clinical Nurse Specialists|C0028654|||C0028654|MSH;MTH|||  
 CNS|Clinical nurse specialist|C0028654;C1610180|||C0028654|SNOMEDCT|||  
 CNS|Clinical nurse specialist (occupation)|||C0028654|SNOMEDCT|||  
 CNS|Clinician, Nurse|C0028654|||C0028654|MSH|||  
 CNS|Clinicians, Nurse|C0028654|||C0028654|MSH|||

CNS|Coagulase-Negative Staphylococcus|C0445625|||C0445625|NCI|||  
CNS|Coagulase-negative staphylococcus|C0445625|||C0445625|SNOMEDCT|||  
CNS|Congenital nephrotic syndrome|C0268713;C0403399|||1|0.0019|  
CNS|NURSE SPECIALIST CLIN|||C0028654|MSH|||  
CNS|NURSE SPECIALISTS CLIN|||C0028654|MSH|||  
CNS|Nervous System, CNS|C0927232|||C0927232|NCI|||  
CNS|Nervous System, Central|C0927232;C1269563|||C0927232|MSH|||  
CNS|Nervous Systems, Central|C0927232|||C0927232|MSH|||  
CNS|Neuraxis|C0927232|||C0927232|FMA;MTH;UWDA|||  
CNS|Nurse Clinician|C0028654|||C0028654|MSH|||  
CNS|Nurse Clinicians|C0028654|||C0028654|MSH|||  
CNS|Nurse Specialist, Clinical|C0028654;C1610180|||C0028654|MSH|||  
CNS|Nurse Specialists, Clinical|C0028654|||C0028654|MSH|||  
CNS|Pars centralis|C0927232|||C0927232|FMA|||  
CNS|SPECIALIST CLIN NURSE|||C0028654|MSH|||  
CNS|SPECIALISTS CLIN NURSE|||C0028654|MSH|||  
CNS|Specialist, Clinical Nurse|C0028654;C1610180|||C0028654|MSH|||  
CNS|Specialists, Clinical Nurse|C0028654|||C0028654|MSH|||  
CNS|Staphylococcus, coagulase negative|C0445625|||C0445625|SNOMEDCT|||  
CNS|Staphylococcus, coagulase negative  
(organism)|C0445625|||C0445625|MTH;SNOMEDCT|||  
CNS|Structure of central nervous system|C0927232|||C0927232|SNOMEDCT|||  
CNS|Structure of central nervous system (body structure)|||C0927232|SNOMEDCT|||  
CNS|System, Central Nervous|C0927232;C1269563|||C0927232|MSH|||  
CNS|Systema nervosum centrale|C0927232|||C0927232|FMA|||  
CNS|Systems, Central Nervous|C0927232|||C0927232|MSH|||  
CNS|central nervous|||1|0.0009|  
CNS|central nervous  
system|C0927232;C1269563|1|0.998|C0927232;C1269563|AOD;CSP;CST;FMA;LCH;MSH;NCI;O  
MIM;SNOMEDCT;UWDA|1|0.9558|1  
CNS|clinical nurse  
specialist|C0028654;C1610180|1|0.002|C0028654;C1610180|CHV;HL7V3.0;MSH;NCI;SNOME  
DCT|1|0.0113|  
CNS|clinical nurse specialists|C0028654|||C0028654|CHV|||  
CNS|coagulase negative staphylococcus|C0445625|||C0445625|CHV|||  
CNS|coagulase-negative staphylococcal|||1|0.0005|  
CNS|coagulase-negative staphylococci|||1|0.0258|  
CNS|coagulase-negative  
staphylococcus|C0445625|||C0445625|NCI;SNOMEDCT|1|0.0025|1  
CNS|computerized notation system|||1  
CNS|congenital nephrotic  
syndrome|C0268713;C0403399|||C0268713|CHV;NCI;SNOMEDCT|||1  
CNS|neuraxis|C0927232|||C0927232|AOD;CHV|||  
CNS|nurse clinician|C0028654|||C0028654|CHV|||  
CNS|nurse clinicians|C0028654|||C0028654|CHV|||  
COPD|CAFL - Chronic airflow limitation|C0024117|||C0024117|SNOMEDCT|||  
COPD|CAL - Chronic airflow limitation|C0024117|||C0024117|SNOMEDCT|||  
COPD|CHRONIC OBSTRUCTIVE AIRWAY DIS|||C0024117|MSH|||  
COPD|CHRONIC OBSTRUCTIVE LUNG DIS|||C0024117|MSH|||  
COPD|CHRONIC OBSTRUCTIVE LUNG DISEASE|C0024117|||C0024117|COSTAR;DXP|||  
COPD|CHRONIC OBSTRUCTIVE PULM DIS|||C0024117|MSH|||  
COPD|CHRONIC OBSTRUCTIVE PULMONARY  
DISEASE|C0024117;C1847014|||C0024117|DXP;MTH|||  
COPD|CHRONIC OBSTRUCTIVE PULMONARY DISEASE,  
(COPD)|C0024117;C1847014|||C0024117|NCI|||  
COPD|COAD|C0024117|||C0024117|MSH;NDFRT|||  
COPD|COAD - Chronic obstructive airways disease|C0024117|||C0024117|SNOMEDCT|||

COPD|COLD|C0009264;C0009443;C0234192|||C0024117|NCI;SNOMEDCT|||  
COPD|COLD (chronic obstructive lung disease)|C0024117|||C0024117|CSP|||  
COPD|COLD - Chronic obstructive lung disease|C0024117|||C0024117|SNOMEDCT|||  
COPD|COPD|C0024117|||C0024117;C1847014|CHV;CSP;DXP;LNC;MSH;NCI;NDFRT;OMIM;SNOMED  
CT|||  
COPD|COPD (Chronic Obstructive Pulmonary  
Disease)|C0024117|||C0024117|MEDLINEPLUS|||  
COPD|COPD - Chronic obstructive pulmonary  
disease|C0024117|||C0024117|SNOMEDCT|||  
COPD|COPD NOS|C0024117|||C0024117|MTHICD9|||  
COPD|COPD, CHRONIC OBSTRUCTIVE PULMONARY DISEASE|C0024117|||C0024117|NCI|||  
COPD|Chronic Obstructive Airway Disease|C0024117|||C0024117|MSH;MTH;NDFRT|||  
COPD|Chronic Obstructive Airways Disease|C0024117|||C0024117|NCI|||  
COPD|Chronic Obstructive Lung Disease|C0024117|||C0024117|MSH;NCI;NDFRT|||  
COPD|Chronic Obstructive Pulmonary  
Disease|C0024117;C1847014|||C0024117|CHV;MEDLINEPLUS;MSH;NCI;NDFRT|||  
COPD|Chronic Obstructive Pulmonary Disease  
(COPD)|C0024117;C1847014|||C0024117|NCI|||  
COPD|Chronic airflow limitation|C0024117|||C0024117|SNOMEDCT|||  
COPD|Chronic airway disease|C0024117|||C0024117|SNOMEDCT|||  
COPD|Chronic airway obstruction|C0024117|||C0024117|SNOMEDCT|||  
COPD|Chronic airway obstruction; not otherwise  
specified|C0024117;C1518425|||C0024117|CCS|||  
COPD|Chronic irreversible airway obstruction|C0024117|||C0024117|SNOMEDCT|||  
COPD|Chronic obstructive airway disease|C0024117|||C0024117|SNOMEDCT|||  
COPD|Chronic obstructive airways disease NOS|C0024117|||C0024117|SNOMEDCT|||  
COPD|Chronic obstructive airways disease NOS (disorder)|||C0024117|SNOMEDCT|||  
COPD|Chronic obstructive lung  
disease|C0024117|||C0024117|LNC;MTHICD9;SNOMEDCT|||  
COPD|Chronic obstructive lung disease (disorder)|||C0024117|SNOMEDCT|||  
COPD|Chronic obstructive lung disease [Ambiguous]|||C0024117|SNOMEDCT|||  
COPD|Chronic obstructive lung disease, NOS|C0024117|||C0024117|SNOMEDCT|||  
COPD|Chronic obstructive pulmonary  
disease|C0024117;C1847014|||C0024117|OMIM;SNOMEDCT|||  
COPD|Chronic obstructive pulmonary disease  
NOS|C0024117;C1847014|||C0024117|MTHICD9;SNOMEDCT|||  
COPD|Chronic obstructive pulmonary disease  
finding|C0024117|||C0024117|SNOMEDCT|||  
COPD|Chronic obstructive pulmonary disease finding  
(finding)|||C0024117|SNOMEDCT|||  
COPD|DISEASE (COPD), CHRONIC OBSTRUCTIVE|||C0024117|NCI|||  
COPD|OBSTRUCTIVE PULMONARY DISEASE (COPD), CHRONIC|C0024117|||C0024117|NCI|||  
COPD|PULM DIS CHRONIC OBSTRUCTIVE|||C0024117|MSH|||  
COPD|PULMONARY DISEASE (COPD), CHRONIC OBSTRUCTIVE|C0024117|||C0024117|NCI|||  
COPD|PULMONARY DISEASE, CHRONIC OBSTRUCTIVE|C0024117;C1847014|||C1847014|OMIM|||  
COPD|PULMONARY DISEASE, CHRONIC OBSTRUCTIVE, SEVERE EARLY-  
ONSET|C1847014|||C1847014|MTH;OMIM|||  
COPD|Pulmonary Disease, Chronic  
Obstructive|C0024117;C1847014|||C0024117|MSH;NDFRT|||  
COPD|Pulmonary Disease, Chronic Obstructive  
[Disease/Finding]|||C0024117|NDFRT|||  
COPD|chronic airflow limitation|C0024117|||C0024117|CHV|||  
COPD|chronic airway disease|C0024117|||C0024117|CHV|||  
COPD|chronic airways disease|C0024117|||C0024117|CHV|||  
COPD|chronic obstructive lung disease|C0024117|||C0024117|AOD;CHV;CSP|||

COPD|chronic obstructive pulmonary disease|C0024117;C1847014|1|1.000|C0024117|CHV;CSP;DXP;MEDLINEPLUS;MSH;MTH;NCI;NDFRT;OMIM;SNOMEDCT|1|1|1

COPD|chronic obstructive pulmonary disease (COPD)|C0024117;C1847014|||C0024117|CHV|||

COPD|coad|C0024117|||C0024117|CHV|||

COR|3' deoxyadenosine|C0056331|||C0056331|CSP|||

COR|3'-Deoxyadenosine|C0056331|||C0056331|NCI;PDQ;SNOMEDCT|||

COR|3'-Deoxyadenosine (product)|||C0056331|SNOMEDCT|||

COR|3'-Deoxyadenosine (substance)|||C0056331|SNOMEDCT|||

COR|3'-dA-CE Phosphoramidite|C0056331|||C0056331|NCI;PDQ|||

COR|3'-deoxyadenosine|C0056331|||C0056331|MSH|||

COR|3-dAdenosine|C0056331|||C0056331|NCI;PDQ|||

COR|9-Cordyceposidoadenine|C0056331|||C0056331|NCI;PDQ|||

COR|COR|C0018787;C0056331|||C0056331|NCI;PDQ|||

COR|CORDYCEPIN|C0056331|||C0056331|NCI|||

COR|Cardiac|C0018787;C1522601|||C0018787|NCI|||

COR|Cardiac structure|C0018787|||C0018787|SNOMEDCT|||

COR|Cardiac structure (body structure)|||C0018787|SNOMEDCT|||

COR|Congo red|C0009742|||1|

COR|Cor|C0018787;C0056331|||C0018787|FMA|||

COR|Cordycepin|C0056331|||C0056331|MTH;NCI|||

COR|Cordycepine|C0056331|||C0056331|NCI;PDQ|||

COR|HEART|C0018787;C1281570|||C0018787|NCI|||

COR|Heart|C0018787;C1281570|||C0018787|AIR;FMA;HL7V2.5;LCH;LNC;MSH;MTH;NCI;OMIM;SNOMEDCT;UWDA|||

COR|Heart structure|C0018787|||C0018787|SNOMEDCT|||

COR|Heart structure (body structure)|||C0018787|SNOMEDCT|||

COR|Heart, NOS|C0018787;C1281570|||C0018787|SNOMEDCT|||

COR|Hearts|C0018787|||C0018787|MSH|||

COR|Kordicepin|C0056331|||C0056331|NCI;PDQ|||

COR|body|C0242821;C0460148;C1268086|||1|

COR|cardi(o)-|||C0018787|AOD|||

COR|cardiac|C0018787;C1522601|||C0018787|AOD;CHV;CSP|||

COR|cardiac output recorder|||1|

COR|cardiac structure|C0018787|||C0018787|CHV|||

COR|cardiovascular|C0007226|1|0.980|||

COR|center of rotation|C2986818|||1|0.0885|

COR|cervico-ocular reflex|||1|0.2478|

COR|cervicoocular reflex|||1|

COR|coefficient of repeatability|||1|0.0796|

COR|coefficient of reproducibility|||1|

COR|cold-regulated|||1|0.0796|

COR|conditioned orientation reflex|||1|

COR|cordycepin|C0056331|||C0056331|CHV;CSP;MSH;NCI;PDQ|||

COR|corepressor|||1|

COR|coronary|C0018787|||C0018787|CSP|||1

COR|coroner|C0010082|||1|

COR|corrosion|C0010106;C1880183;C2919087|||C0010106;C1880183|CHV;CSP;MSH;MTH;NCI|||1

COR|corrosive|C0524525|||C0524525;C1548763;C1551398|CHV;HL7V2.5;HL7V3.0|||1

COR|cortex|C0007776;C1176472;C2700441|||C0001614;C0007776;C0595905;C1176472;C2700441|CHV;CST;FMA;NCI;UWDA|||

COR|corticosterone|C0010124|||1|0.1858|

COR|cortisol|C0020268|||1|0.1858|

COR|cortisone|C0010137|||C0010137|AOD;CHV;CSP;LCH;LNC;MSH;MTH;NCI;NDFRT;PDQ;RXNORM;SNOMEDCT;USPMG;VANDF|||1

COR|heart|C0018787;C1281570|||C0018787|AOD;CHV;CSP|||  
COR|heart structure|C0018787|||C0018787|CHV|||  
COR|phytotoxin coronatine|||1|0.1327|  
CPAP|BM032|C1424863|||C1424863|HUGO|||  
CPAP|CENPJ|C1424863|||C1424863|HUGO;OMIM|||  
CPAP|CENPJ gene|C1424863|||C1424863|HUGO;MTH|||  
CPAP|CENTROMERIC PROTEIN J|C1424863|||C1424863|OMIM|||  
CPAP|CENTROSOMAL P4.1-ASSOCIATED PROTEIN|C1424863|||C1424863|OMIM|||  
CPAP|CPAP|C0199451;C1424863|||C0199451;C1424863|CHV;CSP;HUGO;MTHICD9;OMIM|||  
CPAP|CPAP (continuous positive airway pressure)|||C0199451|CSP|||  
CPAP|CPAP - Continuous positive airways pressure|||C0199451|SNOMEDCT|||  
CPAP|CPAP - Continuous positive airways pressure therapy|||C0199451|SNOMEDCT|||  
CPAP|CPAP Ventilation|C0199451|||C0199451|MSH|||  
CPAP|CPAP treatment|C0199451|||C0199451|SNOMEDCT|||  
CPAP|Continuous CPAP|C0199451|||C0199451|SNOMEDCT|||  
CPAP|Continuous CPAP (procedure)|||C0199451|SNOMEDCT|||  
CPAP|Continuous CPAP (regime/therapy)|||C0199451|SNOMEDCT|||  
CPAP|Continuous Positive Airway Pressure|C0199451|||C0199451|MSH;MTH|||  
CPAP|Continuous positive airway pressure breathing|||1|0.004|  
CPAP|Continuous positive airway pressure ventilation  
treatment|C0199451|||C0199451|SNOMEDCT|||  
CPAP|Continuous positive airway pressure ventilation treatment  
(procedure)|||C0199451|SNOMEDCT|||  
CPAP|Continuous positive airway pressure ventilation treatment  
(regime/therapy)|||C0199451|SNOMEDCT|||  
CPAP|Continuous positive airways pressure|||C0199451|SNOMEDCT|||  
CPAP|Continuous positive airways pressure (observable  
entity)|||C0199451|SNOMEDCT|||  
CPAP|Continuous positive airways pressure therapy|||C0199451|SNOMEDCT|||  
CPAP|LAP|||C1424863|HUGO|||  
CPAP|LIP1|C1418785;C1424863;C1426073|||C1424863|HUGO|||  
CPAP|Pressure.continuous positive airway|C0199451|||C0199451|LNC|||  
CPAP|SASS4|C1424863|||C1424863|HUGO|||  
CPAP|Sas-4|C1424863|||C1424863|HUGO|||  
CPAP|Ventilation, CPAP|C0199451|||C0199451|MSH|||  
CPAP|centromere protein J|C1424863|||C1424863|HUGO|||  
CPAP|constant positive airway pressure||1|1.000|||1|  
CPAP|continuous positive airway  
pressure|C0199451|||C0199451|CSP;MSH;MTH|1|0.996|  
CPAP|continuous positive airway pressure (CPAP)|C0199451|||C0199451|CHV|||  
CPAP|cpap treatment|C0199451|||C0199451|CHV|||  
CPAP|cpap ventilation|C0199451|||C0199451|CHV|||  
CPK|ADP Phosphocreatine Phosphotransferase|C0010287|||C0010287|MSH;NDFRT|||  
CPK|ATP Creatine Phosphotransferase|C0010287|||C0010287|MSH;NDFRT|||  
CPK|ATP:creatine N-phosphotransferase|||C0010287|MSH;NDFRT|||  
CPK|C2-CONTAINING PHOSPHATIDYLINOSITOL KINASE|C1418571|||C1418571|OMIM|||  
CPK|CK - Creatine kinase|C0010287|||C0010287|SNOMEDCT|||  
CPK|CKB|||C0010287|NCI|||  
CPK|CPK|||C0010287;C1418571|CHV;OMIM|||  
CPK|CPK - Creatine phosphokinase|C0010287|||C0010287|SNOMEDCT|||  
CPK|Cell proliferation kinetics|||1|0.0106|  
CPK|Creatine Kinase|C0010287|||C0010287|MSH;MTH;NCI;NDFRT|||  
CPK|Creatine Kinase [Chemical/Ingredient]|||C0010287|NDFRT|||  
CPK|Creatine Kinase-B|C0010287|||C0010287|NCI|||  
CPK|Creatine Kinase-B Chain|C0010287|||C0010287|NCI|||  
CPK|Creatine Phosphokinase|C0010287|||C0010287|MSH;MTH;NCI;NDFRT|||  
CPK|Creatine Phosphotransferase, ATP|C0010287|||C0010287|MSH|||

CPK|Creatine kinase|C0010287|||C0010287|LCH;LNC;SNOMEDCT|||  
CPK|Creatine kinase (substance)|||C0010287|SNOMEDCT|||  
CPK|Creatine phosphokinase|C0010287|||C0010287|SNOMEDCT|||  
CPK|EC 2.7.3.2|||C0010287|NCI|||  
CPK|Kinase, Creatine|C0010287|||C0010287|MSH|||  
CPK|PHOSPHATIDYLINOSITOL 3-KINASE, CLASS 2, ALPHA|C1418571|||C1418571|OMIM|||  
CPK|PI3K-C2alpha|C1418571|||C1418571|HUGO|||  
CPK|PIK3C2A|C1418571|||C1418571|HUGO;OMIM|||  
CPK|PIK3C2A gene|C1418571|||C1418571|HUGO;MTH|||  
CPK|Phosphocreatine Phosphotransferase, ADP|C0010287|||C0010287|MSH|||  
CPK|Phosphokinase, Creatine|C0010287|||C0010287|MSH|||  
CPK|Phosphotransferase, ADP Phosphocreatine|C0010287|||C0010287|MSH|||  
CPK|Phosphotransferase, ATP Creatine|C0010287|||C0010287|MSH|||  
CPK|calcium-dependent protein kinase|C0054490|||C0054490|MSH|||  
CPK|creatine kinase|C0010287|||C0010287|AOD;CHV;CSP|1|0.0505|  
CPK|creatine kinase (CK)|C0010287|||C0010287|CHV|||  
CPK|creatine phosphate kinase|||1|0.0106|  
CPK|creatine  
phosphokinase|C0010287|1|1.000|C0010287;C0750863|AOD;CHV;MSH;MTH;NCI;NDFRT;SNOME  
DCT|1|0.9002|1  
CPK|creatine phosphokinase (CPK)|C0010287|||C0010287|CHV|||  
CPK|creatinephosphokinase|||1|0.0117|  
CPK|phosphoinositide-3-kinase, class 2, alpha  
polypeptide|C1310696;C1418571|||C1418571|HUGO|||  
CPK|phosphokinase activity|C2266365|||1|0.0164|  
CPM|(-)-Cyclophosphamide|C0010583|||C0010583|NCI|||  
CPM|2H-1,3,2-Oxazaphosphorin-2-amine, N,N-bis(2-chloroethyl)tetrahydro-, 2-  
oxide|||C0010583|MSH;NDFRT|||  
CPM|2H-1,3,2-oxazaphosphorin-2-amine, N,N-is(2-chloroethyl)tetrahydro-, 2-  
oxide|||C0010583|PDQ|||  
CPM|CARBOXYPEPTIDASE M|C0054762;C1413672|||C1413672|OMIM|||  
CPM|CPM|||C0010583;C1413672;C1705768|HUGO;NCI;OMIM;PDQ;SNOMEDCT|||  
CPM|CPM gene|C1413672|||C1413672|HUGO;MTH|||  
CPM|CTX|C0293227|||C0010583|NCI;PDQ;SNOMEDCT|||  
CPM|CYCLOPHOSPHAMIDE|C0010583|||C0010583|MTHSPL;NCI;NDFRT;VANDF|||  
CPM|CYT|C0010583|||C0010583|SNOMEDCT|||  
CPM|Carboxypeptidase M|C0054762;C1413672|||1|0.0276|  
CPM|Cefpiramide|C0055010|||1|0.0763|  
CPM|Ciclofosfamida|C0010583|||C0010583|NCI;PDQ|||  
CPM|Ciclofosfamida|C0010583|||C0010583|NCI;PDQ|||  
CPM|Claphene|C0010583|||C0010583|NCI;PDQ|||  
CPM|Clinical Practice Model|||1  
CPM|Colored Progressive Matrices|||1  
CPM|Continuous Passive Motion|||1|0.1656|  
CPM|Contralateral Prophylactic Mastectomy|C1705768|||C1705768|MTH;NCI|||  
CPM|Count per Minute|C0392412|||C0392412|NCI|||  
CPM|Count/Minute|||C0392412|NCI|||  
CPM|Counts per minute|C0392412|||C0392412|MTH|||  
CPM|Counts per minute (cpm)|C0392412|||C0392412|CHV|||  
CPM|Cycle per Minute|C2348028|||C2348028|MTH;NCI|||  
CPM|Cycle/min|||C2348028|NCI|||  
CPM|Cyclophospham|C0010583|||C0010583|NCI;PDQ|||  
CPM|Cyclophosphamide|C0010583|||C0010583|LNC;MSH;MTH;NCI;NDFRT;RXNORM;SNOMEDCT;U  
SPMG|||  
CPM|Cyclophosphamide (product)|||C0010583|SNOMEDCT|||  
CPM|Cyclophosphamide (substance)|||C0010583|SNOMEDCT|||  
CPM|Cyclophosphamide [Chemical/Ingredient)|||C0010583|NDFRT|||

CPM|Cyclophosphamidum|C0010583|||C0010583|NCI;PDQ|||  
 CPM|Cyclophosphan|C0010583|||C0010583|NCI;PDQ|||  
 CPM|Cyclophosphane|C0010583|||C0010583|MSH;NCI;NDFRT|||  
 CPM|Cyclophosphanum|C0010583|||C0010583|NCI;PDQ|||  
 CPM|Cytosphosphan|C0010583|||C0010583|MSH;NCI;NDFRT;PDQ|||  
 CPM|Cytosphosphane|C0010583|||C0010583|NCI;PDQ|||  
 CPM|Mitoxan|C0010583|||C0010583|NCI;PDQ|||  
 CPM|N,N-Bis(2-chloroethyl)tetrahydro-2H-1,3,2-oxazaphosphorin-2-amine 2-Oxide|||C0010583|PDQ|||  
 CPM|Syklofosfamid|C0010583|||C0010583|NCI;PDQ|||  
 CPM|Zytosan|C0010583|||C0010583|PDQ|||  
 CPM|cancer pain management|C0392921|||1|||1  
 CPM|carboxypeptidase M|C0054762;C1413672|||C1413672|HUGO|||  
 CPM|central pontine myelinolysis|C0206083|||1|0.1867|1  
 CPM|chlorpheniramine maleate|C0546857|||1|0.0487|  
 CPM|chronic progressive myelopathy|||1|||1  
 CPM|cognitive-perceptual-motor|||1|||1  
 CPM|confined placental mosaicism|||1|0.0763|1  
 CPM|continue present management|||1|||1  
 CPM|continuous passive motion||1|1.000|||1  
 CPM|count per minute|C0392412|||1|||1  
 CPM|counts per minute|C0392412|||C0392412|SNOMEDCT|1|0.1396|  
 CPM|cpm|||C0392412;C2348028|NCI;SNOMEDCT|||  
 CPM|cpm (qualifier value)|||C0392412|SNOMEDCT|||  
 CPM|critical path method|||1|0.013|  
 CPM|cycle per minute|C2348028|||1|||1  
 CPM|cycle/min|||C2348028|NCI|||  
 CPM|cyclophosphamide|C0010583|||C0010583|CHV;CSP;MTHSPL;NCI;PDQ|1|0.2597|  
 CPM|cyclophosphane|C0010583|||C0010583|CHV|||  
 CPM|cyt|C0010583|||C0010583|CHV|||  
 CPM|cyts|C0010583|||C0010583|CHV|||  
 CPM|percentage of normal 2-4 cycles/min|||1|0.0065|  
 CPR|C-peptide immunoreactivity|||1|0.0289|  
 CPR|C-peptide reactivity|||1|0.0054|  
 CPR|CARDIO PULM RESUSCITATION|||C0007203|MSH|||  
 CPR|CARDIOPULM RESUSCITATION|||C0007203|MSH|||  
 CPR|CPR|C0007203|||C0007203|AOD;CHV;CSP;MEDLINEPLUS;MSH|||  
 CPR|CPR (cardiopulmonary resuscitation)|C0007203|||C0007203|CSP|||  
 CPR|CPR - Cardiopulmonary resuscitation|C0007203|||C0007203|SNOMEDCT|||  
 CPR|Cardio Pulmonary Resuscitation|C0007203|||C0007203|MSH|||  
 CPR|Cardio-Pulmonary Resuscitation|C0007203|||C0007203|MSH|||  
 CPR|Cardiopulm resuscita NOS|||C0007203|ICD9CM|||  
 CPR|Cardiopulmonary Resuscitation|C0007203|||C0007203|MEDLINEPLUS;MSH|||  
 CPR|Cardiopulmonary resuscitation|C0007203|||C0007203|MEDLINEPLUS;SNOMEDCT|||  
 CPR|Cardiopulmonary resuscitation (& closed cardiac massage & ventilation)|||C0007203|SNOMEDCT|||  
 CPR|Cardiopulmonary resuscitation (& closed cardiac massage & ventilation) (procedure)|||C0007203|SNOMEDCT|||  
 CPR|Cardiopulmonary resuscitation (procedure)|||C0007203|SNOMEDCT|||  
 CPR|Cardiopulmonary resuscitation, NOS|C0007203|||C0007203|SNOMEDCT|||  
 CPR|Cardiopulmonary resuscitation, not otherwise specified|C0007203|||C0007203|ICD9CM|||  
 CPR|Closed cardiac massage+ventil.|||C0007203|SNOMEDCT|||  
 CPR|Computerized Patient Record|C0600372|||1|0.0102|  
 CPR|P450 reductase|||1|0.0278|  
 CPR|Resuscitation, Cardio-Pulmonary|C0007203|||C0007203|MSH|||  
 CPR|Resuscitation, Cardiopulmonary|C0007203|||C0007203|MSH|||

CPR|carboxypeptidase R|C0255161|||||1|0.0043|  
CPR|cardiac and pulmonary rehabilitation|||||||1  
CPR|cardio-pulmonary resuscitation|C0007203|||C0007203|CHV|||  
CPR|cardiopulmonary reserve|||||||1  
CPR|cardiopulmonary  
resuscitation|C0007203|1|0.994|C0007203|AOD;CHV;CSP;MEDLINEPLUS;MSH;SNOMEDCT|1|0  
.8239|1  
CPR|cardiopulmonary resuscitation (CPR)|C0007203|||C0007203|CHV|||  
CPR|cefpirome|C0062986|||||1|0.0214|  
CPR|cefpirome sulfate|C0771341|||||1|0.0054|  
CPR|centripetal rub|||||||1  
CPR|cerebral cortex perfusion rate|||||||1  
CPR|chicken progesterone receptor|||||1|0.0075|  
CPR|chlorophenyl red|||||||1  
CPR|clinical partial response|||||||1  
CPR|clinical pregnancy rate|||||1|0.0037|  
CPR|cochleopalpebral reflex|C0450273|||||||1  
CPR|computer-based patient record|||||||1|0.0273|1  
CPR|contraceptive prevalence rate|||||1|0.0139|  
CPR|cortisol production rate|||||1|0.0043|1  
CPR|cumulative potency rate|||||||1  
CPR|cumulative pregnancy rate|||||1|0.0048|  
CPR|curved multiplanar reformation|||||||1  
CPR|customary, prevailing, and reasonable|||||||1  
CPR|cytochrome P450 oxidoreductase|C1335232|||||1|0.0032|  
CPR|heart resuscitation|C0007203|||C0007203|CSP|||  
CPR|response|C0871261;C1704632;C1706817;C2911692|||||1|0.008|  
CRP|C Reactive Protein|C0006560;C0201657;C1879974|||C0006560;C0201657|MSH;NCI|||  
CRP|C reactive protein|C0006560;C0201657;C1879974|||C0006560|CSP;LNC;SNOMEDCT|||  
CRP|C reactive protein (substance)|||C0006560|SNOMEDCT|||  
CRP|C-REACTIVE PROTEIN, PENTRAXIN-RELATED|C1413716|||C1413716|OMIM|||  
CRP|C-Reactive  
Protein|C0006560;C0201657;C1879974|||C0006560;C1879974|MSH;NCI;NDFRT|||  
CRP|C-Reactive Protein Gene|C1879974|||C1879974|NCI|||  
CRP|C-Reactive Protein Measurement|C0201657|||C0201657|NCI|||  
CRP|C-Reactive Protein [Chemical/Ingredient]||||C0006560|NDFRT|||  
CRP|C-Reactive Protein [Precursor]|C0006560|||C0006560|NCI|||  
CRP|C-Reactive Protein, Pentraxin-Related Gene|C1413716|||C1413716|NCI|||  
CRP|C-Reactive Protein, Pentraxin-Related wt Allele|C1879974|||C1879974|NCI|||  
CRP|C-reactive  
protein|C0006560;C0201657;C1879974|1|1.000|C0006560|CHV;LCH;MTH;SNOMEDCT|1|0.983  
5|1  
CRP|C-reactive protein level|C0201657;C0428528|||C0201657|SNOMEDCT|||  
CRP|C-reactive protein measurement|C0201657|||C0201657|MTH;SNOMEDCT|||  
CRP|C-reactive protein measurement (procedure)|||C0201657|SNOMEDCT|||  
CRP|C-reactive protein, pentraxin-related|C1413716|||C1413716|HUGO|||  
CRP|CRP|||C0006560;C0201657;C1413716;C1413766;C1826658;C1879974|CHV;HUGO;NCI;OM  
IM;SNOMEDCT|||  
CRP|CRP - C-reactive protein|C0006560|||C0006560|SNOMEDCT|||  
CRP|CRP - C-reactive protein level|C0201657|||C0201657|SNOMEDCT|||  
CRP|CRP Gene|C1413716|||C1413716|NCI|||  
CRP|CRP gene|C1413716|||C1413716|HUGO;MTH|||  
CRP|CRP wt Allele|C1879974|||C1879974|MTH;NCI|||  
CRP|CRP1|||C1413766|OMIM|||  
CRP|CSRP|||C1413766|HUGO;OMIM|||  
CRP|CSRP1|C1413766|||C1413766|HUGO;OMIM|||  
CRP|CSRP1 gene|C1413766|||C1413766|HUGO;MTH|||

CRP|CYSTEINE- AND GLYCINE-RICH PROTEIN 1||||C1413766|OMIM|||  
CRP|CYSTEINE-RICH PROTEIN|C0599731;C1413766;C1420342|||C1413766|OMIM|||  
CRP|CYSTEINE-RICH PROTEIN 1|C1413766|||C1413766|OMIM|||  
CRP|Canalith Repositioning Procedure|||||1|0.0025|  
CRP|D1S181E|C1413766|||C1413766|HUGO|||  
CRP|MGC88244|C1879974|||C1879974|NCI|||  
CRP|PENTRAXIN 1, SHORT|C1413716|||C1413716|OMIM|||  
CRP|PPIAP10|C1826658|||C1826658|HUGO|||  
CRP|PPIAP10 gene|C1826658|||C1826658|HUGO;MTH|||  
CRP|PTX1||||C1413716;C1879974|HUGO;NCI;OMIM|||  
CRP|Protein, C-Reactive|C0006560;C0201657;C1879974|||C0006560|MSH|||  
CRP|Proteins, specific or class, C-reactive|||C0006560|MSH;NDFRT|||  
CRP|c reactive protein|C0006560;C0201657;C1879974|||C0006560|CHV|||  
CRP|c reactive proteins|C0006560|||C0006560|CHV|||  
CRP|c-reactive protein (CRP)|C0006560;C0201657;C1879974|||C0006560|CHV|||  
CRP|c-reactive protein (CRP) test|C0850970|||C0201657|CHV|||  
CRP|canalith repositioning procedure|||||1  
CRP|cardiac rehabilitation program|||||1|0.0021|  
CRP|chronic recurrent parotitis|||||1  
CRP|chronic relapsing pancreatitis|||||1  
CRP|collagen-related peptide|||||1|0.0075|  
CRP|colorectal polyps|C0949059|||||1  
CRP|confluent and reticulate  
papillomatosis|C0263385|||C0263385|MTHICD9;SNOMEDCT|||  
CRP|confluent and reticulated papillomatosis|||||1|0.0025|  
CRP|confluent reticulated papillomatosis|||||1  
CRP|corneal reflection pupillometer|||||1  
CRP|corneal-retinal potential|||||1  
CRP|coronary rehabilitation program|||||1  
CRP|creatine phosphate|C0031634|||||1  
CRP|cross-reacting protein|||||1  
CRP|cyclic adenosine monophosphate receptor protein|||||1  
CRP|cyclophilin related pseudogene|||C1826658|HUGO|||  
CRP|cysteine and glycine-rich protein 1||||C1413766|HUGO|||  
CRP|pentraxin 1|C1413716|||C1413716|HUGO|||  
CRP|peptidylprolyl isomerase A (cyclophilin A) pseudogene 10||||C1826658|HUGO|||  
CRP|platelet recovery|||||1|0.0019|  
CR|C-reactive||1|0.002|||||  
CR|CD55|||C1824670|HUGO;OMIM|||  
CR|CD55 ANTIGEN|C0108793;C1824670|||C1824670|OMIM|||  
CR|CD55 gene|C1824670|||C1824670|HUGO;MTH|||  
CR|CD55 molecule, decay accelerating factor for complement (Cromer blood  
group)|||C1824670|HUGO|||  
CR|CHROMIUM|C0008574;C1445745;C2348261|||C0008574|MTHSPL;NDFRT;VANDF|||  
CR|COSTA RICA|C0010182|||C0010182|NCI|||  
CR|CR|||C0010182;C0677874;C1420667;C1707506;C1824670|HUGO;NCI|||  
CR|CRGF|C1420667|||C1420667|OMIM|||  
CR|CRI|C0010182;C1704519|||C0010182|NCI|||  
CR|CRIPTO|C1332788;C1420667;C1705780|||C1420667|HUGO|||  
CR|CRIPTO GROWTH FACTOR|C1420667|||C1420667|OMIM|||  
CR|CROM|C1292305;C1824670|||C1824670|HUGO|||  
CR|CS|C2987276|||C0010182|NCI|||  
CR|Cajal-Retzius|||||1|0.0065|  
CR|Caloric restriction|C1135809|||||1|0.0289|  
CR|Calreticulin|C0054543;C1413096|||||1|0.0021|  
CR|Cardiac Rehabilitation|C0700431|||||1|0.0128|  
CR|Charles River|||||1|0.0015|

CR|Chromium|C0008574;C1445745;C2348261|||C0008574;C2348261|LCH;LNC;MEDLINEPLUS;M  
SH;MTH;NCI;NDFRT;RXNORM;SNOMEDCT|||  
CR|Chromium (substance)|||C0008574|SNOMEDCT|||  
CR|Chromium [Chemical/Ingredient]|||C0008574|NDFRT|||  
CR|Chromium, NOS|C0008574;C1445745;C2348261|||C0008574|SNOMEDCT|||  
CR|Complete Remission|C0677874|||C0677874|NCI|||  
CR|Complete response|C0677874|||1|0.2902|  
CR|Congo red|C0009742|||1|0.0059|1  
CR|Controlled Release|C0868939;C1707506|||C1707506|NCI|||  
CR|Controlled Release Dosage Form|C1707506|||C1707506|MTH;NCI|||  
CR|Controlled Release Dose Form|C1707506|||C1707506|NCI|||  
CR|Costa Rica|C0010182|||C0010182|AOD;LCH;MSH;MTH;NCI;SNOMEDCT|||  
CR|Costa Rica (geographic location)|||C0010182|SNOMEDCT|||  
CR|Cr|||C0008574;C2348261|LNC;NCI|||  
CR|Cr - Chromium|C0008574|||C0008574|SNOMEDCT|||  
CR|Cr element|C0008574|||C0008574|CSP|||  
CR|Cripto-1|C1420667|||C1420667|HUGO|||  
CR|Cryptococcus|C0010415|||1|  
CR|Czech Republic|C0206578|||1|0.003|  
CR|DAF|C0108793;C1824670|||C1824670|OMIM|||  
CR|DECAY-ACCELERATING FACTOR FOR COMPLEMENT|C1824670|||C1824670|OMIM|||  
CR|Dietary Chromium|C2348261|||C2348261|MTH;NCI|||  
CR|In complete remission|C0677874|||C0677874|MTH;SNOMEDCT|||  
CR|In complete remission (qualifier value)|||C0677874|SNOMEDCT|||  
CR|NATO code for dibenz(b,f)-1:4-oxazepine|||1|  
CR|Pathological Complete Remission|C0677874|||C0677874|NCI|||  
CR|TC|C0041405;C1824670|||C1824670|HUGO;LNC|||  
CR|TDGF1|C1420667|||C1420667|HUGO;OMIM|||  
CR|TDGF1 gene|C1420667|||C1420667|HUGO;MTH|||  
CR|TERATOCARCINOMA-DERIVED GROWTH FACTOR 1|||C1420667|OMIM|||  
CR|achieved complete remission|||1|0.001|  
CR|calcification rate|||1|  
CR|calcium-binding protein calretinin|||1|0.0023|  
CR|calorie restricted|||1|  
CR|calorie restriction|||1|0.0107|  
CR|calorie-restricted|||1|0.0017|  
CR|capillary refill|C0425716|||1|  
CR|capture-recapture|||1|0.0014|  
CR|carbonyl reductase|C1413154|||1|0.0031|  
CR|cardiac rehabilitation|C0700431|||1|  
CR|cardiac resuscitation|C2981152|||C2981152|CHV;LCH;SNOMEDCT|||1  
CR|cardiac rhythm|C0232187|||C0232187|CHV;NCI;SNOMEDCT|||1  
CR|cardiac rupture|C0018813|||1|0.001|  
CR|cardiorespiratory|||1|0.056|||1|0.0014|1  
CR|cardiorrhexis|||1|  
CR|caries resistant|||1|  
CR|caries-resistant|||1|0.0017|  
CR|cartilage residue|||1|  
CR|case report|C0007320;C0085973|||1|  
CR|cathode ray|C0007443|||C0007443|CHV;MSH|||1  
CR|center of rotation|C2986818|||1|  
CR|central ray|||1|  
CR|centric relation|C0007702|||C0007702|CHV;MSH|1|0.0039|1  
CR|charge recombination|||1|0.0013|  
CR|chemoradiation|C0436307;C1559154|||C0436307;C1559154|NCI|||1  
CR|chest and right arm|||1|  
CR|chest roentgenogram|||1|

CR|chest roentgenograph|||||||1  
CR|chest roentgenography|||||||1  
CR|child-resistant|||||||1  
CR|choice reaction|||||||1  
CR|chorioretinal|||||||1  
CR|chromium|C0008574;C1445745;C2348261|||C0008574;C1445745;C2348261|AOD;CHV;CSP;  
LCH;LNC;MEDLINEPLUS;MSH;MTH;MTHSPL;NCI;NDFRT;RXNORM;SNOMEDCT;VANDF|||1  
CR|chronic rejection|||||1|0.0135|1  
CR|circadian rhythm|C0008810;C1522723|||||1|0.0041|  
CR|clinical record|||||||1  
CR|clinical research|C0008972|||C0008972|AOD;CHV;CSP;MSH;MTH;NCI|||1  
CR|closed reduction||1|0.002|||||1  
CR|clot retraction|C0009069;C0368983|||C0009069;C0368983|AOD;CHV;CSP;MSH;MTH|||1  
CR|cockroach|C0009208;C0600185|||||1|0.0018|  
CR|coefficient of repeatability|||||1|0.0014|  
CR|coefficient retention|||||||1  
CR|cognitive reserve|C2936352|||||1|0.001|  
CR|colon resection|||||||1  
CR|colonization resistance|||||1|0.0028|  
CR|colony-reared|||||||1  
CR|colorectal|C0555952|||C0555952|CHV;NCI;SNOMEDCT|||1  
CR|complement receptor|C0034793|||C0034793|CSP;MSH;MTH;NDFRT;SNOMEDCT|1|0.0094|1  
CR|complete|C0205197;C0725685|||||1|0.0182|  
CR|complete regression|||||1|0.0037|  
CR|complete remission|C0677874|1|0.032|C0677874|CHV;NCI|1|0.4169|1  
CR|complete remission rate|||||1|0.002|  
CR|complete responder|||||||1  
CR|complete responders|||||1|0.0063|  
CR|complete response|C0677874|||C0677874|CHV;NCI|||1  
CR|complete response rate|||||1|0.0027|  
CR|completely|||||1|0.0013|  
CR|composite resin|C0009570|||||1|0.0011|  
CR|compression ratio|||||1|0.0018|  
CR|computed radiographic|||||1|0.0014|  
CR|computed radiography|C1547104|||C1547104|HL7V2.5|1|0.0311|1  
CR|concentration ratios|||||1|0.0032|  
CR|concentration-response|||||1|0.002|  
CR|conditioned reflex|C0034936|||C0034936|AOD;CHV;MSH;MTH;SNOMEDCT|1|0.0048|1  
CR|conditioned reinforcement|||||1|0.001|  
CR|conditioned  
response|C0009647;C0034936|||C0009647;C0034936|AOD;CHV;NCI;SNOMEDCT|||1  
CR|conditioned reward|||||1|0.0014|  
CR|congenital rubella|C0035921|||||||1  
CR|conserved region|||||1|0.0028|  
CR|constant routine|||||||1|0.0011|  
CR|contact record|||||||1  
CR|continuous reinforcement|||||||1  
CR|contractile reserve|||||1|0.0015|  
CR|control rats|||||1|0.0015|  
CR|control region|||||1|0.0058|  
CR|controlled release|C0868939;C1707506|1|0.906|||||1  
CR|controlled respiration|||||||1  
CR|controlled response|||||||1  
CR|controlled-release|C0868939;C1707506|||||1|0.0252|  
CR|conventional radiology|||||||1|0.0011|  
CR|conversion rate|||||||1  
CR|conversion reaction|C0009946|||||||1

CR|cooling rate|||||||1  
CR|corneal reflex|C0520451|||||||1  
CR|coronary resistance|||||1|0.0013|  
CR|coronary revascularization|C0877341|||||1|0.0007|  
CR|coronary risk|||||1|0.0011|  
CR|correct response|||||||1  
CR|correlation|C1707520|||||||1  
CR|cortical reaction|||||1|0.0008|  
CR|corticoresistant|||||||1  
CR|corticosteroid-resistant|||||1|0.0013|  
CR|costa rica|C0010182|||C0010182|CHV|||  
CR|cranial|C0037303;C3163632|||||||1  
CR|cranium|C0037303;C1279062|||||||1  
CR|creamed|C0700385|||||||1  
CR|creatine and phosphocreatine|||||1|0.0031|  
CR|creatinine|C0010294;C1561535|1|0.002|C0010294;C0201975;C1561535|AOD;CHV;CSP;L  
CH;LNC;MSH;MTH;NCI;NDFRT;RXNORM;SNOMEDCT|||1  
CR|cremaster ratio|||||||1  
CR|cremasteric reflex|C0234176|||C0234176|SNOMEDCT|||  
CR|cresyl red|||||||1  
CR|critical ratio|||||||1  
CR|cross-reactive|||||1|0.0013|  
CR|crown|C0010384;C0226993;C1185616;C2700388|||||||1  
CR|crown-rump|||||1|0.0035|1  
CR|crutches|C0010397|||||||1  
CR|cycloplegic refraction|C0855713|||||||1  
CR|cysteine-rich|||||1|0.0014|  
CR|energy cost of running|||||1|0.0014|  
CR|full remission|C0677874|||C0677874|AOD|||  
CR|pCR|C0032520;C0677874|||C0677874|NCI|||  
CR|rates|||||1|0.0027|  
CR|reactivity|||||1|0.0021|  
CR|remodeling|||||1|0.0013|  
CR|resistant|C0332325;C2827757|||||1|0.0023|  
CR|rotation|C0035868;C0677597|||||1|0.0018|  
CR|serum creatinine|C0201976;C0600061|||||1|0.0206|  
CR|serum creatinine concentration|||||1|0.0011|  
CR|teratocarcinoma-derived growth factor 1|||C1420667|HUGO|||  
CSA|4-chloro-5-sulfamoylanthranilic acid|C0048170|||C0048170|MSH|||  
CSA|CHORIONIC SOMATOMAMMOTROPIN A|||C1413752|OMIM|||  
CSA|CHORIONIC SOMATOMAMMOTROPIN HORMONE 1|C1413752|||C1413752|OMIM|||  
CSA|CKN1|C0751039|||C0751039|OMIM|||  
CSA|CKN1 GENE|C1414440|||C1414440|OMIM|||  
CSA|COCKAYNE SYNDROME, TYPE A|C0751039|||C0751039|OMIM|||  
CSA|CSA|||C0751039;C1413752;C1414440|HUGO;OMIM|||  
CSA|CSA - Cyclosporin A|C0010592|||C0010592|SNOMEDCT|||  
CSA|CSA GENE|C1414440|||C1414440|OMIM|||  
CSA|CSH1|C1413752|||C1413752|HUGO;OMIM|||  
CSA|CSH1 gene|C1413752|||C1413752|HUGO;MTH|||  
CSA|CSMT|C1413752|||C1413752|HUGO;OMIM|||  
CSA|CYA - Cyclosporin|C0010592|||C0010592|SNOMEDCT|||  
CSA|CYA - Cyclosporin A|C0010592|||C0010592|SNOMEDCT|||  
CSA|CYCLOSPORINE|C0010592|||C0010592|MTHSPL;NCI;NDFRT;SPN;VANDF|||  
CSA|CYSP|C0010592|||C0010592|PDQ|||  
CSA|Canadian Standards Association|||||1|0.0028|  
CSA|Central sleep apnoea|C0520680|||||1|0.0034|  
CSA|Ciclosporin|C0010592|||C0010592|MSH;NCI;NDFRT;SNOMEDCT|||

CSA|Ciclosporin - chemical||||C0010592|SNOMEDCT|||  
CSA|Ciclosporin product|C0010592|||C0010592|SNOMEDCT|||  
CSA|Cockayne Syndrome, Group A|C0751039|||C0751039|MSH|||  
CSA|Cockayne Syndrome, Type A|C0751039|||C0751039|MSH|||  
CSA|Cockayne Syndrome, Type I|C0751039|||C0751039|MSH;MTH|||  
CSA|Cognitive Skills Assessment|||||||1  
CSA|Controlled Substances Act|||||1|0.004|1  
CSA|CsA||||C0010592|NCI;PDQ|||  
CSA|Cyclosporin|C0010592|||C0010592|MSH;NCI;NDFRT;SNOMEDCT|||  
CSA|Cyclosporin - chemical||||C0010592|SNOMEDCT|||  
CSA|Cyclosporin - chemical (substance)|||C0010592|SNOMEDCT|||  
CSA|Cyclosporin A|C0010592|||C0010592|LCH;MSH;NCI;NDFRT;SNOMEDCT|||  
CSA|Cyclosporin product|C0010592|||C0010592|SNOMEDCT|||  
CSA|Cyclosporine|C0010592|||C0010592|LNC;MSH;MTH;MTHSPL;NCI;NDFRT;RXNORM;SNOMEDC  
T;USPMG|||  
CSA|Cyclosporine (product)|C0010592|||C0010592|SNOMEDCT|||  
CSA|Cyclosporine (substance)|||C0010592|SNOMEDCT|||  
CSA|Cyclosporine A|C0010592|||C0010592|MSH;NDFRT|||  
CSA|Cyclosporine [Chemical/Ingredient]||||C0010592|NDFRT|||  
CSA|ERCC8|C1414440|||C1414440|HUGO;OMIM|||  
CSA|ERCC8 gene|C1414440|||C1414440|HUGO;MTH|||  
CSA|EXCISION-REPAIR CROSS-COMPLEMENTING, GROUP 8|C1414440|||C1414440|OMIM|||  
CSA|FLJ75407|C1413752|||C1413752|HUGO|||  
CSA|Group A Cockayne Syndrome|C0751039|||C0751039|MSH|||  
CSA|LACTOGEN, PLACENTAL|C1314785;C1413752;C1413753|||C1413752|OMIM|||  
CSA|PL||||C1413752|HUGO;OMIM|||  
CSA|Type A Cockayne Syndrome|C0751039|||C0751039|MSH|||  
CSA|Type I Cockayne Syndrome|C0751039|||C0751039|MSH|||  
CSA|analysis|C0002778;C0936012;C1524024|||||1|0.0068|  
CSA|canavaninosuccinic acid|C0054576|||C0054576|MSH|||1  
CSA|catalyzed signal amplification|||||1|0.0052|  
CSA|cell surface antigen|C0003339|||C0003339;C1325289|CHV;GO;MSH;NCI;NDFRT|||  
CSA|cell surface antigens|C0003339|||||1|0.0012|  
CSA|central sleep apnea|C0520680|||C0520680|CHV;MSH;NDFRT;SNOMEDCT|1|0.0089|1  
CSA|certified surgical assistant|||1|0.002|||||  
CSA|chemical shift anisotropy||||||1|0.016|  
CSA|chicken serum albumin||||||1|0.0046|  
CSA|childhood sexual abuse||||||1|0.0387|  
CSA|chondroitin sulfate A|C0086008||||||1  
CSA|chondroitin-4-sulfate|C0086008|||||1|0.0034|  
CSA|choriomamotropin|C1314785;C1413752|||C1413752|HUGO|||  
CSA|chorionic somatomamotropin A|||C1413752|HUGO|||  
CSA|chorionic somatomamotropin hormone 1 (placental  
lactogen)|||C1413752|HUGO|||  
CSA|chronic stable angina|C0699826|||C0699826|CHV;MSH;MTH|1|0.0037|  
CSA|ciclosporin|C0010592|||C0010592|CHV;PDQ|1|0.0061|  
CSA|ciclosporins|C0010592;C0010594|||C0010592|CHV|||  
CSA|clinical skills assessment||||||1|0.004|  
CSA|clinically significant arrhythmia||||||1  
CSA|colon-specific antigen|C0056132|||C0056132|MSH|1|0.0021|1  
CSA|colony-stimulating activity||||||1|0.105|1  
CSA|compressed spectral array|C0443187|||C0443187|SNOMEDCT|1|0.0068|  
CSA|compressed spectral assay||||||1  
CSA|computer science and applications||||||1|0.0018|  
CSA|conformational space annealing||||||1|0.0034|  
CSA|continuous spinal anaesthesia||||||1|0.0034|  
CSA|continuous spinal anesthesia||||||1|0.0052|

CSA|controlled substance analog|||||1  
CSA|coronary spastic angina|||||1|0.0061|  
CSA|corticosteroid sensitive asthma|||||1  
CSA|cross-sectional area|||||1|0.2061|1  
CSA|cycloSPORINE|C0010592|||C0010592|RXNORM|||  
CSA|cyclosporin|C0010592|||C0010592|CHV;PDQ|1|0.0697|  
CSA|cyclosporin A|C0010592|1|0.996|C0010592|CSP;PDQ|||  
CSA|cyclosporin a|C0010592|||C0010592|CHV|||  
CSA|cyclosporin-A|C0010592|||||1|0.0286|  
CSA|cyclosporine|C0010592|||C0010592|CHV;CSP;MTHSPL;NCI;PDQ|1|0.4312|  
CSA|cyclosporine a|C0010592|||C0010592|CHV|||  
CSA|cyclosporine-A|C0010592|||||1|0.0172|  
CSA|cysteine sulfonic acid|C0056878|||||1|0.0046|  
CSA|excision repair cross-complementing rodent repair deficiency,  
complementation group 8|C1414440|||C1414440|HUGO|||  
CSA|hCS-A|||C1413752|HUGO|||  
CSA|placental lactogen|C1314785;C1413752;C1413753|||C1413752|HUGO|||  
CSF|CEREBROSPINAL FLUID|C0007806;C0007807|||C0007806|NCI|||  
CSF|CF|||C0007807|MSH|||  
CSF|CSF|||C0007806;C0007807;C0009392;C0079460;C0376561|CHV;CSP;FMA;LNC;MSH;NCI;  
UWDA|||  
CSF|CSF - Cerebrospinal fluid|C0007806|||C0007806|SNOMEDCT|||  
CSF|CSF Recombinant|||C0376561|NDFRT|||  
CSF|CSF-2|C0079460;C1150621|||C0079460|MSH;NDFRT|||  
CSF|CSF-GM|C0079460|||C0079460|MSH;NDFRT;SNOMEDCT|||  
CSF|CSF2|C0079460;C1332791|||C0079460|NCI|||  
CSF|Cell-Growth Inducer, Myeloid|C0009392|||C0009392|MSH|||  
CSF|Cell-Stimulating Factor, Histamine-Producing|C0079460|||C0079460|MSH|||  
CSF|Cerebral Spinal Fluid|C0007806|||C0007806|HL7V2.5;NCI|||  
CSF|Cerebral spinal fluid|C0007806|||C0007806|LNC|||  
CSF|Cerebrospinal Fluid|C0007806;C0007807|||C0007806|MSH;MTH;NCI|||  
CSF|Cerebrospinal Fluids|C0007806|||C0007806|MSH|||  
CSF|Cerebrospinal fluid|C0007806;C0007807|||C0007806|FMA;LCH;SNOMEDCT;UWDA|||  
CSF|Cerebrospinal fluid (substance)|||C0007806|SNOMEDCT|||  
CSF|Cerebrospinal fluid, NOS|C0007806;C0007807|||C0007806|SNOMEDCT|||  
CSF|Colony Stimulating Factor|C0009392;C0079460|||C0009392|MSH;NCI;NDFRT|||  
CSF|Colony Stimulating Factor 2|C0079460;C1332791|||C0079460|NCI|||  
CSF|Colony Stimulating Factor, Granulocyte  
Macrophage|C0079460;C0376563;C1149401;C1332791|||C0079460|MSH|||  
CSF|Colony Stimulating Factor, Granulocyte-  
Macrophage|C0079460;C0376563;C1149401;C1332791|||C0079460|NCI|||  
CSF|Colony Stimulating Factors|C0009392|||C0009392|MSH|||  
CSF|Colony stimulating factor|C0009392;C0079460|||C0009392|SNOMEDCT|||  
CSF|Colony stimulating factor (substance)|||C0009392|SNOMEDCT|||  
CSF|Colony stimulating factor preparation|C0009392|||C0009392|SNOMEDCT|||  
CSF|Colony stimulating factor preparation (product)|||C0009392|SNOMEDCT|||  
CSF|Colony stimulating factor preparation (substance)|||C0009392|SNOMEDCT|||  
CSF|Colony stimulating factors|C0009392|||C0009392|SNOMEDCT|||  
CSF|Colony-Stimulating  
Factor|C0009392;C0079460|||C0009392;C0079460|MSH;NCI;NDFRT|||  
CSF|Colony-Stimulating Factor, Granulocyte-  
Macrophage|C0079460;C0376563;C1149401;C1332791|||C0079460|MSH;NDFRT|||  
CSF|Colony-Stimulating Factors|C0009392|||C0009392|MSH;MTH;NCI;NDFRT|||  
CSF|Colony-Stimulating Factors [Chemical/Ingredient]|||C0009392|NDFRT|||  
CSF|Colony-Stimulating Factors, Recombinant|C0376561|||C0376561|NDFRT|||  
CSF|Colony-Stimulating Factors, Recombinant  
[Chemical/Ingredient]|||C0376561|NDFRT|||

CSF|Colony-stimulating factor|C0009392;C0079460|||C0009392|SNOMEDCT|1|0.0565|  
CSF|Colony-stimulating factor (substance)|||C0009392|SNOMEDCT|||  
CSF|Colony-stimulating factor 2|C0079460;C1332791|||C0079460|MSH;NDFRT|||  
CSF|Colony-stimulating factor, NOS|C0009392;C0079460|||C0009392|SNOMEDCT|||  
CSF|Colony-stimulating factor, granulocyte-  
macrophage|C0079460;C0376563;C1149401;C1332791|||C0079460|SNOMEDCT|||  
CSF|Colony-stimulating factor, granulocyte-macrophage  
(substance)|||C0079460|SNOMEDCT|||  
CSF|Fluid, Cerebrospinal|C0007806;C0007807|||C0007806|MSH|||  
CSF|Fluids, Cerebrospinal|C0007806|||C0007806|MSH|||  
CSF|GM CSF|C0079460;C0376563|||C0079460|NCI;PDQ|||  
CSF|GM-CSF|C0079460;C0376563|||C0079460|MSH;NCI;NDFRT;SNOMEDCT|||  
CSF|GMCSF|C0079460;C0376563;C2825896|||C0079460|CSP;MSH;NCI|||  
CSF|GMCSF (granulocyte macrophage colony stimulating factor)|||C0079460|CSP|||  
CSF|GRANULOCYTE MACROPHAGE COLONY A STIMULATING FACTOR|||C0079460|MSH|||  
CSF|Granulocyte Macrophage Colony Stimulating  
Factor|C0079460;C0376563;C1149401;C1332791|||C0079460|MSH;NCI|||  
CSF|Granulocyte Macrophage Colony-Stimulating  
Factor|C0079460;C0376563;C1149401;C1332791|||C0079460|NCI|||  
CSF|Granulocyte macrophage colony stimulating  
factor|C0079460;C0376563;C1149401;C1332791|||C0079460|SNOMEDCT|||  
CSF|Granulocyte-Macrophage Colony Stimulating  
Factor|C0079460;C0376563;C1149401;C1332791|||C0079460|NCI|||  
CSF|Granulocyte-Macrophage Colony-Stimulating  
Factor|C0079460;C0376563;C1149401;C1332791|||C0079460|MSH;MTH;NCI;NDFRT|||  
CSF|Granulocyte-Macrophage Colony-Stimulating Factor  
[Chemical/Ingredient]|||C0079460|NDFRT|||  
CSF|Histamine Producing Cell Stimulating Factor|C0079460|||C0079460|MSH|||  
CSF|Histamine-Producing Cell-Stimulating Factor|C0079460|||C0079460|MSH;NDFRT|||  
CSF|In Cerebrospinal Fluid|C0007807|||C0007807|MTH|||  
CSF|Inducer, Myeloid Cell-Growth|C0009392|||C0009392|MSH|||  
CSF|Liquor cerebrospinalis|C0007806|||C0007806|FMA|||  
CSF|MGI 1 Protein|C0009392|||C0009392|MSH|||  
CSF|MGI-1|C0009392|||C0009392|MSH;NCI;NDFRT|||  
CSF|MGI-1 Protein|C0009392|||C0009392|MSH;NCI;NDFRT|||  
CSF|Myeloid Cell Growth Inducer|C0009392|||C0009392|MSH|||  
CSF|Myeloid Cell-Growth Inducer|C0009392|||C0009392|MSH;NCI;NDFRT|||  
CSF|Recombinant Colony Stimulating Factor|C0376561|||C0376561|NCI|||  
CSF|Recombinant Colony-Stimulating Factors|C0376561|||C0376561|MTH;NDFRT|||  
CSF|Recombinant Hematopoietic Colony-stimulating  
Factor|C0376561|||C0376561|NCI|||  
CSF|Spinal Fluid|C0007806|||C0007806|CST|||  
CSF|Spinal fluid|C0007806|||C0007806|SNOMEDCT|||  
CSF|Spinal fluid (substance)|||C0007806|SNOMEDCT|||  
CSF|TC-GM-CSF|C0079460|||C0079460|MSH;NDFRT|||  
CSF|Tumor Cell Human GM Colony Stimulating Factor|C0079460|||C0079460|MSH|||  
CSF|Tumor-Cell Human GM Colony-Stimulating  
Factor|C0079460|||C0079460|MSH;NDFRT|||  
CSF|cancer family syndrome|C2931592|||C2931592|MSH|||1  
CSF|cerebrospinal|||||1|0.0027|  
CSF|cerebrospinal  
fluid|C0007806;C0007807|1|1.000|C0007806;C0007807|AOD;CHV;CSP;FMA;LCH;MSH;MTH;NC  
I;SNOMEDCT;UWDA|1|0.9145|1  
CSF|cerebrospinal fluid (CSF)|C0007806;C0007807|||C0007806|CHV|||  
CSF|cerebrospinal fluid samples|||||1|0.0007|  
CSF|circumferential shortening fraction|||||1|  
CSF|classical swine fever|C0019841|||||1|0.0109|

CSF|colony stimulating factor|C0009392;C0079460|||C0009392|CHV;CSP;LNC;MSH;NCI;NDFRT;SNOMEDCT|||  
CSF|colony stimulating factor (CSF)|C0009392;C0079460|||C0009392|CHV|||  
CSF|colony stimulating factors|C0009392|||C0009392|CHV|||  
CSF|colony-stimulating factor|C0009392;C0079460|||C0009392|CHV;NCI|||1  
CSF|colony-stimulating factor(s)|||||1|0.0005|  
CSF|colony-stimulating factors|C0009392|||C0009392|AOD|||  
CSF|contoured femoral stem||||||1  
CSF|contrast sensitivity function|||||1|0.0073|  
CSF|coronary sinus blood flow|||||1|0.001|  
CSF|coronary sinus flow|||||1|0.0013|1  
CSF|cytostatic factor|C0072454|||||1|0.0045|  
CSF|gm csf|C0079460;C0376563|||C0079460|CHV|||  
CSF|gm-cfs|C0079460|||C0079460|CHV|||  
CSF|gm-csf|C0079460;C0376563|||C0079460|CHV|||  
CSF|gmcsf|C0079460;C0376563;C2825896|||C0079460|CHV|||  
CSF|granulocyte macrophage colony stimulating factor|C0079460;C0376563;C1149401;C1332791|||C0079460|CSP|||  
CSF|granulocyte macrophage colony-stimulating factor|C0079460;C0376563;C1149401;C1332791|||C0079460|PDQ|||  
CSF|granulocyte-macrophage colony stimulating factor|C0079460;C0376563;C1149401;C1332791|||C0079460|PDQ|||  
CSF|granulocyte-macrophage colony-stimulating factor|C0079460;C0376563;C1149401;C1332791|||C0079460|NCI;PDQ|||  
CSF|histamine producing cell stimulating factor|C0079460|||C0079460|CSP|||  
CSF|spinal fluid|C0007806|||C0007806|CSP|||  
CTA|CT angiography|C1536105|||||1|0.2101|  
CTA|CT during arteriography|||||1|0.0012|  
CTA|CT hepatic arteriography|||||1|0.007|  
CTA|Cell Transit Analyzer|||||1|0.0117|  
CTA|Computed tomographic arteriography|||||1|0.0153|  
CTA|Computed tomographic arthrography|||||1|0.0059|  
CTA|antigens|C0003320|||||1|0.0129|  
CTA|cellulose triacetate|C0055048|||||1|0.0317|  
CTA|chemotactic activity||||||1  
CTA|chemotherapeutic agent|C0003392;C0729502|||C0003392;C0729502|CHV;MTH;NCI;SNOMEDCT|||  
CTA|chromotropic acid|C0055644||||||1  
CTA|clear to auscultation||1|0.792||||1  
CTA|composite tissue allograft|||||1|0.0106|  
CTA|computed tomographic angiographic|||||1|0.007|  
CTA|computed tomographic angiography||1|0.200||1|0.1315|1  
CTA|computed tomography angiography|C1536105|||C1536105|SNOMEDCT|1|0.0704|  
CTA|computed tomography of abdomen|C0412620||||||1  
CTA|conditioned taste aversion|C0815105|||C0815105|AOD;CHV;GO|1|0.4472|  
CTA|conditioned taste avoidance|||||1|0.0094|  
CTA|congenital trigeminal anesthesia||||||1  
CTA|cortical taste area|||||1|0.0129|  
CTA|cuff tear arthropathy||||||1  
CTA|cystine trypticase agar||||||1  
CTA|cytoplasmic tubular aggregate||||||1  
CTA|cytotoxic activity|||||1|0.0094|  
CTA|cytotoxic assay||||||1  
CTA|menses|C0025344;C0559892||||||1  
CTA|task analysis|C0556033|||||1|0.0059|  
CT|BEHAVIOR THER COGNITIVE|||C0009244|MSH|||  
CT|Behavior Therapies, Cognitive|C0009244|||C0009244|MSH|||

CT|Behavior Therapy, Cognitive|C0009244|||C0009244|MSH|||  
CT|C-terminal|C1707271|||1|0.0004|  
CT|C.A.T. scan NOS|C0040405|||C0040405|MTHICD9|||  
CT|CAF|||C0007673|NCI|||  
CT|CALC1|C1367551;C1705783|||C1367551;C1705783|NCI;OMIM|||  
CT|CALCA|C1367551;C1705783|||C1367551;C1705783|HUGO;NCI;OMIM|||  
CT|CALCA Gene|C1367551|||C1367551|NCI|||  
CT|CALCA gene|C1367551|||C1367551|HUGO;MTH|||  
CT|CALCA wt Allele|C1705783|||C1705783|MTH;NCI|||  
CT|CALCITONIN|C0006668;C0770558;C1704385;C2825090|||C1367551|OMIM|||  
CT|CALCITONIN GENE-RELATED PEPTIDE|C0006669;C1367551|||C1367551|OMIM|||  
CT|CALCITONIN/CALCITONIN-RELATED POLYPEPTIDE, ALPHA|||C1367551|OMIM|||  
CT|CAT|C0007450;C0325090;C0524517|||C0040405|AOD;NCI|||  
CT|CAT - Computerised axial tomography|C0040405|||C0040405|SNOMEDCT|||  
CT|CAT - Computerized axial tomography|C0040405|||C0040405|SNOMEDCT|||  
CT|CAT Scan|C0040405;C1547980|||C0040405|NCI|||  
CT|CAT Scan, X Ray|C0040405|||C0040405|MSH|||  
CT|CAT Scan, X-Ray|C0040405|||C0040405|MSH|||  
CT|CAT Scans|C0040405|||C0040405|MEDLINEPLUS|||  
CT|CAT Scans, X-Ray|C0040405|||C0040405|MSH|||  
CT|CAT scan|C0040405;C1547980|||C0040405|AOD;CHV;CSP;MEDLINEPLUS;NCI;SNOMEDCT|||  
CT|CAT scan - NOS|C0040405;C1547980|||C0040405|SNOMEDCT|||  
CT|CAT scan - NOS (procedure)|C0040405|||C0040405|SNOMEDCT|||  
CT|CAT scan, NOS|C0040405;C1547980|||C0040405|SNOMEDCT|||  
CT|CBT|C0009244;C1412770|||C0009244|CSP;NCI|||  
CT|CBT - Cognitive - behavior therapy|C0009244|||C0009244|SNOMEDCT|||  
CT|CBT - Cognitive - behaviour therapy|C0009244|||C0009244|SNOMEDCT|||  
CT|CENTRAL AFRICAN REPUBLIC|C0007673|||C0007673|NCI|||  
CT|CF|||C0007673|NCI|||  
CT|CGRP|||C1367551;C1705783|NCI;OMIM|||  
CT|CGRP-I|C1705783|||C1705783|NCI|||  
CT|CGRP1|C1705783|||C1705783|NCI|||  
CT|CHOLINE-PHOSPHATE CYTIDYLYLTRANSFERASE|C0311989;C1418396|||C1418396|OMIM|||  
CT|COGNITION THER|||C0009244|MSH|||  
CT|COGNITIVE BEHAVIOR THER|||C0009244|MSH|||  
CT|COGNITIVE PSYCHOTHER|||C0009244|MSH|||  
CT|COGNITIVE THER|||C0009244|MSH|||  
CT|CONTRA|||C0079164|MSH|||  
CT|CT|||C0007673;C0009244;C0009778;C0010377;C0040405;C0079164;C1367551;C1418396  
;C1705783|HUGO;LNC;MSH;NCI;OMIM;PDQ|||  
CT|CT - Computerised tomography|C0040405|||C0040405|SNOMEDCT|||  
CT|CT - Computerized tomography|C0040405|||C0040405|SNOMEDCT|||  
CT|CT SCAN|C0040405;C1547980|||C0040405|NCI|||  
CT|CT Scan, X Ray|C0040405|||C0040405|MSH|||  
CT|CT Scan, X-Ray|C0040405|||C0040405|MSH|||  
CT|CT Scans|C0040405|||C0040405|MEDLINEPLUS|||  
CT|CT Scans, X-Ray|C0040405|||C0040405|MSH|||  
CT|CT X Ray|C0040405|||C0040405|MSH|||  
CT|CT X Rays|C0040405|||C0040405|MSH|||  
CT|CT XRAY|||C0040405|MSH|||  
CT|CT scan|C0040405;C1547980|||C0040405|AOD;CHV;CSP;NCI|||  
CT|CT scan without IV contrast|C0040405|||C0040405|SNOMEDCT|||  
CT|CT scans|C0040405|||C0040405|CHV|||  
CT|CTPCT|C1418396|||C1418396|HUGO;OMIM|||  
CT|CYTIDYLYLTRANSFERASE, CTP-PHOSPHOCHOLINE|C0311989;C1418396|||C1418396|OMIM|||  
CT|Calcitonin/Calcitonin-Related Polypeptide, Alpha Gene|||C1367551|NCI|||  
CT|Calcitonin/Calcitonin-Related Polypeptide, Alpha wt Allele|||C1705783|NCI|||

CT|Cardiac transplantation|C0018823|||||1|0.0004|  
CT|Catalase|C0007367;C1413138|||||1|0.0004|  
CT|Category Test|C0589061|||||1|  
CT|Central African Republic|C0007673|||C0007673|AOD;LCH;MSH;MTH;NCI;SNOMEDCT|||  
CT|Central African Republic (geographic location)|||C0007673|SNOMEDCT|||  
CT|Cerebral toxoplasmosis|C0085315|||||1|0.0003|  
CT|Chlamydia trachomatis|C0008151|||||1|0.0075|1  
CT|Cholera enterotoxin|C0116227|||||1|0.0013|  
CT|Cognition Therapies|C0009244|||C0009244|MSH|||  
CT|Cognition Therapy|C0009244|||C0009244|MSH|||  
CT|Cognitive - behavior therapy|C0009244|||C0009244|SNOMEDCT|||  
CT|Cognitive - behavior therapy (procedure)|||C0009244|SNOMEDCT|||  
CT|Cognitive - behavior therapy (regime/therapy)|||C0009244|SNOMEDCT|||  
CT|Cognitive - behaviour therapy|C0009244|||C0009244|SNOMEDCT|||  
CT|Cognitive - behavioural therapy (regime/therapy)|||C0009244|SNOMEDCT|||  
CT|Cognitive Behavior Therapies|C0009244|||C0009244|MSH|||  
CT|Cognitive Behavior Therapy|C0009244|||C0009244|MSH;NCI|||  
CT|Cognitive Psychotherapies|C0009244|||C0009244|MSH|||  
CT|Cognitive Psychotherapy|C0009244|||C0009244|MSH|||  
CT|Cognitive Therapies|C0009244|||C0009244|MSH|||  
CT|Cognitive Therapy|C0009244|||C0009244|MSH;MTH|||  
CT|Cognitive and behavioral therapy|||C0009244|SNOMEDCT|||  
CT|Cognitive and behavioral therapy (procedure)|||C0009244|SNOMEDCT|||  
CT|Cognitive and behavioral therapy (regime/therapy)|||C0009244|SNOMEDCT|||  
CT|Cognitive and behavioural therapy|||C0009244|SNOMEDCT|||  
CT|Cognitive approach|C0009244|||C0009244|SNOMEDCT|||  
CT|Cognitive therapy|C0009244|||C0009244|SNOMEDCT|||  
CT|Cognitive therapy (procedure)|||C0009244|SNOMEDCT|||  
CT|Cognitive therapy (regime/therapy)|||C0009244|SNOMEDCT|||  
CT|Cognitive therapy approach|C0009244|||C0009244|SNOMEDCT|||  
CT|Cognitive-behavioral therapy approach|C0009244|||C0009244|SNOMEDCT|||  
CT|Cognitive-behaviour therapy|C0009244|||C0009244|SNOMEDCT|||  
CT|Cognitive-behavioural therapy approach|C0009244|||C0009244|SNOMEDCT|||  
CT|Computed Tomography|C0040405;C1552357|||C0040405|NCI|||  
CT|Computed Tomography, Transmission|C0040405|||C0040405|MSH|||  
CT|Computed Tomography, X Ray|C0040405|||C0040405|MSH|||  
CT|Computed Tomography, X-Ray|C0040405|||C0040405|MSH|||  
CT|Computed Tomography, Xray|C0040405|||C0040405|MSH|||  
CT|Computed X Ray Tomography|C0040405|||C0040405|MSH|||  
CT|Computed X-Ray Tomography|C0040405|||C0040405|MSH|||  
CT|Computed axial tomography|C0040405|||C0040405|HL7V3.0;SNOMEDCT|||  
CT|Computed tomographic scan|||||1|0.0009|  
CT|Computed tomographic scanning|||||1|0.0004|  
CT|Computed tomography|C0040405;C1552357|||C0040405|HL7V2.5;SNOMEDCT|||  
CT|Computed tomography (procedure)|||C0040405|SNOMEDCT|||  
CT|Computed tomography scan - NOS|||C0040405|SNOMEDCT|||  
CT|Computed tomography scan - NOS (procedure)|||C0040405|SNOMEDCT|||  
CT|Computer-Tomography|||||1|0.0004|  
CT|Computerised axial tomography|C0040405|||C0040405|SNOMEDCT|||  
CT|Computerised axial tomography scan - NOS|||C0040405|SNOMEDCT|||  
CT|Computerised tomograph scan|C0040405|||C0040405|SNOMEDCT|||  
CT|Computerised tomography|C0040405|||C0040405|SNOMEDCT|||  
CT|Computerised transaxial tomography|C0040405|||C0040405|SNOMEDCT|||  
CT|Computerized Axial Tomography|C0040405|||C0040405|NCI|||  
CT|Computerized Tomography|C0040405|||C0040405|NCI|||  
CT|Computerized Tomography, X Ray|C0040405|||C0040405|MSH|||  
CT|Computerized Tomography, X-Ray|C0040405|||C0040405|MSH|||

CT|Computerized axial tomography|C0040405|||C0040405|SNOMEDCT|||  
CT|Computerized axial tomography (procedure)|||C0040405|SNOMEDCT|||  
CT|Computerized axial tomography scan - NOS|||C0040405|SNOMEDCT|||  
CT|Computerized axial tomography scan - NOS (procedure)|||C0040405|SNOMEDCT|||  
CT|Computerized axial tomography, NOS|C0040405|||C0040405|SNOMEDCT|||  
CT|Computerized tomograph scan|C0040405|||C0040405|SNOMEDCT|||  
CT|Computerized tomography|C0040405|||C0040405|SNOMEDCT|||  
CT|Computerized tomography without IV contrast|C0040405|||C0040405|SNOMEDCT|||  
CT|Computerized transaxial tomography|C0040405|||C0040405|SNOMEDCT|||  
CT|Computerized transaxial tomography without IV contrast|C0040405|||C0040405|SNOMEDCT|||  
CT|Computerized transaxial tomography, NOS|C0040405|||C0040405|SNOMEDCT|||  
CT|Connecticut|C0009778|||C0009778|AOD;LCH;MSH;MTH;NCI;SNOMEDCT|1|0.0004|  
CT|Connecticut (geographic location)|||C0009778|SNOMEDCT|||  
CT|Coombs test|C0009961|||1|||  
CT|Crotoxin|C0010377|||C0010377|MSH;MTH;NCI;NDFRT|||  
CT|Crotoxin [Chemical/Ingredient]|||C0010377|NDFRT|||  
CT|EMI scan|||C0040405|CSP|||  
CT|KC|C0022575;C1705783|||C1705783|NCI|||  
CT|PCYT1|C1418396|||C1418396|OMIM|||  
CT|PCYT1A|C1418396|||C1418396|HUGO;OMIM|||  
CT|PCYT1A gene|C1418396|||C1418396|HUGO;MTH|||  
CT|PHOSPHATE CYTIDYLYLTRANSFERASE 1, CHOLINE|C1418396|||C1418396|OMIM|||  
CT|PHOSPHATE CYTIDYLYLTRANSFERASE 1, CHOLINE, ALPHA ISOFORM|C1418396|||C1418396|OMIM|||  
CT|PSYCHOTHER COGNITIVE|||C0009244|MSH|||  
CT|Psychotherapies, Cognitive|C0009244|||C0009244|MSH|||  
CT|Psychotherapy - cognitive|||C0009244|SNOMEDCT|||  
CT|Psychotherapy - cognitive (procedure)|||C0009244|SNOMEDCT|||  
CT|Psychotherapy - cognitive (regime/therapy)|||C0009244|SNOMEDCT|||  
CT|Psychotherapy, Cognitive|C0009244|||C0009244|MSH|||  
CT|Scan, X-Ray CAT|C0040405|||C0040405|MSH|||  
CT|Scan, X-Ray CT|C0040405|||C0040405|MSH|||  
CT|Scans, X-Ray CAT|C0040405|||C0040405|MSH|||  
CT|Scans, X-Ray CT|C0040405|||C0040405|MSH|||  
CT|THER COGNITION|||C0009244|MSH|||  
CT|THER COGNITIVE|||C0009244|MSH|||  
CT|THER COGNITIVE BEHAVIOR|||C0009244|MSH|||  
CT|TOMOGRAPHY TRANSM COMPUTED|||C0040405|MSH|||  
CT|Therapies, Cognition|C0009244|||C0009244|MSH|||  
CT|Therapies, Cognitive|C0009244|||C0009244|MSH|||  
CT|Therapies, Cognitive Behavior|C0009244|||C0009244|MSH|||  
CT|Therapy, Cognition|C0009244|||C0009244|MSH|||  
CT|Therapy, Cognitive|C0009244|||C0009244|MSH|||  
CT|Therapy, Cognitive Behavior|C0009244|||C0009244|MSH|||  
CT|Tomodensitometry|C0040405|||C0040405|MSH|||  
CT|Tomographies, Computed X-Ray|C0040405|||C0040405|MSH|||  
CT|Tomography, Computed X-Ray|C0040405|||C0040405|MSH|||  
CT|Tomography, Transmission Computed|C0040405|||C0040405|MSH|||  
CT|Tomography, X Ray Computed|C0040405|||C0040405|MSH|||  
CT|Tomography, X Ray Computer Assisted|C0040405|||C0040405|MSH|||  
CT|Tomography, X Ray Computerized|C0040405|||C0040405|MSH|||  
CT|Tomography, X-Ray Computed|C0040405|||C0040405|MSH|||  
CT|Tomography, X-Ray Computer Assisted|C0040405|||C0040405|MSH|||  
CT|Tomography, X-Ray Computerized|C0040405|||C0040405|MSH|||  
CT|Tomography, Xray Computed|C0040405|||C0040405|MSH|||  
CT|Transmission Computed Tomography|C0040405|||C0040405|MSH|||

CT|Ubangi-Shari|C0007673|||C0007673|MSH|||  
CT|X Ray Computer Assisted Tomography|C0040405|||C0040405|MSH|||  
CT|X Ray Computerized Tomography|C0040405|||C0040405|MSH|||  
CT|X Ray Tomography, Computed|C0040405|||C0040405|MSH|||  
CT|X Ray, CT|C0040405|||C0040405|MSH|||  
CT|X Rays, CT|C0040405|||C0040405|MSH|||  
CT|X-Ray CAT Scan|C0040405|||C0040405|MSH|||  
CT|X-Ray CAT Scans|C0040405|||C0040405|MSH|||  
CT|X-Ray CT Scan|C0040405|||C0040405|MSH|||  
CT|X-Ray CT Scans|C0040405|||C0040405|MSH|||  
CT|X-Ray Computed Tomography|C0040405|||C0040405|MSH;MTH|||  
CT|X-Ray Computer Assisted Tomography|C0040405|||C0040405|MSH|||  
CT|X-Ray Computerized Tomography|C0040405|||C0040405|MSH|||  
CT|X-Ray Tomography, Computed|C0040405|||C0040405|MSH|||  
CT|Xray Computed Tomography|C0040405|||C0040405|MSH|||  
CT|alone|C0205171;C0439044;C0679994|||1|0.0003|  
CT|alpha-chymotrypsin|C0764105|||1|0.0005|  
CT|assisted computer tomography|C0040405|||C0040405|CHV|||  
CT|behavioral cognitive therapy|C0009244|||C0009244|CHV|||  
CT|behaviour cognitive therapy|C0009244|||C0009244|CHV|||  
CT|c a t scan|C0040405|||C0040405|CHV|||  
CT|c.a.t. scan|C0040405|||C0040405|CHV|||  
CT|calcitonin|C0006668;C0770558;C1704385;C2825090|||C0006668;C0201924;C0770558;C1367551;C1704385;C2825090|AOD;CHV;CSP;FMA;HUGO;LCH;LNC;MSH;MTH;NCI;NDFRT;OMIM;PDQ;SNOMEDCT;VANDF|||1  
CT|calcitonin-related polypeptide alpha|||C1367551|HUGO|||  
CT|calf tenderness|C0238883|||1  
CT|calf testis|||1  
CT|calf thymus|||1|0.0017|  
CT|cancer/testis|C0153594|||1|0.0028|  
CT|carbon  
tetrachloride|C0007022|||C0007022|AOD;CHV;CSP;LCH;LNC;MSH;MTH;NCI;NDFRT;SNOMEDCT|1|0.0017|  
CT|carboxyl terminal|||1  
CT|carboxyl terminus|||1|0.0003|  
CT|carboxyl-terminal|||1|0.0007|  
CT|carcinoid tumor|C0007095|||C0007095|CHV;MSH;MTH;NCI;NDFRT;SNOMEDCT|||  
CT|cardiac  
tamponade|C0007177|||C0007177|AOD;CHV;COSTAR;CST;ICD9CM;LCH;MSH;NCI;NDFRT;QMR;SNOMEDCT|1|0.0004|1  
CT|cardiac transplantation|C0018823|||C0018823|CHV;MSH;NCI|||  
CT|cardiothoracic|||1|0.002|||1  
CT|carotid tracing|||1  
CT|carpal tunnel|C0007286;C0225091;C1269543|||1  
CT|cat procedure scan|C0040405|||C0040405|CHV|||  
CT|cat scan procedure|C0040405|||C0040405|CHV|||  
CT|cat scanning|C0040405|||C0040405|CHV|||  
CT|cat scans|C0040405|||C0040405|CHV|||  
CT|catalase|C0007367;C1413138|||C0007367;C1413138|AOD;CHV;CSP;HUGO;LCH;LNC;MSH;MTH;NCI;NDFRT;OMIM;RXNORM;SNOMEDCT;VANDF|||  
CT|cationic trypsinogen|C1418965|||1  
CT|cats scan|||C0040405|CHV|||  
CT|catting|C0040405;C0325089|||C0040405|CHV|||  
CT|celiac trunk|C0007569|||C0007569|CHV;FMA;SNOMEDCT;UWDA|1|0.0003|  
CT|cell therapy|C0302189|||1  
CT|cellulose triacetate|C0055048|||C0055048|MSH|1|0.0003|1  
CT|census tract|C1317843;C1547690|||1

CT|center thickness|||||||1  
CT|central tendon|C0230162|||||1|0.0002|  
CT|cerebral thrombosis|C0079102;C0795687|||||||1  
CT|cerebral toxoplasmosis|C0085315|||C0085315|CHV;MSH;NDFRT;SNOMEDCT|||  
CT|cerebral tumor|C1263885|||||||1  
CT|cervical traction|C0556664|||||||1  
CT|cervicothoracic|C0450195|||||||1  
CT|charge transport|||||||1|0.0003|  
CT|charge-transfer|||||||1|0.0044|  
CT|chemotaxis|C0008018|||||||1  
CT|chemotherapy|C0013216;C0013217;C0392920|||C0013216;C0013217;C0392920|AOD;CCS;  
CHV;CSP;LCH;LNC;MEDLINEPLUS;MSH;NCI;PDQ;SNOMEDCT|||1  
CT|chest  
tube|C0008034|||C0008034;C1549530;C1550230|CHV;HL7V2.5;LNC;MSH|1|0.0003|1  
CT|chlamydia|C0008148|||||1|0.0003|  
CT|chloramine-T|C0055332|||||1|0.0011|  
CT|cholera toxin|C0008356|||C0008356|CHV;CSP;MSH;NCI;NDFRT;SNOMEDCT|1|0.0346|1  
CT|cholesterol, total|C0543421;C1445957|||||||1  
CT|chorda  
tympani|C0008483;C1269597|||C0008483;C1269597|CSP;FMA;SNOMEDCT;UWDA|1|0.0035|  
CT|chorda tympani nerve|C0008483|||||1|0.0009|  
CT|chordae tendineae|C0008484;C1305731|||||||1  
CT|chronic  
thyroiditis|C0242520;C0677607;C2936918|||C0242520;C0677607|CHV;COSTAR;MTH;SNOMED  
CT|||1  
CT|chronic tonsillitis|C0149517|||C0149517|CHV;ICD9CM;SNOMEDCT|1|0.0004|  
CT|chymotrypsin|C0008742|||C0008742|AOD;CHV;CSP;LCH;LNC;MSH;MTH;NCI;NDFRT;RXNORM  
;SNOMEDCT;VANDF|1|0.0005|1  
CT|circadian time|||||||1|0.0037|  
CT|circulation time|||||||1  
CT|classic technique|||||||1  
CT|clinical  
trial|C0008976;C1096775|||C0008976;C1096775;C1552009|AOD;CHV;CSP;HL7V2.5;HL7V3.0  
;MSH;NCI|1|0.0004|  
CT|closed thoracotomy|||||||1  
CT|closure time|||||||1|0.001|  
CT|clotting time|C0368930|||C0368930|CHV;LNC|||1  
CT|coagulation time|C0368930|||||||1  
CT|coal  
tar|C0009137|||C0009137|CHV;MSH;MTH;MTHSPL;NCI;NDFRT;RXNORM;SNOMEDCT;VANDF|||  
CT|coated tablet|C1273642|||||||1  
CT|cobra toxin|||||||1  
CT|cognitive and behavioral therapy|||C0009244|CHV|||  
CT|cognitive behavior modification|C0009244|||C0009244|AOD;CSP|||  
CT|cognitive behavior therapy|C0009244|||C0009244|AOD;CHV;CSP;NCI|||  
CT|cognitive behavioral therapy|C0009244|||C0009244|CHV|||  
CT|cognitive behaviour therapy|C0009244|||C0009244|CHV|||  
CT|cognitive behavioural therapy|C0009244|||C0009244|CHV|||  
CT|cognitive psychotherapy|C0009244|||C0009244|CHV|||  
CT|cognitive therapies|C0009244|||C0009244|CHV|||  
CT|cognitive  
therapy|C0009244|||C0009244|AOD;CHV;CSP;MSH;MTH;NCI;SNOMEDCT|1|0.0027|1  
CT|coil test|||||||1  
CT|collecting  
tubule|C0022675;C1280366|||C0022675;C1280366|CHV;SNOMEDCT;UWDA|1|0.0005|1  
CT|combined tumor|||||||1  
CT|compliance|C0009563;C1321605|||||1|0.0008|

CT|compressed tablet|||||1  
CT|computed axial tomography|C0040405|||C0040405|CHV;CSP|||  
CT|computed tomogram|||||1|0.0036|  
CT|computed tomograph|||||1|0.0008|  
CT|computed tomographic|||||1|0.1414|  
CT|computed  
tomography|C0040405;C1552357|1|0.998|C0040405;C1552357|CHV;HL7V2.5;HL7V3.0;NCI;P  
DQ;SNOMEDCT|1|0.6452|1  
CT|computed tomography scan|||||1|0.001|  
CT|computed tomography scanning|||||1|0.0003|  
CT|computed tomography x rays|C0040405|||C0040405|CHV|||  
CT|computed tomograpy|||||1|0.0003|  
CT|computed x-ray tomography|C0040405|||C0040405|AOD|||  
CT|computer assisted tomography|C0040405|||C0040405|AOD|||  
CT|computerised tomography|C0040405|||C0040405|CHV|||  
CT|computerized axial tomography|C0040405|||C0040405|CHV;NCI|||  
CT|computerized tomogram|||||1|0.0009|  
CT|computerized tomograph|||||1|0.0003|  
CT|computerized tomographic|||||1|0.0128|  
CT|computerized tomography|C0040405|||C0040405|AOD;CHV;NCI;SNOMEDCT|1|0.0935|1  
CT|computertomography|||||1|0.0003|  
CT|computing tomography|C0040405|||C0040405|CHV|||  
CT|concentration|C0086045;C1446561|||||1|0.0006|  
CT|concentration-time product|||||1  
CT|condensed tannin|C0072018;C0919289|||C0072018;C0919289|MSH;NCI;NDFRT|||  
CT|condensed tannins|C0919289|||||1|0.0007|  
CT|conduction time|||||1|0.0011|  
CT|congenital Toxoplasmosis|C0040560|||||1|0.0003|  
CT|congenital  
toxoplasmosis|C0040560|||C0040560|CHV;MSH;MTHICD9;NCI;NDFRT;SNOMEDCT|||  
CT|connecticut|C0009778|||C0009778|CHV|||  
CT|connective  
tissue|C0009780|||C0009780|AOD;CHV;CSP;FMA;MSH;MTH;NCI;SNOMEDCT;UWDA|1|0.0013|1  
CT|conservative treatment|||||1|0.0006|  
CT|continue treatment|||||1  
CT|continuous-flow tub|||||1  
CT|contraction time|||||1  
CT|contraindications|C0079164|||C0079164|MSH|||  
CT|contraindications aspect|C0079164|||C0079164|MTH|||  
CT|control|C0009932;C0243148;C1550141;C1882979;C2587213|||C0009932;C0243148;C030  
8718;C1547100;C1550141;C1882979;C2587213|CHV;HL7V2.5;LCH;LNC;MSH;NCI;SNOMEDCT|1|  
0.001|  
CT|control diet|||||1|0.0004|  
CT|control group|C0009932|||||1|0.0002|  
CT|controlled temperature|C0449862|||||1  
CT|conventional therapy|C0087111|||C0087111|NCI|||  
CT|conventional  
treatment|C0087111;C2945704|||C0087111;C2945704|CHV;NCI|1|0.0003|  
CT|core temperature|||||1|0.0005|  
CT|corneal thickness|C0429493|||C0429493|CHV;SNOMEDCT|1|0.0007|1  
CT|corneal transplant|C0010042|||||1  
CT|coronary thrombosis|C0010072|||||1  
CT|corrected transposition|C0332941|||||1  
CT|correctional transfer|||||1  
CT|corrective therapy|||||1  
CT|cortical thickness|||||1|0.0003|1

CT|corticosterone|C0010124|||C0010124;C0373588|AOD;CHV;CSP;LCH;LNC;MSH;MTH;NCI;N  
DFRT;SNOMEDCT|1|0.0005|  
CT|corticothalamic|||||1|0.0006|  
CT|cough threshold|||||1|  
CT|counseling and testing|||||1|0.0004|  
CT|count|C0750480;C1705566|||||1|  
CT|counterindications|C0079164|||C0079164|MSH|||  
CT|countertransference|C0010219|||C0010219|AOD;CHV;MSH;SNOMEDCT|||  
CT|countertransport|||||1|0.0005|  
CT|cover test|C0278241;C0444883|||||1|  
CT|crest time|||||1|  
CT|cricothyroid|C0224178|||C0224178|CHV;FMA;UWDA|1|0.002|  
CT|cricothyroid  
muscle|C0224178;C1280271|||C0224178;C1280271|CHV;FMA;MSH;NCI;SNOMEDCT;UWDA|1|0.0  
005|  
CT|crista  
terminalis|C0225852;C1305795|||C0225852;C1305795|FMA;SNOMEDCT;UWDA|1|0.0014|  
CT|critical thinking|||||1|0.0004|  
CT|crotoxin|C0010377|||C0010377|PDQ|||  
CT|crutch training|||||1|  
CT|ct scanning|C0040405|||C0040405|CHV|||  
CT|ctt|C0040405|||C0040405|CHV|||  
CT|ctt scan|||C0040405|CHV|||  
CT|curly tail|||||1|0.0007|  
CT|cycle threshold|||||1|0.0005|  
CT|cystine-tellurite|||||1|  
CT|cytidyltransferase|C1333192|||C1333192|NCI|||  
CT|cytoplasmic domain|C1511625|||||1|0.0003|  
CT|cytoplasmic tail|C1511625|||C1511625|NCI|1|0.0014|  
CT|cytotechnology|C1552390|||||1|  
CT|cytotoxic|C0677881;C1511636|||C0677881;C1511636|MTH;NCI|||  
CT|cytotoxic therapy|C0677881|||||1|  
CT|cytotrophoblast|C0230960;C1281788|||C0230960;C1281788|CHV;FMA;MSH;NCI;SNOMEDC  
T|1|0.0007|  
CT|emi scan|||C0040405|CHV|||  
CT|phosphate cytidyltransferase 1, choline, alpha|C1418396|||C1418396|HUGO|||  
CT|phosphate cytidyltransferase 1, choline, alpha  
isoform|C1418396|||C1418396|HUGO|||  
CT|scan cat|C0040405|||C0040405|CHV|||  
CT|scan ct|C0040405|||C0040405|CHV|||  
CT|therapy behavior cognitive|||C0009244|CHV|||  
CT|therapy cognitive|||C0009244|CHV|||  
CT|threshold cycle|||||1|0.0006|  
CT|tomodensitometry|C0040405|||C0040405|CHV|||  
CT|tomography|C0040395;C0040405|||C0040405|NCI|1|0.001|  
CT|tomography, computed|C0040405;C1552357|||C0040405|PDQ|||  
CT|training|C0040607;C0220931;C2673163|||||1|0.0008|  
CT|twitch contraction time|||||1|0.0004|  
CT|x-ray computed tomography|C0040405|||C0040405|CHV|||  
CVA|ACCIDENT CEREBROVASCULAR|||C0038454|CST|||  
CVA|ACO|||C0054889|NCI;PDQ|||  
CVA|APOPLEXY|C0038454|||C0038454|CST|||  
CVA|APOPLEXY, CEREBRAL|C0038454|||C0038454|DXP|||  
CVA|Accident - cerebrovascular|||C0038454|SNOMEDCT|||  
CVA|Acute ill-defined cerebrovascular  
disease|C0001365|||C0001365|MTH;SNOMEDCT|||  
CVA|Acute ill-defined cerebrovascular disease (disorder)|||C0001365|SNOMEDCT|||

CVA|Acute ill-defined cerebrovascular disease,  
NOS|C0001365|||C0001365|SNOMEDCT|||  
CVA|Acute, but ill-defined cerebrovascular disease|||C0001365|ICD9CM|||  
CVA|Apoplexy|C0038454|||C0038454|MSH;NDFRT;SNOMEDCT|||  
CVA|Apoplexy, Cerebrovascular|C0038454|||C0038454|MSH|||  
CVA|Apoplexy, NOS|C0038454|||C0038454|SNOMEDCT|||  
CVA|Brain Attack|C0038454|||C0038454|MEDLINEPLUS|||  
CVA|Brain Vascular Accident|C0038454|||C0038454|MSH|||  
CVA|Brain Vascular Accidents|C0038454|||C0038454|MSH|||  
CVA|Brain attack|C0038454|||C0038454|MEDLINEPLUS|||  
CVA|CAV|||C0054889|PDQ|||  
CVA|CAV chemotherapy protocol|C0054889|||C0054889|CHV|||  
CVA|CAV protocol|C0054889|||C0054889|MSH|||  
CVA|CDV|||C0054889|NCI;PDQ|||  
CVA|CEREBRAL INFARCTION|C0007785;C0038454|||C0038454|OMIM|||  
CVA|CEREBRAL VASCULAR ACCIDENT|C0038454|||C0038454|DXP|||  
CVA|CEREBROVASCULAR ACCIDENT|C0038454|||C0038454|CST;NCI;OMIM|||  
CVA|CEREBROVASCULAR ACCIDENT, (CVA)|C0038454|||C0038454|NCI|||  
CVA|CHO|||C0054889|NCI;PDQ|||  
CVA|CTX/DOX/VCR|||C0054889|NCI;PDQ|||  
CVA|CVA|C0038454|||C0038454;C0054889|CHV;CST;DXP;NCI;PDQ;SNOMEDCT|||  
CVA|CVA (Cerebrovascular Accident)|C0038454|||C0038454|MSH;NDFRT|||  
CVA|CVA (cerebral vascular accident)|||C0038454|CSP|||  
CVA|CVA - Cerebrovascular accident|C0038454|||C0038454|SNOMEDCT|||  
CVA|CVA - Cerebrovascular accident unspecified|||C0038454|SNOMEDCT|||  
CVA|CVA - cerebrovascular accident (& unspecified [&  
stroke])|||C0038454|SNOMEDCT|||  
CVA|CVA - cerebrovascular accident (& unspecified [& stroke])  
(disorder)|||C0038454|SNOMEDCT|||  
CVA|CVA unspecified|||C0038454|SNOMEDCT|||  
CVA|CVA, CEREBROVASCULAR ACCIDENT|C0038454|||C0038454|NCI|||  
CVA|CVA, NOS|C0038454|||C0038454|SNOMEDCT|||  
CVA|CVAs (Cerebrovascular Accident)|||C0038454|MSH|||  
CVA|Cerebral Stroke|C0038454|||C0038454|MSH;NDFRT|||  
CVA|Cerebral Strokes|C0038454|||C0038454|MSH|||  
CVA|Cerebral apoplexy|C0038454|||C0038454|SNOMEDCT|||  
CVA|Cerebral apoplexy, NOS|C0038454|||C0038454|SNOMEDCT|||  
CVA|Cerebrovascular Accident|C0038454|||C0038454|COSTAR;MSH;NCI;NDFRT|||  
CVA|Cerebrovascular Accidents|C0038454|||C0038454|MSH|||  
CVA|Cerebrovascular Apoplexy|C0038454|||C0038454|MSH;NDFRT|||  
CVA|Cerebrovascular Stroke|C0038454|||C0038454|MSH;NDFRT|||  
CVA|Cerebrovascular Strokes|C0038454|||C0038454|MSH|||  
CVA|Cerebrovascular accident|C0038454|||C0038454|LNC;MTH;OMIM;SNOMEDCT|||  
CVA|Cerebrovascular accident (disorder)|||C0038454|SNOMEDCT|||  
CVA|Cerebrovascular accident (disorder) [Ambiguous]|||C0038454|SNOMEDCT|||  
CVA|Cerebrovascular accident, NOS|C0038454|||C0038454|SNOMEDCT|||  
CVA|Clavulanic acid|C0055860|||1|0.0364|  
CVA|Cough variant asthma|C0694548|||1|0.0616|  
CVA|Cva|C0038454|||C0001365|ICD9CM|||  
CVA|Cyclophosphamide/Doxorubicin/Vincristine|||C0054889|NCI|||  
CVA|OCA|C1015366|||C0054889|NCI;PDQ|||  
CVA|STROKE|C0038454|||C0038454|COSTAR;CST;DXP;NCI|||  
CVA|STROKE SYNDROME|C0038454;C1263853|||C0038454|NCI|||  
CVA|SYNDROME, STROKE|C0038454;C1263853|||C0038454|NCI|||  
CVA|Stroke|C0038454|||C0038454|MEDLINEPLUS;MSH;MTH;NCI;NDFRT;OMIM;SNOMEDCT|||  
CVA|Stroke NOS|C0038454|||C0038454|SNOMEDCT|||  
CVA|Stroke NOS (disorder)|||C0038454|SNOMEDCT|||

CVA|Stroke Syndrome|C0038454;C1263853|||C0038454|NCI|||  
CVA|Stroke [Disease/Finding]|||C0038454|NDFRT|||  
CVA|Stroke and cerebrovascular accident unspecified|||C0038454|SNOMEDCT|||  
CVA|Stroke and cerebrovascular accident unspecified  
(disorder)|||C0038454|SNOMEDCT|||  
CVA|Stroke unspecified|||C0038454|SNOMEDCT|||  
CVA|Stroke, Cerebral|C0038454|||C0038454|MSH|||  
CVA|Stroke, Cerebrovascular|C0038454|||C0038454|MSH|||  
CVA|Stroke, NOS|C0038454|||C0038454|SNOMEDCT|||  
CVA|Stroke/CVA - undefined|||C0038454|SNOMEDCT|||  
CVA|Stroke/cerebrovasc accident|||C0038454|ICPC|||  
CVA|Stroke/cerebrovascular accident|||C0038454|ICPC|||  
CVA|Strokes|C0038454|||C0038454|MSH;OMIM|||  
CVA|Strokes, Cerebral|C0038454|||C0038454|MSH|||  
CVA|Strokes, Cerebrovascular|C0038454|||C0038454|MSH|||  
CVA|VA-C|C0054889|||C0054889|NCI;PDQ|||  
CVA|VAC|||C0054889|NCI;PDQ|||  
CVA|VADRC|C0054889|||C0054889|NCI;PDQ|||  
CVA|Vascular Accident, Brain|C0038454|||C0038454|MSH;NDFRT|||  
CVA|Vascular Accidents, Brain|C0038454|||C0038454|MSH|||  
CVA|apoplexy|C0038454|||C0038454|CHV;CSP|||  
CVA|canonical variate analysis|||1|0.0224|  
CVA|cardiovascular accident|||1|  
CVA|cerebral stroke|C0038454|||C0038454|CHV|||  
CVA|cerebral vascular accident|C0038454|||C0038454|AOD;CHV;CSP;DXP|||  
CVA|cerebral vascular accidents|||1|0.042|  
CVA|cerebrovascular  
accident|C0038454|1|0.556|C0038454|CHV;COSTAR;CSP;CST;LNC;MSH;MTH;NCI;NDFRT;OMIM  
;SNOMEDCT|1|0.8067|1|  
CVA|cerebrovascular accidents|C0038454|||C0038454|CHV|||  
CVA|cerebrovascular disease|C0007820|||1|0.0308|  
CVA|cerebrovascular stroke|C0038454|||C0038454|CHV|||  
CVA|cerivastatin|C0528023|||C0528023|CHV;MSH;NCI;NDFRT;SNOMEDCT;VANDF|||  
CVA|cervicovaginal antibody|||1|  
CVA|chronic villous arthritis|||1|  
CVA|corrected visual acuity|C1275680|||C1275680|CHV;SNOMEDCT|||  
CVA|costovertebral angle|||1|0.444|||1|  
CVA|cough variant asthma|C0694548|||C0694548|CHV;ICD9CM;SNOMEDCT|||1|  
CVA|cresyl violet acetate|C0056485|||1|  
CVA|cyclophosphamide/doxorubicin/vincristine|||C0054889|PDQ|||  
CVA|cyclophosphamide/doxorubicin/vincristine protocol|C0054889|||C0054889|MTH|||  
CVA|stroke|C0038454|||C0038454|AOD;CHV;CSP;NCI|||  
CVA|stroke cerebral|||C0038454|CHV|||  
CVA|strokes|C0038454|||C0038454|CHV|||  
CVA|vascular brain accident|C0038454|||C0038454|CHV|||  
CVA|vascular cerebral accident|C0038454|||C0038454|CHV|||  
CVI|Cape Verde Islands|C0006893|||1|0.0146|  
CVI|Children's Vaccine Initiative|||1|0.0521|1|  
CVI|Chronic Venous Insufficiency|C1306557|||1|0.5521|  
CVI|cardiovascular incident|||1|  
CVI|cardiovascular insufficiency|||1|  
CVI|cerebrovascular incident|||1|  
CVI|cerebrovascular infarct|||1|1.000|||1|  
CVI|cerebrovascular infarction|||1|  
CVI|cerebrovascular insufficiency|C0241832|||1|  
CVI|chronic venous insufficiency|C1306557|||1|  
CVI|common variable immunodeficiency|C0009447|||1|0.2604|1|

CVI|content validity index|||||1|0.0313|  
CVI|continuous intravenous infusion|C1511497|||||1|0.0125|  
CVI|continuous venous infusion|||||1|0.0104|1  
CVI|cortical visual impairment|C1531862|||||1|  
CVI|cyclic variation index|||||1|0.0208|  
CVI|visual impairment|C0042798|||||1|0.0458|  
CVP|CDDP/CTX/VP-16|||||C0280556|NCI;PDQ|||  
CVP|CEP|||||C0280556|PDQ|||  
CVP|COP|C0086825|||||C0056633|PDQ|||  
CVP|COP chemotherapy protocol 2|C0056633|||||C0056633|CHV|||  
CVP|COP protocol 2|C0056633|||||C0056633|MSH|||  
CVP|CTX/PRED/VCR|||||C0056633|NCI;PDQ|||  
CVP|CVP|C0056633;C0280556|||||C0056633;C0280556|NCI;PDQ|||  
CVP|CVP Regimen|C0056633|||||C0056633|NCI|||  
CVP|CVP regimen|C0056633|||||C0056633|NCI|||  
CVP|Cisplatin/Cyclophosphamide/Etoposide|||||C0280556|NCI|||  
CVP|Cyclophosphamide-Vincristine-Prednisone Regimen|C0056633|||||C0056633|NCI|||  
CVP|Cyclophosphamide/Prednisone/Vincristine|||||C0056633|NCI|||  
CVP|PCE|C0246101;C0280556;C1588205|||||C0280556|NCI;PDQ|||  
CVP|PVC|C0151636|||||C0280556|NCI;PDQ|||  
CVP|VCP|C0056633;C1421437|||||C0056633|NCI;PDQ|||  
CVP|VCP-1|C0280556|||||C0280556|NCI;PDQ|||  
CVP|cardiac valve procedure|||||1|  
CVP|cardiovascular pulmonary||1|0.004|||||  
CVP|cardioventricular pacing|||||1|  
CVP|cell volume profile|||||1|  
CVP|central venous|C0444466|||||1|0.0305|  
CVP|central venous  
pressure|C0428640;C1321771|1|0.872|C0428640;C1321771|CHV;LCH;MSH;MTH;SNOMEDCT|1|  
0.9523|1  
CVP|cerebrovascular profile|||||1|  
CVP|chlorphenvinphos|C0008195|||||1|0.0172|  
CVP|cisplatin/cyclophosphamide/etoposide|||||C0280556|PDQ|||  
CVP|cisplatin/cyclophosphamide/etoposide protocol|C0280556|||||C0280556|MTH|||  
CVP|cyclophosphamide, prednisone, and vincristine chemotherapy  
protocol|||||C0056633|CHV|||  
CVP|cyclophosphamide, vincristine, prednisone||1|0.124|||||  
CVP|cyclophosphamide/prednisone/vincristine|||||C0056633|PDQ|||  
CVP|cyclophosphamide/prednisone/vincristine protocol|C0056633|||||C0056633|MTH|||  
CV|C-V|C1547550|||||C1547550|NCI|||  
CV|CAPE VERDE|C0006893|||||C0006893|NCI|||  
CV|CPV|C0006893;C0056285|||||C0006893|NCI|||  
CV|CTX/VP-16|||||C0280551|NCI;PDQ|||  
CV|CTX/VP-16 chemotherapy protocol|||||C0280551|CHV|||  
CV|CV|C2699739|||||C0006893;C0280551;C0681921;C1547550;C1880201;C2699739|NCI;PDQ|||  
|  
CV|Cape Verde|C0006893|||||C0006893|MSH;MTH;NCI|||  
CV|Cape Verde islands|C0006893|||||C0006893|SNOMEDCT|||  
CV|Cape Verde islands (geographic location)|||C0006893|SNOMEDCT|||  
CV|Chiba norovirus||1|0.002|||||  
CV|Cibus Vespertinus (dinner)|||C2699739|HL7V2.5|||  
CV|Circularvection|||||1|0.0029|  
CV|Coefficient of Variance|C0681921|||||C0681921|MTH;NCI|||  
CV|Coefficient of Variation|C0681921|||||C0681921|NCI|||  
CV|Cross-validation|C0681935|||||1|0.0042|  
CV|Crystal Violet|C0017440|||||1|0.0086|  
CV|Curriculum Vitae|C1880201|||||C1880201|MTH;NCI|||

CV|Cyclophosphamide/Etoposide|||C0280551|NCI|||  
CV|Dinner|C2699739|||C2699739|NCI|||  
CV|Republic of Cape Verde|C0006893|||C0006893|MSH|||  
CV|Resume|C1550028;C1880201|||C1880201|NCI|||  
CV|SPL DEA Schedule V|C1547550|||C1547550|NCI|||  
CV|Schedule V|C1547550|||C1547550|HL7V2.5;NCI|||  
CV|Schedule V Controlled Substance|C1547550|||C1547550|NCI|||  
CV|Schedule V Substance|C1547550|||C1547550|MTH;NCI|||  
CV|Supper|C2699739|||C2699739|MTH;NCI|||  
CV|VC|||C0280551|PDQ|||  
CV|cape verde|C0006893|||C0006893|CHV|||  
CV|cardiac volume|C0007179|||1|||  
CV|cardiovascular|C0007226|1|0.958|C0007226|LNC;NCI;OMIM|1|0.1388|1  
CV|care vigilance|||1|||  
CV|carotenoid vesicle|C2248600|||1|||  
CV|cell volume|C0596292|||1|||  
CV|central venous|C0444466|1|0.006|||1|0.007|1  
CV|cerebrovascular|C1880018|||1|||  
CV|cervical vertebra|C0728985;C1269049|||1|||  
CV|chorionic villi|C0008508|||1|0.008|  
CV|chorionic villus|C0008508|||1|0.0074|  
CV|cibus vespertinus|C2699739|||C2699739|NCI|||  
CV|closed vitrectomy|||1|||  
CV|closing volume|C0009050|||1|0.0227|1  
CV|coated vesicles|C0242915|||1|0.0029|  
CV|coefficient of variability|||1|0.0038|  
CV|coefficient of variance|C0681921|||1|0.0189|  
CV|coefficient of variation|C0681921|||C0681921|AOD;CHV;NCI|1|0.5944|1  
CV|collateralizing vessel|||1|||  
CV|collecting vein|||1|||  
CV|color vision|C0086032|||1|||  
CV|coma vigil|C0001889|||1|||  
CV|common ventricle|C0152424|||1|||  
CV|concentrated volume|||1|||  
CV|conceptual vessel|||1|||  
CV|conducting vein|||1|||  
CV|conduction velocity|C0234084|||1|0.0685|1  
CV|consonant vowel|||1|||  
CV|contingent valuation|||1|0.0096|  
CV|contrast venography|||1|0.0035|  
CV|contrast ventriculography|||1|0.0035|1  
CV|conventional ventilation|||1|0.0195|1  
CV|conversational voice|||1|||  
CV|corpuscular volume||1|0.006|||1  
CV|costovertebral||1|0.018|||1  
CV|cowpox virus|C0010233|||1|0.0016|  
CV|craniosacral vault|||1|||  
CV|cresyl violet|C0056484|||1|||  
CV|critical value|||1|||  
CV|crystal violet|C0017440|||1|||  
CV|curriculum vitae|C1880201|||1|0.0035|1  
CV|cutaneous vasculitis|C0262988|||1|||  
CV|cyclic voltammetry|||1|0.0528|  
CV|cyclophosphamide and etoposide chemotherapy protocol|||C0280551|CHV|||  
CV|cyclophosphamide/etoposide|||C0280551|PDQ|||  
CV|cyclophosphamide/etoposide protocol|||C0280551|MTH|||  
CV|dichotic consonant-vowel|||1|0.0051|

CV|electrical cardioversion|C0013778;C0542380|||||1|0.0022|  
CV|true conjugate|C0923003|||||1|  
CV|vaccine|C0042210;C1552558|||||1|0.0032|  
CV|value|C1522609|||||1|0.0029|  
CV|vasculitis|C0042384;C1963274|||||1|0.0029|  
CV|venous compliance|||||1|0.0016|  
CVS|Biopsies, Chorionic Villi|C0008509|||C0008509|MSH|||  
CVS|Biopsy, Chorionic Villi|C0008509|||C0008509|MSH|||  
CVS|CORONAVIRUS 229E SUSCEPTIBILITY|C1852539|||C1852539|MTH;OMIM|||  
CVS|CVB - Chorionic villus biopsy|C0008509|||C0008509|SNOMEDCT|||  
CVS|CVS|||C0008509;C0152164;C1852539|CSP;LNC;OMIM|||  
CVS|CVS - Chorionic villus sampling|C0008509|||C0008509|SNOMEDCT|||  
CVS|CYCLIC VOMITING SYNDROME|C0152164;C2700509|||C0152164|OMIM|||  
CVS|Challenge virus standard|||||1|0.0263|  
CVS|Chorionic Villi Biopsies|C0008509|||C0008509|MSH|||  
CVS|Chorionic Villi Biopsy|C0008509|||C0008509|MSH|||  
CVS|Chorionic Villi Sampling|C0008509|||C0008509|MEDLINEPLUS;MSH;MTH|||  
CVS|Chorionic Villi Samplings|C0008509|||C0008509|MSH|||  
CVS|Chorionic Villus Sampling|C0008509|||C0008509|MSH;NCI|||  
CVS|Chorionic Villus Samplings|C0008509|||C0008509|MSH|||  
CVS|Chorionic villus sampling|C0008509|||C0008509|MTHICD9|||  
CVS|Coated vesicles|C0242915|||||1|0.0183|  
CVS|Cyclic vomiting syndrome|C0152164;C2700509|||C0152164|MSH|||  
CVS|Cyclical vomiting|C0152164|||C0152164|MTHICD9;SNOMEDCT|||  
CVS|Cyclical vomiting NOS|C0152164|||C0152164|SNOMEDCT|||  
CVS|Cyclical vomiting NOS (disorder)|C0152164|||C0152164|SNOMEDCT|||  
CVS|Cyclical vomiting syndrome|C0152164|||C0152164|SNOMEDCT|||  
CVS|Cyclical vomiting syndrome (disorder)|C0152164|||C0152164|MTH;SNOMEDCT|||  
CVS|Familial cyclic vomiting syndrome|C0152164|||C0152164|MSH|||  
CVS|HCVS|C1415503;C1852539|||C1852539|OMIM|||  
CVS|HUMAN CORONAVIRUS SENSITIVITY|C1415503;C1852539|||C1852539|OMIM|||  
CVS|Periodic vomiting|C0152164|||C0152164|SNOMEDCT|||  
CVS|Sampling of chorionic villus|C0008509|||C0008509|SNOMEDCT|||  
CVS|Sampling of chorionic villus (procedure)|||C0008509|SNOMEDCT|||  
CVS|Sampling, Chorionic Villi|C0008509|||C0008509|MSH|||  
CVS|Sampling, Chorionic Villus|C0008509|||C0008509|MSH|||  
CVS|Samplings, Chorionic Villi|C0008509|||C0008509|MSH|||  
CVS|Samplings, Chorionic Villus|C0008509|||C0008509|MSH|||  
CVS|cardiovascular surgery|C0038897|||||1|  
CVS|cardiovascular system|C0007226;C1269562|1|0.082|||1|0.0366|1|  
CVS|centrifugal visual system|||||1|0.0103|  
CVS|cerebral vasospasm|C0265110|||||1|0.0137|1|  
CVS|cervicovaginal secretions|||||1|0.0137|  
CVS|challenge virus strain|||||1|  
CVS|chorionic villi biopsy|C0008509|||C0008509|CHV|||  
CVS|chorionic villi sampling|C0008509|||C0008509|AOD;CHV|||  
CVS|chorionic villus samples|||||1|0.0606|  
CVS|chorionic villus sampling|C0008509|1|0.914|C0008509|CHV;CSP|1|0.4|1|  
CVS|chorionic villus sampling (CVS)|C0008509|||C0008509|CHV|||  
CVS|chronic variable stress|||||1|0.0137|  
CVS|clathrin-coated vesicles|C0887885|||||1|0.0091|  
CVS|clean-voided specimen|||||1|  
CVS|coefficients of variation|||||1|0.3326|  
CVS|collagen vascular sealing|||||1|  
CVS|computer vision syndrome|||||1|  
CVS|conduction velocities|C0234084|||||1|0.0309|  
CVS|continuing vegetative state|||||1|

CVS|coronavirus susceptibility|||||||1  
CVS|current vital signs|||||||1  
CVS|customer, value, service||1|0.004||||  
CVS|cyclic vomiting syndrome|C0152164;C2700509|||||1|0.0343|1  
CVS|cyclical syndrome vomiting|||C0152164|CHV||  
CVS|cyclical vomiting|C0152164|||C0152164|CHV||  
CVS|cyclical vomiting disorder|C0152164|||C0152164|CHV||  
CVS|cyclical vomiting syndrome|C0152164|||C0152164|CHV||  
CVS|cyclical vomiting|||C0152164|CHV||  
CVS|periodic vomiting|C0152164|||C0152164|CHV||  
CVS|vomiting syndrome cyclical|||C0152164|CHV||  
CXR|CHRISTMAS ISLAND|C0006888|||C0006888|NCI||  
CXR|CX|||C0006888|NCI||  
CXR|CXR|C0006888;C0039985|||C0006888|NCI||  
CXR|CXR - Chest X-ray|C0039985|||C0039985|SNOMEDCT||  
CXR|Canton and Enderbury Islands|C0006888|||C0006888|MSH||  
CXR|Chest Radiography|C0039985|||C0039985|NCI||  
CXR|Chest X-ray|C0039985;C1114557|||C0039985|MTH;NCI;SNOMEDCT||  
CXR|Chest exclusion X-ray|C0039985|||C0039985|SNOMEDCT||  
CXR|Chest x-ray|C0039985;C1114557|||C0039985|SNOMEDCT||  
CXR|Chest x-ray, NOS|C0039985;C1114557|||C0039985|SNOMEDCT||  
CXR|Christmas Island|C0006888|||C0006888|MSH;MTH;NCI||  
CXR|Christmas Island (Australia)|||C0006888|MSH||  
CXR|KT|C1690540|||C0006888|NCI||  
CXR|Plain chest X-ray|C0039985|||C0039985|SNOMEDCT||  
CXR|Plain chest X-ray (procedure)|||C0039985|SNOMEDCT||  
CXR|RADIOGR THORACIC|||C0039985|MSH||  
CXR|Radiographic procedure on chest|||C0039985|SNOMEDCT||  
CXR|Radiographic procedure on chest (procedure)|||C0039985|SNOMEDCT||  
CXR|Radiographies, Thoracic|C0039985|||C0039985|MSH||  
CXR|Radiography of chest|C0039985|||C0039985|SNOMEDCT||  
CXR|Radiography of chest (procedure)|||C0039985|SNOMEDCT||  
CXR|Radiography of chest, NOS|C0039985|||C0039985|SNOMEDCT||  
CXR|Radiography, Thoracic|C0039985|||C0039985|MSH||  
CXR|Radiologic examination of chest|C0039985|||C0039985|SNOMEDCT||  
CXR|Radiologic examination of chest, NOS|C0039985|||C0039985|SNOMEDCT||  
CXR|THORACIC RADIOGR|||C0039985|MSH||  
CXR|Thoracic Radiographies|C0039985|||C0039985|MSH||  
CXR|Thoracic Radiography|C0039985|||C0039985|MSH;MTH||  
CXR|Thoracic cage X-ray|C0039985|||C0039985|SNOMEDCT||  
CXR|Thoracic cage X-ray (procedure)|||C0039985|SNOMEDCT||  
CXR|X-ray of chest NOS|C0039985|||C0039985|MTHICD9||  
CXR|X-ray thoracic cage NOS|C0039985|||C0039985|SNOMEDCT||  
CXR|X-ray thoracic cage NOS (procedure)|||C0039985|SNOMEDCT||  
CXR|chest X ray|C0039985;C1114557|||C0039985|CSP||  
CXR|chest X-ray|C0039985;C1114557|||||1|0.4466|  
CXR|chest radiograph|||||1|0.3206|  
CXR|chest radiography|C0039985|||C0039985|CHV;CSP|1|0.1794|  
CXR|chest roentgenogram|||||1|0.0534|  
CXR|chest x ray|C0039985;C1114557|||C0039985|CHV||  
CXR|chest x rays|C0039985|||C0039985|CHV||  
CXR|chest x-ray|C0039985;C1114557|1|1.000|C0039985|CHV;NCI||||1  
CXR|cxr|C0006888;C0039985|||C0039985|CHV||  
CXR|thoracic radiography|C0039985|||C0039985|AOD;CSP||  
CXR|thoracic x rays|C0039985|||C0039985|CHV||  
CXR|thoracic x-ray|C0039985|||C0039985|CHV||  
CXR|thorax x-ray|C0039985|||C0039985|CHV||

D&C|CURETTAGE DILATATION|C0012358|||C0012358|MSH|||  
D&C|Curettage and Dilatation|||C0012358|MSH|||  
D&C|D & C|C0012358;C0012764;C1444662;C1512015|||C0012358|MSH|||  
D&C|D and C|C0012358|||C0012358|NCI|||  
D&C|D&C|C0012358;C0012764;C1444662;C1512015|||C0012358|MSH;NCI|||  
D&C|D&C - Dilatation and curettage|C0012358|||C0012358|SNOMEDCT|||  
D&C|DILATATION CURETTAGE|C0012358|||C0012358|MSH|||  
D&C|DILATION AND CURETTAGE|||C0012358|COSTAR|||  
D&C|Dilatation & Curettage|C0012358|||C0012358|MSH|||  
D&C|Dilatation and Curettage|C0012358|||C0012358|MSH;MTH|||  
D&C|Dilatation and curettage|C0012358|||C0012358|SNOMEDCT|||  
D&C|Dilatation and curettage NOS|C0012358|||C0012358|SNOMEDCT|||  
D&C|Dilatation and curettage NOS (procedure)|||C0012358|SNOMEDCT|||  
D&C|Dilatation of cervix and curettage of uterus|||C0012358|SNOMEDCT|||  
D&C|Dilatation of cervix and curettage of uterus  
(procedure)|||C0012358|SNOMEDCT|||  
D&C|Dilation and Curettage|||C0012358|NCI|||  
D&C|Dilation and Curettage of the Uterus|||C0012358|NCI|||  
D&C|Dilation and curettage|||C0012358|MTHICD9;SNOMEDCT|||  
D&C|Dilation and curettage (procedure)|||C0012358|SNOMEDCT|||  
D&C|Dilation and curettage - action|||C0012358|SNOMEDCT|||  
D&C|Dilation and curettage - action (qualifier value)|||C0012358|SNOMEDCT|||  
D&C|Dilation and curettage of uterus|||C0012358|ICD9CM;SNOMEDCT|||  
D&C|Dilation and curettage of uterus (procedure)|||C0012358|SNOMEDCT|||  
D&C|Dilation and curettage of uterus, NOS|||C0012358|SNOMEDCT|||  
D&C|Dilation and curettage, NOS|||C0012358|SNOMEDCT|||  
D&C|Uterine endometrectomy|C0012358|||C0012358|SNOMEDCT|||  
D&C|c d|C0012358|||C0012358|CHV|||  
D&C|curettage dilatation|C0012358|||C0012358|CHV|||  
D&C|curettage dilatation uterus|C0012358|||C0012358|CHV|||  
D&C|curettage dilation|C0012358|||C0012358|CHV|||  
D&C|deep and clear|||1  
D&C|dilatation and curettage|C0012358|||C0012358|AOD;NCI|1|1|  
D&C|dilatation curettage|C0012358|||C0012358|CHV|||  
D&C|dilation and curettage||1|0.982|C0012358|NCI|||1  
D&C|dilation curettage|C0012358|||C0012358|CHV|||  
D&C|direct and consensual||1|0.018|||1  
D&C|drugs and cosmetics|||1  
D&C|uterus d c|C0012358|||C0012358|CHV|||  
D1|(cyclin) D1|C0174680|1|0.014|||1  
D1|(vitamin) D1||1|0.028|||1  
D1|D|C1416886;C1442449|||C1416886|HUGO;OMIM|||  
D1|64kD|C1416886|||C1416886|HUGO|||  
D1|D1|C1416886|||C1416886|HUGO;OMIM|||  
D1|HASHIMOTO THYROIDITIS AUTOANTIGEN, 64-KD|C1416886|||C1416886|OMIM|||  
D1|LEIOMODIN 1|C1416886|||C1416886|OMIM|||  
D1|LEIOMODIN, SMOOTH MUSCLE|C1416886|||C1416886|OMIM|||  
D1|LMOD1|C1416886|||C1416886|HUGO;OMIM|||  
D1|LMOD1 gene|C1416886|||C1416886|HUGO;MTH|||  
D1|SMLMOD|C1416886|||C1416886|OMIM|||  
D1|THYROID AND EYE MUSCLE AUTOANTIGEN, 64-KD|||C1416886|OMIM|||  
D1|THYROID-ASSOCIATED OPHTHALMOPATHY AUTOANTIGEN, 64-KD|||C1416886|OMIM|||  
D1|Type 1 iodothyronine deiodinase|||1|0.0432|  
D1|day one|||1  
D1|deiodinase type 1|||1  
D1|depression 1||1|0.002|||1  
D1|domain|C1880389;C1883221|||1|0.2662|

D1|domain 1|||||1|0.1151|  
D1|first|C0205435;C1279901|||||1|0.1079|  
D1|first day|||||1|0.0432|  
D1|first diagonal branch||1|0.952||1|0.0432|1  
D1|leiomodrin 1 (smooth muscle)|||C1416886|HUGO|||  
D1|limited|C0439801|||||1|0.0863|  
D1|type 1 deiodinase|C0669524|||||1|0.0791|  
D1|type I|C0441729|||||1|0.0647|  
D1|type I deiodinase|||||1|0.1007|  
D1|type I iodothyronine deiodinase|C1414051|||||1|0.0504|  
DCIS|Carcinoma, Intraductal|C0007124|||C0007124|MSH;NDFRT|||  
DCIS|Carcinoma, Intraductal, Noninfiltrating|C0007124|||C0007124|MSH;NDFRT|||  
DCIS|Carcinoma, Intraductal, Noninfiltrating  
[Disease/Finding]|||C0007124|NDFRT|||  
DCIS|Carcinoma, Noninfiltrating Intraductal|C0007124|||C0007124|MSH|||  
DCIS|Carcinomas, Intraductal|C0007124|||C0007124|MSH|||  
DCIS|Carcinomas, Noninfiltrating Intraductal|||C0007124|MSH|||  
DCIS|DCIS|C0007124|||C0007124|CSP;LNC;MSH;NCI;NDFRT;SNOMEDCT|||  
DCIS|DCIS of the breast|C0007124|||C0007124|PDQ|||  
DCIS|Ductal Breast Carcinoma In Situ|C0007124|||C0007124|NCI|||  
DCIS|Ductal Breast Carcinoma in Situ|C0007124|||C0007124|NCI|||  
DCIS|Ductal Carcinoma In Situ|C0007124|||C0007124|MSH;NDFRT|||  
DCIS|Ductal Carcinoma in situ|C0007124|||C0007124|NCI|||  
DCIS|Ductal Carcinoma in situ of Breast|C0007124|||C0007124|NCI|||  
DCIS|Ductal Carcinoma in situ of the Breast|C0007124|||C0007124|NCI|||  
DCIS|Ductal carcinoma in situ|C0007124|||C0007124|SNOMEDCT|||  
DCIS|Intraduct carcinoma of breast|||C0007124|SNOMEDCT|||  
DCIS|Intraduct carcinoma of breast (disorder)|||C0007124|SNOMEDCT|||  
DCIS|Intraductal Breast Carcinoma|C0007124|||C0007124|NCI|||  
DCIS|Intraductal Carcinoma|C0007124|||C0007124|MSH;NCI|||  
DCIS|Intraductal Carcinoma of Breast|C0007124|||C0007124|NCI|||  
DCIS|Intraductal Carcinoma of the Breast|C0007124|||C0007124|NCI|||  
DCIS|Intraductal Carcinoma, Noninfiltrating|C0007124|||C0007124|MSH;NDFRT|||  
DCIS|Intraductal Carcinomas|C0007124|||C0007124|MSH|||  
DCIS|Intraductal Carcinomas, Noninfiltrating|||C0007124|MSH|||  
DCIS|Intraductal adenocarcinoma, noninfiltrating|C0007124|||C0007124|SNOMEDCT|||  
DCIS|Intraductal adenocarcinoma, noninfiltrating,  
NOS|C0007124|||C0007124|SNOMEDCT|||  
DCIS|Intraductal carcinoma|C0007124|||C0007124|SNOMEDCT|||  
DCIS|Intraductal carcinoma in situ of breast|C0007124|||C0007124|SNOMEDCT|||  
DCIS|Intraductal carcinoma in situ of breast (disorder)|||C0007124|SNOMEDCT|||  
DCIS|Intraductal carcinoma of breast|C0007124|||C0007124|SNOMEDCT|||  
DCIS|Intraductal carcinoma of breast (disorder)|||C0007124|SNOMEDCT|||  
DCIS|Intraductal carcinoma, NOS|C0007124|||C0007124|SNOMEDCT|||  
DCIS|Intraductal carcinoma, noninfiltrating|C0007124|||C0007124|SNOMEDCT|||  
DCIS|Intraductal carcinoma, noninfiltrating (morphologic  
abnormality)|||C0007124|SNOMEDCT|||  
DCIS|Intraductal carcinoma, noninfiltrating, NOS|C0007124|||C0007124|SNOMEDCT|||  
DCIS|Intraductal carcinoma, noninfiltrating, no ICD-O  
subtype|||C0007124|SNOMEDCT|||  
DCIS|Intraductal carcinoma, noninfiltrating, no ICD-O subtype (morphologic  
abnormality)|||C0007124|SNOMEDCT|||  
DCIS|Non-Infiltrating Ductal Adenocarcinoma of Breast|C0007124|||C0007124|NCI|||  
DCIS|Non-Infiltrating Ductal Adenocarcinoma of the  
Breast|C0007124|||C0007124|NCI|||  
DCIS|Non-Infiltrating Ductal Breast Adenocarcinoma|C0007124|||C0007124|NCI|||  
DCIS|Non-Infiltrating Ductal Breast Carcinoma|C0007124|||C0007124|NCI|||

DCIS|Non-Infiltrating Ductal Carcinoma of Breast|C0007124|||C0007124|NCI|||  
DCIS|Non-Infiltrating Ductal Carcinoma of the Breast|C0007124|||C0007124|NCI|||  
DCIS|Non-Infiltrating Intraductal Adenocarcinoma|C0007124|||C0007124|NCI|||  
DCIS|Non-Infiltrating Intraductal Adenocarcinoma of  
Breast|C0007124|||C0007124|NCI|||  
DCIS|Non-Infiltrating Intraductal Adenocarcinoma of the  
Breast|C0007124|||C0007124|NCI|||  
DCIS|Non-Infiltrating Intraductal Breast  
Adenocarcinoma|C0007124|||C0007124|NCI|||  
DCIS|Non-Infiltrating Intraductal Carcinoma|C0007124|||C0007124|NCI|||  
DCIS|Non-Invasive Ductal Adenocarcinoma of Breast|C0007124|||C0007124|NCI|||  
DCIS|Non-Invasive Ductal Adenocarcinoma of the Breast|C0007124|||C0007124|NCI|||  
DCIS|Non-Invasive Ductal Breast Adenocarcinoma|C0007124|||C0007124|NCI|||  
DCIS|Non-Invasive Ductal Breast Carcinoma|C0007124|||C0007124|NCI|||  
DCIS|Non-Invasive Ductal Carcinoma of Breast|C0007124|||C0007124|NCI|||  
DCIS|Non-Invasive Ductal Carcinoma of the Breast|C0007124|||C0007124|NCI|||  
DCIS|Non-Invasive Intraductal Adenocarcinoma of  
Breast|C0007124|||C0007124|NCI|||  
DCIS|Non-Invasive Intraductal Adenocarcinoma of the  
Breast|C0007124|||C0007124|NCI|||  
DCIS|Non-Invasive Intraductal Breast Adenocarcinoma|C0007124|||C0007124|NCI|||  
DCIS|Non-infiltrating intraductal adenocarcinoma|C0007124|||C0007124|SNOMEDCT|||  
DCIS|Non-infiltrating intraductal carcinoma|C0007124|||C0007124|SNOMEDCT|||  
DCIS|Noninfiltrating Intraductal Carcinoma|C0007124|||C0007124|MSH;MTH|||  
DCIS|Noninfiltrating Intraductal Carcinomas|||C0007124|MSH|||  
DCIS|[M]Intraductal carcinoma, non-infiltrating NOS|||C0007124|SNOMEDCT|||  
DCIS|[M]Intraductal carcinoma, non-infiltrating NOS (morphologic  
abnormality)|||C0007124|SNOMEDCT|||  
DCIS|breast cancer intraductal|||C0007124|CHV|||  
DCIS|breast carcinoma ductal situ|C0007124|||C0007124|CHV|||  
DCIS|breast ductal carcinoma in situ|C0007124|||C0007124|CHV|||  
DCIS|carcinoma ductal in situ|||C0007124|CHV|||  
DCIS|carcinoma ductal situ|C0007124|||C0007124|CHV|||  
DCIS|carcinoma intraductal|||C0007124|CHV|||  
DCIS|carcinomas|C0007097|||1|0.0115|  
DCIS|dci|C0007124;C1413929;C2348081|||C0007124|CHV|||  
DCIS|dcis|C0007124|||C0007124|CHV|||  
DCIS|ductal cancer in situ of the breast|C0007124|||C0007124|PDQ|||  
DCIS|ductal carcinoma in  
situ|C0007124|1|1.000|C0007124|CHV;CSP;MSH;NCI;NDFRT;PDQ;SNOMEDCT|1|0.9572|1  
DCIS|ductal carcinoma in situ of the breast|C0007124|||C0007124|PDQ|1|0.0157|  
DCIS|ductal carcinoma of breast|C1527349|||1|0.001|  
DCIS|ductal carcinoma situ|C0007124|||C0007124|CHV|||  
DCIS|ductal in situ carcinoma|C0007124|||C0007124|CHV|||  
DCIS|in situ ductal breast carcinoma|C0007124|||C0007124|PDQ|||  
DCIS|in situ ductal carcinoma|C0007124|||C0007124|CHV|||  
DCIS|intraductal breast cancer|C0007124|||C0007124|CHV;PDQ|||  
DCIS|intraductal breast carcinoma|C0007124|||C0007124|PDQ|||  
DCIS|intraductal carcinoma|C0007124|||C0007124|CHV;CSP;NCI|1|0.0146|  
DCIS|intraductal carcinoma breast|C0007124|||C0007124|CHV|||  
DC|(diltiazem) DC||1|0.002|||  
DC|(drug) DC||1|0.002|||  
DC|2'-deoxycytidine|||1|0.0025|  
DC|CDR|||C0011485|MSH;NDFRT|||  
DC|Chiropractic Physician|C1512015|||C1512015|NCI|||  
DC|Cytidine, 2'-deoxy-|C0011485|||C0011485|MSH;NDFRT|||  
DC|Cytosine Deoxyribonucleoside|C0011485|||C0011485|MSH;NDFRT|||

DC|Cytosine Deoxyriboside|C0011485|||C0011485|MSH;NDFRT|||  
DC|D.C.|C0012358;C0012764;C1444662;C1512015|||C0012764;C1512015|AOD;NCI|||  
DC|D.C.M.|C1512015|||C1512015|NCI|||  
DC|D/C|C0012358;C0012764;C1444662;C1512015|||C1444662|NCI|||  
DC|DBCN|C1413938;C2699546|||C1413938;C2699546|HUGO;NCI;OMIM|||  
DC|DC|||C0012764;C1413938;C1512015;C1705348;C2699546|HUGO;NCI|||  
DC|DCM|||C1512015|NCI|||  
DC|DCX|C1413938|||C1413938|HUGO;NCI;OMIM|||  
DC|DCX Gene|C1413938|||C1413938|NCI|||  
DC|DCX gene|C1413938|||C1413938|HUGO;LNC;MTH|||  
DC|DCX wt Allele|C2699546|||C2699546|MTH;NCI|||  
DC|DIS|C0451119;C1444662|||C1444662|NCI|||  
DC|DOUBLECORTIN|C1413938;C2698456|||C1413938|OMIM|||  
DC|Deoxycytidine|C0011485|||C0011485|MSH;MTH;NCI;NDFRT|||  
DC|Deoxycytidine [Chemical/Ingredient]|||C0011485|NDFRT|||  
DC|Deoxyribonucleoside, Cytosine|C0011485|||C0011485|MSH|||  
DC|Deoxyriboside, Cytosine|C0011485|||C0011485|MSH|||  
DC|Direct compression|||||1|0.0018|  
DC|Discontinuation|C0457454;C1444662|||C1444662|NCI|||  
DC|Discontinue|C1444662;C1706472|||C1444662|NCI|||  
DC|Discontinued|C1444662|||C1444662|MTH;NCI;SNOMEDCT|||  
DC|Discontinued (qualifier value)|||C1444662|SNOMEDCT|||  
DC|Discontinuous|C0439599;C1444662|||C1444662|NCI|||  
DC|Disease Characteristics|C1705348|||C1705348|NCI|||  
DC|Disease Characteristics Domain|C1705348|||C1705348|MTH;NCI|||  
DC|District of Columbia|C0012764|1|0.062|C0012764|AOD;MSH;MTH;NCI;SNOMEDCT|||  
DC|District of Columbia (geographic location)|||C0012764|SNOMEDCT|||  
DC|Doctor of Chiropractic|C1512015|||C1512015|MTH;NCI|||  
DC|Doublecortex; Lissencephaly, X-Linked (Doublecortin) Gene|C1413938;C2698456|||C1413938|NCI|||  
DC|Doublecortex; Lissencephaly, X-Linked (Doublecortin) wt Allele|C1413938;C2698456|||C2699546|NCI|||  
DC|Dupuytren contracture|C0013312|||||1|  
DC|Dupuytren's contracture|C0013312|||||1|0.0038|  
DC|LISX|C1413938;C2699546|||C1413938;C2699546|HUGO;NCI|||  
DC|NATO code for diphenylarsine chloride|||||1|  
DC|NATO code for diphenylcyanoarsine|||||1|  
DC|SCLH|||C1413938;C2699546|HUGO;NCI|||  
DC|Washington, D.C.|C0012764|||C0012764|AOD;MSH|||  
DC|Washington, DC|C0012764|||C0012764|MSH;NCI|||  
DC|XLIS|C1413938;C1848199;C2699546|||C1413938;C2699546|HUGO;NCI|||  
DC|columbia district|C0012764|||C0012764|CHV|||  
DC|control|C0009932;C0243148;C1550141;C1882979;C2587213|||||1|0.0043|  
DC|d.c.|C0012358;C0012764;C1444662;C1512015|||C0012764|CHV|||  
DC|dC|||C0011485|PDQ|||  
DC|daily census|||||1|  
DC|data communication|||||1|  
DC|data conversion|C2827657|||C2827657|NCI|||  
DC|daycare|C0011017;C2827363|||||1|  
DC|dc|||C1444662|NCI|||  
DC|decarboxylase|C0007054|||||1|  
DC|decrease|C0392756;C0547047|||||1|  
DC|deep compartment|||||1|  
DC|degenerating cell|||||1|  
DC|degree of conversion|||||1|0.009|  
DC|dendritic cell|C0003315;C0011306;C1511762|||||1|  
DC|dendritic cells|C0011306|||||1|0.7836|

DC|deoxycholate|C0086123|||C0086123|CHV;CSP;LNC;MSH;RXNORM;SNOMEDCT|1|0.0058|  
DC|deoxycholic acid|C0011479|||1|0.0022|  
DC|deoxycytidine|C0011485|||C0011485|CHV;CSP;NCI;PDQ|1|0.0076|1  
DC|dermatochalasis|C0010495;C0423124|||1|  
DC|descending  
colon|C0227389|||C0227389|AOD;CHV;CSP;FMA;MSH;MTH;MTHMST;NCI;SNOMEDCT;UWDA|||1  
DC|dextran charcoal|||1|  
DC|dextrocardia|C0011813|||1|  
DC|diabetic coma|C1263960|||1|  
DC|diagnostic center|||1|  
DC|diagnostic code|||1|  
DC|diagonal conjugate|C0923004|||C0923004|FMA;UWDA|||1  
DC|dichorionic|||1|0.004|  
DC|diene conjugates|||1|0.0085|  
DC|differentiated carcinoma|||1|  
DC|differentiated cell|||1|  
DC|diffuse cortical|||1|  
DC|diffusing capacity|C1280474|||1|  
DC|diffusion chambers|||1|0.0157|  
DC|digit copying|||1|  
DC|digital computer|C0086044|||C0086044|MSH|||  
DC|dilated cardiomyopathy|C0007193;C2984282|||1|0.0101|  
DC|dilation and curettage|||1|  
DC|dilation catheter|||1|  
DC|diphenylarsine cyanide|||1|  
DC|diphenylcyanoarsine|C0301230|||C0301230|SNOMEDCT|||  
DC|direct Coombs|||1|  
DC|direct and consensual||1|0.002|||1|  
DC|direct current|C0442831|1|0.304|||1|0.0922|1  
DC|disc|C0180459;C1556138;C1705229;C2348299|||C1444662|NCI|||  
DC|discharge|C0012621;C0030685;C2926602|1|0.062|||1|  
DC|discharged|||1|  
DC|discomfort|C0231218;C0234215|||1|  
DC|discontinue|C1444662;C1706472|1|0.564|||1|  
DC|discontinued|C1444662|||1|  
DC|distal colon|||1|  
DC|distal cusp|C0447396|||1|  
DC|distensibility|||1|0.002|  
DC|distensibility coefficient|||1|0.0067|  
DC|distocervical|||1|  
DC|district of columbia|C0012764|||C0012764|CHV|||  
DC|donor cells|||1|  
DC|dorsal column|C0458459|||1|0.0139|1  
DC|dorsal cortex|||1|0.0031|  
DC|doublecortex|C1413938;C2698456|||C1413938|HUGO|||  
DC|doublecortin|C1413938;C2698456|||C1413938|HUGO|||  
DC|doxycycline|C0013090|||1|0.0076|  
DC|dressing change|C0085671|||C0085671|CHV;MTH;SNOMEDCT|||1  
DC|dual chamber|C0725893|||1|  
DC|duodenal cap|C0227300;C1284424|||C0227300;C1284424|CHV;FMA;SNOMEDCT;UWDA|||1  
DC|dynamic compression|||1|0.0013|1  
DC|dyskeratosis  
congenita|C0265965|||C0265965|CHV;MSH;MTH;NDFRT;PDQ;SNOMEDCT|1|0.0137|1  
DDAVP|1-deamino-8-D-arginine vasopressin|C0011701|||1|0.3715|  
DDAVP|1-desamino-8-D-arginine vasopressin||1|1.000|||1|0.3883|  
DDAVP|DDAVP|C0701195|||C0701195|MSH;MTH;NCI;RXNORM|||  
DDAVP|Desmopressine Ferring|C0701195|||C0701195|MSH|||

DDAVP|Desmospray|C0701195|||C0701195|MSH|||  
DDAVP|Desmotabs|C0701195|||C0701195|MSH|||  
DDAVP|Ferring Brand 1 of Desmopressin Acetate|C0701195|||C0701195|MSH|||  
DDAVP|Ferring, Desmopressine|C0701195|||C0701195|MSH|||  
DDAVP|Octim|C0701195|||C0701195|MSH|||  
DDAVP|Octostim|C0701195|||C0701195|MSH;NCI|||  
DDAVP|ddavp|C0701195|||C0701195|CHV|||  
DDAVP|desmopressin|C0011701|||C0011701|CHV;MSH;MTH;NCI;NDFRT;RXNORM;SNOMEDCT;USP  
MG;VANDF|||  
DDAVP|desmopressin acetate|C0086135|||1|0.2095|  
DDAVP|vasopressin analogue|C2917446|||1|0.0307|  
DDDR|dual, dual, rate||1|1.000|||1|  
DEXA|Absorptiometries, DPX|C1510486|||C1510486|MSH|||  
DEXA|Absorptiometry, DPX|C1510486|||C1510486|MSH|||  
DEXA|Absorptiometry, Dual Energy X Ray|C1510486|||C1510486|MSH|||  
DEXA|Absorptiometry, Dual X Ray|C1510486|||C1510486|MSH|||  
DEXA|Absorptiometry, Dual X-Ray|C1510486|||C1510486|MSH|||  
DEXA|Absorptiometry, Dual-Energy X-Ray|C1510486|||C1510486|MSH|||  
DEXA|BMD scan|C1510486|||C1510486|NCI|||  
DEXA|DEXA|C1510486|||C1510486|CSP;MSH;NCI|||  
DEXA|DEXA scan|C1510486;C1959592|||C1510486|NCI;PDQ|||  
DEXA|DPX Absorptiometry|C1510486|||C1510486|MSH|||  
DEXA|DXA|C1510486|||C1510486|CSP;NCI|||  
DEXA|Dual Energy X Ray Absorptiometry|C1510486|||C1510486|MSH|||  
DEXA|Dual Energy X-ray Absorptiometry|C1510486|||C1510486|NCI|||  
DEXA|Dual X Ray Absorptiometry|C1510486|||C1510486|MSH|||  
DEXA|Dual X-Ray Absorptiometry|C1510486|||C1510486|MSH;NCI|||  
DEXA|Dual X-ray Absorptiometry|C1510486|||C1510486|NCI|||  
DEXA|Dual-Energy X-Ray Absorptiometry|C1510486|||C1510486|MSH;MTH|||  
DEXA|X Ray Absorptiometry, Dual Energy|C1510486|||C1510486|MSH|||  
DEXA|X-Ray Absorptiometry, Dual|C1510486|||C1510486|MSH|||  
DEXA|X-Ray Absorptiometry, Dual-Energy|C1510486|||C1510486|MSH|||  
DEXA|bone mineral density scan|C1510486|||C1510486|NCI|||  
DEXA|dexamethasone|C0011777|1|0.002|||1|0.1563|  
DEXA|dual energy X-ray absorptiometer|||1|0.0125|  
DEXA|dual energy x-ray absorptiometric scan|C1510486|||C1510486|NCI|||  
DEXA|dual energy x-ray absorptiometry|C1510486|||C1510486|CHV;NCI|||  
DEXA|dual x-ray absorptiometry|C1510486|||C1510486|NCI|||  
DEXA|dual-energy X-ray absorptiometry|C1510486|||1|0.8313|  
DEXA|dual-energy x-ray absorptiometry|C1510486|1|0.998|C1510486|CHV;PDQ|||1  
DEXA|dual-energy x-ray absorptiometry (DXA) scan|||C1510486|CHV|||  
DEXA|dxa|C1510486|||C1510486|CHV|||  
DIC|1H-Imidazole-4-carboxamide, 5-(3,3-dimethyl-1-triazenyl)-  
|||C0010927|MSH;NDFRT|||  
DIC|1H-imidazole-4-carboxamide, 5-(3,3-dimethyl-1-triazenyl)-  
|||C0010927|NCI;PDQ|||  
DIC|4-(Dimethyltriazeno)imidazole-5-carboxamide|||C0010927|NCI|||  
DIC|5(or 4)-(dimethyltriazeno)imidazole-4(or 5)-  
carboxamide|||C0010927|NCI;PDQ|||  
DIC|5-(3,3-Dimethyl-1-triazeno)imidazole-4-carboxamide|||C0010927|MSH;NDFRT|||  
DIC|5-(3-3-dimethyl-1-triazenyl)-1H-imidazole-4-  
carboxamide|||C0010927|NCI;PDQ|||  
DIC|5-(Dimethyltriazeno)imidazole-4-carboxamide|||C0010927|NCI|||  
DIC|5-(dimethyltriazeno)imidazole-4-carboxamide|||C0010927|NCI;PDQ|||  
DIC|COAG DISSEM INTRAVASC|||C0012739|MSH|||  
DIC|COAGULATION (DIC), DISSEMINATED INTRAVASCULAR|C0012739|||C0012739|NCI|||  
DIC|CONSUMPTION COAGULOPATHY|C0012739|||C0012739|DXP|||

DIC|Carboxamide, Dimethyl Imidazole|C0010927|||C0010927|MSH|||  
DIC|Coagulation, Disseminated Intravascular|C0012739|||C0012739|MSH;NDFRT|||  
DIC|Coagulation, Intravascular Disseminated|C0012739|||C0012739|MSH|||  
DIC|Coagulations, Disseminated Intravascular|C0012739|||C0012739|MSH|||  
DIC|Coagulations, Intravascular Disseminated|C0012739|||C0012739|MSH|||  
DIC|Coagulopathies, Consumption|C0012739|||C0012739|MSH|||  
DIC|Coagulopathy, Consumption|C0012739|||C0012739|MSH|||  
DIC|Consumption Coagulopathies|C0012739|||C0012739|MSH|||  
DIC|Consumption Coagulopathy|C0012739|||C0012739|MSH;NDFRT|||  
DIC|Consumption coagulopathy|C0012739|||C0012739|MTHICD9|||  
DIC|Consumptive Coagulopathy|C0012739|||C0012739|NCI|||  
DIC|Consumptive coagulopathy|C0012739|||C0012739|SNOMEDCT|||  
DIC|Consumptive thrombohaemorrhagic disorder|C0012739|||C0012739|SNOMEDCT|||  
DIC|Consumptive thrombohemorrhagic disorder|C0012739|||C0012739|SNOMEDCT|||  
DIC|Consumptive thrombohemorrhagic disorder, NOS|C0012739|||C0012739|SNOMEDCT|||  
DIC|D.I.C.|C0012739|||C0012739|CST|||  
DIC|DACARBAZINE|C0010927|||C0010927|MTHSPL;NCI;NDFRT;VANDF|||  
DIC|DEFIBRINATION SYNDROME|C0012739|||C0012739|DXP|||  
DIC|DIC|||C0010927;C0012739;C1420151|CST;DXP;MSH;NCI;NDFRT;OMIM;PDQ|||  
DIC|DIC - Dacarbazine|C0010927|||C0010927|SNOMEDCT|||  
DIC|DIC - Disseminated intravascular coagulation|C0012739|||C0012739|SNOMEDCT|||  
DIC|DIC SYNDROME|C0012739|||C0012739|DXP|||  
DIC|DIC syndrome|C0012739|||C0012739|MTHICD9;SNOMEDCT|||  
DIC|DIC, DISSEMINATED INTRAVASCULAR COAGULATION|C0012739|||C0012739|NCI|||  
DIC|DICARBOXYLATE ION CARRIER|C1420151|||C1420151|OMIM|||  
DIC|DISSEM COAG INTRAVASC|||C0012739|MSH|||  
DIC|DISSEM INTRAVASC COAG|||C0012739|MSH|||  
DIC|DISSEM. INTRAVASC. COAGULATION|C0005778;C0441509;C1328723|||C0012739|CST|||  
DIC|DISSEMINATED INTRAVASCULAR  
COAGULATION|C0012739|||C0012739|CST;DXP;NCI;QMR|||  
DIC|DISSEMINATED INTRAVASCULAR COAGULATION (DIC)|C0012739|||C0012739|NCI|||  
DIC|DTIC|C0010927|||C0010927|MSH;NCI;NDFRT;PDQ;SNOMEDCT|||  
DIC|DTIC - Dacarbazine|C0010927|||C0010927|SNOMEDCT|||  
DIC|Dacarbazina|C0010927|||C0010927|NCI;PDQ|||  
DIC|Dacarbazine|C0010927|||C0010927|MSH;MTH;MTHSPL;NCI;NDFRT;RXNORM;SNOMEDCT;USP  
MG|||  
DIC|Dacarbazine (DTIC)|C0010927|||C0010927|CHV|||  
DIC|Dacarbazine (product)|||C0010927|SNOMEDCT|||  
DIC|Dacarbazine (substance)|||C0010927|SNOMEDCT|||  
DIC|Dacarbazine - DTIC|C0010927|||C0010927|NCI;PDQ|||  
DIC|Dacarbazine [Chemical/Ingredient]|||C0010927|NDFRT|||  
DIC|Dakarbazin|C0010927|||C0010927|NCI;PDQ|||  
DIC|Decarbazine|C0010927|||C0010927|MSH;NDFRT|||  
DIC|Defibrination syndrome|C0012739|||C0012739|ICD9CM;SNOMEDCT|||  
DIC|Dicentric|C0333710|||C0333710|NCI|||  
DIC|Dicentric Chromosome|C0333710|||C0333710|NCI|||  
DIC|Dicentric chromosome|C0333710|||C0333710|MTH;SNOMEDCT|||  
DIC|Dicentric chromosome (morphologic abnormality)|||C0333710|SNOMEDCT|||  
DIC|Diffuse or disseminated intravascular coagulation|||C0012739|MTHICD9|||  
DIC|Dimethyl (triazeno) imidazolecarboxamide|||C0010927|NCI;PDQ|||  
DIC|Dimethyl Imidazole Carboxamide|C0010927|||C0010927|MSH;NDFRT|||  
DIC|Dimethyl Triazeno Imidazol Carboxamide|C0010927|||C0010927|NCI;PDQ|||  
DIC|Dimethyl Triazeno Imidazole  
Carboxamide|C0010927|||C0010927|MSH;NCI;NDFRT;PDQ|||  
DIC|Dimethyl-triazeno-imidazole carboxamide|C0010927|||C0010927|SNOMEDCT|||  
DIC|Dimethyl-triazeno-imidazole-carboximide|C0010927|||C0010927|NCI|||  
DIC|Dissemin. intravascular coag.|||C0012739|SNOMEDCT|||

DIC|Disseminated Coagulation, Intravascular|C0012739|||C0012739|MSH;NDFRT|||  
DIC|Disseminated Coagulations, Intravascular|C0012739|||C0012739|MSH|||  
DIC|Disseminated Intravascular  
Coagulation|C0012739|||C0012739|MSH;MTH;NCI;NDFRT|||  
DIC|Disseminated Intravascular Coagulation  
[Disease/Finding]|||C0012739|NDFRT|||  
DIC|Disseminated Intravascular Coagulations|C0012739|||C0012739|MSH|||  
DIC|Disseminated intravascular  
coagulation|C0012739|||C0012739|LCH;NCI;OMIM;SNOMEDCT|1|0.8432|  
DIC|Disseminated intravascular coagulation (disorder)|||C0012739|SNOMEDCT|||  
DIC|Haemorrhagic fibrinogenolysis|C0012739|||C0012739|SNOMEDCT|||  
DIC|Hemorrhagic fibrinogenolysis|C0012739|||C0012739|MTHICD9;SNOMEDCT|||  
DIC|ICDT|C0010927|||C0010927|MSH;NDFRT|||  
DIC|INTRAVASC COAG DISSEM|||C0012739|MSH|||  
DIC|INTRAVASC DISSEM COAG|||C0012739|MSH|||  
DIC|INTRAVASCULAR COAGULATION (DIC), DISSEMINATED|C0012739|||C0012739|NCI|||  
DIC|Imidazole Carboxamide Dimethyltriazeno|C0010927|||C0010927|NCI;PDQ|||  
DIC|Imidazole Carboxamide, Dimethyl|C0010927|||C0010927|MSH|||  
DIC|Intravascular Coagulation, Disseminated|C0012739|||C0012739|MSH;NDFRT|||  
DIC|Intravascular Coagulations, Disseminated|C0012739|||C0012739|MSH|||  
DIC|Intravascular Disseminated Coagulation|C0012739|||C0012739|MSH;NDFRT|||  
DIC|Intravascular Disseminated Coagulations|C0012739|||C0012739|MSH|||  
DIC|SLC25A10|C1420151|||C1420151|HUGO;OMIM|||  
DIC|SLC25A10 gene|C1420151|||C1420151|HUGO;MTH|||  
DIC|SOLUTE CARRIER FAMILY 25 (MITOCHONDRIAL CARRIER), MEMBER  
10|||C1420151|OMIM|||  
DIC|consumption coagulopathy|C0012739|||C0012739|CHV|||  
DIC|consumptive coagulopathy|C0012739|||C0012739|CHV|||  
DIC|dacarbazine|C0010927|||C0010927|CHV;CSP;NCI;PDQ|||  
DIC|days in culture|||1|0.0057|  
DIC|defibrination syndrome|C0012739|||C0012739|CHV|||  
DIC|deviance information criterion|||1|0.0057|  
DIC|diagnostic imaging center|||1|  
DIC|dic|||C0333710|NCI|||  
DIC|dicentric|C0333710|||1|  
DIC|dicumarol|C0005640|||C0005640|CHV;CSP;MSH;MTH;NCI;NDFRT;PDQ;RXNORM;SNOMEDCT;  
VANDF|||  
DIC|differential interference contrast|||1|0.0557|1|  
DIC|diffuse intravascular coagulation|||1|  
DIC|diisopropylcarbodiimide|||1|0.0052|  
DIC|dimethyl-triazeno-imidazole carboxamide|C0010927|||C0010927|NCI;PDQ|||  
DIC|dimethyltriazenoimidazole carboxamide|C0010927|||C0010927|CSP|||  
DIC|direct isotope cystography|||1|  
DIC|disposable inner cannula|||1|  
DIC|disseminated intravascular clotting|||1|0.0057|  
DIC|disseminated intravascular  
coagulation|C0012739|1|1.000|C0012739|CSP;CST;DXP;LCH;MSH;MTH;NCI;NDFRT;OMIM;QMR  
;SNOMEDCT|1|0.0041|1|  
DIC|disseminated intravascular coagulation (DIC)|C0012739|||C0012739|CHV|||  
DIC|disseminated intravascular coagulation syndrome|||1|0.0098|  
DIC|disseminated intravascular coagulopathy|||1|0.0449|  
DIC|dissolved inorganic carbon|||1|0.0103|  
DIC|drip infusion cholangiogram|||1|  
DIC|drip infusion cholangiograph|||1|  
DIC|drip infusion cholangiography|||1|0.0036|1|  
DIC|drug information center|||1|0.0062|1|  
DIC|dtic|C0010927|||C0010927|CHV|||

DIC|solute carrier family 25 (mitochondrial carrier; dicarboxylate transporter), member 10|||C1420151|HUGO|||  
DIP|Biomedical Imaging Program|C1511878|||C1511878|NCI|||  
DIP|DEATH-INDUCING PROTEIN|C2266648|||C2266648|OMIM|||  
DIP|DELTA SLEEP-INDUCING PEPTIDE, IMMUNOREACTOR|C1540075|||C1540075|OMIM|||  
DIP|DIP|||C0057737;C0238378;C1511878;C1540075;C2266648;C2826223|DXP;HUGO;MSH;NCI;OMIM|||  
DIP|DIP - Desquamative interstitial pneumonitis|C0238378|||C0238378|SNOMEDCT|||  
DIP|DSIPI|C1540075|||C1540075|OMIM|||  
DIP|Desquamative Interstitial Pneumonia|C0238378|||C0238378|NCI|||  
DIP|Desquamative interstitial pneumonia|C0238378|||C0238378|ICD9CM;MTH;SNOMEDCT|1|0.1189|  
DIP|Desquamative interstitial pneumonia (disorder)|||C0238378|SNOMEDCT|||  
DIP|Desquamative interstitial pneumonitis|C0238378|||C0238378|OMIM;SNOMEDCT|||  
DIP|Desquamativ interst pneu|||C0238378|ICD9CM|||  
DIP|Diagnostic Imaging Program|C1511878|||C1511878|MTH;NCI|||  
DIP|Dip|||C0037390;C0040338|MEDLINEPLUS;NCI|||  
DIP|Dip Dosing Unit|C2826223|||C2826223|MTH;NCI|||  
DIP|GILZ|C1540075|||C1540075|HUGO;OMIM|||  
DIP|GLUCOCORTICOID-INDUCED LEUCINE ZIPPER|||C1540075|OMIM|||  
DIP|GRAM DOMAIN-CONTAINING PROTEIN 4|C2266648|||C2266648|OMIM|||  
DIP|GRAM domain containing 4|||C2266648|HUGO|||  
DIP|GRAMD4|C2266648|||C2266648|HUGO;OMIM|||  
DIP|GRAMD4 gene|C2266648|||C2266648|HUGO;MTH|||  
DIP|ILD, DESQUAMATIVE|C0238378|||C0238378|OMIM|||  
DIP|INTERSTITIAL LUNG DISEASE, DESQUAMATIVE|C0238378|||C0238378|OMIM|||  
DIP|INTERSTITIAL PNEUMONITIS, DESQUAMATIVE, FAMILIAL|C0238378|||C0238378|OMIM|||  
DIP|KIAA0767|C2266648|||C2266648|HUGO;OMIM|||  
DIP|PNEUMONIA, DESQUAMATIVE INTERSTITIAL|C0238378|||C0238378|DXP|||  
DIP|PNEUMONIA, DESQUAMATIVE INTERSTITIAL, FAMILIAL|C0238378|||C0238378|OMIM|||  
DIP|PNEUMONITIS, DESQUAMATIVE INTERSTITIAL, FAMILIAL|C0238378|||C0238378|OMIM|||  
DIP|RBILD|C0238378|||C0238378|NCI|||  
DIP|Resp brncio interst lung|||C0238378|ICD9CM|||  
DIP|Respiratory Bronchiolitis Interstitial Lung Disease|C0238378|||C0238378|NCI|||  
DIP|Respiratory bronchiolitis interstitial lung disease|C0238378|||C0238378|ICD9CM|||  
DIP|Smokeless Tobacco|C0040338|||C0040338|MEDLINEPLUS;MSH;MTH;NCI|||  
DIP|Smokeless Tobaccos|C0040338|||C0040338|MSH|||  
DIP|Smoking, Tobacco and Cancer - Smokeless Tobacco|||C0040338|NCI|||  
DIP|Snuff|C0037390|||C0037390|MEDLINEPLUS;MSH;NCI|||  
DIP|Snuff Tobacco|C0037390|||C0037390|MTH;NCI|||  
DIP|Snuff tobacco|C0037390|||C0037390|SNOMEDCT|||  
DIP|Snuff tobacco (substance)|||C0037390|SNOMEDCT|||  
DIP|Snuffs|C0037390|||C0037390|MSH|||  
DIP|Spit Tobacco|C0008038;C0040338|||C0040338|MEDLINEPLUS|||  
DIP|Spit tobacco|C0008038;C0040338|||C0040338|MEDLINEPLUS|||  
DIP|TOBACCO, SMOKELESS|C0040338|||C0040338|SPN|||  
DIP|TSC-22R|C1540075|||C1540075|HUGO|||  
DIP|TSC22 DOMAIN FAMILY, MEMBER 3|C1540075|||C1540075|OMIM|||  
DIP|TSC22 domain family, member 3|C1540075|||C1540075|HUGO|||  
DIP|TSC22D3|C1540075|||C1540075|HUGO;OMIM|||  
DIP|TSC22D3 gene|C1540075|||C1540075|HUGO;MTH|||  
DIP|Tobacco, Smokeless|C0040338|||C0040338|MEDLINEPLUS;MSH;MTH|||  
DIP|Tobaccos, Smokeless|C0040338|||C0040338|MSH|||  
DIP|death-inducing-protein|C2266648|||C2266648|HUGO|||  
DIP|defective interfering particles|C0011139|||1|0.0213|

DIP|degradable intake protein|||||1|0.0457|  
DIP|desquamative interstitial  
pneumonia|C0238378|1|0.072|C0238378|ICD9CM;MTH;NCI;SNOMEDCT|||1  
DIP|desquamative interstitial pneumonia (DIP)|C0238378|||C0238378|CHV|||  
DIP|desquamative interstitial  
pneumonitis|C0238378|||C0238378|OMIM;SNOMEDCT|1|0.0274|1  
DIP|diazenedicarboxylic acid bis(N'-methylpiperazide)|||C0057737|MSH;MTH|||  
DIP|dichlorophenolindophenol|C0000232|||||1  
DIP|diffuse interstitial pneumonia|||||1  
DIP|diffuse interstitial pneumonitis|||||1  
DIP|digital image processing|||||1|0.0305|  
DIP|digital imaging processing|||||1  
DIP|diisopropyl phosphate|||||1  
DIP|diphtheria toxoid vaccine|C0012551|||||1  
DIP|diploid|C0012568|||||1  
DIP|diplopia|C0012569|||||1  
DIP|dipropionate||1|0.004|||  
DIP|dipyridamole|C0012582|||C0012582|CHV;CSP;LNC;MSH;MTH;MTHSPL;NCI;NDFRT;PDQ;RX  
NORM;SNOMEDCT;USPMG;VANDF|1|0.1768|  
DIP|distal interphalangeal||1|0.924|||1|0.3628|1  
DIP|distal interphalangeal joint|C0932510|||C0932510|CHV;FMA;UWDA|1|0.0549|  
DIP|drip infusion pyelography|||||1|0.0945|  
DIP|drip-infusion pyelogram|||||1  
DIP|drug-induced parkinsonism|C0270729|||C0270729|SNOMEDCT|1|0.0671|1  
DIP|glucocorticoid-induced leucine zipper|||C1540075|HUGO|||  
DIP|hDIP|C1540075|||C1540075|HUGO|||  
DIP|smokeless tobacco|C0040338|||C0040338|AOD;CHV;CSP|||  
DIP|snuff|C0037390|||C0037390|AOD;CHV;CSP|||  
DJD|ARTHRITIS, HYPERTROPHIC|C0029408|||C0029408|DXP|||  
DJD|ARTHRITIS, SENESCENT|C0029408|||C0029408|DXP|||  
DJD|ARTHROPATHY, DEGENERATIVE|C0029408|||C0029408|DXP|||  
DJD|Arthritides, Degenerative|C0029408|||C0029408|MSH|||  
DJD|Arthritis, Degenerative|C0029408|||C0029408|MSH;NDFRT|||  
DJD|DEGENERATIVE JOINT DISEASE|C0029408|||C0029408|DXP|||  
DJD|DJD|C0029408|||C0029408|DXP|||  
DJD|Degenerative Arthritides|C0029408|||C0029408|MSH|||  
DJD|Degenerative Arthritis|C0029408|||C0029408|COSTAR;MSH|||  
DJD|Degenerative Joint Disease|C0029408|||C0029408|AIR;COSTAR;MEDLINEPLUS|||  
DJD|Degenerative arthritis|C0029408|||C0029408|SNOMEDCT|||  
DJD|Degenerative arthritis, NOS|C0029408|||C0029408|SNOMEDCT|||  
DJD|Degenerative arthropathy|C0029408|||C0029408|SNOMEDCT|||  
DJD|Degenerative arthropathy (disorder)|||C0029408|SNOMEDCT|||  
DJD|Degenerative arthropathy, NOS|C0029408|||C0029408|SNOMEDCT|||  
DJD|Degenerative joint  
disease|C0029408|||C0029408|AIR;MEDLINEPLUS;OMIM;SNOMEDCT|||  
DJD|Degenerative joint disease (disorder)|||C0029408|SNOMEDCT|||  
DJD|Degenerative joint disease, NOS|C0029408|||C0029408|SNOMEDCT|||  
DJD|Degenerative polyarthritis|C0029408|||C0029408|MTH;SNOMEDCT|||  
DJD|Degenerative polyarthritis (disorder)|||C0029408|SNOMEDCT|||  
DJD|Degenerative polyarthritis, NOS|C0029408|||C0029408|SNOMEDCT|||  
DJD|Hypertrophic arthritis|C0029408|||C0029408|SNOMEDCT|||  
DJD|Hypertrophic arthritis, NOS|C0029408|||C0029408|SNOMEDCT|||  
DJD|Hypertrophic polyarthritis|C0029408|||C0029408|SNOMEDCT|||  
DJD|Hypertrophic polyarthritis, NOS|C0029408|||C0029408|SNOMEDCT|||  
DJD|JOINT DISEASE, DEGENERATIVE|C0029408|||C0029408|DXP|||  
DJD|Joint degeneration|||C0029408|SNOMEDCT|||  
DJD|OA|C0029408;C2985270|||C0029408|CSP;MEDLINEPLUS;OMIM|||

DJD|OA - Osteoarthritis|C0029408|||C0029408|SNOMEDCT|||  
DJD|OA - Osteoarthrosis|C0029408|||C0029408|SNOMEDCT|||  
DJD|OS1|C0029408|||C0029408|OMIM|||  
DJD|OSTEOARTHRITIS|C0029408|||C0029408|COSTAR;DXP;QMR|||  
DJD|OSTEOARTHRITIS OF HIP, FEMALE-SPECIFIC, SUSCEPTIBILITY  
TO|||C0029408|OMIM|||  
DJD|OSTEOARTHRITIS SUSCEPTIBILITY 1|C0029408|||C0029408|OMIM|||  
DJD|OSTEOARTHROSIS|C0022408;C0029408|||C0029408|DXP;OMIM|||  
DJD|Osteoarthritides|C0029408|||C0029408|MSH|||  
DJD|Osteoarthritis|C0029408|||C0029408|CCS;LCH;MEDLINEPLUS;MSH;NCI;NDFRT;OMIM;SN  
OMEDCT|||  
DJD|Osteoarthritis (& [allied disorders])|||C0029408|SNOMEDCT|||  
DJD|Osteoarthritis (disorder)|||C0029408|SNOMEDCT|||  
DJD|Osteoarthritis NOS|C0029408|||C0029408|SNOMEDCT|||  
DJD|Osteoarthritis NOS (disorder)|||C0029408|SNOMEDCT|||  
DJD|Osteoarthritis NOS, of unspecified site|C0029408|||C0029408|SNOMEDCT|||  
DJD|Osteoarthritis NOS, of unspecified site (disorder)|||C0029408|SNOMEDCT|||  
DJD|Osteoarthritis [Disease/Finding]|||C0029408|NDFRT|||  
DJD|Osteoarthritis and allied disorders|||C0029408|SNOMEDCT|||  
DJD|Osteoarthritis, NOS|C0029408|||C0029408|SNOMEDCT|||  
DJD|Osteoarthroses|C0029408|||C0029408|MSH|||  
DJD|Osteoarthrosis|C0022408;C0029408|||C0029408|MEDLINEPLUS;MSH;NDFRT;OMIM;SNOME  
DCT|||  
DJD|Osteoarthrosis, unspecified whether generalized or  
localized|||C0029408|ICD9CM|||  
DJD|[Joint degeneration] or [osteoarthritis NOS]|||C0029408|SNOMEDCT|||  
DJD|[Joint degeneration] or [osteoarthritis NOS]  
(disorder)|||C0029408|SNOMEDCT|||  
DJD|a o|C0029408|||C0029408|CHV|||  
DJD|arthritis degenerative|||C0029408|CHV|||  
DJD|arthritis osteoarthritis|C0029408|||C0029408|CHV|||  
DJD|arthrosis|C0022408;C0029408|||C0029408|CHV|||  
DJD|arthrosys|||C0029408|CHV|||  
DJD|degenerative arthritis|C0029408|||C0029408|AOD;CHV;CSP|||  
DJD|degenerative arthropathy|C0029408|||C0029408|CHV|||  
DJD|degenerative disease joint|C0029408|||C0029408|CHV|||  
DJD|degenerative disease joints|C0029408|||C0029408|CHV|||  
DJD|degenerative diseases joint|||C0029408|CHV|||  
DJD|degenerative joint  
disease|C0029408|1|1.000|C0029408|AIR;AOD;CHV;COSTAR;CSP;DXP;MEDLINEPLUS;OMIM;SN  
OMEDCT|1|1|1  
DJD|degenerative osteoarthritis|C0029408|||C0029408|CHV|||  
DJD|hypertrophic arthritis|C0029408|||C0029408|CHV;CSP|||  
DJD|o a|C0029408|||C0029408|CHV|||  
DJD|oa osteoarthritis|C0029408|||C0029408|CHV|||  
DJD|oas|C0029408;C0599973|||C0029408|CHV|||  
DJD|osteoarthriti|||C0029408|CHV|||  
DJD|osteoarthrities|||C0029408|CHV|||  
DJD|osteoarthritis|C0029408|||C0029408|AOD;CHV;CSP|||  
DJD|osteoarthritis arthritis|C0029408|||C0029408|CHV|||  
DJD|osteoarthritis degenerative|||C0029408|CHV|||  
DJD|osteoarthrosis|C0022408;C0029408|||C0029408|AOD;CHV|||  
DJD|osteoarthrosys|||C0029408|CHV|||  
DJD|primary OA|C0029408|||C0029408|AIR|||  
DKA|ACIDOSIS DIABETIC|||C0011880|CST|||  
DKA|ACIDOSIS, DIABETIC|C0011880|||C0011880|DXP|||  
DKA|Acidoses, Diabetic|C0011880|||C0011880|MSH|||

DKA|Acidosis, Diabetic|C0011880|||C0011880|MSH;NDFRT|||  
DKA|DIABETIC ACIDOSIS|C0011880|||C0011880|CST|||  
DKA|DIABETIC KETOACIDOSIS|C0011880|||C0011880|NCI;QMR|||  
DKA|DKA|C0011880|||C0011880|DXP|||  
DKA|DKA - Diabetic ketoacidosis|||C0011880|SNOMEDCT|||  
DKA|Diabetes Mellitus with Ketoacidosis|C0011880|||C0011880|COSTAR|||  
DKA|Diabetes mellitus (& [ketoacidosis])|||C0011880|SNOMEDCT|||  
DKA|Diabetes mellitus (& [ketoacidosis]) (disorder)|||C0011880|SNOMEDCT|||  
DKA|Diabetes mellitus NOS with ketoacidosis|C0011880|||C0011880|SNOMEDCT|||  
DKA|Diabetes mellitus NOS with ketoacidosis (disorder)|||C0011880|SNOMEDCT|||  
DKA|Diabetes mellitus with ketoacidosis|C0011880|||C0011880|SNOMEDCT|||  
DKA|Diabetes with ketoacidosis|C0011880|||C0011880|ICD9CM;SNOMEDCT|||  
DKA|Diabetes with ketoacidosis (disorder)|||C0011880|SNOMEDCT|||  
DKA|Diabetic Acidoses|C0011880|||C0011880|MSH|||  
DKA|Diabetic Acidosis|C0011880|||C0011880|MSH;NDFRT|||  
DKA|Diabetic Ketoacidoses|C0011880|||C0011880|MSH|||  
DKA|Diabetic Ketoacidosis|C0011880|||C0011880|MSH;MTH;NCI;NDFRT|||  
DKA|Diabetic Ketoacidosis [Disease/Finding]|||C0011880|NDFRT|||  
DKA|Diabetic Ketoses|C0011880|||C0011880|MSH|||  
DKA|Diabetic Ketosis|C0011880|||C0011880|MSH;NDFRT|||  
DKA|Diabetic acidosis|C0011880|||C0011880|SNOMEDCT|||  
DKA|Diabetic acidosis without coma|C0011880|||C0011880|SNOMEDCT|||  
DKA|Diabetic acidosis, NOS|C0011880|||C0011880|SNOMEDCT|||  
DKA|Diabetic ketoacidosis|C0011880|||C0011880|OMIM;SNOMEDCT|||  
DKA|Diabetic ketosis without coma|C0011880|||C0011880|SNOMEDCT|||  
DKA|KETOACIDOSIS, DIABETIC|C0011880|||C0011880|DXP;NCI|||  
DKA|Ketoacidoses, Diabetic|C0011880|||C0011880|MSH|||  
DKA|Ketoacidosis - diabetic|||C0011880|SNOMEDCT|||  
DKA|Ketoacidosis in diabetes mellitus|C0011880|||C0011880|SNOMEDCT|||  
DKA|Ketoacidosis in diabetes mellitus (disorder)|||C0011880|SNOMEDCT|||  
DKA|Ketoacidosis, Diabetic|C0011880|||C0011880|MSH;NDFRT|||  
DKA|Ketoses, Diabetic|C0011880|||C0011880|MSH|||  
DKA|Ketosis, Diabetic|C0011880|||C0011880|MSH;MTH;NDFRT|||  
DKA|diabetic acidosis|C0011880|||C0011880|CHV;CSP|||  
DKA|diabetic ketoacidoses|C0011880|||C0011880|CHV|||  
DKA|diabetic  
ketoacidosis|C0011880|1|0.998|C0011880|AOD;CHV;CSP;MSH;MTH;NCI;NDFRT;OMIM;QMR;SN  
OMEDCT|1|1|1  
DKA|diabetic ketoses|C0011880|||C0011880|CHV|||  
DKA|diabetic ketosis|C0011880|||C0011880|CHV|||  
DKA|did keep appointment|||||1  
DLCO|Carbon Monoxide Diffusing Capability Test|C1516251|||C1516251|NCI|||  
DLCO|DLCO|C1516251|||C1516251|NCI|||  
DLCO|Diffusion Capacity of the Lung for Carbon Monoxide|||C1516251|NCI|||  
DLCO|PFT/DLCO|||C1516251|NCI|||  
DLCO|Pulmonary Function Test/Carbon Monoxide Diffusing  
Capability|||C1516251|NCI|||  
DLCO|carbon monoxide diffusing capacity|C0199525|||1|0.2274|  
DLCO|carbon monoxide diffusing capacity|||1|0.0669|  
DLCO|diffusing capacity for CO|||1|0.0569|  
DLCO|diffusing capacity for carbon monoxide|||1|0.2709|  
DLCO|diffusing capacity of the lung|||1|0.0334|  
DLCO|diffusing capacity of the lung for carbon monoxide||1|1.000||1|0.1672|  
DLCO|diffusion capacity for carbon monoxide|||1|0.0936|  
DLCO|diffusion capacity of the lung for carbon monoxide|||1|0.0502|  
DLCO|transfer factor|C0040673;C1280474|||1|0.0334|

DM|(11Beta,16alpha)-9-fluoro-11,17,21-trihydroxy-16-methylpregna-1,4-diene-3,20-dione|||C0011777|NCI;PDQ|||  
DM|1-Dehydro-16alpha-methyl-9alpha-fluorohydrocortisone|C0011777||C0011777|NCI;PDQ|||  
DM|16Alpha-methyl-9alpha-fluoro-1,4-pregnadiene-11beta,17alpha,21-triol-3,20-dione|||C0011777|NCI;PDQ|||  
DM|16Alpha-methyl-9alpha-fluoro-delta1-hydrocortisone|C0011777||C0011777|NCI;PDQ|||  
DM|16Alpha-methyl-9alpha-fluoroprednisolone|||C0011777|NCI;PDQ|||  
DM|9Alpha-fluoro-11beta,17alpha,21-trihydroxy-16alpha-methylpregna-1,4-diene-3,20-dione|||C0011777|NCI;PDQ|||  
DM|9Alpha-fluoro-16alpha-methylprednisolone|C0011777||C0011777|NCI;PDQ|||  
DM|9alpha-Fluoro-16alpha-methylprednisolone|C0011777||C0011777|NCI;PDQ|||  
DM|CURSCHMANN-BATTEN-STEINERT SYNDROME|C0027126||C0027126|DXP|||  
DM|Commonwealth of Dominica|C0013013||C0013013|SNOMEDCT|||  
DM|Commonwealth of Dominica (geographic location)|||C0013013|SNOMEDCT|||  
DM|DEXAMETHASONE|C0011777||C0011777|MTHSPL;NCI;NDFRT;VANDF|||  
DM|DM|||C0011777;C0013013;C0027126;C1414085;C1512047;C1704791|HUGO;NCI;OMIM;PDQ|||  
DM|DM - Dystrophia myotonica|C0027126||C0027126|SNOMEDCT|||  
DM|DM KINASE|C0216045;C1414085||C1414085|OMIM|||  
DM|DM PROTEIN KINASE|C0216045;C1414085||C1414085|OMIM|||  
DM|DM protein kinase|C0216045;C1414085||C1414085|HUGO|||  
DM|DM1|||C1414085|HUGO|||  
DM|DM1PK|C1414085||C1414085|HUGO|||  
DM|DMA|C0013013;C0058243;C0301360||C0013013|NCI|||  
DM|DMK|C1414085||C1414085|HUGO;OMIM|||  
DM|DMPK|C1414085||C1414085|HUGO;OMIM|||  
DM|DMPK gene|C1414085||C1414085|HUGO;LNC;MTH|||  
DM|DO|||C0013013|NCI|||  
DM|DOMINICA|C0013013||C0013013|NCI|||  
DM|DXM|C0011777;C0011816;C0350422||C0011777|PDQ|||  
DM|DYSTROPHIA MYOTONICA|C0027126||C0027126|OMIM|||  
DM|DYSTROPHIA MYOTONICA PROTEIN KINASE|C1414085||C1414085|OMIM|||  
DM|DYSTROPHY, MYOTONIC|C0027126||C0027126|DXP|||  
DM|Decimeter|C0439199||C0439199|NCI|||  
DM|Defined Medium|||1|0.0092|  
DM|Demographics|C0011292;C0011298;C1704791||C1704791|NCI|||  
DM|Demographics Domain|C1704791||C1704791|MTH;NCI|||  
DM|Desamethasone|C0011777||C0011777|NCI;PDQ|||  
DM|Descemet membrane|C0011665|||1|  
DM|Descemet's membrane|C0011665|||1|0.0107|  
DM|Desmoplastic Melanoma|C1333280|||1|0.0063|  
DM|Deutschmarks|||1|0.0049|  
DM|Dexamethasone|C0011777||C0011777|LNC;MSH;MTH;MTHSPL;NCI;NDFRT;RXNORM;SNOMEDCT;USPMG|||  
DM|Dexamethasone (product)|||C0011777|SNOMEDCT|||  
DM|Dexamethasone (substance)|||C0011777|SNOMEDCT|||  
DM|Dexamethasone [Chemical/Ingredient]|||C0011777|NDFRT|||  
DM|Dexamethasone [endocrine use]|||C0011777|SNOMEDCT|||  
DM|Dexamethasone [endocrine use] (product)|||C0011777|SNOMEDCT|||  
DM|Dexamethasone [endocrine use] (substance)|||C0011777|SNOMEDCT|||  
DM|Dexamethasone preparation|C0011777||C0011777|SNOMEDCT|||  
DM|Dexamethasone preparation (product)|||C0011777|SNOMEDCT|||  
DM|Dexamethasone preparation (substance)|||C0011777|SNOMEDCT|||  
DM|Dexamethasonum|C0011777||C0011777|NCI;PDQ|||  
DM|Diabetic|C0241863|||1|0.0292|

DM|Disease management|C0039798;C0376636|||||1|0.0185|  
DM|Distant metastasis|C1269798|||||1|0.0209|  
DM|Dominica|C0013013|||C0013013|MSH;MTH;NCI;SNOMEDCT|||  
DM|Dominica (geographic location)|||C0013013|SNOMEDCT|||  
DM|Double Minutes|C1512047|||C1512047|MTH;NCI|||  
DM|Drosophila melanogaster|C0013139|||||1|0.018|  
DM|Dystrophia Myotonica|C0027126|||C0027126|MSH;NDFRT|||  
DM|Dystrophia myotonica|C0027126|||C0027126|MTHICD9;SNOMEDCT|||  
DM|Dystrophies, Myotonic|C0027126|||C0027126|MSH|||  
DM|Dystrophy, Myotonic|C0027126|||C0027126|MSH|||  
DM|Fluoro-9alpha Methyl-16alpha Prednisolone|C0011777|||C0011777|NCI;PDQ|||  
DM|HLA-DM|||||1|0.0088|  
DM|Hexadecadrol|C0011777|||C0011777|MSH;NCI;NDFRT;PDQ|||  
DM|MDPK|C1414085|||C1414085|HUGO|||  
DM|MT-PK|C1414085|||C1414085|HUGO|||  
DM|MYOTONIA ATROPHICA|C0027126|||C0027126|DXP|||  
DM|MYOTONIN-PROTEIN KINASE|C0216045;C1414085|||C1414085|OMIM|||  
DM|Methylfluorprednisolone|C0011777|||C0011777|MSH;NCI;NDFRT;PDQ|||  
DM|Myotonia Atrophica|C0027126|||C0027126|COSTAR;MSH;NDFRT|||  
DM|Myotonia Dystrophica|C0027126|||C0027126|MSH;NDFRT|||  
DM|Myotonia atrophica|C0027126|||C0027126|LCH;MTHICD9|||  
DM|Myotonia dystrophica|C0027126|||C0027126|SNOMEDCT|||  
DM|Myotonic Dystrophies|C0027126|||C0027126|MSH|||  
DM|Myotonic Dystrophy|C0027126|||C0027126|COSTAR;MSH;MTH;NCI;NDFRT|||  
DM|Myotonic Dystrophy [Disease/Finding]|||C0027126|NDFRT|||  
DM|Myotonic dystrophy|C0027126|||C0027126|MTHICD9;SNOMEDCT|1|0.1818|  
DM|NATO code for diphenylaminearsine|||||||1|  
DM|Pregna-1,4-diene-3,20-dione, 9-fluoro-11,17,21-trihydroxy-16-methyl-,  
(11beta,16alpha)-|||C0011777|MSH;NDFRT|||  
DM|STEINERT DIS|||C0027126|MSH|||  
DM|STEINERT DISEASE|C0027126|||C0027126|DXP;OMIM|||  
DM|STEINERTS DIS|||C0027126|MSH|||  
DM|Steinert Disease|C0027126|||C0027126|MSH;NDFRT|||  
DM|Steinert disease|C0027126|||C0027126|SNOMEDCT|||  
DM|Steinert myotonic dystrophy syndrome|C0027126|||C0027126|SNOMEDCT|||  
DM|Steinert myotonic dystrophy syndrome (disorder)|||C0027126|SNOMEDCT|||  
DM|Steinert syndrome|C0027126|||C0027126|SNOMEDCT|||  
DM|Steinert's Disease|C0027126|||C0027126|MSH;NDFRT|||  
DM|Steinert's disease|C0027126|||C0027126|CSP;MTHICD9;SNOMEDCT|||  
DM|Type 2 diabetes|C0011860|||||1|0.0097|  
DM|adamsite|C0070542|||||||1|  
DM|daunomycin|C0011015|||C0011015|CHV;MSH;NCI;NDFRT;PDQ|1|0.0224|  
DM|daunorubicin|C0011015|||||1|0.0044|  
DM|decimeter|C0439199|||C0439199|MTH;NCI;SNOMEDCT|||1|  
DM|decimeter (qualifier value)|||C0439199|SNOMEDCT|||  
DM|decimetre|C0439199|||C0439199|SNOMEDCT|||  
DM|decimorgan|||||||1|  
DM|dehydrated and malnourished|||||||1|  
DM|deltamethrin|C0057233|||||1|0.0044|  
DM|dermatology|C0011627;C1555731|||||||1|  
DM|dermatomyositis|C0011633;C0221056|||C0011633;C0221056|AOD;CHV;COSTAR;CSP;CST;  
DXP;ICD9CM;LCH;MEDLINEPLUS;MSH;MTH;NCI;NDFRT;OMIM;SNOMEDCT|||1|  
DM|dermorphin|C0057492|||||1|0.0049|  
DM|dexamethasone|C0011777|||C0011777|AOD;CHV;CSP;LNC;MSH;MTH;MTHSPL;NCI;NDFRT;PD  
Q;RXNORM;SNOMEDCT;USPMG;VANDF|1|0.0369|  
DM|dexamethasone (DMX)|||C0011777|CHV|||  
DM|dextromaltose|||||||1|

DM|dextromethorphan|C0011816|1|0.572|C0011816|CHV;CSP;LNC;MSH;MTH;MTHSPL;NCI;NDFRT;RXNORM;SNOMEDCT;VANDF|1|0.0739|  
DM|diabetes mellitus|C0011849|1|0.418|C0011849|AIR;AOD;CHV;COSTAR;CSP;CST;DXP;ICD9CM;ICPC;LNC;MEDLINEPLUS;MSH;MTH;NCI;NDFRT;OMIM;QMR;SNOMEDCT|||1  
DM|diabetic group|||1|0.0029|  
DM|diabetic mother|||1|  
DM|diabetic patients|||1|0.0044|  
DM|diabetic rats|||1|0.0024|  
DM|diastolic murmur|C0232262|||C0232262|CHV;MSH;SNOMEDCT|||1  
DM|differentiation medium|||1|0.0039|  
DM|diffuse mixed|||1|  
DM|diffusing capacity of alveolar membrane|||1|  
DM|disease management|C0039798;C0376636|||C0039798;C0376636|CHV;MSH;MTH|||1  
DM|disease steinerts|||C0027126|CHV|||  
DM|distal metastasis|||1|  
DM|distant metastases|||1|0.0175|1  
DM|distant metastasis|C1269798|||C1269798|NCI;SNOMEDCT|||1  
DM|dm|||C0439199|NCI;SNOMEDCT|||  
DM|dm (qualifier value)|||C0439199|SNOMEDCT|||  
DM|dopamine|C0013030;C0201989|||C0013030;C0201989|AOD;CHV;CSP;FMA;LCH;LNC;MSH;MTH;NCI;NDFRT;PDQ;RXNORM;SNOMEDCT;USPMG;UWDA;VANDF|||1  
DM|dorsal medulla|||1|0.0044|  
DM|dorsomedial|||1|0.0267|1  
DM|dorsomedial medulla|||1|0.0068|  
DM|dorsomedial nucleus|C0228329|||1|0.0063|  
DM|dorsomedial nucleus of the intercollicular complex|||1|0.0024|  
DM|dorsomedial visual area|||1|0.0058|  
DM|dose modification|C1707811|||1|  
DM|double membrane|||1|  
DM|double minute|||1|  
DM|double minute chromosomes|||1|0.0058|  
DM|double minutes|C1512047|||C1512047|MTH;NCI|1|0.0146|  
DM|double-muscled|||1|0.0053|  
DM|dry mass|||1|0.0053|  
DM|dry matter|||1|0.2528|1  
DM|dry muscle|||1|0.0034|  
DM|duodenal mucosa|C0227284|||C0227284|FMA;MTH;SNOMEDCT;UWDA|||1  
DM|dura mater|C0013313|||1|0.0044|  
DM|dystrophia myotonica|C0027126|||C0027126|CHV;MSH;MTHICD9;NDFRT;OMIM;SNOMEDCT|1|0.0063|1  
DM|dystrophia myotonica 1|C1414085;C2931688|||C1414085|HUGO|||  
DM|dystrophia myotonica-protein kinase|C1414085|||C1414085|HUGO|||  
DM|dystrophy myotonic|||C0027126|CHV|||  
DM|membrane diffusing capacity|||1|0.0131|1  
DM|method|C0025663;C0449851;C0871511|||1|0.0044|  
DM|myotonia atrophica|C0027126|||C0027126|CHV;CSP|||  
DM|myotonia dystrophica|C0027126|||C0027126|CHV|||  
DM|myotonic dystrophi|||C0027126|CHV|||  
DM|myotonic dystrophy|C0027126|||C0027126|CHV;CSP|||1  
DM|myotonic dystrophy associated protein kinase|||C1414085|HUGO|||  
DM|myotonin protein kinase A|||C1414085|HUGO|||  
DM|patients with dermatomyositis|||1|0.0146|  
DM|patients with diabetes mellitus|||1|0.1215|  
DM|steinert disease|C0027126|||C0027126|CHV|||  
DM|steinert syndrome|C0027126|||C0027126|CHV|||  
DM|steinert's disease|C0027126|||C0027126|CHV|||

DM|syndrome steinert|C0027126|||C0027126|CHV|||  
DM|thymopoietin homolog|C1414085|||C1414085|HUGO|||  
DNA|DNA|C0012854|||C0012854;C1325786|AOD;CHV;CSP;FMA;GO;LNC;MSH;MTH;MTHFDA;NCI;NDFRT;SNOMEDCT;UWDA|||  
DNA|DNA - Deoxyribonucleic acid|C0012854|||C0012854|SNOMEDCT|||  
DNA|DNA [Chemical/Ingredient]|||C0012854|NDFRT|||  
DNA|DNA location|C1325786|||C1325786|GO;MTH|||  
DNA|DNA molecule|C0012854|||C0012854|FMA;UWDA|||  
DNA|Deoxyribonucleic Acid|C0012854|||C0012854|MSH;NCI;NDFRT|||  
DNA|Deoxyribonucleic acid|C0012854|||C0012854|FMA;LCH;NCI;SNOMEDCT;UWDA|||  
DNA|Deoxyribonucleic acid (substance)|||C0012854|SNOMEDCT|||  
DNA|Deoxyribonucleic acid, NOS|C0012854|||C0012854|SNOMEDCT|||  
DNA|Deoxyribonucleic acids|C0012854|||C0012854|MSH;NDFRT|||  
DNA|deoxyribonucleic acid|C0012854|1|1.000|C0012854|AOD;CHV;CSP;FMA;LCH;LNC;MSH;NCI;NDFRT;SNOMEDCT;UWDA|1|1|1|  
DNA|deoxyribonucleic acid (DNA)|C0012854|||C0012854|CHV|||  
DNA|deoxyribonucleic acids|C0012854|||C0012854|CHV|||  
DNA|did not answer|||1|  
DNA|did not attend|||1|  
DNA|dna molecule|C0012854|||C0012854|CHV|||  
DNA|dna molecules|C0012854|||C0012854|CHV|||  
DNA|do not administer|||1|  
DNA|does not apply|||1|  
DNI|do not intubate||1|1.000|||1|  
DNR|(8S-cis)-8-Acetyl-10-[(3-amino-2,3,6-trideoxy-alpha-L-lyxohexopyranosyl)oxy]-7,8,9,10-tetrahydro-6,8,11-trihydroxy-1-methoxy-5,12-naphthacenedione|||C0011015|NCI;PDQ|||  
DNR|5,12-Naphthacenedione, 8-acetyl-10-((3-amino-2,3,6-trideoxy-alpha-L-lyxohexopyranosyl)oxy)-7,8,9,10-tetrahydro-6,8,11-trihydroxy-1-methoxy-, (8S-cis)-|||C0011015|MSH;NDFRT|||  
DNR|5,12-Naphthacenedione, 8-acetyl-10-[(3-amino-2,3,6-trideoxy-.alpha.-L-lyxohexopyranosyl)oxy]-7,8,9,10-tetrahydro-6,8,11-trihydroxy-1-methoxy-, (8S-cis)-|||C0011015|NCI|||  
DNR|DAUNOMYCIN|C0011015|||C0011015|NCI|||  
DNR|DAUNORUBICIN|C0011015|||C0011015|MTHSPL;NCI;NDFRT;VANDF|||  
DNR|DAUNORubicin|C0011015|||C0011015|RXNORM|||  
DNR|DNAR - Do not attempt resuscitation|||C0582114|SNOMEDCT|||  
DNR|DNM|C0011015|||C0011015|PDQ|||  
DNR|DNR|C0011015;C0582114|||C0011015;C0582114|NCI;PDQ;SNOMEDCT|||  
DNR|DNR - Do not resuscitate|C0582114|||C0582114|MTH|||  
DNR|DRB|||C0011015|PDQ|||  
DNR|Dauno Rubidomycine|C0011015|||C0011015|MSH|||  
DNR|Dauno-Rubidomycine|C0011015|||C0011015|MSH;NDFRT;PDQ|||  
DNR|Daunomycin|C0011015|||C0011015|MSH;NCI;NDFRT|||  
DNR|Daunorrubicina|C0011015|||C0011015|NCI|||  
DNR|Daunorubicin|C0011015|||C0011015|MSH;MTH;NCI;NDFRT;RXNORM;SNOMEDCT|||  
DNR|Daunorubicin (product)|||C0011015|SNOMEDCT|||  
DNR|Daunorubicin (substance)|||C0011015|SNOMEDCT|||  
DNR|Daunorubicin [Chemical/Ingredient]|||C0011015|NDFRT|||  
DNR|Department of Natural Resources||1|0.006|||1|  
DNR|Do not resuscitate|C0582114|||C0582114|SNOMEDCT|||  
DNR|L-lyxo-Hexopyranoside, 3.beta.-acetyl-1,2,3,4,6,11-hexahydro-3,5,12-trihydroxy-10-metldioxo-1a-naphthacenyl 3-amino-2,3,6-trideoxy-, .alpha.-|||C0011015|NCI|||  
DNR|Leukaemomycin C|C0011015|||C0011015|NCI|||

DNR|Not for attempted cardiopulmonary  
resuscitation|C0582114|||C0582114|SNOMEDCT|||  
DNR|Not for resuscitation|C0582114|||C0582114|SNOMEDCT|||  
DNR|Not for resuscitation (finding)|||C0582114|SNOMEDCT|||  
DNR|RUBOMYCIN C|C0011015|||C0011015|NCI|||  
DNR|Rubidomycin|C0011015|||C0011015|MSH;NCI;NDFRT;PDQ|||  
DNR|Rubomycin|C0011015|||C0011015|MSH;NDFRT|||  
DNR|Rubomycin C|C0011015|||C0011015|NCI;PDQ|||  
DNR|daunomycin|C0011015|||C0011015|CHV;NCI;PDQ|1|0.0155|  
DNR|daunorubicin|C0011015|||C0011015|CHV;CSP;MSH;MTH;MTHSPL;NCI;NDFRT;PDQ;RXNORM  
;SNOMEDCT;VANDF|1|0.5994|  
DNR|did not respond|||1|1|  
DNR|dnm|C0011015|||C0011015|CHV|||  
DNR|do not report|||1|1|  
DNR|do not resuscitate|C0582114|1|0.994|C0582114;C1547313|HL7V2.5;SNOMEDCT|||1|  
DNR|do-not-resuscitate|C0582114|||1|0.2764|  
DNR|do-not-resuscitate order|C0079252|||C0079252|MSH|||  
DNR|dorsal nerve root|||1|1|  
DNR|dose nonuniformity ratio|||1|1|  
DNR|drb|||C0011015|CHV|||  
DNR|not resuscitate|||1|0.1086|  
DNR|rubidomycin|C0011015|||C0011015|CHV|||  
DNR|rubomycin|C0011015|||C0011015|CHV|||  
DOB|BD|||C0421451|NCI|||  
DOB|BRTHDAT|C0421451|||C0421451|NCI|||  
DOB|Birth Date|C0421451;C0803906|||C0421451|NCI|||  
DOB|Birth date|C0421451;C0803906|||C0421451|LNC|||  
DOB|Bromdimethoxyamphetamine|C0301362|||C0301362|MTH;SNOMEDCT|||  
DOB|Bromdimethoxyamphetamine (substance)|||C0301362|SNOMEDCT|||  
DOB|DOB|C0301362;C0421451|||C0301362;C0421451|NCI;SNOMEDCT|||  
DOB|DOB - Date of birth|C0421451|||C0421451|SNOMEDCT|||  
DOB|Date of Birth|C0421451|||C0421451|NCI|||  
DOB|Date of birth|C0421451|||C0421451|SNOMEDCT|||  
DOB|Date of birth (finding)|||C0421451|SNOMEDCT|||  
DOB|Date of birth (observable entity)|||C0421451|SNOMEDCT|||  
DOB|Date of birth of person cared for|||C0421451|SNOMEDCT|||  
DOB|Date of birth of recipient of care|C0421451|||C0421451|SNOMEDCT|||  
DOB|Date of birth of recipient of care (observable  
entity)|||C0421451|SNOMEDCT|||  
DOB|Dobrava hantavirus|||1|1|  
DOB|Dobutamine|C0012963|||1|1|  
DOB|Patient date of birth|C0421451|||C0421451|MTH;SNOMEDCT|||  
DOB|birth date|C0421451;C0803906|||C0421451|CHV|||  
DOB|birth date of|||C0421451|CHV|||  
DOB|birthDate|C0421451;C0803906|||C0421451|NCI|||  
DOB|births date|C0421451|||C0421451|CHV|||  
DOB|dangle out of bed|||1|1|  
DOB|date of birth|C0421451|1|0.998|C0421451|CHV;NCI;SNOMEDCT|||1|  
DOB|delta over baseline|||1|1|  
DOB|distal occlusal buccal|C0447334|||1|1|  
DOB|doctor's order book|||1|1|  
DOL|day of life||1|1.000|||1|  
DOL|dolorimetric unit|||1|1|  
DP|2,2',2'',2''''-[4,8-Dipiperidinopyrimido-[5,4-d]pyrimidine-2,6-  
diyl)dinitrilo]tetraethanol|||C0012582|NCI;PDQ|||  
DP|CD4+CD8+|C0483191|||1|0.0176|  
DP|CD4+CD8+ double-positive|||1|0.0451|

DP|D-penicillamine|C0030817|||||1|0.0588|  
DP|D.P.|C1512024|||C1512024|NCI|||  
DP|D.P.M.|C1512024|||C1512024|NCI|||  
DP|DIPYRIDAMOLE|C0012582|||C0012582|MTHSPL;NCI;NDFRT;VANDF|||  
DP|DOCKING PROTEIN|C1420414;C1760028|||C1420414|OMIM|||  
DP|DP|||C0012582;C1419059;C1420414;C1512024|HUGO;NCI;OMIM;PDQ|||  
DP|DP1|C1327771;C1384538;C1419059|||C1419059|OMIM|||  
DP|DPM|C1512024;C1634619|||C1512024|NCI|||  
DP|Dermatophagoides Pteronyssinus|C0446330;C1122992|||||1|0.0078|  
DP|Dermatophagoides pteronyssinus|C0446330;C1122992|||||1|0.094|1  
DP|Dipyramidole|C0012582|||C0012582|MSH;NDFRT|||  
DP|Dipyridamole|C0012582|||C0012582|LNC;MSH;MTH;MTHSPL;NCI;NDFRT;RXNORM;SNOMEDCT  
;USPMG|||  
DP|Dipyridamole (product)|||C0012582|SNOMEDCT|||  
DP|Dipyridamole (substance)|||C0012582|SNOMEDCT|||  
DP|Dipyridamole [Chemical/Ingredient)|||C0012582|NDFRT|||  
DP|Doctor of Podiatric Medicine|C1512024|||C1512024|MTH;NCI|||  
DP|Ethanol, 2,2',2'',2'''-(4,8-di-1-piperidinylpyrimido(5,4-d)pyrimidine-2,6-  
diyl)dinitrilo)tetrakis-|||C0012582|MSH;NDFRT|||  
DP|PROSTAGLANDIN D2 RECEPTOR|C0072269;C1419059|||C1419059|OMIM|||  
DP|PROSTANOID DP RECEPTOR|C1419059|||C1419059|OMIM|||  
DP|PTGDR|C1419059|||C1419059|HUGO;OMIM|||  
DP|PTGDR gene|C1419059|||C1419059|HUGO;MTH|||  
DP|Pod.D.|C1512024|||C1512024|NCI|||  
DP|PodD|C1512024|||C1512024|NCI|||  
DP|SIGNAL RECOGNITION PARTICLE  
RECEPTOR|C0074511;C1420414;C1760029|||C1420414|OMIM|||  
DP|SRP-alpha|C1420414|||C1420414|HUGO|||  
DP|SRPR|C1420414|||C1420414|HUGO;OMIM|||  
DP|SRPR gene|C1420414|||C1420414|HUGO;MTH|||  
DP|Sralpha|C1420414|||C1420414|HUGO|||  
DP|dP|||C2599755|LNC;MTH|||  
DP|data processing|C0868941|||C0868941|LCH;MTH;NCI|||1  
DP|debonding pliers|||||||1  
DP|deep pulse|||||||1  
DP|definitive procedure|||||||1  
DP|degradation product|||||||1  
DP|degree of polymerisation|||||1|0.0118|  
DP|degree of polymerization|||||1|0.1156|1  
DP|delayed puberty|C0034012|||||1|0.0059|  
DP|deltopectoral|C0450110|||||||1  
DP|delusional parasitosis|||||1|0.0069|  
DP|dementia praecox|C0036341|||||||1  
DP|dementia pugilistica|C0149843|||||||1  
DP|dense plate|||||||1  
DP|dental prosthesis|C0162686;C1316489|||||||1  
DP|dental prosthodontics|||||||1  
DP|dermal papilla|C0221931;C1282636|||||1|0.0264|  
DP|dermatofibrosarcoma protuberans|C0392784|||||1|0.0118|  
DP|desmoplakin|C0057555;C1414172|||||1|0.0264|  
DP|desquamative pneumonia|||||||1  
DP|developed pressure|||||||1  
DP|dexamethasone pretreatment|||||||1  
DP|diabetes-prone|||||1|0.0754|  
DP|diabetic polyneuropathy|C0271680|||||1|0.0108|  
DP|diaphragmatic plaque|||||||1  
DP|diastolic pressure|C0428883|||||||1

DP|differential pressure||1|0.002|||||  
DP|diffuse precipitation|||||||1  
DP|diffuse pressure|||||||1  
DP|diffusion pressure|||||||1  
DP|digestible protein|||||||1  
DP|diminutive polyp|||||||1  
DP|diphosgene|C0601846|||C0601846|MSH|||1  
DP|diphosphate|C0034320|||C0034320|CHV;CSP|||1  
DP|dipropionate|||||||1  
DP|dipyramidole|C0012582|||C0012582|CHV|||  
DP|dipyridamole|C0012582|||C0012582|CHV;CSP;MTHSPL;NCI;PDQ|1|0.093|  
DP|direct puncture|||||||1  
DP|directed percolation|||||1|0.0157|  
DP|directional preponderance|||||1|0.0235|1  
DP|disability pension|||||||1  
DP|discharge planning|C0012622|||||||1  
DP|discriminating power|||||||1  
DP|disopyramide|C0012702|||||1|0.0411|  
DP|disopyramide phosphate|C0700534|||||1|0.0049|  
DP|displaced person|||||||1  
DP|distal pancreatectomy|C0176940|||C0176940|ICD9CM;NCI;SNOMEDCT|1|0.0118|1  
DP|distal phalanx|C0576464|||C0576464|SNOMEDCT|||1  
DP|distal pit|||||||1  
DP|distopulpal|||||||1  
DP|distortion product|||||1|0.0147|  
DP|donor's plasma|C0860067|||||||1  
DP|dopamine|C0013030;C0201989|||||1|0.0088|  
DP|dorsal|C0205095|||||1|0.0088|  
DP|dorsal prostate|||||1|0.0137|  
DP|dorsalis pedis||1|0.996|||||1  
DP|double pneumonia|||||||1  
DP|double positive|||||1|0.1126|  
DP|double potential|||||1|0.0059|  
DP|double product|||||1|0.0362|  
DP|driving pressure|||||||1  
DP|dry pint|C2348351|||C2348351|HL7V3.0;NCI|||  
DP|dynamic programming|||||1|0.0088|  
DP|dyspnea|C0013404|||||||1  
DP|left ventricular developed pressure|||||1|0.0137|  
DP|patients|C0030705|||||1|0.0147|  
DP|pattern|C0449774|||||1|0.0147|  
DP|phase|C0205390|||||1|0.0088|  
DP|pressures|C0033095;C0460139|||||1|0.0108|  
DP|prostaglandin D2 receptor (DP)|||C1419059|HUGO|||  
DP|protein|C0033684|||||1|0.0118|  
DP|receptor|C0597357|||||1|0.0118|  
DP|signal recognition particle receptor (docking protein)|||C1420414|HUGO|||  
DT|(drug) DT||1|0.006|||||  
DT|2' Deoxythymidine|C0086126|||C0086126|MSH|||  
DT|2'-Deoxythymidine|C0086126|||C0086126|MSH;MTH;NCI|||  
DT|2'-deoxythymidine|C0086126|||C0086126|PDQ|||  
DT|2'-deoxythymidine (dT)|C0086126|||C0086126|CHV|||  
DT|3,4-dihydroxyphenylalaninechrome tautomerase|||C0114832|MSH|||  
DT|BP240|C1539312|||C1539312|HUGO;OMIM|||  
DT|BPA|C1539312|||C1539312|HUGO|||  
DT|BPAG1|C1539312|||C1539312|OMIM|||  
DT|BULLOUS PEMPHIGOID ANTIGEN 1|C1539312|||C1539312|OMIM|||

DT|CATX-15|C1539312|||C1539312|HUGO|||  
DT|CHEMOTHER|||C0013216|MSH|||  
DT|CT - Chemotherapy|C0013216|||C0013216|SNOMEDCT|||  
DT|Chemotherapies|C0013216;C0392920|||C0013216|MSH|||  
DT|Chemotherapy|C0013216;C0013217;C0392920|||C0013216|LCH;LNC;MEDLINEPLUS;MSH;SNOMEDCT|||  
DT|DCT|C0114832;C1413933|||C0114832|NCI|||  
DT|DMH|||C1539312|OMIM|||  
DT|DRUG THER|||C0013216;C0013217|MSH|||  
DT|DST|C0430115;C1539312|||C1539312|HUGO;OMIM|||  
DT|DST gene|C1539312|||C1539312|HUGO;MTH|||  
DT|DT|C0013216|||C0013216;C0013217;C0086126;C0114832;C0305059;C0678226;C1539312|CHV;MSH;NCI;OMIM;SNOMEDCT|||  
DT|DT - Drug therapy|||C0013216|SNOMEDCT|||  
DT|DT toxoid|C0305059|||C0305059|SNOMEDCT|||  
DT|DThyd|C0086126|||C0086126|NCI;PDQ|||  
DT|DYSTONIA MUSCULORUM, MOUSE, HOMOLOG OF|||C1539312|OMIM|||  
DT|DYSTONIN|C1539312|||C1539312|OMIM|||  
DT|Delirium Tremens|C0001957|||1|0.0292|  
DT|Deoxythymidine|C0086126|||C0086126|MSH;NCI|||  
DT|Diphtheria and tetanus toxoid adsorbed|C0305059|||C0305059|MTH;SNOMEDCT|||  
DT|Diphtheria and tetanus toxoid adsorbed (product)|||C0305059|SNOMEDCT|||  
DT|Diphtheria and tetanus toxoid adsorbed (substance)|||C0305059|SNOMEDCT|||  
DT|Dopachrome D-isomerase|C0114832|||C0114832|SNOMEDCT|||  
DT|Dopachrome delta-isomerase|C0114832|||C0114832|SNOMEDCT|||  
DT|Dopachrome isomerase|C0114832|||C0114832|MTH;SNOMEDCT|||  
DT|Dopachrome isomerase (substance)|||C0114832|SNOMEDCT|||  
DT|Drug Therapies|C0013216|||C0013216|MSH|||  
DT|Drug Therapy|C0013216;C0013217|||C0013216|MEDLINEPLUS;MSH;MTH;NCI|||  
DT|Drug therapy|C0013216;C0013217|||C0013216|HL7V3.0;SNOMEDCT|||  
DT|Drug therapy (procedure)|||C0013216|SNOMEDCT|||  
DT|Drug therapy NOS|C0013216;C0013217|||C0013216|SNOMEDCT|||  
DT|Drug therapy NOS (procedure)|||C0013216|SNOMEDCT|||  
DT|Due To|C0678226|||C0678226|NCI|||  
DT|Due to|C0678226|||C0678226|MTH;SNOMEDCT|||  
DT|Due to (attribute)|||C0678226|SNOMEDCT|||  
DT|EC5.3.3.12|C0114832|||C0114832|NCI|||  
DT|FLJ13425|C1539312|||C1539312|HUGO|||  
DT|FLJ21489|C1539312|||C1539312|HUGO|||  
DT|FLJ30627|C1539312|||C1539312|HUGO|||  
DT|FLJ32235|C1539312|||C1539312|HUGO|||  
DT|KIAA0728|C1539312|||C1539312|HUGO|||  
DT|L-Dopachrome Delta-Isomerase|C0114832|||C0114832|NCI|||  
DT|L-Dopachrome Tautomerase|C0114832|||C0114832|NCI|||  
DT|MACF2|C1539312|||C1539312|HUGO|||  
DT|PHARMACOTHER|||C0013216|MSH|||  
DT|Pharmacological Treatment|C0013216|||C0013216|NCI|||  
DT|Pharmacological Treatments|C0013216|||C0013216|NCI|||  
DT|Pharmacotherapies|C0013216|||C0013216|MSH|||  
DT|Pharmacotherapy|C0013216;C0013217|||C0013216|MSH;MTH;NCI|||  
DT|Resulting from|||C0678226|SNOMEDCT|||  
DT|Sabin-Feldman dye test|||1|0.0187|  
DT|Salmonella typhimurium definitive type|||1|0.0047|  
DT|TDR|C0040077;C0086126|||C0040077|PDQ|||  
DT|THER DRUG|||C0013216|MSH|||  
DT|THYMIDINE|C0040077|||C0040077|NCI|||  
DT|TRP-2|C0114832;C1150342|||C0114832|NCI;PDQ|||

DT|TRP-2 protein, tyrosinase-related||||C0114832|MSH|||  
DT|TRP2|C0114832;C1150342;C1421166|||C0114832|NCI|||  
DT|TYRP2|C0114832;C1413933;C2826556|||C0114832|NCI|||  
DT|TdR|C0040077;C0086126|||C0086126|NCI|||  
DT|Therapies, Drug|C0013216|||C0013216|MSH|||  
DT|Therapy, Drug|C0013216;C0013217|||C0013216|MSH|||  
DT|Thymidin|C0040077|||C0040077|NCI|||  
DT|Thymidine|C0040077|||C0040077|LCH;LNC;MSH;MTH;NCI;NDFRT;SNOMEDCT|||  
DT|Thymidine (substance)|||C0040077|SNOMEDCT|||  
DT|Thymidine Deoxyriboside|C0086126|||C0086126|NCI|||  
DT|Thymidine [Chemical/Ingredient]|||C0040077|NDFRT|||  
DT|Treatment With Medication|C0013216|||C0013216|NCI|||  
DT|Tyrosinase-Related Protein 2|C0114832;C1413933|||C0114832|NCI|||  
DT|Tyrosinase-Related Protein-2|C0114832;C1413933|||C0114832|NCI|||  
DT|chemotherapies|C0013216;C0392920|||C0013216|CHV|||  
DT|chemotherapy|C0013216;C0013217;C0392920|||C0013216;C0013217|AOD;CHV;CSP;MSH|||  
|  
DT|chemotherapy procedures|C0013216|||C0013216|CHV|||  
DT|dT|C0013216|||C0040077;C0086126|NCI;PDQ|||  
DT|decayed teeth|C0011334|||1|0.0117|  
DT|deceleration time|||1|0.1146|  
DT|decidual tissue|||1|0.007|  
DT|defibrillation threshold|||1|  
DT|definitive phage type|||1|0.0164|  
DT|delirium  
tremens|C0001957|1|0.258|C0001957|AOD;CHV;COSTAR;CSP;CST;DXP;ICD9CM;MSH;MTHICD9;  
NDFRT;SNOMEDCT|||1  
DT|deoxythymidine|C0086126|||1|0.0234|1  
DT|depression of transmission|||1|  
DT|desmoid tumor|C0079218|||C0079218|CHV;NCI;OMIM;PDQ|1|0.0082|  
DT|developed tension|||1|0.0819|  
DT|dietary thermogenesis|||1|  
DT|differently tested|||1|  
DT|diffraction tomography|||1|0.0105|  
DT|diffusion tension|||1|  
DT|diffusion tensor|||1|0.0491|1  
DT|diltiazem|C0012373|||C0012373|AOD;CHV;CSP;LNC;MSH;MTHSPL;NCI;NDFRT;RXNORM;SNO  
MEDCT;USPMG;VANDF|||  
DT|diphtheria and tetanus toxoids|||1|0.0187|  
DT|diphtheria  
toxin|C0012550|||C0012550|CSP;LCH;MSH;NCI;NDFRT;SNOMEDCT|1|0.2632|1  
DT|diphtheria toxoid|C0012551|||C0012551|CHV;CSP;MSH;NDFRT;SNOMEDCT;VANDF|||  
DT|diphtheria-tetanus||1|0.672||1|0.0257|1  
DT|diploÃ« thickness|||1|  
DT|dipole tracing|||1|0.0105|1  
DT|discharge tomorrow|||1|  
DT|dispensing tablet|||1|  
DT|distal tubule|||1|  
DT|distal tubules|||1|0.0374|  
DT|distance test|||1|  
DT|dopachrome conversion factor|C0114832|||C0114832|MSH|||  
DT|dopachrome isomerase|C0114832|||C0114832|MSH|||  
DT|dopachrome oxidoreductase|C0114832|||C0114832|MSH|||  
DT|dopachrome tautomerase|C0114832;C1413933|||C0114832|MSH|||  
DT|dorsalis tibialis|||1|  
DT|double tachycardia|||1|  
DT|doubling time|C2986483|||C2986483|NCI|1|0.1205|1

DT|drive for thinness|||||1|0.0129|  
DT|drug therapies|C0013216|||C0013216|CHV|||  
DT|drug therapy|C0013216;C0013217|||C0013216;C0013217|AOD;CHV;CSP;MSH;NCI|||  
DT|drug therapy treatment|C0013216|||C0013216|CHV|||  
DT|drug treatment (drug therapy)|||C0013216|AOD|||  
DT|drugs therapies|C0013216|||C0013216|CHV|||  
DT|dt|C0013216|||C2926610|LNC|||  
DT|dt - divisor|C2926610|||C2926610|MTH|||  
DT|due|C0678226;C3146286|||C0678226|CHV|||  
DT|due to|C0678226|||C0678226|CHV|||  
DT|duration of tetany|||||1|  
DT|dye test|C0441697|||C0441697|CHV;LNC;SNOMEDCT|||1|  
DT|dystonia musculorum|||||1|0.0292|  
DT|dystonin|C1539312|||C1539312|HUGO|||  
DT|genetically dystonic|||||1|0.0152|  
DT|impedance detection times|||||1|0.0058|  
DT|medication therapy|C0013216|||C0013216|AOD;CHV|||  
DT|medications therapy|C0013216|||C0013216|CHV|||  
DT|pharmacologic therapy|C0013217|||C0013217|MSH|||  
DT|pharmacotherapeutic|C0013217|||C0013217|MTH|||  
DT|pharmacotherapeutics|C0013216|||C0013216|AOD;CHV|||  
DT|pharmacotherapies|C0013216|||C0013216|CHV|||  
DT|pharmacotherapy|C0013216;C0013217|||C0013216;C0013217|AOD;CHV;CSP;MSH|||  
DT|resulting|C0678226|||C0678226|CHV|||  
DT|resulting from|||C0678226|CHV|||  
DT|therapy medication|C0013216|||C0013216|CHV|||  
DT|threshold|C0449864|||||1|0.0199|  
DT|thymidin|C0040077|||C0040077|CHV;PDQ|||  
DT|thymidine|C0040077|||C0040077|AOD;CHV;CSP;NCI;PDQ|1|0.0398|  
DT|thymidine deoxyriboside|C0086126|||C0086126|PDQ|||  
DT|treatment|C0039798;C0087111;C1522326;C1533734;C1705169;C3161471|||||1|0.0152|  
DT|tyrosinase-related protein-2|C0114832;C1413933|||C0114832|MSH;PDQ|||  
DT|vaccine|C0042210;C1552558|||||1|0.0105|  
DTR|(drug) DTR|1|0.002|||||  
DTR|DIPHtheria TOXIN RECEPTOR|C0058402;C1539630|||C1539630|OMIM|||  
DTR|DT-R|C0058402;C1704816|||C0058402;C1704816|NCI|||  
DTR|DTR|||C0058402;C0489815;C1148175;C1539630;C1704816|LNC;NCI;OMIM|||  
DTR|DTR Gene|C1704816|||C1704816|NCI|||  
DTR|DTR Protein|C0058402|||C0058402|NCI|||  
DTR|DTS|||C0058402;C1704816|NCI|||  
DTR|Deep Tendon Reflex|C0489815|||C0489815|MTH;NCI|||  
DTR|Deep tendon reflex|C0489815|||C0489815|LNC|||  
DTR|Deep tendon reflex of {Reflex location}|C1148175|||C1148175|LNC|||  
DTR|Deep tendon reflex:Find:Pt:{Reflex location}:Ord:Observed|||C1148175|LNC|||  
DTR|Deep tendon reflex:Finding:Point in time:{Reflex location}:Ordinal:Observed|C1148175|||C1148175|LNC;MTH|||  
DTR|Deep tendon reflexes|C0489815|||C0489815|LNC|||  
DTR|Diphtheria Toxin Receptor|C0058402;C1539630|||C0058402|NCI|||  
DTR|Diphtheria Toxin Receptor (Heparin-Binding EGF-Like Growth Factor) Gene|||C1704816|NCI|||  
DTR|Diphtheria Toxin Receptor Gene|C1704816|||C1704816|NCI|||  
DTR|Diphtheria Toxin Sensitivity|C0058402|||C0058402|NCI|||  
DTR|Diphtheria Toxin Sensitivity Gene|C1704816|||C1704816|NCI|||  
DTR|Diphtheria toxin receptor|C0058402;C1539630|||||1|1|  
DTR|Diphtheria toxin receptor (heparin-binding EGF-like growth factor)|||C1539630|HUGO|||  
DTR|HB-EGF|||C0058402;C1704816|NCI|||

DTR|HB-EGF precursor|C0058402|||C0058402|MSH|||  
DTR|HBEGF|C0058402;C1539630|||C0058402;C1539630|HUGO;NCI;OMIM|||  
DTR|HBEGF Gene|C1539630|||C1539630|NCI|||  
DTR|HBEGF gene|C1539630|||C1539630|HUGO;MTH|||  
DTR|HBEGF wt Allele|C1704816|||C1704816|MTH;NCI|||  
DTR|HEGFL|C0058402;C1539630;C1704816|||C0058402;C1539630;C1704816|NCI;OMIM|||  
DTR|HEPARIN-BINDING EGF|C1539630|||C1539630|OMIM|||  
DTR|HEPARIN-BINDING EGF-LIKE GROWTH  
FACTOR|C0058402;C0166825;C1539630|||C1539630|OMIM|||  
DTR|Heparin-Binding EGF-Like Growth  
Factor|C0058402;C0166825;C1539630|||C0058402|NCI|||  
DTR|Heparin-Binding EGF-Like Growth Factor Gene|C1539630|||C1539630|NCI|||  
DTR|Heparin-Binding EGF-Like Growth Factor wt Allele|C1704816|||C1704816|NCI|||  
DTR|LRRC67|C2681647|||C2681647|HUGO|||  
DTR|LRRC67 gene|C2681647|||C2681647|HUGO;MTH|||  
DTR|Myostatic Reflex|C0489815|||C0489815|NCI|||  
DTR|deep reflex tendon|C0489815|||C0489815|CHV|||  
DTR|deep reflexes tendon|C0489815|||C0489815|CHV|||  
DTR|deep tendon reflex|C0489815|1|0.998|C0489815|CHV;LNC;MTH;NCI|||1  
DTR|deep tendon reflexes|C0489815|||C0489815|CHV|||  
DTR|detorubicin|C0057578|||C0057578|MSH;NCI;PDQ|||  
DTR|diphtheria toxin  
receptor|C0058402;C1539630|||C0058402;C1539630|MSH;MTH;NCI;OMIM|||  
DTR|diphtheria toxin receptors|C0058402|||C0058402|MSH|||  
DTR|dtr|||C2681647|HUGO|||  
DTR|heparin-binding EGF-like growth  
factor|C0058402;C0166825;C1539630|||C1539630|HUGO|||  
DTR|heparin-binding epidermal growth factor|C1539630|||C1539630|HUGO|||  
DTR|heparin-binding epidermal growth factor-like growth factor  
precursor|C0058402|||C0058402|MSH|||  
DTR|leucine rich repeat containing 67|||C2681647|HUGO|||  
DTR|receptor, diphtheria toxin|C0058402;C1539630|||C0058402|MSH|||  
DTR|reflexes deep tendon|C0489815|||C0489815|CHV|||  
DUI|DUI|C0683692|||C0683692|AOD|||  
DUI|DUI law|C0683692|||C0683692|CHV|||  
DUI|DUI laws|C0683692|||C0683692|AOD|||  
DUI|doubly uniparental inheritance|||1|0.1358|  
DUI|driving under influence|C0870447|1|1.000|||1|  
DUI|driving under the influence|C0870447|||1|0.5802|  
DUI|driving under the influence laws|C0683692|||C0683692|AOD|||  
DUI|driving under the influence of alcohol|||1|0.284|  
DUI|driving while intoxicated (DUI) law|||C0683692|CHV|||  
DUI|driving while intoxicated laws|||C0683692|AOD|||  
DUI|impaired driving laws|C0683692|||C0683692|AOD|||  
DVT|DEEP THROMBOPHLEBITIS|C0149871;C0151950|||C0149871|CST|||  
DVT|DEEP VEIN THROMBOPHLEBITIS|C0149871|||C0149871|COSTAR|||  
DVT|DEEP VEIN THROMBOSIS|C0149871;C0340708|||C0149871|DXP|||  
DVT|DVT|C0149871;C2926618|||C0149871;C2926618|CHV;DXP;LNC;MEDLINEPLUS;NCI;SNOMED  
CT|||  
DVT|DVT - Deep vein thrombosis|C0149871|||C0149871|SNOMEDCT|||  
DVT|DVT NOS|C0149871;C2926618|||C0149871|MTHICD9|||  
DVT|Deep Vein Thromboses|C0149871|||C0149871|MSH|||  
DVT|Deep Vein  
Thrombosis|C0149871;C0340708|||C0149871|COSTAR;MEDLINEPLUS;MSH;MTH;NCI|||  
DVT|Deep Venous Thromboses|C0149871|||C0149871|MSH|||  
DVT|Deep Venous Thrombosis|C0149871|||C0149871|MSH|||  
DVT|Deep thrombophlebitis|C0149871;C0151950|||C0149871|SNOMEDCT|||

DVT|Deep thrombophlebitis (disorder)|||C0149871|SNOMEDCT|||  
DVT|Deep thrombophlebitis, NOS|C0149871;C0151950|||C0149871|SNOMEDCT|||  
DVT|Deep vein thrombosis|C0149871;C0340708|||C0149871|LNC;OMIM;SNOMEDCT|||  
DVT|Deep vein thrombosis NOS|C0149871;C0340708|||C0149871|MTHICD9|||  
DVT|Deep venous thrombosis|C0149871|||C0149871|OMIM;SNOMEDCT|||  
DVT|Deep venous thrombosis (disorder)|||C0149871|SNOMEDCT|||  
DVT|Deep-Vein Thromboses|C0149871|||C0149871|MSH|||  
DVT|Deep-Vein Thrombosis|C0149871;C0340708|||C0149871|MSH|||  
DVT|Deep-Venous Thromboses|C0149871|||C0149871|MSH|||  
DVT|Deep-Venous Thrombosis|C0149871|||C0149871|MSH|||  
DVT|Ever told by doctor that you had deep venous thrombosis|||C2926618|LNC|||  
DVT|Ever told by doctor that you had deep venous thrombosis:Find:Pt:^Patient:Ord|||C2926618|LNC|||  
DVT|Ever told by doctor that you had deep venous thrombosis:Finding:Point in time:^Patient:Ordinal|C2926618|||C2926618|LNC;MTH|||  
DVT|THROMBOPHLEBITIS DEEP|||C0149871|CST|||  
DVT|THROMBOSIS VENOUS DEEP|C0149871|||C0149871|CST|||  
DVT|Thromboses, Deep Vein|C0149871|||C0149871|MSH|||  
DVT|Thromboses, Deep Venous|C0149871|||C0149871|MSH|||  
DVT|Thromboses, Deep-Vein|C0149871|||C0149871|MSH|||  
DVT|Thromboses, Deep-Venous|C0149871|||C0149871|MSH|||  
DVT|Thrombosis, Deep Vein|C0149871;C0340708|||C0149871|MSH|||  
DVT|Thrombosis, Deep Venous|C0149871|||C0149871|MSH|||  
DVT|Thrombosis, Deep-Vein|C0149871;C0340708|||C0149871|MSH|||  
DVT|Thrombosis, Deep-Venous|C0149871|||C0149871|MSH|||  
DVT|Vein Thromboses, Deep|C0149871|||C0149871|MSH|||  
DVT|Vein Thrombosis, Deep|C0149871;C0340708|||C0149871|MSH|||  
DVT|Venous Thromboses, Deep|C0149871|||C0149871|MSH|||  
DVT|Venous Thrombosis, Deep|C0149871|||C0149871|MSH|||  
DVT|Venous thrombosis -deep|||C0149871|SNOMEDCT|||  
DVT|deep thrombophlebitis|C0149871;C0151950|||C0149871|CHV|||  
DVT|deep vein thrombophlebitis|C0149871|||C0149871|CHV|1|0.006|  
DVT|deep vein thrombophlebitis (DVT)|C0149871|||C0149871|CHV|||  
DVT|deep vein thromboses|C0149871|||C0149871|CHV|1|0.0094|  
DVT|deep vein thrombosis|C0149871;C0340708|1|1.000|C0149871;C0340708|AOD;CHV;COSTAR;CSP;DXP;LNC;MEDLINEPLUS;MSH;MTH;NCI;OMIM;SNOMEDCT|||1  
DVT|deep vein thrombosis (DVT)|C0149871;C0340708|||C0149871|CHV|||  
DVT|deep venous thrombophlebitis|||1|0.0051|  
DVT|deep venous thromboses|C0149871|||C0149871|CHV|1|0.0111|  
DVT|deep venous thrombosis|C0149871|||C0149871|CHV;MSH;OMIM;SNOMEDCT|1|0.9686|  
DVT|deep-vein thrombosis|C0149871;C0340708|||C0149871|CHV|||  
DVT|dvts|C0149871|||C0149871|CHV|||  
DWI|DWI|C0598801;C1171335|||C1171335|CSP|||  
DWI|DWI (diffusion weighted imaging)|||C0598801|CSP|||  
DWI|Diffusion weighted imaging|C0598801|||C0598801|MTH|||  
DWI|Diffusion-weighted|||1|0.0349|  
DWI|Diffusion-weighted magnetic resonance imaging|C2584984|||1|0.0864|  
DWI|Driving While Intoxicated|C1171335|||C1171335|MTH|||  
DWI|diffusion weighted imaging|C0598801|||C0598801|CHV;CSP|||  
DWI|diffusion weighted imaging (DWI)|C0598801|||C0598801|CHV|||  
DWI|diffusion weighted magnetic resonance imaging (DWMRI)|C2584984|||C0598801|CHV|||  
DWI|diffusion-|C0012222;C1696141|||1|0.0216|  
DWI|diffusion-weighted MRI|C1136216|||1|0.1445|  
DWI|diffusion-weighted images|||1|0.0565|  
DWI|diffusion-weighted imaging|C0598801|1|0.016|||1|0.5299|1

DWI|driving under influence of alcohol or drugs|||C1171335|CHV|||  
DWI|driving while impaired||1|0.984|||1|0.0316|1  
DWI|driving while intoxicated|C1171335|||C1171335|CHV|1|0.0947|1  
DWI|driving while intoxicated (DWI)|C1171335|||C1171335|CHV|||  
DWI|dwi|C0598801;C1171335|||C0598801;C1171335|CHV|||  
EBL|Endemic Burkitt's lymphoma|C0343640|||1|0.0642|  
EBL|Estimated blood loss|C1443559;C2926617|||1|0.4404|  
EBL|endemic Burkitt lymphoma|C0343640|||1|  
EBL|endoscopic band ligation|||1|0.1101|1  
EBL|enzootic bovine leukosis|C0085165|||1|0.3853|  
EBL|erythroblastic leukemia|C0023440|||1|  
EBL|estimated blood loss|C1443559;C2926617|1|0.998|||1|  
EBV|Burkitt Herpesvirus|C0014644|||C0014644|MSH|||  
EBV|Burkitt Lymphoma Virus|C0014644|||C0014644|MSH|||  
EBV|Burkitt's Lymphoma Virus|C0014644|||C0014644|MSH|||  
EBV|Burkitt's lymphoma virus|C0014644|||C0014644|CSP|||  
EBV|Burkitts Lymphoma Virus|C0014644|||C0014644|MSH|||  
EBV|E B Virus|C0014644|||C0014644|MSH|||  
EBV|E-B Virus|C0014644|||C0014644|MSH|||  
EBV|E-B Viruses|C0014644|||C0014644|MSH|||  
EBV|EB virus|C0014644|||C0014644|CSP|||  
EBV|EBV|C0014644|||C0014644|AOD;CHV;CSP;MSH;NCI|||  
EBV|EBV - Epstein-Barr virus|C0014644|||C0014644|SNOMEDCT|||  
EBV|Epstein Barr Virus|C0014644|||C0014644|MSH;NCI|||  
EBV|Epstein Barr virus|C0014644|||C0014644|AOD;CSP;LNC|||  
EBV|Epstein-Barr|||1|0.0058|  
EBV|Epstein-Barr Virus|C0014644|||C0014644|MSH;NCI|||  
EBV|Epstein-Barr viral|||1|0.0054|  
EBV|Epstein-Barr virus|C0014644|1|1.000|C0014644|LCH;NCI;SNOMEDCT|1|0.982|1  
EBV|Epstein-Barr virus EBV|C0014644|||C0014644|NCBI|||  
EBV|HERPESVIRUS 4 GAMMA HUMAN|C0014644|||C0014644|MSH|||  
EBV|HERPESVIRUS HUMAN 04|||C0014644|MSH|||  
EBV|HHV 4|C0014644|||C0014644|MSH|||  
EBV|HHV-4|C0014644|||C0014644|MSH|||  
EBV|HUMAN HERPESVIRUS 04|||C0014644|MSH|||  
EBV|HUMAN HERPESVIRUS 4|C0014644|||C0014644|NCI|||  
EBV|Herpesvirus 4 (gamma), Human|||C0014644|MSH|||  
EBV|Herpesvirus 4, Human|C0014644|||C0014644|MSH|||  
EBV|Herpesvirus, Burkitt|C0014644|||C0014644|MSH|||  
EBV|Human (gamma) herpes virus 4|C0598396|||C0014644|SNOMEDCT|||  
EBV|Human Herpesvirus 4|C0014644|||C0014644|MSH;NCI|||  
EBV|Human herpesvirus 4|C0014644|||C0014644|NCBI;SNOMEDCT|||  
EBV|Human herpesvirus 4 (organism)|||C0014644|SNOMEDCT|||  
EBV|Human herpesvirus type 4|C0014644|||C0014644|NCBI|||  
EBV|INFECT MONONUCLEOSIS VIRUS|||C0014644|MSH|||  
EBV|Infectious Mononucleosis Virus|C0014644|||C0014644|MSH|||  
EBV|Infectious Mononucleosis Viruses|C0014644|||C0014644|MSH|||  
EBV|Lymphoma Virus, Burkitt|C0014644|||C0014644|MSH|||  
EBV|Mononucleosis Virus, Infectious|C0014644|||C0014644|MSH|||  
EBV|Mononucleosis Viruses, Infectious|C0014644|||C0014644|MSH|||  
EBV|Virus-Epstein-Barr|C0014644|||C0014644|NCI|||  
EBV|e b virus|C0014644|||C0014644|CHV|||  
EBV|e-b virus|C0014644|||C0014644|CHV|||  
EBV|eb virus|C0014644|||C0014644|CHV|||  
EBV|effective blood volume|||1|  
EBV|electron boost volume|||1|  
EBV|epstein barr virus|C0014644|||C0014644|CHV|||

EBV|epstein barr virus (EBV)|C0014644|||C0014644|CHV|||  
EBV|epstein-barr virus|C0014644|||C0014644|CHV|||  
EBV|estimated blood volume|||1|0.0028|1  
EBV|estimated breeding values|||1|0.0041|  
EBV|herpesvirus 4, human|C0014644|||C0014644|AOD|||  
EBV|human herpesvirus 4 group|C0014644|||C0014644|CSP|||  
EBV|mononucleosis infectious virus|C0014644|||C0014644|CHV|||  
ECG|2R, 3R)-2-(3, 4-dihydroxyphenyl)-5, 7-dihydroxy-chroman-3-yl] 3, 4, 5-trihydroxybenzoate|||C0059422|NCI|||  
ECG|ECG|C1623258|||C0013798;C0059422;C1623258|AOD;CHV;CSP;MSH;NCI;SNOMEDCT|||  
ECG|ECG NOS|C1623258|||C1623258|MTHICD9|||  
ECG|EKG|C0013798;C1623258|||C0013798;C1623258|AOD;CHV;CSP;LNC;MSH;MTH;MTHICD9;NCI;SNOMEDCT|||  
ECG|ELECTROCARDIOGR|||C1623258|MSH|||  
ECG|Electrocardiogram|C0013798;C1547122;C1623258;C1705651|||C0013798;C1623258|CCS;ICD9CM;MSH;MTH;MTHHH;NCI;SNOMEDCT|||  
ECG|Electrocardiogram, NOS|C0013798;C1547122;C1623258;C1705651|||C1623258|SNOMEDCT|||  
ECG|Electrocardiograms|C0013798|||C0013798|MSH|||  
ECG|Electrocardiograph|C0013798;C0180600;C1623258|||C1623258|LCH;LNC|||  
ECG|Electrocardiographic procedure|C1623258|||C1623258|SNOMEDCT|||  
ECG|Electrocardiographic procedure (procedure)|||C1623258|SNOMEDCT|||  
ECG|Electrocardiographic procedure, NOS|C1623258|||C1623258|SNOMEDCT|||  
ECG|Electrocardiographically|||1|0.0043|  
ECG|Electrocardiography|C0013798;C1623258|||C1623258|LCH;MSH;MTH;NCI;SNOMEDCT|||  
ECG|Electrocardiography (procedure)|||C1623258|SNOMEDCT|||  
ECG|Electrocardiography NOS|C0013798;C1623258|||C1623258|SNOMEDCT|||  
ECG|Electrocardiography NOS (procedure)|||C1623258|SNOMEDCT|||  
ECG|Electrocardiography NOS (regime/therapy)|||C1623258|SNOMEDCT|||  
ECG|Epicatechin-3-Gallate|C0059422|||C0059422|MTH;NCI|||  
ECG|Equine Chorionic Gonadotropin|C0018064|||C0018064|NCI|||  
ECG|Equine Gonadotropins|C0018064|||C0018064|MSH;MTH|||  
ECG|Equine gonadotropin|C0018064|||C0018064|NCI|||  
ECG|Gonadotropins, Equine|C0018064|||C0018064|MSH;NDFRT|||  
ECG|Gonadotropins, Equine [Chemical/Ingredient]|||C0018064|NDFRT|||  
ECG|cis-3, 3?, 4?, 5, 7-pentahydroxyflavane 3-gallate|||C0059422|NCI|||  
ECG|eCG|C1623258|||C0018064|NCI|||  
ECG|ecgs|C0013798|||C0013798|CHV|||  
ECG|ekgs|C0013798|||C0013798|CHV|||  
ECG|electrocardiogram|C0013798;C1547122;C1623258;C1705651|||C0013798;C1623258;C1705651|CCS;CHV;CSP;ICD9CM;MSH;MTH;MTHHH;NCI;SNOMEDCT|1|0.6407|1  
ECG|electrocardiogram (EKG, ECG)|||C0013798|CHV|||  
ECG|electrocardiograms|C0013798|||C0013798|CHV|||  
ECG|electrocardiograph|C0013798;C0180600;C1623258|1|1.000|C0013798|CHV|1|0.0216|1  
ECG|electrocardiographic|||1|0.2793|  
ECG|electrocardiography|C0013798;C1623258|||C0013798;C1623258|AOD;CHV;CSP;MTH|||1  
ECG|epicatechin gallate|C0059422|||C0059422|MSH|1|0.0084|  
ECG|epicatechin-3-gallate|C0059422|||C0059422|MSH|||  
ECG|epicatechin-3-galloyl ester|C0059422|||C0059422|MSH|||  
ECG|equine CG|||1|0.0034|  
ECG|equine chorionic gonadotrophin|C0018064|||1|0.0139|  
ECG|equine chorionic gonadotropin|C0018064|||1|0.0182|  
ECG|exercise electrocardiography|||1|0.0103|  
ECMO|ECMO|C0015357|||C0015357|MSH;MTHICD9|||  
ECMO|ECMO (extracorporeal membrane oxygenation)|C0015357|||C0015357|CSP|||

ECMO|ECMO - Extracorporeal membrane oxygenation|C0015357|||C0015357|SNOMEDCT|||  
ECMO|Extracorporeal Membrane Oxygenation|C0015357|||C0015357|MSH;MTH|||  
ECMO|Extracorporeal Membrane Oxygenations|C0015357|||C0015357|MSH|||  
ECMO|Extracorporeal memb oxy|||C0015357|ICD9CM|||  
ECMO|Extracorporeal membrane  
oxygenation|C0015357|||C0015357|MTHICD9;SNOMEDCT|1|0.9852|  
ECMO|Extracorporeal membrane oxygenation (procedure)|||C0015357|SNOMEDCT|||  
ECMO|Extracorporeal membrane oxygenation [ECMO]|C0015357|||C0015357|ICD9CM|||  
ECMO|Extracorporeal membrane oxygenator|||1|0.0148|  
ECMO|Membrane Oxygenation, Extracorporeal|C0015357|||C0015357|MSH|||  
ECMO|Membrane Oxygenations, Extracorporeal|C0015357|||C0015357|MSH|||  
ECMO|Oxygenation, Extracorporeal Membrane|C0015357|||C0015357|MSH|||  
ECMO|Oxygenations, Extracorporeal Membrane|C0015357|||C0015357|MSH|||  
ECMO|ecmo|C0015357|||C0015357|CHV|||  
ECMO|enterocytotoxic monkey orphan|||1|  
ECMO|extracorporeal bypass|C0015357|||C0015357|AOD;CHV|||  
ECMO|extracorporeal membrane  
oxygenation|C0015357|1|1.000|C0015357|AOD;CSP;MSH;MTH;MTHICD9;SNOMEDCT|||1  
ECMO|extracorporeal membrane oxygenation (ECMO)|C0015357|||C0015357|CHV|||  
ECMO|extracorporeal membrane oxygenator|||1|  
EC|(-)-Epicatechin|C0014485;C1881340|||C1881340|NCI|||  
EC|(-)-Epicatechol|||C1881340|NCI|||  
EC|(2R-cis)-2-(3,4-Dihydroxyphenyl)-3,4-dihydro-2H-1-benzopyran-3,5,7-  
triol|||C1881340|NCI|||  
EC|E-CERVIC|C1524042|||C1524042|NCI|||  
EC|E-cadherin|C0042172;C0694872|||1|0.0018|  
EC|EC|||C0013557;C0013593;C1524042;C1881340|MSH;NCI|||  
EC|ECON|||C0013557|MSH|||  
EC|ECU|C0013593|||C0013593|NCI|||  
EC|ECUADOR|C0013593|||C0013593|NCI|||  
EC|ENDOCERVICAL|C0227837;C1550252|||C1524042|NCI|||  
EC|Economic|C0013556;C0013557|||C0013557|MTH|||  
EC|Ecuador|C0013593|||C0013593|AOD;CSP;LCH;MSH;MTH;NCI;SNOMEDCT|||  
EC|Ecuador (geographic location)|||C0013593|SNOMEDCT|||  
EC|Endocervical|C0227837;C1550252|||C1524042|NCI|||  
EC|Endocervical Route of Administration|C1524042|||C1524042|NCI|||  
EC|Endocervical Route of Drug Administration|C1524042|||C1524042|MTH|||  
EC|Energy charge|||1|0.0168|  
EC|Enzyme Commission|C1709239|||1|0.0028|1  
EC|Epicatechin|C0014485;C1881340|||C1881340|NCI|||  
EC|Escherichia coli|C0014834|||1|0.0282|1  
EC|Euro-Collins|||1|  
EC|Euro-Collins solution|C0059905|||1|0.0049|  
EC|Eurocollins|||1|0.0061|  
EC|European Commission|||1|0.0091|  
EC|European Community|C0015179|||1|0.0219|  
EC|Intracervical Route of Administration|C1524042|||C1524042|NCI|||  
EC|L-Epicatechin|C1881340|||C1881340|MTH;NCI|||  
EC|adenocarcinoma|C0001418|||1|0.002|  
EC|committee|C2699414|||1|0.0018|  
EC|complex environment|||1|0.0024|  
EC|concentration|C0086045;C1446561|||1|0.0037|  
EC|contraction|C1140999|||1|0.0026|  
EC|control|C0009932;C0243148;C1550141;C1882979;C2587213|||1|0.0073|  
EC|economics|C0013556;C0013557|||C0013557|MSH|||  
EC|ecuador|C0013593|||C0013593|CHV|||  
EC|effect of closing|||1|



EC|experimental control|||||1  
EC|experimental immune-mediated blepharoconjunctivitis|||||1|0.0028|  
EC|extensor carpi||1|0.004||||  
EC|external carotid|||||1  
EC|external conjugate|C0923007|||||1  
EC|extracapsular|C1517049|||||1  
EC|extracellular|C0521119|||||1|0.0168|1  
EC|extracellular compartment|||||1  
EC|extracellular concentration|||||1  
EC|extracorporeal|C0442087;C1522201|||||1  
EC|extracorporeal circulation|C0015354|||||1|0.0041|  
EC|extracranial|C0580586|||C0580586|CHV;NCI;SNOMEDCT|||1  
EC|extruded cell|||||1  
EC|eye care|C0885957|||||1  
EC|eyes closed|||||1  
ECT|BCECTS|C2363129|||C2363129|MSH|||  
ECT|BECTS|C2363129|||C2363129|MSH;OMIM|||  
ECT|BENIGN EPILEPSY OF CHILDHOOD WITH CENTROTEMPORAL SPIKES|||C2363129|OMIM|||  
ECT|BENIGN ROLANDIC EPILEPSY|C0376532;C2363129|||C2363129|OMIM|||  
ECT|Benign Childhood Epilepsy With Centro Temporal  
Spikes|C2363129|||C2363129|MSH|||  
ECT|Benign Childhood Epilepsy With Centro-Temporal  
Spikes|C2363129|||C2363129|MSH|||  
ECT|Benign Epilepsy With Centrottemporal Spikes|C2363129|||C2363129|MSH|||  
ECT|Benign Rolandic Epilepsy|C0376532;C2363129|||C2363129|MSH;MTH|||  
ECT|Benign Rolandic Epilepsy of Childhood|C2363129|||C2363129|MSH|||  
ECT|Benign Rolandic epilepsy|C0376532;C2363129|||C2363129|SNOMEDCT|||  
ECT|Benign Rolandic epilepsy (disorder)|||C2363129|SNOMEDCT|||  
ECT|CENTRALOPATHIC EPILEPSY|C2363129|||C2363129|OMIM|||  
ECT|CENTROTEMPORAL EPILEPSY|C2363129|||C2363129|OMIM|||  
ECT|CONVULSIVE THER ELECTRIC|||C0013806|MSH|||  
ECT|Centralopathic Epilepsies|C2363129|||C2363129|MSH|||  
ECT|Centralopathic Epilepsy|C2363129|||C2363129|MSH|||  
ECT|Centralopathic epilepsy|C2363129|||C2363129|SNOMEDCT|||  
ECT|Centrottemporal Epilepsies|C2363129|||C2363129|MSH|||  
ECT|Centrottemporal Epilepsy|C2363129|||C2363129|MSH|||  
ECT|Centrottemporal epilepsy|C2363129|||C2363129|SNOMEDCT|||  
ECT|Convulsive Therapies, Electric|C0013806|||C0013806|MSH|||  
ECT|Convulsive Therapy, Electric|C0013806|||C0013806|MSH|||  
ECT|ECS|C0013806|||C0013806|CSP|||  
ECT|ECT|C0013806;C2363129|||C0013806;C2363129|AOD;CSP;MTH;MTHICD9;NCI;OMIM|||  
ECT|ECT (Psychotherapy)|||C0013806|MSH|||  
ECT|ECT - Electroconvulsive therapy|C0013806|||C0013806|SNOMEDCT|||  
ECT|ECT PSYCHOTHER|||C0013806|MSH|||  
ECT|ECT therapy|C0013806|||C0013806|SNOMEDCT|||  
ECT|ELECTROCONVULSIVE THER|||C0013806|MSH|||  
ECT|ELECTROSHOCK THER|||C0013806|MSH|||  
ECT|EST|||C0013806|MTHICD9|||  
ECT|EST - Electroshock treatment|C0013806|||C0013806|SNOMEDCT|||  
ECT|EST therapy|C0013806|||C0013806|SNOMEDCT|||  
ECT|Electric Convulsive Therapies|C0013806|||C0013806|MSH|||  
ECT|Electric Convulsive Therapy|C0013806|||C0013806|MSH|||  
ECT|Electric Shock Therapies|C0013806|||C0013806|MSH|||  
ECT|Electric Shock Therapy|C0013806|||C0013806|MSH|||  
ECT|Electric shock therapy|C0013806|||C0013806|LCH|||  
ECT|Electroconvulsive Therapies|C0013806|||C0013806|MSH|||  
ECT|Electroconvulsive Therapy|C0013806|||C0013806|MSH;MTH;NCI|||

ECT|Electroconvulsive ther.||||C0013806|SNOMEDCT|||  
ECT|Electroconvulsive therapy|C0013806|||C0013806|CCS;MTHICD9;SNOMEDCT|||  
ECT|Electroconvulsive therapy (procedure)|||C0013806|SNOMEDCT|||  
ECT|Electroconvulsive therapy (regime/therapy)|||C0013806|SNOMEDCT|||  
ECT|Electroconvulsive therapy NOS|C0013806|||C0013806|SNOMEDCT|||  
ECT|Electroconvulsive therapy NOS (procedure)|||C0013806|SNOMEDCT|||  
ECT|Electroconvulsive therapy, NOS|C0013806|||C0013806|SNOMEDCT|||  
ECT|Electroconvulsive treatment|C0013806|||C0013806|SNOMEDCT|||  
ECT|Electroplexy|C0013806|||C0013806|SNOMEDCT|||  
ECT|Electroshock Therapies|C0013806|||C0013806|MSH|||  
ECT|Electroshock Therapy|C0013806|||C0013806|MSH|||  
ECT|Electroshock therapy|C0013806|||C0013806|SNOMEDCT|||  
ECT|Electroshock therapy, NOS|C0013806|||C0013806|SNOMEDCT|||  
ECT|Electroshock treatment|C0013806|||C0013806|SNOMEDCT|||  
ECT|Emission computed tomography|C0040398||||1|0.0462|  
ECT|Epilepsies, Centralopathic|C2363129|||C2363129|MSH|||  
ECT|Epilepsies, Centrotemporal|C2363129|||C2363129|MSH|||  
ECT|Epilepsy, Benign Rolandic|C0376532;C2363129|||C2363129|MSH|||  
ECT|Epilepsy, Centralopathic|C2363129|||C2363129|MSH|||  
ECT|Epilepsy, Centrotemporal|C2363129|||C2363129|MSH|||  
ECT|European compression technique|||||||1  
ECT|Rolandic Epilepsy, Benign|C0376532;C2363129|||C2363129|MSH|||  
ECT|SHOCK THER ELECTRIC|||C0013806|MSH|||  
ECT|Shock Therapies, Electric|C0013806|||C0013806|MSH|||  
ECT|Shock Therapy, Electric|C0013806|||C0013806|MSH|||  
ECT|TEMPORAL-CENTRAL FOCAL EPILEPSY|C2363129|||C2363129|OMIM|||  
ECT|Temporal-central focal epilepsy|C2363129|||C2363129|SNOMEDCT|||  
ECT|Therapies, Electric Convulsive|C0013806|||C0013806|MSH|||  
ECT|Therapies, Electric Shock|C0013806|||C0013806|MSH|||  
ECT|Therapies, Electroconvulsive|C0013806|||C0013806|MSH|||  
ECT|Therapies, Electroshock|C0013806|||C0013806|MSH|||  
ECT|Therapy, Electric Convulsive|C0013806|||C0013806|MSH|||  
ECT|Therapy, Electric Shock|C0013806|||C0013806|MSH|||  
ECT|Therapy, Electroconvulsive|C0013806|||C0013806|MSH|||  
ECT|Therapy, Electroshock|C0013806|||C0013806|MSH|||  
ECT|ecarin clotting time||||||1|0.0276|1  
ECT|ecs|C0013806|||C0013806|CHV|||  
ECT|ect|C0013806;C2363129|||C0013806|CHV|||  
ECT|ect therapy|C0013806|||C0013806|CHV|||  
ECT|ectomesenchymal chondromyxoid tumor|||||||1  
ECT|ectopic|C0574895|||||||1  
ECT|eel calcitonin|C0013668||||1|0.0076|  
ECT|electric convulsive therapy|C0013806|||C0013806|CHV|||  
ECT|electric shock therapy|C0013806|||C0013806|CHV|||  
ECT|electric shock treatment|C0013806|||C0013806|AOD;CHV|||  
ECT|electric shock treatments|C0013806|||C0013806|CHV|||  
ECT|electrochemotherapy|C0678054||||1|0.0179|1  
ECT|electroconvulsive shock therapy|C0013806|||C0013806|CHV|||  
ECT|electroconvulsive  
therapy|C0013806|1|1.000|C0013806|AOD;CCS;CHV;CSP;MSH;MTH;MTHICD9;NCI;SNOMEDCT|1  
|0.8592|1  
ECT|electroconvulsive therapy (ECT)|C0013806|||C0013806|CHV|||  
ECT|electroconvulsive treatment|C0013806|||C0013806|CHV|1|0.0331|  
ECT|electroconvulsive treatments|C0013806|||C0013806|CHV|||  
ECT|electroplexy shock therapy|C0013806|||C0013806|AOD|||  
ECT|electroshock therapy|C0013806|||C0013806|AOD;CHV;NCI|||  
ECT|electroshock treatment|C0013806|||C0013806|CHV|||

ECT|emission computed tomography|C0040398|||||1  
ECT|endocurietherapy|||||1|0.0083|  
ECT|enhanced computed tomography|||||1  
ECT|enteric-coated tablet|C0039226|||||1  
ECT|est||||C0013806|CHV|||  
ECT|euglobulin clot test|||||1  
ECT|extended code therapy|||||1  
ECT|extracellular tissue|||||1  
ECT|shock treatment|C0013806|||C0013806|AOD;CHV|||  
ECT|shock treatments|C0013806|||C0013806|CHV|||  
ECT|shocking treatment|C0013806|||C0013806|CHV|||  
EDC|1,2-Dichloroethane|||C0015081|LNC;NCI;SNOMEDCT|||  
EDC|1,2-Dichloroethane (substance)|||C0015081|SNOMEDCT|||  
EDC|1,2-Ethylene Dichloride|||C0015081|NCI|||  
EDC|1,2-dichloroethane|||C0015081|MSH|1|0.031|  
EDC|1-ethyl-3-(3-dimethylaminopropyl) carbodiimide hydrochloride|||||1|0.0172|  
EDC|1-ethyl-3-(3-dimethylaminopropyl) carbodiimide|||||1|0.2379|  
EDC|1-ethyl-3-[3-(dimethylamino)propyl] carbodiimide|||||1|0.0862|  
EDC|1-ethyl-3-[3-(dimethylamino)propyl] carbodiimide hydrochloride|||||1|0.0276|  
EDC|Dichloroethylene|C0012074;C0015081|||C0015081|NCI|||  
EDC|Due Date|C2825543;C3146290|||C2825543|NCI|||  
EDC|Due date|C2825543;C3146290|||C2825543|SNOMEDCT|||  
EDC|EDC|C0015081;C1832097;C2825543|||C0015081;C1832097;C2825543|NCI;OMIM|||  
EDC|EDC - Expected date of confinement|||C2825543|SNOMEDCT|||  
EDC|EDD|C1825027;C2825543|||C2825543|LNC|||  
EDC|EDD - Expected date of delivery|C2825543|||C2825543|SNOMEDCT|||  
EDC|EPIDERMAL DIFFERENTIATION COMPLEX|C1832097|||C1832097|MTH;OMIM|||  
EDC|ETHYLENE DICHLORIDE|C0015081|||C0015081|NCI|||  
EDC|Endocrine disrupting chemicals|C1568245|||||1|0.0483|  
EDC|Estimated date of birth|C2825543|||C2825543|SNOMEDCT|||  
EDC|Estimated date of confinement|C2825543|||C2825543|SNOMEDCT|||  
EDC|Estimated date of delivery|C2741670;C2825543|||C2825543|LNC;SNOMEDCT|||  
EDC|Estimated date of delivery (observable entity)|||C2825543|SNOMEDCT|||  
EDC|Ethane Dichloride|C0015081|||C0015081|NCI|||  
EDC|Ethylene Chloride|C0015081|||C0015081|NCI|||  
EDC|Ethylene Dichloride|C0015081|||C0015081|NCI|||  
EDC|Ethylene dichloride|C0015081|||C0015081|LCH;SNOMEDCT|||  
EDC|Ethylene dichloride (substance)|||C0015081|SNOMEDCT|||  
EDC|Expected Date of Confinement|C2825543|||C2825543|MTH;NCI|||  
EDC|Glycol Dichloride|C0015081|||C0015081|NCI|||  
EDC|N-(3-dimethylaminopropyl)-N'-ethylcarbodiimide|||||1|0.031|  
EDC|baby's due date|C2825543|||C2825543|CHV|||  
EDC|compounds|||||1|0.031|  
EDC|date of confinement|||||1|0.0448|  
EDC|delivery date|C2053594;C2825543|||C2825543|CHV|||  
EDC|due date|C2825543;C3146290|||C2825543|CHV|||  
EDC|effective dynamic compliance|||||1  
EDC|electrodesiccation and curettage|||||1  
EDC|emergency decontamination center|||||1  
EDC|end-diastolic count|||||1  
EDC|endocrine disrupting chemical|||||1  
EDC|epidermal differentiation complex|C1832097|||C1832097|MTH;OMIM|1|0.0448|  
EDC|estimated date of conception|C0425966|1|1.000|C0425966|SNOMEDCT|||1  
EDC|estimated date of confinement|C2825543|||C2825543|CHV;SNOMEDCT|||1  
EDC|estimated date of delivery|C2741670;C2825543|||C2825543|CHV|||  
EDC|estimated delivery date|C2825543|||C2825543|CHV|||  
EDC|ethane, 1,2-dichloro-|||C0015081|MSH|||

EDC|ethanol-derived calories|||||1|0.1172|  
EDC|ethyl cysteinate dimer|C2716486|||||1|  
EDC|ethylene dichloride|C0015081|||C0015081|LCH;MSH;MTH;NCI;SNOMEDCT|1|0.0448|  
EDC|expected date of confinement|C2825543|||||1|  
EDC|expected delivery, cesarean|||||1|  
EDC|extensor digitorum communis|C1707982|||C1707982|NCI|1|0.2379|1  
EDD|DD5|C1825027|||C1825027|HUGO|||  
EDD|Due Date|C2825543;C3146290|||C2825543|NCI|||  
EDD|Due date|C2825543;C3146290|||C2825543|SNOMEDCT|||  
EDD|E3 UBIQUITIN PROTEIN LIGASE, HECT DOMAIN-CONTAINING,  
1|C1825027|||C1825027|OMIM|||  
EDD|EDC|C0015081;C1832097;C2825543|||C2825543|NCI|||  
EDD|EDC - Expected date of confinement|||C2825543|SNOMEDCT|||  
EDD|EDD|C1825027;C2825543|||C1825027;C2825543|HUGO;LNC;OMIM|||  
EDD|EDD - Expected date of delivery|C2825543|||C2825543|SNOMEDCT|||  
EDD|EDD1|C1825027|||C1825027|OMIM|||  
EDD|End-diastolic diameter|||||1|0.2871|  
EDD|Estimated date of birth|C2825543|||C2825543|SNOMEDCT|||  
EDD|Estimated date of confinement|C2825543|||C2825543|SNOMEDCT|||  
EDD|Estimated date of delivery|C2741670;C2825543|||C2825543|LNC;SNOMEDCT|||  
EDD|Estimated date of delivery (observable entity)|||C2825543|SNOMEDCT|||  
EDD|Expected Date of Confinement|C2825543|||C2825543|MTH;NCI|||  
EDD|HYD|C0020402;C1825027|||C1825027|HUGO;OMIM|||  
EDD|HYPERPLASTIC DISCS, DROSOPHILA, HOMOLOG OF|||C1825027|OMIM|||  
EDD|KIAA0896|C1825027|||C1825027|HUGO;OMIM|||  
EDD|PROGESTIN-INDUCED PROTEIN|||C1825027|OMIM|||  
EDD|UBR5|C1825027|||C1825027|HUGO|||  
EDD|UBR5 gene|C1825027|||C1825027|HUGO;MTH|||  
EDD|baby's due date|C2825543|||C2825543|CHV|||  
EDD|date of delivery|||||1|0.1188|  
EDD|delivery date|C2053594;C2825543|||C2825543|CHV|||  
EDD|due date|C2825543;C3146290|||C2825543|CHV|||  
EDD|effective drug duration|||||1|  
EDD|electron-dense deposits|||||1|0.1089|  
EDD|end-diastolic diameter|||||1|  
EDD|end-diastolic dimension|||||1|0.2475|1  
EDD|endothelium-dependent dilation|||||1|0.1287|1  
EDD|enzyme-digested delta|||||1|  
EDD|esophageal detection device|||||1|  
EDD|esophageal detector device|||||1|0.1089|  
EDD|estimated date of confinement|C2825543|||C2825543|CHV|||  
EDD|estimated date of delivery|C2741670;C2825543|||C2825543|CHV|||  
EDD|estimated delivery date|C2825543|||C2825543|CHV|||  
EDD|estimated discharge date|||||1|  
EDD|estimated due date|||||1|  
EDD|expected date of delivery||1|1.000||||1|  
EDD|extended daily dialysis|||||1|  
EDD|ubiquitin protein ligase E3 component n-recognin  
5|C1825027|||C1825027|HUGO|||  
ED|(drug) ED||1|0.002|||||  
ED|A & E - Accident and Emergency Department|||C0562508|SNOMEDCT|||  
ED|AED - Accident and Emergency department|||C0562508|SNOMEDCT|||  
ED|Accident and Emergency department|C0562508|||C0562508|MTH;SNOMEDCT|||  
ED|Accident and Emergency department (environment)|||C0562508|SNOMEDCT|||  
ED|Casualty department|C0562508|||C0562508|SNOMEDCT|||  
ED|Dysfunction, Erectile|C0242350;C1961100|||C0242350|MSH|||

ED|ED|C0242350;C0562508;C1547353|||C0013622;C0242350;C0562508;C1547353|LNC;MEDLINEPLUS;MSH;NCI|||  
ED|EDUC|||C0013622|MSH|||  
ED|EMERGENCY ROOM|C0562508|||C0562508|NCI|||  
ED|Education|C0013621;C0013622;C0013658;C0039401|||C0013622|NCI|||  
ED|Educational aspects|C0013622|||C0013622|MTH|||  
ED|Emergency Department|C0562508|||C0562508|NCI|||  
ED|Emergency Room|C0562508|||C0562508|NCI|||  
ED|Emergency department|C0562508|||C0562508|LNC|||  
ED|Emergency department (DEEDS)|||C0562508|LNC|||  
ED|Emergency room|C0562508|||C0562508|HL7V3.0|||  
ED|Encapsulated Data Data Type|C1547353|||C1547353|NCI|||  
ED|Encapsulated data|C1547353;C1548310|||C1547353|HL7V2.5|||  
ED|Encapsulated data - Data types|C1547353|||C1547353|MTH|||  
ED|Entner-Doudoroff|||1|0.0041|1  
ED|Erectile  
Dysfunction|C0242350;C1961100|||C0242350|MEDLINEPLUS;MSH;NCI;NDFRT|||  
ED|Erectile Dysfunction [Disease/Finding]|||C0242350|NDFRT|||  
ED|Erectile dysfunction|C0242350;C1961100|||C0242350|MTH;NCI;OMIM;SNOMEDCT|||  
ED|Failure of erection|C0242350|||C0242350|SNOMEDCT|||  
ED|IMPOTENCE|C0242350|||C0242350|COSTAR;CST;DXP;NCI|||  
ED|Impotence|C0242350|||C0242350|LCH;MEDLINEPLUS;MSH;MTHICD9;NCI;NDFRT;OMIM;QMR;SNOMEDCT|||  
ED|Impotence (disorder)|||C0242350|SNOMEDCT|||  
ED|Impotence, Male|C0242350|||C0242350|MSH|||  
ED|Impotence, Male Sexual|C0242350|||C0242350|MSH|||  
ED|Impotence, NOS|C0242350|||C0242350|SNOMEDCT|||  
ED|Impotent|C0242350|||C0242350|NCI|||  
ED|Male Erectile Disorder|C0242350|||C0242350|NCI|||  
ED|Male Impotence|C0242350|||C0242350|MSH;NDFRT|||  
ED|Male Sexual Impotence|C0242350|||C0242350|MSH;NDFRT|||  
ED|Male erectile disorder|C0242350|||C0242350|MTHICD9;SNOMEDCT|||  
ED|Male erectile disorder (disorder)|||C0242350|SNOMEDCT|||  
ED|PENILE ERECTION IMPAIRMENT|C0242350|||C0242350|DXP|||  
ED|Sexual Impotence, Male|C0242350|||C0242350|MSH|||  
ED|Sexual impotence|C0242350|||C0242350|SNOMEDCT|||  
ED|Sexual impotence (finding)|||C0242350|SNOMEDCT|||  
ED|Sexual impotence, NOS|C0242350|||C0242350|SNOMEDCT|||  
ED|[X] Male erectile disorder|||C0242350|SNOMEDCT|||  
ED|[X]Male erectile disorder|||C0242350|SNOMEDCT|||  
ED|accident emergency department|C0562508|||C0562508|CHV|||  
ED|deprivation|C0871712|||1|0.0021|  
ED|duration|C0449238;C2926735|||1|0.0023|  
ED|dysfunction erectile|||C0242350|CHV|||  
ED|dysfunction erection|C0242350|||C0242350|CHV|||  
ED|dysfunctioning erectile|||C0242350|CHV|||  
ED|early differentiation|||1|  
ED|early distal|||1|0.0023|  
ED|eating disorder|C0013473|||1|  
ED|eating disorders|C0013473|||1|0.0301|  
ED|ectodermal  
dysplasia|C0013575|||C0013575|CHV;LCH;MSH;MTH;NCI;NDFRT;OMIM;SNOMEDCT|1|0.0044|1  
ED|ectopic depolarization|||1|  
ED|edema|C0013604;C1717255|||1|  
ED|edge detection|||1|  
ED|education|C0013621;C0013622;C0013658;C0039401|||C0013622|MSH|||1  
ED|effective diameter|||1|

ED|effective dose|||||1|0.0048|1  
ED|effector domain|C0682970|||||1|0.0011|  
ED|elbow disarticulation|C0408839|||C0408839|CHV|||1  
ED|electrodiagnosis|C0013816|||||1|  
ED|electrodialysis|C0683122|||C0683122|AOD|1|0.003|1  
ED|electron diffraction|||||1|0.0037|1  
ED|elemental diet|C0012163|||||1|0.0087|1  
ED|embryonic day|||||1|0.0333|  
ED|embryonic death|||||1|  
ED|emergencies room|C0562508|||C0562508|CHV|||  
ED|emergency department|C0562508|1|0.992|C0562508|CHV;LNC;NCI|1|0.5907|1  
ED|emergency room|C0562508|||C0562508|AOD;CHV|||  
ED|emergency rooms|C0562508|||C0562508|CHV|||  
ED|emotional defensiveness|||||1|  
ED|emotional disorder|C0233459|||C0233459|CHV;CSP;MTH;SNOMEDCT|||1  
ED|emotional disturbance|C0013985|||||1|  
ED|emotionally disturbed|C0677660;C0677661|||C0677660;C0677661|CHV;SNOMEDCT|||1  
ED|end diastole|C1562146|||||1|  
ED|end-diastole|C1562146|||||1|0.0119|  
ED|end-diastolic|C0442709|||||1|0.0177|  
ED|endogenous depression|C0011573|||||1|0.0021|  
ED|endolymphatic duct|C0014167|||||1|0.0023|  
ED|energy density|||||1|0.0069|  
ED|enteric drainage|||||1|0.0034|  
ED|entering diagnosis|||||1|  
ED|enumeration district|||||1|0.0023|  
ED|enzyme deficiency|C0149676|||C0149676|CHV;COSTAR;CSP;NCI|||1  
ED|epidural|C0812144|||C0592511;C0812144;C1283259;C1550254|CHV;HL7V2.5;NCI;SNOME  
DCT|||1  
ED|epileptiform discharge|||||1|  
ED|epithelial defect|||||1|  
ED|epithelial dysplasia|C0878500|||||1|0.0037|  
ED|equilibrium dialysis|C1553177|||||1|0.0041|1  
ED|equine dermis|||||1|  
ED|equivalent dose|||||1|  
ED|erectile  
dysfunction|C0242350;C1961100|1|0.002|C0242350;C1961100|CHV;CSP;MEDLINEPLUS;MSH;  
MTH;NCI;NDFRT;OMIM;SNOMEDCT|1|0.2244|1  
ED|erectile dysfunctions|C0242350|||C0242350|CHV|||  
ED|erection dysfunction|C0242350|||C0242350|CHV|||  
ED|erythema dose|||||1|  
ED|erythrocyte deformability|C0014774|||||1|0.0016|  
ED|essential dynamics|||||1|0.0021|  
ED|ethylchloroarsine|||||1|  
ED|ethylenediamine|C0015091|||||1|  
ED|evidence of disease|||||1|  
ED|exertional dyspnea|C0231807|||C0231807|CHV;OMIM;SNOMEDCT|||1  
ED|exit dose|||||1|  
ED|exponential distribution|C1711243|||C1711243|NCI|||  
ED|extensive disease|C0849867|||C0849867|NCI|1|0.0245|1  
ED|extensor  
digitorum|C0224268;C1304999|1|0.002|C0224268;C1304999|CHV;FMA;SNOMEDCT;UWDA|||1  
ED|external diameter|C2314971|||C2314971|SNOMEDCT|1|0.0025|1  
ED|extra-low dispersion|||||1|  
ED|impotence|C0242350|||C0242350|AOD;CHV;CSP;NCI|||  
ED|impotent|C0242350|||C0242350|CHV;NCI|||  
ED|impotents|||C0242350|CHV|||

ED|male erectile disorder|C0242350|||C0242350|AOD;CHV|||  
ED|sexual impotence|C0242350|||C0242350|CHV|||  
EEG|Brain electrical activity|C0234388|||1|0.0033|  
EEG|EEG|C0013819|||C0013819;C1552380;C1611834;C1851758|AOD;CHV;CSP;HL7V3.0;LNC;M  
SH;MTH;NCI;OMIM;SNOMEDCT|||  
EEG|EEG - Electroencephalography|C0013819|||C0013819|SNOMEDCT|||  
EEG|EEG - Technician, Other - NUCCProviderCodes|||C1611834|MTH|||  
EEG|EEG, NOS|C0013819|||C0013819|SNOMEDCT|||  
EEG|ELECTROENCEPHALOGR|||C0013819|MSH|||  
EEG|ELECTROENCEPHALOGRAPHIC PATTERNS|C1851758|||C1851758|MTH;OMIM|||  
EEG|Electroencephalogram|C0013819;C1527380;C1547121;C1704279|||C0013819|ICD9CM;S  
NOMEDCT|||  
EEG|Electroencephalogram  
(EEG)|C0013819;C1527380;C1547121;C1704279|||C0013819|CCS|||  
EEG|Electroencephalogram (procedure)|||C0013819|SNOMEDCT|||  
EEG|Electroencephalogram,  
NOS|C0013819;C1527380;C1547121;C1704279|||C0013819|SNOMEDCT|||  
EEG|Electroencephalographic activity|||1|0.0035|  
EEG|Electroencephalography|C0013819|||C0013819|LCH;MSH;MTH;NCI;SNOMEDCT|1|0.1623  
|  
EEG|Electroencephalography (procedure)|||C0013819|SNOMEDCT|||  
EEG|Specialist / Technologist - EEG|||C1552380|MTH|||  
EEG|eeg electroencephalography|C0013819|||C0013819|CHV|||  
EEG|electrical activity of the brain|||1|0.0011|  
EEG|electro-encephalogram|C1547121|||1|0.0072|  
EEG|electro-encephalographic|||1|0.0037|  
EEG|electroencephalogram|C0013819;C1527380;C1547121;C1704279|||C0013819;C1527380  
;C1704279|CHV;ICD9CM;MSH;MTH;NCI;SNOMEDCT|1|0.4781|1  
EEG|electroencephalograms|C0013819;C1527380|||C0013819|CHV|||  
EEG|electroencephalograph|C0443310|1|1.000|||1|0.0238|1  
EEG|electroencephalographic|||1|0.3099|  
EEG|electroencephalographically|||1|0.002|  
EEG|electroencephalography|C0013819|||C0013819|AOD;CHV;CSP|||1  
EEG|electroencephalography (EEG)|C0013819|||C0013819|CHV|||  
EEG|video-electroencephalographic|||1|0.0026|  
EEG|video-electroencephalography|||1|0.0024|  
EF|early follicular|||1|0.0472|  
EF|eccentric fixation|C0262461|||1|  
EF|ectopic focus|||1|  
EF|edema factor|C0105042;C0962274|||C0105042;C0962274|MSH;MTH;SNOMEDCT|||1  
EF|ejection fraction|C0489482;C2700378|1|0.998|C0489482;C2700378|CHV;LNC|||1  
EF|ejection fractions|||1|0.1639|  
EF|elastic fiber|C0230899|||1|  
EF|elastic fibril|||1|  
EF|elbow flexor||1|0.002|||1  
EF|electric field|C0337037|||C0337037|CHV;CSP;SNOMEDCT|1|0.0861|1  
EF|elongation factor|C0086206|||C0086206|CHV;CSP;MSH|1|0.1722|1  
EF|embryo fibroblast|||1|  
EF|embryofetal|||1|  
EF|emergency facility|||1|  
EF|emotional factor|||1|  
EF|encephalitogenic factor|||1|  
EF|endothoracic fascia|C0225799|||C0225799|FMA;MTH;SNOMEDCT;UWDA|||1  
EF|endurance factor|||1|  
EF|enrichment factors|||1|0.0361|  
EF|enteral feeding|C0086225|||1|0.0167|

EF|eosinophilic  
fasciitis|C0264005|||C0264005|CHV;MTHICD9;OMIM;QMR;SNOMEDCT|1|0.1417|1  
EF|eosinophilic folliculitis|C0744066|||1|0.025|  
EF|epithelial focus|||1|1  
EF|equivalent focus|||1|1  
EF|erectile function|||1|0.0667|  
EF|erythroblastosis  
fetalis|C0014761|||C0014761|CHV;CSP;CST;MSH;NDFRT;SNOMEDCT|||1  
EF|erythrocytic fragmentation|||1|1  
EF|escape focus|||1|1  
EF|essential findings|||1|1  
EF|executive function|C0935584|||1|0.1139|  
EF|executive functioning|C0935584|||1|0.0472|  
EF|exophthalmic factor|||1|1  
EF|exoplasmic face|||1|0.0194|  
EF|exposure factor|||1|1  
EF|extended field|||1|1  
EF|external fixation|C0407333|||1|0.0306|  
EF|extra food|||1|1  
EF|extrafine|||1|1  
EF|extrinsic factor|||1|1  
EF|fluid|C0005889;C0302908;C0444611;C1704353|||1|0.0333|  
EGD|Combined upper GI endoscopy|||C0079304|SNOMEDCT|||  
EGD|EGD|C0079304|||C0079304|AOD;LNC;MTHICD9;NCI|||  
EGD|Endoscopic examination of esophagus, stomach and  
duodenum|||C0079304|SNOMEDCT|||  
EGD|Endoscopic examination of esophagus, stomach and duodenum  
(procedure)|||C0079304|SNOMEDCT|||  
EGD|Endoscopic examination of oesophagus, stomach and  
duodenum|||C0079304|SNOMEDCT|||  
EGD|Endoscopic examination of upper GI tract|||C0079304|SNOMEDCT|||  
EGD|Esophagogastroduodenoscopies|C0079304|||C0079304|MSH|||  
EGD|Esophagogastroduodenoscopy|C0079304|||C0079304|MSH;MTH;MTHICD9;NCI;SNOMEDCT|  
||  
EGD|Esophagogastroduodenoscopy (procedure)|||C0079304|SNOMEDCT|||  
EGD|Fiberoptic esophagogastroduodenoscopy|C0079304|||C0079304|SNOMEDCT|||  
EGD|Fiberoptic esophagogastroduodenoscopy (procedure)|||C0079304|SNOMEDCT|||  
EGD|Fibreoptic oesophagogastroduodenoscopy|C0079304|||C0079304|SNOMEDCT|||  
EGD|Fibreoptic oesophagogastroduodenoscopy (procedure)|||C0079304|SNOMEDCT|||  
EGD|OGD - Esophagogastroduodenoscopy|||C0079304|SNOMEDCT|||  
EGD|OGD - Oesophagogastroduodenoscopy|||C0079304|SNOMEDCT|||  
EGD|Oesophagogastroduodenoscopy|C0079304|||C0079304|SNOMEDCT|||  
EGD|Oesophagogastroduodenoscopy (procedure)|||C0079304|SNOMEDCT|||  
EGD|Upper GI endoscopy|C0079304|||C0079304|SNOMEDCT|||  
EGD|Upper Gastrointestinal endoscopy|C0079304|||C0079304|SNOMEDCT|||  
EGD|Upper gastrointestinal endoscopy|C0079304|||C0079304|MTHMST;SNOMEDCT|||  
EGD|Upper gastrointestinal tract examination|C0079304|||C0079304|MTHMST|||  
EGD|egd|C0079304|||C0079304|CHV|||  
EGD|egds|C0079304|||C0079304|CHV|||  
EGD|endocervical glandular dysplasia|||1|1  
EGD|endoscopy gi upper|||C0079304|CHV|||  
EGD|endoscopy upper gi|C0079304|||C0079304|CHV|||  
EGD|esophagogastroduodenoscopy|C0079304|1|1.000|C0079304|AOD;CHV;CSP;MSH;MTH;MTH  
ICD9;NCI;SNOMEDCT|1|0.9324|1  
EGD|oesophagogastroduodenoscopy|C0079304|||C0079304|CHV|||  
EGD|upper digestive system endoscopy|C0079304|||C0079304|AOD|||  
EGD|upper endoscopy|C0017195|||1|0.0676|

EGD|upper gastrointestinal endoscopy|C0079304|||C0079304|CHV|||  
EGD|upper gi endoscopy|C0079304|||C0079304|CHV|||  
EHL|Environmental Health Laboratory|||||||1  
EHL|Evaporative heat loss|||||1|0.1111|  
EHL|effective half-life|C2986842|||||||1  
EHL|electrohydraulic lithotripsy|C2960072|||C2960072|SNOMEDCT|1|0.5802|1  
EHL|endogenous hyperlipidemia|C0020480|||||||1  
EHL|endoscopic hemorrhoid ligation|||||||1  
EHL|essential hyperlipidemia|||||||1  
EHL|extensor hallucis  
longus|C0224466;C1305069|1|1.000|C0224466;C1305069|CHV;FMA;SNOMEDCT;UWDA|1|0.308  
6|1  
EKG|ECG|C1623258|||C0013798;C1623258|AOD;CHV;CSP;MSH;NCI;SNOMEDCT|||  
EKG|ECG NOS|C1623258|||C1623258|MTHICD9|||  
EKG|EKG|C0013798;C1623258|||C0013798;C1623258|AOD;CHV;CSP;LNC;MSH;MTH;MTHICD9;NC  
I;SNOMEDCT|||  
EKG|ELECTROCARDIOGR|||C1623258|MSH|||  
EKG|Electrocardiogram|C0013798;C1547122;C1623258;C1705651|||C0013798;C1623258|CC  
S;ICD9CM;MSH;MTH;MTHHH;NCI;SNOMEDCT|||  
EKG|Electrocardiogram,  
NOS|C0013798;C1547122;C1623258;C1705651|||C1623258|SNOMEDCT|||  
EKG|Electrocardiograms|C0013798|||C0013798|MSH|||  
EKG|Electrocardiograph|C0013798;C0180600;C1623258|||C1623258|LCH;LNC|||  
EKG|Electrocardiographic procedure|C1623258|||C1623258|SNOMEDCT|||  
EKG|Electrocardiographic procedure (procedure)|||C1623258|SNOMEDCT|||  
EKG|Electrocardiographic procedure, NOS|C1623258|||C1623258|SNOMEDCT|||  
EKG|Electrocardiography|C0013798;C1623258|||C1623258|LCH;MSH;MTH;NCI;SNOMEDCT|||  
EKG|Electrocardiography (procedure)|||C1623258|SNOMEDCT|||  
EKG|Electrocardiography NOS|C0013798;C1623258|||C1623258|SNOMEDCT|||  
EKG|Electrocardiography NOS (procedure)|||C1623258|SNOMEDCT|||  
EKG|Electrocardiography NOS (regime/therapy)|||C1623258|SNOMEDCT|||  
EKG|ecgs|C0013798|||C0013798|CHV|||  
EKG|ekgs|C0013798|||C0013798|CHV|||  
EKG|electrocardiogram|C0013798;C1547122;C1623258;C1705651|||C0013798;C1623258|CH  
V;CSP;NCI|1|0.7135|1  
EKG|electrocardiogram (EKG, ECG)|||C0013798|CHV|||  
EKG|electrocardiograms|C0013798|||C0013798|CHV|||  
EKG|electrocardiograph|C0013798;C0180600;C1623258|1|1.000|C0013798|CHV|||1  
EKG|electrocardiographic|||||1|0.227|  
EKG|electrocardiography|C0013798;C1623258|||C0013798;C1623258|AOD;CHV;CSP;MTH|1|  
0.0595|1  
EMG|ELECTROMYOGR|||C0013839|MSH|||  
EMG|ELECTROMYOGRAPH, DIAGNOSTIC|||C0180677|SPN|||  
EMG|EM-Electromyography|C0013839|||C0013839|SNOMEDCT|||  
EMG|EMG|C0013839|||C0013839;C0180677;C0200204|CHV;CSP;LNC;MTH;MTHICD9;NCI|||  
EMG|EMG - Electromyography|C0013839|||C0013839|SNOMEDCT|||  
EMG|Electromyogram examination of eye|C0200204|||C0200204|SNOMEDCT|||  
EMG|Electromyogram examination of eye (procedure)|||C0200204|SNOMEDCT|||  
EMG|Electromyogram examination of eye (regime/therapy)|||C0200204|SNOMEDCT|||  
EMG|Electromyogram of eye|C0200204|||C0200204|ICD9CM;MTH|||  
EMG|Electromyogram of eye [EMG]|C0200204|||C0200204|ICD9CM|||  
EMG|Electromyographic|||||1|0.7856|  
EMG|Electromyographies|C0013839|||C0013839|MSH|||  
EMG|Electromyographs|C0180677|||C0180677|MTH|||  
EMG|Electromyography|C0013839|||C0013839|ICD9CM;LCH;MSH;MTH;MTHCH;NCI;SNOMEDCT|||  
|  
EMG|Electromyography (procedure)|||C0013839|SNOMEDCT|||

EMG|Electromyography (regime/therapy)|||C0013839|SNOMEDCT|||  
EMG|Electromyography, NOS|C0013839|||C0013839|SNOMEDCT|||  
EMG|Ocular electromyography|C0200204|||C0200204|SNOMEDCT|||  
EMG|Oculoelectromyography with medical  
evaluation|C0200204|||C0200204|SNOMEDCT|||  
EMG|electromyograph||1|1.000|||  
EMG|electromyogram|C2945634|||C2945634|CHV;LNC;SNOMEDCT|1|0.0073|1  
EMG|electromyograph|C0180677|||C0180677|CHV|1|0.0227|1  
EMG|electromyograph (EMG)|C0180677|||C0180677|CHV|||  
EMG|electromyographi|||C0013839|CHV|||  
EMG|electromyographic|||1|1  
EMG|electromyographic activity|||1|0.0491|  
EMG|electromyographical|||1|0.0091|  
EMG|electromyographically|||1|0.0039|  
EMG|electromyographs|C0180677|||C0180677|CHV|||  
EMG|electromyography|C0013839|||C0013839|AOD;CHV;CSP;ICD9CM;LCH;MSH;MTH;MTHCH;NC  
I;SNOMEDCT|||1  
EMG|electromyography emg|C0013839|||C0013839|CHV|||  
EMG|emergency|C0013956;C0175673;C2745965|||1  
EMG|essential monoclonal gammopathy|||1  
EMG|exomphalos, macroglossia, gigantism|||1  
EMG|experimental myasthenia gravis|C0752087|||1|0.0033|  
EMG|eye movement gauge|||1  
EMG|surface electromyogram|||1|0.0555|  
EMG|surface electromyography|C0430815|||1|0.0634|  
EMLA|EMLA|C0059079|||C0059079|CHV;MSH;MTH;NCI;PDQ;RXNORM|||  
EMLA|EMLA [brand name]|C0059079|||C0059079|CHV|||  
EMLA|Eutectic Mixture of Local Anaesthetics|C0059079|||1|0.2267|  
EMLA|Eutectic Mixture of Local Anesthetics|C0059079|||C0059079|MSH;NCI;PDQ|||  
EMLA|eutectic mixture of lidocaine and prilocaine|||1|0.0933|  
EMLA|eutectic mixture of lidocaine and prilocaine (EMLA)|||C0059079|CHV|||  
EMLA|eutectic mixture of local anesthetics|C0059079|1|1.000|||1|0.68|1  
EMS|EMERGENCY MED SERV|||C0013961|MSH|||  
EMS|EMERGENCY SERV MED|||C0013961|MSH|||  
EMS|EMERGENCY SERVICES|C0013961|||C0013961|HCPCS|||  
EMS|EMS|C0013961;C0015063|||C0013961;C0015063|LNC;NCI|||  
EMS|Electromyostimulation|||1|0.0146|  
EMS|Emergency Medical Service|C0013961|||C0013961|MSH|||  
EMS|Emergency Medical  
Services|C0013961;C1555738|||C0013961|MEDLINEPLUS;MSH|1|0.4595|  
EMS|Emergency Service, Medical|C0013961|||C0013961|MSH|||  
EMS|Emergency Services|C0013961|||C0013961|HCPCS|||  
EMS|Emergency Services, Medical|C0013961|||C0013961|MSH|||  
EMS|Emergency medical service|C0013961|||C0013961|MTH|||  
EMS|Emergency medical services|C0013961;C1555738|||C0013961|LCH;SNOMEDCT|||  
EMS|Emergency medical services (qualifier value)|||C0013961|SNOMEDCT|||  
EMS|Emergency service|C0013961|||C0013961|LCH|||  
EMS|Ethyl Mesilate|C0015063|||C0015063|MSH;NDFRT|||  
EMS|Ethyl Mesylate|C0015063|||C0015063|MSH;NDFRT|||  
EMS|Ethyl Methanesulfonate|C0015063|||C0015063|MSH;MTH;NCI;NDFRT|||  
EMS|Ethyl Methanesulfonate [Chemical/Ingredient]|||C0015063|NDFRT|||  
EMS|Ethylmesilate|C0015063|||C0015063|MSH;NDFRT|||  
EMS|Ethylmesylate|C0015063|||C0015063|MSH;NDFRT|||  
EMS|Ethylmethane Sulfonate|C0015063|||C0015063|MSH;NDFRT|||  
EMS|MED SERV EMERGENCY|||C0013961|MSH|||  
EMS|Medical Emergency Service|C0013961|||C0013961|MSH|||  
EMS|Medical Emergency Services|C0013961|||C0013961|MSH|||

EMS|Medical Service, Emergency|C0013961|||C0013961|MSH|||  
EMS|Medical Services, Emergency|C0013961;C1555738|||C0013961|MSH|||  
EMS|Mesilate, Ethyl|C0015063|||C0015063|MSH|||  
EMS|Mesylate, Ethyl|C0015063|||C0015063|MSH|||  
EMS|Methanesulfonate, Ethyl|C0015063|||C0015063|MSH|||  
EMS|Methanesulfonic acid, ethyl ester|C0015063|||C0015063|MSH;NDFRT|||  
EMS|SERV EMERGENCY MED|||C0013961|MSH|||  
EMS|Service, Emergency Medical|C0013961|||C0013961|MSH|||  
EMS|Service, Medical Emergency|C0013961|||C0013961|MSH|||  
EMS|Services, Emergency Medical|C0013961;C1555738|||C0013961|MSH|||  
EMS|Services, Medical Emergency|C0013961|||C0013961|MSH|||  
EMS|Sulfonate, Ethylmethane|C0015063|||C0015063|MSH|||  
EMS|care emergency|C0013961|||C0013961|CHV|||  
EMS|early morning specimen|||1|||1  
EMS|early morning stiffness|||1|||1  
EMS|electrical muscle stimulation|||1|0.0061|1  
EMS|electrical muscle stimulator|||1|||1  
EMS|electrophoretic mobility shift|||1|0.0085|  
EMS|emergency care|C0013961;C0013969;C1527398|||C0013961|CHV|||  
EMS|emergency medical service|C0013961|||C0013961|CHV|||  
EMS|emergency medical services|C0013961;C1555738|1|1.000|C0013961|CHV|||1  
EMS|emergency medical system|||1|0.0195|1  
EMS|emergency service|C0013961|||C0013961|CHV|||  
EMS|empty spiracles|||1|0.0103|  
EMS|encephalo-myo-synangiosis|||1|0.0091|  
EMS|encephalomyosynangiosis|||1|0.0061|1  
EMS|endometriosis|C0014175|||C0014175|CCS;CHV;COSTAR;CSP;CST;DXP;ICD9CM;LCH;MEDL  
INEPLUS;MSH;NCI;NDFRT;OMIM;QMR;SNOMEDCT|||1  
EMS|eosinophilia-myalgia  
syndrome|C0085179|||C0085179|CHV;DXP;MSH;MTH;NDFRT|1|0.0822|1  
EMS|esophageal manometric sequence|||1|||1  
EMS|ethyl methane sulfonate|C0015063|||1|0.0219|  
EMS|ethyl methane sulphonate|C0015063|||1|0.0067|  
EMS|ethyl methanesulfonate|C0015063|||1|0.1862|1  
EMS|ethyl methanesulphonate|C0015063|||1|0.0487|  
EMS|ethylmethane sulfonate|C0015063|||C0015063|MSH;NDFRT|||  
EMS|ethylmethane sulphonate|C0015063|||1|0.0049|  
EMS|ethylmethanesulfonate|C0015063|||1|0.0256|  
EMS|ethylmethanesulphonate|C0015063|||1|0.0103|  
EMS|expandable metallic stent|||1|0.0116|  
EMS|extensive|C0205231|||1|0.0073|  
EMS|extensive metabolisers|||1|0.0116|  
EMS|extensive metabolizers|||1|0.0493|  
EMS|extramedullary site|||1|||1  
EMT|3-Oct|C0083838|||C1420138|HUGO;OMIM|||  
EMT|EMERGENCY MED TECHNICIAN|||C0013963|MSH|||  
EMT|EMERGENCY MED TECHNICIANS|||C0013963|MSH|||  
EMT|EMERGENCY MEDICAL TECHNICIAN|C0013963;C1549968|||C0013963|NCI|||  
EMT|EMT|||C0013963;C0215474;C1367389;C1420138;C1523298;C1706224|AOD;GO;HUGO;NCI  
;OMIM;SNOMEDCT|||  
EMT|EMT (emergency medical technician)|||C0013963|CSP|||  
EMT|EMT ORGANIC CATION TRANSPORTER 3|C1420138|||C1420138|OMIM|||  
EMT|EXTRANEURONAL MONOAMINE TRANSPORTER|C1420138|||C1420138|OMIM|||  
EMT|Emergency Medical Technician|C0013963;C1549968|||C0013963|MSH;NCI|||  
EMT|Emergency Medical Technicians|C0013963|||C0013963|MSH;MTH|||  
EMT|Emergency Medicine Technician|||C0013963|MSH|||  
EMT|Emergency Medicine Technicians|C0013963|||C0013963|MSH|||

EMT|Emergency Paramedic|C0013963|||C0013963|MSH|||  
EMT|Emergency Paramedics|C0013963|||C0013963|MSH|||  
EMT|Emergency medical technician|C0013963;C1549968|||C0013963|SNOMEDCT|||  
EMT|Emergency medical technicians|C0013963|||C0013963|LCH|||  
EMT|Epithelial Mesenchymal Transformation|C1523298|||C1523298|MSH|||  
EMT|Epithelial Mesenchymal Transition|C1523298|||C1523298|MSH|||  
EMT|Epithelial-Mesenchymal Transformation|C1523298|||C1523298|MSH|||  
EMT|Epithelial-Mesenchymal Transformations|C1523298|||C1523298|MSH|||  
EMT|Epithelial-Mesenchymal Transition|C1523298|||C1523298|MSH|||  
EMT|Epithelial-Mesenchymal Transitions|C1523298|||C1523298|MSH|||  
EMT|IL-2-inducible T-cell kinase|C0215474;C1367389|||C0215474|MSH|||  
EMT|IL2-INDUCIBLE T-CELL KINASE|C0215474;C1367389|||C1367389|OMIM|||  
EMT|IL2-Inducible T-Cell Kinase|C0215474;C1367389|||C0215474|NCI|||  
EMT|IL2-Inducible T-Cell Kinase Gene|C1367389|||C1367389|NCI|||  
EMT|IL2-Inducible T-Cell Kinase wt Allele|C1706224|||C1706224|NCI|||  
EMT|IL2-inducible T-cell  
kinase|C0215474;C1367389|||C0215474;C1367389|HUGO;MSH;MTH|||  
EMT|ITK|C1367389|||C1367389|HUGO;NCI;OMIM|||  
EMT|ITK Gene|C1367389|||C1367389|NCI|||  
EMT|ITK gene|C1367389|||C1367389|HUGO;MTH|||  
EMT|ITK wt Allele|C1706224|||C1706224|MTH;NCI|||  
EMT|Kinase EMT|C0215474|||C0215474|NCI|||  
EMT|LYK|C0215474;C1367389;C1706224|||C0215474;C1367389;C1706224|HUGO;NCI|||  
EMT|MED TECHNICIAN EMERGENCY|||C0013963|MSH|||  
EMT|MED TECHNICIANS EMERGENCY|||C0013963|MSH|||  
EMT|Medical Technician, Emergency|C0013963;C1549968|||C0013963|MSH|||  
EMT|Medical Technicians, Emergency|C0013963|||C0013963|MSH|||  
EMT|PSCTK2|||C0215474;C1367389;C1706224|HUGO;NCI|||  
EMT|Paramedic|C0013963;C0030450|||C0013963|SNOMEDCT|||  
EMT|Paramedic (occupation)|||C0013963|SNOMEDCT|||  
EMT|Paramedic, Emergency|C0013963|||C0013963|MSH|||  
EMT|Paramedics, Emergency|C0013963|||C0013963|MSH|||  
EMT|SLC22A3|C1420138|||C1420138|HUGO;OMIM|||  
EMT|SLC22A3 gene|C1420138|||C1420138|HUGO;MTH|||  
EMT|SOLUTE CARRIER FAMILY 22 (EXTRANEURONAL MONOAMINE TRANSPORTER), MEMBER  
3|||C1420138|OMIM|||  
EMT|T-CELL ITK/TSK TYROSINE KINASE, MOUSE, HOMOLOG OF|||C1367389|OMIM|||  
EMT|T-Cell ITK/TSK Homolog|||C0215474|NCI|||  
EMT|T-Cell-Specific Kinase|C0215474|||C0215474|NCI|||  
EMT|T-cell-specific kinase|C0215474|||C0215474|MSH|||  
EMT|TECHNICIAN EMERGENCY MED|||C0013963|MSH|||  
EMT|TECHNICIANS EMERGENCY MED|||C0013963|MSH|||  
EMT|TYROSINE KINASE EXPRESSED MAINLY IN T CELLS|||C1367389|OMIM|||  
EMT|Technician, Emergency Medical|C0013963;C1549968|||C0013963|MSH|||  
EMT|Technician, Emergency Medicine|||C0013963|MSH|||  
EMT|Technicians, Emergency Medical|C0013963|||C0013963|MSH|||  
EMT|Technicians, Emergency Medicine|C0013963|||C0013963|MSH|||  
EMT|Transformation, Epithelial-Mesenchymal|C1523298|||C1523298|MSH|||  
EMT|Transformations, Epithelial-Mesenchymal|C1523298|||C1523298|MSH|||  
EMT|Transition, Epithelial-Mesenchymal|C1523298|||C1523298|MSH|||  
EMT|Transitions, Epithelial-Mesenchymal|C1523298|||C1523298|MSH|||  
EMT|Tyrosine-Protein Kinase ITK/TSK|||C0215474|NCI|||  
EMT|Tyrosine-Protein Kinase LYK|C0215474|||C0215474|NCI|||  
EMT|electronic medical textbook|||1  
EMT|emergency medical tag|C0013962|||1

EMT|emergency medical technician|C0013963;C1549968|1|1.000|C0013963;C1549968|AOD;CHV;HL7V2.5;MSH;NCI;SNOMEDCT|1|0.1744|

EMT|emergency medical technician (EMT)|C0013963;C1549968|||C0013963|CHV|||

EMT|emergency medical technicians|C0013963|||C0013963|CHV|||

EMT|emergency medical treatment|||1

EMT|emt|||C0013963|CHV|||

EMT|emt protein-tyrosine kinase|C0215474|||C0215474|MSH|||

EMT|endocardial mapping technique|||1

EMT|epithelial to mesenchymal transition|C1523298|||C1523298|GO;MTH|1|0.1385|

EMT|epithelial-mesenchymal transdifferentiation|||1|0.0308|

EMT|epithelial-mesenchymal transformation|C1523298|||1|0.1538|

EMT|epithelial-mesenchymal transition|C1523298|||C1523298|GO|1|0.3641|

EMT|extraneuronal monoamine transporter|C1420138|||1|0.0923|

EMT|inducible T cell kinase|C0215474|||C0215474|MSH|||

EMT|interleukin-2 tyrosine kinase|C0215474|||C0215474|MSH|||

EMT|mesenchymal to epithelial transition|C1523298|||C1523298|GO|||

EMT|mesenchymal-epithelial transition|C1523298|||C1523298|GO|||

EMT|solute carrier family 22 (extraneuronal monoamine transporter), member 3|||C1420138|HUGO|||

EMT|transitions|||1|0.0462|

ENT|\*Entitic|C1304535|||C1304535|HL7V2.5|||

ENT|5'-nucleotidase, ecto (CD73)|||C1417861|HUGO|||

ENT|CD73|C1417861|||C1417861|HUGO;OMIM|||

ENT|E5NT|C1417861|||C1417861|OMIM|||

ENT|ECTO-5-PRIME NUCLEOTIDASE|C1417861|||C1417861|OMIM|||

ENT|ENT|||C0150934;C1274038;C1304535;C1417861|CHV;LNC;OMIM;SNOMEDCT|||

ENT|Ear, Nose and Throat|C0150934|||C0150934|MEDLINEPLUS|||

ENT|Ear, nose and throat|C0150934|||C0150934|AIR;MTH;SNOMEDCT|||

ENT|Ear, nose and throat structure|||C0150934|SNOMEDCT|||

ENT|Ear, nose and throat structure (body structure)|||C0150934|SNOMEDCT|||

ENT|Ear, nose and throat surgery|C1274038|||C1274038|MTH;SNOMEDCT|||

ENT|Ear, nose and throat surgery (qualifier value)|||C1274038|SNOMEDCT|||

ENT|Entitic|C1304535|||C1304535|MTH;SNOMEDCT|||

ENT|Entitic (property)|||C1304535|SNOMEDCT|||

ENT|Entitic (property) (qualifier value)|||C1304535|SNOMEDCT|||

ENT|NT5|C1417861;C1417863|||C1417861|OMIM|||

ENT|NT5E|C1417861|||C1417861|HUGO;OMIM|||

ENT|NT5E gene|C1417861|||C1417861|HUGO;MTH|||

ENT|NTE|C1417861;C1826637|||C1417861|OMIM|||

ENT|NUCLEOTIDASE, ECTO-5-PRIME|C1417861|||C1417861|OMIM|||

ENT|eN|C1417861;C2987294|||C1417861|HUGO|||

ENT|eNT|||C1417861|HUGO|||

ENT|ear nose and throat|C0150934|||1|0.0612|

ENT|ear nose and throat (ENT) surgery|C1274038|||C1274038|CHV|||

ENT|ear nose throat|C0150934|||C0150934|CHV|||

ENT|ear nose throat surgery|C1274038|||C1274038|CHV;CSP|||

ENT|ear throat nose|C0150934|||C0150934|CHV|||

ENT|ear throat nose surgery|C1274038|||C1274038|CHV|||

ENT|ear, nose and throat (ENT)|C0150934|||C0150934|CHV|||

ENT|ear-nose-throat|C0150934|||1|0.3673|

ENT|ears nose throat|C0150934|||C0150934|CHV|||

ENT|ears, nose, throat||1|1.000|||1

ENT|embryonic nervous tissue|||1|0.1224|

ENT|entorhinal cortex|C0175196;C1289526|||1|0.1837|

ENT|enzootic nasal tumor|||1

ENT|equilibrative nucleoside transporter|||1|0.2653|

ENT|extranodular tissue|||||1  
ENT|nose ear throat|C0150934|||C0150934|CHV|||  
ENT|throat nose ear|C0150934|||C0150934|CHV|||  
EOMI|extraocular movements intact||1|1.000||||1  
EOMI|extraocular muscles intact|||||1  
EOM|EOM|C0241886|||C0241886|DXP|||  
EOM|EXTRAOCULAR|C0241886|||C0241886|DXP|||  
EOM|Extraocular|C0241886|||C0241886|NCI|||  
EOM|end of message|||||1  
EOM|eom|C0241886|||C0241886|CHV|||  
EOM|eoms|C0241886|||C0241886|CHV|||  
EOM|equal ocular movement|||||1  
EOM|error of measurement|||||1  
EOM|external otitis media|||||1  
EOM|extraocular|C0241886|||C0241886|CHV;NCI|||  
EOM|extraocular motion||1|1.000||||1  
EOM|extraocular  
muscle|C0028863;C1268995|||C0028863;C1268995|CHV;CSP;FMA;NCI;SNOMEDCT;UWDA|1|0.8  
803|1  
EOM|organic matter|||||1|0.1197|  
EPO|1-165-Erythropoietin (human clone lambdaHEPOFL13 protein moiety), glycoform  
alpha|||C0357126|MSH|||  
EPO|CLGI|C1705819|||C1705819|NCI|||  
EPO|COLLAGENASE INHIBITOR, HUMAN|C1367459|||C1367459|OMIM|||  
EPO|ECSF|C0014822|||C0014822|CSP|||  
EPO|ECSF (erythrocyte colony stimulating factor)|||C0014822|CSP|||  
EPO|EOSINOPHIL PEROXIDASE|C0059407;C1414438|||C1414438|OMIM|||  
EPO|EP|||C1366564|HUGO;OMIM|||  
EPO|EPA|||C1367459;C1705819|NCI;OMIM|||  
EPO|EPO|||C0014822;C0202001;C0357126;C1366564;C1367459;C1414438;C1705819|HUGO;N  
CI;OMIM;PDQ|||  
EPO|EPO - Erythropoietin|C0014822|||C0014822|SNOMEDCT|||  
EPO|EPO Gene|C1366564|||C1366564|NCI|||  
EPO|EPO assay|C0202001|||C0202001|SNOMEDCT|||  
EPO|EPO gene|C1366564|||C1366564|HUGO;MTH|||  
EPO|EPOETIN ALFA, RECOMBINANT|||C0357126|NDFRT;VANDF|||  
EPO|EPP|C0162568;C1414438|||C1414438|HUGO|||  
EPO|EPX|C1414438|||C1414438|HUGO;OMIM|||  
EPO|EPX gene|C1414438|||C1414438|HUGO;MTH|||  
EPO|EPX-PEN|C1414438|||C1414438|HUGO|||  
EPO|ERYTHROID POTENTIATING ACTIVITY|C1367459;C1522552|||C1367459|OMIM|||  
EPO|ERYTHROPOIETIN|C0014822;C0202001;C0357126;C0376541;C1755594|||C0014822;C0357  
126;C1366564|MTHSPL;NCI;OMIM|||  
EPO|ESA - Erythropoietin stimulating agent|C0014822|||C0014822|SNOMEDCT|||  
EPO|Epidemiology Program Office|||||1  
EPO|Epo|||C0014822|CSP|||  
EPO|Epoetin|C0014822|||C0014822|NCI|||  
EPO|Epoetin Alfa|C0357126|||C0357126|MTH;NCI;NDFRT;RXNORM;USPMG|||  
EPO|Epoetin Alfa [Chemical/Ingredient]|||C0357126|NDFRT|||  
EPO|Epoetin alfa|C0357126|||C0357126|SNOMEDCT|||  
EPO|Epoetin alfa (product)|C0357126|||C0357126|SNOMEDCT|||  
EPO|Epoetin alfa (substance)|||C0357126|SNOMEDCT|||  
EPO|Epoetin alfa product|C0357126|||C0357126|SNOMEDCT|||  
EPO|Erythrocyte Colony Stimulating Factor|C0014822;C0376541|||C0014822|NCI|||  
EPO|Erythropoietin|C0014822;C0202001;C0357126;C0376541;C1755594|||C0014822;C0202  
001|LCH;LNC;MSH;MTH;MTHSPL;NCI;NDFRT;SNOMEDCT|||  
EPO|Erythropoietin (substance)|||C0014822|SNOMEDCT|||

EPO|Erythropoietin Gene|C1366564|||C1366564|NCI|||  
EPO|Erythropoietin Measurement|C0202001|||C0202001|NCI|||  
EPO|Erythropoietin [Chemical/Ingredient]|||C0014822|NDFRT|||  
EPO|Erythropoietin level|C0202001;C0427434|||C0202001|SNOMEDCT|||  
EPO|Erythropoietin measurement|C0202001|||C0202001|MTH;SNOMEDCT|||  
EPO|Erythropoietin measurement (procedure)|||C0202001|SNOMEDCT|||  
EPO|Erythropoietin preparation|C0014822|||C0014822|SNOMEDCT|||  
EPO|Erythropoietin preparation (product)|||C0014822|SNOMEDCT|||  
EPO|Erythropoietin preparation (substance)|||C0014822|SNOMEDCT|||  
EPO|Erythropoietin product|||C0014822|SNOMEDCT|||  
EPO|Erythropoietin product (product)|||C0014822|SNOMEDCT|||  
EPO|Erythropoietin stimulating agent|C0014822|||C0014822|SNOMEDCT|||  
EPO|Evening Primrose Oil|C0700602|||1|0.02|  
EPO|HCI|||C1367459;C1705819|NCI;OMIM|||  
EPO|Hematopoietin|C0014822;C0202001;C0376541|||C0014822;C0202001|NCI|||  
EPO|TIMP|||C1367459;C1705819|NCI;OMIM|||  
EPO|TIMP metalloproteinase inhibitor 1|C1367459|||C1367459|HUGO|||  
EPO|TIMP1|C1367459;C2825911|||C1367459|HUGO;NCI;OMIM|||  
EPO|TIMP1 Gene|C1367459|||C1367459|NCI|||  
EPO|TIMP1 gene|C1367459|||C1367459|HUGO;MTH|||  
EPO|TIMP1 wt Allele|C1705819|||C1705819|MTH;NCI|||  
EPO|TISSUE INHIBITOR OF METALLOPROTEINASE  
1|C0145947;C1367459;C1522552;C2825911|||C1367459|OMIM|||  
EPO|Tissue Inhibitor of Metalloproteinase 1 (Erythroid Potentiating Activity,  
Collagenase Inhibitor) Gene|||C1367459|NCI|||  
EPO|Tissue Inhibitor of Metalloproteinase 1 (Erythroid Potentiating Activity,  
Collagenase Inhibitor) wt Allele|||C1705819|NCI|||  
EPO|eosinophil  
peroxidase|C0059407;C1414438|||C0059407;C1414438|HUGO;MSH;MTH;NDFRT;OMIM|1|0.073  
8|  
EPO|epo|||C0014822|CHV|||  
EPO|epoetin alfa|C0357126|||C0357126|CHV;MSH;NCI;PDQ|||1  
EPO|epoetin alfa recombinant|||C0357126|CHV|||  
EPO|epoprostenol|C0033567|||1|0.0026|  
EPO|epos|C0014822|||C0014822|CHV|||  
EPO|erythrocyte colony stimulating factor|C0014822;C0376541|||C0014822|CSP|||  
EPO|erythropoiesis|C0014819|||C0014819|AOD;CHV;CSP;GO;LCH;MSH;NCI;SNOMEDCT|||  
EPO|erythropoietin|C0014822;C0202001;C0357126;C0376541;C1755594|1|1.000|C0014822  
;C1366564|AOD;CHV;CSP;HUGO;NCI;PDQ|1|0.9036|1  
EPO|erythropoietin level|C0202001;C0427434|||C0202001|CHV|||  
EPO|erythropoietin level test|C0202001|||C0202001|CHV|||  
EPO|erythropoietin levels|C0202001;C0427434|||C0202001|CHV|||  
EPO|erythropoietin test|C0202001|||C0202001|CHV|||  
EPO|erythropoietins|C0014822|||C0014822|CHV|||  
EPO|evening primrose oil|C0700602|||1|  
EPO|exclusive provider organization|C1552477|||1|  
EPO|hematopoietin|C0014822;C0202001;C0376541|||C0014822|CSP|||  
EPO|recombinant 1-165 erythropoietin, glycoform alpha|C0357126|||C0357126|MSH|||  
EP|Atypical Pneumonia, Primary|C0032302;C0702135|||C0032302|MSH|||  
EP|Atypical Pneumonias, Primary|C0032302|||C0032302|MSH|||  
EP|CDDP-e TI|C0280609|||C0280609|NCI|||  
EP|CDDP/EPI|||C0280609|NCI;PDQ|||  
EP|CDDP/VP-16|||C0078414|NCI;PDQ|||  
EP|Cisplatin-e therapeutic implant|C0280609;C0677669|||C0280609|NCI|||  
EP|Cisplatin/Epirubicin|||C0280609|NCI|||  
EP|Cisplatin/Etoposide|C0078414|||C0078414|NCI|||  
EP|E-prostanoid|||1|0.0128|

EP|EP||||C0014508;C0032302;C0078414;C0115922;C0280609;C1366564;C1706321|HUGO;MSH  
;NCI;OMIM;PDQ;SNOMEDCT|||  
EP|EPIDEMIOLOGICAL|||C0014508|MSH|||  
EP|EPO|||C1366564|HUGO;NCI;OMIM|||  
EP|EPO Gene|C1366564||C1366564|NCI|||  
EP|EPO gene|C1366564||C1366564|HUGO;MTH|||  
EP|EPO wt Allele|C1706321||C1706321|MTH;NCI|||  
EP|ERYTHROPOIETIN|C0014822;C0202001;C0357126;C0376541;C1755594||C1366564|OMIM||  
|  
EP|Eaton agent pneumonia|C0032302||C0032302|CSP|||  
EP|Eaton's agent pneumonia|C0032302||C0032302|SNOMEDCT|||  
EP|Eaton's agent pneumonia|C0032302||C0032302|SNOMEDCT|||  
EP|Electrophysiology|C0013865;C1446476|||1|0.0164|  
EP|Endemic pneumonia|C0032302||C0032302|SNOMEDCT|||  
EP|Endocrine-paracrine|||1|0.0051|  
EP|Endogenous pyrogen|C0115922||C0115922|SNOMEDCT|||  
EP|Erythropoietin Gene|C1366564||C1366564|NCI|||  
EP|Erythropoietin wt Allele|C1706321||C1706321|NCI|||  
EP|Infection by PPLO|C0026936;C0032302||C0032302|SNOMEDCT|||  
EP|LEM|C0115922||C0115922|SNOMEDCT|||  
EP|Leukocyte endogenous mediator|C0115922||C0115922|SNOMEDCT|||  
EP|Leukocyte endogenous mediator|C0115922||C0115922|SNOMEDCT|||  
EP|MYCOPLASMA PNEUMONIA|C0032302||C0032302|QMR|||  
EP|Mycoplasma Pneumonia|C0032302||C0032302|COSTAR;MSH;NDFRT|||  
EP|Mycoplasma Pneumonias|C0026941;C0032302||C0032302|MSH|||  
EP|Mycoplasma pneumonia|C0032302||C0032302|MTH;SNOMEDCT|||  
EP|Mycoplasma pneumonia (disorder)|||C0032302|SNOMEDCT|||  
EP|Mycoplasma pneumoniae pneumonia|C0032302||C0032302|SNOMEDCT|||  
EP|Mycoplasmal pneumonia|C0032302||C0032302|SNOMEDCT|||  
EP|Mycoplasmal pneumonia (disorder)|||C0032302|SNOMEDCT|||  
EP|P-VP protocol|C0078414||C0078414|MSH|||  
EP|PAP due to Mycoplasma pneumoniae|C0032302||C0032302|SNOMEDCT|||  
EP|PE|||C0078414|NCI;PDQ|||  
EP|PGE(2) receptors|||1|0.0031|  
EP|PNEUMONIA, COLD AGGLUTININ POSITIVE|C0032302||C0032302|DXP|||  
EP|PNEUMONIA, EATON AGENT|C0032302||C0032302|DXP|||  
EP|PNEUMONIA, MYCOPLASMAL|C0032302||C0032302|DXP|||  
EP|PNEUMONIA, PRIMARY ATYPICAL|C0032302;C0702135||C0032302|DXP|||  
EP|PPLO|||C0032302|CSP|||  
EP|PVp|||C0078414|NCI;PDQ|||  
EP|Pneu mycplsm pneumoniae|||C0032302|ICD9CM|||  
EP|Pneumonia due to Eaton's agent|C0032302||C0032302|MTHICD9|||  
EP|Pneumonia due to Mycoplasma pneumoniae|C0032302||C0032302|ICD9CM;SNOMEDCT|||  
EP|Pneumonia due to Mycoplasma pneumoniae (disorder)|||C0032302|SNOMEDCT|||  
EP|Pneumonia due to PPLO|C0032302;C0553970||C0032302|SNOMEDCT|||  
EP|Pneumonia, Mycoplasma|C0032302||C0032302|MSH;NDFRT|||  
EP|Pneumonia, Mycoplasma [Disease/Finding]|||C0032302|NDFRT|||  
EP|Pneumonia, Primary Atypical|C0032302;C0702135||C0032302|MSH;NDFRT|||  
EP|Pneumonias, Mycoplasma|C0026941;C0032302||C0032302|MSH|||  
EP|Pneumonias, Primary Atypical|C0032302||C0032302|MSH|||  
EP|Primary Atypical Pneumonia|C0032302;C0702135||C0032302|MSH|||  
EP|Primary Atypical Pneumonias|C0032302||C0032302|MSH|||  
EP|Primary atypical pneumonia due to Mycoplasma  
pneumoniae|C0032302||C0032302|SNOMEDCT|||  
EP|VP-P chemotherapy protocol|C0078414||C0078414|CHV|||  
EP|VP-P protocol|C0078414||C0078414|MSH|||  
EP|VP-Plat|C0078414||C0078414|NCI;PDQ|||

EP|VPP|C0078414|||C0078414|NCI;PDQ|||  
EP|bovine encephalitogenic protein|||||1|0.0026|  
EP|cisplatin and etoposide|||||1|0.0031|  
EP|cisplatin and etoposide chemotherapy protocol|||C0078414|CHV|||  
EP|cisplatin etoposide|C0078414|||C0078414|CHV|||  
EP|cisplatin/epirubicin|||C0280609|PDQ|||  
EP|cisplatin/epirubicin protocol|C0280609|||C0280609|MTH|||  
EP|cisplatin/etoposide|C0078414|||C0078414|PDQ|||  
EP|cisplatin/etoposide protocol|C0078414|||C0078414|MTH|||  
EP|cold agglutinin positive pneumonia|C0032302|||C0032302|CSP|||  
EP|early phase|||||1|0.0031|  
EP|ectopic  
pregnancy|C0032987;C1315536|||C0032987|CCS;CHV;COSTAR;CSP;DXP;ICD9CM;ICPC;LNC;ME  
DLINEPLUS;MSH;MTH;NCI;NDFRT;QMR;SNOMEDCT|1|0.1068|1  
EP|edible portion|||||1|  
EP|egg production|||||1|0.0138|  
EP|electrophoresis|C0013855|||C0013855|AOD;CHV;CSP;HL7V3.0;LCH;LNC;MSH;NCI;SNOME  
DCT|||1  
EP|electrophoretic|||||1|  
EP|electrophysiologic|||||1|0.0296|1  
EP|electrophysiological|||||1|0.0143|  
EP|electrophysiology|C0013865;C1446476|1|0.996|||||1  
EP|electroprecipitin|||||1|  
EP|elopement precaution|||||1|  
EP|emergency physician|||||1|0.0184|  
EP|emergency procedure|C1298802|||||1|  
EP|encephalitogenic peptide|||||1|0.0031|  
EP|end point|C2349179;C2826544|||C2349179|MTH;NCI|||1  
EP|endocochlear potential|C0234738|||||1|0.1058|  
EP|endogenous pyrogen|C0115922|||C0115922|CSP;MSH;MTH;SNOMEDCT|1|0.0317|1  
EP|endoperoxide|||||1|  
EP|endorphin|C0014242;C0205752|||||1|  
EP|endoscopic papillotomy|C0085263|||||1|0.0066|  
EP|enteropeptidase|C0014366;C1418973|||C0014366;C1418973|CHV;HUGO;LNC;MSH;MTH;ND  
FRT;SNOMEDCT|||1  
EP|entopeduncular nucleus|C0228359|||||1|0.023|  
EP|environmental protection|C0242228|||||1|  
EP|enzootic pneumonia|||||1|0.0046|  
EP|enzyme product|||||1|  
EP|eosinophilic  
pneumonia|C0034068;C1527407|||C0034068;C1527407|CHV;COSTAR;CST;MSH;MTH;NCI;SNOME  
DCT|1|0.0066|1  
EP|ependymal|C0521405|||||1|  
EP|ephedrine|C0014479|||||1|0.0051|  
EP|epicardial|C0442016|||||1|  
EP|epidemiologic|C0014507;C0014508|||C0014508|MTH|||  
EP|epidemiology|C0014507;C0014508;C0699910|||C0014508|MSH|||  
EP|epirubicin|C0014582|||C0014582|CHV;MSH;MTH;NCI;NDFRT;RXNORM;SNOMEDCT;VANDF|||  
EP|epithelial|C0221908|||||1|  
EP|epithelium|C0014609|||||1|  
EP|epoxide|C0014630|||C0014630|CHV;CSP|||  
EP|equilibrium point|C0678589|||||1|0.0026|  
EP|erythrocyte protoporphyrin|||||1|0.023|1  
EP|erythrophagocytosis|C0302486|||C0302486|CHV;MTH;NCI;SNOMEDCT|||1  
EP|erythropoietic porphyria|C0162530|||C0162530|CHV;MSH;NCI;NDFRT;SNOMEDCT|||1

EP|erythropoietin|C0014822;C0202001;C0357126;C0376541;C1755594|||C0014822;C0202001;C0357126;C0376541;C1366564;C1755594|AOD;CHV;CSP;GO;HUGO;LCH;LNC;MSH;MTH;MTHSPL;NCI;NDFRT;OMIM;PDQ;SNOMEDCT|1|0.2156|

EP|escape protein|||||1|0.0046|

EP|esophageal pressure|C0232531|||C0232531|CHV;CSP;SNOMEDCT|||1

EP|esophoria|C0152216|||||1

EP|estrogen-progesterone|||||1|0.0056|

EP|etoposide and cisplatin|||||1|0.0123|

EP|etoposide phosphate|C0059874|||||1|0.0056|

EP|etoposide plus cisplatin|||||1|0.0051|

EP|evoked potential|C0015214|||C0015214|AOD;CHV;CSP;MSH;SNOMEDCT|||1

EP|evoked potentials|C0015214;C0561862|||||1|0.208|

EP|excretory phase|||||1

EP|extreme pressure|||||1

EP|leukocyte endogenous mediator|C0115922|||C0115922|MSH|||

EP|leukocyte pyrogen|C0115922|||C0115922|MSH|||

EP|mycoplasma pneumonia|C0032302|||C0032302|CHV|||

EP|mycoplasmal pneumonia|C0032302|||C0032302|CHV;CSP|||

EP|mycoplasmas pneumonia|C0032302|||C0032302|CHV|||

EP|pale ear|||||1|0.0051|

EP|period|C0439531;C1948053|||||1|0.0056|

EP|phosphoenzyme|||||1|0.0271|

EP|phosphoenzyme intermediate|||||1|0.0051|

EP|phosphorylated intermediate|||||1|0.0107|

EP|pneumonia mycoplasma|C0032302|||C0032302|CHV|||

EP|pplo|||C0032302|CHV|||

EP|pressure|C0033095;C0460139;C1306345|||||1|0.0118|

EP|pressure strain elastic modulus|||||1|0.0097|

EP|primary atypical pneumonia|C0032302;C0702135|||C0032302|CHV|||

EP|progesterone|C0033308;C2757070|||||1|0.0087|

EP|prostaglandin E|C0033559|||||1|0.0072|

EP|receptor|C0597357|||||1|0.0066|

EP|vivo electroporation|||||1|0.0046|

ERCP|CHOLANGIOPANCREATOGR ENDOSCOPIC RETROGRADE|||C0008310|MSH|||

ERCP|Cholangiopancreatographies, Endoscopic Retrograde|C0008310|||C0008310|MSH|||

ERCP|Cholangiopancreatography, Endoscopic Retrograde|C0008310|||C0008310|MSH|||

ERCP|Consent Type - ERCP|C1548852|||C1548852|MTH|||

ERCP|Diagnostic endoscopic retrograde examination of bile duct and pancreatic duct|||C0008310|SNOMEDCT|||

ERCP|Diagnostic endoscopic retrograde examination of bile duct and pancreatic duct (procedure)|||C0008310|SNOMEDCT|||

ERCP|Diagnostic endoscopic retrograde examination of bile duct and pancreatic duct NOS|||C0008310|SNOMEDCT|||

ERCP|Diagnostic endoscopic retrograde examination of bile duct and pancreatic duct NOS (procedure)|||C0008310|SNOMEDCT|||

ERCP|ENDOSCOPIC RETROGRADE CHOLANGIOPANCREATOGR|||C0008310|MSH|||

ERCP|ERCP|C0008310;C1548852|||C0008310;C1548852|HL7V2.5;LNC;MSH;MTHICD9;MTHMST;NCI;SNOMEDCT|||

ERCP|ERCP (endoscopic retrograde cholangiopancreatography)|C0008310|||C0008310|CSP|||

ERCP|ERCP - Endoscopic retrograde cholangiopancreatography|C0008310|||C0008310|SNOMEDCT|||

ERCP|ERCP, NOS|C0008310;C1548852|||C0008310|SNOMEDCT|||

ERCP|ERP|||C0008310|AOD|||

ERCP|Endosc retro cholangiopa|||C0008310|ICD9CM|||

ERCP|Endoscopic Retrograde Cholangiopancreatographies|C0008310|||C0008310|MSH|||

ERCP|Endoscopic Retrograde  
Cholangiopancreatography|C0008310|||C0008310|MSH;MTH;NCI|||  
ERCP|Endoscopic catheterisation of pancreatic duct and bile duct  
systems|||C0008310|SNOMEDCT|||  
ERCP|Endoscopic catheterization of pancreatic duct and bile duct  
systems|||C0008310|SNOMEDCT|||  
ERCP|Endoscopic catheterization of pancreatic duct and bile duct systems  
(procedure)|||C0008310|SNOMEDCT|||  
ERCP|Endoscopic retrograde cholangio-  
pancreatography|C0008310|||C0008310|MTHMST|1|0.0655|  
ERCP|Endoscopic retrograde  
cholangiopancreatography|C0008310|||C0008310|MTHICD9;SNOMEDCT|||  
ERCP|Endoscopic retrograde cholangiopancreatography  
(procedure)|||C0008310|SNOMEDCT|||  
ERCP|Endoscopic retrograde cholangiopancreatography (procedure)  
[Ambiguous]|||C0008310|SNOMEDCT|||  
ERCP|Endoscopic retrograde cholangiopancreatography -RETIRED-  
|||C0008310|SNOMEDCT|||  
ERCP|Endoscopic retrograde cholangiopancreatography  
[ERCP]|C0008310|||C0008310|ICD9CM|||  
ERCP|Endoscopic retrograde cholangiopancreatography,  
NOS|C0008310|||C0008310|SNOMEDCT|||  
ERCP|Endoscopic retrograde  
choledochopancreatography|C0008310|||C0008310|SNOMEDCT|||  
ERCP|RETROGRADE CHOLANGIOPANCREATOGR ENDOSCOPIC|||C0008310|MSH|||  
ERCP|Retrograde Cholangiopancreatographies,  
Endoscopic|C0008310|||C0008310|MSH|||  
ERCP|Retrograde Cholangiopancreatography, Endoscopic|C0008310|||C0008310|MSH|||  
ERCP|endoscopic retrograde cholangiography|C0193504|||1|0.0224|  
ERCP|endoscopic retrograde cholangiopancreatography|||1|0.0318|  
ERCP|endoscopic retrograde cholangiopancreatogram|||1|0.0087|1  
ERCP|endoscopic retrograde cholangiopancreatograph||1|1.000|||1  
ERCP|endoscopic retrograde cholangiopancreatographic|||1|0.0062|  
ERCP|endoscopic retrograde  
cholangiopancreatography|C0008310|||C0008310|AOD;CSP;MSH;MTH;MTHICD9;NCI;SNOMEDC  
T|1|0.856|1  
ERCP|endoscopic retrograde cholangiopancreatography  
(ERCP)|C0008310|||C0008310|CHV|||  
ERCP|endoscopic retrograde  
choledochopancreatography|C0008310|||C0008310|SNOMEDCT|||  
ERCP|endoscopic retrograde pancreatography|C0337380|||1|0.0094|  
ER|E2R - Estrogen receptor|C0034804|||C0034804|SNOMEDCT|||  
ER|E2R - Oestrogen receptor|C0034804|||C0034804|SNOMEDCT|||  
ER|EPIREGULIN|C0296263;C1366644|||C1366644|OMIM|||  
ER|ER|C0014688|||C0014239;C0014716;C0034804;C1366644;C1414461;C1521863;C1706235;  
C1706324;C1707968|GO;HUGO;NCI;OMIM;SNOMEDCT|||  
ER|ER-Alpha|C0665341;C1521863|||C1521863|NCI|||  
ER|ERA|C0681698;C1414461;C1706235|||C1706235|NCI|||  
ER|ERBIUM|C0014688|||C0014688|MTHSPL;NCI|||  
ER|EREG|C0296263;C1366644|||C1366644|HUGO;NCI;OMIM|||  
ER|EREG Gene|C1366644|||C1366644|NCI|||  
ER|EREG gene|C1366644|||C1366644|HUGO;MTH|||  
ER|EREG wt Allele|C1706324|||C1706324|MTH;NCI|||  
ER|ERI|C0014716|||C0014716|NCI|||  
ER|ERITREA|C0014716|||C0014716|NCI|||  
ER|ESR|||C1414461;C1706235|NCI;OMIM|||  
ER|ESR1|||C1414461;C1521863;C1706235|HUGO;NCI;OMIM|||

ER|ESR1 Gene|C1414461|||C1414461|NCI|||  
ER|ESR1 gene|C1414461|||C1414461|HUGO;MTH|||  
ER|ESR1 protein, human|C1521863|||C1521863|MSH;MTH|||  
ER|ESR1 wt Allele|C1706235|||C1706235|MTH;NCI|||  
ER|ESRA|C1414461;C1706235|||C1414461;C1706235|NCI;OMIM|||  
ER|ESTROGEN RECEPT|||C0034804|MSH|||  
ER|ESTROGEN RECEPTOR|C0034804;C1414461;C1521863|||C1414461|OMIM|||  
ER|ESTROGEN RECEPTOR 1|C1121711;C1414461;C1521863|||C1414461|OMIM|||  
ER|ESTROGEN RECEPTOR, ALPHA|C1414461|||C1414461|OMIM|||  
ER|Emergency Room|C0562508|||1|0.0299|  
ER|Endoplasmic Reticulum|C0014239|||C0014239|MSH;MTH;NCI|||  
ER|Endoplasmic reticulum|C0014239|||C0014239|FMA;LCH;SNOMEDCT;UWDA|||  
ER|Endoplasmic reticulum (body structure)|||C0014239|SNOMEDCT|||  
ER|Endoplasmic reticulum (cell structure)|||C0014239|SNOMEDCT|||  
ER|Endoplasmic reticulum, NOS|C0014239|||C0014239|SNOMEDCT|||  
ER|Epiregulin Gene|C1366644|||C1366644|NCI|||  
ER|Epiregulin wt Allele|C1706324|||C1706324|NCI|||  
ER|Er|C0014688|||C0014688|NCI|||  
ER|Era|C0681698;C1414461;C1706235|||C1414461|HUGO|||  
ER|Erbium|C0014688|||C0014688|LCH;MSH;MTH;NCI;NDFRT;SNOMEDCT|||  
ER|Erbium (substance)|||C0014688|SNOMEDCT|||  
ER|Erbium Metallicum|C0014688|||C0014688|NCI|||  
ER|Erbium [Chemical/Ingredient]|||C0014688|NDFRT|||  
ER|Ergastoplasm|C0014239;C0230779|||C0014239|MSH;SNOMEDCT|||  
ER|Eritrea|C0014716|||C0014716|AOD;MSH;MTH;NCI|||  
ER|Estradiol|C0014912|||1|0.0025|  
ER|Estradiol Receptor|C0034803;C0034804;C1521863|||C0034804;C1521863|NCI|||  
ER|Estrogen Receptor|C0034804;C1414461;C1521863|||C0034804;C1521863|NCI|||  
ER|Estrogen Receptor 1|C1121711;C1414461;C1521863|||C1521863|NCI|||  
ER|Estrogen Receptor 1 Gene|C1414461|||C1414461|NCI|||  
ER|Estrogen Receptor 1 wt Allele|C1706235|||C1706235|NCI|||  
ER|Estrogen Receptor Alpha|C0665341;C1521863|||C1521863|NCI|||  
ER|Estrogen Receptors|C0034804|||C0034804|MSH;MTH;NDFRT|||  
ER|Estrogen receptor|C0034804;C1414461;C1521863|||C0034804|LNC;SNOMEDCT|||  
ER|Estrogen receptor (substance)|||C0034804|SNOMEDCT|||  
ER|Estrogen receptor alpha|C0665341;C1521863|||1|0.008|  
ER|Estrogen receptor site|C0034804|||C0034804|SNOMEDCT|||  
ER|Extended Release|C1707968|||C1707968|NCI|||  
ER|Extended Release Dosage Form|C1707968|||C1707968|MTH;NCI|||  
ER|Extended Release Dose Form|C1707968|||C1707968|NCI|||  
ER|NR3A1|C1414461;C1706235|||C1414461;C1706235|HUGO;NCI|||  
ER|NR3A1 protein, human|C1521863|||C1521863|MSH|||  
ER|OR - Estrogen receptor|||C0034804|SNOMEDCT|||  
ER|OR - Oestrogen receptor|||C0034804|SNOMEDCT|||  
ER|Oestrogen receptor|C0034804;C1414461;C1521863|||C0034804|SNOMEDCT|||  
ER|Oestrogen receptor site|C0034804|||C0034804|SNOMEDCT|||  
ER|RECEPT ESTROGEN|||C0034804|MSH|||  
ER|Receptors of estrogens|||1|0.0001|  
ER|Receptors, Estrogen|C0034804|||C0034804|MSH;NDFRT|||  
ER|Receptors, Estrogen [Chemical/Ingredient]|||C0034804|NDFRT|||  
ER|Reticulum cytoplasmaticum|C0014239|||C0014239|FMA;UWDA|||  
ER|Reticulum endoplasmicum|C0014239|||C0014239|FMA;UWDA|||  
ER|Reticulum, Endoplasmic|C0014239|||C0014239|MSH|||  
ER|XR|C1707968;C1962945|||C1707968|NCI|||  
ER|early|C1279919|||1|0.0014|  
ER|early repolarization|C1997354|||1|  
ER|early response|||1|0.0008|

ER|early reticulocyte|||||||1  
ER|efficacy ratio|||||||1  
ER|ejection rate|||||||1  
ER|electrical resistance|C0162535;C1547024|||||1|0.0007|  
ER|electroresection|||C0441536|SNOMEDCT|||1  
ER|electrorheological|||||||1|0.0013|  
ER|emergency  
room|C0562508|1|0.896|C0562508;C1546435|AOD;CHV;HL7V2.5;HL7V3.0;NCI|||1  
ER|end range|||||||1  
ER|endoplasmic reticular|||||||1|0.001|  
ER|endoplasmic reticulum|C0014239|||C0014239|AOD;CHV;CSP;GO|1|0.4321|1  
ER|endoplasmic reticulum (ER)|C0014239|||C0014239|CHV|||  
ER|endoscopic resection|||||||1|0.0009|  
ER|endovascular repair|||||||1|0.0006|  
ER|energy restriction|||||||1|0.0032|  
ER|energy retention|||||||1|0.0009|  
ER|energy-restricted|||||||1|0.0009|  
ER|enhanced reactivation|||||||1|0.0011|1  
ER|enhancement ratio|||||||1|0.0053|1  
ER|environmental resistance|||||||1  
ER|epigastric region|C0230185|||C0230185|AOD;CHV;FMA;NCI;SNOMEDCT;UWDA|||1  
ER|epiregulin|C0296263;C1366644|||C1366644|HUGO|||  
ER|equine rhinopneumonia|||||||1  
ER|equivalent roentgen|||||||1  
ER|erbium|C0014688|||C0014688|AOD;CHV|||1  
ER|erythrocyte receptor|C0142009|||C0142009|MSH|||1  
ER|erythromycin|C0014806|||||||1|0.0022|  
ER|esophageal rupture|C0281839|||C0281839|CHV;COSTAR|||1  
ER|estradiol  
receptor|C0034803;C0034804;C1521863|||C0034803;C0034804;C1521863|MSH;NCI;NDFRT;S  
NOMEDCT|||1  
ER|estrogen|C0014939;C2936882|||||||1|0.0406|  
ER|estrogen  
receptor|C0034804;C1414461;C1521863|1|0.036|C0034804|CHV;CSP;NCI;PDQ|1|0.4205|1  
ER|estrogen receptor (ER)|C0034804;C1414461;C1521863|||C0034804|CHV|||  
ER|estrogen receptor 1|C1121711;C1414461;C1521863|||C1414461|HUGO|||  
ER|estrogen receptor 1, human|C1521863|||C1521863|MSH|||  
ER|estrogen receptor alpha, human|C1521863|||C1521863|MSH|||  
ER|estrogen receptor protein|C0059672|||||||1|0.0005|  
ER|estrogen receptor status|C1516974;C2919114|||||||1|0.0008|  
ER|estrogen receptors|C0034804|||C0034804|CHV|||  
ER|ethoxyresorufin|C0059734|||||||1|0.0009|  
ER|evoked response|||||||1|0.0023|1  
ER|expiratory reserve|C0802739;C0806093|||C0802739;C0806093|LNC;MTH|||1  
ER|extended external rotation|||||||1  
ER|extended release|C1707968|1|0.068|C1707968|NCI|||1  
ER|extended resistance|||||||1  
ER|extended-release|C1707968|||||||1|0.0152|  
ER|external reduction|||||||1  
ER|external resistance|||||||1  
ER|external rotation|C0231462|||C0231462|CHV;SNOMEDCT;UWDA|1|0.0014|1  
ER|extraction ratio|||||||1|0.0026|1  
ER|eye research|||||||1  
ER|oestrogen|C0014939;C2936882|||||||1|0.0101|  
ER|oestrogen receptor|C0034804;C1414461;C1521863|||C0034804|CHV|||  
ER|oestrogen receptor status|C1516974;C2919114|||||||1|0.0006|  
ER|oestrogen receptors|C0034804|||||||1|0.0089|

ER|rabbit erythrocytes|||||1|0.001|  
ER|reversal potential|||||1|0.0018|  
ES|(drug) ES||1|0.002|||||  
ES|ARSC|C1420490;C2699259|||C2699259|NCI|||  
ES|ARSC1|C2699259|||C2699259|NCI|||  
ES|ASC|C2985440|||C2699259|NCI|||  
ES|E-SINUS|C1522661|||C1522661|NCI|||  
ES|EC 3.1.6.2|||C2699259|NCI|||  
ES|EFTs|C0553580|||C0553580|NCI|||  
ES|EL SALVADOR|C0013754|||C0013754|NCI|||  
ES|ENDOSINUSIAL|C1522661|||C1522661|NCI|||  
ES|ES|||C0013754;C0037747;C0553580;C1522661;C1527243;C2699259|MSH;NCI;OMIM|||  
ES|ESP|C0015373;C0037747;C1421982;C2981686|||C0037747|NCI|||  
ES|ETHICS|C0015000;C1527243;C1552232|||C1527243|MSH|||  
ES|EWING SARCOMA|C0553580;C0684337|||C0553580|OMIM|||  
ES|EWING TUMOR|C0553580|||C0553580|DXP|||  
ES|Ego Strength|||||1|  
ES|El Salvador|C0013754|||C0013754|AOD;LCH;MSH;MTH;NCI;SNOMEDCT|||  
ES|El Salvador (geographic location)|||C0013754|SNOMEDCT|||  
ES|Embryonic stem|||||1|0.5118|  
ES|Endosinusial|C1522661|||C1522661|NCI|||  
ES|Endosinusial Route of Administration|C1522661|||C1522661|NCI|||  
ES|Endosinusial Route of Drug Administration|C1522661|||C1522661|MTH|||  
ES|Endotoxin shock|||||1|0.002|  
ES|Epilepsy Surgery|||||1|0.0017|  
ES|Es|||C1552150|HL7V3.0|||  
ES|Ewing Family of Tumors|||C0553580|NCI|||  
ES|Ewing Sarcoma|C0553580;C0684337|||C0553580|MSH;NCI|||  
ES|Ewing Sarcoma/Peripheral Primitive Neuroectodermal Tumor|||C0553580|NCI|||  
ES|Ewing Tumor|C0553580|||C0553580|MSH|||  
ES|Ewing sarcoma|C0553580;C0684337|||C0553580|OMIM;SNOMEDCT|||1|  
ES|Ewing sarcoma family of tumors|C0553580|||C0553580|NCI|||  
ES|Ewing's Family of Tumors|||C0553580|NCI|||  
ES|Ewing's Family of Tumours|||C0553580|NCI|||  
ES|Ewing's Sarcoma|C0553580;C0684337|||C0553580|COSTAR;MEDLINEPLUS;MSH;NCI|||  
ES|Ewing's Sarcoma/Peripheral Primitive Neuroectodermal Tumor|||C0553580|NCI|||  
ES|Ewing's Tumor|C0553580|||C0553580|MSH;NCI;NDFRT|||  
ES|Ewing's family of tumors|||C0553580|PDQ|||  
ES|Ewing's sarcoma|C0553580;C0684337|||C0553580|CSP;PDQ;SNOMEDCT|1|0.0491|  
ES|Ewing's sarcoma (morphologic abnormality)|||C0553580|SNOMEDCT|||  
ES|Ewing's tumor|C0553580|||C0553580|CSP;SNOMEDCT|||  
ES|Ewing's tumour|C0553580|||C0553580|SNOMEDCT|||  
ES|Ewings Tumor|C0553580|||C0553580|MSH|||  
ES|Ewings sarcoma|C0553580|||C0553580|MTH|||  
ES|Excretory-secretory|||||1|0.0747|  
ES|Expectation Score|||||1|  
ES|SARCOMA, EWING|C0553580;C0684337|||C0553580|DXP|||  
ES|SLV|C0013754;C1826764|||C0013754|NCI|||  
ES|SP|C0231290;C1420701;C1705920|||C0037747|NCI|||  
ES|SPAIN|C0037747|||C0037747|NCI|||  
ES|SSDD|C0079588;C2699259;C2717836|||C2699259|NCI|||  
ES|STS wt Allele|C2699259|||C2699259|MTH;NCI|||  
ES|SV|C0013754;C0560132;C1704677|||C0013754|NCI|||  
ES|Sarcoma, Ewing|C0553580;C0684337|||C0553580|MSH|||  
ES|Sarcoma, Ewing's|C0553580;C0684337|||C0553580|MEDLINEPLUS;MSH;NDFRT|||  
ES|Sarcoma, Ewing's [Disease/Finding]|||C0553580|NDFRT|||  
ES|Sarcoma, Ewings|C0553580|||C0553580|MSH|||

ES|Spain|C0037747|||C0037747|AOD;LCH;MSH;MTH;NCI;SNOMEDCT|||  
ES|Spain (geographic location)|||C0037747|SNOMEDCT|||  
ES|Steroid Sulfatase (Microsomal), Isozyme S wt Allele|||C2699259|NCI|||  
ES|Steryl-sulfatase|C0052456;C2699259|||C2699259|NCI|||  
ES|Supernumerary maxillary right central primary  
incisor|C1552150|||C1552150|MTH|||  
ES|Tumor, Ewing's|C0553580|||C0553580|MSH|||  
ES|Tumors of Ewing's Family|C0553580|||C0553580|NCI|||  
ES|Tumors of the Ewing's Family|C0553580|||C0553580|NCI|||  
ES|ectoplasmic specialization|||1|0.0037|  
ES|effect size|C0814843|||1|0.031|  
ES|ego strength|||1|0.0029|  
ES|einsteinium|C0013741|||1|  
ES|ejection sound|C0277911|||1|  
ES|el salvador|C0013754|||C0013754|CHV|||  
ES|elastic stockings|C0013761|||1|  
ES|elastic suspensor|||1|  
ES|electrical stimulation|C0013786|||1|0.0701|1  
ES|electrical stimulus|||1|  
ES|electrically stimulated|||1|0.0023|  
ES|electrophilic stress|||1|  
ES|electroshock|C0013870|||1|  
ES|electrospray|||1|0.0169|1  
ES|electrostimulation|||1|0.0069|  
ES|electrotherapy system|||1|  
ES|elopement status|||1|  
ES|embolic signals|||1|0.0034|  
ES|embryonic stem|||1|  
ES|embryonic stem cells|C0596508|||1|0.0043|  
ES|emergency service|C0013961|||1|  
ES|emission spectrometry|C0596509|||1|  
ES|emotional stress|C0086209|||1|0.0043|  
ES|end stage|C0205088|||1|  
ES|end systole|||1|  
ES|end-to-side|||1|  
ES|endolymphatic sac|C0014168;C1281159|||1|0.0342|  
ES|endometrial stromal|||1|0.0029|  
ES|endometritis-salpingitis|||1|  
ES|endoscopic sclerosis|||1|  
ES|endoscopic sclerotherapy|||1|0.0055|1  
ES|endoscopic sphincterotomy|C0085263|||1|0.0554|1  
ES|endosonography|C0376443;C0376444|||1|0.0052|  
ES|endostatin|C0534628;C1332771;C1705207|||1|0.0049|  
ES|endotoxic shock|C0036981|||1|0.0026|  
ES|engraftment syndrome|C0919746|||1|0.0026|  
ES|enhanced sensitivity||1|0.028|||  
ES|environmental stimulation|||1|  
ES|enzyme estrone sulfatase|||1|0.0057|  
ES|enzyme substrate|C0178623|||1|  
ES|enzyme-substrate|C0178623|||1|0.0046|  
ES|enzyme-substrate complex|C0596529|||1|0.0029|  
ES|epileptic seizures|C0014544|||1|0.0072|  
ES|epileptic syndrome|||1|  
ES|epithelial sarcoma|||1|  
ES|epithelioid sarcoma|C0205944|||1|0.0066|  
ES|erector spinae|C0224301;C1305743|||1|0.0109|  
ES|erythromycin stearate|C0059566|||1|0.0032|

ES|esophageal scintigraphy|||||||1  
ES|esophagus|C0014876;C0545823;C1278919|||||||1  
ES|esophoria|C0152216|||||||1  
ES|esterase|C0014894|||||1|0.0034|1  
ES|estrogens|C0014939|||||1|0.0026|  
ES|estrone sulfate|C0059668|||||1|0.004|  
ES|ethics|C0015000;C1527243;C1552232|||C1527243|MSH|||  
ES|ethics qualifier|C1527243|||C1527243|MTH|||  
ES|ewing sarcoma|C0553580;C0684337|||C0553580|CHV|||  
ES|ewing tumor|C0553580|||C0553580|CHV|||  
ES|ewing's sarcoma|C0553580;C0684337|||C0553580|CHV|||  
ES|ewing's tumor|C0553580|||C0553580|CHV|||  
ES|ewing's tumors|C0553580|||C0553580|CHV|||  
ES|ewings sarcoma|C0553580|||C0553580|CHV|||  
ES|ewings tumor|C0553580|||C0553580|CHV|||  
ES|ewings tumors|C0553580|||C0553580|CHV|||  
ES|ewings's sarcoma|C0553580|||C0553580|CHV|||  
ES|ex-smoker|C0337671|||||||1  
ES|exanthem subitum|C0015231|||||1|0.0049|  
ES|excretory and secretory|||||||1|0.0032|  
ES|excretory-secretory|||||||1  
ES|excretory-secretory products|||||||1|0.0089|  
ES|exfoliation syndrome|C0206368|||||||1|0.0026|1  
ES|experimental study|C0681814|||||||1  
ES|expert system|C0015324|||||1|0.0086|  
ES|expression site|||||||1|0.004|  
ES|extent score|||||||1|0.0043|  
ES|exterior surface|||||||1  
ES|external sensory|||||||1|0.0026|  
ES|extra strength|||1|0.938|||||1  
ES|extracapsular spread|||||||1  
ES|extracellular space|C0015352|||||1|0.002|  
ES|extrasystole|C0340464|||||||1  
ES|nitrobenzylthioinosine (NBMPR)-sensitive|||||||1|0.002|  
ES|sarcoma ewing|||C0553580|CHV|||  
ES|sarcoma ewing's|||C0553580|CHV|||  
ES|sarcoma ewings|C0553580|||C0553580|CHV|||  
ES|sarcoma, Ewing's|C0553580;C0684337|||C0553580|PDQ|||  
ES|sheep erythrocytes|||||||1|0.0029|  
ES|spain|C0037747|||C0037747|CHV|||  
ES|surface|C0205148|||||1|0.0029|  
ES|sweetened ethanol solution|||||||1|0.0017|  
ESR|EPR spectroscopy|C0013845|||C0013845|CSP|||  
ESR|ER|C0014688|||C1414461;C1706235|NCI;OMIM|||  
ESR|ERA|C0681698;C1414461;C1706235|||C1706235|NCI|||  
ESR|ERS|C0403549;C1704489|||C1704489|AOT|||  
ESR|ESR|||C0013845;C0086250;C1176468;C1414461;C1619634;C1704489;C1706235|AOT;CH  
V;CSP;MTH;NCI;OMIM|||  
ESR|ESR - Electron spin resonance|C0013845|||C0013845|SNOMEDCT|||  
ESR|ESR - Erythrocyte sedimentation  
rate|C0086250;C1176468|||C0086250;C1176468|SNOMEDCT|||  
ESR|ESR Spectroscopy|C0013845|||C0013845|NCI|||  
ESR|ESR1|||C1414461;C1706235|HUGO;NCI;OMIM|||  
ESR|ESR1 Gene|C1414461|||C1414461|NCI|||  
ESR|ESR1 gene|C1414461|||C1414461|HUGO;MTH|||  
ESR|ESR1 wt Allele|C1706235|||C1706235|MTH;NCI|||  
ESR|ESRA|C1414461;C1706235|||C1414461;C1706235|NCI;OMIM|||

ESR|ESTROGEN RECEPTOR|C0034804;C1414461;C1521863|||C1414461|OMIM|||  
ESR|ESTROGEN RECEPTOR 1|C1121711;C1414461;C1521863|||C1414461|OMIM|||  
ESR|ESTROGEN RECEPTOR, ALPHA|C1414461|||C1414461|OMIM|||  
ESR|Electron Paramagnetic Resonance|C0013845|||C0013845|MSH;NCI|||  
ESR|Electron Spin Resonance|C0013845|||C0013845|MSH;NCI|||  
ESR|Electron Spin Resonance Spectroscopy|C0013845|||C0013845|MSH;MTH;NCI|||  
ESR|Electron paramagnetic resonance spectroscopy|C0013845|||C0013845|LCH|||  
ESR|Electron spin resonance|C0013845|||C0013845|SNOMEDCT|||  
ESR|Electron spin resonance (procedure)||||C0013845|SNOMEDCT|||  
ESR|Electron spin resonance measurement|C0013845|||C0013845|SNOMEDCT|||  
ESR|Electron spin resonance measurement (procedure)||||C0013845|SNOMEDCT|||  
ESR|Electron spin resonance measurement, NOS|C0013845|||C0013845|SNOMEDCT|||  
ESR|Era|C0681698;C1414461;C1706235|||C1414461|HUGO|||  
ESR|Erythrocyte Sedimentation  
Rate|C0086250;C1176468;C1619634|||C0086250;C1176468;C1619634|MSH;MTH;NCI|||  
ESR|Erythrocyte Sedimentation Rate Measurement|C1176468|||C1176468|NCI|||  
ESR|Erythrocyte Sedimentation Rates|C0086250;C1619634|||C1619634|MSH|||  
ESR|Erythrocyte sedimentation  
rate|C0086250;C1176468;C1619634|||C0086250;C1619634|LNC;SNOMEDCT|||  
ESR|Erythrocyte sedimentation rate (observable entity)||||C0086250|SNOMEDCT|||  
ESR|Erythrocyte sedimentation rate - finding|C1619634|||C1619634|SNOMEDCT|||  
ESR|Erythrocyte sedimentation rate  
measurement|C1176468|||C1176468|MTH;SNOMEDCT|||  
ESR|Erythrocyte sedimentation rate measurement  
(procedure)||||C1176468|SNOMEDCT|||  
ESR|Estrogen Receptor 1 Gene|C1414461|||C1414461|NCI|||  
ESR|Estrogen Receptor 1 wt Allele|C1706235|||C1706235|NCI|||  
ESR|Extended Rotated Sidebent|C1704489|||C1704489|AOT;MTH|||  
ESR|Extended Sidebent Rotated|||C1704489|AOT|||  
ESR|Finding of erythrocyte sedimentation rate|C1619634|||C1619634|SNOMEDCT|||  
ESR|Finding of erythrocyte sedimentation rate (finding)||||C1619634|SNOMEDCT|||  
ESR|NR3A1|C1414461;C1706235|||C1414461;C1706235|HUGO;NCI|||  
ESR|Paramagnetic Resonance|C0013845|||C0013845|MSH|||  
ESR|Paramagnetic Resonance, Electron|C0013845|||C0013845|MSH|||  
ESR|Rate, Erythrocyte Sedimentation|C0086250;C1176468;C1619634|||C1619634|MSH|||  
ESR|Rates, Erythrocyte Sedimentation|C0086250;C1619634|||C1619634|MSH|||  
ESR|Resonance, Electron Paramagnetic|C0013845|||C0013845|MSH|||  
ESR|Resonance, Electron Spin|C0013845|||C0013845|MSH|||  
ESR|Resonance, Paramagnetic|C0013845|||C0013845|MSH|||  
ESR|Sedimentation Rate, Erythrocyte|C0086250;C1176468;C1619634|||C1619634|MSH|||  
ESR|Sedimentation Rates, Erythrocyte|C0086250;C1619634|||C1619634|MSH|||  
ESR|Spectroscopy, ESR|C0013845|||C0013845|NCI|||  
ESR|Spectroscopy, Electron Spin Resonance|C0013845|||C0013845|NCI|||  
ESR|electric skin resistance|||||||1  
ESR|electric skin response|||||||1  
ESR|electron paramagnetic resonance spectroscopy|C0013845|||C0013845|CSP|||  
ESR|electron spin resonance|C0013845|||C0013845|MSH;NCI;SNOMEDCT|1|0.5046|1  
ESR|electron spin resonance  
spectroscopy|C0013845|||C0013845|CSP;MSH;MTH;NCI|1|0.0188|  
ESR|erythrocyte rate sedimentation|C0086250|||C0086250|CHV|||  
ESR|erythrocyte sedimentation  
rate|C0086250;C1176468;C1619634|1|1.000|C0086250;C1114891;C1176468;C1619634|AOD;  
CHV;LNC;MSH;MTH;NCI;SNOMEDCT|1|0.4697|1  
ESR|erythrocyte sedimentation rate  
(ESR)|C0086250;C1176468;C1619634|||C0086250|CHV|||  
ESR|erythrocyte sedimentation rate result|C1619634|||C1619634|MTH|||  
ESR|erythrocyte sedimentation rates|C0086250;C1619634|||C0086250|CHV|||

ESR|erythrocytes rate sedimentation|C0086250|||C0086250|CHV|||  
ESR|esrs|C0086250|||C0086250|CHV|||  
ESR|estrogen  
receptor|C0034804;C1414461;C1521863|||C0034804;C1414461;C1521863|CHV;CSP;LNC;NCI  
;OMIM;PDQ;SNOMEDCT|1|0.007|  
ESR|estrogen receptor 1|C1121711;C1414461;C1521863|||C1414461|HUGO|||  
ESR|sedimentation rate|C0200704;C1176468|||C1176468|NCI|||  
ESWL|Disintegration of stones by extracorporeal induced  
shockwaves|||C0015359|MTHICD9|||  
ESWL|ESWL|C0015359|||C0015359|MSH;MTHICD9;SNOMEDCT|||  
ESWL|ESWL (Extracorporeal Shockwave Lithotripsy)|||C0015359|MSH|||  
ESWL|ESWLs (Extracorporeal Shockwave Lithotripsy)|||C0015359|MSH|||  
ESWL|Electrohydraulic Shockwave Lithotripsies|C0015359|||C0015359|MSH|||  
ESWL|Electrohydraulic Shockwave Lithotripsy|C0015359|||C0015359|MSH|||  
ESWL|Extracorporeal Shockwave Lithotripsies|C0015359|||C0015359|MSH|||  
ESWL|Extracorporeal Shockwave Lithotripsy|C0015359|||C0015359|MSH|||  
ESWL|Extracorporeal shockwave lithotripsy|C0015359|||C0015359|SNOMEDCT|||  
ESWL|Extracorporeal shockwave lithotripsy (procedure)|||C0015359|SNOMEDCT|||  
ESWL|Extracorporeal shockwave lithotripsy - action|||C0015359|SNOMEDCT|||  
ESWL|Extracorporeal shockwave lithotripsy - action (qualifier  
value)|||C0015359|SNOMEDCT|||  
ESWL|Extracorporeal shockwave lithotripsy [ESWL]|C0015359|||C0015359|ICD9CM|||  
ESWL|Extracorporeal shockwave lithotripsy, NOS|C0015359|||C0015359|SNOMEDCT|||  
ESWL|Lithotripsies, Electrohydraulic Shockwave|C0015359|||C0015359|MSH|||  
ESWL|Lithotripsies, Extracorporeal Shockwave|C0015359|||C0015359|MSH|||  
ESWL|Lithotripsy, Electrohydraulic Shockwave|C0015359|||C0015359|MSH|||  
ESWL|Lithotripsy, Extracorporeal Shockwave|C0015359|||C0015359|MSH|||  
ESWL|Shockwave Lithotripsies, Electrohydraulic|C0015359|||C0015359|MSH|||  
ESWL|Shockwave Lithotripsies, Extracorporeal|C0015359|||C0015359|MSH|||  
ESWL|Shockwave Lithotripsy, Electrohydraulic|C0015359|||C0015359|MSH|||  
ESWL|Shockwave Lithotripsy, Extracorporeal|C0015359|||C0015359|MSH|||  
ESWL|electrohydraulic shock wave lithotripsy|||1  
ESWL|eswl|C0015359|||C0015359|CHV|||  
ESWL|extracorporeal shock wave  
lithotripsy|C0015359|1|1.000|C0015359|CSP|1|0.871|1  
ESWL|extracorporeal shock wave lithotripsy (ESWL)|C0015359|||C0015359|CHV|||  
ESWL|extracorporeal shockwave  
lithotripsy|C0015359|||C0015359|MSH;SNOMEDCT|1|0.129|  
ETOH|ALCOHOL|C0001962;C0001975;C0202304|||C0001962|MTHSPL;NCI;NDFRT;VANDF|||  
ETOH|ALCOHOL, ETHYL|C0001962;C0885054|||C0001962|NDFRT;VANDF|||  
ETOH|Absolute Ethanol|C0001962;C1511761|||C0001962|NCI;PDQ|||  
ETOH|Absolute ethanol|C0001962;C1511761|||C0001962|NCI|||  
ETOH|Alcohol|C0001962;C0001975;C0202304|||C0001962|LNC;MEDLINEPLUS;MTHSPL;NCI;PD  
Q|||  
ETOH|Alcohol, Ethyl|C0001962;C0885054|||C0001962|MSH;NDFRT|||  
ETOH|Alcohol, Grain|C0001962|||C0001962|MSH|||  
ETOH|Drinking alcohol|C0001948;C0001962;C0589068|||C0001962|SNOMEDCT|||  
ETOH|ETHANOL|C0001962|||C0001962|MTHSPL;NCI|||  
ETOH|ETOH|C0001962|||C0001962|AOD;CSP;LNC|||  
ETOH|EtOH|C0001962|||C0001962|CHV|||  
ETOH|EtOH - Alcohol|C0001962|||C0001962|SNOMEDCT|||  
ETOH|EtOH - Ethanol|C0001962|||C0001962|SNOMEDCT|||  
ETOH|Ethanol|C0001962|||C0001962|LNC;MSH;MTH;MTHSPL;NCI;NDFRT;RXNORM;SNOMEDCT|||  
ETOH|Ethanol [Chemical/Ingredient]|||C0001962|NDFRT|||  
ETOH|Ethyl Alcohol|C0001962;C0885054|||C0001962|MSH;NCI|||  
ETOH|Ethyl alcohol|C0001962;C0885054|||C0001962|SNOMEDCT|||  
ETOH|Ethyl alcohol (product)|||C0001962|SNOMEDCT|||

ETOH|Ethyl alcohol (substance)|||C0001962|SNOMEDCT|||  
ETOH|Grain Alcohol|C0001962|||C0001962|MSH;NDFRT|||  
ETOH|Grain alcohol|C0001962|||C0001962|SNOMEDCT|||  
ETOH|Methylcarbinol|C0001962|||C0001962|NCI;PDQ|||  
ETOH|alcohol|C0001962;C0001975;C0202304|||C0001962|CHV;MTHSPL;NCI|||  
ETOH|alcohol ethyl|C0001962;C0885054|||C0001962|CHV|||  
ETOH|ethanol|C0001962|||C0001962;C0202304|AOD;CHV;CSP;LNC;MSH;MTH;MTHSPL;NCI;NDF  
RT;PDQ;RXNORM;SNOMEDCT|||  
ETOH|ethanols|C0001962|||C0001962|CHV|||  
ETOH|ethyl  
alcohol|C0001962;C0885054|1|1.000|C0001962;C0885054|AOD;CHV;CSP;MSH;NCI;PDQ;SNOM  
EDCT|1|1|1  
ETOH|grain alcohol|C0001962|||C0001962|AOD;CHV|||  
ET|CTP:ethanolamine-phosphate cytidyltransferase activity|||C1152393|GO|||  
ET|CYTIDYLYLTRANSFERASE, CTP-  
PHOSPHOETHANOLAMINE|C0311988;C1418398|||C1418398|OMIM|||  
ET|E-TRACHE|C1522653|||C1522653|NCI|||  
ET|ENDOTRACHEAL|C0599554;C1522653|||C1522653|NCI|||  
ET|ET|||C0015024;C0015127;C1152393;C1418398;C1522653|GO;HUGO;MSH;NCI;OMIM|||  
ET|ETH|C0015024|||C0015024|NCI|||  
ET|ETHANOLAMINE-PHOSPHATE  
CYTIDYLYLTRANSFERASE|C0311988;C1418398|||C1418398|OMIM|||  
ET|ETHIOPIA|C0015024|||C0015024|NCI|||  
ET|ETIOL|||C0015127|MSH|||  
ET|Ebbinghaus test|||1|||1  
ET|End-tidal|||1|0.0063|  
ET|Endotracheal Route of Administration|C1522653|||C1522653|NCI|||  
ET|Endotracheal Route of Drug Administration|C1522653|||C1522653|MTH|||  
ET|Escherichia coli endotoxin|C0059291|||1|0.0041|  
ET|Essential thrombocytosis|C0040028|||1|0.0088|  
ET|Essential tremor|C0270736|||1|0.0691|  
ET|Estrogen therapy|C0279494|||1|0.0055|  
ET|Ethiopia|C0015024|||C0015024|AOD;LCH;MSH;MTH;NCI;SNOMEDCT|||  
ET|Ethiopia (geographic location)|||C0015024|SNOMEDCT|||  
ET|Etiology aspects|C0015127|||C0015127|MTH|||  
ET|Ewing tumor|C0553580|||1|||1  
ET|Ewing tumors|C0553580|||1|0.0052|  
ET|Exchange transfusion|C0015236|||1|0.0091|  
ET|Federal Democratic Republic of Ethiopia|C0015024|||C0015024|MSH|||  
ET|Intratracheal|||C1522653|NCI;SNOMEDCT|||  
ET|Intratracheal Route of Administration|C1522653|||C1522653|NCI|||  
ET|Intratracheal route|||C1522653|SNOMEDCT|||  
ET|Intratracheal route (qualifier value)|||C1522653|SNOMEDCT|||  
ET|Intratracheal use|||C1522653|SNOMEDCT|||  
ET|IntratrachealRoute|C1522653|||C1522653|HL7V3.0|||  
ET|PCYT2|C1418398|||C1418398|HUGO;OMIM|||  
ET|PCYT2 gene|C1418398|||C1418398|HUGO;MTH|||  
ET|PHOSPHATE CYTIDYLYLTRANSFERASE 2, ETHANOLAMINE|C1418398|||C1418398|OMIM|||  
ET|aetiology|C0015127;C1314792;C1524003|||C0015127|CHV|||  
ET|causality|C0015127;C1314792|||C0015127|CHV;MSH|||  
ET|cause|C0015127;C1524003|||C0015127|CHV|||  
ET|caused by|||C0015127|CHV|||  
ET|causes|C0015127;C1314792|||C0015127|CHV;MSH|||  
ET|edema toxin|||1|||1  
ET|edge thickness|||1|||1  
ET|educational therapy|C0204583|||1|||1  
ET|effective temperature|||1|||1

ET|ejection time|C0812388;C2697908|||C0812388;C2697908|CHV;MTH;NCI|1|0.0237|1  
ET|elective termination||1|0.002|||  
ET|electron  
transfer|C0013846;C2244393|||C0013846;C2244393|AOD;CHV;CSP;GO;SNOMEDCT|1|0.0586|  
ET|electrophoretic type|||1|0.0061|  
ET|embryo transfer|C0013938|||C0013938|CHV;CSP;MSH;NCI;SNOMEDCT|||1  
ET|embryo transfers|C0013938|||1|0.0022|  
ET|end-tidal|||1  
ET|endometrial thickness|||1|0.003|1  
ET|endothelin|C0079284|||C0079284|AOD;CHV;CSP;LNC;MSH;MTH;NDFRT|1|0.4616|1  
ET|endothelin-1|C0079281;C1414260;C2825886|||1|0.0333|  
ET|endotoxin|C0014264|||C0014264|CHV;CSP;LNC;NCI;SNOMEDCT|||1  
ET|endotoxins|C0014264|||1|0.0025|  
ET|endotracheal|C0599554;C1522653|1|0.400|C0599554;C1522653|CHV;CSP;HL7V2.5;MTH;  
NCI|1|0.0184|1  
ET|endotracheal intubation|C0021932|||C0021932|CCS;CHV;MSH;SNOMEDCT|||  
ET|endotracheal tube|C0336630;C1546626|||C0336630|CHV;MTH;SNOMEDCT|1|0.0077|  
ET|endurance time|||1  
ET|endurance training|||1|0.003|  
ET|endurance-trained|||1|0.0099|  
ET|energy transfer|C0014274|||C0014274|AOD;CHV;LCH;MSH;SNOMEDCT|||  
ET|enterostomal therapy|C1555976|1|0.578|||1  
ET|enterotoxin|C0014372|||1  
ET|environmental temperature|C2983601|||C2983601|NCI|||  
ET|epidermolytic toxin|||1  
ET|epitestosterone|C0014594|||C0014594|CHV;LNC;MSH;NDFRT|1|0.0025|  
ET|epithelial tumor|C1368683|||1  
ET|ergotamine  
tartrate|C0086248|||C0086248|MSH;MTHSPL;NCI;NDFRT;RXNORM;SNOMEDCT;USPMG;VANDF|||  
ET|erythrotoxic toxin|C0059545|||C0059545|MSH|||  
ET|esotropia|C0014877|||C0014877|CHV;COSTAR;DXP;ICD9CM;MSH;MTH;NDFRT;OMIM;SNOMED  
CT|1|0.0039|1  
ET|esotropic|||1  
ET|essential thrombocythaemia|C0040028|||1|0.0388|  
ET|essential  
thrombocytopenia|C0040028|||C0040028|CHV;COSTAR;CSP;ICD9CM;MSH;NCI;PDQ;SNOMEDCT|1  
|0.0999|1  
ET|essential thrombocytosis|C0040028|||C0040028|CHV;MTHICD9;NCI;SNOMEDCT|||  
ET|essential  
tremor|C0270736|||C0270736|CHV;MEDLINEPLUS;MSH;MTH;NDFRT;OMIM;SNOMEDCT|||1  
ET|estrogen therapy|C0279494|||1  
ET|ethanol|C0001962|||1|0.0105|1  
ET|ethanolamine phosphate cytidyltransferase  
activity|C1152393|||C1152393|GO|||  
ET|ethanolamine-phosphate cytidyltransferase  
activity|C1152393|||C1152393|GO;MTH|||  
ET|ethiopia|C0015024|||C0015024|CHV|||  
ET|ethyl|||1  
ET|etiocholanolone test|||1  
ET|etiologies|C0015127|||C0015127|CHV|||  
ET|etiology|C0015127;C1314792;C1524003|||C0015127|CHV;MSH|||1  
ET|etoposide|C0015133|||C0015133|CHV;CSP;LCH;MSH;MTHSPL;NCI;NDFRT;PDQ;RXNORM;SNO  
MEDCT;USPMG;VANDF|1|0.0036|  
ET|eustachian  
tube|C0015183|||C0015183|CHV;CSP;FMA;LCH;MSH;MTH;NCI;SNOMEDCT;UWDA|1|0.0404|1  
ET|evapotranspiration|||1|0.0025|  
ET|evolutionary trace|||1|0.0028|

ET|exchange transfusion|C0015236|||C0015236|CHV;ICD9CM;MSH;SNOMEDCT|||1  
 ET|exercise test|C0015260|||C0015260|CHV;CSP;MSH;SNOMEDCT|1|0.0074|1  
 ET|exercise testing|C0015260|||C0015260|AOD;CHV|1|0.0083|  
 ET|exercise tolerance|C0162521;C2709256|||C0162521;C2709256|CHV;CSP;LNC;MSH;MTH;SNOMEDCT|1|0.003|  
 ET|exercise training|||1|0.014|  
 ET|exercise treadmill|||1  
 ET|exercise-trained|||1|0.0066|  
 ET|exfoliative toxin|||1|0.0072|  
 ET|expiration time|||1  
 ET|exploratory thoracoscopy|||1  
 ET|extracellular tachyzoite|||1  
 ET|phosphate cytidyltransferase 2, ethanolamine|C1418398|||C1418398|HUGO|||  
 ET|temperature|C0005903;C0039476|||1|0.0055|  
 ET|tests|C0022885;C0392366|||1|0.0025|  
 ET|treatment|C0039798;C0087111;C1522326;C1533734;C1705169;C3161471|||1|0.0028|  
 FANA|fluorescent antinuclear antibody|||1.000|||1|1|1|  
 FENA|Fractional excretion of sodium|C1318192;C1955481|||1|0.6349|  
 FENA|fractional excretion of Na|||1|0.0595|  
 FENA|fractional excretion of sodium|C1318192;C1955481|1|1.000|||1|1|  
 FENA|fractional sodium excretion|C0428601;C1318192|||1|0.3056|  
 FEN|Fenoterol|C0015840|||1|0.1739|  
 FEN|d,l-fenfluramine|||1|0.1449|  
 FEN|fenfluramine|C0015827|||1|0.6812|  
 FEN|fluids, electrolytes, nutrition|||1.000|||1|1|  
 FEV1|FEV1|C0802965;C0849974|||C0802965;C0849974|LNC;NCI|||  
 FEV1|FEV1%VC|C0849974|||C0849974|NCI|||  
 FEV1|Forced Expiratory Volume 1 Test|C0849974|||C0849974|NCI|||  
 FEV1|Forced Expiratory Volume in 1 Second|C0429706;C0849974|||C0849974|NCI|||  
 FEV1|PFT/FEV1|||C0849974|NCI|||  
 FEV1|Pulmonary Function Test/Forced Expiratory Volume 1|C0849974|||C0849974|MTH;NCI|||  
 FEV1|Volume^at 1.0 s post forced expiration:Vol:Pt:Respiratory system:Qn|||C0802965|LNC|||  
 FEV1|Volume^at 1.0 s post forced expiration:Volume:Point in time:Respiratory system:Quantitative|C0802965|||C0802965|LNC;MTH|||  
 FEV1|fev 1|C0429706;C0802965;C0849974|||C0849974|CHV|||  
 FEV1|forced expiratory volume at one second|||1|0.0186|  
 FEV1|forced expiratory volume during first second of expiration|||1|0.0012|  
 FEV1|forced expiratory volume in 1 sec|||1|0.2435|  
 FEV1|forced expiratory volume in 1 second|C0429706;C0849974|||1|0.6298|  
 FEV1|forced expiratory volume in 1s|||1|0.0373|  
 FEV1|forced expiratory volume in one second|||1.000|||1|1|  
 FEV1|lung function|C0035245|||1|0.0385|  
 FEV1|pulmonary function|C0231921;C1547996;C3160731|||1|0.0161|  
 FEV1|vital capacity|C0042834;C0430511|||1|0.0099|  
 FEV1|volume of air expelled in the first second of forced expiration|||1|0.005|  
 FFP|FFP|C0016709|||C0016709|NCI|||  
 FFP|FFP - Fresh frozen plasma|C0016709|||C0016709|SNOMEDCT|||  
 FFP|Federal Financial Participation|||1|0.0349|  
 FFP|Fresh Frozen Plasma|C0016709;C1547245|||C0016709|MSH;NCI|||  
 FFP|Fresh Frozen Plasmas|C0016709|||C0016709|MSH|||  
 FFP|Fresh frozen plasma|C0016709;C1547245|||C0016709|LNC;MTH;SNOMEDCT|||  
 FFP|Fresh frozen plasma (product)|||C0016709|SNOMEDCT|||  
 FFP|Fresh frozen plasma (substance)|||C0016709|SNOMEDCT|||

FFP|Fresh frozen plasma, human|||C0016709|SNOMEDCT|||  
FFP|Fresh frozen plasma, human (product)|||C0016709|SNOMEDCT|||  
FFP|Fresh frozen plasma, human (substance)|||C0016709|SNOMEDCT|||  
FFP|Frozen Plasma, Fresh|C0016709;C1547245|||C0016709|MSH|||  
FFP|Frozen Plasmas, Fresh|C0016709|||C0016709|MSH|||  
FFP|Plasma, Fresh Frozen|C0016709;C1547245|||C0016709|MSH|||  
FFP|Plasmas, Fresh Frozen|C0016709|||C0016709|MSH|||  
FFP|fast Fourier projection|||1  
FFP|flexible fluoropolymer|||1  
FFP|free of progression|||1  
FFP|freedom from progression|||1|0.1109|1  
FFP|fresh frozen  
plasma|C0016709;C1547245|1|1.000|C0016709;C1547245|CHV;HL7V2.5;LNC;MSH;MTH;NCI;S  
NOMEDCT|1|0.8542|1  
FISH|Actinistia|C1056439|||C1056439|NCBI|||  
FISH|Actinopterygii|C0998822|||C0998822|NCBI|||  
FISH|Cartilaginous fish|C0327606|||C0327606|SNOMEDCT|||  
FISH|Chondrichthyes|C0327606|||C0327606|AOD;CSP;NCBI;SNOMEDCT|||  
FISH|Class Chondrichthyes|C0327606|||C0327606|SNOMEDCT|||  
FISH|Class Chondrichthyes (organism)|||C0327606|SNOMEDCT|||  
FISH|Class chondrichthyes - cartilaginous fish|||C0327606|SNOMEDCT|||  
FISH|Class chondrichthyes - cartilaginous fish  
(organism)|||C0327606|SNOMEDCT|||  
FISH|Coelacanthimorpha|C1056439|||C1056439|NCBI|||  
FISH|Dipneusti|C0998806|||C0998806|NCBI|||  
FISH|Dipnoi|C0998806|||C0998806|NCBI|||  
FISH|FISH|C0016163;C2349190;C2700184|||C0162789;C1822711;C2349190;C2700184|HUGO;  
LNC;NCI|||  
FISH|FISH (fluorescent in situ hybridization)|||C0162789|CSP|||  
FISH|FISH - fluorescence in situ hybridisation|C0162789|||C0162789|SNOMEDCT|||  
FISH|FISH - fluorescence in situ hybridization|C0162789|||C0162789|SNOMEDCT|||  
FISH|FISH Technic|||C0162789|MSH|||  
FISH|FISH Technics|C0162789|||C0162789|MSH|||  
FISH|FISH Technique|C0162789|||C0162789|MSH|||  
FISH|FISH Techniques|C0162789|||C0162789|MSH|||  
FISH|Fish|C0016163;C2349190;C2700184|||C0016163;C2349190|LNC;NCI;SNOMEDCT|||  
FISH|Fish (NOS)|C0016163;C2349190;C2700184|||C0016163|NCI|||  
FISH|Fish (food)|C2349190|||C2349190|MTH|||  
FISH|Fish (organism)|||C0016163|SNOMEDCT|||  
FISH|Fish Flavor|C2700184|||C2700184|MTH;NCI|||  
FISH|Fish, NOS|C0016163;C2349190;C2700184|||C0016163|SNOMEDCT|||  
FISH|Fishes|C0016163|||C0016163|LCH;MSH;MTH|||  
FISH|Fluorescence In Situ Hybridization|C0162789|||C0162789|NCI|||  
FISH|Fluorescence in Situ Hybridization|C0162789|||C0162789|NCI|||  
FISH|Fluorescence in situ Hybridization|C0162789|||C0162789|NCI|||  
FISH|Fluorescence in situ hybridisation|C0162789|||C0162789|SNOMEDCT|||  
FISH|Fluorescence in situ hybridization|C0162789|||C0162789|SNOMEDCT|||  
FISH|Fluorescence in situ hybridization (procedure)|||C0162789|SNOMEDCT|||  
FISH|Fluorescent in Situ Hybridization|C0162789|||C0162789|MSH;MTH|||  
FISH|Hybridization in Situ, Fluorescence|||C0162789|MSH|||  
FISH|Hybridization in Situ, Fluorescent|||C0162789|MSH|||  
FISH|Hyperoartia|C1056205|||C1056205|NCBI|||  
FISH|Hyperotreti|C0949652|||C0949652|MSH;NCBI|||  
FISH|Hyperotretus|C0949652|||C0949652|MSH|||  
FISH|In Situ Hybridization, Fluorescence|||C0162789|MSH|||  
FISH|In Situ Hybridization, Fluorescent|||C0162789|MSH|||  
FISH|KIAA0418|C1822711|||C1822711|HUGO|||

FISH|Pisces|C0016163|||C0016163|AOD|||  
FISH|SH3 and PX domains 2A|||C1822711|HUGO|||  
FISH|SH3PXD2A|C1822711|||C1822711|HUGO|||  
FISH|SH3PXD2A gene|C1822711|||C1822711|HUGO;MTH|||  
FISH|Technic, FISH|||C0162789|MSH|||  
FISH|Technics, FISH|C0162789|||C0162789|MSH|||  
FISH|Technique, FISH|C0162789|||C0162789|MSH|||  
FISH|Techniques, FISH|C0162789|||C0162789|MSH|||  
FISH|cartilaginous fish|C0327606|||C0327606|AOD|||  
FISH|cartilaginous fishes|C0327606|||C0327606|CSP|||  
FISH|dipnoans|C0998806|||C0998806|NCBI|||  
FISH|fish|C0016163;C2349190;C2700184|||C0016163;C0327606;C0949652;C0998806;C0998822;C1056205;C1056439;C1696695|AOD;CHV;CSP;HL7V3.0;NCBI|||  
FISH|fish - EntityCode|C1696695|||C1696695|MTH|||  
FISH|fish <Actinopterygii>|C0998822|||C0998822|MTH;NCBI|||  
FISH|fish <Chondrichthyes>|C0327606|||C0327606|MTH;NCBI|||  
FISH|fish <Coelacanthimorpha>|||C1056439|NCBI|||  
FISH|fish <Dipnoi>|C0998806|||C0998806|MTH;NCBI|||  
FISH|fish <Hyperoartia>|C1056205|||C1056205|MTH;NCBI|||  
FISH|fish <Hyperotreti>|C0949652|||C0949652|MTH;NCBI|||  
FISH|fish technique|C0162789|||C0162789|CHV|||  
FISH|fishes|C0016163|||C0327606;C0949652;C0998806;C0998822;C1056205;C1056439|NCBI|||  
FISH|fishes <Actinopterygii>|||C0998822|NCBI|||  
FISH|fishes <Coelacanthimorpha>|||C1056439|NCBI|||  
FISH|fishes <Dipnoi>|||C0998806|NCBI|||  
FISH|fishes <Hyperoartia>|||C1056205|NCBI|||  
FISH|fishes <Hyperotreti>|||C0949652|NCBI|||  
FISH|fishes <chondrichthyan>|||C0327606|NCBI|||  
FISH|fishing techniques|C0162789|||C0162789|CHV|||  
FISH|five SH3 domains|C1822711|||C1822711|HUGO|||  
FISH|fluorescence hybridization situ|C0162789|||C0162789|CHV|||  
FISH|fluorescence in situ hybridisation|C0162789|||1|0.0731|  
FISH|fluorescence in situ hybridization|C0162789|||C0162789|NCI;SNOMEDCT|1|0.9034|  
FISH|fluorescence in situ hybridization technique|||1|0.0013|  
FISH|fluorescent hybridization situ|C0162789|||C0162789|CHV|||  
FISH|fluorescent in situ hybridisation|C0162789|||1|0.0203|  
FISH|fluorescent in situ hybridization|C0162789|1|0.898|C0162789|CSP;MSH;MTH|||1  
FISH|fluorescent in situ hybridization (FISH)|C0162789|||C0162789|PDQ|||  
FISH|lobe-finned fishes|||C1056439|NCBI|||  
FISH|lobe-finned fishes <coelacanthimorph>|C1056439|||C1056439|MTH;NCBI|||  
FISH|pisces|C0016163|||C0016163|CHV|||  
FISH|situ hybridization analysis|||1|0.0019|  
FSH|FOLLICLE STIMULATING HORMONE|C0733758|||C0733758|NDFRT;VANDF|||  
FSH|FOLLITROPIN|C0733758|||C0733758|MTHSPL;NCI;NDFRT;VANDF|||  
FSH|FSH|||C0202022;C0733758|AOD;CHV;CSP;FMA;NCI;SNOMEDCT;UWDA|||  
FSH|FSH (Follicle Stimulating Hormone)|C0733758|||C0733758|MSH;NDFRT|||  
FSH|FSH - Follicle stimulating hormone level|C0202022|||C0202022|SNOMEDCT|||  
FSH|FSH - Follicle-stimulating hormone|C0733758|||C0733758|SNOMEDCT|||  
FSH|FSH level|C0202022;C0428406|||C0202022|SNOMEDCT|||  
FSH|FSH measurement|C0202022|||C0202022|SNOMEDCT|||  
FSH|FSH preparation|C0733758|||C0733758|SNOMEDCT|||  
FSH|Fairview Southdale Hospital|||1|0.462|||  
FSH|Follicle Stimulating Hormone|C0733758|||C0202022;C0733758|MSH;MTH;MTHSPL;NCI;NDFRT;RXNORM|||  
FSH|Follicle Stimulating Hormone Measurement|C0202022|||C0202022|NCI|||

FSH|Follicle Stimulating Hormone [Chemical/Ingredient]|||C0733758|NDFRT|||  
FSH|Follicle stimulating hormone|C0733758||C0733758|SNOMEDCT|||  
FSH|Follicle stimulating hormone level|C0202022||C0202022|SNOMEDCT|||  
FSH|Follicle stimulating hormone measurement|C0202022||C0202022|MTH;SNOMEDCT|||  
FSH|Follicle stimulating hormone measurement (procedure)|||C0202022|SNOMEDCT|||  
FSH|Follicle stimulating hormone preparation|C0733758||C0733758|SNOMEDCT|||  
FSH|Follicle stimulating hormone preparation (product)|||C0733758|SNOMEDCT|||  
FSH|Follicle stimulating hormone preparation (substance)|||C0733758|SNOMEDCT|||  
FSH|Follicle-Stimulating Hormone|C0733758||C0733758|MSH;NCI;NDFRT|||  
FSH|Follicle-stimulating horm prod|C0733758||C0733758|SNOMEDCT|||  
FSH|Follicle-stimulating horm prod (product)|||C0733758|SNOMEDCT|||  
FSH|Follicle-stimulating horm prod (substance)|||C0733758|SNOMEDCT|||  
FSH|Follicle-stimulating hormone|C0733758||C0733758|MSH;NDFRT|||  
FSH|Follicle-stimulating hormone product|C0733758||C0733758|SNOMEDCT|||  
FSH|Follicle-stimulating hormone product (product)|||C0733758|SNOMEDCT|||  
FSH|Follicular stimulating hormone|C0733758||C0733758|FMA;UWDA|||  
FSH|Follitropin|C0733758||C0733758|FMA;LNC;MSH;MTHSPL;NCI;NDFRT;SNOMEDCT|||  
FSH|Follitropin preparation|C0733758||C0733758|SNOMEDCT|||  
FSH|Pituitary follicle stimulating hormone|C0733758||C0733758|SNOMEDCT|||  
FSH|Pituitary follicle stimulating hormone (substance)|||C0733758|SNOMEDCT|||  
FSH|facioscapulohumeral|||1  
FSH|facioscapulohumeral muscular dystrophy|C0238288|||1|0.1964|  
FSH|fascioscapulohumeral muscular dystrophy|C0238288|1|0.008|||1  
FSH|focal and segmental hyalinosis|||1  
FSH|follicle hormone stimulateing|||C0733758|CHV|||  
FSH|follicle hormone stimulating|C0733758||C0733758|CHV|||  
FSH|follicle hormones stimulating|||C0733758|CHV|||  
FSH|follicle stimulating fsh hormone|C0733758||C0733758|CHV|||  
FSH|follicle stimulating hormone|C0733758||C0202022;C0733758|CHV;CSP;MSH;MTH;MTHSPL;NCI;NDFRT;RXNORM;SNOMEDCT;VANDF|||  
FSH|follicle stimulating hormone (FSH) level test|||C0202022|CHV|||  
FSH|follicle-stimulating|||1|0.5893|  
FSH|follicle-stimulating hormone|C0733758|1|0.530|C0733758|AOD;CHV;NCI|||1  
FSH|follicle-stimulating hormones|||1|0.1429|  
FSH|follicular hormones stimulating|||C0733758|CHV|||  
FSH|follicular stimulating hormone|C0733758||C0733758|CHV|||  
FSH|follitropin|C0733758||C0733758|CHV;CSP;MTHSPL;NCI|||  
FSH|fshs|C0733758||C0733758|CHV|||  
FSH|patients with facioscapulohumeral|||1|0.0714|  
FUTS|fairview university transitional services||1|1.000|||1  
FVC|Capacities, Forced Vital|C0042834||C0042834|MSH|||  
FVC|Capacities, Vital|C0042834||C0042834|MSH|||  
FVC|Capacity, Forced Vital|C0042834;C0430511;C0802685||C0042834|MSH|||  
FVC|Capacity, Vital|C0042834;C0430511||C0042834|MSH|||  
FVC|Capacity.vital|C0042834||C0042834|LNC|||  
FVC|Capacity.vital.forced|||C0042834|LNC|||  
FVC|Capacity.vital.forced:Vol:Pt:Respiratory system:Qn|||C0802685|LNC|||  
FVC|Capacity.vital.forced:Volume:Point in time:Respiratory system:Quantitative|C0802685||C0802685|LNC;MTH|||  
FVC|FORCED VITAL CAPAC|||C0042834|MSH|||  
FVC|FVC|C0042834;C0802685||C0042834;C0802685|LNC;SNOMEDCT|||  
FVC|FVC - Forced vital capacity|C0042834||C0042834|SNOMEDCT|||  
FVC|Forced Vital Capacities|C0042834||C0042834|MSH|||  
FVC|Forced Vital Capacity|C0042834;C0430511;C0802685||C0042834|MSH|||  
FVC|Forced vital cap.|C0042834||C0042834|SNOMEDCT|||

FVC|Forced vital capacity|C0042834;C0430511;C0802685|||C0042834;C0802685|LNC;SNOMEDCT|||  
FVC|Forced vital capacity (observable entity)|||C0042834|SNOMEDCT|||  
FVC|Forearm vascular conductance|||||1|1|  
FVC|Lung vital capacity|C0042834|||C0042834|SNOMEDCT|||  
FVC|VC|||C0042834|SNOMEDCT|||  
FVC|VC - Vital capacity|C0042834|||C0042834|SNOMEDCT|||  
FVC|VITAL CAPAC|||C0042834|MSH|||  
FVC|Vital Capacities|C0042834|||C0042834|MSH|||  
FVC|Vital Capacities, Forced|C0042834|||C0042834|MSH|||  
FVC|Vital Capacity|C0042834;C0430511|||C0042834|MSH|||  
FVC|Vital Capacity, Forced|C0042834;C0430511;C0802685|||C0042834|MSH|||  
FVC|Vital capacity|C0042834;C0430511|||C0042834|MTH;SNOMEDCT|||  
FVC|Vital capacity (function)|||C0042834|SNOMEDCT|||  
FVC|Vital capacity (observable entity)|||C0042834|SNOMEDCT|||  
FVC|Vital capacity, function (observable entity)|||C0042834|SNOMEDCT|||  
FVC|Vital capacity.forced|||C0042834|LNC|||  
FVC|false vocal cord|C0149596|||||1|  
FVC|femoral vein catheter||1|0.006|||||  
FVC|filled voiding flow rate|||||1|  
FVC|forced vital capacity|C0042834;C0430511;C0802685|1|0.994|C0042834;C0430511;C0802685|AOD;CHV;LNC;MSH;SNOMEDCT|||1|  
FVC|fvc|C0042834;C0802685|||C0042834|CHV|||  
FVC|lung vital capacity|C0042834|||C0042834|CHV|||  
FVC|vc|||C0042834|CHV|||  
FVC|vital capacity|C0042834;C0430511|||C0042834|CHV|||  
FVC|vital lung capacity|C0042834|||C0042834|CHV|||  
G-CSF|CSF-G|C0079459|||C0079459|SNOMEDCT|||  
G-CSF|CSF3|C0079459;C1332793|||C0079459|NCI|||  
G-CSF|CSF3 wt Allele|C1705750|||C1705750|MTH;NCI|||  
G-CSF|Colony Stimulating Factor 3|C0079459;C1332793|||C0079459|NCI|||  
G-CSF|Colony Stimulating Factor 3 (Granulocyte) wt Allele|||C1705750|NCI|||  
G-CSF|Colony-Stimulating Factor (Granulocyte)|||C0079459|NCI|||  
G-CSF|Colony-stimulating factor, granulocyte|C0079459;C2825895|||C0079459|MSH;NDFRT|||  
G-CSF|Colony-stimulating factor, granulocytic|C0079459|||C0079459|SNOMEDCT|||  
G-CSF|Colony-stimulating factor, granulocytic (substance)|||C0079459|SNOMEDCT|||  
G-CSF|FILGRASTIM|C0210630;C1332793|||C0210630|MTHSPL;NCI;NDFRT;VANDF|||  
G-  
CSF|Filgrastim|C0210630;C1332793|||C0210630|MSH;MTH;NCI;NDFRT;RXNORM;SNOMEDCT|||  
G-CSF|Filgrastim (product)|||C0210630|SNOMEDCT|||  
G-CSF|Filgrastim (substance)|||C0210630|SNOMEDCT|||  
G-CSF|Filgrastim [Chemical/Ingredient]|||C0210630|NDFRT|||  
G-CSF|G CSF|C0079459|||C0079459|NCI;PDQ|||  
G-CSF|G-CSF|C0079459|||C0079459;C0210630;C1705750|MSH;NCI;NDFRT;PDQ;SNOMEDCT|||  
G-CSF|G-CSF - Recombinant human granulocyte-colony stimulating factor|C0210630|||C0210630|SNOMEDCT|||  
G-CSF|G-CSF Recombinant, Human Methionyl|||C0210630|MSH;NDFRT|||  
G-  
CSF|GCSF|C0079459;C1332793;C1705750;C2825895|||C0079459;C1705750|CSP;MSH;NCI|||  
G-CSF|GCSF (granulocyte colony stimulating factor)|||C0079459|CSP|||  
G-CSF|GRANULOCYTE COLONY A STIMULATING FACTOR|||C0079459|MSH|||  
G-CSF|Granulocyte Colony Stimulating Factor|C0079459;C2825895|||C0079459|NCI|||  
G-CSF|Granulocyte Colony-Stimulating Factor|C0079459;C2825895|||C0079459|MSH;MTH;NCI;NDFRT|||

G-CSF|Granulocyte Colony-Stimulating Factor  
[Chemical/Ingredient]|||C0079459|NDFRT|||  
G-CSF|Granulocyte colony stimulating  
factor|C0079459;C2825895|||C0079459|LNC;SNOMEDCT|||  
G-CSF|MGC45931|C1332793;C1705750|||C1705750|NCI|||  
G-CSF|Pluripoietin|C0079459;C1332793|||C0079459|NCI|||  
G-CSF|Recombinant Methionyl Human Granulocyte Colony Stimulating  
Factor|C0210630|||C0210630|NCI;PDQ|||  
G-CSF|Recombinant-Methionyl Human Granulocyte Colony Stimulating  
Factor|C0210630|||C0210630|PDQ|||  
G-CSF|Recombinant-Methionyl Human Granulocyte Colony-Stimulating  
Factor|C0210630|||C0210630|MSH;NDFRT|||  
G-CSF|csf g|C0079459|||C0079459|CHV|||  
G-CSF|filgrastim|C0210630;C1332793|||C0210630|CHV;NCI;PDQ|1|0.0112|  
G-CSF|filgrastrim|C0210630|||C0210630|CHV;CSP|||  
G-CSF|g csf|C0079459|||C0079459|CHV|||  
G-CSF|g-csf|C0079459|||C0079459|CHV|||  
G-CSF|gcsf|C0079459;C1332793;C1705750;C2825895|||C0079459|CHV|||  
G-CSF|granulocyte colony stimulating  
factor|C0079459;C2825895|||C0079459|CSP;PDQ|||  
G-CSF|granulocyte colony-stimulating  
factor|C0079459;C2825895|1|1.000|C0079459|NCI;PDQ|1|0.9888|1  
G-CSF|r-methuG-CSF|C0210630|||C0210630|MSH;NCI;NDFRT;PDQ|||  
G-CSF|r-methug-csf|C0210630|||C0210630|CHV|||  
G1|1, Gap Phase|C0079395|||C0079395|MSH|||  
G1|BASIC SALIVARY PROLINE-RICH PROTEIN, BstNI TYPE,  
3|C1418868|||C1418868|OMIM|||  
G1|Differentiated|C0007589;C0205615|||C0205615|SNOMEDCT|||  
G1|Differentiated, NOS|C0007589;C0205615|||C0205615|SNOMEDCT|||  
G1|First Gap Phase|C0079395|||C0079395|MSH|||  
G1|First Gap Phases|C0079395|||C0079395|MSH|||  
G1|First generation|||1|0.0461|  
G1|Fuhrman Grade 1|C1880858|||C1880858|MTH;NCI|||  
G1|Fuhrman Nuclear Grade 1|C1880858|||C1880858|NCI|||  
G1|G A 01 PHASE|||C0079395|MSH|||  
G1|G1|||C0079395;C0205615;C0475269;C0687695;C1418868;C1880858|NCI;OMIM;SNOMEDCT  
|||  
G1|G1 Phase|C0079395|||C0079395|MSH;MTH;NCI|||  
G1|G1 Phase Process|C0079395|||C0079395|NCI|||  
G1|G1 Phases|C0079395|||C0079395|MSH|||  
G1|G1 grade|C0475269|||C0475269|SNOMEDCT|||  
G1|G1 grade (finding)|||C0475269|SNOMEDCT|||  
G1|G1 period|C0079395|||C0079395|CSP|||  
G1|G1 phase|C0079395|||C0079395|CSP;GO|||  
G1|G1 stage|C0475269|||C0475269|SNOMEDCT|||  
G1|G1 stage (tumor staging)|||C0475269|SNOMEDCT|||  
G1|G1: well differentiated|||C0475269|SNOMEDCT|||  
G1|Gap 1 Phase|C0079395|||C0079395|NCI|||  
G1|Gap Phase 1|C0079395|||C0079395|MSH|||  
G1|Gap Phase, First|C0079395|||C0079395|MSH|||  
G1|Gap Phases, First|C0079395|||C0079395|MSH|||  
G1|Grade 1|C0547053;C0687695|||C0687695|NCI;SNOMEDCT|||  
G1|Grade 1 (qualifier value)|||C0687695|SNOMEDCT|||  
G1|Grade I|C0687695;C1883546|||C0205615;C0687695|NCI;SNOMEDCT|||  
G1|Grade one rank|C0687695|||C0687695|MTH|||  
G1|Group 1|C0441861|||1|0.3816|  
G1|PAROTID SALIVARY GLYCOPROTEIN|C1418868|||C1418868|OMIM|||

G1|PRB3|C1418868|||C1418868|HUGO;OMIM|||  
G1|PRB3 gene|C1418868|||C1418868|HUGO;MTH|||  
G1|PRG|C0033308;C1418868;C1418888|||C1418868|HUGO|||  
G1|PROLINE-RICH PROTEIN, BstNI SUBFAMILY, 3|C1418868|||C1418868|OMIM|||  
G1|Phase 1, Gap|C0079395|||C0079395|MSH|||  
G1|Phase, First Gap|C0079395|||C0079395|MSH|||  
G1|Phase, G1|C0079395|||C0079395|MSH|||  
G1|Phases, First Gap|C0079395|||C0079395|MSH|||  
G1|Phases, G1|C0079395|||C0079395|MSH|||  
G1|Tumor grade G1|C0475269|||C0475269|MTH;SNOMEDCT|||  
G1|Tumour grade G1|C0475269|||C0475269|SNOMEDCT|||  
G1|Well Differentiated|C0205615|||C0205615|MTH;NCI|||  
G1|Well differentiated|C0205615|||C0205615|SNOMEDCT|||  
G1|Well differentiated (grade) (qualifier value)|||C0205615|SNOMEDCT|||  
G1|Well differentiated (grade) [Ambiguous]|||C0205615|SNOMEDCT|||  
G1|Well differentiated (qualifier value)|||C0205615|SNOMEDCT|||  
G1|Well-differentiated|C0205615|||1|0.1053|  
G1|activated|C1879547|||1|0.0592|  
G1|control group|C0009932|||1|0.1053|  
G1|differentiate|C0205615|||C0205615|CHV|||  
G1|differentiated|C0007589;C0205615|||C0205615|CHV|||  
G1|differentiates|C0205615|||C0205615|CHV|||  
G1|differentiating|C0205615|||C0205615|CHV|||  
G1|first gap phase|C0079395|||1|0.0461|  
G1|first group|||1|0.0526|  
G1|first pregnancy|C0860096|1|0.998|||1|  
G1|galactose 1||1|0.002|||1|  
G1|gap1|||1|  
G1|grade 1|C0547053;C0687695|||C0687695|CHV|1|0.1447|  
G1|grade i|C0687695;C1883546|||C0687695|CHV|||  
G1|grid 1|||1|  
G1|patients|C0030705|||1|0.0592|  
G1|proline-rich protein BstNI subfamily 3|C1418868|||C1418868|HUGO|||  
G1|well differentiated|C0205615|||C0205615|CHV|||  
G1|well-differentiated|C0205615|||1|  
GAF|Activation Factor|||1|0.0644|  
GAF|FGF9|C0386595;C1333540|||C1333540|HUGO;NCI;OMIM|||  
GAF|FGF9 Gene|C1333540|||C1333540|NCI|||  
GAF|FGF9 gene|C1333540|||C1333540|HUGO;MTH|||  
GAF|FGF9 wt Allele|C1708018|||C1708018|MTH;NCI|||  
GAF|FIBROBLAST GROWTH FACTOR 9|C0386595;C1333540|||C1333540|OMIM|||  
GAF|Fibroblast Growth Factor 9 (Glia-Activating Factor) Gene|||C1333540|NCI|||  
GAF|Fibroblast Growth Factor 9 (Glia-Activating Factor) wt Allele|||C1708018|NCI|||  
GAF|GAF|C1333540;C1708018|||C1333540;C1708018|NCI;OMIM|||  
GAF|GLIA-ACTIVATING FACTOR|||C1333540|OMIM|||  
GAF|Global Assessment of Functioning|||1|0.0743|  
GAF|Global Assessment of Functioning|C0017644|||1|0.698|  
GAF|Global Assessment of Functioning Scale|||1|0.1634|  
GAF|HBMFG-9|C1708018|||C1708018|NCI|||  
GAF|fibroblast growth factor 9 (glia-activating factor)|||C1333540|HUGO|||  
GAF|geographic adjustment factors|||1|  
GAF|giant axon formation|||1|  
GAF|glia-activating factor|||1|  
GAF|global assessment of functioning|C0017644|1|1.000|||1|  
GC|2R,3S)-2-(3,4,5-trihydroxyphenyl)chroman-3,5,7-triol|||C0061012|NCI|||  
GC|CHROMATOGR GAS|||C0008555|MSH|||

GC|Chromatographies, Gas|C0008555|||C0008555|MSH|||  
GC|Chromatography, Gas|C0008555|||C0008555|MSH|||  
GC|DBP|||C1367452;C1704663|HUGO;NCI;OMIM|||  
GC|GAS CHROMATOGR|||C0008555|MSH|||  
GC|GC|||C0008555;C0061012;C1367452;C1704663|HUGO;LNC;NCI;OMIM|||  
GC|GC Gene|C1367452|||C1367452|NCI|||  
GC|GC gene|C1367452|||C1367452|HUGO;MTH|||  
GC|GC wt Allele|C1704663|||C1704663|MTH;NCI|||  
GC|GROUP-SPECIFIC COMPONENT|C0042872;C1367452|||C1367452|OMIM|||  
GC|Galocatechin|C0061012|||C0061012|NCI|||  
GC|Gas Chromatographies|C0008555|||C0008555|MSH|||  
GC|Gas Chromatography|C0008555|||C0008555|MSH;MTH;NCI|||  
GC|Gas chromatography (GC)|C0008555|||C0008555|HL7V3.0|||  
GC|Gas chromatography measurement|C0008555|||C0008555|SNOMEDCT|||  
GC|Gas chromatography measurement (procedure)|||C0008555|SNOMEDCT|||  
GC|Gas chromatography measurement, NOS|C0008555|||C0008555|SNOMEDCT|||  
GC|Gliomatosis cerebri|C0334576|||1|0.0072|  
GC|Glucocorticoid hormones|C0017710|||1|0.0026|  
GC|Golgi complex|C0018042|||1|0.0087|1  
GC|Group-Specific Component (Vitamin D Binding Protein) Gene|||C1367452|NCI|||  
GC|Group-Specific Component (Vitamin D Binding Protein) wt  
Allele|||C1704663|NCI|||  
GC|Group-specific component|C0042872;C1367452|||1|0.0523|  
GC|Neisseria gonorrhoeae|C0027573|||1|0.0108|  
GC|VDBG|C1367452;C1704663|||C1367452;C1704663|NCI;OMIM|||  
GC|VDBP|C1367452;C1704663|||C1367452;C1704663|HUGO;NCI;OMIM|||  
GC|VITAMIN D-BINDING ALPHA-GLOBULIN|C1367452|||C1367452|OMIM|||  
GC|VITAMIN D-BINDING PROTEIN|C0042872;C1367452|||C1367452|OMIM|||  
GC|anti-galactocerebroside|||1|0.0028|  
GC|chromatographis gas|||C0008555|CHV|||  
GC|chromatography gas|C0008555|||C0008555|CHV|||  
GC|conductance|||1|0.0028|  
GC|control group|C0009932|||1|0.0023|  
GC|epigallocatechin|C0061012;C2348459|||C0061012|CHV;MSH|||  
GC|epigallocatechins|C0061012|||C0061012|CHV|||  
GC|epigallocatechol|C0061012|||C0061012|MSH|||  
GC|galactocerebroside|C0060955|||C0060955|CHV;MSH;SNOMEDCT|1|0.0205|  
GC|galocatechin|C0061012|||C0061012|MSH|||  
GC|galocatechol|C0061012|||C0061012|MSH;MTH|||  
GC|ganglion cell|C0228071|||C0228071|CHV;CSP;FMA;NCI;SNOMEDCT|||1  
GC|gas chromatograph|||1|0.0141|  
GC|gas chromatographic|||1|0.0675|  
GC|gas chromatography|C0008555|1|0.010|C0008555|AOD;CHV;CSP|1|0.258|1  
GC|gastric  
cancer|C0024623;C0699791|||C0024623;C0699791|AOD;CHV;CSP;MEDLINEPLUS;MSH;MTHICD9  
;NCI;OMIM;PDQ;SNOMEDCT|1|0.0449|1  
GC|gastric  
carcinoma|C0699791|||C0699791|CHV;COSTAR;CST;MTHMST;NCI;QMR;SNOMEDCT|1|0.0172|1  
GC|gel chromatography|C0008559|||1|  
GC|gemcitabine and cisplatin|||1|0.0018|  
GC|general circulation|||1|  
GC|general closure|||1|  
GC|general condition|||1|  
GC|genetic counselor|C0587719|1|0.032|||1|  
GC|genomic control|||1|0.0023|  
GC|geriatric care|C1552319;C1552333|||1|  
GC|geriatric chair|C0179860|||1|

GC|germinal center|C0282491|||C0282491|CHV;FMA;MSH;NCI;UWDA|1|0.0946|1  
GC|germinal centre|C0282491|||1|0.0141|  
GC|giant cell|C0017526|||1|  
GC|gigacycle|||1|  
GC|gingival crevice|C0447436;C1280386|||1|  
GC|gingival curettage|C0038544|||1|  
GC|glassy carbon|||1|0.0138|  
GC|gliomatosis cerebri|C0334576|||C0334576|MSH;MTH;NCI;SNOMEDCT|||1|  
GC|glucocerebrosidase|C0017768;C1414998|||C0017768;C1414998|CSP;MSH;NDFRT;OMIM|  
|  
GC|glucocorticoid|C0017710|||C0017710|CHV;CSP;NCI;PDQ;SNOMEDCT|1|0.1523|1  
GC|glucocorticosteroids|||1|0.0041|  
GC|glucose challenge||1|0.004|||  
GC|glycocalicin|C0061621|||C0061621|MSH;MTH;OMIM|1|0.0059|  
GC|glycocholate|C0086356|||C0086356|CHV;MSH|||1|  
GC|glycocholic acid|C0017905|||1|0.0015|  
GC|glycoconjugate|C0017906|||C0017906|CHV;CSP;FMA|||  
GC|glycoprotein C|C0061666;C1423085|||1|0.0354|  
GC|goblet cell|C0506994|||C0506994|CHV;CSP;FMA;MSH;NCI;UWDA|||1|  
GC|goniocurettage|||1|  
GC|gonococcal|C0018081|||1|0.0028|  
GC|gonococci|||1|0.0036|  
GC|gonococcus|C0027571;C0027573|1|0.954|||1|  
GC|gonorrhoea|C0018081|||1|0.0026|1  
GC|gonorrhoea culture|||1|  
GC|good condition|||1|  
GC|graham cracker|||1|  
GC|granular cast|||1|  
GC|granular component|C1167080|||C1167080|GO|||  
GC|granular cyst|||1|  
GC|granule cell|C0596630|||C0596630|CSP|1|0.0036|1  
GC|granulocyte cytotoxic|||1|  
GC|granulomatous colitis|C0156147|||1|  
GC|granulosa cell|C0018207|||C0018207|CHV;CSP;FMA;MSH;MTH;NCI|||1|  
GC|granulosa cells|C0018207|||1|0.0539|  
GC|group-specific component|C0042872;C1367452|||C0042872;C1367452|NCI;OMIM|||1|  
GC|group-specific component (vitamin D binding protein)|||C1367452|HUGO|||  
GC|growth cartilage|||1|0.0023|  
GC|growth cone|C0596632|||C0596632|CSP;GO;MSH|||  
GC|guanine cytosine|||1|  
GC|guanine plus cytosine|||1|0.0015|  
GC|guanine-cytosine|||1|0.0077|  
GC|guanylate  
cyclase|C0018358|||C0018358|CHV;CSP;MSH;MTH;NCI;NDFRT;SNOMEDCT|1|0.0367|  
GC|guanylcyclase|||1|  
GC|guanylyl cyclase|C0018358|||C0018358|CHV;CSP;MSH;NDFRT;SNOMEDCT|1|0.0251|  
GC|gustatory cortex|C0682660|||1|0.0026|  
GC|hDBP|C1367452|||C1367452|HUGO|||  
GC|human glucocerebrosidase|||1|0.0044|  
GC|pituitary tumor|C0032019|||1|0.0026|  
GC|rat pituitary|C1882827|||1|0.0015|  
GC|sodium glycocholate|||1|0.0021|  
GC|vapor phase chromatography|C0008555|||C0008555|CSP|||  
GC|vitamin D binding protein|C0042872;C1367452|||1|0.0095|  
GCT|Carcinoid Neoplasm of Digestive System|C0220620|||C0220620|NCI|||  
GCT|Carcinoid Neoplasm of GI System|C0220620|||C0220620|NCI|||  
GCT|Carcinoid Neoplasm of Gastrointestinal System|C0220620|||C0220620|NCI|||

GCT|Carcinoid Neoplasm of the Digestive System|C0220620|||C0220620|NCI|||  
GCT|Carcinoid Neoplasm of the GI System|C0220620|||C0220620|NCI|||  
GCT|Carcinoid Neoplasm of the Gastrointestinal System|C0220620|||C0220620|NCI|||  
GCT|Carcinoid Tumor of Digestive System|C0220620|||C0220620|NCI|||  
GCT|Carcinoid Tumor of GI System|C0220620|||C0220620|NCI|||  
GCT|Carcinoid Tumor of Gastrointestinal System|C0220620|||C0220620|NCI|||  
GCT|Carcinoid Tumor of the Digestive System|C0220620|||C0220620|NCI|||  
GCT|Carcinoid Tumor of the GI System|C0220620|||C0220620|NCI|||  
GCT|Carcinoid Tumor of the Gastrointestinal System|C0220620|||C0220620|NCI|||  
GCT|Carcinoid tumor of gastrointestinal tract|C0220620|||C0220620|SNOMEDCT|||  
GCT|Carcinoid tumor of gastrointestinal tract (disorder)|||C0220620|SNOMEDCT|||  
GCT|Carcinoid tumour of gastrointestinal tract|C0220620|||C0220620|SNOMEDCT|||  
GCT|Common Neuroendocrine Tumor|C0220620|||C0220620|NCI|||  
GCT|Digestive Carcinoid Neoplasm|C0220620|||C0220620|NCI|||  
GCT|Digestive Carcinoid Tumor|C0220620|||C0220620|NCI|||  
GCT|Digestive System Carcinoid Neoplasm|C0220620|||C0220620|NCI|||  
GCT|Digestive System Carcinoid Tumor|C0220620|||C0220620|NCI|||  
GCT|GCT|C0205851;C0220620;C1419183|||C0205851;C0220620;C1419183|HUGO;NCI;OMIM;PDQ|||  
GCT|GERM CELL NEOPL|||C0205851|MSH|||  
GCT|GERM CELL TUMOR|C0205851|||C0205851|OMIM|||  
GCT|GI Carcinoid Neoplasm|C0220620|||C0220620|NCI|||  
GCT|GI Carcinoid Tumor|C0220620|||C0220620|NCI|||  
GCT|GI carcinoid tumor|C0220620|||C0220620|PDQ|||  
GCT|GLUTAMINYL CYCLASE|C0245636;C1419183|||C1419183|OMIM|||  
GCT|GLUTAMINYL-PEPTIDE CYCLOTRANSFERASE|C0245636;C1419183|||C1419183|OMIM|||  
GCT|Gastrointestinal Carcinoid Neoplasm|C0220620|||C0220620|NCI|||  
GCT|Gastrointestinal Carcinoid Tumor|C0220620|||C0220620|MTH;NCI|||  
GCT|Gastrointestinal System Carcinoid Neoplasm|C0220620|||C0220620|NCI|||  
GCT|Gastrointestinal System Carcinoid Tumor|C0220620|||C0220620|NCI|||  
GCT|Gastrointestinal carcinoid tumor|C0220620|||C0220620|PDQ|||  
GCT|General Clerical Test|C0451181|||1  
GCT|Germ Cell Neoplasm|C0205851|||C0205851|NCI|||  
GCT|Germ Cell Neoplasms|C0205851|||C0205851|MSH;NCI|||  
GCT|Germ Cell Tumor|C0205851|||C0205851|MSH;NCI|||  
GCT|Germ Cell Tumors|C0205851|||C0205851|MSH|||  
GCT|Germ cell neoplasm|C0205851|||C0205851|SNOMEDCT|||  
GCT|Germ cell neoplasm (morphologic abnormality)|||C0205851|SNOMEDCT|||  
GCT|Germ cell tumor|C0205851|||C0205851|MTH;SNOMEDCT|||  
GCT|Germ cell tumor (disorder)|||C0205851|SNOMEDCT|||  
GCT|Germ cell tumor, NOS|C0205851|||C0205851|SNOMEDCT|||  
GCT|Germ cell tumour|C0205851|||C0205851|SNOMEDCT|||  
GCT|Germ cell tumour (disorder)|||C0205851|SNOMEDCT|||  
GCT|NEOPL GERM CELL|||C0205851|MSH|||  
GCT|Neoplasm of Germ Cell|C0205851|||C0205851|NCI|||  
GCT|Neoplasm of the Germ Cell|C0205851|||C0205851|NCI|||  
GCT|Neoplasms, Germ Cell|C0205851|||C0205851|MSH|||  
GCT|QC|C0034378;C1419183|||C1419183|HUGO;OMIM|||  
GCT|QPCT|C1419183|||C1419183|HUGO;OMIM|||  
GCT|QPCT gene|C1419183|||C1419183|HUGO;MTH|||  
GCT|Tumor of Germ Cell|C0205851|||C0205851|NCI|||  
GCT|Tumor of the Germ Cell|C0205851|||C0205851|NCI|||  
GCT|Tumor, Germ Cell|C0205851|||C0205851|MSH|||  
GCT|Tumors, Germ Cell|C0205851|||C0205851|MSH|||  
GCT|[M]Germ cell neoplasm NOS|||C0205851|SNOMEDCT|||  
GCT|[M]Germ cell neoplasm NOS (morphologic abnormality)|||C0205851|SNOMEDCT|||  
GCT|[M]Germ cell neoplasms|||C0205851|SNOMEDCT|||

GCT|[M]Germ cell neoplasms (morphologic abnormality)||||C0205851|SNOMEDCT|||  
GCT|carcinoid gastrointestinal tumors|C0220620|||C0220620|CHV|||  
GCT|carcinoid tumor, gastrointestinal|C0220620|||C0220620|PDQ|||  
GCT|cell germ tumours|C0205851|||C0205851|CHV|||  
GCT|cell tumor|||||1|0.4693|  
GCT|cells germ tumors|C0205851|||C0205851|CHV|||  
GCT|gastrointestinal carcinoid tumor|C0220620|||C0220620|CHV;NCI;PDQ|||  
GCT|general care and treatment|||||1|  
GCT|germ cell neoplasm|C0205851|||C0205851|CSP|||  
GCT|germ cell neoplasms|C0205851|||C0205851|CHV|||  
GCT|germ cell tumor|C0205851|||C0205851|CHV;NCI|||  
GCT|germ cell tumors|C0205851|||C0205851|CHV|1|0.2235|  
GCT|germ cell tumour|C0205851|||C0205851|CHV|||  
GCT|germ-cell tumor|C0205851|||||1|  
GCT|giant cell tumor of bone|C0206638|||||1|0.0987|  
GCT|giant-cell thyroiditis|C0040149|||||1|  
GCT|giant-cell transformation|C1856459|||||1|  
GCT|giant-cell tumor|C0017525|||||1|  
GCT|glucose challenge test|C0017741|1|0.998|||1|0.0931|  
GCT|glutaminyl cyclase|C0245636;C1419183|||C1419183|HUGO|||  
GCT|glutaminyl-peptide cyclotransferase|C0245636;C1419183|||C1419183|HUGO|||  
GCT|granular cell tumor|C0085167|||||1|  
GCT|granular convoluted tubule|||||1|0.1155|  
GCT|granulosa cell tumor|C0018206|||||1|  
GERD|Acid Reflux|C0017168|||C0017168|MEDLINEPLUS|||  
GERD|Acid Reflux, Gastric|C0017168|||C0017168|MSH|||  
GERD|Acid reflux|C0017168|||C0017168|SNOMEDCT|||  
GERD|CARDIOESOPHAGEAL RELAXATION, GASTROESOPHAGEAL  
REFLUX|C0017168|||C0017168|DXP|||  
GERD|ESOPHAGEAL REFLUX|C0017168;C0559234|||C0017168|COSTAR;DXP|||  
GERD|Esophageal Reflux|C0017168;C0559234|||C0017168|MSH;NDFRT|||  
GERD|Esophageal reflux|C0017168;C0559234|||C0017168|ICD9CM;SNOMEDCT|||  
GERD|GASTROESOPHAGEAL REFLUX|C0017168|||C0017168|CST;DXP;OMIM|||  
GERD|GASTROESOPHAGEAL REFLUX DIS|||C0017168|MSH|||  
GERD|GASTROESOPHAGEAL REFLUX DISEASE|C0017168|||C0017168|OMIM|||  
GERD|GASTROESOPHAGEAL REFLUX, PEDIATRIC|C0017168|||C0017168|OMIM|||  
GERD|GE REFLUX|C0017168|||C0017168|DXP|||  
GERD|GER|C0017168;C0230779|||C0017168|OMIM|||  
GERD|GERD|C0017168|||C0017168|MEDLINEPLUS;MSH;NCI;NDFRT|||  
GERD|GERD - Gastro-esophageal reflux disease|C0017168|||C0017168|SNOMEDCT|||  
GERD|GERD1|C0017168|||C0017168|OMIM|||  
GERD|GOR - Gastro-esophageal reflux|C0017168|||C0017168|SNOMEDCT|||  
GERD|GOR - Gastro-oesophageal reflux|C0017168|||C0017168|SNOMEDCT|||  
GERD|GORD - Gastro-esophageal reflux disease|C0017168|||C0017168|SNOMEDCT|||  
GERD|GORD - Gastro-oesophageal reflux disease|C0017168|||C0017168|SNOMEDCT|||  
GERD|Gastresophageal reflux|C0017168|||C0017168|SNOMEDCT|||  
GERD|Gastresophageal reflux disease|C0017168|||C0017168|SNOMEDCT|||  
GERD|Gastric Acid Reflux|C0017168|||C0017168|MSH|||  
GERD|Gastric Acid Reflux Disease|C0017168|||C0017168|MSH|||  
GERD|Gastro Esophageal Reflux|C0017168|||C0017168|MSH|||  
GERD|Gastro oesophageal Reflux|C0017168|||C0017168|MSH|||  
GERD|Gastro-Esophageal Reflux|C0017168|||C0017168|MSH;NDFRT|||  
GERD|Gastro-esophageal reflux|C0017168|||C0017168|SNOMEDCT|||  
GERD|Gastro-esophageal reflux disease|C0017168|||C0017168|MTHMST;SNOMEDCT|||  
GERD|Gastro-oesophageal Reflux|C0017168|||C0017168|MSH;NDFRT|||  
GERD|Gastro-oesophageal reflux|C0017168|||C0017168|SNOMEDCT|||  
GERD|Gastro-oesophageal reflux disease|C0017168|||C0017168|SNOMEDCT|||

GERD|Gastroesophageal Reflux|C0017168|||C0017168|MEDLINEPLUS;MSH;NCI;NDFRT|||  
GERD|Gastroesophageal Reflux Disease|C0017168|||C0017168|MSH;NCI;NDFRT|||  
GERD|Gastroesophageal Reflux [Disease/Finding]|||C0017168|NDFRT|||  
GERD|Gastroesophageal reflux|C0017168|||C0017168|LCH;MTHICD9;OMIM;SNOMEDCT|||  
GERD|Gastroesophageal reflux (finding)|||C0017168|SNOMEDCT|||  
GERD|Gastroesophageal reflux  
disease|C0017168|||C0017168|LNC;MEDLINEPLUS;MTH;NCI;OMIM;SNOMEDCT|||  
GERD|Gastroesophageal reflux disease (disorder)|||C0017168|SNOMEDCT|||  
GERD|Gastroesophageal reflux disease [Ambiguous]|||C0017168|SNOMEDCT|||  
GERD|Gastroesophageal reflux disease|C0017168|||C0017168|SNOMEDCT|||  
GERD|Oesophageal reflux|C0017168;C0559234|||C0017168|SNOMEDCT|||  
GERD|Reflux, Gastric Acid|C0017168|||C0017168|MSH|||  
GERD|Reflux, Gastro-Esophageal|C0017168|||C0017168|MSH|||  
GERD|Reflux, Gastro-oesophageal|C0017168|||C0017168|MSH|||  
GERD|Reflux, Gastroesophageal|C0017168|||C0017168|MSH;NDFRT|||  
GERD|acid reflux|C0017168|||C0017168|CHV|||  
GERD|disease gastro-esophageal reflux|C0017168|||C0017168|CHV|||  
GERD|diseases esophageal reflux|C0017168|||C0017168|CHV|||  
GERD|esophageal reflux|C0017168;C0559234|||C0017168|CHV;NCI|||  
GERD|esophageal reflux disease|C0017168|||C0017168|CHV|||  
GERD|gastroesophageal reflux disease|C0017168|||C0017168|CHV|||  
GERD|gastric reflux|C0017168;C0558176|||C0017168|NCI|||  
GERD|gastro esophageal reflux|C0017168|||C0017168|CHV|||  
GERD|gastro oesophageal reflux|C0017168|||C0017168|CHV|||  
GERD|gastro-esophageal reflux|C0017168|||C0017168|CHV|||  
GERD|gastro-esophageal reflux disease|C0017168|||C0017168|CHV|||  
GERD|gastro-oesophageal reflux|C0017168|||C0017168|CHV|||  
GERD|gastroesophageal reflux|C0017168|||C0017168|CHV;CSP;NCI|1|0.009|  
GERD|gastroesophageal reflux  
disease|C0017168|1|1.000|C0017168|CHV;LNC;MEDLINEPLUS;MSH;MTH;NCI;NDFRT;OMIM;SNO  
MEDCT|1|0.991|1  
GERD|gastroesophageal reflux disease (GERD)|C0017168|||C0017168|CHV|||  
GERD|gastroesophageal reflux|C0017168|||C0017168|CHV|||  
GERD|gastroesophageal reflux disease|C0017168|||C0017168|CHV|||  
GERD|ge reflux|C0017168|||C0017168|CHV|||  
GERD|gerd|C0017168|||C0017168|CHV|||  
GERD|gerding|||C0017168|CHV|||  
GERD|oesophageal reflux|C0017168;C0559234|||C0017168|CHV|||  
GERD|reflux|C0017168;C0232483;C1882919|||C0017168|NCI|||  
GERD|reflux acid|C0017168|||C0017168|CHV|||  
GERD|reflux disease esophageal|||C0017168|CHV|||  
GERD|reflux esophageal|||C0017168|CHV|||  
GERD|reflux gastroesophageal|||C0017168|CHV|||  
GFR|Creatinine clearance|C0812399|||1|0.0023|  
GFR|Filtration Rate, Glomerular|C0017654;C1561549|||C0017654|MSH|||  
GFR|Filtration Rates, Glomerular|C0017654|||C0017654|MSH|||  
GFR|GFR|C0017654;C1424601|||C0017654;C1424601|AOD;HUGO;NCI;OMIM|||  
GFR|GUANINE NUCLEOTIDE EXCHANGE FACTOR FOR RAP1|C1424601|||C1424601|OMIM|||  
GFR|Glomerular Filtration Rate|C0017654;C1561549|||C0017654|MSH;MTH;NCI|||  
GFR|Glomerular Filtration Rates|C0017654|||C0017654|MSH|||  
GFR|Glomerular filtration rate|C0017654;C1561549|||C0017654|LCH;LNC;SNOMEDCT|||  
GFR|Glomerular filtration rate (function)|||C0017654|SNOMEDCT|||  
GFR|Glomerular filtration rate (observable entity)|||C0017654|SNOMEDCT|||  
GFR|Glomerular filtration rate, NOS|C0017654;C1561549|||C0017654|SNOMEDCT|||  
GFR|Glomerular filtration rate, function (observable  
entity)|||C0017654|SNOMEDCT|||  
GFR|Inulin clearance|||1|0.0025|

GFR|KIAA0277|C1424601|||C1424601|HUGO;OMIM|||  
GFR|M-Ras-regulated GEF|||C1424601|HUGO|||  
GFR|MR-GEF|C1424601|||C1424601|HUGO|||  
GFR|MRAS-REGULATED GUANINE NUCLEOTIDE EXCHANGE  
FACTOR|C1424601|||C1424601|OMIM|||  
GFR|MRGEF|C1424601|||C1424601|OMIM|||  
GFR|RAP GUANINE NUCLEOTIDE EXCHANGE FACTOR 5|C1424601|||C1424601|OMIM|||  
GFR|RAPGEF5|C1424601|||C1424601|HUGO;OMIM|||  
GFR|RAPGEF5 gene|C1424601|||C1424601|HUGO;MTH|||  
GFR|Rap guanine nucleotide exchange factor (GEF) 5|||C1424601|HUGO|||  
GFR|Rate, Glomerular Filtration|C0017654;C1561549|||C0017654|MSH|||  
GFR|Rates, Glomerular Filtration|C0017654|||C0017654|MSH|||  
GFR|filtration glomerular rate|C0017654|||C0017654|CHV|||  
GFR|gfr|C0017654;C1424601|||C0017654|CHV|||  
GFR|glomerular filtration|C0232809|||1|0.0069|  
GFR|glomerular filtration  
rate|C0017654;C1561549|1|1.000|C0017654;C1561549|AOD;CHV;CSP;LCH;LNC;MSH;MTH;NCI  
;SNOMEDCT|1|0.9857|1  
GFR|growth factor receptor|C0206454|||1  
GFR|grunting, flaring, retracting|||1  
GFR|rate filtration glomerular|||C0017654|CHV|||  
GFR|renal function|C0232804|||1|0.0025|  
GGT|(5-L-Glutamyl)-peptide:amino-acid 5-  
glutamyltransferase|||C0017040|MSH;NDFRT|||  
GGT|CD224|C1415053|||C1415053|HUGO|||  
GGT|D22S672|C1415053|||C1415053|HUGO|||  
GGT|D22S732|C1415053|||C1415053|HUGO|||  
GGT|GAMMA-GLUTAMYLTRANSFERASE 1|C1415053|||C1415053|OMIM|||  
GGT|GGT|C1415053|||C0017040;C0202035;C1415053|AOD;CHV;NCI;OMIM|||  
GGT|GGT - Gamma-glutamyl transferase|C0017040|||C0017040|SNOMEDCT|||  
GGT|GGT measurement|C0202035|||C0202035|SNOMEDCT|||  
GGT|GGT1|C1415053|||C1415053|HUGO;OMIM|||  
GGT|GGT1 gene|C1415053|||C1415053|HUGO;MTH|||  
GGT|GGTP|||C0017040;C0202035|MSH;MTH;NCI;NDFRT|||  
GGT|GGTP measurement|C0202035|||C0202035|SNOMEDCT|||  
GGT|GTP measurement|C0202035|||C0202035|SNOMEDCT|||  
GGT|Gamma Glutamyl Transferase|C0017040;C0202035|||C0202035|NCI|||  
GGT|Gamma Glutamyl Transpeptidase Measurement|C0202035|||C0202035|NCI|||  
GGT|Gamma glutamyl transferase|C0017040;C0202035|||C0017040|LNC|||  
GGT|Gamma glutamyl transferase measurement|C0202035|||C0202035|MTH;SNOMEDCT|||  
GGT|Gamma glutamyl transferase measurement (procedure)|||C0202035|SNOMEDCT|||  
GGT|Gamma glutamyl transpeptidase measurement|C0202035|||C0202035|SNOMEDCT|||  
GGT|Gamma-GT|C0017040;C1324645|||C0017040|NCI|||  
GGT|Gamma-Glutamyl Transpeptidase|C0017040|||C0017040|NCI|||  
GGT|Gamma-Glutamyl transferase|C0017040;C0202035|||C0017040|MTH|||  
GGT|Gamma-glutamyl transferase|C0017040;C0202035|||C0017040|MTH;SNOMEDCT|||  
GGT|Gamma-glutamyl transferase level|C0202035|||C0202035|SNOMEDCT|||  
GGT|Gamma-glutamyl transpeptidase|C0017040|||C0017040|SNOMEDCT|||  
GGT|Glutamyl Transpeptidase|C0017040|||C0017040|MSH;NDFRT|||  
GGT|Glutamyl transpeptidase|C0017040|||C0017040|SNOMEDCT|||  
GGT|Transpeptidase, Glutamyl|C0017040|||C0017040|MSH|||  
GGT|Transpeptidase, gamma-Glutamyl|C0017040|||C0017040|MSH|||  
GGT|activity|C0026606;C0205177;C0439167;C0441655;C1561536|||1|0.0091|  
GGT|galactosylhydroxylsyl glucosyltransferase|C0077685|||C0077685|MSH|||  
GGT|gamma GTP|C0017040;C1324645|||C0017040|SNOMEDCT|||  
GGT|gamma Glutamyl Transpeptidase|C0017040|||C0017040|MSH;MTH|||  
GGT|gamma Glutamyltransferase|C0017040;C0202035|||C0017040|MSH|||

GGT|gamma glutamyl transferase|C0017040;C0202035|||C0017040|AOD;CHV|||  
GGT|gamma glutamyl transferase level test|C0202035|||C0202035|CHV|||  
GGT|gamma glutamyl transpeptidase|C0017040|||C0017040|CHV|||  
GGT|gamma glutamyltransferase|C0017040;C0202035|||C0017040|AOD;CHV|1|0.0464|  
GGT|gamma glutamyltranspeptidase|C0017040|||C0017040|AOD;CHV;CSP|||  
GGT|gamma-Glutamyl Transpeptidase|C0017040|||C0017040|MSH;NDFRT|||  
GGT|gamma-Glutamyltransferase|C0017040;C0202035|||C0017040|MSH;NDFRT;SNOMEDCT|||  
GGT|gamma-Glutamyltransferase (substance)|||C0017040|SNOMEDCT|||  
GGT|gamma-Glutamyltransferase [Chemical/Ingredient]|||C0017040|NDFRT|||  
GGT|gamma-glutamyl transferase|C0017040;C0202035|||C0017040|CHV|1|0.2894|  
GGT|gamma-glutamyl transpeptidase|C0017040|||C0017040|AOD;CHV|1|0.3976|  
GGT|gamma-  
glutamyltransferase|C0017040;C0202035|1|0.998|C0017040|CHV;MSH;NDFRT;SNOMEDCT|||  
1  
GGT|gamma-glutamyltransferase 1|C1415053|||C1415053|HUGO|||  
GGT|gamma-glutamyltranspeptidase|C0017040|||1|0.1911|  
GGT|gammaglutamyltransferase|C0017040;C0202035|||C0017040|CHV;MSH;NDFRT|1|0.0082  
|  
GGT|ggt test|C0202035|||C0202035|CHV|||  
GGT|ggtp|||C0017040|CHV|||  
GGT|glutamyl transpeptidase|C0017040|||C0017040|AOD;CHV;CSP|||  
GGT|serum gamma-glutamyltransferase|||1|0.0582|  
GGT|test ggt|C0202035|||C0202035|CHV|||  
GI|ADENYLATE CYCLASE INHIBITORY PROTEIN|C1415142|||C1415142|OMIM|||  
GI|G PROTEIN, ALPHA-INHIBITING 1|||C1415142|OMIM|||  
GI|GASTROINTESTINAL PROBLEM|C0017187|||C0017187|COSTAR|||  
GI|GI|||C0017187;C0017540;C0521362;C1136206;C1996906|CHV;LNC;NCI;OMIM|||  
GI|GI - in LOINC|C1996906|||C1996906|MTH|||  
GI|GIB|C0017540|||C0017540|NCI|||  
GI|GIBALTAR|C0017540|||C0017540|NCI|||  
GI|GIGANTEA|||1|0.0034|  
GI|GNAI1|C1415142;C1517337|||C1415142|HUGO;NCI;OMIM|||  
GI|GNAI1 Gene|C1415142|||C1415142|NCI|||  
GI|GNAI1 gene|C1415142|||C1415142|HUGO;MTH|||  
GI|GUANINE NUCLEOTIDE-BINDING PROTEIN, ALPHA-INHIBITING ACTIVITY POLYPEPTIDE  
1|||C1415142|OMIM|||  
GI|Gastrointestinal|C0521362;C1559265;C2707256|||C0521362|LNC;NCI;OMIM|||  
GI|Gastrointestinal problem|C0017187|||C0017187|MTH|||  
GI|Gastrointestinal tract problem|C0017187|||C0017187|SNOMEDCT|||  
GI|Gastrointestinal tract problem (finding)|||C0017187|SNOMEDCT|||  
GI|Gb|C0041700;C1551090|||C1551090|NCI|||  
GI|General Inquiry|||1  
GI|Gi|||C1415142;C1551090;C1553044|NCI;OMIM|||  
GI|Gil protein alpha subunit|C1415142;C1517337|||C1415142|HUGO|||  
GI|Gibi|C1553044|||C1553044|MTH;NCI|||  
GI|Gibraltar|C0017540|||C0017540|LCH;MSH;MTH;NCI;SNOMEDCT|||  
GI|Gibraltar (geographic location)|||C0017540|SNOMEDCT|||  
GI|Gilbert|C1551090|||C1551090|HL7V3.0;NCI|||  
GI|Gingival Index|C0017569|||1  
GI|Gingival inflammation|||1|0.002|  
GI|Glass ionomer|C0061297|||1|0.0039|  
GI|Glucagon immunoreactivity|||1|0.0031|  
GI|Glycemic Index|C1136206|||C1136206|MSH;MTH;NCI|||  
GI|Glycemic Index Number|C1136206|||C1136206|MSH|||  
GI|Glycemic Index Numbers|C1136206|||C1136206|MSH|||  
GI|Glycemic Indices|C1136206|||C1136206|MSH|||  
GI|Group I|C0441843|||1|0.0116|

GI|Guanine Nucleotide Binding Protein (G Protein), Alpha Inhibiting Activity Polypeptide 1 Gene||||C1415142|NCI|||  
GI|INHIBITORY G PROTEIN|C0086706;C1415142|||C1415142|OMIM|||  
GI|Units Of Measure - Gilbert|C1551090|||C1551090|MTH|||  
GI|adenylate cyclase|C0001492;C1382029|||1|0.002|  
GI|gastro intestinal|C0521362;C1559265;C2707256|||C0521362|CHV|||  
GI|gastro-intestinal|C0521362;C1559265;C2707256|||C0521362|CHV|1|0.02|  
GI|gastroenterology|C0017163;C1555759;C1555978|||1|0.0034|  
GI|gastrointestinal|C0521362;C1559265;C2707256|1|1.000|C0521362;C1559265|CHV;LNC;MTH;NCI;OMIM|1|0.8484|1  
GI|gastrointestinal (GI)|C0521362;C1559265;C2707256|||C0521362|CHV|||  
GI|gastrointestinal problem|C0017187|||C0017187|CHV|||  
GI|gastrointestinal problems|C0017187|||C0017187|CHV|||  
GI|gastrointestinal tract|C0017189;C1281182|||1|0.0149|  
GI|gelatin infusion|||1|  
GI|gender identity|C0017249|||1|  
GI|gi problems|C0017187|||C0017187|CHV|||  
GI|gibi|C1553044|||C1553044|HL7V3.0|||  
GI|gigantocellular reticular nucleus|C0262242|||1|0.0017|  
GI|gill|C0017558;C1552935|||1|  
GI|gingival index|C0017569|||C0017569|CHV;MSH|||  
GI|gingival indices|C0017569|||1|0.0014|  
GI|glass ionomer|C0061297|||C0061297|CHV;MSH|||  
GI|glass ionomer cement|C0017597|||1|0.002|  
GI|global ischemia|||1|0.0025|  
GI|glomerular index|||1|  
GI|glucose  
intolerance|C0271650|||C0271650|AOD;CHV;COSTAR;DXP;MSH;NCI;NDFRT;OMIM;SNOMEDCT|1|0.0034|1  
GI|glycaemic indices|C1136206|||1|0.0014|  
GI|glycemic index|C1136206|||C1136206|CHV;MSH;MTH;NCI|1|0.027|1  
GI|glycemic indices|C1136206|||C1136206|CHV|||  
GI|glycoprotein I|||1|0.0124|  
GI|good impression|||1|  
GI|granuloma inguinale|C0018190|||1|  
GI|growth inhibiting|||1|  
GI|growth inhibition|||1|0.0034|1  
GI|guanine nucleotide binding protein (G protein), alpha inhibiting activity polypeptide 1||||C1415142|HUGO|||  
GI|guided imagery|C0150627|||1|  
GI|inhibitory G protein|C0086706;C1415142|||1|0.0135|  
GI|inhibitory GTP-binding protein|||1|0.0076|  
GI|inhibitory guanine nucleotide binding protein|||1|0.0076|  
GI|inhibitory guanine nucleotide regulatory protein|||1|0.0034|  
GJ|GD|||C0018232|NCI|||  
GJ|GJ|||C0018232|NCI|||  
GJ|GRD|C0018213;C0018232|||C0018232|NCI|||  
GJ|GRENADA|C0018232|||C0018232|NCI|||  
GJ|Grenada|C0018232|||C0018232|AOD;MSH;MTH;NCI;SNOMEDCT|||  
GJ|Grenada (geographic location)|||C0018232|SNOMEDCT|||  
GJ|gap junction|C0206117;C2984290|||1|0.5208|1  
GJ|gastric juice|C0017133|||1|  
GJ|gastrojejunal|C0545827|1|1.000|||  
GJ|gastrojejunostomy|C0399839|||1|0.0938|1  
GJ|grapefruit juice|C0452456|||1|0.0469|1  
GJ|grenada|C0018232|||C0018232|CHV|||  
GJ|junctional conductance|||1|0.3385|

GT|>|||C0439093|SNOMEDCT|||  
GT|> (qualifier value)|C1285164|||C0439093|SNOMEDCT|||  
GT|Deficiency of GP 2 b 3 a complex|||C0040015|NDFRT|||  
GT|G protein transducin|||1|0.0114|  
GT|GLANZMANN DISEASE|C0040015|||C0040015|DXP|||  
GT|GLANZMANN THROMBASTHENIA|C0040015|||C0040015|OMIM|||  
GT|GLYCOPROTEIN COMPLEX IIb-IIIa, DEFICIENCY OF|||C0040015|OMIM|||  
GT|GP IIb-IIIa COMPLEX, DEFICIENCY OF|||C0040015|OMIM|||  
GT|GT|||C0018367;C0040015;C0439093|NCI;OMIM|||  
GT|GTM|C0018367|||C0018367|NCI|||  
GT|GUATEMALA|C0018367|||C0018367|NCI|||  
GT|Gambling Task|||1|0.025|  
GT|Gamow-Teller|||1|  
GT|Generation time|||1|0.0114|  
GT|Glanzmann Thrombasthenia|C0040015|||C0040015|MSH;NCI;NDFRT|||  
GT|Glanzmann thrombasthenia|C0040015|||C0040015|OMIM|||1|  
GT|Glanzmann thromboasthenia|C0040015|||C0040015|SNOMEDCT|||  
GT|Glanzmann's disease|C0040015|||C0040015|SNOMEDCT|||  
GT|Glanzmann's syndrome|C0040015|||C0040015|SNOMEDCT|||  
GT|Glanzmann's thrombasthenia|C0040015|||C0040015|CSP;SNOMEDCT|1|0.2023|  
GT|Glanzmann's thrombasthenia (disorder)|||C0040015|SNOMEDCT|||  
GT|Glanzmann-Naegeli disorder|C0040015|||C0040015|SNOMEDCT|||  
GT|Glanzsmann's disease|||C0040015|SNOMEDCT|||  
GT|Gliotoxin|C0017641|||1|0.0205|  
GT|Glycoprotein IIb/IIIa defect|||C0040015|SNOMEDCT|||  
GT|Glycoprotein IIb/IIIa defect (disorder)|||C0040015|SNOMEDCT|||  
GT|Greater Than|C0439093|||C0439093|MTH;NCI|||  
GT|Greater than|C0439093|||C0439093|HL7V2.5;HL7V3.0|||  
GT|Greater-than symbol >|||C0439093|SNOMEDCT|||  
GT|Greater-than symbol > (qualifier value)|||C0439093|SNOMEDCT|||  
GT|Guatemala|C0018367|||C0018367|AOD;CSP;LCH;MSH;MTH;NCI;SNOMEDCT|||  
GT|Guatemala (geographic location)|||C0018367|SNOMEDCT|||  
GT|Hereditary haemorrhagic thrombasthenia|C0040015|||C0040015|SNOMEDCT|||  
GT|Hereditary hemorrhagic thrombasthenia|C0040015|||C0040015|SNOMEDCT|||  
GT|Hereditary thromboasthenia|C0040015|||C0040015|SNOMEDCT|||  
GT|Hereditary thromboasthenia, NOS|C0040015|||C0040015|SNOMEDCT|||  
GT|L-glutamic acid50-L-tyrosine50|||1|0.0523|  
GT|PLATELET FIBRINOGEN RECEPTOR, DEFICIENCY OF|||C0040015|OMIM|||  
GT|PLATELET GLYCOPROTEIN IIb-IIIa DEFICIENCY|C0040015|||C0040015|OMIM|||  
GT|Platelet Fibrinogen Receptor, Deficiency of|||C0040015|MSH|||  
GT|Platelet fibrinogen receptor, deficiency of|||C0040015|NDFRT|||  
GT|Platelet glycoprotein 2 b-3a deficiency|C0040015|||C0040015|NDFRT|||  
GT|THROMBASTHENIA|C0040015|||C0040015|CST;DXP|||  
GT|THROMBASTHENIA OF GLANZMANN AND NAEGELI|||C0040015|OMIM|||  
GT|Thrombasthenia|C0040015|||C0040015|MSH;MTH;MTHICD9;NCI;NDFRT;SNOMEDCT|||  
GT|Thrombasthenia [Disease/Finding]|||C0040015|NDFRT|||  
GT|Thrombasthenia of Glanzmann and Naegeli|||C0040015|MSH;NDFRT|||  
GT|Thrombasthenia, Glanzmann|C0040015|||C0040015|MSH|||  
GT|Thrombasthenia, NOS|C0040015|||C0040015|SNOMEDCT|||  
GT|Thrombasthenia, hemorrhagic|C0040015|||C0040015|MTHICD9|||  
GT|Thrombasthenia, hereditary|C0040015|||C0040015|MTHICD9|||  
GT|Thrombasthenias|C0040015|||C0040015|MSH|||  
GT|Thromboasthenia|C0040015|||C0040015|SNOMEDCT|||  
GT|Thromboasthenia, NOS|C0040015|||C0040015|SNOMEDCT|||  
GT|Thrombocytasthenia|C0040015|||C0040015|MTHICD9|||  
GT|UDP-Glc|||1|0.0205|  
GT|UDP-glucuronosyltransferase|C0041560|||1|0.0227|

GT|UDP-glucuronyltransferase|C0041560|||||1|0.0318|  
GT|drop|C1321095;C1705648;C2347093;C2348338|||||1  
GT|gait|C0016928|||||1  
GT|gait training|C0085673|||C0085673|CHV;SNOMEDCT|||1  
GT|galactosyl transferase|C0016964;C0702242|||||1  
GT|galactosyltransferase|C0016964;C0702242|||||1|0.0705|  
GT|gamma-glutamyl transferase|C0017040;C0202035|||||1  
GT|gamma-glutamyl transpeptidase|C0017040|||||1|0.0159|  
GT|gamma-glutamyltransferase|C0017040;C0202035|||||1|0.0591|  
GT|gastrostomy|C0017196;C0546256|||C0017196;C0546256;C0595806;C1522614|AOD;CHV;I  
CD9CM;LCH;MSH;MTH;MTHMST;NCI;SNOMEDCT|||  
GT|gastrostomy tube|C0150595;C1549523;C2985542|1|0.892|||1|0.0136|1  
GT|gene therapy|C0017296|||||1|0.0295|1  
GT|generation time|||||1  
GT|genetic therapy|||||1  
GT|genital tubercle|C0231058;C1281767|||||1|0.0205|  
GT|germ tube|C1819077|||||1|0.0182|  
GT|giant|C0017547|||||1|0.0432|  
GT|gingiva treatment|||||1  
GT|gingival tissue|||||1|0.0114|  
GT|glanzmann thrombasthenia|C0040015|||C0040015|CHV|||  
GT|glanzmann's disease|C0040015|||C0040015|CHV|||  
GT|glanzmann's thrombasthenia|C0040015|||C0040015|CHV|||  
GT|glanzmanns thrombasthenia|C0040015|||C0040015|CHV|||  
GT|glucagon test|C0337437|||||1  
GT|glucose tolerance|C0178665|1|0.004|C0178665|CHV;CSP;LNC|1|0.0727|1  
GT|glucose transport|C0178666|||C0178666|CHV;CSP;GO|1|0.0136|1  
GT|glucose transporter|C0017742|||||1|0.0636|  
GT|glucosyltransferase|C0119452|||C0119452|CHV;CSP;MTH|||  
GT|glucuronosyltransferase|C0041560|||||1|0.0227|  
GT|glucuronyl transferase|C0041560|||||1  
GT|glucuronyltransferase|C0041560|||C0041560|MSH;NDFRT|||  
GT|glutamyl  
transpeptidase|C0017040|1|0.060|C0017040|AOD;CHV;CSP;MSH;NDFRT;SNOMEDCT|||1  
GT|glutathione  
transferase|C0017837|||C0017837|CHV;CSP;LCH;MSH;NDFRT;SNOMEDCT|1|0.0409|  
GT|glycityrosine|||||1  
GT|glycosyltransferase|C0085249|||C0085249;C1152069|CHV;CSP;MTH;NCI;SNOMEDCT|||  
GT|glycyltyrosine|C0061748|||C0061748|MSH|||  
GT|grand total|||||1  
GT|granulation  
tissue|C0018180|||C0018180|AOD;CHV;LCH;MSH;NCI;SNOMEDCT|1|0.0159|1  
GT|great toe|C0018534;C1281588|||C0018534;C1281588|CHV;FMA;LNC;SNOMEDCT;UWDA|||1  
GT|greater than|C0439093|||C0439093|CHV|||  
GT|greater  
trochanter|C0223865;C1279114|||C0223865;C1279114|CHV;FMA;SNOMEDCT;UWDA|||1  
GT|green tea|C1384640;C1704263|||||1|0.0295|1  
GT|group tension|||||1  
GT|group  
therapy|C0033971;C1527374|||C0033971;C1527374|AOD;CHV;CSP;LNC;MSH;MTH;NCI;SNOMED  
CT|||1  
GT|guatemala|C0018367|||C0018367|CHV|||  
GT|gutta||1|0.032|||||  
GT|thrombasthenia|C0040015|||C0040015|CHV;CSP|||  
GT|thromboasthenia|C0040015|||C0040015|CHV|||  
GT|thrombocytasthenia|C0040015|||C0040015|CHV|||  
GT|tissue conductance|||||1|0.0614|

GTT|DROPS|C0991568;C1321095;C2347093|||C1321095|NCI|||  
GTT|Drop|C1321095;C1705648;C2347093;C2348338|||C0991568;C1321095;C2347093|NCI;SN  
OMEDCT|||  
GTT|Drop (qualifier value)|||C1321095|SNOMEDCT|||  
GTT|Drop - unit of product usage|C1321095|||C1321095|SNOMEDCT|||  
GTT|Drop - unit of product usage (qualifier value)|||C1321095|SNOMEDCT|||  
GTT|Drop Dosage Form|C0991568|||C0991568|NCI|||  
GTT|Drop Dose Form|C0991568|||C0991568|NCI|||  
GTT|Drop Dosing Unit|||C1321095|NCI|||  
GTT|Drop Unit|C1321095|||C1321095|NCI|||  
GTT|Drop measurement|C1321095|||C1321095|MTH|||  
GTT|Drops|C0991568;C1321095;C2347093|||C0991568;C1321095|HL7V3.0;NDFRT;SNOMEDCT|  
||  
GTT|Drops - Drug Form|C0991568|||C0991568|MTH|||  
GTT|Drops [Dose Form]|C0991568|||C0991568|NDFRT|||  
GTT|Drops dose form|C0991568|||C0991568|SNOMEDCT|||  
GTT|Drops dose form (qualifier value)|||C0991568|SNOMEDCT|||  
GTT|GESTATIONAL TROPHOBLASTIC NEOPL|||C1135868|MSH|||  
GTT|GTT|||C1135868|NCI;PDQ|||  
GTT|GTT - Glucose tolerance test|C0017741|||C0017741|SNOMEDCT|||  
GTT|Gestational Trophoblastic Neoplasia|C1135868|||C1135868|MSH|||  
GTT|Gestational Trophoblastic Neoplasm|C1135868|||C1135868|MSH;NCI|||  
GTT|Gestational Trophoblastic Neoplasms|C1135868|||C1135868|MSH;MTH;NDFRT|||  
GTT|Gestational Trophoblastic Neoplasms [Disease/Finding]|||C1135868|NDFRT|||  
GTT|Gestational Trophoblastic Tumor|C1135868|||C1135868|NCI|||  
GTT|Gestational trophoblastic neoplasia|C1135868|||C1135868|SNOMEDCT|||  
GTT|Gestational trophoblastic neoplasm|C1135868|||C1135868|SNOMEDCT|||  
GTT|Gestational trophoblastic neoplasm (disorder)|||C1135868|SNOMEDCT|||  
GTT|Gestational trophoblastic neoplasm (morphologic  
abnormality)|||C1135868|SNOMEDCT|||  
GTT|Gestational trophoblastic tumor|C1135868|||C1135868|PDQ;SNOMEDCT|||  
GTT|Gestational trophoblastic tumor (disorder)|||C1135868|SNOMEDCT|||  
GTT|Gestational trophoblastic tumour|C1135868|||C1135868|SNOMEDCT|||  
GTT|Glucose Tolerance Test|C0017741|||C0017741|MSH;MTH;NCI|||  
GTT|Glucose Tolerance Tests|C0017741|||C0017741|MSH|||  
GTT|Glucose challenge test|C0017741|||C0017741|SNOMEDCT|||  
GTT|Glucose tolerance test|C0017741|||C0017741|MTH;SNOMEDCT|||  
GTT|Glucose tolerance test (procedure)|||C0017741|SNOMEDCT|||  
GTT|Glucose tolerance test NOS|C0017741|||C0017741|SNOMEDCT|||  
GTT|Glucose tolerance test NOS (procedure)|||C0017741|SNOMEDCT|||  
GTT|Glucose tolerance test, NOS|C0017741|||C0017741|SNOMEDCT|||  
GTT|Glucose tolerance tests|C0017741|||C0017741|LCH|||  
GTT|Gtt|||C1321095|NCI|||  
GTT|Gtts|C0017741;C1321095|||C1321095|SNOMEDCT|||  
GTT|Medical Drop|C2347093|||C2347093|MTH;NCI|||  
GTT|Metric Drop|C1321095|||C1321095|NCI|||  
GTT|Neoplasia, Gestational Trophoblastic|C1135868|||C1135868|MSH|||  
GTT|Neoplasm, Gestational Trophoblastic|C1135868|||C1135868|MSH|||  
GTT|Neoplasms, Gestational Trophoblastic|C1135868|||C1135868|MSH|||  
GTT|OGTT - Oral glucose tolerance test|C0017741|||C0017741|SNOMEDCT|||  
GTT|Pharmacist's Drop|||C1321095|NCI|||  
GTT|TROPHOBLASTIC NEOPL GESTATIONAL|||C1135868|MSH|||  
GTT|Trophoblastic Neoplasia, Gestational|C1135868|||C1135868|MSH|||  
GTT|Trophoblastic Neoplasm, Gestational|C1135868|||C1135868|MSH|||  
GTT|Trophoblastic Neoplasms, Gestational|C1135868|||C1135868|MSH;NDFRT|||  
GTT|X4|C1321095|||C1321095|NCI|||  
GTT|[drp]|C0675739;C1413979;C1421412;C2347093;C2985158|||C2347093|NCI|||

GTT|challenge glucose testing|C0017741|||C0017741|CHV|||  
GTT|drip||1|0.002|||  
GTT|drop|C1321095;C1705648;C2347093;C2348338|||C1321095|CHV;HL7V3.0|||  
GTT|drop as a measurement|C1321095|||C1321095|CHV|||  
GTT|drop(s)|||C1321095|NCI|||  
GTT|drops|C0991568;C1321095;C2347093|||C2347093|NCI|||1  
GTT|gamma-glutamyltransferase|C0017040;C0202035|1|0.006|||  
GTT|gelatin-tellurite-taurocholate|||1  
GTT|gestational transient thyrotoxicosis|||1  
GTT|gestational trophoblastic disease|C1135868;C2931618|||C1135868|NCI|||  
GTT|gestational trophoblastic neoplasia|C1135868|||C1135868|NCI|||  
GTT|gestational trophoblastic tumor|C1135868|||C1135868|NCI;PDQ;SNOMEDCT|1|0.186|1  
GTT|glucose challenge test|C0017741|||C0017741|CHV|||  
GTT|glucose procedure testing tolerance|C0017741|||C0017741|CHV|||  
GTT|glucose test tolerance|C0017741|||C0017741|CHV|||  
GTT|glucose testing tolerance|C0017741|||C0017741|CHV|||  
GTT|glucose tests tolerance|C0017741|||C0017741|CHV|||  
GTT|glucose tolerance test|C0017741|1|0.980|C0017741|AOD;CHV;CSP;MSH;MTH;NCI;SNOMEDCT|1|0.814|1  
GTT|glucose tolerance tests|C0017741|||C0017741|CHV|||  
GTT|gtt|||C0017741;C0991568;C1321095;C2347093|CHV;NCI|||  
GTT|gtts|C0017741;C1321095|||C0017741|CHV|||  
GTT|guttae||1|0.012|||  
GTT|trophoblastic tumor GTT|C1135868|||C1135868|PDQ|||  
GTT|trophoblastic tumor, gestational|C1135868|||C1135868|PDQ|||  
GU|GENITOURINARY|C0042066;C2709259|||C0042066|OMIM|||  
GU|GQ|C0014651|||C0018309|NCI|||  
GU|GU|||C0018309;C0042066;C2709258|NCI;OMIM|||  
GU|GUAM|C0018309|||C0018309|NCI|||  
GU|GUM|C0017562;C0812395|||C0018309|NCI|||  
GU|Genitourinary|C0042066;C2709259|||C2709258|NCI|||  
GU|Genitourinary Route of Administration|C2709258|||C2709258|NCI|||  
GU|Genitourinary Route of Drug Administration|C2709258|||C2709258|MTH|||  
GU|Genitourinary System|C0042066;C1280973|||C0042066|MSH;NCI|||  
GU|Genitourinary Systems|C0042066|||C0042066|MSH|||  
GU|Genitourinary Tract|C0042027;C0042066;C1283794|||C0042066|NCI|||  
GU|Genitourinary system|C0042066;C1280973|||C0042066|LNC;MTH;SNOMEDCT|||  
GU|Genitourinary system, NOS|C0042066;C1280973|||C0042066|SNOMEDCT|||  
GU|Genitourinary systems|C0042066|||C0042066|LNC|||  
GU|Genitourinary tract|C0042027;C0042066;C1283794|||C0042066|LNC;SNOMEDCT|||  
GU|Genitourinary tract, NOS|C0042027;C0042066;C1283794|||C0042066|SNOMEDCT|||  
GU|GenitourinaryRoute|C2709258|||C2709258|HL7V3.0|||  
GU|Glucose uptake|C0599781|||1|0.0688|  
GU|Guam|C0018309|||C0018309|AOD;MSH;MTH;NCI;SNOMEDCT|||  
GU|Guam (geographic location)|||C0018309|SNOMEDCT|||  
GU|Structure of genitourinary system|C0042066|||C0042066|SNOMEDCT|||  
GU|Structure of genitourinary system (body structure)|||C0042066|SNOMEDCT|||  
GU|System, Genitourinary|C0042066;C1280973|||C0042066|MSH|||  
GU|System, Urogenital|C0042066|||C0042066|MSH|||  
GU|Systema urinaria|C0042066;C1508753|||C0042066|UWDA|||  
GU|Systems, Genitourinary|C0042066|||C0042066|MSH|||  
GU|Systems, Urogenital|C0042066|||C0042066|MSH|||  
GU|Urogenital System|C0042066|||C0042066|CST;MSH;NCI|||  
GU|Urogenital Systems|C0042066|||C0042066|MSH|||  
GU|Urogenital Tract|C0042066|||C0042066|NCI|||  
GU|Urogenital structure|C0042066|||C0042066|SNOMEDCT|||

GU|Urogenital structure (body structure)|||C0042066|SNOMEDCT|||  
GU|Urogenital system|C0042066|||C0042066|SNOMEDCT|||  
GU|Urogenital system, NOS|C0042066|||C0042066|SNOMEDCT|||  
GU|gastric|C0038351;C1704242|||1|0.0529|  
GU|gastric  
ulcer|C0038358|||C0038358|AOD;CCS;CHV;COSTAR;CSP;CST;DXP;ICD9CM;MEDLINEPLUS;MSH;  
MTH;MTHMST;NCI;NDFRT;OMIM;SNOMEDCT|1|0.4471|1  
GU|gastric upset|||1|1  
GU|genitourinary|C0042066;C2709259|1|1.000|C0042066;C2709258;C2709259|CHV;LNC;NC  
I;OMIM|1|0.3095|1  
GU|genitourinary system|C0042066;C1280973|||C0042066|CHV;NCI|||  
GU|genitourinary tract|C0042027;C0042066;C1283794|||C0042066|CHV|||  
GU|glucose uptake|C0599781|||C0599781|CHV;CSP;GO|||1  
GU|glucose utilization|||1|0.0529|  
GU|glycogenic unit|||1|1  
GU|gonococcal  
urethritis|C0018078|||C0018078|CHV;COSTAR;MTH;MTHICD9;NCI;SNOMEDCT|1|0.0344|1  
GU|gravitational ulcer|C0042344|||C0042344|SNOMEDCT|||1  
GU|guam|C0018309|||C0018309|CHV|||  
GU|reproductive and urinary system|||C0042066|CHV|||  
GU|units|C0439148;C1519795|||1|0.0344|  
GU|urinary system|C0042066;C1508753|||C0042066|CHV|||  
GU|urogenital|C0042066|||C0042066|CHV|||  
GU|urogenital structure|C0042066|||C0042066|CHV|||  
GU|urogenital system|C0042066|||C0042066|AOD;CHV|||  
GU|urogenital system (urinary part)|||C0042066|CSP|||  
GU|urogenital systems|C0042066|||C0042066|CHV|||  
GVHD|Disease, Graft-Versus-Host|||C0018133|MSH|||  
GVHD|Disease, Graft-vs-Host|||C0018133|MSH|||  
GVHD|Disease, Homologous Wasting|C0018133|||C0018133|MSH|||  
GVHD|Disease, Runt|C0018133|||C0018133|MSH|||  
GVHD|Diseases, Graft-Versus-Host|||C0018133|MSH|||  
GVHD|Diseases, Graft-vs-Host|||C0018133|MSH|||  
GVHD|GRAFT VERSUS HOST DIS|||C0018133|MSH|||  
GVHD|GRAFT VERSUS HOST DISEASE|C0018133;C2984293|||C0018133|DXP|||  
GVHD|GRAFT VS HOST DIS|||C0018133|MSH|||  
GVHD|GVH|C0018133|||C0018133|DXP|||  
GVHD|GVHD|||C0018133;C0278845|CSP;DXP;NCI;PDQ|||  
GVHD|GVHD - Graft-versus-host disease|C0018133|||C0018133|SNOMEDCT|||  
GVHD|GVHD prophylaxis/therapy|||C0278845|NCI|||  
GVHD|Graft Versus Host Disease|C0018133;C2984293|||C0018133|MSH;NCI|||  
GVHD|Graft Versus Host Disease Prophylaxis/Therapy|||C0278845|NCI|||  
GVHD|Graft Vs. Host Disease|||C0018133|NCI|||  
GVHD|Graft versus host disease|C0018133;C2984293|||C0018133|SNOMEDCT|||  
GVHD|Graft versus host disease (disorder)|||C0018133|SNOMEDCT|||  
GVHD|Graft versus host disease [Ambiguous]|||C0018133|SNOMEDCT|||  
GVHD|Graft versus host disease prophylaxis/therapy|||C0278845|MTH|||  
GVHD|Graft versus host disease, NOS|C0018133;C2984293|||C0018133|SNOMEDCT|||  
GVHD|Graft vs Host Disease|C0018133|||C0018133|MSH;NCI;NDFRT|||  
GVHD|Graft vs Host Disease [Disease/Finding]|||C0018133|NDFRT|||  
GVHD|Graft-Versus-Host Disease|C0018133;C2984293|||C0018133|MSH;NDFRT|||  
GVHD|Graft-Versus-Host Diseases|C0018133|||C0018133|MSH|||  
GVHD|Graft-Versus-Host-Disease|C0018133;C2984293|||C0018133|NCI|||  
GVHD|Graft-versus-host NOS|||C0018133|ICD9CM|||  
GVHD|Graft-versus-host disease|C0018133;C2984293|||C0018133|ICD9CM;SNOMEDCT|||  
GVHD|Graft-versus-host disease (disorder)|||C0018133|SNOMEDCT|||  
GVHD|Graft-versus-host disease, unspecified|||C0018133|ICD9CM|||

GVHD|Graft-vs-Host Disease|C0018133|||C0018133|MSH;MTH;NDFRT|||  
GVHD|Graft-vs-Host Diseases|||C0018133|MSH|||  
GVHD|HOMOL WASTING DIS|||C0018133|MSH|||  
GVHD|Homologous Wasting Disease|C0018133|||C0018133|MSH;NDFRT|||  
GVHD|RUNT DIS|||C0018133|MSH|||  
GVHD|Runt Disease|C0018133|||C0018133|MSH;NCI;NDFRT|||  
GVHD|Runting syndrome|C0018133;C1279471|||C0018133|SNOMEDCT|||  
GVHD|acute graft-versus-host-disease|C0856825|||1|0.0056|  
GVHD|autoimmune foreign transplant disease|C0018133|||C0018133|CSP|||  
GVHD|chronic graft-versus-host-disease|C0867389|||1|0.0043|  
GVHD|disease graft host versus|||C0018133|CHV|||  
GVHD|disease graft host vs|||C0018133|CHV|||  
GVHD|disease graft versus host|||C0018133|CHV|||  
GVHD|graft versu host disease|||C0018133|CHV|||  
GVHD|graft versus host disease|C0018133;C2984293|||C0018133|CHV;CSP;PDQ|||  
GVHD|graft versus host disease (GVHD) prophylaxis therapy|||C0278845|CHV|||  
GVHD|graft versus host disease prophylaxis/therapy|||C0278845|PDQ|||  
GVHD|graft vs host disease|C0018133|||C0018133|CHV|1|0.0089|  
GVHD|graft-versus-host  
disease|C0018133;C2984293|1|1.000|C0018133|CHV;NCI;PDQ|1|0.9812|1  
GVHD|graft-versus-host diseases|C0018133|||C0018133|CHV|||  
GVHD|graft-vs-host disease|C0018133|||C0018133|CHV|||  
GVHD|gvh|C0018133|||C0018133|CHV|||  
GVHD|gvh disease|C0018133|||C0018133|CHV|||  
GVHD|gvhd|||C0018133;C0278845|CHV|||  
GVHD|homologous wasting disease|C0018133|||C0018133|CSP|||  
GVHD|host versus graft disease|||C0018133|CHV;PDQ|||  
GVHD|host vs graft disease|||C0018133|CHV|||  
GVHD|prophylaxis/therapy, GVHD|||C0278845|PDQ|||  
GVHD|prophylaxis/therapy, graft versus host disease|||C0278845|PDQ|||  
GVHD|runt disease|C0018133|||C0018133|CSP|||  
GVH|Disease, Graft-Versus-Host|||C0018133|MSH|||  
GVH|Disease, Graft-vs-Host|||C0018133|MSH|||  
GVH|Disease, Homologous Wasting|C0018133|||C0018133|MSH|||  
GVH|Disease, Runt|C0018133|||C0018133|MSH|||  
GVH|Diseases, Graft-Versus-Host|||C0018133|MSH|||  
GVH|Diseases, Graft-vs-Host|||C0018133|MSH|||  
GVH|GRAFT VERSUS HOST DIS|||C0018133|MSH|||  
GVH|GRAFT VERSUS HOST DISEASE|C0018133;C2984293|||C0018133|DXP|||  
GVH|GRAFT VS HOST DIS|||C0018133|MSH|||  
GVH|GVH|C0018133|||C0018133|DXP|||  
GVH|GVHD|||C0018133|CSP;DXP;NCI;PDQ|||  
GVH|GVHD - Graft-versus-host disease|C0018133|||C0018133|SNOMEDCT|||  
GVH|Graft Versus Host Disease|C0018133;C2984293|||C0018133|MSH;NCI|||  
GVH|Graft Vs. Host Disease|||C0018133|NCI|||  
GVH|Graft versus host disease|C0018133;C2984293|||C0018133|SNOMEDCT|||  
GVH|Graft versus host disease (disorder)|||C0018133|SNOMEDCT|||  
GVH|Graft versus host disease [Ambiguous]|||C0018133|SNOMEDCT|||  
GVH|Graft versus host disease, NOS|C0018133;C2984293|||C0018133|SNOMEDCT|||  
GVH|Graft vs Host Disease|C0018133|||C0018133|MSH;NCI;NDFRT|||  
GVH|Graft vs Host Disease [Disease/Finding]|||C0018133|NDFRT|||  
GVH|Graft-Versus-Host Disease|C0018133;C2984293|||C0018133|MSH;NDFRT|||  
GVH|Graft-Versus-Host Diseases|C0018133|||C0018133|MSH|||  
GVH|Graft-Versus-Host reaction|C0018134|||1|0.0358|  
GVH|Graft-Versus-Host-Disease|C0018133;C2984293|||C0018133|NCI|||  
GVH|Graft-versus-host NOS|||C0018133|ICD9CM|||  
GVH|Graft-versus-host disease|C0018133;C2984293|||C0018133|ICD9CM;SNOMEDCT|||

GVH|Graft-versus-host disease (disorder)|||C0018133|SNOMEDCT|||  
GVH|Graft-versus-host disease, unspecified|||C0018133|ICD9CM|||  
GVH|Graft-vs-Host Disease|C0018133|||C0018133|MSH;MTH;NDFRT|||  
GVH|Graft-vs-Host Diseases|||C0018133|MSH|||  
GVH|HOMOL WASTING DIS|||C0018133|MSH|||  
GVH|Homologous Wasting Disease|C0018133|||C0018133|MSH;NDFRT|||  
GVH|RUNT DIS|||C0018133|MSH|||  
GVH|Runt Disease|C0018133|||C0018133|MSH;NCI;NDFRT|||  
GVH|Runting syndrome|C0018133;C1279471|||C0018133|SNOMEDCT|||  
GVH|autoimmune foreign transplant disease|C0018133|||C0018133|CSP|||  
GVH|disease graft host versus|||C0018133|CHV|||  
GVH|disease graft host vs|||C0018133|CHV|||  
GVH|disease graft versus host|||C0018133|CHV|||  
GVH|generalized visceral hypersensitivity|||1  
GVH|graft versu host disease|||C0018133|CHV|||  
GVH|graft versus host||1|1.000|||1  
GVH|graft versus host disease|C0018133;C2984293|||C0018133|CHV;CSP;PDQ|||  
GVH|graft vs host disease|C0018133|||C0018133|CHV|||  
GVH|graft-versus-host|||1|0.747|  
GVH|graft-versus-host  
disease|C0018133;C2984293|||C0018133;C2984293|CHV;ICD9CM;MSH;NCI;NDFRT;PDQ;SNOME  
DCT|1|0.0167|  
GVH|graft-versus-host diseases|C0018133|||C0018133|CHV|||  
GVH|graft-vs-host|||1|0.2005|  
GVH|graft-vs-host disease|C0018133|||C0018133|CHV|||  
GVH|gvh|C0018133|||C0018133|CHV|||  
GVH|gvh disease|C0018133|||C0018133|CHV|||  
GVH|gvhd|||C0018133|CHV|||  
GVH|homologous wasting disease|C0018133|||C0018133|CSP|||  
GVH|host versus graft disease|||C0018133|CHV;PDQ|||  
GVH|host vs graft disease|||C0018133|CHV|||  
GVH|runt disease|C0018133|||C0018133|CSP|||  
GYN|GYN|C0018417;C0205480|||C0018417;C0205480|NCI|||  
GYN|GYNECOL|||C0018417|MSH|||  
GYN|Gynaecologic|C0205480|||C0205480|SNOMEDCT|||  
GYN|Gynaecology|C0018417;C0237419|||C0018417|SNOMEDCT|||  
GYN|Gynaecology (qualifier value)|||C0018417|SNOMEDCT|||  
GYN|Gynecologic|C0205480|||C0205480|MTH;NCI;SNOMEDCT|||  
GYN|Gynecologic (qualifier value)|||C0205480|SNOMEDCT|||  
GYN|Gynecology|C0018417;C0237419|||C0018417|LCH;LNC;MSH;MTH;NCI;SNOMEDCT|||  
GYN|Gynecology (qualifier value)|||C0018417|SNOMEDCT|||  
GYN|gynaecologic|C0205480|||C0205480|CHV|||  
GYN|gynaecology|C0018417;C0237419|||C0018417|CHV|||  
GYN|gynecologic|C0205480|||C0205480|CHV;MTH;NCI;SNOMEDCT|||1  
GYN|gynecological|C0018417|||C0018417|CHV|||  
GYN|gynecologist|C0237419|||C0237419|CHV;MTH;NCI;SNOMEDCT|||  
GYN|gynecology|C0018417;C0237419|1|1.000|C0018417;C0237419|CHV;CSP;HL7V3.0;LCH;L  
NC;MSH;MTH;NCI;SNOMEDCT|||1  
GYN|gynecology (field)|||C0018417|AOD|||  
HCG|CG - Chorionic gonadotrophin|C0018062|||C0018062|SNOMEDCT|||  
HCG|CG - Chorionic gonadotropin|C0018062|||C0018062|SNOMEDCT|||  
HCG|CG preparation|C0018062|||C0018062|SNOMEDCT|||  
HCG|CGA|||C1413366|HUGO;OMIM|||  
HCG|CGA gene|C1413366|||C1413366|HUGO;MTH|||  
HCG|CGB5|C1424291|||C1424291|HUGO;OMIM|||  
HCG|CGB5 gene|C1424291|||C1424291|HUGO;MTH|||  
HCG|CGH|||C1415796;C1855900|HUGO;OMIM|||

HCG|CHORIONIC GONADOTROPIN, ALPHA CHAIN|C1413366|||C1413366|OMIM|||  
HCG|CHORIONIC GONADOTROPIN, BETA POLYPEPTIDE 5|C1424291|||C1424291|OMIM|||  
HCG|Choriogonadotrophin|C0018062|||C0018062|SNOMEDCT|||  
HCG|Choriogonadotropin|C0018062|||C0018062|LNC;MSH;NDFRT;SNOMEDCT|||  
HCG|Choriogonadotropin (substance)|||C0018062|SNOMEDCT|||  
HCG|Choriogonadotropin Beta|C1880076|||C1880076|NCI|||  
HCG|Choriogonadotropin Beta Measurement|C1880076|||C1880076|MTH;NCI|||  
HCG|Chorionic  
Gonadotropin|C0018062;C1527152|||C0018062|MSH;MTH;MTHSPL;NDFRT;RXNORM;USPMG|||  
HCG|Chorionic Gonadotropin [Chemical/Ingredient]|||C0018062|NDFRT|||  
HCG|Chorionic Gonadotropin, Human|C0018062;C1141639;C1527152|||C1141639|MSH|||  
HCG|Chorionic gonadotrophin|C0018062;C1527152|||C0018062|SNOMEDCT|||  
HCG|Chorionic gonadotrophin human|C1141639|||C1141639|SNOMEDCT|||  
HCG|Chorionic gonadotrophin preparation|C0018062|||C0018062|SNOMEDCT|||  
HCG|Chorionic gonadotrophin product|C0018062|||C0018062|SNOMEDCT|||  
HCG|Chorionic gonadotrophin, NOS|C0018062;C1527152|||C0018062|SNOMEDCT|||  
HCG|Chorionic gonadotropin|C0018062;C1527152|||C0018062|SNOMEDCT|||  
HCG|Chorionic gonadotropin human|C1141639|||C1141639|SNOMEDCT|||  
HCG|Chorionic gonadotropin preparation|C0018062|||C0018062|SNOMEDCT|||  
HCG|Chorionic gonadotropin preparation (product)|||C0018062|SNOMEDCT|||  
HCG|Chorionic gonadotropin preparation (substance)|||C0018062|SNOMEDCT|||  
HCG|Chorionic gonadotropin product|C0018062|||C0018062|SNOMEDCT|||  
HCG|Chorionic gonadotropin, NOS|C0018062;C1527152|||C0018062|SNOMEDCT|||  
HCG|Congenital, generalized hypertrichosis|||C1855900|OMIM|||  
HCG|FOLLICLE-STIMULATING HORMONE, ALPHA CHAIN|C1413366|||C1413366|OMIM|||  
HCG|FSHA|C1413366|||C1413366|HUGO;OMIM|||  
HCG|GLYCOPROTEIN HORMONES, ALPHA CHAIN|C0017963;C1413366|||C1413366|OMIM|||  
HCG|GONADOTROPIN, CHORIONIC|C0018062;C1527152|||C0018062|NDFRT;VANDF|||  
HCG|GONADOTROPIN, CHORIONIC|||C0018062|NDFRT;VANDF|||  
HCG|GPHA1|C1413366|||C1413366|HUGO|||  
HCG|GPHa|C1413366|||C1413366|HUGO|||  
HCG|Gonadotropin, Chorionic|C0018062;C1527152|||C0018062;C1527152|MSH;NCI|||  
HCG|Gonadotropin, Human Chorionic|C0018062;C1141639;C1527152|||C1141639|MSH|||  
HCG|HCG|C0106132|||C0018062;C1141639;C1413366;C1415796;C1424291;C1855900;C1880076|AOD;CHV;HUGO;LNC;MSH;NCI;OMIM;PDQ;SNOMEDCT|||  
HCG|HCG (Human Chorionic Gonadotropin)|C1141639|||C1141639|MSH|||  
HCG|HCG - Human chorionic gonadotrophin|C1141639|||C1141639|SNOMEDCT|||  
HCG|HCG - Human chorionic gonadotrophin product|C1141639|||C1141639|SNOMEDCT|||  
HCG|HCG - Human chorionic gonadotropin|C1141639|||C1141639|SNOMEDCT|||  
HCG|HCG - Human chorionic gonadotropin product|C1141639|||C1141639|SNOMEDCT|||  
HCG|HCG preparation|C1141639|||C1141639|SNOMEDCT|||  
HCG|HTC2|C1415796;C1855900|||C1415796;C1855900|HUGO;OMIM|||  
HCG|HTC2 gene|C1415796|||C1415796|HUGO;LNC;MTH|||  
HCG|HUMAN CHORIONIC GONADOTROPIN|C0018062;C1141639;C1527152|||C1527152|NCI|||  
HCG|HYPERTRICHOSIS, CONGENITAL GENERALIZED|C1855900|||C1855900|MTH;OMIM|||  
HCG|Human Chorionic  
Gonadotropin|C0018062;C1141639;C1527152|||C1141639;C1527152|MSH;MTH;NCI;RXNORM|||  
|  
HCG|Human choriogonadotropin|||1|0.0333|  
HCG|Human chorionic  
gonadotrophin|C0018062;C1141639;C1527152|||C1141639|SNOMEDCT|||  
HCG|Human chorionic gonadotrophin product|C1141639|||C1141639|SNOMEDCT|||  
HCG|Human chorionic gonadotrophin,  
NOS|C0018062;C1141639;C1527152|||C1141639|SNOMEDCT|||  
HCG|Human chorionic  
gonadotropin|C0018062;C1141639;C1527152|||C1141639|SNOMEDCT|||  
HCG|Human chorionic gonadotropin (product)|C1141639|||C1141639|SNOMEDCT|||

HCG|Human chorionic gonadotropin (substance)|||C1141639|SNOMEDCT|||  
HCG|Human chorionic gonadotropin product|C1141639|||C1141639|SNOMEDCT|||  
HCG|Human chorionic gonadotropin,  
NOS|C0018062;C1141639;C1527152|||C1141639|SNOMEDCT|||  
HCG|LHA|C1413366|||C1413366|HUGO;OMIM|||  
HCG|LUTEINIZING HORMONE, ALPHA CHAIN|C1413366|||C1413366|OMIM|||  
HCG|Pregnancy Test|C0032976;C1880076|||C1880076|NCI|||  
HCG|Pregnancy test|C0032976;C1880076|||C1880076|LNC|||  
HCG|Pregnancy urine hormone|C0018062|||C0018062|SNOMEDCT|||  
HCG|Recombinant Human Chorionic Gonadotropin|C1527152|||C1527152|MTH;NCI|||  
HCG|Recombinant chorionic gonadotrophin|||C1527152|SNOMEDCT|||  
HCG|Recombinant chorionic gonadotrophin (product)|||C1527152|SNOMEDCT|||  
HCG|Recombinant human chorionic gonadotrophin|C1527152|||C1527152|SNOMEDCT|||  
HCG|Recombinant human chorionic gonadotrophin (product)|||C1527152|SNOMEDCT|||  
HCG|Recombinant human chorionic gonadotrophin  
(substance)|||C1527152|SNOMEDCT|||  
HCG|Recombinant human chorionic gonadotropin|C1527152|||C1527152|SNOMEDCT|||  
HCG|THYROID-STIMULATING HORMONE, ALPHA CHAIN|C1413366|||C1413366|OMIM|||  
HCG|THYROTROPIN, ALPHA CHAIN|C1413366|||C1413366|OMIM|||  
HCG|TSHA|C1413366|||C1413366|HUGO;OMIM|||  
HCG|chorionic gonadotropin|C0018062;C1527152|||C0018062|CHV;CSP|||  
HCG|chorionic gonadotropin, alpha polypeptide|C1413366|||C1413366|HUGO|||  
HCG|chorionic gonadotropin, beta polypeptide 5|C1424291|||C1424291|HUGO|||  
HCG|follicle-stimulating hormone alpha subunit|C1413366|||C1413366|HUGO|||  
HCG|glycoprotein hormones, alpha  
polypeptide|C0017963;C1413366|||C1413366|HUGO|||  
HCG|hCG|C0106132|||C1141639;C1527152|NCI|||  
HCG|hCG preparation|C1141639|||C1141639|SNOMEDCT|||  
HCG|human chorionic  
gonadotrophin|C0018062;C1141639;C1527152|||C0018062|CHV|1|0.2781|  
HCG|human chorionic  
gonadotropin|C0018062;C1141639;C1527152|1|1.000|C0018062;C1141639|AOD;CHV|1|0.68  
67|1  
HCG|human chorionic gonadotropin  
(HCG)|C0018062;C1141639;C1527152|||C0018062|CHV|||  
HCG|human chorionic gonadotropin hormone|||1|0.0018|  
HCG|human chorionic gonadotropins|C0018062|||C0018062|CHV|||  
HCG|hypertrichosis 2 (generalized, congenital)|||C1415796|HUGO|||  
HCG|recombinant human chorionic gonadotropin|C1527152|||C1527152|PDQ|||  
HCG|rhCG|C1425338;C1527152|||C1527152|NCI|||  
HCT|Erythrocyte Volume, Packed|C0018935|||C0018935|MSH|||  
HCT|Erythrocyte Volumes, Packed|C0018935|||C0018935|MSH|||  
HCT|HCT|C0018935|||C0018935|AOD;NCI|||  
HCT|Haematocrit|C0018935;C0518014|||C0018935|SNOMEDCT|||  
HCT|Haematocrit (observable entity)|||C0018935|SNOMEDCT|||  
HCT|Haematocrit (procedure)|C0018935|||C0018935|SNOMEDCT|||  
HCT|Haematocrit - PCV|C0018935|||C0018935|SNOMEDCT|||  
HCT|Haematocrit - PCV - NOS|C0018935|||C0018935|SNOMEDCT|||  
HCT|Haematocrit - PCV - NOS (procedure)|||C0018935|SNOMEDCT|||  
HCT|Haematocrit determination|C0018935|||C0018935|SNOMEDCT|||  
HCT|Halstead Category Test|||1|0.009|  
HCT|Hct|C0018935|||C0018935|MTH|||  
HCT|Hct - Haematocrit|C0018935|||C0018935|SNOMEDCT|||  
HCT|Hct - Hematocrit|C0018935|||C0018935|SNOMEDCT|||  
HCT|Health Check Test|||1|  
HCT|Helical Computed Tomography|C0860888|||1|0.0213|  
HCT|Hematocrit|C0018935;C0518014|||C0018935|LCH;LNC;MSH;MTH;NCI;SNOMEDCT|||

HCT|Hematocrit - PCV|C0018935|||C0018935|SNOMEDCT|||  
HCT|Hematocrit - PCV - NOS|C0018935|||C0018935|SNOMEDCT|||  
HCT|Hematocrit - PCV - NOS (procedure)|||C0018935|SNOMEDCT|||  
HCT|Hematocrit Measurement|C0018935|||C0018935|NCI|||  
HCT|Hematocrit determination|C0018935|||C0018935|SNOMEDCT|||  
HCT|Hematocrit determination (procedure)|||C0018935|SNOMEDCT|||  
HCT|Hematocrit procedure|C0018935|||C0018935|MTH|||  
HCT|Hematocrits|C0018935|||C0018935|MSH|||  
HCT|Hematopoietic cell transplantation|||||1|0.1033|  
HCT|Packed Erythrocyte Volume|C0018935|||C0018935|MSH|||  
HCT|Packed Erythrocyte Volumes|C0018935|||C0018935|MSH|||  
HCT|Packed Red Cell Volume|C0018935|||C0018935|MSH|||  
HCT|Packed Red-Cell Volume|C0018935|||C0018935|MSH|||  
HCT|Packed Red-Cell Volumes|C0018935|||C0018935|MSH|||  
HCT|Packed cell volume|C0018935;C1318015|||C0018935|SNOMEDCT|||  
HCT|Packed cell volume (observable entity)|||C0018935|SNOMEDCT|||  
HCT|Packed cell volume measurement|C0018935|||C0018935|SNOMEDCT|||  
HCT|Packed cell volume measurement (procedure)|||C0018935|SNOMEDCT|||  
HCT|Red-Cell Volume, Packed|C0018935|||C0018935|MSH|||  
HCT|Red-Cell Volumes, Packed|C0018935|||C0018935|MSH|||  
HCT|Volume, Packed Erythrocyte|C0018935|||C0018935|MSH|||  
HCT|Volume, Packed Red-Cell|C0018935|||C0018935|MSH|||  
HCT|Volumes, Packed Erythrocyte|C0018935|||C0018935|MSH|||  
HCT|Volumes, Packed Red-Cell|C0018935|||C0018935|MSH|||  
HCT|haematocrit centrifugation technique|||||1|0.0074|  
HCT|haematocrit value|||||1|0.0049|  
HCT|head computerized tomography|C0202691|||||1|  
HCT|heart-circulation training|||||1|  
HCT|helical CT|C0860888|||||1|0.0139|  
HCT|helical computed tomography|C0860888|||C0860888|CHV;MSH;NCI|||  
HCT|hematocrit|C0018935;C0518014|||C0018935;C0518014|AOD;CHV;CSP;LCH;LNC;MSH;MTH  
;NCI;SNOMEDCT|1|0.6566|1|  
HCT|hematocrit level test|C0018935|||C0018935|CHV|||  
HCT|hematopoietic cell transplant|||||1|0.0107|  
HCT|hematopoietic stem cell transplant|||||1|  
HCT|histamine challenge test|C2697609|||||1|  
HCT|historic control trial|||||1|  
HCT|homocytotrophic|||||1|  
HCT|human calcitonin|C0770558|||C0770558|MTH;RXNORM;SNOMEDCT|1|0.091|1|  
HCT|human chorionic thyrotropin|C0063010|||||1|  
HCT|hundred count|||||1|  
HCT|hydrochlorothiazide|C0020261|1|1.000|||1|0.082|  
HCT|hydrocortisone|C0020268|||||1|  
HCTZ|2H-1,2,4-Benzothiadiazine-7-sulfonamide, 6-chloro-3,4-dihydro-, 1,1-  
dioxide||||C0020261|MSH;NDFRT|||  
HCTZ|6-Chloro-3,4-dihydro-2H-1,2,4-benzothiadiazine-7-sulfonamide 1,1-  
dioxide||||C0020261|NCI|||  
HCTZ|Dichlothiazide|C0020261|||C0020261|MSH;NDFRT|||  
HCTZ|Dihydrochlorothiazide|C0020261|||C0020261|MSH;NDFRT|||  
HCTZ|HCTZ|C0020261|||C0020261|MSH;NDFRT;SNOMEDCT|||  
HCTZ|HYDROCHLOROTHIAZIDE|C0020261|||C0020261|MTHFDA;MTHSPL;NCI;NDFRT;VANDF|||  
HCTZ|Hydrochlorothiazide|C0020261|||C0020261|LNC;MSH;MTHSPL;NCI;NDFRT;RXNORM;SNO  
MEDCT;USPMG|||  
HCTZ|Hydrochlorothiazide (product)|||C0020261|SNOMEDCT|||  
HCTZ|Hydrochlorothiazide (substance)|||C0020261|SNOMEDCT|||  
HCTZ|Hydrochlorothiazide [Chemical/Ingredient)|||C0020261|NDFRT|||  
HCTZ|hctz|C0020261|||C0020261|CHV|||



HELLP|Hemolysis-elevated liver enzymes-low platelet count syndrome (disorder)|||C0162739|SNOMEDCT|||  
HELLP|Syndrome of haemolysis, elevated liver enzymes and low platelet|||C0162739|SNOMEDCT|||  
HELLP|Syndrome of haemolysis, elevated liver enzymes and low platelet (disorder)|||C0162739|SNOMEDCT|||  
HELLP|Syndrome of hemolysis, elevated liver enzymes and low platelet|||C0162739|SNOMEDCT|||  
HELLP|Syndrome, HELLP|C0162739|||C0162739|MSH|||  
HELLP|elevated liver enzymes and low platelet|||1|0.6667|  
HELLP|hellp syndrome|C0162739|||C0162739|CHV|||  
HELLP|hellps syndrome|||C0162739|CHV|||  
HELLP|hemolysis elevated liver enzymes and low platelets|||1|0.3333|  
HELLP|hemolysis, elevated liver enzymes, low platelets||1|1.000|||1|  
HELLP|syndrome hellp|C0162739|||C0162739|CHV|||  
HIDA|HIDA|C0064964|||C0064964|MSH|||  
HIDA|LIDOFENIN|C0064964|||C0064964|NCI|||  
HIDA|Lidofenin|C0064964|||C0064964|NCI|||  
HIDA|N-(carboxymethyl)-N-(2-((2,6-dimethylphenyl)amino)-2-oxoethyl)glycine|||C0064964|MSH|||  
HIDA|hepatic 2,6-dimethyliminodiacetic acid|||1|  
HIDA|hepato-iminodiacetic acid|C0064964|||C0064964|MSH|||  
HIDA|hepatoiminodiacetic acid|C0064964|1|1.000|||1|  
HIDA|lidofenin|C0064964|||C0064964|CHV;MSH|||  
HIT|HIT|C0332159;C1708373|||C1708373|MTHICD9|||  
HIT|Headache Impact Test|||1|0.0209|  
HIT|hit|C0332159;C1708373|||C1708373|NCI|||  
HIT|hit - database search return|C1708373|||C1708373|MTH|||  
HIT|hit by|||C0332159|SNOMEDCT|||  
HIT|Holtzman Inkblot Technique|||1|0.0342|1|  
HIT|Hydrothermal Isometric Tension|||1|0.0152|  
HIT|Struck by|C0332159|||C0332159|MTH;SNOMEDCT|||  
HIT|Struck by (contextual qualifier)|||C0332159|SNOMEDCT|||  
HIT|Struck by (contextual qualifier) (qualifier value)|||C0332159|SNOMEDCT|||  
HIT|cell line|C0007600|||1|0.0114|  
HIT|haemagglutination inhibition test|C0018904|||1|0.0133|  
HIT|hemagglutination inhibition test|C0018904|||C0018904|AOD;CHV;CSP;MSH|1|0.0095|1|  
HIT|heparin-induced thrombocytopenia|C0272285|1|1.000|C0272285|CHV;MTHICD9;SNOMEDCT|1|0.8289|1|  
HIT|high-intensity interval training|||1|0.0114|  
HIT|histamine inhalation test|||1|  
HIT|histamine ion transfer|||1|  
HIT|histidine triad|||1|0.0361|  
HIT|hit|C0332159;C1708373|||C0332159|CHV|||  
HIT|hit by|||C0332159|CHV|||  
HIT|hitting|C0332159|||C0332159|CHV|||  
HIT|home infusion therapy|C0242945|||1|0.019|1|  
HIT|hypertrophic infiltrative tendinitis|||1|  
HIT|hypertrophied inferior turbinate|||1|  
HIV|AIDS Virus|C0019682;C0019704|||C0019682|MSH|||  
HIV|AIDS Viruses|C0019682|||C0019682|MSH|||  
HIV|AIDS virus|C0019682;C0019704|||C0019682|CHV;SNOMEDCT|||  
HIV|Acquired Immune Deficiency Syndrome Virus|C0019682|||C0019682|MSH|||  
HIV|Acquired Immunodeficiency Syndrome Virus|C0019682|||C0019682|MSH|||  
HIV|HIV|C0019682;C0019693;C0019699|||C0019682;C0019693;C0086413|AOD;CHV;CSP;HL7V 2.5;HL7V3.0;LNC;MEDLINEPLUS;MSH;MTH;NCI;SNOMEDCT|||

HIV|HIV - Human immunodeficiency virus|C0019682|||C0019682|SNOMEDCT|||  
HIV|HIV - Human immunodeficiency virus infection|C0019693|||C0019693|SNOMEDCT|||  
HIV|HIV DISEASE|C0019693|||C0019693|CST|||  
HIV|HIV INFECT|||C0019693|MSH|||  
HIV|HIV Infection|C0019693|||C0019693|COSTAR;MSH;NCI|||  
HIV|HIV Infections|C0019693|||C0019693|MSH;MTH;NDFRT|||  
HIV|HIV Infections [Disease/Finding]|||C0019693|NDFRT|||  
HIV|HIV Vaccine|C0086413|||C0086413|MTH;NCI|||  
HIV|HIV Vaccines|C0086413|||C0086413|MSH|||  
HIV|HIV disease|C0019693|||C0019693|CHV;MTHICD9|||  
HIV|HIV infection|C0019693|||C0019693|AOD;CCS;CHV;CSP;LNC;SNOMEDCT|||  
HIV|HIV infections|C0019693|||C0019693|CHV|||  
HIV|HIV seropositivity or positivity|||C0019693|AOD|||  
HIV|HIV vaccine|C0086413|||C0086413|CHV;CSP|||  
HIV|HIV vaccines|C0086413|||C0086413|CHV|||  
HIV|HIV, HUMAN IMMUNODEFICIENCY VIRUS|C0019682|||C0019682|NCI|||  
HIV|HIV/AIDS Vaccines|||C0086413|NCI|||  
HIV|HTLV III|C0019682|||C0019682|CSP|||  
HIV|HTLV III INFECT|||C0019693|MSH|||  
HIV|HTLV III Infections|C0019693|||C0019693|MSH|||  
HIV|HTLV III LAV INFECT|||C0019693|MSH|||  
HIV|HTLV III LAV Infections|C0019693|||C0019693|MSH|||  
HIV|HTLV WIII|||C0019682|MSH|||  
HIV|HTLV WIII INFECTIONS|||C0019693|MSH|||  
HIV|HTLV WIII LAV INFECTIONS|||C0019693|MSH|||  
HIV|HTLV-III|C0019682|||C0019682|MSH|||  
HIV|HTLV-III Infection|C0019693|||C0019693|MSH|||  
HIV|HTLV-III Infections|C0019693|||C0019693|MSH;NDFRT|||  
HIV|HTLV-III-LAV Infection|C0019693|||C0019693|MSH|||  
HIV|HTLV-III-LAV Infections|C0019693|||C0019693|MSH;NDFRT|||  
HIV|HTLV-III/LAV infection|C0019693|||C0019693|SNOMEDCT|||  
HIV|HTLV-III/LAV infection (disorder)|||C0019693|SNOMEDCT|||  
HIV|HTLV-III/LAV infection -RETIRED-|||C0019693|SNOMEDCT|||  
HIV|HTLV-III/LAV infection, NOS|C0019693|||C0019693|SNOMEDCT|||  
HIV|HUMAN IMMUNODEFIC VIRUS|||C0019682|MSH|||  
HIV|HUMAN IMMUNODEFIC VIRUSES|||C0019682|MSH|||  
HIV|HUMAN IMMUNODEFICIENCY VIRUS (HIV)|C0019682;C0019693|||C0019682|NCI|||  
HIV|HUMAN IMMUNODEFICIENCY VIRUS [HIV] INFECTION|C0019693|||C0019693|ICD9CM|||  
HIV|HUMAN LYMPHOTROPIC VIRUS TYPE III A T|||C0019682|MSH|||  
HIV|Human Immunodeficiency  
Virus|C0019682;C0019693|||C0019682;C0019693|MEDLINEPLUS;MSH;NCI|||  
HIV|Human Immunodeficiency Virus type 1|C0019704|||1|0.0071|  
HIV|Human Immunodeficiency Viruses|C0019682|||C0019682|MSH|||  
HIV|Human T Cell Leukemia Virus Type III|C0019682|||C0019682|MSH|||  
HIV|Human T Cell Lymphotropic Virus Type III|C0019682|||C0019682|MSH|||  
HIV|Human T Lymphotropic Virus Type III|C0019682|||C0019682|MSH|||  
HIV|Human T-Cell Leukemia Virus Type III|C0019682|||C0019682|MSH|||  
HIV|Human T-Cell Lymphotropic Virus Type III|C0019682|||C0019682|MSH|||  
HIV|Human T-Lymphotropic Virus Type III|C0019682|||C0019682|MSH|||  
HIV|Human T-lymphotropic virus, type III (HTLV-III)|||C0019682|SNOMEDCT|||  
HIV|Human immuno virus dis|||C0019693|ICD9CM|||  
HIV|Human immunodeficiency syndrome|||1|0.0008|  
HIV|Human immunodeficiency  
virus|C0019682;C0019693|||C0019682;C0019693|MEDLINEPLUS;NCBI;SNOMEDCT|||  
HIV|Human immunodeficiency virus (organism)|||C0019682|SNOMEDCT|||  
HIV|Human immunodeficiency virus [HIV] disease|C0019693|||C0019693|ICD9CM|||  
HIV|Human immunodeficiency virus disease|C0019693|||C0019693|MTHICD9|||

HIV|Human immunodeficiency virus infection|C0019693|||C0019693|SNOMEDCT|||  
HIV|Human immunodeficiency virus infection (disorder)|||C0019693|SNOMEDCT|||  
HIV|Human immunodeficiency virus infection, NOS|C0019693|||C0019693|SNOMEDCT|||  
HIV|Human immunodeficiency virus, NOS|C0019682;C0019693|||C0019682|SNOMEDCT|||  
HIV|IMMUNODEFIC VIRUS HUMAN|||C0019682|MSH|||  
HIV|IMMUNODEFIC VIRUSES HUMAN|||C0019682|MSH|||  
HIV|Immunodeficiency Virus, Human|C0019682;C0019693|||C0019682|MSH|||  
HIV|Immunodeficiency Viruses, Human|C0019682|||C0019682|MSH|||  
HIV|Infection, HIV|C0019693|||C0019693|MSH|||  
HIV|Infection, HTLV-III|C0019693|||C0019693|MSH|||  
HIV|Infection, HTLV-III-LAV|C0019693|||C0019693|MSH|||  
HIV|Infections, HIV|C0019693|||C0019693|MSH|||  
HIV|Infections, HTLV-III|C0019693|||C0019693|MSH|||  
HIV|Infections, HTLV-III-LAV|C0019693|||C0019693|MSH|||  
HIV|LAV|C0019682|||C0019682|CSP|||  
HIV|LAV-HTLV-III|C0019682|||C0019682|MSH|||  
HIV|LYMPHOTROPIC VIRUS TYPE III INFECTIONS HUMAN T|C0019693|||C0019693|MSH|||  
HIV|Lymphadenopathy Associated Virus|C0019682|||C0019682|MSH|||  
HIV|Lymphadenopathy-Associated Virus|C0019682|||C0019682|MSH|||  
HIV|Lymphadenopathy-Associated Viruses|C0019682|||C0019682|MSH|||  
HIV|Lymphadenopathy-associated virus (LAV)|C0019682|||C0019682|SNOMEDCT|||  
HIV|Lymphadenopathy-associated virus, type I (LAV-I)|||C0019682|SNOMEDCT|||  
HIV|T LYMPHOTROPIC VIRUS TYPE III INFECT HUMAN|||C0019693|MSH|||  
HIV|T Lymphotropic Virus Type III Infections, Human|C0019693|||C0019693|MSH|||  
HIV|T-Lymphotropic Virus Type III Infections,  
Human|C0019693|||C0019693|MSH;NDFRT|||  
HIV|VIRUS (HIV), HUMAN IMMUNODEFICIENCY|C0019682|||C0019682|NCI|||  
HIV|VIRUS HUMAN IMMUNODEFIC|||C0019682|MSH|||  
HIV|VIRUSES HUMAN IMMUNODEFIC|||C0019682|MSH|||  
HIV|Virus, AIDS|C0019682;C0019704|||C0019682|MSH|||  
HIV|Virus, Human Immunodeficiency|C0019682;C0019693|||C0019682|MSH|||  
HIV|Virus, Lymphadenopathy-Associated|C0019682|||C0019682|MSH|||  
HIV|Virus-HIV|C0019682|||C0019682|NCI|||  
HIV|Viruses, AIDS|C0019682|||C0019682|MSH|||  
HIV|Viruses, Human Immunodeficiency|C0019682|||C0019682|MSH|||  
HIV|Viruses, Lymphadenopathy-Associated|C0019682|||C0019682|MSH|||  
HIV|[X]Human immunodeficiency virus disease|||C0019693|SNOMEDCT|||  
HIV|[X]Human immunodeficiency virus disease (disorder)|||C0019693|SNOMEDCT|||  
HIV|[X]Unspecified human immunodeficiency virus [HIV]  
disease|||C0019693|SNOMEDCT|||  
HIV|[X]Unspecified human immunodeficiency virus [HIV] disease  
(disorder)|||C0019693|SNOMEDCT|||  
HIV|htlv iii|C0019682|||C0019682|CHV|||  
HIV|htlv-iii|C0019682|||C0019682|CHV|||  
HIV|human Immunodeficiency virus|C0019682;C0019693|||1|0.9823|  
HIV|human immunodeficiency|||1|0.0036|  
HIV|human immunodeficiency viral|||1|0.0006|  
HIV|human immunodeficiency  
virus|C0019682;C0019693|1|1.000|C0019682;C0019693|AOD;CHV;CSP;MEDLINEPLUS;MSH;NC  
BI;NCI;SNOMEDCT|||1  
HIV|human immunodeficiency virus (HIV)|C0019682;C0019693|||C0019682|CHV|||  
HIV|human immunodeficiency virus infection|C0019693|||C0019693|LNC|1|0.0037|  
HIV|human immunodeficiency virus type I|C0019704|||1|0.0006|  
HIV|human immunodeficiency virus-1|C0019704|||1|0.0014|  
HIV|lymphadenopathy associated virus|C0019682|||C0019682|CSP|||  
HIV|vaccine HIV|C0086413|||C0086413|CHV|||  
HJR|HEPATOJUGULAR REFLUX|C0239949|||C0239949|DXP|||

HJR|HJR|C0239949|||C0239949|DXP|||  
HJR|Hepatojugular reflux|C0239949|||C0239949|SNOMEDCT|||  
HJR|Hepatojugular reflux (finding)|||C0239949|SNOMEDCT|||  
HJR|hepatojugular reflux|C0239949|1|1.000|C0239949|CHV;DXP;SNOMEDCT|||1  
HJR|hjr|C0239949|||C0239949|CHV|||  
HLA|ANTIGENS IR|||C0019630|MSH|||  
HLA|Antigen, Class II|C0019630|||C0019630|MSH|||  
HLA|Antigen, I-A|C0019630|||C0019630|MSH|||  
HLA|Antigen, IA|C0019630|||C0019630|MSH|||  
HLA|Antigens, Class II|C0019630|||C0019630|MSH|||  
HLA|Antigens, HL-A|C0019721|||C0019721|MSH|||  
HLA|Antigens, HLA|C0019721|||C0019721|MSH|||  
HLA|Antigens, Human Leukocyte|C0019630;C0019721|||C0019721|MSH|||  
HLA|Antigens, Ia|C0019630|||C0019630|MSH|||  
HLA|Antigens, Ia-Like|C0019630|||C0019630|MSH|||  
HLA|Antigens, Immune Response|C0019630|||C0019630|MSH;NDFRT|||  
HLA|Antigens, Immune-Response-Associated|C0019630|||C0019630|MSH|||  
HLA|Antigens, Leukocyte|C0019721|||C0019721|MSH|||  
HLA|Class II Antigen|C0019630|||C0019630|MSH;NDFRT|||  
HLA|Class II Antigens|C0019630|||C0019630|MSH;NDFRT|||  
HLA|Class II Histocompatibility Antigens|C0019630|||C0019630|MSH;NDFRT|||  
HLA|Class II MHC Protein|C0019630;C2327910|||C0019630|NCI|||  
HLA|Class II Major Histocompatibility Antigens|C0019630|||C0019630|MSH;NDFRT|||  
HLA|HISTOCOMPATIBILITY ANTIGENS CLASS 02|||C0019630|MSH|||  
HLA|HL A Antigens|C0019721|||C0019721|MSH|||  
HLA|HL-A Antigens|C0019721|||C0019721|MSH;NDFRT|||  
HLA|HLA|C0019630;C1315037;C2327792|||C0019630;C0019721;C1315037;C2327792|AOD;CHV  
;FMA;LNC;MSH;NCI|||  
HLA|HLA - Human leukocyte antigen|C0019721|||C0019721|SNOMEDCT|||  
HLA|HLA - Human leukocyte antigen|C0019721|||C0019721|SNOMEDCT|||  
HLA|HLA A 00 ANTIGENS|||C0019721|MSH|||  
HLA|HLA Ag|C0019721|||C0019721|LNC|||  
HLA|HLA Antigens|C0019721|||C0019721|MSH;MTH;NDFRT|||  
HLA|HLA Antigens [Chemical/Ingredient]|||C0019721|NDFRT|||  
HLA|HLA antigen|C0019721|||C0019721|CSP;SNOMEDCT|||  
HLA|HLA antigen (substance)|||C0019721|SNOMEDCT|||  
HLA|HLA antigen, NOS|C0019721|||C0019721|SNOMEDCT|||  
HLA|HLA antigens|C0019721|||C0019721|AOD|||  
HLA|HLA factors|C0019721|||C0019721|AOD|||  
HLA|HLA tissue typing antigens|C1315037|||C1315037|MTH|||  
HLA|HLA tissue typing antigens and antibodies|||C1315037|LNC|||  
HLA|Histocompatibility Antigen, Class II|C0019630|||C0019630|NCI|||  
HLA|Histocompatibility Antigens Class II|C0019630|||C0019630|MSH;MTH;NDFRT|||  
HLA|Histocompatibility Antigens Class II  
[Chemical/Ingredient]|||C0019630|NDFRT|||  
HLA|Human Leukocyte Antigen|C0019629;C0019630;C0019721|||C0019630|NCI|||  
HLA|Human Leukocyte  
Antigens|C0019630;C0019721|||C0019630;C0019721|LNC;MSH;NDFRT|||  
HLA|Human Major Histocompatibility|||1|0.003|  
HLA|Human leukocyte antigen|C0019629;C0019630;C0019721|||C0019721|SNOMEDCT|||  
HLA|Human leukocyte antigen (HLA)|C0019629;C0019630;C0019721|||C0019721|CHV|||  
HLA|Human leukocyte antigen (HLA) antigen|||C0019721|SNOMEDCT|||  
HLA|Human leukocyte antigen|C0019629;C0019630;C0019721|||C0019721|SNOMEDCT|||  
HLA|Human leukocyte antigen (HLA) antigen|||C0019721|SNOMEDCT|||  
HLA|Human leukocyte antigen (HLA) antigen (substance)|||C0019721|SNOMEDCT|||  
HLA|Human leukocyte antigen complex|C2327792|||C2327792|FMA;MTH|||  
HLA|I A Antigen|C0019630|||C0019630|MSH|||

HLA|I-A Antigen|C0019630|||C0019630|MSH;NDFRT|||  
 HLA|I-A-Antigen|C0019630|||C0019630|MSH;NDFRT|||  
 HLA|IA Antigen|C0019630|||C0019630|MSH;NDFRT|||  
 HLA|IR ANTIGENS|||C0019630|MSH|||  
 HLA|Ia Antigens|C0019630|||C0019630|MSH;NDFRT|||  
 HLA|Ia Like Antigens|C0019630|||C0019630|MSH|||  
 HLA|Ia antigen|C0019630|||C0019630|CSP|||  
 HLA|Ia-Like Antigens|C0019630|||C0019630|MSH;NDFRT|||  
 HLA|Immune Response Antigens|C0019630|||C0019630|MSH;NDFRT|||  
 HLA|Immune Response Associated Antigens|C0019630|||C0019630|MSH|||  
 HLA|Immune-Response-Associated Antigens|C0019630|||C0019630|MSH;NDFRT|||  
 HLA|Leukocyte Antigens|C0019721|||C0019721|MSH;NDFRT|||  
 HLA|Leukocyte Antigens, Human|C0019630;C0019721|||C0019721|MSH|||  
 HLA|MHC Class II Molecule|C0019630|||C0019630|NCI|||  
 HLA|MHC Class II Protein|C0019630|||C0019630|NCI|||  
 HLA|MHC class II antigen|C0019630|||C0019630|CSP|||  
 HLA|Major Histocompatibility Complex Class II|C0019630|||C0019630|NCI|||  
 HLA|Symposium on major histocompatibility antigens|||1|0.0055|  
 HLA|antigen human leucocyte|C0019721|||C0019721|CHV|||  
 HLA|antigen human leukocyte|C0019721|||C0019721|CHV|||  
 HLA|antigen human leukocytes|C0019721|||C0019721|CHV|||  
 HLA|antigens hla|C0019721|||C0019721|CHV|||  
 HLA|antigens human leucocyte|C0019721|||C0019721|CHV|||  
 HLA|antigens human leucocytes|C0019721|||C0019721|CHV|||  
 HLA|antigens leukocytes|C0019721|||C0019721|CHV|||  
 HLA|blood lactate|||1|0.0035|  
 HLA|heart, lungs, abdomen|||1|  
 HLA|histocompatibility leukocyte antigen|||1|  
 HLA|histocompatibility locus antigen|||1|  
 HLA|histocompatibility system|||1|0.003|  
 HLA|hla antigens|C0019721|||C0019721|CHV|||  
 HLA|hla antigen|C0019721|||C0019721|CHV|||  
 HLA|hla antigens|C0019721|||C0019721|CHV|||  
 HLA|hlas|C0019721|||C0019721|CHV|||  
 HLA|homologous leukocyte antibody|||1|  
 HLA|horizontal long axial|||1|  
 HLA|human MHC|||1|0.0035|  
 HLA|human histocompatibility complex derived antigens  
 Antigen|C0019721|||C0019721|LNC|||  
 HLA|human leucocyte antigen|C0019629;C0019630;C0019721|||C0019721|CHV|1|0.1845|  
 HLA|human leukocyte|||1|0.0045|  
 HLA|human leukocyte antibody|||1|  
 HLA|human leukocyte  
 antigen|C0019629;C0019630;C0019721|1|1.000|C0019630;C0019721|CHV;CSP;NCI|1|0.781  
 |1|  
 HLA|human leukocyte antigen system|||1|  
 HLA|human leukocyte antigens|C0019630;C0019721|||C0019721|AOD;CHV|||  
 HLA|human lymphocyte antigen|C0019630|||C0019630|NCI|||  
 HLA|human major histocompatibility complex|||1|0.0115|  
 HLA|hypoplastic left atrium|C1970625|||1|  
 HLA|leukocyte antigen|C0019721|||C0019721|CHV|||  
 HN|HN|C0019905;C1537997;C1853668|||C0019905;C1537997;C1853668|HUGO;NCI;OMIM|||  
 HN|HND|C0018609;C0019905|||C0019905|NCI|||  
 HN|HO|C1832110|||C0019905|NCI|||  
 HN|HONDURAS|C0019905|||C0019905|NCI|||  
 HN|HUMANIN|C0966511;C1537997;C1853668|||C1853668|OMIM|||  
 HN|HUMANIN gene|C1853668|||C1853668|MTH|||

HN|Heymann nephritis|C1704378|||||1|0.097|  
HN|Honduras|C0019905|||C0019905|AOD;LCH;MSH;MTH;NCI;SNOMEDCT|||  
HN|Honduras (geographic location)|||C0019905|SNOMEDCT|||  
HN|Huckman number|||||1|  
HN|Humanin|C0966511;C1537997;C1853668|||||1|0.0428|  
HN|MT-RNR2|C1537997|||C1537997|HUGO|||  
HN|MT-RNR2 gene|C1537997|||C1537997|HUGO;MTH|||  
HN|MTRNR2|C1537997|||C1537997|OMIM|||  
HN|NATO code for nitrogen mustard|||||1|  
HN|RIBOSOMAL RNA, MITOCHONDRIAL, 16S|C1537997|||C1537997|OMIM|||  
HN|glycoprotein|C0017968|||||1|0.0164|  
HN|haemagglutinin-neuraminidase|C2985502|||||1|0.1332|  
HN|head and neck|||C0460004;C1283900|CHV;LNC;NCI;OMIM;SNOMEDCT|1|0.0329|1|  
HN|head nurse|C0018676|||C0018676|AOD;CHV;MSH|||  
HN|hemagglutinin neuraminidase|C2985502|||||1|  
HN|hemagglutinin-neuraminidase|C2985502|||||1|0.4786|  
HN|hemagglutinin-neuraminidase protein|||||1|0.0164|  
HN|hematemesis neonatorum|||||1|  
HN|hemorrhage of newborn|C0270183|||C0270183|SNOMEDCT|||1|  
HN|hereditary  
nephritis|C0027706;C1567741|||C0027706;C1567741|CHV;MSH;MTH;NCI;OMIM;SNOMEDCT|1|  
0.0247|1|  
HN|heterogeneous nuclear|||||1|0.023|  
HN|heteronuclear|||||1|0.0444|  
HN|high necrosis|||||1|  
HN|high nitrogen|||||1|  
HN|high nutrition||1|1.000|||||  
HN|hilar node|||||1|  
HN|histamine-containing neuron|||||1|  
HN|home nursing|C0019860|||C0019860|CHV;LCH;MSH|||1|  
HN|honduras|C0019905|||C0019905|CHV|||  
HN|humanin|C0966511;C1537997;C1853668|||C1537997|HUGO|||  
HN|hyaluronectin|||||1|0.0313|  
HN|hydronephrosis|C0020295|||||1|0.0164|  
HN|hyperplastic nodules|C0020510|||||1|0.028|  
HN|hypertensive nephrosclerosis|C0264657|||||1|  
HN|hypertrophic neuropathy|C0545036|||||1|  
HN|hypoglossal nucleus|C0228802|||||1|0.0148|  
HN|mitochondrially encoded 16S RNA|C1537997|||C1537997|HUGO|||  
HN|rRNA, 16S, MITOCHONDRIAL|C1537997|||C1537997|OMIM|||  
HPV|HPV|C0021344|||C0021344;C1512511|CHV;CSP;HL7V2.5;HL7V3.0;MEDLINEPLUS;NCI|||  
HPV|HPV - Human papillomavirus|C0021344|||C0021344|SNOMEDCT|||  
HPV|HPV Vaccine|C1512511|||C1512511|NCI|||  
HPV|HPV Vaccines|C1512511|||C1512511|MSH|||  
HPV|HPV vaccine|C1512511|||C1512511|NCI|||  
HPV|HUMAN PAPILOMAVIRUS|C0021344|||C0021344|NCI|||  
HPV|Haemophilus pertussis vaccine|||||1|  
HPV|Hart Park virus|C0300964|||||1|  
HPV|Human Papilloma Virus|C0021344|||C0021344|NCBI;NCI|||  
HPV|Human Papilloma Virus Vaccine|C1512511|||C1512511|MTH;NCI|||  
HPV|Human Papilloma Virus Vaccines|C1512511|||C1512511|MSH|||  
HPV|Human Papillomavirus|C0021344|||C0021344|MEDLINEPLUS;MTH;NCI|||  
HPV|Human Papillomavirus Vaccines|C1512511|||C1512511|MSH|||  
HPV|Human papilloma virus|C0021344|||C0021344|LNC|||  
HPV|Human papillomavirus|C0021344|||C0021344|NCBI;SNOMEDCT|||  
HPV|Human papillomavirus (organism)|||C0021344|SNOMEDCT|||  
HPV|Human papillomavirus group|C0021344|||C0021344|SNOMEDCT|||

HPV|Human papillomavirus group (organism)|||C0021344|SNOMEDCT|||  
HPV|Human papillomavirus group, NOS|C0021344|||C0021344|SNOMEDCT|||  
HPV|Human papillomavirus vaccine|C1512511|||C1512511|SNOMEDCT|||  
HPV|Human papillomavirus vaccine (product)|||C1512511|SNOMEDCT|||  
HPV|Human papillomavirus vaccine (substance)|||C1512511|SNOMEDCT|||  
HPV|Human papillomavirus, NOS|C0021344|||C0021344|SNOMEDCT|||  
HPV|PAPILLOMAVIRUS HUMAN|C0021344|||C0021344|NDFRT;VANDF|||  
HPV|Papillomavirus Vaccines, Human|C1512511|||C1512511|MSH|||  
HPV|Vaccines, Human Papillomavirus|C1512511|||C1512511|MSH|||  
HPV|Verruca vulgaris virus|C0021344|||C0021344|SNOMEDCT|||  
HPV|Wart virus|C0021344|||C0021344|SNOMEDCT|||  
HPV|Warts virus|||C0021344|SNOMEDCT|||  
HPV|heart period variability|||1|0.0034|  
HPV|hepatic portal vein|C0032718|||1|0.0017|1|  
HPV|hepatopancreatic parvovirus|C1067160|||1|0.003|  
HPV|hpv human papillomavirus|C0021344|||C0021344|CHV|||  
HPV|hpvs|C0021344|||C0021344|CHV|||  
HPV|human papilloma viru|C0021344|||C0021344|CHV|||  
HPV|human papilloma virus|C0021344|||C0021344|CHV|1|0.1218|  
HPV|human papilloma viruses|C0021344|||C0021344|CHV|||  
HPV|human papillomas virus|C0021344|||C0021344|CHV|||  
HPV|human papillomavirus|C0021344|1|1.000|C0021344;C0375016|AOD;CHV;CSP;ICD9CM;MEDLINEPLUS;MTH;NCBI;NCI;SNOMEDCT|1|0.8153|1|  
HPV|human papillomavirus (HPV)|C0021344|||C0021344|CHV|||  
HPV|human papillomavirus HPV|C0021344|||C0021344|NCBI|||  
HPV|human papillomavirus infection|C0343641|||1|0.0031|  
HPV|human papillomavirus vaccine|C1512511|||C1512511|NCI|||  
HPV|human papillomaviruses|C0021344|||C0021344|CHV|||  
HPV|human parvovirus|C1955655|||1|0.0048|1|  
HPV|human parvovirus B19|C0085274|||1|0.0017|  
HPV|hypoxic pulmonary vasoconstriction|||1|0.0451|1|  
HPV|virus wart|C0021344|||C0021344|CHV|||  
HPV|virus warts|||C0021344|CHV|||  
HPV|wart virus|C0021344|||C0021344|CHV;CSP|||  
HPV|warts virus|||C0021344|CHV|||  
HR|AU|C2348420|||C1415713|HUGO|||  
HR|CROATIA|C0010343|||C0010343|NCI|||  
HR|Cardiac rate|C0018810|||C0018810|SNOMEDCT|||  
HR|Cardiac rate (function)|||C0018810|SNOMEDCT|||  
HR|Cardiac rate (observable entity)|||C0018810|SNOMEDCT|||  
HR|Cardiac rate, NOS|C0018810|||C0018810|SNOMEDCT|||  
HR|Cardiac rate, function (observable entity)|||C0018810|SNOMEDCT|||  
HR|Croatia|C0010343|||C0010343|AOD;MSH;MTH;NCI;SNOMEDCT|||  
HR|Croatia (geographic location)|||C0010343|SNOMEDCT|||  
HR|HAIRLESS, MOUSE, HOMOLOG OF|||C1415713|OMIM|||  
HR|HOUR|C0439227;C0564385|||C0439227|NCI|||  
HR|HOURS|C0439227|||C0439227|NCI|||  
HR|HR|||C0010343;C0018810;C0332167;C1415713;C2265291|GO;HUGO;NCI;OMIM;SNOMEDCT|||  
HR|HR - Heart rate|||C0018810|SNOMEDCT|||  
HR|HR gene|C1415713|||C1415713|HUGO;MTH|||  
HR|HR-PCD|C2265291|||C2265291|GO|||  
HR|HRV|C0010343|||C0010343|NCI|||  
HR|Halstead-Reitan|||1|  
HR|Harrington rod|C0181119|||1|  
HR|Heart Rate|C0018810|||C0018810|MSH;NCI|||

HR|Heart Rates|C0018810|||C0018810|MSH|||  
HR|Heart rate|C0018810|||C0018810|LNC;SNOMEDCT|||  
HR|Heart rate (observable entity)|||C0018810|SNOMEDCT|||  
HR|Heart rate (observable)|||C0018810|SNOMEDCT|||  
HR|Heart rate (observable) (observable entity)|||C0018810|SNOMEDCT|||  
HR|Heart rate, NOS|C0018810|||C0018810|SNOMEDCT|||  
HR|High risk of|C0332167|||C0332167|MTH;SNOMEDCT|||  
HR|High risk of (contextual qualifier)|||C0332167|SNOMEDCT|||  
HR|High risk of (contextual qualifier) (qualifier value)|||C0332167|SNOMEDCT|||  
HR|High risk of -RETIRED-|||C0332167|SNOMEDCT|||  
HR|Hour|C0439227;C0564385|||C0439227|MTH;NCI|||  
HR|Hrtrate|C0018810|||C0018810|LNC|||  
HR|Human recombinant|||1|0.0037|  
HR|Hybrid resistance|C1369008|||1|0.0013|  
HR|O-(beta-hydroxyethyl)-rutosides|||1|0.0021|  
HR|Rate, Heart|C0018810|||C0018810|MSH|||  
HR|Rates, Heart|C0018810|||C0018810|MSH|||  
HR|cardiac rate|C0018810|||C0018810|CHV|||  
HR|cardiac rates|C0018810|||C0018810|CHV|||  
HR|croatia|C0010343|||C0010343|CHV|||  
HR|h|C0033727;C0369286;C0441932;C0564385;C1553030|||C0439227|NCI|||  
HR|h - hour|C0439227|||C0439227|SNOMEDCT|||  
HR|hairless|||1|0.0037|  
HR|hairless gene|||1|0.0008|  
HR|hairless homolog (mouse)|||C1415713|HUGO|||  
HR|hallux rigidus|C0264134|||1|  
HR|halorhodopsin|C0062108|||C0062108|MSH;NDFRT|||  
HR|hazard ratio|C2985465|||C2985465|NCI|1|0.0624|1|  
HR|health related|||1|  
HR|heart|C0018787;C1281570|||1|0.0009|  
HR|heart  
rate|C0018810|1|0.960|C0018810;C0488794|AOD;CHV;CSP;LNC;MSH;MTH;NCI;SNOMEDCT|1|0  
.8365|1|  
HR|heart rates|C0018810|||C0018810|CHV|||  
HR|hematopoietic reconstitution|||1|  
HR|hematopoietic resistance|||1|  
HR|hemerythrin|C0018976;C1149094|||1|0.001|  
HR|hemorrhagic retinopathy|||1|  
HR|heparin-releasable|||1|0.001|  
HR|hepatic resection|||1|0.0008|  
HR|hepatorenal|C0545792|||1|  
HR|heptad repeat|||1|0.0022|  
HR|heterosexual relations|||1|  
HR|high resolution|C1719039|||1|  
HR|high responders|||1|0.0037|  
HR|high responders to novelty|||1|0.0005|  
HR|high risk|C0332167|||C0332167|CHV|||1|  
HR|high risk of|C0332167|||C0332167|CHV|||  
HR|high risks|C0332167|||C0332167|CHV|||  
HR|high-resolution|C1719039|||1|0.0056|  
HR|high-risk|C0332167|||1|0.0149|  
HR|higher rate|||1|  
HR|histamine release|C0019595|||C0019595|CHV;CSP;MSH|1|0.0087|1|  
HR|homing receptor|||1|0.0013|  
HR|homologous  
recombination|C0599773;C2984295|||C0599773;C2984295|CSP;MSH;NCI|1|0.018|  
HR|homologous region|||1|0.0009|

HR|hormonal response|||||||1  
HR|hormone  
receptor|C0019929;C0083740;C1367453|||C0019929;C0083740;C1367453|CHV;CSP;MTH;NCI  
;OMIM|1|0.0006|  
HR|hospital record|C0019980|||||||1  
HR|hospital report|C0806434|||||||1  
HR|host range|C2936413|||C2936413|MSH|1|0.0016|  
HR|hour|C0439227;C0564385|||C0439227|CHV;HL7V2.5;HL7V3.0;NCI;SNOMEDCT|||1  
HR|hour (qualifier value)|||C0439227|SNOMEDCT|||  
HR|hours|C0439227|||C0439227|CHV;LNC;SNOMEDCT|1|0.001|  
HR|hr|||C0439227|CHV;NCI;SNOMEDCT|||  
HR|hfs|||C0439227|CHV|||  
HR|human  
resources|C0024752;C0220852;C0700103|1|0.034|C0024752;C0220852;C0700103|AOD;CHV;  
MSH;MTH|||1  
HR|hybrid resistance|C1369008|||C1369008|NCI|||  
HR|hydroxyethylrutoside|C0020354|||C0020354|CHV;MSH;NDFRT|||  
HR|hyperimmune reaction|||||||1  
HR|hypersensitive reaction|||||1|0.0036|  
HR|hypersensitive response|||||1|0.0208|  
HR|hypertensive retinopathy|C0152132|||||||1  
HR|hypophosphatemic rickets|C0733682;C1704375|||||||1  
HR|hypoxic reaction|||||||1  
HR|hypoxic responder|||||||1  
HR|light-driven chloride pump halorhodopsin|||||1|0.0003|  
HR|plant hypersensitive response|||C2265291|GO|||  
HR|plant-type hypersensitive response|C2265291|||C2265291|GO;MTH|||  
HR|resistant|C0332325;C2827757|||||1|0.0008|  
HR|rutosides|C0035976|||||1|0.0008|  
HSM|DKFZp761A179|C1537594|||C1537594|HUGO|||  
HSM|HSM|C1537594|||C1537594|HUGO|||  
HSM|LRR4B|C1537594|||C1537594|HUGO|||  
HSM|LRR4B gene|C1537594|||C1537594|HUGO;MTH|||  
HSM|heparin surface-modified intraocular lens|||||||1  
HSM|heparin-surface-modified|||||1|1|  
HSM|hepatosplenomegaly|C0019214|1|1.000|C0019214|CHV;CST;DXP;OMIM;SNOMEDCT|||1  
HSM|holosystolic murmur|C0232258|||C0232258|CHV;SNOMEDCT|||1  
HSM|leucine rich repeat containing 4B|C1537594|||C1537594|HUGO|||  
HS|Bedtime|C0521112|||C0521112|NCI;SNOMEDCT|||  
HS|Bedtime (qualifier value)|C0521112|||C0521112|MTH;SNOMEDCT|||  
HS|DNase I hypersensitive|||||1|0.0067|  
HS|DNase I hypersensitive sites|||||1|0.0113|  
HS|FTDCR1B|C1367673;C1705574|||C1367673;C1705574|HUGO;NCI|||  
HS|HS|C1275563|||C0521112;C1275563;C1367673;C1705574;C2674218|HL7V3.0;HUGO;NCI;O  
MIM|||  
HS|HS-142-1|C0122426|||||1|0.0046|  
HS|HS1|||C2674218|OMIM|||  
HS|HSNIK|C1335946;C1367673;C1705574|||C1367673;C1705574|HUGO;NCI;OMIM|||  
HS|Harmonic Scalpel|||||1|0.0063|  
HS|Hartmann solution|C0073385|||||||1  
HS|Hartmann-Shack|||||||1  
HS|Haynes-Stellite|||||||1  
HS|Headspace|||||1|0.0109|  
HS|Heparan sulfate|C0019143|||||1|0.255|  
HS|Hopelessness Scale|C0451217|||||1|0.0059|1  
HS|Hour Of Sleep|C0521112|||C0521112|NCI|||  
HS|Hs|C1275563|||C1552153|HL7V3.0|||

HS|Humic substances|C1449672|||||1|0.0222|  
HS|Hypochondriasis|C0020604|||||1|0.0105|  
HS|MAP3K14|C1335946;C1367673|||C1367673|HUGO;NCI;OMIM|||  
HS|MAP3K14 Gene|C1367673|||C1367673|NCI|||  
HS|MAP3K14 gene|C1367673|||C1367673|HUGO;MTH|||  
HS|MAP3K14 wt Allele|C1705574|||C1705574|MTH;NCI|||  
HS|MITOGEN-ACTIVATED PROTEIN KINASE KINASE KINASE  
14|C1335946;C1367673|||C1367673|OMIM|||  
HS|Mitogen-Activated Protein Kinase Kinase Kinase 14  
Gene|C1367673|||C1367673|NCI|||  
HS|Mitogen-Activated Protein Kinase Kinase Kinase 14 wt  
Allele|C1705574|||C1705574|NCI|||  
HS|NF-KAPPA-B-INDUCING KINASE|C1367673|||C1367673|OMIM|||  
HS|NIK|||C1367673;C1705574|HUGO;NCI;OMIM|||  
HS|Once a day, at bedtime|C1275563|||C1275563|MTH;SNOMEDCT|||  
HS|Once a day, at bedtime (qualifier value)|||C1275563|SNOMEDCT|||  
HS|SERINE/THREONINE PROTEIN KINASE NIK|C1335946|||C1367673|OMIM|||  
HS|SPH|C2674218|||C2674218|OMIM|||  
HS|SPH1|C1412402;C2674218;C2827376|||C2674218|OMIM|||  
HS|SPHEROCYTOSIS, HEREDITARY, 1|C2674218|||C2674218|OMIM|||  
HS|SPHEROCYTOSIS, TYPE 1|C2674218|||C2674218|OMIM|||  
HS|SPHEROCYTOSIS, TYPE 1 (disorder)|C2674218|||C2674218|MTH|||  
HS|Supernumerary maxillary left primary canine|C1552153|||C1552153|MTH|||  
HS|at bedtime||1|0.964|||||1  
HS|bedtime|C0521112|||C0521112|CHV|1|0.0054|  
HS|bedtimes|C0521112|||C0521112|CHV|||  
HS|haemorrhagic septicaemia|C0086973|||||1|0.0071|  
HS|half strength||1|0.024|||||1  
HS|half-scan|||||||1  
HS|hamstring|C0584895|||C0584895|NCI|||  
HS|hamstring sets|||||||1  
HS|hamstrings|C0584895|||||||1  
HS|hand surgery|C0187067|||||||1  
HS|head sign|||||||1  
HS|head sling|||||||1  
HS|health status|C0018759|||C0018759|AOD;CHV;HL7V3.0;MSH;NCI;SNOMEDCT|1|0.0042|  
HS|healthy smokers|||||1|0.0029|  
HS|healthy subject|C1708335|||||||1  
HS|healthy subjects|C1708335|||||1|0.0468|  
HS|heart size|C0744689|||||||1  
HS|heart sound|C0018820|||C0018820|CHV;CSP;MSH;SNOMEDCT|||  
HS|heart sounds|C0018820|1|0.002|||||1  
HS|heat shock|C0282498|||C0282498|NCI|1|0.0707|  
HS|heat stable|||||||1  
HS|heat stress|C0282507|||C0282507|CHV|1|0.0305|  
HS|heat stroke|C0018843|||||1|0.0038|  
HS|heat-stable|||||||1|0.0079|  
HS|heavy smoker|||||||1  
HS|heel spur|C0158322|||||||1  
HS|heelstick|C0419343|||||||1  
HS|heme synthetase|C0015880;C1414580|||||||1  
HS|hemophagocytic syndrome|C0024291|||C0024291|CHV;MSH;NCI;SNOMEDCT|1|0.0084|  
HS|hemorrhagic septicemia|C0086973|||C0086973|MSH;MTH;NDFRT|||1  
HS|hemorrhagic  
shock|C0036982|||C0036982|AOD;CHV;CSP;LCH;MSH;NCI;NDFRT;SNOMEDCT|1|0.0497|1  
HS|hemorrhagic stroke|C0553692|||C0553692|CHV;DXP;OMIM;SNOMEDCT|1|0.0054|  
HS|hemosorption|C0019063|||C0019063|MSH|1|0.0109|



HS|serine/threonine protein-kinase|C0072402|||C1367673|HUGO|||  
 HSV|Genus Simplexvirus|C0206558|||C0206558|SNOMEDCT|||  
 HSV|Genus Simplexvirus (organism)|||C0206558|SNOMEDCT|||  
 HSV|Genus: Human herpesvirus 1 group|||C0206558|SNOMEDCT|||  
 HSV|HHV|C0206558|||C0206558|NCI|||  
 HSV|HS - Herpes simplex|C0206558|||C0206558|SNOMEDCT|||  
 HSV|HSV|C0206558|||C0206558|AOD;MEDLINEPLUS;NCI;SNOMEDCT|||  
 HSV|HSV - Herpes simplex virus|C0206558|||C0206558|SNOMEDCT|||  
 HSV|Herpes Simplex Virus|C0206558|||C0206558|MSH;NCI|||  
 HSV|Herpes Simplex Viruses|C0206558|||C0206558|MSH|||  
 HSV|Herpes labialis Virus|C0206558|||C0206558|MSH|||  
 HSV|Herpes labialis Viruses|C0206558|||C0206558|MSH|||  
 HSV|Herpes simplex group virus|||C0206558|SNOMEDCT|||  
 HSV|Herpes simplex group virus (organism)|||C0206558|SNOMEDCT|||  
 HSV|Herpes simplex virus|C0206558|||C0206558|LNC;SNOMEDCT|||  
 HSV|Herpes simplex virus group|C0206557|||C0206558|SNOMEDCT|||  
 HSV|Herpes simplex virus group, NOS|C0206557|||C0206558|SNOMEDCT|||  
 HSV|Herpesvirus|C0019369;C0206558|||C0206558|LNC;SNOMEDCT|||  
 HSV|Herpesvirus hominis|C0206558|||C0206558|CSP;MSH|||  
 HSV|Herpesvirus, NOS|C0019369;C0206558|||C0206558|SNOMEDCT|||  
 HSV|Human Herpesvirus 1|C0206558;C0206679|||C0206558|NCI|||  
 HSV|Human herpesvirus 1 group virus|||C0206558|SNOMEDCT|||  
 HSV|Human herpesvirus 1 group virus (organism)|||C0206558|SNOMEDCT|||  
 HSV|Simplexvirus|C0206558|||C0206558|AOD;CSP;MSH;MTH;NCBI;SNOMEDCT|||  
 HSV|Simplexvirus (living organism) (organism)|||C0206558|SNOMEDCT|||  
 HSV|Simplexvirus (living organism) [Ambiguous]|||C0206558|SNOMEDCT|||  
 HSV|Simplexvirus (organism)|||C0206558|SNOMEDCT|||  
 HSV|Simplexvirus, NOS|C0206558|||C0206558|SNOMEDCT|||  
 HSV|Simplexviruses|C0206558|||C0206558|MSH|||  
 HSV|herpe simplex virus|||C0206558|CHV|||  
 HSV|herpes simplex|C0019348|||1|0.0149|  
 HSV|herpes simplex viral|||1|0.005|  
 HSV|herpes simplex  
 virus|C0206558|1|1.000|C0206558|AOD;CHV;CSP;LNC;MSH;NCI;SNOMEDCT|1|0.9355|1  
 HSV|herpes simplex virus type 1|C0206679|||1|0.014|  
 HSV|herpes simplex virus type I|C0206679|||1|0.0024|  
 HSV|herpes simplex viruses|C0206558|||C0206558|CHV|||  
 HSV|herpes virus simplex|C0206558|||C0206558|CHV|||  
 HSV|herpesvirus|C0019369;C0206558|||C0206558|CHV;CSP|||  
 HSV|highly selective vagotomy|C0042273|||C0042273|ICD9CM;MSH;SNOMEDCT|1|0.0194|1  
 HSV|hop stunt viroid|C1000459|||C1000459|NCBI|1|0.0026|  
 HSV|hsv|C0206558|||C0206558|CHV|||  
 HSV|human herpesvirus|C0206558|||C0206558|NCI|||  
 HSV|human herpesvirus 1 group|C0206558|||C0206558|CSP|||  
 HSV|human saphenous vein|||1|0.0062|  
 HSV|hyperviscosity syndrome|C0221030|||1|  
 HSV|labialis herpes virus|C0206558|||C0206558|CHV|||  
 HSV|simplex virus herpes|C0206558|||C0206558|CHV|||  
 HSV|simplexvirus|C0206558|||C0206558|CHV|||  
 I&D|incision and drainage|C0152277|1|1.000|||1|  
 I&D|irrigation and debridement|||1|  
 I&D|irrigation and drainage|||1|  
 IA|(class) IA||1|0.006|||1|  
 IA|(grade) IA||1|0.022|||1|  
 IA|(stage) IA|C0456595;C0457150|1|0.550|||1|  
 IA|(status) IA||1|0.010|||1|  
 IA|(type) IA||1|0.010|||1|

IA|A-current|||||1|0.017|  
IA|A-type K+ current|||||1|0.0116|  
IA|Arterial injection|||C0021487|SNOMEDCT|||  
IA|Arterial injection (procedure)|||C0021487|SNOMEDCT|||  
IA|Class II major histocompatibility complex|||||1|0.0116|  
IA|I region-associated|||||1|0.0178|  
IA|I-ARTER|C0021487|||C0021487|NCI|||  
IA|I-arter|C0021487|||C0021487|NCI|||  
IA|IA|C1947960|||C0021487;C0022037|NCI|||  
IA|INJECT INTRA ARTERIAL|||C0021487|MSH|||  
IA|INJECT INTRAARTERIAL|||C0021487|MSH|||  
IA|INTRA ARTERIAL INJECT|||C0021487|MSH|||  
IA|INTRAARTERIAL INJECT|||C0021487|MSH|||  
IA|Ia|C1947960|||C0444974;C1947960|NCBI;SNOMEDCT|||  
IA|Ia (qualifier value)|||C0444974|SNOMEDCT|||  
IA|Ia <mammal>|C1947960|||C1947960|MTH|||  
IA|Idiopathic anaphylaxis|C0413235|||||1|0.0124|  
IA|Induced abortion|C0392535;C1704300|||||1|0.0062|  
IA|Injection, Intra-Arterial|C0021487|||C0021487|MSH|||  
IA|Injection, Intraarterial|C0021487|||C0021487|MSH|||  
IA|Injection, intraarterial|C0021487|||C0021487|HL7V3.0|||  
IA|Injections, Intra Arterial|C0021487|||C0021487|MSH|||  
IA|Injections, Intra-Arterial|C0021487|||C0021487|MSH|||  
IA|Injections, Intra-arterial|C0021487|||C0021487|LCH|||  
IA|Injections, Intraarterial|C0021487|||C0021487|MSH|||  
IA|Insulin antibodies|C0021644|||||1|0.0155|  
IA|Intestinal atresia|C0021828|||||1|0.0077|  
IA|Intra Arterial Injections|C0021487|||C0021487|MSH|||  
IA|Intra-Arterial Injection|C0021487|||C0021487|MSH|||  
IA|Intra-Arterial Injections|C0021487|||C0021487|MSH;MTH|||  
IA|Intra-arterial injection|C0021487|||C0021487|SNOMEDCT|||  
IA|Intra-arterial injection (procedure)|||C0021487|SNOMEDCT|||  
IA|Intra-articular|C0442108|||||1|0.0201|  
IA|Intraarterial|C0694634|||||1|0.0503|  
IA|Intraarterial Injection|C0021487|||C0021487|MSH;NCI|||  
IA|Intraarterial Injections|C0021487|||C0021487|MSH|||  
IA|Iowa|C0022037;C1555231|1|0.038|C0022037|AOD;CHV;LCH;MSH;MTH;NCI;SNOMEDCT|||  
IA|Iowa (geographic location)|||C0022037|SNOMEDCT|||  
IA|Serotype Ia|C0444974|||C0444974|SNOMEDCT|||  
IA|Serotype Ia (qualifier value)|||C0444974|SNOMEDCT|||  
IA|activity|C0026606;C0205177;C0439167;C0441655;C1561536|||||1|0.017|  
IA|arterial|C0003842;C0221464|||||1|0.0077|  
IA|artery|C0003842;C0226004|||||1|0.017|  
IA|class II MHC|C0017349|||||1|0.0217|  
IA|class II antigen|C0019630|||||1|0.017|  
IA|class II molecules|||||1|0.0085|  
IA|component|C0449432;C1179435;C1705248|||||1|0.0077|  
IA|ibotenic acid|C0020738|||C0020738|MSH;NDFRT;SNOMEDCT|1|0.0232|1|  
IA|ideational apraxia|C0234526|||||1|  
IA|idiopathic anaphylaxis|C0413235|||C0413235|CHV;SNOMEDCT|||1|  
IA|image amplification|||||1|  
IA|image analysis|C0200765|||C0200765|NCI;SNOMEDCT|1|0.0356|  
IA|immune -associated antigen|||||1|  
IA|immune adherence|C0301893|||C0301893|SNOMEDCT|1|0.0162|1|  
IA|immune-associated|||||1|0.0077|  
IA|immunoadsorption|||||1|0.0433|  
IA|immunoassay|C0020980;C0021060|||||1|0.007|

IA|immunobiologic activity|||||||1  
IA|impedance angle|||||||1  
IA|imperforate anus|C0003466|||||||1  
IA|inactive alcoholic|||||||1  
IA|incidental appendectomy|C0192882|||||||1  
IA|incisors absent|||||||1|0.0062|  
IA|incurred accidentally|||||||1  
IA|indocyanine green angiography|C0430879|||||||1|0.017|  
IA|indolaminergic-accumulating|||||||1  
IA|indulin agar|||||||1  
IA|infantile apnea|C0745261|||||||1  
IA|infantile autism|C0004352|||C0004352|AOD;CHV;MSH;SNOMEDCT|1|0.0077|1  
IA|infarct area|||||||1|0.0085|  
IA|infected area|||||||1  
IA|inferior angle|||||||1  
IA|inferior apical|||||||1  
IA|inflammatory arthritis|C0003864|||||||1|0.0124|  
IA|infrequent asthma|||||||1  
IA|inhibitory antigen|||||||1  
IA|inhibitory avoidance|||||||1|0.0193|  
IA|injected intra-arterially|||||||1|0.007|  
IA|innominate artery|C0006094|||||||1|0.0054|  
IA|insulin|C0021641;C1533581;C1579433|||||||1|0.0085|  
IA|interarytenoid|||||||1|0.0101|  
IA|interbronchial angle|||||||1  
IA|internal auditory|||||||1  
IA|intestinal amebiasis|C0013370;C0860230|||C0013370|CHV;MSH;NDFRT|||  
IA|intestinal atresia|C0021828|||C0021828|CHV;MSH;MTH;NCI;NDFRT|||  
IA|intimal area|||||||1|0.0116|  
IA|intra arterial injection|C0021487|||C0021487|CHV|||  
IA|intra-abdominal|C1512910|||||||1|0.0093|  
IA|intra-amniotic|C1512912|||C1512912|NCI|||  
IA|intra-arterial|C0694634|||||||1|0.1608|  
IA|intra-arterial injection|C0021487|||C0021487|AOD|||  
IA|intra-arterial injections|C0021487|||C0021487|CHV|||  
IA|intra-arterially|||||||1|0.0124|  
IA|intra-  
articular|C0442108|||C0205528;C0442108;C1522204|CHV;MTH;NCI;SNOMEDCT|1|0.0278|  
IA|intraalveolar|||||||1  
IA|intraamniotic|C1512912|||||||1  
IA|intraaortic|||||||1  
IA|intraarterial|C0694634|1|0.352|||1|0.0518|1  
IA|intraarterial injections|C0021487|||C0021487|CHV|||  
IA|intraarterially|||||||1|0.0209|  
IA|intraarticular|C0442108|||||||1|0.0341|1  
IA|intraatrial|||||||1  
IA|intraauricular|||||||1  
IA|intracranial aneurysm|C0007766|||||||1|0.0124|  
IA|invasive aspergillosis|C0238013|||||||1|0.0897|1  
IA|iodoacetamide|C0021973|||||||1|0.0155|  
IA|irradiation area|||||||1  
IA|isonicotinic acid|C0022210|||||||1  
IA|isopropyl  
alcohol|C0022237|||C0022237|AOD;CHV;MSH;MTH;MTHSPL;NCI;NDFRT;RXNORM;SNOMEDCT;VAN  
DF|||1  
IA|la serotype|C0444974|||C0444974|MTH|||  
IA|osteopetrotic|||||||1|0.0124|

IA|transient K+ current|||||1|0.0139|  
IA|transient outward current|||||1|0.0139|  
IA|transient potassium current|||||1|0.0116|  
IB|(cycle) IB||1|0.004|||||  
IB|(grade) IB||1|0.016|||||  
IB|(stage) IB|C0456597;C0457152|1|0.944|||||  
IB|(status) IB||1|0.016|||||  
IB|(type) IB||1|0.004|||||  
IB|ATP||||C1366832;C1705556|NCI|||  
IB|ATP8A2||||C1366832|NCI|||  
IB|ATP8A2 wt Allele|C1705556|||C1705556|MTH;NCI|||  
IB|ATPIB||||C1366832;C1705556|NCI|||  
IB|ATPase, Aminophospholipid Transporter-Like, Class I, Type 8A, Member 2|C1366832|||C1366832|MTH;NCI|||  
IB|ATPase, Aminophospholipid Transporter-Like, Class I, Type 8A, Member 2 wt Allele|C1705556|||C1705556|NCI|||  
IB|DKFZP434B1913|C1366832;C1705556|||C1366832;C1705556|NCI|||  
IB|IB|C0020985|||C0020985;C1366832;C1705556|LNC;NCI|||  
IB|IMMUNOBLOT|C0020985|||C0020985|MSH|||  
IB|Ib|C0020985|||C0444976|SNOMEDCT|||  
IB|Ib (qualifier value)|||C0444976|SNOMEDCT|||  
IB|Ib serotype|C0444976|||C0444976|MTH|||  
IB|Immunoblot|C0020985|||C0020985|NCI|1|0.1373|  
IB|Immunoblot Analysis|C0020985|||C0020985|NCI|||  
IB|Immunoblot Assay|C0020985|||C0020985|NCI|||  
IB|Immunoblot assay|C0020985|||C0020985|SNOMEDCT|||  
IB|Immunoblot assay (procedure)|||C0020985|SNOMEDCT|||  
IB|Immunoblot assay, NOS|C0020985|||C0020985|SNOMEDCT|||  
IB|Immunoblotting|C0020985|||C0020985|MSH;MTH;SNOMEDCT|||  
IB|Immunoblotting (qualifier value)|||C0020985|SNOMEDCT|||  
IB|Immunoblottings|C0020985|||C0020985|MSH|||  
IB|ML-1||||C1366832;C1705556|NCI|||  
IB|ML-1 Protein|C1366832|||C1366832|NCI|||  
IB|Serotype Ib|C0444976|||C0444976|SNOMEDCT|||  
IB|Serotype Ib (qualifier value)|||C0444976|SNOMEDCT|||  
IB|assays immunoblot|C0020985|||C0020985|CHV|||  
IB|binding|C0243122;C1145667;C1167622|||||1|0.0423|  
IB|ibuprofen|C0020740|||||1|0.1373|  
IB|idiopathic blepharospasm|||||||1|  
IB|ileal bypass|C0399975|||||||1|  
IB|immune balance|||||||1|  
IB|immune body|||||||1|  
IB|immunoblot|C0020985|||C0020985|CHV|||  
IB|immunoblot assay|C0020985|||C0020985|CHV|||  
IB|immunoblotting|C0020985|||C0020985|AOD;CHV;CSP|||  
IB|inclusion bodies|C0007637|||||1|0.0563|  
IB|inclusion body|C0007637|||C0007637|CHV;CSP;GO;MSH|||1|  
IB|index of body build|||||||1|  
IB|infantile botulism|C0238027|||||||1|  
IB|infectious bronchitis|||||1|0.1549|1|  
IB|inferior basal|||||||1|  
IB|insulin receptor binding test|||||||1|  
IB|integrated backscatter|||||1|0.1585|  
IB|interferon beta|C0015980;C0751599;C2825876|1|0.002|||||  
IB|international baccalaureate||1|0.010|||||  
IB|intrinsic bursting|||||1|0.0352|  
IB|intrinsically bursting|||||1|0.0563|

IB|ipratropium  
bromide|C0700580|||C0700580|CHV;MSH;MTHSPL;NCI;NDFRT;RXNORM;SNOMEDCT;USPMG;VANDF  
|1|0.2218|  
IB|irradiated bone|C0022098|||1  
IB|isolation bed|||1  
IB|serotype Ib|C0444976|||C0444976|CHV|||  
ICA|Antibody to islet cells of pancreas  
measurement|C0201519|||C0201519|MTH;SNOMEDCT|||  
ICA|Antibody to islet cells of pancreas measurement  
(procedure)|||C0201519|SNOMEDCT|||  
ICA|Ca2+ channels|||1|0.0027|  
ICA|Ca2+ currents|||1|0.0384|  
ICA|ICA|C0201519|||C0201519|LNC;SNOMEDCT|||  
ICA|Immunocytochemical assay|||1|0.0097|  
ICA|Independent component analysis|||1|0.0769|  
ICA|Islet cell antibody measurement|C0201519|||C0201519|SNOMEDCT|||  
ICA|Islet cell cytoplasm antibody|C0201519|||C0201519|SNOMEDCT|||  
ICA|L-type Ca2+ current|||1|0.0349|  
ICA|L-type calcium current|||1|0.0198|  
ICA|arthritis|C0003864|||1|0.0047|  
ICA|calcium currents|||1|0.0326|  
ICA|icariin|C0063273|||C0063273|MSH|||  
ICA|ileocolic anastomosis|C0192751|||1  
ICA|immunocytochemical assay|||1  
ICA|intercellular adhesion|||1|0.0035|  
ICA|intercountry adoption|C0175800|||1  
ICA|intermediate care area|||1  
ICA|internal carotid|C0741978|||1|0.0113|  
ICA|internal carotid  
artery|C0007276|1|1.000|C0007276|CHV;FMA;LNC;MSH;NCI;SNOMEDCT;UWDA|1|0.5606|1  
ICA|intracranial abscess|C0021874|||1  
ICA|intracranial anatomy|||1  
ICA|intracranial  
aneurysm|C0007766|||C0007766|CHV;CSP;CST;MEDLINEPLUS;MSH;NCI;NDFRT;OMIM;SNOMEDCT  
|||1  
ICA|inward calcium current|||1|0.0159|  
ICA|ionized Ca|||1|0.0039|  
ICA|ionized calcium|C0201927;C0373561;C0596235|||1|0.0268|1  
ICA|iridocorneal angle|C0229238|||C0229238|FMA;SNOMEDCT;UWDA|||  
ICA|islet cell antibodies|||1|0.1378|  
ICA|islet cell antibody|C0063900|||C0063900|CHV;MSH;MTH;SNOMEDCT|||1  
ICA|islet cell antibody (ICAb) test|||C0201519|CHV|||  
ICA|islet cell antigen|||1  
ICA|islet cell autoantibodies|||1|0.007|  
ICA|islet cells|C0022131|||1|0.0136|  
ICD|Between Lunch and Dinner|C1550747|||C1550747|NCI|||  
ICD|Cardioverter Defibrillators, Implantable|C0162589|||C0162589|MSH|||  
ICD|Cardioverter-Defibrillator, Implantable|C0162589|||C0162589|MSH|||  
ICD|Cardioverter-Defibrillators, Implantable|C0162589|||C0162589|MSH|||  
ICD|Cell Disease, Inclusion|C0020725|||C0020725|MSH|||  
ICD|Cell Diseases, Inclusion|C0020725|||C0020725|MSH|||  
ICD|Defibrillator, Implantable|C0162589|||C0162589|MSH|||  
ICD|Defibrillators, Implantable|C0162589|||C0162589|MEDLINEPLUS;MSH|||  
ICD|Deficiency of N-acetylglucosamine-1-  
phosphotransferase|C0020725|||C0020725|OMIM|||  
ICD|Disease, I-Cell|C0020725|||C0020725|MSH|||  
ICD|Disease, Inclusion Cell|C0020725|||C0020725|MSH|||

ICD|Diseases, I-Cell|C0020725|||C0020725|MSH|||  
ICD|Diseases, Inclusion Cell|C0020725|||C0020725|MSH|||  
ICD|I CELL DIS|||C0020725|MSH|||  
ICD|I Cell Disease|C0020725|||C0020725|MSH|||  
ICD|I cell disease|C0020725|||C0020725|CSP;MTHICD9|||  
ICD|I-CELL DISEASE|C0020725|||C0020725|OMIM|||  
ICD|I-Cell Disease|C0020725|||C0020725|MSH;NCI|||  
ICD|I-Cell Diseases|C0020725|||C0020725|MSH|||  
ICD|I-cell - Inclusion cell disease|C0020725|||C0020725|SNOMEDCT|||  
ICD|I-cell disease|C0020725|||C0020725|SNOMEDCT|1|0.0146|1  
ICD|I-cell disease (disorder)|||C0020725|SNOMEDCT|||  
ICD|ICD|C0020725;C0162589;C0870733;C1550747|||C0020725;C0162589;C0870733;C1550747|HL7V3.0;LNC;NCI;OMIM|||  
ICD|INCLUSION CELL DIS|||C0020725|MSH|||  
ICD|INCLUSION CELL DISEASE|C0020725|||C0020725|DXP|||  
ICD|INTERNATIONAL CLASS DIS|||C0870733|MSH|||  
ICD|INTERNATIONAL STATIS CLASS DIS RELAT HEALTH PROBLEMS|||C0870733|MSH|||  
ICD|Implantable Cardioverter Defibrillators|C0162589|||C0162589|MSH|||  
ICD|Implantable Cardioverter-Defibrillator|C0162589|||C0162589|MSH|||  
ICD|Implantable Cardioverter-Defibrillators|C0162589|||C0162589|MSH|||  
ICD|Implantable Cardioverter-defibrillator|C0162589|||C0162589|NCI|||  
ICD|Implantable Defibrillator|C0162589|||C0162589|MSH|||  
ICD|Implantable Defibrillators|C0162589|||C0162589|MEDLINEPLUS;MSH|||  
ICD|Implantable defibrillator|C0162589|||C0162589|MTH;SNOMEDCT|||  
ICD|Implantable defibrillator, device|C0162589|||C0162589|SNOMEDCT|||  
ICD|Implantable defibrillator, device (physical object)|||C0162589|SNOMEDCT|||  
ICD|Inclusion Cell Disease|C0020725|||C0020725|MSH|||  
ICD|Inclusion Cell Diseases|C0020725|||C0020725|MSH|||  
ICD|Inclusion-cell Disease|C0020725|||C0020725|NCI|||  
ICD|International Classification of Diseases|C0870733|||C0870733|MSH;MTH;NCI|||1  
ICD|International Statistical Classification of Diseases and Related Health Problems|||C0870733|MSH|||  
ICD|Inventory for Counseling and Development|||1  
ICD|LEROY DISEASE|C0020725|||C0020725|DXP|||  
ICD|ML II|C0020725;C0066972|||C0020725|OMIM|||  
ICD|MUCOLIPIDOSIS II|C0020725|||C0020725|DXP;OMIM|||  
ICD|Mucolipidoses, Type II|C0020725|||C0020725|MSH|||  
ICD|Mucolipidosis II|C0020725|||C0020725|MSH;MTHICD9;SNOMEDCT|||  
ICD|Mucolipidosis IIs|C0020725|||C0020725|MSH|||  
ICD|Mucolipidosis Type II|C0020725|||C0020725|MSH;NCI|||  
ICD|Mucolipidosis Type IIs|C0020725|||C0020725|MSH|||  
ICD|Mucolipidosis type II|C0020725|||C0020725|SNOMEDCT|||  
ICD|Mucolipidosis, Type II|C0020725|||C0020725|MSH|||  
ICD|N-Acetylglucosamine-1-phosphotransferase deficiency|C0020725|||C0020725|SNOMEDCT|||  
ICD|N-Acetylglucosamine-1-phosphotransferase deficiency (disorder)|||C0020725|SNOMEDCT|||  
ICD|N-acetylglucosamine-1-phosphotransferase deficiency|C0020725|||C0020725|SNOMEDCT|||  
ICD|Type II Mucolipidoses|C0020725|||C0020725|MSH|||  
ICD|Type II Mucolipidosis|C0020725|||C0020725|MSH;MTH|||  
ICD|automatic defibrillator|C0162589|||C0162589|CHV|||  
ICD|automatic defibrillators|C0162589|||C0162589|CHV|||  
ICD|between lunch and dinner|C1550747|||C1550747|MTH|||  
ICD|cell disease i|C0020725|||C0020725|CHV|||  
ICD|cell disease i cell inclusion|C0020725|||C0020725|CHV|||  
ICD|defibrillator implantable|||C0162589|CHV|||

ICD|i cell disease|C0020725|||C0020725|CHV|||  
ICD|i-cell disease|C0020725|||C0020725|CHV|||  
ICD|icd|C0020725;C0162589;C0870733;C1550747|||C0870733|CHV|||  
ICD|icds|C0162589|||C0162589|CHV|||  
ICD|idiopathic cerebral dysfunction|||1  
ICD|idiopathic cervical dystonia|||1|0.009|  
ICD|immune complex disease|C0020951|||C0020951|CHV;CSP;MSH|||1  
ICD|immune complex dissociation|||1|0.0106|1  
ICD|immune complex-dissociated|||1|0.0155|  
ICD|implantable cardioverter defibrillator|C0162589|||1|0.6737|  
ICD|implantable cardioverter-defibrillator|C0162589|1|1.000|C0162589|MSH;NCI|||1  
ICD|implantable defibrillator|C0162589|||C0162589|CHV;CSP|||  
ICD|implantable defibrillators|C0162589|||C0162589|CHV|||  
ICD|impulse control disorder|C0021122|||C0021122|AOD;CHV;SNOMEDCT|||1  
ICD|inclusion cell disease|C0020725|||C0020725|CHV;DXP;MSH|||1  
ICD|indigocarmine dye|||1  
ICD|induced circular dichroism|||1|0.0195|1  
ICD|informed consent document|C0009797|||1  
ICD|initial claudication distance|||1|0.0179|  
ICD|initial consonant deletion|||1  
ICD|inner canthal distance|||1  
ICD|instantaneous cardiac death|||1  
ICD|intercanthal distance|C1720475|||C1720475|SNOMEDCT|||1  
ICD|intercapillary distance|||1|0.0081|  
ICD|internal cardioverter-defibrillator|||1  
ICD|internal cervical device|||1  
ICD|internal defibrillator|C0162589|||C0162589|CHV|||  
ICD|internal defibrillators|C0162589|||C0162589|CHV|||  
ICD|international Classification of Diseases|C0870733|||1|0.1383|  
ICD|international classification of diseases (ICD)|C0870733|||C0870733|CHV|||  
ICD|intracardiac defibrillator|||1  
ICD|intracellular domain|||1|0.026|  
ICD|intracervical device|||1  
ICD|intrauterine contraceptive device|C0021900|||C0021900|MSH;NCI;SNOMEDCT|||1  
ICD|irritant contact dermatitis|C0162823|||C0162823|CHV;NCI;SNOMEDCT|1|0.0423|1  
ICD|ischemic coronary disease|||1  
ICD|isocitrate  
dehydrogenase|C0022157|||C0022157|CSP;LNC;MSH;NDFRT;SNOMEDCT|1|0.0244|1  
ICD|isolated conduction defect|||1  
ICD|mucopolipidosis II|C0020725|||C0020725|CSP|||  
ICD|mucopolipidosis ii|C0020725|||C0020725|CHV|||  
ICD|mucopolipidosis type ii|C0020725|||C0020725|CHV|||  
ID|(drug) ID||1|0.002|||1  
ID|DL|||C1522475|NCI|||  
ID|Descriptor|C0282354;C0600091;C0678257|||C0600091|NCI|||  
ID|Designation|C0600091;C1510813|||C0600091|NCI|||  
ID|Designator|C0600091|||C0600091|NCI|||  
ID|East Indies|C0021247|||C0021247|MSH|||  
ID|I-DERMAL|||C1522475|NCI|||  
ID|I-dermal|||C1522475|NCI|||  
ID|IC|C0587121|||C1522475|NCI|||  
ID|ID|C0020786;C0600091;C2986768|||C0020787;C0021247;C0150647;C0600091;C1522475;  
C2349049;C2986768|LNC;NCI;SNOMEDCT|||  
ID|IDN|C0021247|||C0021247|NCI|||  
ID|INDONESIA|C0021247;C2987743|||C0021247|NCI|||  
ID|INTRADERMAL|C0150647|||C1522475|NCI|||  
ID|Id|C0020786;C0600091;C2986768|||C0020786|MSH|||

ID|Id Personality Component|C0020786|||C0020786|MTH|||  
ID|Idaho|C0020787|||C0020787|AOD;LCH;MSH;NCI;SNOMEDCT|||  
ID|Idaho (geographic location)|C0020787|||C0020787|MTH;SNOMEDCT|||  
ID|Identifier|C0600091;C1554104;C1554159|||C0600091|LNC;MTH;NCI;SNOMEDCT|||  
ID|Identifier (property)|||C0600091|SNOMEDCT|||  
ID|Identifier (property) (qualifier value)|||C0600091|SNOMEDCT|||  
ID|Ids|||C0020786|MSH|||  
ID|Indonesia|C0021247;C2987743|||C0021247|AOD;CSP;LCH;MSH;MTH;NCI;SNOMEDCT|||  
ID|Indonesia (geographic location)|||C0021247|SNOMEDCT|||  
ID|Injected Dose|C2986768|||C2986768|MTH;NCI|||  
ID|Intracutaneous|C1522475|||C1522475|NCI|||  
ID|Intracutaneous route|C0205524;C1522475|||C1522475|SNOMEDCT|||  
ID|Intracutaneous route (qualifier value)|||C1522475|SNOMEDCT|||  
ID|Intracutaneous use|C1522475|||C1522475|SNOMEDCT|||  
ID|Intradermal|C0150647|||C0150647;C1522475|HL7V2.5;NCI;SNOMEDCT|||  
ID|Intradermal Injection|C0021489;C1522475|||C1522475|NCI|||  
ID|Intradermal Route of Administration|C1522475|||C1522475|NCI|||  
ID|Intradermal Route of Drug Administration|C1522475|||C1522475|MTH|||  
ID|Intradermal route|C1522475|||C1522475|SNOMEDCT|||  
ID|Intradermal route (qualifier value)|||C1522475|SNOMEDCT|||  
ID|Intradermal use|C1522475|||C1522475|SNOMEDCT|||  
ID|Intradermal use (qualifier value)|||C1522475|SNOMEDCT|||  
ID|IntradermalRoute|C1522475|||C1522475|HL7V3.0|||  
ID|Malay Archipelago|C0021247|||C0021247|MSH|||  
ID|Netherlands East Indies|C0021247|||C0021247|MSH|||  
ID|Unit of Infective Dose|C2349049|||C2349049|MTH;NCI|||  
ID|anti-idiotypic|||1|0.0207|  
ID|anti-idiotypic|||1|0.0182|  
ID|given either iv or intraduodenally|||1|0.0024|  
ID|id|C0020786;C0600091;C2986768|||C0020786;C0600091|AOD;CHV|||  
ID|idaho|C0020787|||C0020787|CHV|||  
ID|identification|C0020792;C0205396|1|0.002|C0020792;C0205396|LCH;LNC;MSH;MTH;NCI|1|0.0188|1|  
ID|identifier|C0600091;C1554104;C1554159|||C0600091;C1554104;C1554159|CHV;HL7V3.0;LNC;MTH;NCI;SNOMEDCT|1|0.0146|  
ID|identifiers|C0600091|||C0600091|CHV|||  
ID|identify|||1|  
ID|idiotopes|||1|0.0164|  
ID|idiotype|C0021013|||C0021013|CHV;NCI;SNOMEDCT|1|0.1118|1|  
ID|idiotypic|||1|0.0213|1|  
ID|iditol dehydrogenase|C0020809|||1|  
ID|ill-defined|||1|  
ID|immune deficiency|C0850497|||C0850497|CHV|||1|  
ID|immunodeficiency|C0021051|||C0021051|AOD;CHV;CSP;NCI;OMIM;SNOMEDCT|||  
ID|immunodiffusion|C0017231|||C0017231|CHV;CSP;MSH;SNOMEDCT|1|0.0705|1|  
ID|immunoglobulin deficiency|C0745242|||1|  
ID|inappropriate disability|||1|  
ID|incapacitating dose|||1|  
ID|incidence density|||1|0.0115|  
ID|incision and drainage|C0152277|1|0.002|||1|  
ID|inclusion disease|C0010823|||1|  
ID|index of difficulty|||1|0.0049|  
ID|index of discrimination|||1|  
ID|individual dose|||1|  
ID|indomethacin|C0021246|||1|0.0097|  
ID|indonesia|C0021247;C2987743|||C0021247|CHV|||  
ID|induction delivery|||1|



IM|At risk for impaired home maintenance management|C0231377|||C0231377|MTH;SNOMEDCT|||  
IM|At risk for impaired home maintenance management (finding)|||C0231377|SNOMEDCT|||  
IM|IM|||C0021492;C0022132;C0442117;C1522005|MSH;NCI|||  
IM|IM - Intramuscular|||C0442117|SNOMEDCT|||  
IM|IM - Intramuscular injection|C0021492|||C0021492|SNOMEDCT|||  
IM|IM injection|C0021492|||C0021492|AOD|||  
IM|IMI - Intramuscular injection|C0021492|||C0021492|SNOMEDCT|||  
IM|IMMUNOL|C1517844|||C1522005|MSH|||  
IM|IMN|C0022132|||C0022132|NCI|||  
IM|INJECT INTRAMUSCULAR|||C0021492|MSH|||  
IM|INTRAMUSCULAR|C0021492;C0442117|||C0021492|NCI|||  
IM|INTRAMUSCULAR INJECT|||C0021492|MSH|||  
IM|ISLE OF MAN|C0022132|||C0022132|NCI|||  
IM|Im|||C0231377|SNOMEDCT|||  
IM|Impaired home maintenance management, potential|C0231377|||C0231377|SNOMEDCT|||  
IM|Index Medicus|C0021194|||1  
IM|Indomethacin|C0021246|||1|0.0646|  
IM|Induced motion|||1|0.0041|  
IM|Infant mortality|C0021278|||1|0.0059|  
IM|Injection, Intramuscular|C0021492|||C0021492|MSH|||  
IM|Injection, intramuscular|C0021492|||C0021492|HL7V3.0|||  
IM|Injections, Intramuscular|C0021492|||C0021492|LCH;MSH|||  
IM|Intramuscular|C0021492;C0442117|||C0442117|MTH;NCI;SNOMEDCT|||  
IM|Intramuscular (qualifier value)|||C0442117|SNOMEDCT|||  
IM|Intramuscular Injection|C0021492|||C0021492|MSH;NCI|||  
IM|Intramuscular Injections|C0021492|||C0021492|MSH|||  
IM|Intramuscular Route of Administration|C0021492|||C0021492|NCI|||  
IM|Intramuscular drug therapy|||C0021492|SNOMEDCT|||  
IM|Intramuscular injection|C0021492|||C0021492|MTH;SNOMEDCT|||  
IM|Intramuscular injection (procedure)|||C0021492|SNOMEDCT|||  
IM|Intramuscular injection NOS|C0021492|||C0021492|SNOMEDCT|||  
IM|Intramuscular injection NOS (procedure)|||C0021492|SNOMEDCT|||  
IM|Isle of Man|C0022132|||C0022132|MSH;MTH;NCI;SNOMEDCT|||  
IM|Isle of Man (geographic location)|||C0022132|SNOMEDCT|||  
IM|M-current|||1|0.0164|  
IM|administered intramuscularly|||1|0.01|  
IM|at risk for impaired home maintenance management|C0231377|||C0231377|CHV|||  
IM|current|C0521116;C1705970|||1|0.0127|  
IM|ice massage|C0695940|||1  
IM|idiopathic myelofibrosis|C0001815|||C0001815|CHV;NCI;PDQ|1|0.0164|1  
IM|im injection|C0021492|||C0021492|CHV|||  
IM|im injections|C0021492|||C0021492|CHV|||  
IM|imatinib|C0935989|||C0935989|CHV;MSH;NCI;NDFRT;RXNORM;SNOMEDCT;USPMG;VANDF|||  
IM|imatinib mesylate|C0939537|||C0939537|CHV;LNC;MSH;MTH;MTHSPL;NCI;NDFRT;PDQ;RXNORM;SNOMEDCT;USPMG;VANDF|1|0.0068|  
IM|imidazole|C0020923;C0020924|||C0020923;C0020924|CHV;CSP;LCH;MSH;MTH;SNOMEDCT|1|0.0164|  
IM|imipramine|C0020934|||C0020934;C0020935|AOD;CHV;CSP;LCH;LNC;MSH;MTH;NCI;NDFRT;RXNORM;SNOMEDCT;USPMG;VANDF|||  
IM|immature|C0205252|||C0205252|CHV;LNC;NCI;SNOMEDCT|||  
IM|immobilization|C0020944|||C0020944|CHV;LNC;MSH;SNOMEDCT|1|0.0086|  
IM|immunology|C0152036;C1522005|||C1522005|MSH|||  
IM|immunology aspects|C1522005|||C1522005|MTH|||

IM|immunosuppression method|||||||1  
IM|impaired mentation|||||||1  
IM|indomethacin|C0021246|||C0021246|AOD;CHV;CSP;LCH;LNC;MSH;MTH;MTHFDA;MTHSPL;NCI;NDFRT;PDQ;RXNORM;SNOMEDCT;USPMG;VANDF|||  
IM|industrial medicine|C0028802|||||||1  
IM|infant mortality|C0021278|||C0021278|AOD;CHV;CSP;MSH;NCI|||  
IM|infantile myofibromatosis|C0432284|||C0432284|MTH;SNOMEDCT|1|0.0091|  
IM|infection medium|||||||1  
IM|infectious  
mononucleosis|C0021345|||C0021345|AIR;AOD;CHV;COSTAR;DXP;ICD9CM;ICPC;MEDLINEPLUS;MSH;MTH;NCI;NDFRT;QMR;SNOMEDCT|1|0.1966|1  
IM|inflammatory myopathy|C0027121|||C0027121|CHV;MSH;NDFRT;SNOMEDCT|1|0.0041|  
IM|inner medulla|||||||1|0.0141|  
IM|inner medullary|||||||1|0.0055|  
IM|inner membrane|||||||1|0.0123|1  
IM|innocent murmur|C0232255|||||||1  
IM|inspiratory muscle|||||||1  
IM|integrative medicine|C2350258|||C2350258|MEDLINEPLUS;MSH|||  
IM|intermediate|C0205103;C1550465;C2827755|||||||1|0.0077|  
IM|intermediate megaloblast|||||||1  
IM|intermediate mesoderm|C1284010|||C1284010|MSH;NCI;SNOMEDCT|||  
IM|intermetatarsal|||||||1|0.0064|1  
IM|intermuscular|||||||1  
IM|internal malleolus|||||||1  
IM|internal mammary|||||||1|0.0082|1  
IM|internal margin|||||||1  
IM|internal  
medicine|C0021782;C1555750|||C0021782;C1555750|CHV;HL7V3.0;LCH;MSH;NCI;SNOMEDCT|1|0.0218|1  
IM|internal monitor|||||||1  
IM|interstitial macrophages|||||||1|0.0064|  
IM|interval mapping|||||||1|0.0023|  
IM|intestinal malrotation|C0221210;C2749839|||||||1  
IM|intestinal mesenchyme|||||||1  
IM|intestinal metaplasia|C0334037|||C0334037|CHV;NCI;SNOMEDCT|1|0.122|1  
IM|intima-media|||||||1|0.0064|  
IM|intracellular macroadenoma|||||||1  
IM|intracellular membrane|C0021868|||C0021868|CSP;FMA;MSH;NCI|||  
IM|intracellular membranes|C0021868|||||||1|0.0023|  
IM|intrahepatic metastasis|||||||1|0.0096|  
IM|intramedullary|C1512957;C2732619|1|0.076|C1512957;C2732619|NCI;SNOMEDCT|1|0.0296|1  
IM|intramembranous|||||||1|0.0046|  
IM|intramuscular|C0021492;C0442117|1|0.922|C0021492;C0442117;C1556154|CHV;HL7V2.5;MTH;NCI;SNOMEDCT|1|0.2258|1  
IM|intramuscular (IM) injections|C0021492|||C0021492|CHV|||  
IM|intramuscular  
injection|C0021492|||C0021492|AOD;CHV;CSP;MSH;MTH;NCI;SNOMEDCT|1|0.0059|  
IM|intramuscular injections|C0021492|||C0021492|CHV|||  
IM|intramuscularly|||||||1|0.1224|  
IM|invasive mole|C0008493|||C0008493|CHV;MSH;MTHICD9;NCI;NDFRT;PDQ;SNOMEDCT|||1  
IM|ionomycin|C0022020|||C0022020|CSP;MSH;NCI;NDFRT;PDQ;SNOMEDCT|1|0.0041|  
IM|irsogladine maleate|C0091573|||C0091573|MSH|||  
IM|myocardial infarction|C0027051;C2926063|||||||1|0.005|  
INH|4-Pyridinecarboxylic acid, hydrazide|C0022209|||C0022209|MSH;NDFRT|||  
INH|By inhalation|C0205535|||C0205535|SNOMEDCT|||  
INH|By inhalation (route)|||C0205535|SNOMEDCT|||

INH|By inhalation (route) (qualifier value)|||C0205535|SNOMEDCT|||  
INH|Hydrazide, Isonicotinic Acid|C0022209|||C0022209|MSH|||  
INH|INA - Isoniazid|C0022209|||C0022209|SNOMEDCT|||  
INH|INAH - Isoniazid|C0022209|||C0022209|SNOMEDCT|||  
INH|INH|||C0022209;C0205535;C1705211|CSP;NCI;PDQ;SNOMEDCT|||  
INH|INHALANT|C0001559;C0598322|||C0598322|NCI|||  
INH|INHALATION|C0004048;C0205535;C1705211|||C1705211|NCI|||  
INH|ISONIAZID|C0022209|||C0022209|MTHSPL;NCI;NDFRT;VANDF|||  
INH|Inh|||C0598322|NCI|||  
INH|Inhalant|C0001559;C0598322|||C0598322|HL7V3.0;NCI;NDFRT;RXNORM|||  
INH|Inhalant Dosage Form|C0598322|||C0598322|NCI|||  
INH|Inhalant Dose Form|C0598322|||C0598322|NCI|||  
INH|Inhalant [Dose Form]|C0598322|||C0598322|NDFRT|||  
INH|Inhalant dose form|C0598322|||C0598322|MTH|||  
INH|Inhalation|C0004048;C0205535;C1705211|||C0205535;C1705211|HL7V2.5;HL7V3.0;NCI;SNOMEDCT|||  
INH|Inhalation - unit of product usage|C1705211|||C1705211|SNOMEDCT|||  
INH|Inhalation - unit of product usage (qualifier value)|||C1705211|SNOMEDCT|||  
INH|Inhalation Dosing Unit|C1705211|||C1705211|MTH;NCI|||  
INH|Inhalation Route of Administration|C0205535|||C0205535|NCI|||  
INH|Inhalation Route of Drug Administration|C0205535|||C0205535|MTH|||  
INH|Isoniazid|C0022209|||C0022209|LCH;LNC;MSH;MTHSPL;NCI;NDFRT;SNOMEDCT;USPMG|||  
INH|Isoniazid (product)|||C0022209|SNOMEDCT|||  
INH|Isoniazid (substance)|||C0022209|SNOMEDCT|||  
INH|Isoniazid [Chemical/Ingredient]|||C0022209|NDFRT|||  
INH|Isonicotinic Acid Hydrazide|C0022209|||C0022209|MSH;NCI;NDFRT|||  
INH|Isonicotinic acid hydrazide|C0022209|||C0022209|SNOMEDCT|||  
INH|Isonicotinyl Hydrazine|C0022209|||C0022209|NCI|||  
INH|Isonicotinylhydrazide|C0022209|||C0022209|SNOMEDCT|||  
INH|RESPIR|C0205535|||C0205535|NCI|||  
INH|RESPIRATORY (INHALATION)|||C0205535|NCI|||  
INH|Respiratory use|||C0205535|SNOMEDCT|||  
INH|immunoreactive inhibin|||1|0.0117|  
INH|inh|||C0022209|CHV|||  
INH|inhalant|C0001559;C0598322|||C0598322|CHV;CSP|||  
INH|inhalants|C0598322;C2362548;C2825042|||C0598322|AOD;CHV|||  
INH|inhalation|C0004048;C0205535;C1705211|||C1705211|NCI|||1  
INH|inhaler|C0021461;C1881212;C2825043|1|0.070|||1  
INH|inhibitor|C1999216|||1|0.022|  
INH|isoniazid|C0022209|||C0022209|AOD;CHV;CSP;MTH;MTHSPL;PDQ;RXNORM|1|0.8303|  
INH|isoniazide|||1|0.0117|  
INH|isonicotinic acid  
hydrazide|C0022209|1|0.930|C0022209|AOD;MSH;NCI;NDFRT;PDQ;SNOMEDCT|1|0.1244|  
INH|isonicotinyl hydrazine|C0022209|||C0022209|PDQ|||  
INH|{Inhalation}|C0004048;C0205535;C1705211|||C1705211|NCI|||  
INR|INR|C0525032;C1704538|||C0525032;C1704538|AOT;CHV;LNC;MSH;NCI|||  
INR|INR - Internationalised ratio|C0525032|||C0525032|SNOMEDCT|||  
INR|INR - Internationalized ratio|C0525032|||C0525032|SNOMEDCT|||  
INR|Integrated Neuromusculoskeletal Release|C1704538|||C1704538|AOT;MTH|||  
INR|International Normalized Ratio|C0525032|||C0525032|MSH;MTH;NCI|||  
INR|International Normalized Ratio of Prothrombin  
Time|C0525032|||C0525032|NCI|||  
INR|International Normalized Ratios|C0525032|||C0525032|MSH|||  
INR|International normalised ratio|C0525032|||C0525032|SNOMEDCT|||  
INR|International normalised ratio (procedure)|||C0525032|SNOMEDCT|||  
INR|International normalized ratio|C0525032|||C0525032|SNOMEDCT|||  
INR|International normalized ratio (observable entity)|||C0525032|SNOMEDCT|||

INR|Internationalised ratio|C0525032|||C0525032|SNOMEDCT|||  
INR|Internationalized ratio|C0525032|||C0525032|SNOMEDCT|||  
INR|Normalized Ratio, International|C0525032|||C0525032|MSH|||  
INR|Normalized Ratios, International|C0525032|||C0525032|MSH|||  
INR|Prothrombin Intl. Normalized Ratio|||C0525032|NCI|||  
INR|Prothrombin time|C0033707|||1|0.0137|  
INR|Ratio, International Normalized|C0525032|||C0525032|MSH|||  
INR|Ratios, International Normalized|C0525032|||C0525032|MSH|||  
INR|bcr|||C0525032|CHV|||  
INR|immediate nasal response|||1|  
INR|initiator|C1444748|||1|0.0918|  
INR|initiator element|||1|0.0332|  
INR|insulin receptor|C0034818;C1334133|||1|0.0068|  
INR|international normalised ratio|C0525032|||C0525032|CHV|1|0.1211|  
INR|international normalising ratio|C0525032|||C0525032|CHV|||  
INR|international normalize ratio|C0525032|||C0525032|CHV|||  
INR|international normalized  
ratio|C0525032|1|1.000|C0525032|CHV;MSH;MTH;NCI;SNOMEDCT|1|0.7334|1|  
INR|international normalized ratio (INR)|C0525032|||C0525032|CHV|||  
INR|international normalized ratios|C0525032|||C0525032|CHV|||  
INR|international normalizing ratio|C0525032|||C0525032|CHV|||  
INR|internationalised ratio|C0525032|||C0525032|CHV|||  
IOL|IOL|C0281658|||C0281658|PDQ|||  
IOL|Intraocular Lymphoma|C0281658;C1706527|||C0281658|MTH;NCI|||  
IOL|Intraocular lymphoma|C0281658;C1706527|||C0281658|PDQ|||  
IOL|Primary Intraocular Lymphoma|C0281658|||C0281658|NCI|||  
IOL|induction of labor|C0259787|||1|  
IOL|interosseous ligament|C0447892|||1|0.0968|  
IOL|intraocular  
lens|C0023311;C0023319;C0336564|1|1.000|C0023319;C0336564;C1706007|CHV;MSH;NCI;S  
NOMEDCT|||1|  
IOL|intraocular lens implantation|C0023311|||1|0.1183|  
IOL|intraocular lenses|C0023311;C0023319|||1|0.7849|  
IOL|intraocular lymphoma|C0281658;C1706527|||C0281658|CHV;PDQ|||  
IOL|intraocular lymphoma (IOL)|C0281658;C1706527|||C0281658|CHV|||  
IOL|iOL|C0281658|||C0281658|CHV|||  
IOL|lymphoma, intraocular|C0281658;C1706527|||C0281658|PDQ|||  
IQ|2-Amino-3-methylimidazo[4,5-f]quinoline|||C1312059|MTH;NCI|||  
IQ|2-amino-3-methyl-3H-imidazo[4,5-f]quinoline|C2744043|||1|0.0134|  
IQ|2-amino-3-methyl-imidazo[4,5-f]quinoline|||1|0.0334|  
IQ|2-amino-3-methylimidazo(4,5-f)- quinoline|||C1312059|MSH|||  
IQ|2-amino-3-methylimidazo[4,5-f]quinoline|||1|0.4927|  
IQ|3-Methyl-3H-imidazo[4,5-f]quinolin-2-amine|||C1312059|NCI|||  
IQ|5-f]quinoline|||1|0.016|  
IQ|IQ|||C0022066;C0456149;C1312059|CSP;NCI|||  
IQ|IQ - Intelligence quotient|C0456149|||C0456149|SNOMEDCT|||  
IQ|IRAQ|C0022066|||C0022066|NCI|||  
IQ|IRQ|C0022066|||C0022066|NCI|||  
IQ|IZ|||C0022066|NCI|||  
IQ|Ilimaquinone|C1171731|||1|0.0134|  
IQ|Intelligence quotient|C0456149|||C0456149|MTH;SNOMEDCT|||  
IQ|Intelligence quotient (observable entity)|||C0456149|SNOMEDCT|||  
IQ|Iraq|C0022066|||C0022066|AOD;CHV;LCH;MSH;MTH;NCI;SNOMEDCT|||  
IQ|Iraq (geographic location)|||C0022066|SNOMEDCT|||  
IQ|ilimaquinone|C1171731|||C1171731|MSH|||  
IQ|intelligence|C0021704|||1|0.0534|  
IQ|intelligence quotient|C0456149|1|1.000|C0456149|CHV;MTH;SNOMEDCT|1|0.3632|1

IQ|intelligence quotient (IQ)|C0456149|||C0456149|CHV|||  
IQ|interquartile|||1|0.0147|  
IQ|interquartile range|C1711350|||C1711350|NCI|||  
IQ|iQ|||C0456149|CHV|||  
IR|Calcitonin gene-related peptide (CGRP)-immunoreactive|||1|0.0024|  
IR|INNERV|||C1619351|MSH|||  
IR|IR|C0022065;C0022071|||C0022065;C1619351|MSH;NCI|||  
IR|IRAN|C0022065|||C0022065|NCI|||  
IR|IRIDIUM|C0022071;C0885452|||C0022071|NCI|||  
IR|IRN|C0022065|||C0022065|NCI|||  
IR|Incomplete Repair|||1|0.0018|  
IR|Infra-red|C1532326|||1|0.0049|  
IR|Insulin resistance|C0021655;C2700570|||1|0.0605|  
IR|Interventional radiology|C0034602;C0344093|||1|0.0039|  
IR|Intrarectal|||1|0.003|  
IR|Ir|C0022065;C0022071|||C0022071|NCI|||  
IR|Ir element|C0022071|||C0022071|CSP|||  
IR|Iran|C0022065|||C0022065|AOD;LCH;MSH;MTH;NCI;SNOMEDCT|||  
IR|Iran (geographic location)|||C0022065|SNOMEDCT|||  
IR|Iran, Islamic Republic of|||C0022065|NCI|||  
IR|Iridium|C0022071;C0885452|||C0022071|LCH;MSH;MTH;NCI;NDFRT;SNOMEDCT|||  
IR|Iridium (substance)|||C0022071|SNOMEDCT|||  
IR|Iridium Metallicum|C0022071|||C0022071|NCI|||  
IR|Iridium [Chemical/Ingredient]|||C0022071|NDFRT|||  
IR|Iridium, NOS|C0022071;C0885452|||C0022071|SNOMEDCT|||  
IR|Ischemia-reperfusion|||1|0.0534|  
IR|Ratio|C0456603;C1547037|||1|0.0071|  
IR|current|C0521116;C1705970|||1|0.002|  
IR|idiopathic rhinitis|||1|  
IR|ileal resection|C0399935|||C0399935|CHV;SNOMEDCT|||1|  
IR|imidazoline receptors|C0063390|||1|0.0026|  
IR|immediate-release|C1708470|1|0.204|||1|0.0333|1|  
IR|immune  
response|C0301872|||C0301872|AOD;CHV;CSP;GO;MTH;NCI;SNOMEDCT|1|0.0225|1|  
IR|immunization rate|||1|  
IR|immunologic response|||1|  
IR|immunoreactive|||1|0.1679|1|  
IR|immunoreactivity|C0597879|||1|0.1843|  
IR|immunoreagent|||1|  
IR|impedance rheography|||1|  
IR|implantation rate|||1|0.0035|  
IR|inactive renin|C0072249|||1|0.0039|  
IR|incidence rate|C1708485|||1|0.0136|  
IR|incisal ridge|||1|  
IR|index of response|||1|  
IR|individual reaction|||1|  
IR|inferior rectus|C0224129;C0582819|||1|0.0043|1|  
IR|inflow resistance|||1|  
IR|information  
retrieval|C0021427;C0079623|||C0021427;C0079623|AOD;CHV;CSP;MSH;MTH|1|0.0049|  
IR|infrared|C1532326|1|0.002|C1532326|SNOMEDCT|1|0.1141|1|  
IR|infrared spectroscopy|C0260249|||1|0.0122|  
IR|infrarenal|||1|  
IR|inhibition rate|||1|0.0047|  
IR|innervation|C0021516;C0026828;C1619351|||C1619351|GO;MSH|||  
IR|innervation aspect|C1619351|||C1619351|MTH|||  
IR|inside radius|||1|

IR|insoluble residue|||||||1  
IR|inspiratory reserve|||||||1  
IR|inspiratory resistance|||||||1  
IR|insulin receptor|C0034818;C1334133|||||1|0.1068|1  
IR|insulin requirement|||||||1  
IR|insulin  
resistance|C0021655;C2700570|||C0021655;C2700570|CHV;CSP;LCH;MEDLINEPLUS;MSH;MTH  
;NDFRT;OMIM;SNOMEDCT|||1  
IR|insulin response|||||||1  
IR|insulin-resistant|||||||1|0.0067|  
IR|integer ratio|||||||1  
IR|intelligence ratio|||||||1  
IR|intergenic region|C0887859|||||1|0.0026|  
IR|intermediate risk|||||||1|0.003|  
IR|internal reduction|C0745350|||||||1  
IR|internal resistance|||||||1  
IR|internal rotation|C0231459|1|0.004|C0231459|CHV;SNOMEDCT;UWDA|1|0.0032|1  
IR|interventional  
radiology|C0034602;C0344093|1|0.788|C0034602;C0344093|CHV;LNC;MSH;MTH;NCI;PDQ;SN  
OMEDCT|||1  
IR|intrarectal|||||||1  
IR|intrarenal|||||||1|0.0022|1  
IR|intrastent restenosis|||||||1  
IR|inversion recovery|||||||1|0.0311|1  
IR|inverted repeat|||||||1|0.0258|  
IR|inverted repeats|||||||1  
IR|ionizing irradiation|||||||1|0.0016|  
IR|ionizing  
radiation|C0034538|||C0034538|AOD;CHV;CSP;MSH;MTH;NCI;SNOMEDCT|1|0.0822|1  
IR|iran|C0022065|||C0022065|CHV|||  
IR|iridium|C0022071;C0885452|||C0022071|AOD;CHV;CSP|||1  
IR|irritant reaction|||||||1  
IR|ischaemia-reperfusion|||||||1|0.0106|  
IR|ischemia and reperfusion|||||||1|0.0039|1  
IR|isotonic reversal|||||||1  
IR|isovolumetric relaxation|||||||1  
IR|isovolumic relaxation|C2924435|||C2924435|LNC|1|0.001|  
IR|min of reperfusion|||||||1|0.0008|  
IR|near-infrared|||||||1|0.0047|  
IR|nerve supply|C0021516;C1619351|||C1619351|MSH|||  
IR|reaction|C0443286;C1114821|||||||1|0.0018|  
IR|resistance index|C0807745|||||||1|0.0012|  
IS|DNA Insertion Element|C0600204|||C0600204|MSH|||  
IS|DNA Insertion Elements|C0600204|||C0600204|MSH;MTH;NCI|||  
IS|Element, DNA Insertion|C0600204|||C0600204|MSH|||  
IS|Elements, DNA Insertion|C0600204|||C0600204|MSH|||  
IS|IC|C0587121|||C0020750|NCI|||  
IS|ICELAND|C0020750|||C0020750|DXP;NCI|||  
IS|IL|C0020898;C0021764;C0022271|||C0022271|NCI|||  
IS|IMMUNE SUPPRESSION|C0021079;C1373218;C1840264|||C1840264|MSH;OMIM|||  
IS|INSTRUM|||C0021632|MSH|||  
IS|IS|||C0020750;C0021632;C0022271;C0600204;C1840264|MSH;NCI;OMIM|||  
IS|IS Element|||C0600204|NCI|||  
IS|ISCW|C1840264|||C1840264|OMIM|||  
IS|ISL|C0020750|||C0020750|NCI|||  
IS|ISR|C0022271|||C0022271|NCI|||  
IS|ISRAEL|C0022271|||C0022271|NCI|||

IS|ISSCW|C1840264|||C1840264|OMIM|||  
IS|Iceland|C0020750|||C0020750|AOD;CSP;LCH;MSH;MTH;NCI;SNOMEDCT|||  
IS|Iceland (geographic location)|||C0020750|SNOMEDCT|||  
IS|Infantile spasms|C0037769|||1|0.0497|  
IS|Insertion Element, DNA|C0600204|||C0600204|MSH|||  
IS|Insertion Elements, DNA|C0600204|||C0600204|MSH|||  
IS|Insertion Sequence|C0600204|||C0600204|NCI|||  
IS|Insertion Sequence Element|C0205742;C0600204|||C0600204|NCI|||  
IS|International Standard|||1|0.0369|  
IS|Ionescu-Shiley|||1|  
IS|Is|||C1556119|HL7V3.0|||  
IS|Israel|C0022271|||C0022271|AOD;CSP;LCH;MSH;MTH;NCI;SNOMEDCT|||  
IS|Israel (geographic location)|||C0022271|SNOMEDCT|||  
IS|STREPTOCOCCAL CELL WALL ANTIGEN, SUPPRESSION OF IMMUNE RESPONSE  
TO|||C1840264|OMIM|||  
IS|Supernumerary maxillary left first primary|C1556119|||C1556119|MTH|||  
IS|currently active tumor stage|C0441913|||C0441913|CHV|||  
IS|iceland|C0020750|||C0020750|CHV|||  
IS|idiopathic  
scoliosis|C0595995|||C0036440;C0595995|CHV;ICD9CM;MTH;SNOMEDCT|1|0.0235|  
IS|ileal segment|C0440779|||C0440779|SNOMEDCT|||1  
IS|ilial segment|C0440779|||1|  
IS|iliosacral|||1|  
IS|immediate sensitivity|||1|  
IS|immobilization stress|||1|0.0087|  
IS|immune serum|C0020960|||C0020960|CHV;CSP|1|0.0047|1  
IS|immune suppression|C0021079;C1373218;C1840264|1|0.002|||1|  
IS|immune suppressor|||1|  
IS|immune  
system|C0020962|||C0020962|AOD;CHV;CSP;FMA;LCH;LNC;MEDLINEPLUS;MSH;MTH;NCI;SNOME  
DCT;UWDA|1|0.0121|  
IS|immunological synapse|C1171348|||1|0.0168|  
IS|immunoscintigraphy|C0085264|||C0085264|NCI|1|0.0349|  
IS|immunostaining|||1|0.006|  
IS|immunosuppressed|||1|0.0087|  
IS|immunosuppression|C0021079;C0021080;C1373218|||C0021079;C0021080;C1373218|AOD  
;CHV;CSP;LCH;MSH;NCI;NDFRT;PDQ;SNOMEDCT|1|0.0201|  
IS|immunosuppressive|C0021081|||C0021081|CHV;CSP;NCI|1|0.0228|  
IS|immunosuppressive substance|||1|0.0074|  
IS|immunosuppressive therapy|C0021079|||1|0.0074|  
IS|imperative stimulus|||1|0.0047|  
IS|impingement syndrome|C0263912|||C0263912|CHV;COSTAR;SNOMEDCT|||1  
IS|in situ|||1|  
IS|incentive spirometer|C1961253|1|0.006|C1961253|CHV|||1  
IS|incentive spirometry|C0454512|||C0454512|CHV;MTH;SNOMEDCT|1|0.0101|  
IS|index of saponification|||1|  
IS|index of sexuality|||1|  
IS|indoxyl sulfate|C0021210|||C0021210|MSH;NDFRT|1|0.0074|  
IS|induced sputum|C3179346|||C3179346|MSH|1|0.0369|1  
IS|inescapable shock|||1|0.0215|  
IS|infant size|||1|  
IS|infantile spasm|C0037769|||C0037769|CHV;MSH;NCI;OMIM|||1  
IS|infarct size|||1|0.0994|  
IS|information system|C0021428|1|0.002|||1|  
IS|information systems|C0021428|||1|0.0262|  
IS|infrahyoid strap|||1|  
IS|initial segment|C1523840|||C1523840|GO|1|0.0134|1

IS|inner segments|||||1|0.0067|  
IS|insertion|C0021107;C0441587;C1512796;C1883719|||C0441587;C1512796;C1883719|CH  
V;HL7V3.0;LNC;NCI;SNOMEDCT|1|0.0067|  
IS|insertion element|C0600204|||C0600204|CSP|||  
IS|insertion sequence|C0600204|||C0600204|CSP;NCI|1|0.1256|1  
IS|instrumentation|C0021632;C0348000;C1704339|||C0021632|MSH|||  
IS|instrumentation aspects|C0021632|||C0021632|MTH|||  
IS|insufficient signal|||||||1  
IS|insulin secretion|C1256369|||||||1  
IS|insulin sensitivity|C0920563|||||1|0.0322|  
IS|intercellular space|C0015352|||C0015352|FMA;GO;MSH;SNOMEDCT;UWDA|||1  
IS|intercostal space|C0230136;C1269872|||||||1  
IS|interictal spike|||||||1  
IS|internal standard|||||1|0.2411|1  
IS|international standard|||||||1  
IS|interspace|||||||1  
IS|interstitial space|C0225319|||C0225319|AOD;CHV;FMA;SNOMEDCT;UWDA|||1  
IS|interventricular septum|C0225870|||||1|0.0034|1  
IS|intracardial shunt|||||||1  
IS|intraspinal|C1283188|||C1283188;C1522227|CHV;MTH;NCI;SNOMEDCT|||1  
IS|intrasplenic|||||||1  
IS|intraatriatal|||||||1  
IS|invalided from service|||||||1  
IS|inventory of systems|||||||1  
IS|ionic strength|C0086486|||C0086486|CSP;MSH;NCI|1|0.0107|  
IS|ionized serum||1|0.002|||||  
IS|ipecac syrup|C0022046|||||||1  
IS|is||||C0441913|SNOMEDCT|||  
IS|is (tumor staging)|C0441913|||C0441913|MTH;SNOMEDCT|||  
IS|ischaemic stroke|C0948008|||||1|0.0087|  
IS|ischemia|C0022116|||C0022116|AOD;CHV;COSTAR;CSP;LCH;MSH;MTH;NCI;NDFRT;SNOMEDC  
T|1|0.006|  
IS|ischemic|C0475224|||C0475224|CHV;MTH;SNOMEDCT|||  
IS|ischemic score|||||||1  
IS|ischemic stroke|C0948008|||C0948008|CHV;MTH;OMIM;SNOMEDCT|1|0.0423|  
IS|island|C0022130|||||||1  
IS|islet|||||||1  
IS|isolation|C0204727;C0205409;C0220862|||||||1  
IS|isoproterenol|C0022245|||C0022245|AOD;CHV;CSP;LCH;MSH;NCI;NDFRT;RXNORM;SNOMED  
CT;USPMG;VANDF|||  
IS|isosorbide|C0022251|||C0022251|AOD;CHV;MSH;MTHSPL;NCI;NDFRT;RXNORM;SNOMEDCT;U  
SPMG;VANDF|||  
IS|isotonic saline|||||1|0.0054|  
IS|israel|C0022271|||C0022271|CHV|||  
IS|score|C0449820|||||1|0.0107|  
IS|slow inward current|||||1|0.0141|  
IS|space|C1883067|||||1|0.0067|  
ITP|AITP|C0043117|||C0043117|OMIM|||  
ITP|Autoimmune Thrombocytopenic Purpura|C0043117|||C0043117|MSH;NDFRT|||  
ITP|Autoimmune Thrombocytopenic Purpuras|C0043117|||C0043117|MSH|||  
ITP|Autoimmune thrombocytopenic purpura|C0043117|||C0043117|SNOMEDCT|||  
ITP|Disease, Werlhof|C0043117|||C0043117|MSH|||  
ITP|Disease, Werlhof's|C0043117|||C0043117|MSH|||  
ITP|IDIOPATHIC THROMBOCYTOPENIC PURPURA|C0043117|||C0043117|COSTAR;OMIM|||  
ITP|IMMUNE THROMBOCYTOPENIC PURPURA|C0043117;C0398650|||C0043117|OMIM|||  
ITP|ITP|C0021540;C0043117|||C0021540;C0043117|CHV;DXP;MSH;NCI;NDFRT;OMIM;SNOMEDC  
T|||

ITP|ITP - Idiopathic thrombocytopenic purpura|C0043117|||C0043117|SNOMEDCT|||  
ITP|ITP - Inosine triphosphate|C0021540|||C0021540|SNOMEDCT|||  
ITP|ITP - idiopathic thrombocytopenic purpura|C0043117|||C0043117|SNOMEDCT|||  
ITP|ITP, NOS|C0021540;C0043117|||C0043117|SNOMEDCT|||  
ITP|Ideopath thrombocytopenic pur|||C0043117|SNOMEDCT|||  
ITP|Idiopathic Thrombocytopenia|C0043117;C0920163|||C0043117|NCI|||  
ITP|Idiopathic Thrombocytopenia Purpura|C0043117|||C0043117|NCI|||  
ITP|Idiopathic Thrombocytopenic Purpura|C0043117|||C0043117|MSH;NCI;NDFRT|||  
ITP|Idiopathic Thrombocytopenic Purpuras|C0043117|||C0043117|MSH|||  
ITP|Idiopathic purpura|C0043117|||C0043117|SNOMEDCT|||  
ITP|Idiopathic purpura (& thrombocytopenic)|||C0043117|SNOMEDCT|||  
ITP|Idiopathic purpura (& thrombocytopenic) (disorder)|||C0043117|SNOMEDCT|||  
ITP|Idiopathic purpura, NOS|C0043117|||C0043117|SNOMEDCT|||  
ITP|Idiopathic thrombocytopenic  
purpura|C0043117|||C0043117|MTHICD9;OMIM;SNOMEDCT|||  
ITP|Idiopathic thrombocytopenic purpura (ITP)|C0043117|||C0043117|OMIM|||  
ITP|Idiopathic thrombocytopenic purpura (disorder)|||C0043117|SNOMEDCT|||  
ITP|Idiopathic thrombocytopenic purpura, NOS|C0043117|||C0043117|SNOMEDCT|||  
ITP|Inosine 5'-(tetrahydrogen triphosphate)|||C0021540|MSH;NDFRT|||  
ITP|Inosine Triphosphate|C0021540|||C0021540|MSH;MTH;NDFRT|||  
ITP|Inosine Triphosphate [Chemical/Ingredient]|||C0021540|NDFRT|||  
ITP|Inosine triphosphate|C0021540|||C0021540|SNOMEDCT|1|0.0154|  
ITP|Inosine triphosphate (substance)|||C0021540|SNOMEDCT|||  
ITP|Ion transport peptide|||1|0.0077|  
ITP|PURPURA, THROMBOCYTOPENIC, IDIOPATHIC|C0043117|||C0043117|DXP|||  
ITP|Purpura, Autoimmune Thrombocytopenic|C0043117|||C0043117|MSH|||  
ITP|Purpura, Idiopathic Thrombocytopenic|C0043117|||C0043117|MSH|||  
ITP|Purpura, Thrombocytopenic, Autoimmune|C0043117|||C0043117|MSH;NDFRT|||  
ITP|Purpura, Thrombocytopenic, Idiopathic|C0043117|||C0043117|MSH;MTH;NDFRT|||  
ITP|Purpura, Thrombocytopenic, Idiopathic [Disease/Finding]|||C0043117|NDFRT|||  
ITP|Purpuras, Autoimmune Thrombocytopenic|C0043117|||C0043117|MSH|||  
ITP|Purpuras, Idiopathic Thrombocytopenic|C0043117|||C0043117|MSH|||  
ITP|THROMBOCYTOPENIC PURPURA, AUTOIMMUNE|C0043117|||C0043117|OMIM|||  
ITP|Thrombocytopenia Due to Platelet  
Alloimmunization|C0043117;C0272286|||C0043117|NCI|||  
ITP|Thrombocytopenic Purpura, Autoimmune|C0043117|||C0043117|MSH|||  
ITP|Thrombocytopenic Purpura, Idiopathic|C0043117|||C0043117|MSH|||  
ITP|Thrombocytopenic Purpuras, Autoimmune|C0043117|||C0043117|MSH|||  
ITP|Thrombocytopenic Purpuras, Idiopathic|C0043117|||C0043117|MSH|||  
ITP|Triphosphate, Inosine|C0021540|||C0021540|MSH|||  
ITP|WERLHOF DIS|||C0043117|MSH|||  
ITP|WERLHOF DISEASE|C0043117|||C0043117|DXP|||  
ITP|WERLHOFS DIS|||C0043117|MSH|||  
ITP|Werlhof Disease|C0043117|||C0043117|MSH;NDFRT|||  
ITP|Werlhof's Disease|C0043117|||C0043117|MSH;NDFRT|||  
ITP|Werlhof's disease|C0043117|||C0043117|SNOMEDCT|||  
ITP|Werlhofs Disease|C0043117|||C0043117|MSH|||  
ITP|capillary isotachopheresis|||1|0.0208|  
ITP|idiopathic purpura|C0043117|||C0043117|CHV|||  
ITP|idiopathic  
thrombocytopenia|C0043117;C0920163|||C0043117;C0920163|CHV;MTH;NCI;OMIM|1|0.0224  
|  
ITP|idiopathic thrombocytopenic  
purpura|C0043117|1|1.000|C0043117|COSTAR;MSH;MTHICD9;NCI;NDFRT;OMIM;SNOMEDCT|1|0  
.8418|1  
ITP|idiopathic thrombocytopenic purpura (ITP)|C0043117|||C0043117|CHV|||  
ITP|immune thrombocytopenia|C0272286|||C0272286|CHV;NCI;OMIM;SNOMEDCT|1|0.0486|

ITP|immune thrombocytopenic  
purpura|C0043117;C0398650|||C0043117;C0398650|CHV;ICD9CM;MTH;NCI;OMIM;SNOMEDCT||  
|1  
ITP|inosine 5'-triphosphate|||||1|0.0093|  
ITP|inosine triphosphate|C0021540|||C0021540|MSH;MTH;NDFRT;SNOMEDCT|||1  
ITP|inosine triphosphate (ITP)|C0021540|||C0021540|CHV|||  
ITP|interim treatment plan|||||1  
ITP|interim treatment planning|||||1  
ITP|intrathoracic pressure|||||1|0.0247|  
ITP|inverse treatment plan|||||1  
ITP|inverse treatment planning|||||1  
ITP|islet-cell tumor of pancreas|||||1  
ITP|isotachophoresis|C0022257|||C0022257|MSH|||  
ITP|isotachophoretic|||||1|0.0093|  
ITP|werlhof's disease|C0043117|||C0043117|CHV|||  
IT|(drug) IT|||1|0.004|||  
IT|Ca2+ current|||||1|0.0058|  
IT|INTRATHECAL|C1370196|||C0677897|NCI|||  
IT|IT|||C0022277;C0677897|NCI|||  
IT|ITA|C0022277|||C0022277|NCI|||  
IT|ITALY|C0022277|||C0022277|NCI|||  
IT|Immune Tolerance|C0020963|||1|0.0043|  
IT|Intrathecal|C1370196|||C0677897|HL7V2.5;NCI;SNOMEDCT|||  
IT|Intrathecal Route of Administration|C0677897|||C0677897|NCI|||  
IT|Intrathecal Route of Drug Administration|C0677897|||C0677897|MTH|||  
IT|Intrathecal route|C0205527;C0677897|||C0677897|SNOMEDCT|||  
IT|Intrathecal route (qualifier value)|||C0677897|SNOMEDCT|||  
IT|Intrathecal use|C0677897|||C0677897|SNOMEDCT|||  
IT|IntrathecalRoute|C0677897|||C0677897|HL7V3.0|||  
IT|Intrathymic|||||1|0.0154|  
IT|Intratracheal|||||1|0.0534|  
IT|Italy|C0022277|||C0022277|AOD;CSP;LCH;MSH;MTH;NCI;SNOMEDCT|||  
IT|Italy (geographic location)|||C0022277|SNOMEDCT|||  
IT|administered intrathecally|||||1|0.0232|  
IT|iliotibial|||1|0.080|||1  
IT|immature-to-total neutrophil|||1|0.002|||1  
IT|immunity test|||||1  
IT|immunologic test|C0021061|||||1  
IT|immunological test|C0021061|||C0021061|CHV;MSH|||  
IT|immunotherapy|C0021083|||C0021083|AOD;CHV;CSP;LCH;MSH;MTH;NCI;SNOMEDCT|||1  
IT|immunotoxin|C0021084|||C0021084|CHV;CSP;MSH;NCI;NDFRT;PDQ|1|0.0616|  
IT|immunotoxin therapy|C0796507|||||1  
IT|implantation test|||||1  
IT|incentive therapy|||||1  
IT|individual therapy|C0204525|||C0204525|AOD;CHV|||1  
IT|inferior temporal|||||1|0.0303|1  
IT|inferior temporal cortex|||||1|0.0125|  
IT|inferior turbinate|C0225434|||||1  
IT|inferotemporal|||||1|0.0125|  
IT|inferotemporal cortex|||||1|0.0082|  
IT|information  
technology|C0021423;C0683867|1|0.206|C0021423;C0683867|AOD;CHV;NCI|1|0.1021|1  
IT|information transfer|C0681300|||||1|0.0024|  
IT|inhalation test|||||1  
IT|inhalation therapy|C0021459|||||1  
IT|injected intrathecally|||||1|0.0207|  
IT|injected intratumorally|||||1|0.0029|

IT|injection|C0021485;C1272883;C1533685|||||1|0.0043|  
IT|injection time|||||||1|  
IT|inspection time|||||1|0.0082|  
IT|inspiratory time|C0428686|1|0.002|||||1|  
IT|insulin therapy|||||||1|  
IT|insulin treatment|C0745343|||||||1|  
IT|intact|C0205266;C1554187|||||||1|  
IT|intensive therapy|||||1|0.0039|1|  
IT|intentional tremor|||||||1|  
IT|intermediate trophoblast|C1512865;C2335060|||||1|0.0077|  
IT|intermittent traction|C0565524|||||||1|  
IT|internal thoracic|||||||1|  
IT|interstitial tissue|C0225318|||C0225318|CHV;SNOMEDCT|||1|  
IT|intertrochanteric|C0745355|1|0.028|||||1|  
IT|intertuberous|||||||1|  
IT|intestinal transplantation|||||1|0.0067|  
IT|intimal thickening|||||||1|  
IT|intimal thickness|||||1|0.0048|  
IT|into the spinal space|C0677897|||C0677897|CHV|||  
IT|intolerance and toxicity|||||||1|  
IT|intracellular tachyzoite|||||||1|  
IT|intradermal test|C0021881|||C0021881|AOD;CHV;MSH|||1|  
IT|intratesticular|||C1517559|NCI;SNOMEDCT|||1|  
IT|intrathecal|C1370196|1|0.116|C0677897;C1370196|CHV;HL7V2.5;NCI;SNOMEDCT|1|0.4525|1|  
IT|intrathoracic|C0595836|||C0595836|NCI;SNOMEDCT|1|0.0063|1|  
IT|intrathymic|||||1|0.012|  
IT|intratracheal|||C1522653|NCI;SNOMEDCT|1|0.0453|1|  
IT|intratracheal instillation|C1555389|||||1|0.0091|  
IT|intratracheally|||||1|0.0347|  
IT|intratumoral|C1517564|||C1517564|NCI|1|0.0346|1|  
IT|ischial  
tuberosity|C0223656;C1279109|1|0.096|C0223656;C1279109|CHV;FMA;SNOMEDCT;UWDA|||1|  
IT|isomeric transition|||||||1|  
IT|italy|C0022277|||C0022277|CHV|||  
IT|pravastatin or atorvastatin evaluation and infection therapy||1|0.002|||||  
IT|specific immunotherapy|||||1|0.0082|  
IT|treatment|C0039798;C0087111;C1522326;C1533734;C1705169;C3161471|||||1|0.0063|  
IUD|Contraceptive Device, Intrauterine|C0021900|||C0021900|MSH|||  
IUD|Contraceptive Devices, Intrauterine|C0021900|||C0021900|MSH|||  
IUD|Contraceptive IUD|C0021900|||C0021900|MSH|||  
IUD|Contraceptive IUDs|C0021900|||C0021900|MSH|||  
IUD|Device, Intrauterine|C0021900|||C0021900|MSH|||  
IUD|Device, Intrauterine Contraceptive|C0021900|||C0021900|MSH|||  
IUD|Devices, Intrauterine|C0021900|||C0021900|MSH|||  
IUD|Devices, Intrauterine Contraceptive|C0021900|||C0021900|MSH|||  
IUD|INTRAUTERINE DEVICE|C0021900|||C0021900;C1706306|DXP;NCI|||  
IUD|IUCD|C0021900|||C0021900|NCI;SNOMEDCT|||  
IUD|IUCD - Intrauterine contraceptive device|||C0021900|SNOMEDCT|||  
IUD|IUD|C0021900;C1706306|||C0021900;C1706306|CHV;CSP;NCI;SNOMEDCT|||  
IUD|IUD - Intrauterine device|C0021900|||C0021900|SNOMEDCT|||  
IUD|IUD, Contraceptive|C0021900|||C0021900|MSH|||  
IUD|IUDs, Contraceptive|C0021900|||C0021900|MSH|||  
IUD|Intra Uterine Device|C0021900|||C0021900|NCI|||  
IUD|Intra-uterine device|C0021900|||C0021900|SNOMEDCT|||  
IUD|Intrauterine Contraceptive Device|C0021900|||C0021900|MSH;NCI|||  
IUD|Intrauterine Contraceptive Devices|C0021900|||C0021900|MSH|||

IUD|Intrauterine Device|C0021900|||C0021900;C1706306|MSH;NCI|||  
IUD|Intrauterine Device Dosage Form|C1706306|||C1706306|MTH;NCI|||  
IUD|Intrauterine Device Dose Form|C1706306|||C1706306|NCI|||  
IUD|Intrauterine Devices|C0021900|||C0021900|MSH;MTH|||  
IUD|Intrauterine contraceptive device|C0021900|||C0021900|SNOMEDCT|||  
IUD|Intrauterine contraceptive device (physical object)|||C0021900|SNOMEDCT|||  
IUD|Intrauterine device|C0021900|||C0021900|SNOMEDCT|||  
IUD|Intrauterine device (physical object)|||C0021900|SNOMEDCT|||  
IUD|Intrauterine device (product)|||C0021900|SNOMEDCT|||  
IUD|Intrauterine device (qualifier value)|||C0021900|SNOMEDCT|||  
IUD|device intrauterine|||C0021900|CHV|||  
IUD|devices intra uterine|||C0021900|CHV|||  
IUD|devices intrauterine|||C0021900|CHV|||  
IUD|interuncal distance|||1  
IUD|intra uterine device|C0021900|||C0021900|CHV|||  
IUD|intra-uterine device|C0021900|||C0021900|CHV|||  
IUD|intrauterine contraceptive device|C0021900|||1|0.198|  
IUD|intrauterine  
death|C0015927;C0595939|||C0015927;C0595939|CCS;CHV;OMIM;SNOMEDCT|||1  
IUD|intrauterine  
device|C0021900|1|1.000|C0021900;C1546682;C1548866;C1706306|CHV;DXP;HL7V2.5;MSH;  
NCI;SNOMEDCT|1|0.802|1  
IUD|intrauterine devices|C0021900|||C0021900|CHV|||  
IUD|intrauterine devices (IUD)|C0021900|||C0021900|CHV|||  
IUD|iucd|C0021900|||C0021900|CHV|||  
IUD|iuds|C0021900|||C0021900|CHV|||  
IUGR|(Fetal growth retardation NOS) or (intrauterine growth  
retardation)|||C0015934|SNOMEDCT|||  
IUGR|(Fetal growth retardation NOS) or (intrauterine growth retardation)  
(disorder)|||C0015934|SNOMEDCT|||  
IUGR|FGR - Fetal growth retardation|||C0015934|SNOMEDCT|||  
IUGR|Fet growth retard wtNOS|||C0015934|ICD9CM|||  
IUGR|Fetal Growth Restriction|C0015934|||C0015934|NCI|||  
IUGR|Fetal Growth Retardation|C0015934|||C0015934|MSH;MTH;NCI;NDFRT|||  
IUGR|Fetal Growth Retardation [Disease/Finding]|||C0015934|NDFRT|||  
IUGR|Fetal growth restriction|C0015934|||C0015934|SNOMEDCT|||  
IUGR|Fetal growth retardation|C0015934|||C0015934|NCI;SNOMEDCT|||  
IUGR|Fetal growth retardation (disorder)|||C0015934|SNOMEDCT|||  
IUGR|Fetal growth retardation NOS|C0015934|||C0015934|SNOMEDCT|||  
IUGR|Fetal growth retardation NOS (disorder)|||C0015934|SNOMEDCT|||  
IUGR|Fetal growth retardation, NOS|C0015934|||C0015934|SNOMEDCT|||  
IUGR|Fetal growth retardation, unspecified|C0015934|||C0015934|ICD9CM|||  
IUGR|Fetal growth retardation, unspecified  
[weight]|C0015934|||C0015934|ICD9CM|||  
IUGR|Fetal growth retardation, unspecified weight|C0015934|||C0015934|MTHICD9|||  
IUGR|Foetal growth retardation, NOS|C0015934|||C0015934|SNOMEDCT|||  
IUGR|Growth Retardation, Fetal|C0015934|||C0015934|MSH|||  
IUGR|Growth Retardation, Intrauterine|C0015934|||C0015934|MSH;NDFRT|||  
IUGR|IUGR|C0015934|||C0015934|MSH;NCI;NDFRT|||  
IUGR|IUGR - Intrauterine growth retardation|||C0015934|SNOMEDCT|||  
IUGR|Insufficiency - placental|||C0015934|SNOMEDCT|||  
IUGR|Intrauterine Growth Restriction|C0015934|||C0015934|NCI|||  
IUGR|Intrauterine Growth Retardation|C0015934|||C0015934|MSH;NCI;NDFRT|||  
IUGR|Intrauterine growth restriction|C0015934|||C0015934|OMIM|||  
IUGR|Intrauterine growth  
retardation|C0015934|||C0015934|MTHICD9;OMIM;SNOMEDCT|||  
IUGR|Intrauterine growth retardation (IUGR)|C0015934|||C0015934|OMIM|||

IUGR|Intrauterine growth retardation, NOS|C0015934|||C0015934|SNOMEDCT|||  
IUGR|Intrauterine growth retardatn.|||C0015934|SNOMEDCT|||  
IUGR|Intrauterine growth retarded|||1|0.0504|  
IUGR|Microsomia|C0015934|||C0015934|SNOMEDCT|||  
IUGR|Microsomic baby|C0015934|||C0015934|SNOMEDCT|||  
IUGR|Poor fetal growth|C0015934|||C0015934|SNOMEDCT|||  
IUGR|Poor fetal growth state|C0015934|||C0015934|SNOMEDCT|||  
IUGR|Retardation, Fetal Growth|C0015934|||C0015934|MSH|||  
IUGR|Retardation, Intrauterine Growth|C0015934|||C0015934|MSH|||  
IUGR|fetal growth retardation|C0015934|||C0015934|CHV|||  
IUGR|growth intrauterine restriction|C0015934|||C0015934|CHV|||  
IUGR|growth intrauterine retardation|C0015934|||C0015934|CHV|||  
IUGR|growth retarded fetuses|||1|0.0047|  
IUGR|intrauterine growth rate|||1|  
IUGR|intrauterine growth restriction|C0015934|1|1.000|C0015934|CHV;CSP|1|0.249|1  
IUGR|intrauterine growth retard|C0015934|||C0015934|CHV|||  
IUGR|intrauterine growth  
retardation|C0015934|||C0015934|CHV;CSP;MSH;MTHICD9;NCI;NDFRT;OMIM;SNOMEDCT|1|0.  
6698|  
IUGR|intrauterine growth-restricted|||1|0.026|  
IUGR|iugr|C0015934|||C0015934|CHV|||  
IUGR|iugrs|C0015934|||C0015934|CHV|||  
IUGR|microsomia|C0015934|||C0015934|CHV|||  
IUGR|poor fetal growth|C0015934|||C0015934|CHV|||  
IUGR|prenatal growth disorder|C0015934|||C0015934|CSP|||  
IUPC|IUPC|C1443347|||C1443347|SNOMEDCT|||  
IUPC|Intrauterine pressure catheter|C1443347|||C1443347|SNOMEDCT|||  
IUPC|Intrauterine pressure catheter, device|C1443347|||C1443347|MTH;SNOMEDCT|||  
IUPC|Intrauterine pressure catheter, device (physical  
object)|||C1443347|SNOMEDCT|||  
IUPC|intrauterine pressure catheter|C1443347|1|1.000|||1|  
IUP|intraurethral pressure|||1|0.15|  
IUP|intrauterine pregnancy|C0149973|1|1.000|C0149973|CHV;SNOMEDCT|1|0.52|1  
IUP|intrauterine pressure|||1|0.33|1  
IU|F2|C0439453;C1414504|||C0439453|NCI|||  
IU|INTERNATIONAL UNITS|C0439453|||C0439453|NCI|||  
IU|IU|C0439453|||C0439453|NCI;SNOMEDCT|||  
IU|IU (qualifier value)|||C0439453|SNOMEDCT|||  
IU|Indiana University|||1|0.0585|  
IU|International Unit|C0439453|1|1.000|C0439453|MTH;NCI|||1  
IU|International Unit of Biological Activity|C0439453|||C0439453|NCI|||  
IU|International Units|C0439453|||C0439453|NCI|||  
IU|Intrauterine|C0694756|||1|0.0479|  
IU|Unit International|||C0439453|NCI|||  
IU|[iU]|C0439453|||C0439453|NCI|||  
IU|idiopathic uveitis|||1|0.0319|  
IU|immunizing unit|||1|  
IU|in utero|C1708480|||1|  
IU|infectious unit|||1|  
IU|intermediate uveitis|C0042166|||1|0.0372|  
IU|international unit|C0439453|||C0439453|CHV;HL7V3.0;MTH;NCI;SNOMEDCT|||  
IU|international unit(s)|||C0439453|NCI|||  
IU|international units|C0439453|||C0439453|CHV;SNOMEDCT|1|0.7606|  
IU|international units (qualifier value)|||C0439453|SNOMEDCT|||  
IU|intrauterine|C0694756|||1|0.0638|1  
IU|iodouracil|C0063801|||C0063801|MSH|||  
IU|iu|C0439453|||C0439453|CHV|||

IU|ius|C0439453|||C0439453|CHV|||  
 IVC|individually viable cell|||||||1  
 IVC|indwelling venous catheter|||||||1  
 IVC|inferior vena  
 cava|C0042458;C1269024|1|0.998|C0042458;C1269024|CHV;FMA;MSH;NCI;SNOMEDCT;UWDA|1  
 |0.8943|1  
 IVC|inferior vena cavae|||||1|0.0103|  
 IVC|inferior vena caval|C0521360|||||1|0.0505|  
 IVC|inferior venacavogram|||||||1  
 IVC|inferior venacavograph|||||||1  
 IVC|inferior venacavography|||||||1  
 IVC|inspiratory vital capacity|C0429710|||C0429710|SNOMEDCT|1|0.0213|1  
 IVC|inspired vital capacity|||||||1  
 IVC|integrated vector control|||||||1  
 IVC|intravascular coagulation|||||||1  
 IVC|intravenous chemotherapy|C0413365|||||||1  
 IVC|intravenous  
 cholangiogram|C0203082;C1548869|||C0203082;C1548869|CHV;HL7V2.5;ICD9CM;MTH;SNOME  
 DCT|||1  
 IVC|intravenous cholangiograph|||||||1  
 IVC|intravenous cholangiography|C0203082|||C0203082|CHV|1|0.0237|1  
 IVC|intraventricular catheter|||||||1  
 IVC|intraventricular conduction|C0489574|||||||1  
 IVC|isovolumic contraction|C2923410|||||||1  
 IVF|Artificial Fertilization|C0015915|||C0015915|NCI|||  
 IVF|CDCD2|C1419864;C1832680|||C1419864|HUGO|||  
 IVF|CMPD2|C1413522;C1419864|||C1419864|HUGO|||  
 IVF|Fertilization in Vitro|C0015915|||C0015915|MSH;MTH|||  
 IVF|Fertilization in vitro|C0015915|||C0015915|LCH|||  
 IVF|Fertilization, Test-Tube|C0015915|||C0015915|MSH|||  
 IVF|Fertilizations in Vitro|C0015915|||C0015915|MSH|||  
 IVF|Fertilizations, Test-Tube|C0015915|||C0015915|MSH|||  
 IVF|HB1|C1419864;C1825768|||C1419864|HUGO|||  
 IVF|HB2|C1419864;C1825769|||C1419864|HUGO|||  
 IVF|HBBD|C1419864;C1879286|||C1419864|HUGO|||  
 IVF|HH1|C1419864|||C1419864|HUGO|||  
 IVF|ICCD|C1419864|||C1419864|HUGO|||  
 IVF|IVF|C0015915;C1419864|||C0015915;C1419864|CHV;CSP;HUGO;MEDLINEPLUS;NCI;SNOME  
 DCT|||  
 IVF|In Vitro  
 Fertilization|C0015915|||C0015915|ICD10PCS;MEDLINEPLUS;MSH;MTHCH;NCI|||  
 IVF|In Vitro Fertilizations|C0015915|||C0015915|MSH|||  
 IVF|In vitro fertilisation|C0015915|||C0015915|SNOMEDCT|||  
 IVF|In vitro fertilisation procedure|C0015915|||C0015915|SNOMEDCT|||  
 IVF|In vitro fertilisation procedure (procedure)|||C0015915|SNOMEDCT|||  
 IVF|In vitro fertilization|C0015915|||C0015915|SNOMEDCT|||  
 IVF|In vitro fertilization procedure|C0015915|||C0015915|SNOMEDCT|||  
 IVF|In-vitro fertilisation|C0015915|||C0015915|SNOMEDCT|||  
 IVF|In-vitro fertilization|C0015915|||C0015915|SNOMEDCT|||  
 IVF|LQT3|C1419864;C1859062|||C1419864|HUGO|||  
 IVF|NAV1.5|C1419864|||C1419864|OMIM|||  
 IVF|Nav1.5|C1419864|||C1419864|HUGO|||  
 IVF|Other Procedures @ Physiological Systems and Anatomical Regions @ Other  
 Procedures @ None @ External @ Other Method @ In Vitro  
 Fertilization|||C0015915|ICD10PCS|||  
 IVF|PFHB1|C1419864|||C1419864|HUGO|||  
 IVF|SCN5A|C1419864|||C1419864|HUGO;OMIM|||

IVF|SCN5A gene|C1419864|||C1419864|HUGO;LNC;MTH|||  
IVF|SODIUM CHANNEL, VOLTAGE-GATED, TYPE V, ALPHA  
SUBUNIT|C1121069;C1419864|||C1419864|OMIM|||  
IVF|SSS1|C1419864;C1425415;C1837845|||C1419864|HUGO|||  
IVF|Test Tube Fertilization|C0015915|||C0015915|MSH|||  
IVF|Test tube baby technique|C0015915|||C0015915|SNOMEDCT|||  
IVF|Test tube ovum fertilisation|C0015915|||C0015915|SNOMEDCT|||  
IVF|Test tube ovum fertilization|C0015915|||C0015915|SNOMEDCT|||  
IVF|Test tube ovum fertilization (procedure)|||C0015915|SNOMEDCT|||  
IVF|Test-Tube Fertilization|C0015915|||C0015915|MSH|||  
IVF|Test-Tube Fertilizations|C0015915|||C0015915|MSH|||  
IVF|artificial fertilization|C0015915|||C0015915|CSP|||  
IVF|fertilisation in vitro|C0015915|||C0015915|CHV|||  
IVF|fertilization in vitro|C0015915|||C0015915|CHV|1|0.0027|  
IVF|idiopathic ventricular fibrillation|C0340493|||C0340493|MSH;OMIM|1|0.0073|  
IVF|in vitro Fertilization|C0015915|||C0015915|NCI|||  
IVF|in vitro fertilisation|C0015915|||C0015915|CHV|||  
IVF|in vitro  
fertilization|C0015915|1|0.616|C0015915|CHV;CSP;ICD10PCS;MEDLINEPLUS;MSH;MTHCH;N  
CI;SNOMEDCT|||1  
IVF|in vitro fertilization (IVF)|||C0015915|CHV|||  
IVF|in vivo fertilization|C0232905|||1  
IVF|in-vitro fertilisation|C0015915|||1|0.0218|  
IVF|interventricular  
foramen|C0016520;C1281034|||C0016520;C1281034|CHV;FMA;NCI;SNOMEDCT;UWDA|||1  
IVF|intervertebral  
foramen|C0223085;C1281347|||C0223085;C1281347|CHV;FMA;SNOMEDCT;UWDA|||1  
IVF|intravascular fluid|||1  
IVF|intravenous fluid|C1289919|1|0.376|C1289919|CHV;NCI;SNOMEDCT|1|0.0045|1  
IVF|intravenous fluorescein|||1  
IVF|intravertebral foramen|||1  
IVF|long QT syndrome 3|C1419864;C1859062|||C1419864|HUGO|||  
IVF|sodium channel, voltage-gated, type V, alpha  
subunit|C1121069;C1419864|||C1419864|HUGO|||  
IVF|test-tube fertilization|C0015915|||C0015915|CHV|||  
IVF|vitro fertilisation|||1|0.066|  
IVF|vitro fertilization|||1|0.879|  
IVF|vitro fertilization and embryo transfer|||1|0.0032|  
IVF|vitro fertilized|||1|0.0155|  
IVIG|Antibodies, Intravenous|C0085297|||C0085297|MSH;NDFRT|||  
IVIG|GLOBULIN, IMMUNE (IV)|||C0085297|NDFRT;VANDF|||  
IVIG|IG IV|||C0085297|MSH|||  
IVIG|IGIV|C0085297;C1527233|||C0085297|HL7V2.5;HL7V3.0;MSH;SNOMEDCT|||  
IVIG|IV IG|||C0085297|MSH|||  
IVIG|IV Immunoglobulins|C0085297|||C0085297|MSH;NDFRT|||  
IVIG|IV immunoglobulin|C0085297|||C0085297|CHV|||  
IVIG|IVIG|C0085297|||C0085297|MSH;NDFRT|||  
IVIG|Immune Globulin IV|C0085297;C1527233|||C0085297|PDQ|||  
IVIG|Immune Globulin Intravenous|||C0085297|PDQ|||  
IVIG|Immune Globulin, Intravenous|C0085297|||C0085297|MSH;NDFRT|||  
IVIG|Immune globulin IV|C0085297;C1527233|||C0085297|SNOMEDCT|||  
IVIG|Immune globulin IV (product)|||C0085297|SNOMEDCT|||  
IVIG|Immune globulin IV (substance)|||C0085297|SNOMEDCT|||  
IVIG|Immunoglobulins, IV|C0085297|||C0085297|MSH|||  
IVIG|Immunoglobulins, Intravenous|C0085297|||C0085297|MSH;MTH;NDFRT;RXNORM|||  
IVIG|Immunoglobulins, Intravenous [Chemical/Ingredient]|||C0085297|NDFRT|||  
IVIG|Intravenous Antibodies|C0085297|||C0085297|MSH;NDFRT|||

IVIG|Intravenous IG|C0085297|||C0085297|MSH;NDFRT|||  
 IVIG|Intravenous Immune Globulin|C0085297|||C0085297|MSH|||  
 IVIG|Intravenous Immunoglobulins|C0085297|||C0085297|MSH;NDFRT|||  
 IVIG|Intravenous immunoglobulin|C0085297|||C0085297|SNOMEDCT|||  
 IVIG|Intravenous immunoglobulin (product)|||C0085297|SNOMEDCT|||  
 IVIG|Intravenous immunoglobulin (substance)|||C0085297|SNOMEDCT|||  
 IVIG|intravenous Ig|C0085297|||1|0.0052|  
 IVIG|intravenous IgG|||1|0.0082|  
 IVIG|intravenous gamma globulin|||1|0.0254|  
 IVIG|intravenous gammaglobulin|||1|0.0187|  
 IVIG|intravenous immune globulin|C0085297|1|1.000|C0085297|MSH|1|0.0951|1  
 IVIG|intravenous immunoglobulin|C0085297|||C0085297|CHV;SNOMEDCT|1|0.8054|  
 IVIG|intravenous immunoglobulin G|||1|0.0247|  
 IVIG|intravenous immunoglobulin preparations|||1|0.0075|  
 IVIG|intravenous immunoglobulin therapy|||1|0.0097|  
 IVIG|intravenous immunoglobulins|C0085297|||C0085297|CHV|||  
 IVP|Consent Type - IVP|C1548873|||C1548873|MTH|||  
 IVP|IVP|C0203108;C1548873|||C0203108;C1548873|HL7V2.5;NCI|||  
 IVP|IVP - Intravenous pyelogram|C0203108|||C0203108|SNOMEDCT|||  
 IVP|IVU - Intravenous urogram|C0203108|||C0203108|SNOMEDCT|||  
 IVP|Intravenous Pyelogram|C0203108|||C0203108|NCI|||  
 IVP|Intravenous Pyelography|C0203108|||C0203108|NCI|||  
 IVP|Intravenous pyelogram|C0203108|||C0203108|CCS;ICD9CM;MTH;SNOMEDCT|||  
 IVP|Intravenous pyelogram (procedure)|||C0203108|SNOMEDCT|||  
 IVP|Intravenous pyelogram without KUB|C0203108|||C0203108|SNOMEDCT|||  
 IVP|Intravenous pyelogram, NOS|C0203108|||C0203108|SNOMEDCT|||  
 IVP|Intravenous urogram|C0203108|||C0203108|SNOMEDCT|||  
 IVP|Intravenous urogram (procedure)|||C0203108|SNOMEDCT|||  
 IVP|Intravenous urography|C0203108|||C0203108|SNOMEDCT|||  
 IVP|Intravenous urography without KUB|C0203108|||C0203108|SNOMEDCT|||  
 IVP|Intravenous urography, NOS|C0203108|||C0203108|SNOMEDCT|||  
 IVP|Retired procedure (procedure) [P5-60030]|||C0203108|SNOMEDCT|||  
 IVP|Retired procedure [P5-60030]|||C0203108|SNOMEDCT|||  
 IVP|excretory urogram|||1|0.0458|  
 IVP|excretory urography|C0203108|||C0203108|CHV|1|0.1117|  
 IVP|intravascular pressure|||1|  
 IVP|intravenous push|C1319196|||C1319196|NCI;SNOMEDCT|||1  
 IVP|intravenous  
 pyelogram|C0203108|||C0203108|CCS;CHV;ICD9CM;MTH;NCI;SNOMEDCT|1|0.1748|1  
 IVP|intravenous pyelogram (IVP)|C0203108|||C0203108|CHV|||  
 IVP|intravenous pyelograph|1|1.000|||1  
 IVP|intravenous pyelography|C0203108|||C0203108|CHV;NCI|1|0.3095|1  
 IVP|intravenous urogram|C0203108|||C0203108|CHV|||  
 IVP|intravenous urography|C0203108|||C0203108|CHV|||  
 IVP|intraventricular pressure|C0206177|||C0206177|CHV;CSP;MSH|1|0.0974|1  
 IVP|intravesical pressure|C0232843|||1|0.0315|1  
 IVP|ivp|C0203108;C1548873|||C0203108|CHV|||  
 IVP|pyelogram|C0203108|||C0203108|CHV|||  
 IVP|pyelograms|C0203108|||C0203108|CHV|||  
 IVP|vitro embryo production|||1|0.0229|  
 IVP|vitro produced|||1|0.1547|  
 IVP|vitro production|||1|0.0516|  
 IV|CI|||C0022326|NCI|||  
 IV|CIV|||C0022326|NCI|||  
 IV|COTE D'IVOIRE|C0022326|||C0022326|NCI|||  
 IV|Cote d'Ivoire|C0022326|||C0022326|AOD;MSH;NCI;SNOMEDCT|||  
 IV|Fourth|C0205438;C1706303|||C1706303|NCI|||

IV|Fourth (suffix)|C1706303||C1706303|MTH|||  
IV|INTRAVENOUS|C0348016||C1522726|NCI|||  
IV|IV|||C0022326;C0348016;C0677510;C1416522;C1522726;C1706303|CHV;CSP;HUGO;LNC;  
NCI;SNOMEDCT|||  
IV|IV (qualifier value)|||C0677510|SNOMEDCT|||  
IV|IV - Intravenous|C0348016||C0348016|SNOMEDCT|||  
IV|IV - Intravenous infusion|C0021440||C0021440|SNOMEDCT|||  
IV|IV Infusion|C0021440||C0021440|NCI|||  
IV|IV gene|C1416522||C1416522|HUGO;MTH|||  
IV|IV route|C1522726||C1522726|SNOMEDCT|||  
IV|IV use|||C1522726|CHV;SNOMEDCT|||  
IV|IVI - Intavenous infusion|||C0021440|SNOMEDCT|||  
IV|IVI - Intravenous infusion|C0021440||C0021440|SNOMEDCT|||  
IV|Infusion, Intravenous|C0021440;C1272892;C1621368||C0021440|MSH|||  
IV|Infusions, Intravenous|C0021440||C0021440|MSH|||  
IV|Intravenous|C0348016||C0348016;C1522726|HL7V2.5;MTH;NCI;SNOMEDCT|||  
IV|Intravenous (qualifier value)|||C0348016|SNOMEDCT|||  
IV|Intravenous Infusion|C0021440;C1272892;C1621368||C0021440|MSH;NCI|||  
IV|Intravenous Infusions|C0021440||C0021440|MSH|||  
IV|Intravenous Route of Administration|C1522726||C1522726|NCI|||  
IV|Intravenous Route of Drug Administration|C1522726||C1522726|MTH|||  
IV|Intravenous infusion|C0021440;C1272892;C1621368||C0021440|SNOMEDCT|||  
IV|Intravenous infusion (procedure)|||C0021440|SNOMEDCT|||  
IV|Intravenous infusion procedures|C0021440||C0021440|MTH;SNOMEDCT|||  
IV|Intravenous infusion procedures (procedure)|||C0021440|SNOMEDCT|||  
IV|Intravenous infusion, NOS|C0021440;C1272892;C1621368||C0021440|SNOMEDCT|||  
IV|Intravenous injection|C0021494|||1|0.0063|  
IV|Intravenous route|C0205520;C1522726||C1522726|SNOMEDCT|||  
IV|Intravenous route (qualifier value)|||C1522726|SNOMEDCT|||  
IV|Intravenous use|C1522726||C1522726|SNOMEDCT|||  
IV|IntravenousRoute|C1522726||C1522726|HL7V3.0|||  
IV|Ivory Coast|C0022326||C0022326|AOD;LCH;MSH;MTH;NCI;SNOMEDCT|||  
IV|Ivory Coast (geographic location)|||C0022326|SNOMEDCT|||  
IV|On IV|C0677510||C0677510|HL7V2.5|||  
IV|Parenteral Infusion|C0021440;C0021441||C0021440|NCI|||  
IV|Parenteral Infusion Procedure|C0021440||C0021440|NCI|||  
IV|Republic of Cote diIvoire|C0022326||C0022326|MSH|||  
IV|Roman Numeral IV|C0677510||C0677510|MTH|||  
IV|Roman numeral IV|C0677510||C0677510|SNOMEDCT|||  
IV|Roman numeral IV (qualifier value)|||C0677510|SNOMEDCT|||  
IV|SIV|||C1416522|HUGO|||  
IV|administered intravenously|||1|0.0436|  
IV|administration intravenous|||C0021440|CHV|||  
IV|coast ivory|C0022326||C0022326|CHV|||  
IV|cote d'ivoire|C0022326||C0022326|CHV|||  
IV|ichnovirus|C0999783||C0999783|NCBI|||  
IV|ichthyosis  
vulgaris|C0079584||C0079584|CHV;MSH;MTH;NCI;NDFRT;OMIM;SNOMEDCT|||1  
IV|immunodeficiency virus|C0682458|||1|  
IV|in  
vitro|C0021135;C1533691;C2827718||C0021135;C1533691;C2827718|CHV;MSH;MTH;NCI|||  
1  
IV|in vivo|C1515655||C1515655|CHV;NCI|||1  
IV|infusion intravenous|||C0021440|CHV|||  
IV|injections|C0021485;C1533685|||1|0.0029|  
IV|inserted into the vein (IV)|||C0348016|CHV|||  
IV|interventricular|||1|

IV|intervertebral|C0442106|||C0442106|CHV;SNOMEDCT|||1  
IV|interview|C0021822;C0935630|||1  
IV|intravaginal|C0442122|||C0442122|CHV;NCI;SNOMEDCT|||1  
IV|intravascular|C0442123|||1  
IV|intravenous|C0348016|1|0.970|C0348016;C1522726|CHV;HL7V2.5;MTH;NCI;SNOMEDCT|1  
|0.9365|1  
IV|intravenous (IV)|C0348016|||C0348016|CHV|||  
IV|intravenous administration|C0013125;C0021440|||C0021440|CHV|1|0.0034|  
IV|intravenous feeding|C0021910|||C0021910|CHV;CSP;MSH;MTH;SNOMEDCT|||  
IV|intravenous infusion|C0021440;C1272892;C1621368|||C0021440|CHV|1|0.0032|  
IV|intravenous infusions|C0021440|||C0021440|CHV|||  
IV|intravenous injection|C0021494|||C0021494|AOD;CHV;MSH;NCI;SNOMEDCT|||  
IV|intravenous use|C1522726|||C1522726|CHV|||  
IV|intravenous uses|C1522726|||C1522726|CHV|||  
IV|intravenously|||1  
IV|intraventricular|C1517569|||C1517569;C1517571|MTH;NCI;SNOMEDCT|||1  
IV|intravertebral|||1  
IV|invasive|C0205281|||C0205281|CHV;LNC;MTH;NCI;SNOMEDCT|||1  
IV|inversion|C0021943;C0021945;C1705687;C2349984|||1  
IV|inversus situs, viscerum|C1416522|||C1416522|HUGO|||  
IV|iodine value|||1  
IV|iridovirus|C0206467|||C0206467|MSH;NCBI;SNOMEDCT|||  
IV|iv|||C0021440|CHV|||  
IV|iv route|C1522726|||C1522726|CHV|||  
IV|iv uses|||C1522726|CHV|||  
IV|ivory coast|C0022326|||C0022326|CHV|||  
IV|jugular vein|C0022427;C1280188|||1|0.0019|  
IV|systemically|||1|0.0022|  
IV|vein infusion|C0021440;C1621368|||C0021440|CHV|||  
JP|Aggressive Periodontitis|C0031106|||C0031106|MSH;NDFRT|||  
JP|Aggressive Periodontitis [Disease/Finding]|||C0031106|NDFRT|||  
JP|Circumpubertal Periodontitis|C0031106|||C0031106|MSH|||  
JP|Early-Onset Periodontitis|C0031106;C0399447|||C0031106|MSH;NDFRT|||  
JP|JA|||C0022341|NCI|||  
JP|JAPAN|C0022341|||C0022341|NCI|||  
JP|JP|C0022341;C0031106;C1421124|||C0022341;C0031106;C1421124|HUGO;NCI;OMIM|||  
JP|JP - Juvenile periodontitis|C0031106|||C0031106|SNOMEDCT|||  
JP|JPD|C0031106;C0268414;C1416530|||C0031106|OMIM|||  
JP|JPD - Juvenile periodontitis|C0031106|||C0031106|SNOMEDCT|||  
JP|JPN|C0022341|||C0022341|NCI|||  
JP|Jackson-Pratt|||1|1.000|||1  
JP|Japan|C0022341|||C0022341|AOD;CHV;CSP;LCH;MSH;MTH;NCI;SNOMEDCT|||  
JP|Japan (geographic location)|||C0022341|SNOMEDCT|||  
JP|Jobst pump|||1  
JP|Juvenile Periodontitis|C0031106;C1416530|||C0031106|MSH;NDFRT|||  
JP|Juvenile papillomatosis|||1|0.0565|  
JP|Juvenile periodontitis|C0031106;C1416530|||C0031106|SNOMEDCT|||  
JP|Juvenile periodontitis (disorder)|||C0031106|SNOMEDCT|||  
JP|PERIODONTITIS, AGGRESSIVE, 1|C0031106|||C0031106|OMIM|||  
JP|PERIODONTITIS, JUVENILE|C0031106;C1416530|||C0031106|OMIM|||  
JP|PERIODONTITIS, PREPUBERTAL|C0031106|||C0031106|OMIM|||  
JP|PPP|C0031106;C0370219|||C0031106|OMIM|||  
JP|Paradentosis|C0031106|||C0031106|SNOMEDCT|||  
JP|Periodontitis, Aggressive|C0031106|||C0031106|MSH|||  
JP|Periodontitis, Circumpubertal|C0031106|||C0031106|MSH;NDFRT|||  
JP|Periodontitis, Juvenile|C0031106;C1416530|||C0031106|MSH;MTH;NDFRT|||  
JP|Periodontitis, Prepubertal|C0031106|||C0031106|MSH;NDFRT|||

JP|Periodontosis|C0031106;C0600298|||C0031106|SNOMEDCT|||  
 JP|Prepubertal Periodontitis|C0031106|||C0031106|MSH;NDFRT|||  
 JP|Prepubertal periodontitis|C0031106|||C0031106|SNOMEDCT|||  
 JP|Prepubertal periodontitis (disorder)|||C0031106|SNOMEDCT|||  
 JP|T cell receptor gamma joining P|C1421124|||C1421124|HUGO|||  
 JP|T-cell receptor, gamma, joining segment JP|||C1421124|HUGO|||  
 JP|TRGJP|C1421124|||C1421124|HUGO|||  
 JP|TRGJP gene|C1421124|||C1421124|HUGO;MTH|||  
 JP|jimpy|||||1|0.1695|  
 JP|joining peptide|||||1|0.0678|  
 JP|joint protection|||||1|  
 JP|juvenile parkinsonism|C0752105|||||1|0.1017|  
 JP|juvenile  
 periodontitis|C0031106;C1416530|||C0031106;C1416530|CHV;CSP;HUGO;MSH;NDFRT;SNOME  
 DCT|1|0.452|1  
 JP|juvenile polyposis|C0345893|||C0345893|NCI|1|0.096|1  
 JP|paradentosis|C0031106|||C0031106|CHV|||  
 JP|periodontosis|C0031106;C0600298|||C0031106|CHV|||  
 JP|psychotropic drugs in Japanese pharmacopoeia|||||1|0.0565|  
 JVD|JUGULAR VENOUS DISTENTION|C0425687|||C0425687|DXP|||  
 JVD|JVD|C0425687|||C0425687|DXP|||  
 JVD|Jugular venous distension|C0425687|||C0425687|SNOMEDCT|||  
 JVD|Jugular venous engorgement|C0425687|||C0425687|SNOMEDCT|||  
 JVD|Jugular venous engorgement (finding)|||C0425687|SNOMEDCT|||  
 JVD|Venous congestion of neck|C0425687|||C0425687|SNOMEDCT|||  
 JVD|jugular venous distention|C0425687|1|1.000|C0425687|CHV;DXP|||1  
 JVD|jvd|C0425687|||C0425687|CHV|||  
 JVP|jugular vein pulse|||||1|  
 JVP|jugular venous pressure|C0428897|1|1.000|C0428897|CHV;SNOMEDCT|1|1|1  
 JVP|jugular venous pulsation|||||1|  
 JVP|jugular venous pulse|C0232133|||C0232133|SNOMEDCT|||1  
 KBC|knowledge based charting||1|1.000|||1|  
 KCL|high potassium|C0856882|||||1|0.022|  
 KCL|potassium chloride|C0032825|1|1.000|||1|0.978|1  
 KUB|KUB|C1979912|||C1979912|LNC|||  
 KUB|Kidney-Ureter-Bladder|C1979912|||C1979912|MTH|||  
 KUB|kidney ultrasound biopsy|||||1|  
 KUB|kidneys and urinary bladder|||||1|  
 KUB|kidneys, ureters, bladder||1|1.000|||1|  
 L1|IGKV1-16|C1416177|||C1416177|HUGO|||  
 L1|IGKV1-16 gene|C1416177|||C1416177|HUGO;MTH|||  
 L1|IGKV116|C1416177|||C1416177|HUGO|||  
 L1|L1|C0441918;C1179698;C1416177|||C0441918;C1179698;C1416177|FMA;HUGO;NCI;SNOME  
 DCT;UWDA|||  
 L1|L1 Cancer Stage Finding|C0441918|||C0441918|NCI|||  
 L1|L1 Lymphatic Invasion Finding|C0441918|||C0441918|NCI|||  
 L1|L1 Lymphatic Stage|C0441918|||C0441918|NCI|||  
 L1|L1 Lymphatic Vessel Invasion Finding|C0441918|||C0441918|NCI|||  
 L1|L1 Stage|C0441918|||C0441918|NCI|||  
 L1|L1 Stage Finding|C0441918|||C0441918|NCI|||  
 L1|L1 TNM Finding|C0441918|||C0441918|NCI|||  
 L1|L1 innervation|C1179698|||C1179698|MTH|||  
 L1|L1 stage|C0441918|||C0441918|MTH;SNOMEDCT|||  
 L1|L1 stage (finding)|C0441918|||C0441918|SNOMEDCT|||  
 L1|L1 stage (tumor staging)|||C0441918|SNOMEDCT|||  
 L1|L1: lymphatic vessel invasion|||C0441918|SNOMEDCT|||  
 L1|LINE-1|||||1|0.2912|

L1|Lymphatic Stage L1|C0441918|||C0441918|NCI|||  
L1|Lymphatic stage L1|C0441918|||C0441918|SNOMEDCT|||  
L1|Lymphatic stage L1 (tumor staging)|||C0441918|SNOMEDCT|||  
L1|deferiprone|C0043832|||C0043832|CHV;MSH;MTH;NCI;RXNORM;SNOMEDCT|||  
L1|first|C0205435;C1279901|||1|0.0769|  
L1|first language|C0557073|||C0557073|SNOMEDCT|1|0.1209|  
L1|first larval stage|||1|0.044|  
L1|first lumbar vertebra|C0223492|||C0223492|FMA;MTH;SNOMEDCT;UWDA|||  
L1|first-stage larvae|||1|0.1264|  
L1|immunoglobulin kappa variable 1-16|C1416177|||C1416177|HUGO|||  
L1|iron chelator deferiprone|||1|0.0934|  
L1|lumbar (level) 1||1|1.000|||  
L1|lymphatic invasion|C1708790|||1|  
L1|major|C0205164|||1|0.0495|  
L1|major capsid protein|||1|0.0659|  
L1|native language|C1510558|||1|0.0549|  
L1|oral iron chelator 1,2-dimethyl-3-hydroxypyrid-4-one|||1|0.0769|  
L2|L2|C1179699;C1418789;C1825810|||C0332411;C1179699;C1418789;C1825810|FMA;HUGO;OMIM;SNOMEDCT;UWDA|||  
L2|L2 innervation|C1179699|||C1179699|MTH|||  
L2|L2 stage|C0332411|||C0332411|MTH;SNOMEDCT|||  
L2|L2 stage (finding)|||C0332411|SNOMEDCT|||  
L2|L2 stage (tumor staging)|||C0332411|SNOMEDCT|||  
L2|LGICZ|C1825810|||C1825810|HUGO|||  
L2|LGICZ1|C1825810|||C1825810|OMIM|||  
L2|LIGAND-GATED ION CHANNEL, ZINC-ACTIVATED, 1|||C1825810|OMIM|||  
L2|LIPRIN-BETA-1|C1418789|||C1418789|OMIM|||  
L2|PPFIBP1|C1418789|||C1418789|HUGO;OMIM|||  
L2|PPFIBP1 gene|C1418789|||C1418789|HUGO;MTH|||  
L2|PROTEIN-TYROSINE PHOSPHATASE, RECEPTOR-TYPE, F POLYPEPTIDE-INTERACTING PROTEIN-BINDING PROTEIN 1|C1418789|||C1418789|OMIM|||  
L2|PTPRF interacting protein, binding protein 1 (liprin beta 1)|||C1418789|HUGO|||  
L2|PTPRF-INTERACTING PROTEIN-BINDING PROTEIN 1|C1418789|||C1418789|OMIM|||  
L2|SGT2|C1418789;C1428131|||C1418789|HUGO|||  
L2|ZAC|C1335223;C1709407;C1825810|||C1825810|HUGO;OMIM|||  
L2|ZAC1|C1335223;C1709407;C1825810|||C1825810|HUGO|||  
L2|ZACN|C1825810|||C1825810|HUGO|||  
L2|ZACN gene|C1825810|||C1825810|HUGO;MTH|||  
L2|Zn(2+)-ACTIVATED CHANNEL|||C1825810|OMIM|||  
L2|cell line|C0007600|||1|0.1846|  
L2|hSGT2|C1418789|||C1418789|HUGO|||  
L2|hSgt2p|C1418789|||C1418789|HUGO|||  
L2|lumbar (level) 2||1|1.000|||  
L2|second language|C0557074|||C0557074|CHV;SNOMEDCT|1|0.5538|  
L2|second lumbar|||1|0.0769|  
L2|second lumbar (l2) nerve|||C1179699|CHV|||  
L2|second lumbar vertebra|C0223507|||C0223507|FMA;MTH;SNOMEDCT;UWDA|||  
L2|second-stage larvae|||1|0.1846|  
L2|zinc activated ligand-gated ion channel|||C1825810|HUGO|||  
L3|CerS2|C1422392|||C1422392|HUGO|||  
L3|FLJ10243|C1422392|||C1422392|HUGO|||  
L3|L3|C1179700;C1419655;C1422392|||C1179700;C1419655;C1422392|FMA;HUGO;UWDA|||  
L3|L3 innervation|C1179700|||C1179700|MTH|||  
L3|LAG1 homolog, ceramide synthase 2|C1422392|||C1422392|HUGO|||  
L3|LAG1, S. CEREVISIAE, HOMOLOG OF, 2|||C1422392|OMIM|||  
L3|LASS2|C1422392|||C1422392|HUGO;OMIM|||

L3|LASS2 gene|C1422392|||C1422392|HUGO;MTH|||  
L3|RIBOSOMAL PROTEIN L3|C0073294;C1419655|||C1419655|OMIM|||  
L3|RPL3|C1419655|||C1419655|HUGO;OMIM|||  
L3|RPL3 gene|C1419655|||C1419655|HUGO;MTH|||  
L3|SP260|C1422392|||C1422392|HUGO|||  
L3|infective|||||1|0.0571|  
L3|infective larvae|||||1|0.4318|  
L3|infective larval|||||1|0.0174|  
L3|infective stage larvae|||||1|0.0323|  
L3|infective third-stage|||||1|0.0099|  
L3|infective third-stage larvae|||||1|0.0943|  
L3|larva|C0023047|||||1|0.0397|  
L3|level 3|C0456949|||C0456949|CHV;SNOMEDCT|||  
L3|lumbar (level) 3|||1|1.000|||  
L3|lumbar vertebra|C0024091;C1269051|||||1|0.0273|  
L3|ribosomal protein L3|C0073294;C1419655|||C1419655|HUGO|||  
L3|third|C0205437|||||1|0.072|  
L3|third larval stage|||||1|0.0199|  
L3|third lumbar (l3) nerve|||C1179700|CHV|||  
L3|third lumbar vertebra|C0223522|||C0223522|FMA;MTH;SNOMEDCT;UWDA|||  
L3|third stage|C0441771|||||1|0.0273|  
L3|third stage larvae|||||1|0.1712|  
L4|60S ribosomal protein L4|C1419676|||C1419676|HUGO|||  
L4|Fourth-stage larvae|||||1|0.5842|  
L4|L4|C1419676|||C1179701;C1419676|FMA;HUGO;UWDA|||  
L4|L4 Segmental Innervation|C1179701|||C1179701|MTH|||  
L4|RIBOSOMAL PROTEIN L4|C0073302;C1419676|||C1419676|OMIM|||  
L4|RPL4|C1419676|||C1419676|HUGO;OMIM|||  
L4|RPL4 gene|C1419676|||C1419676|HUGO;MTH|||  
L4|fourth larval stage|||||1|0.0693|  
L4|fourth lumbar|||||1|0.099|  
L4|fourth lumbar vertebra|C0223537|||C0223537|CHV;FMA;MTH;SNOMEDCT;UWDA|||  
L4|fourth-stage|||||1|0.1881|  
L4|layer 4|||||1|0.0594|  
L4|lumbar (level) 4|||1|1.000|||  
L4|ribosomal protein L4|C0073302;C1419676|||C1419676|HUGO|||  
L5|5th lumbar vertebra nerves|C1179702|||C1179702|CHV|||  
L5|Bone structure of L5|C0223552|||C0223552|SNOMEDCT|||  
L5|Bone structure of L5 (body structure)|||C0223552|SNOMEDCT|||  
L5|FLJ32011|C1969618|||C1969618|HUGO|||  
L5|Fifth lumbar vertebra|C0223552|||C0223552|FMA;MTH;SNOMEDCT;UWDA|||  
L5|KINO|C1011810;C1969618|||C1969618|HUGO;OMIM|||  
L5|KINOCILIN|C1969618|||C1969618|OMIM|||  
L5|KNCN|C1969618|||C1969618|HUGO;OMIM|||  
L5|KNCN gene|C1969618|||C1969618|HUGO;MTH|||  
L5|L5|C1419683;C1969618|||C1179702;C1419683;C1969618|FMA;HUGO;OMIM;UWDA|||  
L5|L5 Segmental Innervation|C1179702|||C1179702|MTH|||  
L5|L5 VERTEBRA|C0223552;C1305617|||C0223552|NCI|||  
L5|L5 Vertebra|C0223552;C1305617|||C0223552|NCI|||  
L5|L5 vertebra|C0223552;C1305617|||C0223552|FMA;UWDA|||  
L5|RIBOSOMAL PROTEIN L5|C0073304;C1419683|||C1419683|OMIM|||  
L5|RPL5|C1419683|||C1419683|HUGO;OMIM|||  
L5|RPL5 gene|C1419683|||C1419683|HUGO;MTH|||  
L5|fifth lumbar|||||1|0.4167|  
L5|fifth lumbar vertebra|C0223552|||C0223552|CHV;FMA;MTH;SNOMEDCT;UWDA|||  
L5|kinocilin|C1969618|||C1969618|HUGO|||  
L5|l5|C1419683;C1969618|||C0223552|CHV|||

L5|15 vertebra|C0223552;C1305617|||C0223552|CHV|||  
L5|lumbar (level) 5||1|0.998|||  
L5|lumbar vertebra|C0024091;C1269051|||1|0.5833|  
L5|ribosomal protein L5|C0073304;C1419683|||C1419683|HUGO|||  
LAD|Anterior descending branch of left coronary artery|C0226032|||C0226032|FMA;MTH;SNOMEDCT|||  
LAD|Anterior interventricular branch of left coronary artery|C0226032|||C0226032|FMA;UWDA|||  
LAD|Anterior interventricular coronary artery|C0226032|||C0226032|FMA;UWDA|||  
LAD|BRANCHED CHAIN ALPHA-KETO ACID DEHYDROGENASE COMPLEX, E3 COMPONENT|C1414063|||C1414063|OMIM|||  
LAD|CD18|||C1706333|NCI|||  
LAD|DIAPHORASE|C0023783;C1414063|||C1414063|OMIM|||  
LAD|DIHYDROLIPOAMIDE DEHYDROGENASE|C0023783;C1414063|||C1414063|OMIM|||  
LAD|DIHYDROLIPOYL DEHYDROGENASE|C0023783;C1414063|||C1414063|OMIM|||  
LAD|DLD|C1414063;C2826331|||C1414063|HUGO;OMIM|||  
LAD|DLD gene|C1414063|||C1414063|HUGO;MTH|||  
LAD|DLDH|C1414063|||C1414063|HUGO|||  
LAD|E3|||C1414063|OMIM|||  
LAD|E3 component of pyruvate dehydrogenase complex, 2-oxo-glutarate complex, branched chain keto acid dehydrogenase complex|||C1414063|HUGO|||  
LAD|GCSL|C1414063|||C1414063|OMIM|||  
LAD|GLYCINE CLEAVAGE SYSTEM L PROTEIN|C1414063|||C1414063|OMIM|||  
LAD|ITGB2 wt Allele|C1706333|||C1706333|MTH;NCI|||  
LAD|Integrin, Beta 2 (Antigen CD18 (p95), Lymphocyte Function-Associated Antigen 1; Macrophage Antigen 1 (MAC-1) Beta Subunit) wt Allele|||C1706333|NCI|||  
LAD|LAD|||C0226032;C0398738;C1414063;C1706333|FMA;NCI;OMIM|||  
LAD|LAD - Leucocyte adhesion deficiency type 1|C0398738|||C0398738|SNOMEDCT|||  
LAD|LAD - Leukocyte adhesion deficiency type 1|C0398738|||C0398738|SNOMEDCT|||  
LAD|LAD-Type I|C0398738|||C0398738|NCI|||  
LAD|LAD1|C0398738;C1416770|||C0398738|OMIM|||  
LAD|LCAMB|C1706333|||C1706333|NCI|||  
LAD|LDA|||C0226032|UWDA|||  
LAD|LEFT ANTERIOR DESCENDING CORONARY ARTERY|C0226032|||C0226032|HCPCS|||  
LAD|LEUKOCYTE ADHESION DEFICIENCY, TYPE I|C0398738|||C0398738|OMIM|||  
LAD|LFA-1|C0079717|||C1706333|NCI|||  
LAD|LFA-1 deficiency|C0398738|||C0398738|SNOMEDCT|||  
LAD|LFA-I Deficiency|C0398738|||C0398738|NCI|||  
LAD|LFA1 IMMUNODEFICIENCY|C0398738|||C0398738|OMIM|||  
LAD|LIPOAMIDE DEHYDROGENASE|C0023783;C1414063|||C1414063|OMIM|||  
LAD|LIPOAMIDE REDUCTASE|C1414063|||C1414063|OMIM|||  
LAD|LIPOYL DEHYDROGENASE|C0023783;C1414063|||C1414063|OMIM|||  
LAD|LYMPHOCYTE FUNCTION-ASSOCIATED ANTIGEN 1 IMMUNODEFICIENCY|C0398738|||C0398738|OMIM|||  
LAD|Left ant des coronary artery|||C0226032|HCPCS|||  
LAD|Left anterior descending artery|C0226032|||C0226032|SNOMEDCT|||  
LAD|Left anterior descending branch of left coronary artery|C0226032|||C0226032|FMA;UWDA|||  
LAD|Leucocyte adhesion deficiency - type 1|C0398738|||C0398738|SNOMEDCT|||  
LAD|Leucocyte adhesion molecule deficiency - type 1|C0398738|||C0398738|SNOMEDCT|||  
LAD|Leukocyte Adhesion Deficiency Type 1|C0398738|||C0398738|NCI|||  
LAD|Leukocyte adhesion deficiency|C0272187|||1|0.0247|  
LAD|Leukocyte adhesion deficiency - type 1|C0398738|||C0398738|SNOMEDCT|||  
LAD|Leukocyte adhesion deficiency - type 1 (disorder)|||C0398738|SNOMEDCT|||  
LAD|Leukocyte adhesion deficiency type 1|C0398738|||C0398738|MSH;MTH|||

LAD|Leukocyte adhesion molecule deficiency - type  
1|C0398738|||C0398738|SNOMEDCT|||  
LAD|Lipoamide dehydrogenase|C0023783;C1414063|||1|0.0033|  
LAD|Lymphocyte function-associated antigen 1  
immunodeficiency|C0398738|||C0398738|MSH|||  
LAD|MF17|C1706333|||C1706333|NCI|||  
LAD|Mo-1 deficiency|C0398738|||C0398738|SNOMEDCT|||  
LAD|PHE3|C1414063|||C1414063|OMIM|||  
LAD|PYRUVATE DEHYDROGENASE COMPONENT E3|C1414063|||C1414063|OMIM|||  
LAD|Ramus interventricularis anterior (Arteria coronaria  
sinistra)|||C0226032|FMA|||  
LAD|Structure of anterior descending branch of left coronary  
artery|C0226032|||C0226032|SNOMEDCT|||  
LAD|Structure of anterior descending branch of left coronary artery (body  
structure)|||C0226032|SNOMEDCT|||  
LAD|dihydrolipoamide dehydrogenase|C0023783;C1414063|||C1414063|HUGO|||  
LAD|lactate dehydrogenase|C0022917|||1|  
LAD|lactic acid dehydrogenase|C0022917|||C0022917|AOD;CHV;CSP;NCI;SNOMEDCT|||  
LAD|language acquisition device|||1|  
LAD|lda|||C0226032|CHV|||  
LAD|left anterior descending||1|0.992||1|0.2986|1  
LAD|left anterior descending artery|C0226032|||C0226032|CHV;SNOMEDCT|1|0.2051|  
LAD|left anterior descending branch|||1|0.0075|  
LAD|left anterior descending coronary|||1|0.0081|  
LAD|left anterior descending coronary artery|C0226032|||C0226032|HCPCS|1|0.395|  
LAD|left atrial defect|||1|  
LAD|left atrial diameter|||1|0.0114|1  
LAD|left atrial dilation||1|0.002|||  
LAD|left atrial dimension|||1|0.0124|1  
LAD|left axis deviation|C0232297|||C0232297|CHV;SNOMEDCT|1|0.0075|1  
LAD|leukocyte adhesion deficiency|C0272187|||C0272187|CHV;NCI;SNOMEDCT|||  
LAD|ligament augmentation device|||1|0.0091|1  
LAD|ligamentous anterior dislocation|||1|  
LAD|linear A disease|||1|  
LAD|linear IgA bullous dermatosis|C0406650|||1|0.002|  
LAD|linear IgA dermatosis|C0406650|||1|0.0033|  
LAD|linear IgA disease|C0406650|||1|0.012|  
LAD|linoleic acid depression|||1|  
LAD|lipoamide  
dehydrogenase|C0023783;C1414063|||C0023783;C1414063|MSH;NDFRT;OMIM|||1  
LAD|lymphadenopathy|C0497156|1|0.006|||  
LAD|lymphocyte-activating determinant|C0019754;C0302291|||1|  
LA|AUTOANTIGEN La|C1420423|||C1420423|OMIM|||  
LA|Agglutination Test, Latex|C0023117|||C0023117|MSH|||  
LA|Agglutination Tests, Latex|C0023117|||C0023117|MSH|||  
LA|Fixation Test, Latex|C0023117|||C0023117|MSH|||  
LA|Fixation Tests, Latex|C0023117|||C0023117|MSH|||  
LA|L-arginine|C0003765|||1|0.0044|  
LA|LA|||C0023034;C0023117;C0024024|LNC;NCI|||  
LA|LA - Latex agglutination|C0023117|||C0023117|SNOMEDCT|||  
LA|LAO|C0023034|||C0023034|NCI|||  
LA|LAO PEOPLE'S DEMOCRATIC REPUBLIC|C0023034|||C0023034|NCI|||  
LA|LARP3|C1420423|||C1420423|HUGO;OMIM|||  
LA|La|||C1420423|HUGO|||  
LA|La RIBONUCLEOPROTEIN DOMAIN FAMILY, MEMBER 3|C1420423|||C1420423|OMIM|||  
LA|La ribonucleoprotein domain family, member 3|C1420423|||C1420423|HUGO|||  
LA|Lanthanum|C0023031|||1|0.0153|

LA|Lao People's Democratic Republic|C0023034|||C0023034|NCI|||  
LA|Laos|C0023034|||C0023034|AOD;LCH;MSH;MTH;NCI;SNOMEDCT|||  
LA|Laos (geographic location)|||C0023034|SNOMEDCT|||  
LA|Laparoscopic adrenalectomy|C0521267|||1|0.0102|  
LA|Latex Agglutination Test|C0023117|||C0023117|MSH|||  
LA|Latex Agglutination Tests|C0023117|||C0023117|MSH|||  
LA|Latex Fixation Test|C0023117|||C0023117|MSH|||  
LA|Latex Fixation Tests|C0023117|||C0023117|MSH;MTH|||  
LA|Latex agglutination|C0023117|||C0023117|HL7V3.0;SNOMEDCT|||  
LA|Latex agglutination test|C0023117|||C0023117|SNOMEDCT|||  
LA|Latex agglutination test (procedure)|||C0023117|SNOMEDCT|||  
LA|Latex agglutination test, NOS|C0023117|||C0023117|SNOMEDCT|||  
LA|Los Angeles|C0024015|1|0.080|||1|0.0071|1|  
LA|Louisiana|C0024024|1|0.004|C0024024|AOD;LCH;MSH;NCI;SNOMEDCT|||  
LA|Louisiana (geographic location)|C0024024|||C0024024|MTH;SNOMEDCT|||  
LA|Ludwig angina|C0024081|||1|  
LA|Lyme arthritis|C0242381|||1|0.0048|  
LA|SJOJREN SYNDROME ANTIGEN B|C1420423|||C1420423|OMIM|||  
LA|SSB|C1167121;C1420423|||C1420423|HUGO;OMIM|||  
LA|SSB gene|C1420423|||C1420423|HUGO;MTH|||  
LA|Sjogren syndrome antigen B (autoantigen La)|||C1420423|HUGO|||  
LA|Test, Latex Agglutination|C0023117|||C0023117|MSH|||  
LA|Test, Latex Fixation|C0023117|||C0023117|MSH|||  
LA|Tests, Latex Agglutination|C0023117|||C0023117|MSH|||  
LA|Tests, Latex Fixation|C0023117|||C0023117|MSH|||  
LA|agglutination latex|C0023117|||C0023117|CHV|||  
LA|agglutination latex tests|||C0023117|CHV|||  
LA|alpha-lactalbumin|C0002287;C1442889|||1|0.0082|  
LA|alpha-lipoic acid|C0023791|||C0023791|CHV;MSH;NCI;NDFRT;PDQ;SNOMEDCT;VANDF|||  
LA|anti-SS-B|||1|0.0037|  
LA|antibodies|C0003241|||1|0.0031|  
LA|blood lactate|||1|0.0231|  
LA|blood lactate concentration|||1|0.0037|  
LA|labial|C0023759|||1|  
LA|lactalbumin|C0022912|||C0022912|CHV;CSP;LNC;MSH;NDFRT;SNOMEDCT|||  
LA|lactate|C0022924;C0376261|||C0022924;C0202115;C0376261|AOD;CHV;CSP;LNC;MSH;MTH;NCI;NDFRT;RXNORM;SNOMEDCT;VANDF|||  
LA|lactate concentration|||1|0.0153|  
LA|lactic acid|C0064582|||C0064582;C0202115|AOD;CHV;MSH;MTH;MTHSPL;NCI;NDFRT;RXNORM;SNOMEDCT;VANDF|1|0.0384|1|  
LA|lactic acidemia|C0347959;C1855560|||C0347959|CHV;CSP;OMIM;SNOMEDCT|||  
LA|lactic acidosis|C0001125|||C0001125|AOD;CHV;CSP;CST;DXP;MSH;MTHICD9;NDFRT;OMIM;SNOMEDCT|1|0.0034|  
LA|lactide|C0293984|||C0293984|MSH|||  
LA|lambert|C1551092|||1|  
LA|laminin|C0022984|||C0022984|AOD;CHV;CSP;FMA;MSH;MTH;NCI;NDFRT;UWDA|1|0.0037|  
LA|language age|||1|  
LA|lanthanum|C0023031|||1|  
LA|laos|C0023034|||C0023034|CHV|||  
LA|laparoscopic|C0031150;C0393360|||1|0.0034|  
LA|laparoscopic adrenalectomy|C0521267|||C0521267|CHV;SNOMEDCT|||1|  
LA|laparoscopic appendectomy|C0372525|||C0372525|CHV;ICD9CM;NCI;SNOMEDCT|1|0.0204|1|  
LA|laparoscopic appendicectomy|C0372525|||C0372525|CHV;SNOMEDCT|||  
LA|lard|C0064658|||C0064658;C1420806|CHV;HUGO;MSH;MTH;OMIM;SNOMEDCT|||

LA|large aggregates|||||1|0.0024|  
LA|large amount|||||1|  
LA|large aspiny|||||1|0.0031|  
LA|large surfactant aggregates|||||1|0.0024|  
LA|laser ablation|C0348007|||C0348007|CHV;MSH;MTH;SNOMEDCT|1|0.0041|  
LA|laser angioplasty|C0078950|||C0078950|CHV;CSP;MSH|||1|  
LA|late abortion|C0948496|||C0948496|CHV|||1|  
LA|late antigen|||||1|0.0048|1|  
LA|lateral|C0205093|||C0205093|CHV;FMA;HL7V2.5;LNC;MTH;NCI;SNOMEDCT;UWDA|1|0.0065|  
LA|lateral amygdala|||||1|0.0109|  
LA|lateral apical|||||1|  
LA|lateral nucleus|||||1|0.0027|  
LA|lateral nucleus of the amygdala|||||1|0.0099|  
LA|latex agglutination|C0023117|||C0023117|CHV;HL7V3.0;SNOMEDCT|1|0.0526|1|  
LA|latex agglutination test|C0023117|||C0023117|CHV|1|0.0054|  
LA|latex agglutination tests|C0023117|||C0023117|CHV|||  
LA|latex fixation test|C0023117|||C0023117|AOD;CHV;CSP|||  
LA|latex particle agglutination test|C0023117|||C0023117|AOD|||  
LA|lauric acid|C0023139|||C0023139|AOD;CHV;LCH;MSH;NCI;SNOMEDCT|||  
LA|lead acetate|C0064711|||C0064711|CHV;MSH;NDFRT;SNOMEDCT;VANDF|||  
LA|left angle|||||1|  
LA|left angulation|||||1|  
LA|left  
arm|C0230347;C1268256|||C0230347;C1268256|CHV;FMA;HL7V2.5;SNOMEDCT;UWDA|||1|  
LA|left atria|||||1|0.0044|  
LA|left atrial||1|0.060||1|0.1647|1|  
LA|left  
atrium|C0225860;C1269894|||C0225860;C1269894|AOD;CHV;FMA;MSH;NCI;SNOMEDCT;UWDA|1|0.0761|1|  
LA|left auricle|C0225861|||C0225861|CHV;FMA;UWDA|||1|  
LA|leucine  
aminopeptidase|C0023402|||C0023402;C0202118|CHV;LCH;MSH;MTH;NDFRT;SNOMEDCT|||1|  
LA|leucoagglutinin|C0312638|||||1|0.0051|  
LA|leukemia antigen|||||1|  
LA|leukoagglutinating|||||1|  
LA|leukoagglutinin|C0312638|||C0312638|SNOMEDCT|1|0.0037|  
LA|leukoaraiosis|C0521167;C0948163|||C0948163|MSH;NDFRT|1|0.0082|1|  
LA|leuprolide  
acetate|C0700596|||C0700596|CHV;MSH;MTH;MTHSPL;NCI;NDFRT;PDQ;RXNORM;SNOMEDCT;USPMG;VANDF|1|0.0289|  
LA|levator  
ani|C0224384;C1305037|||C0224384;C1305037|CHV;FMA;NCI;SNOMEDCT;UWDA|||1|  
LA|levulinic acid|C0023591|||C0023591|AOD;MSH;RXNORM;SNOMEDCT|||  
LA|lichen amyloidosis|C0268397|||||1|  
LA|lichen amyloidosis|C0268397|||C0268397|CHV|||  
LA|light adaptation|C0237452|||||1|  
LA|linguoaxial|||||1|  
LA|linoleate|C0125894;C0220871|||C0125894;C0220871|CSP;LNC;MSH;MTH;RXNORM|||  
LA|linoleic|||||1|0.0115|  
LA|linoleic  
acid|C0023749|||C0023749|AOD;CHV;MSH;NCI;NDFRT;RXNORM;SNOMEDCT;VANDF|1|0.1345|1|  
LA|lipoatrophy|C0023787;C1280433|||C0023787;C1280433|CHV;CSP;DXP;MTH;SNOMEDCT|||  
LA|lithocholic acid|C0023875|||C0023875|MSH;NDFRT;SNOMEDCT|||  
LA|lobuloalveolar|||||1|  
LA|local anaesthesia|C0002921;C2930407|||||1|0.0149|  
LA|local anaesthetic|C0002921;C0002934|||||1|0.0146|

LA|local  
anesthesia|C0002921;C2930407||C0002921;C2930407|AOD;CHV;CSP;LCH;MSH;MTH;NCI;NDFRT;SNOMEDCT|1|0.0143|1  
LA|local  
anesthetic|C0002921;C0002934||C0002921;C0002934|CHV;CSP;NDFRT;SNOMEDCT|1|0.0197|1  
LA|localized adherence|||||1|0.0115|  
LA|locomotor activity|C0026606||C0026606|MSH|1|0.0149|  
LA|long arm|C0575519||||||1|  
LA|long axis|C0522487||C0522487|LNC;NCI;SNOMEDCT|||  
LA|long-acting||1|0.852||1|0.0034|1  
LA|loss of attachment|||||1|0.0041|  
LA|louisiana|C0024024||C0024024|CHV|||  
LA|low affinity|||||1|0.0027|  
LA|low altitude|C0238618||C0238618|SNOMEDCT|1|0.0031|  
LA|low anxiety||||||1|  
LA|low-average|||||1|0.0031|  
LA|lumen area|||||1|0.0092|  
LA|lupus  
anticoagulant|C0085240;C0311370||C0085240|CHV;LNC;MSH;NDFRT;SNOMEDCT|1|0.1692|1  
LA|lymphadenectomy|C0024203||C0024203|AOD;CHV;CSP;MSH;NCI;PDQ;SNOMEDCT|1|0.0034|  
LA|lymphocyte antibody|C0003369||||||1|  
LA|lymphoid aggregates|||||1|0.002|  
LDH|(S)-Lactate:NAD+ oxidoreductase|||C0022917|MSH;NDFRT|||  
LDH|Dehydrogenase, L-Lactate|C0022917||C0022917|MSH|||  
LDH|Dehydrogenase, Lactate|C0022917||C0022917|MSH|||  
LDH|EC 1.1.1.27|||C0022917|NCI|||  
LDH|L Lactate Dehydrogenase|C0022917||C0022917|MSH|||  
LDH|L lactate dehydrogenase|C0022917||C0022917|CSP|||  
LDH|L-(+)-Lactate Dehydrogenase|C0022917||C0022917|NCI|||  
LDH|L-Lactate Dehydrogenase|C0022917||C0022917|MSH;NDFRT|||  
LDH|L-Lactate Dehydrogenase [Chemical/Ingredient]|||C0022917|NDFRT|||  
LDH|L-Lactate dehydrogenase|C0022917||C0022917|SNOMEDCT|||  
LDH|L-Lactate dehydrogenase (substance)|||C0022917|SNOMEDCT|||  
LDH|L-Lactic Acid Dehydrogenase|C0022917||C0022917|NCI|||  
LDH|LACTATE DEHYDROGENASE L|C0022917||C0022917|MSH|||  
LDH|LD - Lactate dehydrogenase|C0022917||C0022917|SNOMEDCT|||  
LDH|LD measurement|C0202113||C0202113|SNOMEDCT|||  
LDH|LDH|C0022917||C0022917;C0202113;C0851148|AOD;MSH;NCI|||  
LDH|LDH - Lactate dehydrogenase|C0022917||C0022917|SNOMEDCT|||  
LDH|LDH measurement|C0202113||C0202113|SNOMEDCT|||  
LDH|Lactate Dehydrogenase|C0022917||C0022917;C0202113|MSH;MTH;NCI;NDFRT|||  
LDH|Lactate Dehydrogenase Measurement|C0202113||C0202113|NCI|||  
LDH|Lactate dehydrogenase|C0022917||C0022917|LCH;LNC;SNOMEDCT|||  
LDH|Lactate dehydrogenase (substance)|||C0022917|SNOMEDCT|||  
LDH|Lactate dehydrogenase level|C0202113||C0202113|SNOMEDCT|||  
LDH|Lactate dehydrogenase measurement|C0202113||C0202113|MSH;SNOMEDCT|||  
LDH|Lactate dehydrogenase measurement (procedure)|||C0202113|SNOMEDCT|||  
LDH|Lactatedehydrogenase|||||1|0.0037|  
LDH|Lactic Acid Dehydrogenase|C0022917||C0022917|NCI|||  
LDH|Lactic acid dehydrogenase|C0022917||C0022917|SNOMEDCT|||  
LDH|Lactic acid dehydrogenase measurement|C0202113||C0202113|SNOMEDCT|||  
LDH|Lifetime Drinking History|C0851148||C0851148|AOD;MTH|||  
LDH|NAD-Lactate Dehydrogenase|C0022917||C0022917|NCI|||  
LDH|Serum lactic dehydrogenase|C1278052|||||1|0.0209|  
LDH|dehydrogenase lactate|C0022917||C0022917|CHV|||

LDH|dehydrogenase level|||||1|0.0019|  
LDH|l-lactate dehydrogenase|C0022917|||C0022917|CHV|||  
LDH|lactate dehydrogenase|C0022917|1|1.000|C0022917|CHV;CSP;MTH;NCI|1|0.9584|1  
LDH|lactate dehydrogenase activity|C1151154|||||1|0.0054|  
LDH|lactate dehydrogenase level test|C0202113|||C0202113|CHV|||  
LDH|lactate dehydrogenase release|||||1|0.0029|  
LDH|lactate dehydrogenases|C0022917;C1260230|||C0022917|AOD|||  
LDH|lactic acid dehydrogenase|C0022917|||C0022917|AOD;CHV;CSP;NCI|||  
LDH|layered double hydroxide|||||1|0.0021|  
LDH|ldh measurement|C0202113|||C0202113|CHV|||  
LDH|lifetime drinking history|C0851148|||C0851148|CHV|||  
LDH|low-dose heparin|||||1|0.0019|1  
LDH|lumbar disc herniation|C0281899|||||1|0.0029|  
LDL|Beta-lipoprotein|C0023823|||C0023823|SNOMEDCT|||  
LDL|LDL|C0428474|||C0023823;C0428474;C1325353|AOD;CHV;CSP;FMA;GO;MEDLINEPLUS;NCI  
;SNOMEDCT;UWDA|||  
LDL|LDL - Low density lipoprotein|C0023823|||C0023823|SNOMEDCT|||  
LDL|LDL Cholesterol|C0023824;C0428474|||C0428474|NCI|||  
LDL|LDL Lipoproteins|C0023823|||C0023823|MSH|||  
LDL|LOW DENSITY LIPOPROTEIN|C0023823|||C0023823|CST|||  
LDL|Lipoprotein.beta|C0023823|||C0023823|LNC|||  
LDL|Lipoproteins, LDL|C0023823|||C0023823|MSH;MTH;NDFRT|||  
LDL|Lipoproteins, LDL [Chemical/Ingredient]||||C0023823|NDFRT|||  
LDL|Lipoproteins, Low-Density|C0023823|||C0023823|MSH|||  
LDL|Low Density Lipoprotein|C0023823|||C0023823|NCI|||  
LDL|Low Density Lipoproteins|C0023823|||C0023823|MSH;MTH|||  
LDL|Low density lipoprotein|C0023823|||C0023823|FMA;SNOMEDCT;UWDA|||  
LDL|Low density lipoprotein (substance)||||C0023823|SNOMEDCT|||  
LDL|Low-Density Lipoproteins|C0023823|||C0023823|MSH;MTH;NDFRT|||  
LDL|Serum LDL Cholesterol|C0428474|||C0428474|NCI|||  
LDL|Serum LDL Cholesterol Measurement|C0428474|||C0428474|NCI|||  
LDL|Serum LDL cholesterol level|C0428474|||C0428474|SNOMEDCT|||  
LDL|Serum LDL cholesterol level (procedure)|||C0428474|SNOMEDCT|||  
LDL|Serum LDL cholesterol measurement|C0428474|||C0428474|MTH;SNOMEDCT|||  
LDL|Serum LDL cholesterol measurement (procedure)|||C0428474|SNOMEDCT|||  
LDL|beta Lipoprotein|C0023823|||C0023823|SNOMEDCT|||  
LDL|beta Lipoproteins|C0023823|||C0023823|MSH|||  
LDL|beta lipoprotein|C0023823|||C0023823|CHV|||  
LDL|beta lipoproteins|C0023823|||C0023823|CHV|||  
LDL|beta-Lipoproteins|C0023823|||C0023823|MSH;NDFRT|||  
LDL|ldls|C0023823|||C0023823|CHV|||  
LDL|limitation of daily life|||||1|  
LDL|loudness discomfort level|||||1|0.0021|1  
LDL|low density  
lipoprotein|C0023823|||C0023823|AOD;CHV;CSP;CST;FMA;NCI;SNOMEDCT;UWDA|||  
LDL|low density lipoprotein (LDL)|C0023823|||C0023823|CHV|||  
LDL|low density lipoproteins|C0023823|||C0023823|CHV|||  
LDL|low-density lipoprotein|C0023823|1|1.000|C1325353|GO|1|0.9883|1  
LDL|low-density lipoprotein activity|C1325353|||C1325353|MTH|||  
LDL|low-density lipoprotein cholesterol|C0023824|||||1|0.0097|  
LDL|low-density lipoproteins|C0023823|||C0023823|CHV|||  
LDL|low-density lymphocyte|||||1|  
LD|DIAG LABORATORY|||C0011911|MSH|||  
LD|DKFZP686C2281|C1539521|||C1539521|HUGO|||  
LD|Diagnoses, Laboratory|C0011911|||C0011911|MSH|||  
LD|Diagnosis, Laboratory|C0011911|||C0011911|LCH;MSH;MTH|||  
LD|Disequilibrium, Linkage|C0023746|||C0023746|MSH|||

LD|Disequilibriums, Linkage|C0023746|||C0023746|MSH|||  
LD|EPM2A|C0751783;C1414435|||C1414435|HUGO;OMIM|||  
LD|EPM2A GENE|C1414435|||C1414435|OMIM|||  
LD|EPM2A gene|C1414435|||C1414435|HUGO;LNC;MTH|||  
LD|FKHL14|C1414669;C1705360|||C1705360|NCI|||  
LD|FLJ45135|C1539521|||C1539521|HUGO|||  
LD|FMN|C0016388;C1539521|||C1539521|OMIM|||  
LD|FMN1|C1539521|||C1539521|HUGO;OMIM|||  
LD|FMN1 gene|C1539521|||C1539521|HUGO;MTH|||  
LD|FORMIN|C1539521|||C1539521|OMIM|||  
LD|FORMIN 1|C0125393;C1539521|||C1539521|OMIM|||  
LD|FOXC2 wt Allele|C1705360|||C1705360|MTH;NCI|||  
LD|Forkhead Box C2 wt Allele|C1705360|||C1705360|NCI|||  
LD|L-dopa|C0023570|||1|0.0038|  
LD|LABORATORY DIAG|||C0011911|MSH|||  
LD|LAFORIN|C1414435|||C1414435|OMIM|||  
LD|LD|C0023746;C1705360|||C0011911;C0023746;C0228342;C1414435;C1539521;C1705360|  
FMA;HUGO;NCI;OMIM;SNOMEDCT|||  
LD|LDE|C1414435|||C1414435|HUGO|||  
LD|LIMB DEFORMITY, MOUSE, HOMOLOG OF|||C1539521|OMIM|||  
LD|Laboratory Diagnoses|C0011911|||C0011911|MSH|||  
LD|Laboratory Diagnosis|C0011911|||C0011911|MSH;MTH|||  
LD|Laboratory diagnosis|C0011911|||C0011911|SNOMEDCT|||  
LD|Laboratory diagnosis (contextual qualifier)|||C0011911|SNOMEDCT|||  
LD|Laboratory diagnosis (contextual qualifier) (qualifier  
value)|||C0011911|SNOMEDCT|||  
LD|Lateral Dorsal Nucleus|C0228342|||C0228342|MSH;MTH|||  
LD|Lateral Dorsal Thalamic Nucleus|C0228342|||C0228342|MSH|||  
LD|Lateral dorsal nucleus|C0228342|||C0228342|FMA|||  
LD|Lateral dorsal nucleus of  
thalamus|C0228342;C1761577|||C0228342|FMA;SNOMEDCT|||  
LD|Lateral dorsal nucleus of thalamus (body structure)|||C0228342|SNOMEDCT|||  
LD|Lateral dorsal thalamic nucleus|C0228342|||C0228342|FMA|||  
LD|Laterodorsal Thalamic Nucleus|C0228342|||C0228342|MSH|||  
LD|Laterodorsal nucleus, superficial part|C0228342|||C0228342|FMA|||  
LD|Laterodorsal thalamic nucleus|C0228342|||C0228342|FMA|||  
LD|Learning disabilities|C0751265|||1|0.114|  
LD|Legionnaires' disease|C0023241|||1|0.0284|1  
LD|Leishman-Donovan|||1  
LD|Leishmania donovani|C0023273|||1|0.0038|  
LD|Lepidoglyphus destructor|C0446326|||1|0.0038|  
LD|Linkage Disequilibrium|C0023746|||C0023746|MSH;MTH;NCI|||  
LD|Linkage Disequilibriums|C0023746|||C0023746|MSH|||  
LD|Lombard-Dowell|||1  
LD|Longissimus dorsi|||1|0.0129|  
LD|Lyme disease|C0024198|||1|0.0351|  
LD|MFH-1|C1414669;C1705360|||C1705360|NCI|||  
LD|MFH1|C1414669;C1705360|||C1705360|NCI|||  
LD|MGC125288|C1539521|||C1539521|HUGO|||  
LD|MGC125289|C1539521|||C1539521|HUGO|||  
LD|Mesenchyme Forkhead Gene|C1705360|||C1705360|NCI|||  
LD|Nucleus dorsalis lateralis thalami|C0228342|||C0228342|FMA|||  
LD|Nucleus dorsalis superficialis (Hassler)|||C0228342|FMA|||  
LD|Nucleus lateralis dorsalis|C0228342;C1761577|||C0228342|FMA;SNOMEDCT|||  
LD|Nucleus lateralis dorsalis (body structure)|||C0228342|SNOMEDCT|||  
LD|Nucleus lateralis dorsalis of thalamus|C0228342|||C0228342|FMA|||  
LD|Nucleus lateralis dorsalis thalami|C0228342|||C0228342|FMA|||

LD|Nucleus lateralis thalami dorsalis|C0228342|||C0228342|FMA|||  
LD|Nucleus, Lateral Dorsal|C0228342|||C0228342|MSH|||  
LD|Nucleus, Laterodorsal Thalamic|C0228342|||C0228342|MSH|||  
LD|Structure of lateral dorsal nucleus of  
thalamus|C0228342|||C0228342|SNOMEDCT|||  
LD|Structure of lateral dorsal nucleus of thalamus (body  
structure)|||C0228342|SNOMEDCT|||  
LD|Thalamic Nucleus, Laterodorsal|C0228342|||C0228342|MSH|||  
LD|epilepsy, progressive myoclonus type 2A, Lafora disease  
(laforin)|||C1414435|HUGO|||  
LD|formin 1|C0125393;C1539521|||C1539521|HUGO|||  
LD|labor and delivery|||1  
LD|laboratory data|C1705214|||1  
LD|laboratory diagnosis|C0011911|||C0011911|CHV|||  
LD|labyrinthine defect|||1  
LD|lactate  
dehydrogenase|C0022917|1|0.966|C0022917;C0202113|CHV;CSP;LCH;LNC;MSH;MTH;NCI;NDF  
RT;SNOMEDCT|1|0.101|1  
LD|lamina  
densa|C0085872;C1167354;C1235665|||C0085872;C1167354;C1235665|FMA;GO;MTH;NCI;UWD  
A|1|0.0071|  
LD|laser Doppler|C0430489|||1|0.0305|1  
LD|last dose|||1  
LD|lateral dorsal|||1|0.0046|  
LD|lateral dorsal nucleus (LDN)|C0228342|||C0228342|CHV|||  
LD|laterodorsal|||1|0.0042|  
LD|latissimus  
dorsi|C0224362;C1305028|||C0224362;C1305028|CHV;FMA;SNOMEDCT;UWDA|1|0.0388|1  
LD|latissimus dorsi muscle|C0224362|||1|0.0046|  
LD|learning disabilities|C0751265|||C0751265|CHV;LCH;MEDLINEPLUS;MSH;MTH;OMIM|||  
LD|learning  
disability|C0751265;C1321592|1|0.008|C0751265;C1321592|CHV;CSP;MSH;OMIM;SNOMEDCT  
|||1  
LD|learning disabled|||1|0.0309|1  
LD|learning disorder|C0023186|||C0023186|CHV;CSP;MSH;NCI;SNOMEDCT|||1  
LD|left deltoid|C0694649|||1  
LD|lesion depth|||1|0.0063|  
LD|lethal dose|C1443964|||C1443964|SNOMEDCT|1|0.005|1  
LD|leukodystrophy|C0023520|||1  
LD|levodopa|C0023570|||C0023570|AOD;CHV;CSP;LNC;MSH;MTHSPL;NCI;NDFRT;PDQ;RXNORM;  
SNOMEDCT;USPMG;VANDF|1|0.0276|1  
LD|lichenoid dysplasia|||1  
LD|lidocaine|C0023660|||C0023660|AOD;CHV;CSP;LNC;MSH;MTH;MTHFDA;MTHSPL;NCI;NDFRT  
;PDQ;RXNORM;SNOMEDCT;USPMG;VANDF|1|0.0046|  
LD|light|C0023693;C1306462;C1881376|||1|0.0559|  
LD|light difference|||1  
LD|light differentiation|||1  
LD|light duty|||1  
LD|light-dark|||1  
LD|light-dark cycle|C2718082|||C2718082|MSH|1|0.0205|  
LD|limb deformity|C0239337|||1|0.0092|  
LD|limb deformity protein|C0125393;C1539521|||C1539521|HUGO|||  
LD|limit of detection|C2718050|||C2718050|MSH|1|0.0046|  
LD|limited|C0439801|||C0439801|CHV;LNC;SNOMEDCT|1|0.0042|  
LD|limited disease|||1  
LD|limiting dilution|||1|0.018|  
LD|linear dichroism|||1|0.0263|1

LD|linguodistal|||||1  
LD|linkage disequilibrium|C0023746|||C0023746|CHV;CSP;MSH;MTH;NCI|1|0.2263|  
LD|lipoatrophic  
diabetes|C0011859;C0221032;C1720860|||C0011859;C0221032;C1720860|CHV;MSH;OMIM;SN  
OMEDCT|||  
LD|lipodystrophy|C0023787|||C0023787|AOD;CHV;COSTAR;CSP;CST;ICD9CM;MSH;MTH;NDFRT  
;OMIM;SNOMEDCT|1|0.0142|1  
LD|lithium diluent|||||1  
LD|lithium discontinuation|||||1  
LD|liver disease|C0023895|||C0023895|CCS;CHV;COSTAR;DXP;MSH;NCI;SNOMEDCT|||1  
LD|living donor|C0348050|1|0.002|C0348050|CHV;MSH|1|0.0146|1  
LD|loading dose||1|0.002||1|0.0084|1  
LD|local deviation|||||1  
LD|long days|||||1|0.0367|  
LD|long dialysis|||||1  
LD|long dwell|||||1  
LD|longissimus|C0224306;C0448358|||||1|0.0042|  
LD|longissimus muscle|C0224306|||||1|0.0025|  
LD|longitudinal diameter|||||1  
LD|low density|||||1|0.0125|1  
LD|low dose|C0445550;C1708745|||C0445550|CHV;LNC;SNOMEDCT|1|0.0259|1  
LD|low-dose|C0445550;C1708745|||C1708745|NCI|||  
LD|lumen diameter|||||1|0.005|  
LD|luminance-defined|||||1|0.0038|  
LD|lung destruction|||||1  
LD|lymphocyte defined|||||1  
LD|lymphocyte depletion|C0024257|||C0024257|CHV;MSH;SNOMEDCT|||1  
LD|lymphocytic depletion|||||1|0.0042|  
LD|lymphocytically determined|||||1  
LD|nucleus|C0007610|||||1|0.0042|  
LD|patients with limited disease|||||1|0.0163|  
LD|photoperiod|C0162811|||||1|0.0038|  
LD|under light-dark|||||1|0.0121|  
LEEP|LEEP|C0184930|||C0184930|MTHICD9;NCI;SNOMEDCT|||  
LEEP|Loop Electrosurgical Excision|||C0184930|NCI|||  
LEEP|Loop Electrosurgical Excision Procedure|C0184930|||C0184930|NCI|||  
LEEP|Loop electrosurgical excision procedure|C0184930|||C0184930|SNOMEDCT|||  
LEEP|Loop electrosurgical excision procedure (procedure)|||C0184930|SNOMEDCT|||  
LEEP|Loop electrosurgical excision procedure,  
NOS|C0184930|||C0184930|SNOMEDCT|||  
LEEP|leep|C0184930|||C0184930|CHV|||  
LEEP|left end-expiratory pressure|||||1  
LEEP|loop electrosurgical excision  
procedure|C0184930|1|1.000|C0184930|MTHICD9;NCI;SNOMEDCT|1|1|1  
LEEP|loop electrosurgical excision procedure (LEEP)|C0184930|||C0184930|CHV|||  
LEEP|loop excision|C0184930|||C0184930|NCI|||  
LE|<=|||C0439090|SNOMEDCT|||  
LE|<= (qualifier value)|C1285164|||C0439090|SNOMEDCT|||  
LE|Antigen, Le|C0023595|||C0023595|MSH|||  
LE|Antigens, Le|C0023595|||C0023595|MSH|||  
LE|BLOOD GROUP--LEWIS SYSTEM|C0023595|||C0023595|OMIM|||  
LE|Blood-Group System, Lewis|C0023595|||C0023595|MSH|||  
LE|HPS4|C1423767|||C1423767|HUGO;OMIM|||  
LE|HPS4 GENE|C1423767|||C1423767|OMIM|||  
LE|HPS4 gene|C1423767|||C1423767|HUGO;MTH|||  
LE|Hermansky-Pudlak syndrome 4|C1423767|||C1423767|HUGO|||  
LE|HuIFN-alpha|||||1|0.0096|

LE|ISBT system 007|C0023595|||C0023595|SNOMEDCT|||  
LE|ISBT system LE|C0023595|||C0023595|SNOMEDCT|||  
LE|KIAA1667|C1423767|||C1423767|HUGO|||  
LE|L little e NOS Ag|C0023595|||C0023595|LNC|||  
LE|LB|||C0023190|NCI|||  
LE|LBN|C0023190;C1426383|||C0023190|NCI|||  
LE|LE|C0439090;C1423767|||C0023190;C0439090;C1423767|HUGO;NCI|||  
LE|LEBANON|C0023190|||C0023190|NCI|||  
LE|Lateral epicondylitis|C0039516|||1|0.0096|  
LE|Le|C0439090;C1423767|||C0023595|OMIM|||  
LE|Le Antigen|C0023595|||C0023595|MSH|||  
LE|Le Antigens|C0023595|||C0023595|MSH;NDFRT|||  
LE|Le NOS AG|C0023595|||C0023595|LNC|||  
LE|Le not otherwise specified AG|C0023595|||C0023595|LNC|||  
LE|Le not otherwise specified Antigen|C0023595|||C0023595|LNC|||  
LE|Le(a) Blood Group System|||C0023595|MSH;NDFRT|||  
LE|Lebanon|C0023190|||C0023190|AOD;CSP;LCH;MSH;MTH;NCI;SNOMEDCT|||  
LE|Lebanon (geographic location)|||C0023190|SNOMEDCT|||  
LE|Leonard|||1|  
LE|Less Than or Equal To|C0439090|||C0439090|NCI|||  
LE|Less Than or Equal to|C0439090|||C0439090|MTH|||  
LE|Less than or equal|||C0439090|HL7V2.5;HL7V3.0|||  
LE|Less-than-or-equal symbol <=|||C0439090|SNOMEDCT|||  
LE|Less-than-or-equal symbol <= (qualifier value)|||C0439090|SNOMEDCT|||  
LE|Lesser Than or Equal To|||C0439090|NCI|||  
LE|Leu-enkephalin|C0014294;C1418447|||1|0.0139|  
LE|Leukocyte elastase|C0064833;C1414369|||1|0.0193|  
LE|Lewis|||1|0.0622|1|  
LE|Lewis Blood Group System|C0023595|||C0023595|MSH|||  
LE|Lewis Blood-Group System|C0023595|||C0023595|MSH;MTH;NDFRT|||  
LE|Lewis Blood-Group System [Chemical/Ingredient]|||C0023595|NDFRT|||  
LE|Lewis System|C0023595|||C0023595|MSH;NDFRT|||  
LE|Lewis blood group system|C0023595|||C0023595|SNOMEDCT|||  
LE|Lewis blood group system (qualifier value)|||C0023595|SNOMEDCT|||  
LE|Lewis group|C0023595|||C0023595|LNC|||  
LE|Lewis system|C0023595|||C0023595|LCH|||  
LE|Long Evans|C2697858|||1|  
LE|Long-Evans|C2697858|||1|0.2283|  
LE|Long-Evans rats|C0324537|||1|0.0193|  
LE|Loteprednol etabonate|C0126177|||1|0.0161|  
LE|System, Lewis|C0023595|||C0023595|MSH|||  
LE|System, Lewis Blood-Group|C0023595|||C0023595|MSH|||  
LE|labelling efficiency|||1|0.0075|  
LE|labor epidural|||1|  
LE|law enforcement|C0162469|||C0162469|AOD;CHV;MSH|||  
LE|lebanon|C0023190|||C0023190|CHV|||  
LE|left  
ear|C0229299;C1289055|||C0229299;C1289055|CHV;FMA;HL7V2.5;NCI;SNOMEDCT;UWDA|1|0.0064|1|  
LE|left eye|C0229090|||C0229090|CHV;FMA;HL7V2.5;SNOMEDCT;UWDA|1|0.0129|1|  
LE|leg exercise|C0454361|||1|0.0075|  
LE|leg extension|||1|0.0075|  
LE|lens epithelial|||1|0.0064|  
LE|lens extraction|C0197689;C0197717|||1|  
LE|leucine enkephalin|C0014294|||1|0.0182|1|

LE|leukocyte  
 elastase|C0064833;C1414369|||C0064833;C1414369|CSP;HUGO;MSH;MTH;NDFRT;SNOMEDCT||  
 |  
 LE|leukocyte esterase|C0125619;C0427760|1|0.690|||1|0.03|1  
 LE|leukoerythrogenic|||||1  
 LE|life events|C0557155|||1|0.0107|  
 LE|life expectancy|C0023671|||C0023671|AOD;CHV;CSP;LCH;LNC;MSH|1|0.0332|  
 LE|liquid-expanded|||||1|0.0107|  
 LE|live embryo|||||1  
 LE|liver extract|C0023899|||1|0.0107|  
 LE|local excision|C0278259|||1|0.0193|1  
 LE|low-energy|||||1|0.0225|  
 LE|lower  
 extremity|C0023216|1|0.268|C0023216|AOD;CHV;CST;FMA;LNC;MSH;MTH;NCI;SNOMEDCT;UWD  
 A|1|0.0364|1  
 LE|luminal epithelial|||||1|0.0064|  
 LE|luminal epithelium|||||1|0.0332|  
 LE|lupus  
 erythematosus|C0409974|1|0.006|C0409974|CHV;ICD9CM;LCH;LNC;MTH;NCI;SNOMEDCT|1|0.  
 329|1  
 LE|lymphedema|C0024236|1|0.006|||1|0.0129|  
 LE|sinemet-levodopa||1|0.002|||1  
 LFT|Function Test, Liver|C0023901|||C0023901|MSH|||  
 LFT|Function Tests, Liver|C0023901|||C0023901|MSH|||  
 LFT|Hepatic function panel|C0023901;C0812554|||C0023901|SNOMEDCT|||  
 LFT|Hepatic function panel (procedure)|||C0023901|SNOMEDCT|||  
 LFT|LFT|C0023901|||C0023901|NCI|||  
 LFT|LFT - Liver function test|C0023901|||C0023901|SNOMEDCT|||  
 LFT|LFT's|C0023901|||C0023901|SNOMEDCT|||  
 LFT|Liver Function Test|C0023901|||C0023901|MSH;NCI|||  
 LFT|Liver Function Tests|C0023901|||C0023901|MSH;MTH|||  
 LFT|Liver Study|C0023901|||C0023901|NCI|||  
 LFT|Liver funct. test -gen.|C0023901|||C0023901|SNOMEDCT|||  
 LFT|Liver function test|C0023901|||C0023901|SNOMEDCT|||  
 LFT|Liver function tests|C0023901|||C0023901|LCH;MTHMST;SNOMEDCT|||  
 LFT|Liver function tests (& [general])||||C0023901|SNOMEDCT|||  
 LFT|Liver function tests (& [general]) (procedure)|||C0023901|SNOMEDCT|||  
 LFT|Liver function tests (& general)|||C0023901|SNOMEDCT|||  
 LFT|Liver function tests (& general) (procedure)|||C0023901|SNOMEDCT|||  
 LFT|Liver function tests (procedure)|||C0023901|SNOMEDCT|||  
 LFT|Liver function tests - general|||C0023901|SNOMEDCT|||  
 LFT|Liver function tests - general (procedure)|||C0023901|SNOMEDCT|||  
 LFT|Liver function tests NOS|C0023901|||C0023901|SNOMEDCT|||  
 LFT|Liver function tests NOS (procedure)|||C0023901|SNOMEDCT|||  
 LFT|Test, Liver Function|C0023901|||C0023901|MSH|||  
 LFT|Tests, Liver Function|C0023901|||C0023901|MSH|||  
 LFT|function hepatic panel||||C0023901|CHV|||  
 LFT|hepatic function panel|C0023901;C0812554|||C0023901|CHV|||  
 LFT|lateral femoral torsion|||||1  
 LFT|latex fixation test|C0023117|||||1  
 LFT|latex flocculation test|||||1  
 LFT|left front transverse|||||1  
 LFT|liver function test|C0023901|1|1.000|C0023901|AOD;CHV;MSH;NCI;SNOMEDCT|||1  
 LFT|liver function tests|C0023901|||C0023901|CHV|1|1|  
 LFT|liver panel|C0023901|||C0023901|CHV|||  
 LFT|liver panels|C0023901|||C0023901|CHV|||  
 LFT|liver studies|||C0023901|CHV|||

LFT|liver study|C0023901|||C0023901|CHV|||  
LFT|liver test|C0023901|||C0023901|CHV|||  
LFT|liver testing|C0023901|||C0023901|CHV|||  
LFT|liver tests|||C0023901|CHV|||  
LFT|localized fibrous tumor|C1266119|||1  
LFT|low flap transverse|||1  
LFT|low-frequency tetanic|||1  
LFT|low-frequency transduction|||1  
LFT|low-frequency transfer|||1  
LFT|lung function test|C0024119|||C0024119|AIR;CHV;MSH;NCI|||1  
LFT|test liver function|C0023901|||C0023901|CHV|||  
LIMA|Lima|C1047251|||C1047251|NCBI|||  
LIMA|large intestinal mucin antigen|||1|0.0263|  
LIMA|left internal mammary artery|C0447054|1|1.000|||1|0.9737|1  
LIMA|lima|C1047251|||C1047251|CHV|||  
LMP|Date last menstrual period|C0425932;C0488490|||C0425932|LNC|||  
LMP|Date of last menstrual period|C0425932|||C0425932|MTH;SNOMEDCT|||  
LMP|Date of last menstrual period (observable entity)|||C0425932|SNOMEDCT|||  
LMP|LMP|C0425932|||C0425932|NCI|||  
LMP|LMP - Last menstrual period|C0425932|||C0425932|SNOMEDCT|||  
LMP|Last Menstrual Period|C0425932|||C0425932|NCI|||  
LMP|Last menstrual period|C0425932|||C0425932|LNC;SNOMEDCT|||  
LMP|date of last menstrual period|C0425932|||C0425932|CHV|||  
LMP|last menstrual  
period|C0425932|1|1.000|C0425932|CHV;LNC;NCI;SNOMEDCT|1|0.2586|1  
LMP|latent membrane protein|||1|0.4116|1  
LMP|left mentum posterior|||1  
LMP|lmp|C0425932|||C0425932|CHV|||  
LMP|low malignant potential|||1|0.3113|1  
LMP|low molecular mass polypeptide|||1|0.0185|  
LMP|lumbar puncture|C0037943;C0553794;C1548878|||1  
LP|LIVER PANCREAS ANTIGEN|C2239920|||C2239920|OMIM|||  
LP|LP|C0037943;C0228341;C2239920|||C0037943;C0228341;C2239920|FMA;NCI;OMIM|||  
LP|LP - Lumbar puncture|C0037943|||C0037943|SNOMEDCT|||  
LP|Lateral Posterior Nucleus|C0228341|||C0228341|MSH|||  
LP|Lateral Posterior Nucleus of the Thalamus|C0228341|||C0228341|NCI|||  
LP|Lateral Posterior Thalamic Nucleus|C0228341|||C0228341|MSH|||  
LP|Lateral posterior nucleus|C0228341|||C0228341|FMA|||  
LP|Lateral posterior nucleus of  
thalamus|C0228341;C1761578|||C0228341|FMA;MTH;SNOMEDCT|||  
LP|Lateral posterior nucleus of thalamus (body  
structure)|||C0228341|SNOMEDCT|||  
LP|Lateral posterior thalamic nucleus|C0228341|||C0228341|FMA|||  
LP|Laterodorsal nucleus, caudal part|C0228341|||C0228341|FMA|||  
LP|Legionella pneumophila|C0023238|||1|0.0124|1  
LP|Lipiodol|C0947677|||1|0.0062|  
LP|Lumbar Puncture|C0037943;C0553794;C1548878|||C0037943|MSH;NCI|||  
LP|Lumbar Punctures|C0037943|||C0037943|MSH|||  
LP|Lumbar puncture|C0037943;C0553794;C1548878|||C0037943|SNOMEDCT|||  
LP|Lumbar puncture (procedure)|||C0037943|SNOMEDCT|||  
LP|Lumbar puncture, NOS|C0037943;C0553794;C1548878|||C0037943|SNOMEDCT|||  
LP|Lumboperitoneal|||1|0.0108|  
LP|Lymphocyte proliferation|C0596873|||1|0.017|  
LP|Nucleus dorsocaudalis (Hassler)|||C0228341|FMA|||  
LP|Nucleus lateralis posterior|||C0228341|FMA;SNOMEDCT|||  
LP|Nucleus lateralis posterior (body structure)|||C0228341|SNOMEDCT|||  
LP|Nucleus lateralis posterior thalami|C0228341|||C0228341|FMA|||

LP|Nucleus lateralis thalami posterior||||C0228341|FMA|||  
LP|Nucleus, Lateral Posterior|C0228341|||C0228341|MSH|||  
LP|O-PHOSPHOSERINE tRNA-SELENOCYSTEINE tRNA SYNTHASE|C2239920|||C2239920|OMIM|||  
LP|Posterior lateral nucleus of thalamus|C0228341|||C0228341|FMA|||  
LP|Puncture, Lumbar|C0037943;C0553794;C1548878|||C0037943|MSH|||  
LP|Puncture, Spinal|C0037943;C0553794|||C0037943|MSH|||  
LP|Punctures, Lumbar|C0037943|||C0037943|MSH|||  
LP|Punctures, Spinal|C0037943|||C0037943|MSH|||  
LP|Rachicentesis|C0037943;C0553794|||C0037943|SNOMEDCT|||  
LP|SEPSECS|C2239920|||C2239920|HUGO;OMIM|||  
LP|SEPSECS gene|C2239920|||C2239920|HUGO;MTH|||  
LP|SLA|C1420083;C2239920|||C2239920|HUGO;OMIM|||  
LP|SLA/LP|||C2239920|HUGO|||  
LP|SOLUBLE LIVER ANTIGEN|C0142996;C2239920|||C2239920|OMIM|||  
LP|Sep (O-phosphoserine) tRNA:Sec (selenocysteine) tRNA  
synthase|||C2239920|HUGO|||  
LP|Spinal Puncture|C0037943;C0553794|||C0037943|MSH;MTH|||  
LP|Spinal Punctures|C0037943|||C0037943|MSH|||  
LP|Spinal Tap|C0037943;C0553794|||C0037943|MSH;NCI|||  
LP|Spinal Taps|C0037943;C0553794|||C0037943|MSH|||  
LP|Spinal puncture|C0037943;C0553794|||C0037943|SNOMEDCT|||  
LP|Spinal puncture and aspiration|||C0037943|SNOMEDCT|||  
LP|Spinal tap|C0037943;C0553794|||C0037943|SNOMEDCT|||  
LP|Spinal tap (procedure)|||C0037943|SNOMEDCT|||  
LP|Spinal tap (procedure) [Ambiguous]|||C0037943|SNOMEDCT|||  
LP|Structure of lateral posterior nucleus of  
thalamus|C0228341|||C0228341|SNOMEDCT|||  
LP|Structure of lateral posterior nucleus of thalamus (body  
structure)|||C0228341|SNOMEDCT|||  
LP|Tap, Spinal|C0037943;C0553794|||C0037943|MSH|||  
LP|Taps, Spinal|C0037943;C0553794|||C0037943|MSH|||  
LP|coefficient|C1707429|||1|0.0072|  
LP|diagnostic spinal tap|||C0037943|CHV|||  
LP|hydraulic conductance|||1|0.0118|  
LP|hydraulic conductivity|||1|0.0726|  
LP|hydraulic permeability|||1|0.0149|  
LP|insulin lispro|C0293359|||1|0.0051|  
LP|labile peptide|||1|  
LP|labile protein|||1|  
LP|laboratory procedure|C0022885|||1|  
LP|lactic peroxidase|||1|  
LP|lactoperoxidase|C0022948;C1416903|||C0022948;C1416903|CHV;CSP;HUGO;MSH;MTH;ND  
FRT;OMIM|1|0.0154|  
LP|lamina propria|C1179187|||C1179187|CHV;FMA;MSH;NCI;UWDA|1|0.0715|1|  
LP|large-plaque|||1|0.0098|  
LP|laryngopharyngeal|C0020629;C0023079|||1|  
LP|late potentials|||1|0.0592|  
LP|late proximal|||1|0.0051|  
LP|latency period|C0023103|||1|0.0036|1|  
LP|latent period|||1|0.0072|1|  
LP|lateral plantar|||1|  
LP|lateral posterior|||1|0.0108|  
LP|lateral posterior nucleus|C0228341|||C0228341|FMA;MSH|1|0.016|  
LP|lateral prostate|||1|0.0077|  
LP|lateral pyloric|||1|0.0237|  
LP|lateral pylorus|||1|  
LP|lateralis posterior|||1|

LP|lateroposterior thalamic nucleus|||||1|0.0026|  
LP|latex particle|C0524643|||||1|  
LP|leading pole|||||1|  
LP|leg press|||||1|0.0057|  
LP|legionella pneumonia|C0023241|||||1|0.0026|  
LP|leukapheresis|C0023416|||C0023416|AOD;CHV;CSP;LCH;MSH;NCI;PDQ|1|0.0046|  
LP|leukapheresis products|||||1|0.0057|  
LP|leukocyte poor|||||1|  
LP|leukocytic pyrogen|||||1|0.0196|1|  
LP|levator palati|C0448313|||||1|  
LP|levator palpebrae|||||1|  
LP|licensed practitioner||1|0.018|||||  
LP|lichen  
planus|C0023646|||C0023646|AOD;CHV;COSTAR;CSP;DXP;ICD9CM;LCH;MSH;MTH;NCI;NDFRT;S  
NOMEDCT|1|0.1009|1|  
LP|ligamentum patellae|C0206332;C1305920|||||1|  
LP|light peak|||||1|0.0046|  
LP|light perception|||||1|0.0077|1|  
LP|lightly padded|||||1|  
LP|linear prediction|||||1|0.0057|1|  
LP|linear programming|C0033349|||||1|0.0087|1|  
LP|lingua plicata|C0040412|||||1|  
LP|linguopulpal|||||1|  
LP|link protein|C0065011|||C0065011|CHV;CSP;MSH;MTH|1|0.0144|  
LP|lipid panel|C0200382|||||1|  
LP|lipid peroxidation|C0023775|||C0023775|CHV;MSH;NCI;SNOMEDCT|1|0.1338|  
LP|lipid peroxide|C0023776|||C0023776|CHV;CSP|||  
LP|lipid peroxides|C0023776|||||1|0.019|  
LP|lipophorin|C0065050;C1153627|||||1|0.0057|  
LP|lipoprotein|C0023820|||C0023820|CHV;FMA;LNC;MSH;NCI;NDFRT;SNOMEDCT;UWDA|||1|  
LP|lipoprotein particles|||||1|0.0026|  
LP|lipoproteins|C0023820|||||1|0.0345|  
LP|lispro|C0293359|||C0293359|CHV;MSH;NDFRT|||  
LP|liver plasma|||||1|  
LP|liver-pancreas|C1442317|||||1|  
LP|long photoperiod|||||1|0.0082|  
LP|loop-tail|||||1|0.0154|  
LP|lost privileges|||||1|  
LP|low passage|||||1|0.0026|  
LP|low potency|||||1|  
LP|low power|||||1|  
LP|low pressure|||||1|  
LP|low protein|C0242972;C0748025|||C0242972;C0748025|CHV;HL7V3.0|||1|  
LP|low protein diet|C0242972|||||1|0.0036|  
LP|low-pressure|||||1|0.0046|  
LP|low-protein|C0242972;C0748025|||||1|0.0412|  
LP|low-protein diet|C0242972|||C0242972|CHV;MSH|||  
LP|lumbar  
puncture|C0037943;C0553794;C1548878|1|0.978|C0037943;C0553794;C1548878|AOD;CHV;C  
SP;HL7V2.5;MSH;NCI;SNOMEDCT|1|0.0741|1|  
LP|lumbar punctures|C0037943|||C0037943|CHV|||  
LP|lumboperitoneal|||||1|  
LP|lung parenchyma|C0819757;C1279455|||||1|  
LP|lung perfusion|||||1|  
LP|luteal phase|C0024153|||C0024153|CHV;CSP;GO;LCH;MSH;MTH|1|0.0108|  
LP|lymphocyte predominance|||||1|0.0098|  
LP|lymphocyte predominant|||||1|0.0072|1|

LP|lymphocyte proliferation|C0596873|||C0596873|CHV;CSP;GO;LNC|||  
LP|lymphocyte proliferative|||1|0.0031|  
LP|lymphocytic predominance|||1|0.0057|  
LP|lymphoid plasma|||1|  
LP|lymphoid predominance|||1|  
LP|lymphomatoid  
papulosis|C0206182|||C0206182|CHV;MSH;MTH;NCI;NDFRT;SNOMEDCT|1|0.0082|1  
LP|lymphomatous polyposis|||1|  
LP|lymphoproliferation|||1|0.0046|  
LP|lymphoproliferative|||1|0.0103|  
LP|lysylpyridinoline|C0057455|||C0057455|MSH|||  
LP|nucleus lateralis posterior|||1|0.0067|  
LP|serum lipoprotein|||1|0.0067|  
LP|soluble liver antigen/liver pancreas antigen|||C2239920|HUGO|||  
LP|spinal puncture|C0037943;C0553794|||C0037943|CHV|||  
LP|spinal tap|C0037943;C0553794|||C0037943|AOD;CHV;CSP;NCI|||  
LP|spinal tapping|C0037943;C0553794|||C0037943|CHV|||  
LP|spinal taps|C0037943;C0553794|||C0037943|CHV|||  
LP|water permeability|||1|0.0108|  
LVAD|left ventricular assist  
device|C0181598|1|1.000|C0181598|CHV;NCI;SNOMEDCT|1|1|1|  
LVEF|left ventricular ejection  
fraction|C0428772;C0488728|1|1.000|C0428772;C0488728|LNC;MTH;SNOMEDCT|1|0.9964|1  
LVEF|left ventricular function|C0080310|||1|0.0036|  
LVH|Hypertrophies, Left Ventricular|C0149721|||C0149721|MSH|||  
LVH|Hypertrophy, Left Ventricular|C0149721;C0232306|||C0149721|MSH;NDFRT|||  
LVH|Hypertrophy, Left Ventricular [Disease/Finding]|||C0149721|NDFRT|||  
LVH|LEFT VENTRICULAR HYPERTROPHY|C0149721;C0232306|||C0149721|COSTAR;NCI|||  
LVH|LV hypertrophy|C0149721|||C0149721|SNOMEDCT|||  
LVH|LV+ - Left ventricular hypertrophy|C0149721|||C0149721|SNOMEDCT|||  
LVH|LVH|C0149721|||C0149721|DXP|||  
LVH|LVH - Left ventricular hypertrophy|C0149721|||C0149721|SNOMEDCT|||  
LVH|Left Ventricular Hypertrophies|C0149721|||C0149721|MSH|||  
LVH|Left Ventricular  
Hypertrophy|C0149721;C0232306|||C0149721|MSH;MTH;NCI;NDFRT|||  
LVH|Left ventricular hypertrophy|C0149721;C0232306|||C0149721|OMIM;SNOMEDCT|||  
LVH|Left ventricular hypertrophy (disorder)|||C0149721|SNOMEDCT|||  
LVH|VENTRICULAR HYPERTROPHY, LEFT|C0149721;C0232306|||C0149721|DXP;NCI|||  
LVH|Ventricular Hypertrophies, Left|C0149721|||C0149721|MSH|||  
LVH|Ventricular Hypertrophy, Left|C0149721;C0232306|||C0149721|MSH;NDFRT|||  
LVH|Ventricular hypertrophy (& [left])|||C0149721|SNOMEDCT|||  
LVH|Ventricular hypertrophy (& [left]) (disorder)|||C0149721|SNOMEDCT|||  
LVH|hypertrophy left ventricular|||C0149721|CHV|||  
LVH|large vessel hematocrit|||1|  
LVH|left ventricular enlargement|C0149721|||C0149721|CHV|||  
LVH|left ventricular  
hypertrophy|C0149721;C0232306|1|0.994|C0149721;C0232306|CHV;COSTAR;MSH;MTH;NCI;N  
DFRT;OMIM;SNOMEDCT|1|1|1|  
LVH|lv hypertrophy|C0149721|||C0149721|CHV|||  
LVH|lvh|C0149721|||C0149721|CHV|||  
LV|5-fluorouracil (5-FU)/leucovorin|||1|0.0013|  
LV|CF|||C0731033|PDQ|||  
LV|CFR|C0731033;C1305363;C1515366|||C0731033|PDQ|||  
LV|Calcium (6S)-Folate|||C0731033|NCI;PDQ|||  
LV|Calcium Folate|C0731033|||C0731033|MSH;NCI;NDFRT|||  
LV|Calcium Leucovorin|C0731033|||C0731033|MSH;NCI;NDFRT|||  
LV|Calcium folinate|C0731033|||C0731033|SNOMEDCT|||

LV|Calcium leucovorin|C0731033|||C0731033|SNOMEDCT|||  
LV|Calcium leucovorin (substance)|||C0731033|SNOMEDCT|||  
LV|Calcium leucovorin preparation|C0731033|||C0731033|SNOMEDCT|||  
LV|Calcium leucovorin preparation (product)|||C0731033|SNOMEDCT|||  
LV|Calcium leucovorin preparation (substance)|||C0731033|SNOMEDCT|||  
LV|Citrovorum Factor|C0023413;C0731033|||C0731033|MSH;NCI;NDFRT|||  
LV|Citrovorum Factor [Chemical/Ingredient]|||C0731033|NDFRT|||  
LV|Citrovorum factor|C0023413;C0731033|||C0731033|SNOMEDCT|||  
LV|Citrovorum factor preparation|C0731033|||C0731033|SNOMEDCT|||  
LV|Factor, Citrovorum|C0023413;C0731033|||C0731033|MSH;NCI|||  
LV|Folate Calcium|C0731033|||C0731033|NCI|||  
LV|Folate, Calcium|C0731033|||C0731033|MSH|||  
LV|Folinic Acid Calcium Salt Pentahydrate|C0731033|||C0731033|NCI;PDQ|||  
LV|L-CF|C0731033|||C0731033|PDQ|||  
LV|LATVIA|C0023128|||C0023128|NCI|||  
LV|LEUCOVORIN CALCIUM|C0731033|||C0731033|MTHSPL;NCI;NDFRT;VANDF|||  
LV|LG|||C0023128|NCI|||  
LV|LV|C0023128;C0731033;C1881413|||C0023128;C0731033;C1881413|NCI;PDQ|||  
LV|LVA|C0023128|||C0023128|NCI|||  
LV|Lactobacillus viridescens|C0317606|||1|||  
LV|Lassa Virus|C0023093|||1|0.0009|  
LV|Latvia|C0023128|||C0023128|AOD;LCH;MSH;MTH;NCI;SNOMEDCT|||  
LV|Latvia (geographic location)|||C0023128|SNOMEDCT|||  
LV|Lelystad virus|C0376535|||1|0.0023|  
LV|Leucovorin Calcium|C0731033|||C0731033|MTH;MTHSPL;NCI;RXNORM;USPMG|||  
LV|Leucovorin calcium|C0731033|||C0731033|SNOMEDCT|||  
LV|Leucovorin calcium preparation|C0731033|||C0731033|SNOMEDCT|||  
LV|Leucovorin, Calcium|C0731033|||C0731033|MSH|||  
LV|Levofolate calcium|C0731033|||C0731033|PDQ|||  
LV|Liposome Vesicle|C1881413|||C1881413|MTH;NCI|||  
LV|Lupus vulgaris|C0024131|||1|0.0009|  
LV|MLV|C0026398;C0026626;C1881413|||C1881413|NCI|||  
LV|Multilamellar Liposome Vesicles|C1881413|||C1881413|NCI|||  
LV|SUV|C1881413;C2348529|||C1881413|NCI|||  
LV|Small Unilamellar Vesicles|C1881413|||C1881413|NCI|||  
LV|calcium folinate|C0731033|||C0731033|CHV;PDQ|||  
LV|calcium leucovorin|C0731033|||C0731033|CHV;PDQ|||  
LV|citrovorum factor|C0023413;C0731033|||C0731033|CHV;NCI;PDQ|||  
LV|folinate calcium|C0731033|||C0731033|PDQ|||  
LV|lactoovovegetarian|||1|||  
LV|laryngeal vestibule|C0225564|||C0225564|FMA;MTH;SNOMEDCT;UWDA|||1  
LV|lateral  
ventricle|C0152279;C1268982|||C0152279;C1268982|CHV;CSP;FMA;MSH;NCI;SNOMEDCT|||1  
LV|latvia|C0023128|||C0023128|CHV|||  
LV|lecithovitellin|C0604480|||C0604480|MSH|||  
LV|left  
ventricle|C0225897;C1269892|1|1.000|C0225897;C1269892|AOD;CHV;FMA;MSH;NCI;SNOMED  
CT;UWDA|1|0.119|1  
LV|left ventricular|||1|0.8664|1  
LV|left ventricular free wall|||1|0.0005|  
LV|left ventricle|||1|0.001|  
LV|length density|||1|0.0016|  
LV|leucovorin|C0023413|||C0023413|CHV;CSP;MSH;MTH;NCI;NDFRT;PDQ;RXNORM;SNOMEDCT;  
USPMG;VANDF|||  
LV|leucovorin calcium|C0731033|||C0731033|CHV;NCI;PDQ|||  
LV|leukemia virus|C0596828|||C0596828|AOD;CHV;CSP|||1  
LV|leukocytoclastic vasculitis|C0151436;C2973529|||1|0.0011|

LV|lipovitellin|C0065069|||||1|0.0013|  
LV|liquid ventilation|C0419019|||||1|0.0013|1  
LV|live vaccine|C0042211|||C0042211|CHV;CSP|||1  
LV|live virus|||||||1  
LV|low vertical|||||||1  
LV|low volume|||||||1  
LV|lumbar  
vertebra|C0024091;C1269051|||C0024091;C1269051|CHV;FMA;NCI;SNOMEDCT;UWDA|||1  
LV|lung ventilation|C0554804|||||1|0.0007|  
LV|lung volume|C0231953|||C0231953|CHV;CSP;SNOMEDCT|1|0.0017|1  
M0|M0|C0445034|||C0445034|NCI;SNOMEDCT|||  
M0|M0|Cancer Stage Finding|C0445034|||C0445034|NCI|||  
M0|M0|Distant Metastasis Finding|C0445034|||C0445034|NCI|||  
M0|M0|Distant Metastasis Stage Finding|C0445034|||C0445034|NCI|||  
M0|M0|Metastasis Finding|C0445034|||C0445034|NCI|||  
M0|M0|Metastasis Stage|C0445034|||C0445034|NCI|||  
M0|M0|Stage|C0445034|||C0445034|NCI|||  
M0|M0|Stage Finding|C0445034|||C0445034|NCI|||  
M0|M0|TNM Finding|C0445034|||C0445034|NCI|||  
M0|M0|category|C0445034|||C0445034|SNOMEDCT|||  
M0|M0|category (finding)|||C0445034|SNOMEDCT|||  
M0|M0|stage|C0445034|||C0445034|SNOMEDCT|||  
M0|M0|stage (finding)|C0445034|||C0445034|SNOMEDCT|||  
M0|M0|stage (tumor staging)|||C0445034|SNOMEDCT|||  
M0|Metastasis Stage M0|C0445034|||C0445034|NCI|||  
M0|Metastasis stage M0|C0445034|||C0445034|SNOMEDCT|||  
M0|Metastasis stage M0 (tumor staging)|||C0445034|SNOMEDCT|||  
M0|acute myeloid leukemia with minimal differentiation|C0522631|1|0.002|||||  
M0|distant metastases|||||1|1|  
M0|no evidence of distant metastases||1|0.998|||||1  
MAI|GLUTATHIONE S-TRANSFERASE Z1|C1415341|||C1415341|OMIM|||  
MAI|GLUTATHIONE S-TRANSFERASE, ZETA-1|C1415341|||C1415341|OMIM|||  
MAI|GSTZ1|C1415341|||C1415341|HUGO;OMIM|||  
MAI|GSTZ1 gene|C1415341|||C1415341|HUGO;MTH|||  
MAI|GSTZ1-1|C1415341|||C1415341|HUGO|||  
MAI|MAAI|C1415341|||C1415341|HUGO;OMIM|||  
MAI|MAC (Mycobacterium avium Complex)|||C0026914|CSP|||  
MAI|MAC complex|C0026914|||C0026914|SNOMEDCT|||  
MAI|MAI|C0026914;C1415341|||C1415341|HUGO|||  
MAI|MAIC|C0026914|||C0026914|MSH|||  
MAI|MAIS complex|C0026914|||C0026914|SNOMEDCT|||  
MAI|MALEYLACETOACETATE ISOMERASE|C0065576;C1415341|||C1415341|OMIM|||  
MAI|MYCOBACT AVIUM COMPLEX|||C0026914|MSH|||  
MAI|MYCOBACT AVIUM INTRACELLULARE|||C0026914|MSH|||  
MAI|MYCOBACT AVIUM INTRACELLULARE COMPLEX|||C0026914|MSH|||  
MAI|MYCOBACTERIUM AVIUM COMPLEX|C0026914;C0026916|||C0026914|NCI|||  
MAI|Marriage Adjustment Inventory|||||||1  
MAI|Medication Appropriateness Index|||||||1  
MAI|Movement Assessment of Infants|||||1|0.0603|1  
MAI|Multidimensional Anger Inventory|||||1|0.0402|  
MAI|Mycobacterium avium Complex|C0026914;C0026916|||C0026914|CSP;MSH;MTH|||  
MAI|Mycobacterium avium  
complex|C0026914;C0026916|||C0026914|LNC;NCBI;NCI;SNOMEDCT|||  
MAI|Mycobacterium avium complex (MAC)|C0026914;C0026916|||C0026914|NCBI|||  
MAI|Mycobacterium avium-  
intracellulare|C0026914;C2718284|1|1.000|C0026914|MSH|1|0.5829|1  
MAI|Mycobacterium avium-intracellulare Complex|C0026914|||C0026914|MSH|||

MAI|Mycobacterium avium-intracellulare complex|C0026914|||||1|0.0352|  
MAI|Mycobacterium, MAIS group|C0026914|||C0026914|SNOMEDCT|||  
MAI|glutathione transferase zeta 1|C1415341|||C1415341|HUGO|||  
MAI|mac|||C0026914|CHV|||  
MAI|magnetic-assisted intervention||||||1  
MAI|mai|C0026914;C1415341|||C0026914|CHV|||  
MAI|maic|C0026914|||C0026914|CHV|||  
MAI|maleylacetoacetate isomerase|C0065576;C1415341|||C1415341|HUGO|||  
MAI|maximal aggregation index||||||1  
MAI|microscopic aggregation index||||||1  
MAI|milliampere impulse||||||1  
MAI|minor acute illness||||||1  
MAI|mitotic activity index|||||1|0.2814|1  
MAI|morbid anxiety inventory||||||1  
MAI|movement arousal index||||||1  
MAI|mycobacterium avium complex|C0026914;C0026916|||C0026914|CHV|||  
MAI|mycobacterium avium complex (MAC)|C0026914;C0026916|||C0026914|CHV|||  
MAPS|MAP|C0024779;C1706473|||C0026045|CSP;FMA;UWDA|||  
MAPS|MAPs|C0024779;C0026045|||C0026045|NCI|||  
MAPS|MICROTUBULE ASSOC PROTEINS|||C0026045|MSH|||  
MAPS|Make A Picture Story||||||1  
MAPS|Making Action Plans||||||1  
MAPS|Map|C0024779;C1706473|||C0024779|NCI|||  
MAPS|Maps|C0024779;C0026045|||C0024779|LCH;MSH;MTH|||  
MAPS|Microtubule Associated Protein|C0026045|||C0026045|NCI|||  
MAPS|Microtubule Associated Proteins|C0026045|||C0026045|MSH;NDFRT|||  
MAPS|Microtubule-Associated Proteins|C0026045|||C0026045|MSH;MTH;NCI;NDFRT|||  
MAPS|Microtubule-Associated Proteins [Chemical/Ingredient]|||C0026045|NDFRT|||  
MAPS|Microtubule-associated protein|C0026045|||C0026045|FMA;UWDA|||  
MAPS|Multidimensional Affect and Pain Survey|||||1|0.0174|  
MAPS|Multiple antigen peptides|||||1|0.0244|  
MAPS|map|C0024779;C1706473|||C0024779|AOD;CHV|||  
MAPS|maps|C0024779;C0026045|||C0024779|CHV|||  
MAPS|mean arterial pressures|||||1|0.0226|  
MAPS|medical advanced pain specialists||1|1.000|||  
MAPS|microtubule associated protein|C0026045|||C0026045|CSP|||  
MAPS|microtubule-associated proteins|C0026045|||||1|0.7491|  
MAPS|microtubule-associated proteins (MAP)|C0026045|||C0026045|CHV|||  
MAPS|monophasic action potentials|||||1|0.1638|  
MAPS|multiple antigenic peptides|||||1|0.0226|  
MCA|1,2-Dihydro-3-methyl-benz(j)aceanthrylene|||C0000325|NCI|||  
MCA|20 Methylcholanthrene|C0000325|||C0000325|MSH|||  
MCA|20-Methylcholanthrene|C0000325|||C0000325|MSH;MTH;NCI|||  
MCA|20-methylcholanthrene|C0000325|||||1|0.0043|  
MCA|3-methylcholanthrene|C0000431|||||1|0.0509|  
MCA|Arteria cerebri media|C0149566|||C0149566|FMA;UWDA|||  
MCA|Arteries, Middle Cerebral|C0149566|||C0149566|MSH|||  
MCA|Artery, Middle Cerebral|C0149566;C1269012|||C0149566|MSH|||  
MCA|Cerebral Arteries, Middle|C0149566|||C0149566|MSH|||  
MCA|Cerebral Artery, Middle|C0149566;C1269012|||C0149566|MSH|||  
MCA|Cerebral artery middle|C0149566|||C0149566|LNC|||  
MCA|MCA|C0000325;C0149566|||C0000325;C0149566|NCI|||  
MCA|Metabolic control analysis|||||1|0.0092|  
MCA|Methylcholanthrene|C0000325;C0025732|||C0000325|NCI|||  
MCA|Middle Cerebral Arteries|C0149566|||C0149566|MSH|||  
MCA|Middle Cerebral Artery|C0149566;C1269012|||C0149566|MSH;NCI|||  
MCA|Middle cerebral artery|C0149566;C1269012|||C0149566|FMA;SNOMEDCT;UWDA|||

MCA|Middle cerebral artery, NOS|C0149566;C1269012|||C0149566|SNOMEDCT|||  
MCA|Multiple Correspondence Analysis|||||1|0.0049|  
MCA|Structure of middle cerebral artery|C0149566|||C0149566|MTH;SNOMEDCT|||  
MCA|Structure of middle cerebral artery (body structure)|||C0149566|SNOMEDCT|||  
MCA|Sylvian artery|C0149566|||C0149566|FMA;SNOMEDCT;UWDA|||  
MCA|artery cerebral middle|C0149566|||C0149566|CHV|||  
MCA|carcinoma associated antigen|||||1|0.0043|  
MCA|main coronary artery|||||||1|  
MCA|major coronary artery|||||||1|  
MCA|mammary carcinoma|C0678222|||C0678222|NCI|1|0.0033|  
MCA|medical care administration|||||||1|  
MCA|mesial contact area|||||||1|  
MCA|metacarpal amputation|C1384684|||||||1|  
MCA|methylcholanthrene|C0000325;C0025732|||C0000325;C0025732|CSP;MSH;MTH;NCI;NDF  
RT;SNOMEDCT|1|0.0151|1|  
MCA|methylcyanoacrylate|C0066180|||C0066180|MSH|||  
MCA|metoclopramide|C0025853|||||1|0.0049|  
MCA|microcarcinoma|||||||1|  
MCA|microcytotoxicity assay|||||||1|0.0023|  
MCA|micrometastases clonogenic assay|||||||1|  
MCA|middle cerebral|||||||1|0.0141|  
MCA|middle cerebral aneurysm|||||||1|  
MCA|middle cerebral arterial|||||||1|0.0039|  
MCA|middle cerebral  
artery|C0149566;C1269012|1|1.000|C0149566;C1269012|CHV;FMA;MSH;NCI;SNOMEDCT;UWDA  
|1|0.7959|1|  
MCA|middle colic artery|C0226328;C1280137|||||||1|  
MCA|minimal cross-sectional area|||||||1|0.0062|  
MCA|monocarboxylic acid|||||||1|  
MCA|monochloroacetate|C2708021|||C2708021|LNC|1|0.0039|  
MCA|monochloroacetic  
acid|C0008225|||C0008225|CHV;MSH;NDFRT;SNOMEDCT;VANDF|1|0.0069|  
MCA|monoclonal antibodies|C0003250|||||1|0.0424|  
MCA|monoclonal antibody|C0003250|||C0003250|CHV;CSP;NCI;SNOMEDCT|||  
MCA|monocyte chemotactic activity|||||||1|0.0043|  
MCA|motorcycle accident|C0574035|||C0574035|CHV;SNOMEDCT|||1|  
MCA|mucin-like carcinoma-associated antigen|||||||1|0.0108|  
MCA|mucinlike carcinoma-associated antigen|||||||1|  
MCA|multichannel analyzer|||||||1|  
MCA|multiple congenital abnormalities|||||||1|  
MCA|multiple congenital  
anomalies|C0000772|||C0000772|CHV;CST;ICPC;MTH;SNOMEDCT|1|0.0122|1|  
MCA|multiple congenital anomaly|C0000772|||C0000772|CHV|||  
MCH|Ery. Mean Corpuscular  
Hemoglobin|C2344229;C0369183;C1261502|||C0369183|NCI|||  
MCH|Erythrocyte Mean Corpuscular Hemoglobin|C0369183;C1261502|||C0369183|NCI|||  
MCH|Erythrocyte Mean Corpuscular Hemoglobin Test|C0369183|||C0369183|MTH|||  
MCH|MCH|C0369183;C1418669;C2248810|||C0369183;C1418669|HUGO;NCI;OMIM|||  
MCH|MCH - Mean cell haemoglobin|C0369183|||C0369183|SNOMEDCT|||  
MCH|MCH - Mean cell hemoglobin|C0369183|||C0369183|SNOMEDCT|||  
MCH|MCH - Mean corpuscular haemoglobin|C0369183|||C0369183|SNOMEDCT|||  
MCH|MCH - Mean corpuscular hemoglobin|C0369183|||C0369183|SNOMEDCT|||  
MCH|MCH - NOS|C0369183;C1418669;C2248810|||C0369183|SNOMEDCT|||  
MCH|MCH - NOS (procedure)|||C0369183|SNOMEDCT|||  
MCH|MCH determination|C0369183|||C0369183|SNOMEDCT|||  
MCH|MELANIN-CONCENTRATING HORMONE|C0065898;C1418669|||C1418669|OMIM|||  
MCH|Maternal and Child Health|||||||1|0.1947|

MCH|Mean cell haemoglobin|||C0369183|SNOMEDCT|||  
MCH|Mean cell haemoglobin (& level)|C1261502|||C0369183|SNOMEDCT|||  
MCH|Mean cell haemoglobin (& level) (procedure)|||C0369183|SNOMEDCT|||  
MCH|Mean cell hemoglobin|||C0369183|SNOMEDCT|||  
MCH|Mean cell hemoglobin (& level)|C1261502|||C0369183|SNOMEDCT|||  
MCH|Mean corpuscular haemoglobin (MCH) -  
NOS|C0369183;C1261502|||C0369183|SNOMEDCT|||  
MCH|Mean corpuscular haemoglobin (MCH) - NOS (procedure)|||C0369183|SNOMEDCT|||  
MCH|Mean corpuscular haemoglobin NOS|C0369183;C1261502|||C0369183|SNOMEDCT|||  
MCH|Mean corpuscular haemoglobin determination|C0369183|||C0369183|SNOMEDCT|||  
MCH|Mean corpuscular hemoglobin (MCH) -  
NOS|C0369183;C1261502|||C0369183|SNOMEDCT|||  
MCH|Mean corpuscular hemoglobin NOS|C0369183;C1261502|||C0369183|SNOMEDCT|||  
MCH|Mean corpuscular hemoglobin NOS (procedure)|||C0369183|SNOMEDCT|||  
MCH|Mean corpuscular hemoglobin determination|C0369183|||C0369183|SNOMEDCT|||  
MCH|Mean corpuscular hemoglobin determination  
(procedure)|||C0369183|SNOMEDCT|||  
MCH|Melanin-concentrating hormone|C0065898;C1418669|||1|0.3767|  
MCH|PMCH|C1418669|||C1418669|HUGO;OMIM|||  
MCH|PMCH gene|C1418669|||C1418669|HUGO;MTH|||  
MCH|PRO-MELANIN-CONCENTRATING HORMONE|C0526383;C1418669|||C1418669|OMIM|||  
MCH|acetyl-beta-methylcholine|C0524770|||1|0.0127|  
MCH|beta-methylmalyl-CoA dehydratase activity|C2248810|||C2248810|GO|||  
MCH|intrafemoral artery infusions of the endothelium-dependent vasodilator  
methacholine chloride|||1|0.0058|  
MCH|maternal and child health|||1|  
MCH|mch|C0369183;C1418669;C2248810|||C2248810|GO|||  
MCH|mean cell haemoglobin|||C0369183|CHV|||  
MCH|mean cell hemoglobin|||C0369183|CHV|||1|  
MCH|mean corpuscular Hb|||1|0.0104|  
MCH|mean corpuscular  
hemoglobin|C0369183;C1261502|1|1.000|C0369183;C1261502|AOD;CHV;MSH|||1|  
MCH|mean corpuscular hemoglobin (MCH) test|||C0369183|CHV|||  
MCH|melanin-concentrating hormone|C0065898;C1418669|||1|  
MCH|mesaconyl-CoA hydratase activity|C2248810|||C2248810|GO;MTH|||  
MCH|mesaconyl-coenzyme A hydratase activity|C2248810|||C2248810|GO|||  
MCH|methacholine|C0600370|||1|0.3894|1|  
MCH|microfibrillar collagen hemostat|C1289976|||1|  
MCH|mucous cell hyperplasia|||1|  
MCH|muscle contraction headache|C0393736|||1|0.0104|1|  
MCH|pro-melanin-concentrating hormone|C0526383;C1418669|||C1418669|HUGO|||  
MCP|1-methylcyclopropene|C0960343|||1|0.0171|  
MCP|4 Amino-5-chloro-N-(2-(diethylamino)ethyl)-2-  
methoxybenzamide|||C0025853|MSH;NDFRT|||  
MCP|ANTIGEN DEFINED BY MONOCLONAL ANTIBODY TRA-2-10|||C1824669|OMIM|||  
MCP|ANTIGENS CD 046|||C0285488|MSH|||  
MCP|Antigen, CD46|C0285488|||C0285488|MSH|||  
MCP|Antigens, CD46|C0285488|||C0285488|MSH;NDFRT|||  
MCP|Antigens, CD46 [Chemical/Ingredient]|||C0285488|NDFRT|||  
MCP|Benzamide, 4-amino-5-chloro-N-(2-(diethylamino)ethyl)-2-methoxy-  
|||C0025853|MSH;NDFRT|||  
MCP|CAPG|C1413108;C1826382|||C1413108|HUGO;OMIM|||  
MCP|CAPG gene|C1413108|||C1413108|HUGO;MTH|||  
MCP|CAPPING PROTEIN, GELSOLIN-LIKE|C1413108|||C1413108|OMIM|||  
MCP|CD 046 ANTIGENS|||C0285488|MSH|||  
MCP|CD46|||C0285488;C1824669|CSP;HUGO;LNC;OMIM;SNOMEDCT|||  
MCP|CD46 - Cluster of differentiation antigen 46|||C0285488|SNOMEDCT|||

MCP|CD46 Antigen|C0285488|||C0285488|MSH;MTH;NDFRT|||  
MCP|CD46 Antigens|C0285488|||C0285488|MSH;NDFRT|||  
MCP|CD46 gene|C1824669|||C1824669|HUGO;MTH|||  
MCP|CD46 molecule complement regulatory protein|||C0285488|SNOMEDCT|||  
MCP|CD46 molecule, complement regulatory protein|||C1824669|HUGO|||  
MCP|COMPLEMENT MEMBRANE COFACTOR PROTEIN|C1824669|||C1824669|OMIM|||  
MCP|Cluster of differentiation antigen 46|||C0285488|SNOMEDCT|||  
MCP|Common Antigen, Trophoblast-Leukocyte|C0285488|||C0285488|MSH|||  
MCP|Gp45-70|C0285488|||C0285488|SNOMEDCT|||  
MCP|Lymphocyte antigen CD46|C0285488|||C0285488|SNOMEDCT|||  
MCP|Lymphocyte antigen CD46 (substance)|||C0285488|SNOMEDCT|||  
MCP|MACROPHAGE CAPPING PROTEIN|C1413108|||C1413108|OMIM|||  
MCP|MCP|||C0025853;C0285488;C1150292;C1413108;C1824669|GO;HUGO;OMIM;PDQ;SNOMEDCT|||  
MCP|MCP - Membrane cofactor protein|C0285488|||C0285488|SNOMEDCT|||  
MCP|MEMBRANE COFACTOR PROTEIN|C0285488;C1824669|||C1824669|OMIM|||  
MCP|METOCLOPRAMIDE|C0025853|||C0025853|NCI;NDFRT;VANDF|||  
MCP|MGC26544|C1824669|||C1824669|HUGO|||  
MCP|MIC10|C1824669|||C1824669|OMIM|||  
MCP|Membrane Cofactor Protein|C0285488;C1824669|||C0285488|MSH;NDFRT|||  
MCP|Membrane cofactor protein|C0285488;C1824669|||C0285488|SNOMEDCT|||  
MCP|Membrane cofactor protein (substance)|||C0285488|SNOMEDCT|||  
MCP|Metaclopramide|C0025853|||C0025853|MSH;NDFRT|||  
MCP|Metaclopramide|C0025853|||C0025853|MSH;NDFRT|||  
MCP|Metoclopramide|C0025853|||C0025853|LNC;MSH;MTH;MTHSPL;NCI;NDFRT;RXNORM;SNOMEDCT;USPMG|||  
MCP|Metoclopramide (product)|||C0025853|SNOMEDCT|||  
MCP|Metoclopramide (substance)|||C0025853|SNOMEDCT|||  
MCP|Metoclopramide -RETIRED-|||C0025853|SNOMEDCT|||  
MCP|Metoclopramide [Chemical/Ingredient]|||C0025853|NDFRT|||  
MCP|Metoclopramide(motility) [see chapter d for preparations]|||C0025853|SNOMEDCT|||  
MCP|Metoclopramide(motility) [see chapter d for preparations] (product)|||C0025853|SNOMEDCT|||  
MCP|Metoclopramide(motility) [see chapter d for preparations] (substance)|||C0025853|SNOMEDCT|||  
MCP|TLX|C1417831;C1824669|||C1824669|HUGO;OMIM|||  
MCP|TLX - Trophoblast leucocyte common antigen|||C0285488|SNOMEDCT|||  
MCP|TLX - Trophoblast leukocyte common antigen|||C0285488|SNOMEDCT|||  
MCP|TRA2.10|C1824669|||C1824669|HUGO|||  
MCP|TROPHOBLAST-LYMPHOCYTE CROSS-REACTIVE ANTIGEN|C1824669|||C1824669|OMIM|||  
MCP|Trophoblast Leukocyte Common Antigen|C0285488|||C0285488|MSH|||  
MCP|Trophoblast leucocyte common antigen|C0285488|||C0285488|SNOMEDCT|||  
MCP|Trophoblast leukocyte common antigen|C0285488|||C0285488|SNOMEDCT|||  
MCP|Trophoblast-Leukocyte Common Antigen|C0285488|||C0285488|MSH;NDFRT|||  
MCP|calcium phosphate|C0006711;C0006712;C1161320|||1|0.0114|  
MCP|capping protein (actin filament), gelsolin-like|||C1413108|HUGO|||  
MCP|cd46 antigen|C0285488|||C0285488|CHV|||  
MCP|macrophage capping protein|C1413108|||C1413108|HUGO|||  
MCP|maximum closure pressure|||||||1  
MCP|maximum contraction pattern|||||||1  
MCP|mean carotid pressure|||||||1  
MCP|mean circulatory pressure||||||1|0.0209|  
MCP|medial coronoid process||||||1|0.0114|  
MCP|melanocortin receptor|C0254370|||C0254370|MSH;MTH;NDFRT|||  
MCP|melanosis circumscripta precancerosa|||||||1

MCP|membrane cofactor  
protein|C0285488;C1824669||C0285488;C1824669|MSH;NDFRT;OMIM;SNOMEDCT|||1  
MCP|membrane cofactor protein (MCP)|C0285488;C1824669||C0285488|CHV|||  
MCP|metacarpophalangeal||1|1.000|||1|0.4163|1  
MCP|metaclopramide|C0025853||C0025853|CHV|||  
MCP|metaclopramide|C0025853||C0025853|CHV|||  
MCP|methyl-accepting chemotaxis protein|||||||1  
MCP|methylclofenapate|C0008998|||1|0.038|  
MCP|methylenecyclopropane|C1699480||C1699480|MSH|||  
MCP|metoclopramide|C0025853||C0025853|AOD;CHV;CSP;LNC;MSH;MTH;MTHSPL;NCI;NDFRT;  
RXNORM;SNOMEDCT;USPMG;VANDF|1|0.3251|  
MCP|microchannel plate|||||1|0.0114|  
MCP|mitotic control protein|||||||1  
MCP|monocrotophos|C0026472|||1|0.0247|  
MCP|monocyte chemoattractant protein|C0282566|||||||1  
MCP|monocyte chemotactic protein|C0282566||C0282566|CHV|||  
MCP|mucin clot prevention|||||||1  
MCP|mucopolysaccharidoses|C0026703|||||||1  
MCP|mucosal carrier protein|||||||1  
MCP|multicatalytic protease|||||1|0.0171|  
MCP|multicatalytic proteinase|C0208355;C2258865|||||1|0.0665|  
MCP|multifocal choroiditis and panuveitis|||||1|0.0133|  
MCP|multifocal choroiditis with panuveitis|||||||1  
MCP|proteins|C0033684|||||1|0.0266|  
MCP|threonine endopeptidase activity|C1150292||C1150292|GO|||  
MCP|threonine-type endopeptidase activity|C1150292||C1150292|GO;MTH|||  
MCV|CDDP/MTX/VBL|||C0285131|NCI;PDQ|||  
MCV|CMV|||C0285131|CHV;NCI;PDQ|||  
MCV|CMV chemotherapy protocol|C0285131||C0285131|CHV|||  
MCV|Cell Volumes, Mean|C0524587||C0524587|MSH|||  
MCV|Cisplatin/Methotrexate/Vinblastine|||C0285131|NCI|||  
MCV|Corpuscular Volumes, Mean|C0524587||C0524587|MSH|||  
MCV|Ery. Mean Corpuscular  
Volume|C2344229;C0524587;C0863148;C1948043||C1948043|NCI|||  
MCV|Erythrocyte Mean Corpuscular Volume|C0524587;C1948043||C1948043|NCI|||  
MCV|Erythrocyte Mean Corpuscular Volume Measurement|C1948043||C1948043|MTH|||  
MCV|Erythrocyte Volume, Mean Cell|C0524587||C0524587|MSH|||  
MCV|Erythrocyte mean corpuscular  
volume|C0524587;C1948043||C0524587;C1948043|LNC;SNOMEDCT|||  
MCV|Erythrocyte mean corpuscular volume (observable  
entity)|||C0524587|SNOMEDCT|||  
MCV|Finding of mean cell volume|C0524587||C0524587|SNOMEDCT|||  
MCV|Finding of mean cell volume (finding)|||C0524587|SNOMEDCT|||  
MCV|MCPyV|C2304881||C2304881|NCI|||  
MCV|MCV|C0524587||C0285131;C0524587;C1948043;C2304881|AOD;NCI;PDQ|||  
MCV|MCV - NOS|C0524587||C0524587|SNOMEDCT|||  
MCV|MCV - NOS (finding)|||C0524587|SNOMEDCT|||  
MCV|MEC Protocol 1|C0285131||C0285131|NCI|||  
MCV|MEC protocol 1|C0285131||C0285131|MSH|||  
MCV|McV|C0524587||C1961129|SNOMEDCT|||  
MCV|Mean Cell Volume|C0524587;C0863148||C0524587|MSH|||  
MCV|Mean Cell Volumes|C0524587||C0524587|MSH|||  
MCV|Mean Corpuscular Volume|C0524587;C0863148;C1948043||C0524587|MSH|||  
MCV|Mean Corpuscular Volume (result)|C0524587||C0524587|MTH|||  
MCV|Mean Corpuscular Volumes|C0524587||C0524587|MSH|||  
MCV|Mean cell volume|C0524587;C0863148||C0524587|SNOMEDCT|||  
MCV|Mean cell volume - finding|C0524587||C0524587|SNOMEDCT|||

MCV|Merkel Cell Polyomavirus|C2304881|||C2304881|NCI|||  
MCV|Merkel cell polyomavirus|C2304881|||C2304881|MSH;MTH;NCBI|||  
MCV|Merkel cell polyomaviruses|||C2304881|MSH|||  
MCV|Microvolt|C1961129|||C1961129|MTH;NCI;SNOMEDCT|||  
MCV|Microvolt (qualifier value)|||C1961129|SNOMEDCT|||  
MCV|Middle cardiac vein|C0226660;C1280940|||1|0.0157|  
MCV|Volume, Mean Cell|C0524587;C0863148|||C0524587|MSH|||  
MCV|Volume, Mean Corpuscular|C0524587;C0863148;C1948043|||C0524587|MSH|||  
MCV|Volumes, Mean Cell|C0524587|||C0524587|MSH|||  
MCV|Volumes, Mean Corpuscular|C0524587|||C0524587|MSH|||  
MCV|cisplatin/methotrexate/vinblastine|||C0285131|PDQ|||  
MCV|cisplatin/methotrexate/vinblastine protocol|C0285131|||C0285131|MTH|||  
MCV|conduction velocities|C0234084|||1|0.0157|  
MCV|corpuscular mean volume|C0524587;C0863148|||C0524587|CHV|||  
MCV|mcV|C0524587|||C1961129|NCI|||  
MCV|mcv|C0524587|||C0524587|CHV|||  
MCV|mean cell  
volume|C0524587;C0863148|||C0524587;C0863148|CHV;MSH;SNOMEDCT|1|0.1771|1  
MCV|mean clinical value|||1|  
MCV|mean corpuscular  
volume|C0524587;C0863148;C1948043|1|1.000|C0524587;C0863148;C1948043|AOD;CHV;MSH  
|1|0.6325|1  
MCV|mean corpuscular volume (MCV)|C0524587;C0863148;C1948043|||C0524587|CHV|||  
MCV|measles-containing vaccine|||1|0.012|1  
MCV|melanoma cell vaccine|||1|0.012|  
MCV|melanoma whole-cell vaccine|||1|  
MCV|middle cardiac  
vein|C0226660;C1280940|||C0226660;C1280940|FMA;NCI;SNOMEDCT;UWDA|||  
MCV|molluscum contagiosum  
virus|C0026394|||C0026394|CSP;MSH;MTH;NCBI;SNOMEDCT|1|0.0723|1  
MCV|motor conduction velocity|||1|  
MCV|motor nerve conduction velocity|C0457379|||C0457379|CHV;SNOMEDCT|1|0.0627|  
MCV|myelocytomatosis virus|||1|  
MCV|polyomavirus, Merkel cell|C2304881|||C2304881|MSH|||  
MCV|polyomaviruses, Merkel cell|||C2304881|MSH|||  
MCV|uV|C0041625;C1961129|||C1961129|NCI|||  
MDI|BIPOLAR AFFECTIVE DISORDER|C0005586|||C1839839|OMIM|||  
MDI|BPAD|||C1839839|OMIM|||  
MDI|MAFD2|C1416966;C1839839|||C1839839|OMIM|||  
MDI|MAJOR AFFECTIVE DISORDER 2|C1416966;C1839839|||C1839839|MTH;OMIM|||  
MDI|MANIC-DEPRESSIVE ILLNESS|C0005586;C1839839|||C1839839|OMIM|||  
MDI|MANIC-DEPRESSIVE PSYCHOSIS, X-LINKED|C1839839|||C1839839|OMIM|||  
MDI|MDI|C1839839;C2984065|||C1839839;C2984065|NCI;OMIM|||  
MDI|MDX|C1839839|||C1839839|OMIM|||  
MDI|Major Depression Inventory|||1|0.0159|  
MDI|Mental Development Index|C2825548|||1|0.0749|  
MDI|Mental Developmental Index|||1|0.0634|  
MDI|Metered Dose Inhaler Dosage Form|C2984065|||C2984065|NCI|||  
MDI|Metered Dose Inhaler Dose Form|C0993596;C2984065|||C2984065|NCI|||  
MDI|Michelson Doppler imager|||1|  
MDI|Multiscore Depression Inventory|||1|  
MDI|diphenylmethane diisocyanate|C0047822|||1|0.0591|  
MDI|diphenylmethane-4,4'-diisocyanate|||1|0.0231|  
MDI|isocyanate|C0162344|||1|0.0144|  
MDI|manic-depressive  
illness|C0005586;C1839839|||C0005586;C1839839|CHV;MEDLINEPLUS;OMIM;SNOMEDCT|1|0.  
0346|1

MDI|mental development index|C2825548|||||1  
MDI|metered dose  
inhaler|C0418991;C0993596||C0418991;C0993596|CHV;HL7V3.0;MSH;MTH;NCI;NDFRT;RXNORM;SNOMEDCT|1|0.6585|  
MDI|metered-dose inhaler|C0418991;C0993596|1|1.000|||||1  
MDI|methylene diphenyl diisocyanate|C0047822|||||1  
MDI|methylenedioxyindenes|||||1  
MDI|modulation detection interference|||||1|0.0159|  
MDI|multidirectional instability|||||1  
MDI|multiple daily injection|||||1  
MDI|multiple daily injections|||||1|0.0403|  
MDI|multiple dose injection|||||1  
MD|Doctor of Medicine|C1512018||C1512018|HL7V2.5;MTH;NCI|||  
MD|Dorsal Medial Nucleus|C0228329||C0228329|MSH|||  
MD|Dorsal medial nucleus of thalamus|C0228329||C0228329|FMA|||  
MD|Dorsomedial Nucleus|C0228329||C0228329|MSH|||  
MD|Dorsomedial Nucleus of the Thalamus|C0228329||C0228329|NCI|||  
MD|Dorsomedial Thalamic Nucleus|C0228329||C0228329|MSH|||  
MD|Dorsomedial nuclear group|C0228329||C0228329|FMA|||  
MD|Dorsomedial nucleus|C0228329||C0228329|FMA|||  
MD|Dorsomedial nucleus of thalamus|C0228329;C1284630||C0228329|FMA;SNOMEDCT|||  
MD|Dystrophies, Muscular|C0026850||C0026850|MSH|||  
MD|Dystrophy, Muscular|C0026850||C0026850|MSH|||  
MD|Hered prog musc dystrophy||||C0026850|ICD9CM|||  
MD|Hereditary progressive muscular  
dystrophy|C0026850||C0026850|ICD9CM;SNOMEDCT|||  
MD|Hereditary progressive muscular dystrophy (disorder)|||C0026850|SNOMEDCT|||  
MD|Hereditary progressive muscular dystrophy NOS|C0026850||C0026850|SNOMEDCT|||  
MD|Hereditary progressive muscular dystrophy NOS  
(disorder)|||C0026850|SNOMEDCT|||  
MD|Hereditary progressive muscular dystrophy,  
NOS|C0026850||C0026850|SNOMEDCT|||  
MD|M.D.|C1512018||C1512018|NCI|||  
MD|MD|||C0024858;C0026374;C0026850;C0228329;C1512018|FMA;MEDLINEPLUS;NCI|||  
MD|MD - Muscular dystrophy|C0026850||C0026850|SNOMEDCT|||  
MD|MDA|C0000379;C0026374||C0026374|NCI|||  
MD|MOLDOVA, REPUBLIC OF|||C0026374|NCI|||  
MD|Mantoux diameter|||||1  
MD|Marek disease|C0024793|||||1  
MD|Marek's disease|C0024793|||||1|0.1075|  
MD|Maryland|C0024858||C0024858|AOD;LCH;MSH;NCI;SNOMEDCT|||  
MD|Maryland (geographic location)|C0024858||C0024858|MTH;SNOMEDCT|||  
MD|Mean deviation|C1828170|||||1|0.0531|  
MD|Meckel diverticulum|C0025037|||||1  
MD|Meckel's diverticulum|C0025037|||||1|0.0137|  
MD|Medial Dorsal Nucleus|C0228329;C1284630||C0228329|MSH;MTH|||  
MD|Medial dorsal nucleus|C0228329;C1284630||C0228329|FMA;SNOMEDCT|||  
MD|Medial dorsal nucleus of thalamus|C0228329||C0228329|FMA|||  
MD|Medial nuclear group|C0228329||C0228329|FMA|||  
MD|Medial nuclear group of thalamus|C0228329||C0228329|FMA;SNOMEDCT|||  
MD|Medial nuclear group of thalamus, NOS|C0228329||C0228329|SNOMEDCT|||  
MD|Medial thalamic nuclei|C0228329||C0228329|FMA|||  
MD|Medial thalamic nucleus|C0228329||C0228329|FMA|||  
MD|Mediodorsal Nucleus|C0228329||C0228329|MSH|||  
MD|Mediodorsal Thalamic Nucleus|C0228329||C0228329|MSH|||  
MD|Mediodorsal nucleus|C0228329||C0228329|FMA|||  
MD|Mediodorsal thalamic nucleus|C0228329||C0228329|FMA|||

MD|Mixed Dementia|||||1|0.0043|  
MD|Moldavia|C0026374|||C0026374|AOD;MSH;SNOMEDCT|||  
MD|Moldavia (geographic location)|||C0026374|SNOMEDCT|||  
MD|Moldavian S.S.R.|C0026374|||C0026374|LCH;MSH|||  
MD|Moldavian SSR|C0026374|||C0026374|MSH|||  
MD|Moldova|C0026374|||C0026374|AOD;MSH;MTH;NCI|||  
MD|Moldova, Republic of|||C0026374|NCI|||  
MD|Monocular deprivation|||||1|0.0231|  
MD|Movement disorders|C0026650|||||1|0.0034|  
MD|Muscular Dystrophies|C0026850|||C0026850|MSH;NDFRT|||  
MD|Muscular Dystrophies [Disease/Finding]||||C0026850|NDFRT|||  
MD|Muscular  
Dystrophy|C0026850|||C0026850|COSTAR;MEDLINEPLUS;MSH;MTH;NCI;NDFRT|||  
MD|Muscular dystrophy|C0026850|||C0026850|LCH;OMIM;SNOMEDCT|||  
MD|Muscular dystrophy (disorder)|||C0026850|SNOMEDCT|||  
MD|Muscular dystrophy NOS|C0026850|||C0026850|MTHICD9|||  
MD|Muscular dystrophy, NOS|C0026850|||C0026850|SNOMEDCT|||  
MD|Myelin deficiency|||||1|0.0026|  
MD|Myodystrophica|C0026850|||C0026850|MSH;NDFRT|||  
MD|Myodystrophicas|C0026850|||C0026850|MSH|||  
MD|Myodystrophies|C0026850|||C0026850|MSH|||  
MD|Myodystrophy|C0026850|||C0026850|MSH;NDFRT|||  
MD|Nuclei mediales (thalami)|C1305699|||C0228329|FMA|||  
MD|Nucleus dorsomedialis thalami|C0228329|||C0228329|FMA|||  
MD|Nucleus medialis dorsalis|C0228329|||C0228329|FMA;SNOMEDCT|||  
MD|Nucleus medialis dorsalis (Hassler)|||C0228329|FMA|||  
MD|Nucleus medialis dorsalis (body structure)|||C0228329|SNOMEDCT|||  
MD|Nucleus medialis dorsalis thalami|C0228329|||C0228329|FMA|||  
MD|Nucleus mediodorsalis thalami|C0228329|||C0228329|FMA|||  
MD|Nucleus, Dorsal Medial|C0228329|||C0228329|MSH|||  
MD|Nucleus, Dorsomedial|C0228329|||C0228329|MSH|||  
MD|Nucleus, Dorsomedial Thalamic|C0228329|||C0228329|MSH|||  
MD|Nucleus, Medial Dorsal|C0228329;C1284630|||C0228329|MSH|||  
MD|Nucleus, Mediodorsal|C0228329|||C0228329|MSH|||  
MD|Nucleus, Mediodorsal Thalamic|C0228329|||C0228329|MSH|||  
MD|PMD - Progressive muscular dystrophy|C0026850|||C0026850|SNOMEDCT|||  
MD|Progressive muscular dystrophy|C0026850|||C0026850|SNOMEDCT|||  
MD|Republic of Moldova|C0026374|||C0026374|NCI|||  
MD|Structure of dorsomedial nucleus of thalamus|C0228329|||C0228329|SNOMEDCT|||  
MD|Structure of dorsomedial nucleus of thalamus (body  
structure)|||C0228329|SNOMEDCT|||  
MD|Structure of medial nuclear group of thalamus|||C0228329|SNOMEDCT|||  
MD|Structure of medial nuclear group of thalamus (body  
structure)|||C0228329|SNOMEDCT|||  
MD|Thalamic Nucleus, Dorsomedial|C0228329|||C0228329|MSH|||  
MD|Thalamic Nucleus, Mediodorsal|C0228329|||C0228329|MSH|||  
MD|diabetic|C0241863|||||1|0.0043|  
MD|diseases|C0012634|||||1|0.0051|  
MD|distance|C0012751|||||1|0.0069|  
MD|macula densa|C0227662;C1280231|||||1|0.03|1  
MD|macular degeneration|C0024437;C0242383|||||1|  
MD|magnesium deficiency|C0024473|||C0024473|CHV;CSP;MSH;MTH;NDFRT;SNOMEDCT|||1  
MD|main duct|||||1|  
MD|maintenance dialysis|||||1|  
MD|maintenance dose|||||1|0.0047|1

MD|major  
depression|C0041696;C1269683|||C0041696;C1269683|AOD;CHV;COSTAR;CSP;NCI;SNOMEDCT  
|1|0.0771|1  
MD|major depressive disorder|C0041696;C1269683|||||1|0.0021|  
MD|malate  
dehydrogenase|C0024544;C0373676|||C0024544;C0373676|CHV;CSP;LCH;LNC;MSH;MTH;NDFR  
T;SNOMEDCT|||1  
MD|malignant disease|C0442867|||C0442867|CHV;SNOMEDCT|||  
MD|malrotation of duodenum|||||||1  
MD|mammary dysplasia|C0016034|||||||1  
MD|mandibular|C0024687|||||||1  
MD|manic depression|C0005586|||||||1  
MD|manic depressive|C0005586|||C0005586|CHV|||  
MD|manic-depressive|C0005586|||||||1  
MD|maryland|C0024858|||C0024858|CHV|||  
MD|maternal deprivation|C0024920|||C0024920|CHV;LCH;MSH;SNOMEDCT|1|0.0056|1  
MD|maximal dose|||||||1  
MD|mean defect|||||||1|0.018|  
MD|mean deviation|C1828170|||C1828170|SNOMEDCT|||1  
MD|mean diastolic|||||||1  
MD|mean difference|||||||1|0.0116|  
MD|measurable disease|C1513041|||||||1  
MD|medial dorsal|||||||1|0.0043|  
MD|medial dorsal nucleus|C0228329;C1284630|||C0228329|CHV|||  
MD|medialis dorsalis|||||||1|0.0043|1  
MD|median|C0549183;C0876920;C2347635;C2348144;C2939193|||||||1  
MD|mediastinal disease|C0025061|||C0025061|CHV;MSH;NCI;SNOMEDCT|||1  
MD|medical department|C0587450|||C0587450|CHV;MTH;SNOMEDCT|||1  
MD|medical doctor|C0031831|1|1|1.000|||1  
MD|mediodorsal|||||||1|0.0223|1  
MD|mediodorsal nucleus of the thalamus|||||||1|0.0141|  
MD|mediodorsal thalamic nucleus|C0228329|||||||1|0.0167|  
MD|mediodorsal thalamus|||||||1|0.0043|  
MD|medium dosage|||||||1  
MD|megadaltons|||||||1|0.0128|  
MD|menadione|C0025270|||||||1|0.0064|  
MD|mendelevium|C0025275|||||||1  
MD|meningococcal disease|C0025303|||||||1  
MD|mental deficiency|C0917816|||C0917816|AOD;CHV;COSTAR;CST;MSH;MTH;OMIM|||1  
MD|mental depression|C0011570|||C0011570|CHV;MTH|||1  
MD|mentally deficient|C0079822|||||||1  
MD|mesiodistal|||||||1  
MD|methylchloroarsine|C0168004|||||||1  
MD|methyl dopa|C0025741|||||||1|0.0039|  
MD|microdensitometry|||||||1|0.0081|  
MD|microdialysis|C0206056|||||||1|0.0201|  
MD|microtube dilution|||||||1  
MD|microvessel density|||||||1|0.0047|  
MD|minimum dosage|||||||1  
MD|mitral disease|C0865573|||C0865573|MTHICD9|||1  
MD|mixed diet|||||||1  
MD|moderate disability|||||||1|0.0026|1  
MD|moderately differentiated|||||||1|0.0039|1  
MD|moldavia|C0026374|||C0026374|CHV|||  
MD|moldova|C0026374|||C0026374|CHV|||  
MD|molecular dynamics|C0596957|||||||1|0.3448|  
MD|molecular dynamics simulations|C2717775|||||||1|0.0056|

MD|monocular deprivation|||||1  
MD|monocularly deprived|||||1|0.0086|  
MD|motion-defined|||||1|0.0047|  
MD|movement disorder|C0026650|||C0026650|CHV;COSTAR;CSP;CST;MSH;SNOMEDCT|||1  
MD|multiple deficiency|||||1  
MD|multiple dendritic|||||1|0.0039|  
MD|multiple dose|||||1  
MD|muscular dystrophies|C0026850|||C0026850|CHV|||  
MD|muscular  
dystrophy|C0026850|||C0026850|AOD;CHV;COSTAR;CSP;LCH;MEDLINEPLUS;MSH;MTH;NCI;NDF  
RT;OMIM;SNOMEDCT|1|0.0291|1  
MD|myelin-deficient|||||1|0.0223|  
MD|myelodysplasia|C0026985;C0026986;C0033027|||C0026985;C0026986;C0033027;C19630  
99|CHV;COSTAR;DXP;MTH;MTHICD9;NCI;OMIM;PDQ;SNOMEDCT|||  
MD|myeloproliferative disease|C0027022|||||1  
MD|myocardial damage|||||1  
MD|myocardial disease|C0878544|||C0878544|CHV;CSP;MSH;MTHICD9;SNOMEDCT|||1  
MD|myodystrophy|C0026850|||C0026850|CHV|||  
MD|myotonic  
dystrophy|C0027126|||C0027126|CHV;COSTAR;CSP;MSH;MTH;MTHICD9;NCI;NDFRT;SNOMEDCT|  
1|0.0638|1  
MD|patients with Meniere's disease|||||1|0.0077|  
MD|progressive muscular dystrophy|C0026850|||C0026850|CHV|||  
MD|thalamic mediodorsal nucleus|||||1|0.0081|  
MDS|CHROMOSOME 17p13.3 DELETION SYNDROME|C0265219|||C0265219|OMIM|||  
MDS|Dysmyelopoietic Syndrome|C0026986|||C0026986|MSH;NCI|||  
MDS|Dysmyelopoietic Syndromes|C0026986|||C0026986|MSH;MTH;NDFRT|||  
MDS|Dysmyelopoietic syndrome|C0026986|||C0026986|SNOMEDCT|||  
MDS|Hematopoietic - Myelodysplastic Syndrome (MDS)|||C0026986|NCI|||  
MDS|LIS1|C1418245;C1843916;C2698684|||C2698684|NCI|||  
MDS|LIS2|C0796089;C1418248;C2698684|||C2698684|NCI|||  
MDS|Lissencephaly Syndrome, Miller Dieker|C0265219|||C0265219|MSH|||  
MDS|Lissencephaly Syndrome, Miller-Dieker|C0265219|||C0265219|MSH|||  
MDS|Lissencephaly syndrome|C0265219|||C0265219|SNOMEDCT|||  
MDS|Lissencephaly, Miller Dieker|C0265219|||C0265219|MSH|||  
MDS|Lissencephaly, Miller-Dieker|C0265219|||C0265219|MSH|||  
MDS|MDCR|C1855481;C2698684|||C2698684|NCI|||  
MDS|MDLS|C0265219|||C0265219|OMIM|||  
MDS|MDS|||C0026986;C0265219;C1879299;C2698684|LNC;NCI;OMIM|||  
MDS|MDS - Myelodysplastic syndrome|C0026986|||C0026986|SNOMEDCT|||  
MDS|MILLER-DIEKER LISSENCEPHALY SYNDROME|C0265219|||C0265219|OMIM|||  
MDS|MYELODYSPLASTIC SYNDROME|C0026986;C0033027|||C0026986|COSTAR|||  
MDS|Miller Dieker Syndrome|C0265219|||C0265219|MSH|||  
MDS|Miller Dieker syndrome|C0265219|||C0265219|MTH;SNOMEDCT|||  
MDS|Miller Dieker syndrome (disorder)|||C0265219|SNOMEDCT|||  
MDS|Miller-Dieker Lissencephaly|C0265219|||C0265219|MSH|||  
MDS|Miller-Dieker Lissencephaly Syndrome|C0265219|||C0265219|MSH|||  
MDS|Miller-Dieker Syndrome|C0265219|||C0265219|MSH|||  
MDS|Miller-Dieker Syndrome Chromosome Region Gene|C2698684|||C2698684|NCI|||  
MDS|Miller-Dieker lissencephaly syndrome|C0265219|||C0265219|SNOMEDCT|||  
MDS|Miller-Dieker syndrome|C0265219|||C0265219|MTHICD9;SNOMEDCT|||  
MDS|Miller-Dieker syndrome (disorder)|||C0265219|SNOMEDCT|||  
MDS|Miller-Dieker syndrome (disorder) [Ambiguous)|||C0265219|SNOMEDCT|||  
MDS|Minimum Data Set, 2.0|C1879299|||C1879299|MTH|||  
MDS|Minimum data set|C1879299|||C1879299|LNC|||  
MDS|Myelodysplasia|C0026985;C0026986;C0033027|||C0026986|NCI;OMIM;SNOMEDCT|||  
MDS|Myelodysplasia (disorder)|||C0026986|SNOMEDCT|||

MDS|Myelodysplastic Neoplasm|C0026986|||C0026986|NCI|||  
MDS|Myelodysplastic Syndrome|C0026986;C0033027|||C0026986|MSH;NCI|||  
MDS|Myelodysplastic Syndrome/Neoplasm|||C0026986|NCI|||  
MDS|Myelodysplastic Syndromes|C0026986;C0033027|||C0026986|MSH;NCI;NDFRT|||  
MDS|Myelodysplastic Syndromes [Disease/Finding]|||C0026986|NDFRT|||  
MDS|Myelodysplastic synd NOS|||C0026986|ICD9CM|||  
MDS|Myelodysplastic syndrome|C0026986;C0033027|||C0026986|NCI;OMIM;SNOMEDCT|||  
MDS|Myelodysplastic syndrome (clinical)|||C0026986|SNOMEDCT|||  
MDS|Myelodysplastic syndrome (disorder)|||C0026986|SNOMEDCT|||  
MDS|Myelodysplastic syndrome (morphologic abnormality)|||C0026986|SNOMEDCT|||  
MDS|Myelodysplastic syndrome (morphology)|||C0026986|SNOMEDCT|||  
MDS|Myelodysplastic syndrome (morphology) -Retired-|||C0026986|SNOMEDCT|||  
MDS|Myelodysplastic syndrome, NOS|C0026986;C0033027|||C0026986|SNOMEDCT|||  
MDS|Myelodysplastic syndrome, unspecified|C0026986|||C0026986|ICD9CM;SNOMEDCT|||  
MDS|Myelodysplastic syndromes|C0026986;C0033027|||C0026986|PDQ|||  
MDS|Oligoblastic Leukemia|C0026986|||C0026986|NCI|||  
MDS|PAFAH|C1418245;C1418625;C2698684|||C2698684|NCI|||  
MDS|PAFAH1B1 wt Allele|C2698684|||C2698684|MTH;NCI|||  
MDS|PRELEUKEMIC SYNDROME|C0026986|||C0026986|DXP|||  
MDS|Platelet-Activating Factor Acetylhydrolase, Isoform Ib, Alpha Subunit (45kD) Gene|||C2698684|NCI|||  
MDS|Platelet-Activating Factor Acetylhydrolase, Isoform Ib, Alpha Subunit 45kDa wt Allele|C2698684|||C2698684|NCI|||  
MDS|Preleukaemia|C0026986;C0033027|||C0026986|SNOMEDCT|||  
MDS|Preleukaemic syndrome|C0026986|||C0026986|SNOMEDCT|||  
MDS|Preleukemia|C0026986;C0033027|||C0026986|LCH;NCI;SNOMEDCT|||  
MDS|Preleukemic syndrome|C0026986|||C0026986|SNOMEDCT|||  
MDS|Smoldering Leukemia|C0002894;C0026986|||C0026986|NCI|||  
MDS|Smoldering leukaemia|C0002894;C0026986|||C0026986|SNOMEDCT|||  
MDS|Smoldering leukaemia|C0002894;C0026986|||C0026986|SNOMEDCT|||  
MDS|Syndrome, Dysmyelopoietic|C0026986|||C0026986|MSH|||  
MDS|Syndrome, Miller-Dieker|C0265219|||C0265219|MSH|||  
MDS|Syndrome, Miller-Dieker Lissencephaly|C0265219|||C0265219|MSH|||  
MDS|Syndrome, Myelodysplastic|C0026986;C0033027|||C0026986|MSH|||  
MDS|Syndromes, Dysmyelopoietic|C0026986|||C0026986|MSH|||  
MDS|Syndromes, Myelodysplastic|C0026986;C0033027|||C0026986|MSH|||  
MDS|[M]Myelodysplastic syndrome|||C0026986|SNOMEDCT|||  
MDS|[X]Myelodysplastic syndrome, unspecified|||C0026986|SNOMEDCT|||  
MDS|[X]Myelodysplastic syndrome, unspecified (disorder)|||C0026986|SNOMEDCT|||  
MDS|dysmyelopoiesis|C0026986|||C0026986|PDQ|||  
MDS|lissencephaly syndrome|C0265219|||C0265219|CHV|||  
MDS|maternal deprivation syndrome|||1  
MDS|medical data screen|||1  
MDS|medical data system|||1  
MDS|membrane-spanning domain|||1  
MDS|microdebrider system|||1  
MDS|microdialysis system|||1|0.0096|  
MDS|microdilution system|||1  
MDS|microsurgical drill system|||1  
MDS|milk drinker's syndrome|C0026141|||1  
MDS|miller dieker syndrome|C0265219|||C0265219|CHV|||  
MDS|miller-dieker syndrome|C0265219|||C0265219|CHV|||  
MDS|minimum data set|C1879299|||1|0.0527|1  
MDS|multidimensional scaling|C0681930|||1|0.0431|1  
MDS|multilineage dysplasia|||1|0.002|||  
MDS|myelodysplasia|C0026985;C0026986;C0033027|||C0026986|CHV;NCI;PDQ|||  
MDS|myelodysplastic|||1|0.007|

MDS|myelodysplastic syndrome|C0026986;C0033027|1|0.998|C0026986;C0033027|CHV;COSTAR;MSH;NCI;OMIM;SNO MEDCT|1|0.8756|1  
MDS|myelodysplastic syndromes|C0026986;C0033027|||C0026986|CHV;NCI;PDQ|||  
MDS|myocardial depressant substance|||1  
MDS|patients with myelodysplasia|||1|0.007|  
MDS|physicians|C0031831|||1|0.005|  
MDS|preleukemia|C0026986;C0033027|||C0026986|NCI;PDQ|||  
MDS|smoldering leukemia|C0002894;C0026986|||C0026986|NCI|||  
MFM|Millipore filter method|||1  
MFM|magnetic force microscope|||1  
MFM|magnetic force microscopy|||1  
MFM|maternal fetal medicine|C1555790|1|1.000|||1  
MFM|maternal-fetal medicine|C1555790|||1|0.4737|  
MFM|multifidus muscle|C0224319|||1  
MFM|myofibrillar myopathy|C2678065|||1|0.5263|  
MICD|MHC class I polypeptide-related sequence D (pseudogene)|||C1417165|HUGO|||  
MICD|MICD|C1417165|||C1417165|HUGO|||  
MICD|MICD gene|C1417165|||C1417165|HUGO;MTH|||  
MICD|PERB11.4|C1417165|||C1417165|HUGO|||  
MICD|mental illness chemical dependency||1|1.000|||1  
MI|AMI|||C0027051|AOD;CHV|||  
MI|ATTACK CORONARY|||C0027051|CST|||  
MI|ATTACK HEART (NOS)|C0027051|||C0027051|CST|||  
MI|Attack - heart|C0027051|||C0027051|SNOMEDCT|||  
MI|Cardiac infarction|C0027051|||C0027051|SNOMEDCT|||  
MI|Cardiac infarction, NOS|C0027051|||C0027051|SNOMEDCT|||  
MI|HEART ATTACK|C0027051|||C0027051|CST;DXP|||  
MI|HEART INFARCTION|C0027051|||C0027051|DXP|||  
MI|Heart Attack|C0027051|||C0027051|MEDLINEPLUS;NCI|||  
MI|Heart attack|C0027051|||C0027051|SNOMEDCT|||  
MI|Heart attack, NOS|C0027051|||C0027051|SNOMEDCT|||  
MI|History of Myocardial Infarction Within 6 Months|||C0278960|NCI|||  
MI|History of myocardial infarction within 6 months|||C0278960|MTH|||  
MI|INFARCT MYOCARDIAL|||C0027051|CST|||  
MI|INFARCTION (MI), MYOCARDIAL|C0027051|||C0027051|NCI|||  
MI|Infarct, Myocardial|C0027051|||C0027051|MSH|||  
MI|Infarction of heart|C0027051|||C0027051|SNOMEDCT|||  
MI|Infarction of heart, NOS|C0027051|||C0027051|SNOMEDCT|||  
MI|Infarction, Myocardial|C0027051;C2926063|||C0027051|MSH|||  
MI|Infarctions, Myocardial|C0027051|||C0027051|MSH|||  
MI|Infarcts, Myocardial|C0027051|||C0027051|MSH|||  
MI|MALAWI|C0024548|||C0024548|NCI|||  
MI|MI|C2346914|||C0024548;C0025939;C0025953;C0027051;C0278960;C0332288;C1417172; C2346914|CHV;CSP;HUGO;MEDLINEPLUS;MSH;NCI;OMIM;PDQ;SNOMEDCT|||  
MI|MI - Myocardial infarction|C0027051|||C0027051|SNOMEDCT|||  
MI|MI, MYOCARDIAL INFARCTION|C0027051|||C0027051|NCI|||  
MI|MICROBIOL|||C0025953|MSH|||  
MI|MICROPHthalmia, MOUSE, HOMOLOG OF|||C1417172|OMIM|||  
MI|MICROPHthalmia-ASSOCIATED TRANSCRIPTION FACTOR|C0218694;C1417172|||C1417172|OMIM|||  
MI|MITF|C1417172|||C1417172|HUGO;NCI;OMIM|||  
MI|MITF Gene|C1417172|||C1417172|NCI|||  
MI|MITF gene|C1417172|||C1417172|HUGO;MTH|||  
MI|MITF wt Allele|C2346914|||C2346914|MTH;NCI|||  
MI|MW|C0024548;C0026385;C0556966|||C0024548|NCI|||  
MI|MWI|C0024548|||C0024548|NCI|||

MI|MYOCARDIAL INFARCT|C0027051|||C0027051|CST|||  
MI|MYOCARDIAL INFARCTION|C0027051;C2926063|||C0027051|COSTAR;CST;NCI|||  
MI|MYOCARDIAL INFARCTION, (MI)|C0027051;C2926063|||C0027051|NCI|||  
MI|Magical Ideation|||1|0.0067|  
MI|Malawi|C0024548|||C0024548|AOD;LCH;MSH;MTH;NCI;SNOMEDCT|||  
MI|Malawi (geographic location)|||C0024548|SNOMEDCT|||  
MI|Mebi|C1553043|||C1553043|MTH;NCI|||  
MI|Meiosis I|C1155812|||1|0.0152|  
MI|Metabolic Intermediate|||1|0.0079|  
MI|Mi|C2346914|||C1553043|NCI|||  
MI|Michigan|C0025939|||C0025939|AOD;LCH;MSH;NCI;SNOMEDCT|||  
MI|Michigan (geographic location)|C0025939|||C0025939|MTH;SNOMEDCT|||  
MI|Microbiological|C0025953|||C0025953|MTH|||  
MI|Microphthalmia-Associated Transcription Factor Gene|C1417172|||C1417172|NCI|||  
MI|Microphthalmia-Associated Transcription Factor wt Allele|C2346914|||C2346914|NCI|||  
MI|Minus|C0332288|||C0332288|SNOMEDCT|||  
MI|Myocardial Infarct|C0027051|||C0027051|MSH;NCI;NDFRT|||  
MI|Myocardial Infarction|C0027051;C2926063|||C0027051|MEDLINEPLUS;MSH;MTH;NCI;NDFRT|||  
MI|Myocardial Infarction [Disease/Finding]|||C0027051|NDFRT|||  
MI|Myocardial Infarctions|C0027051|||C0027051|MSH;MTH|||  
MI|Myocardial Infarcts|C0027051|||C0027051|MSH|||  
MI|Myocardial infarct|C0027051|||C0027051|SNOMEDCT|||  
MI|Myocardial infarction|C0027051;C2926063|||C0027051|AIR;LNC;MEDLINEPLUS;NCI;OMIM;SNOMEDCT|||  
MI|Myocardial infarction (MI)|C0027051;C2926063|||C0027051|OMIM|||  
MI|Myocardial infarction (disorder)|||C0027051|SNOMEDCT|||  
MI|Myocardial infarction NOS|C0027051;C2926063|||C0027051|MTHICD9|||  
MI|Myocardial infarction, NOS|C0027051;C2926063|||C0027051|SNOMEDCT|||  
MI|Nyasaland|C0024548|||C0024548|MSH|||  
MI|Republic of Malawi|C0024548|||C0024548|MSH|||  
MI|WS2A|||C2346914|NCI|||  
MI|Without|||C0332288|MTH;NCI;SNOMEDCT|||  
MI|Without (attribute)|||C0332288|SNOMEDCT|||  
MI|after acute myocardial infarction|||1|0.0718|  
MI|attack hearts|C0027051|||C0027051|CHV|||  
MI|attacking heart|C0027051|||C0027051|CHV|||  
MI|attacks coronary|||C0027051|CHV|||  
MI|attacks hearts|||C0027051|CHV|||  
MI|bHLHe32|C0218694;C1417172;C2346914|||C1417172;C2346914|HUGO;NCI|||  
MI|cardiac infarction|C0027051|||C0027051|CHV|||  
MI|cardiac remodeling after myocardial infarction|||1|0.0061|  
MI|coronary attack|C0027051|||C0027051|CHV|||  
MI|disorder infarction myocardial|||C0027051|CHV|||  
MI|first meiotic division|||1|0.0043|  
MI|first meiotic metaphase|||1|0.003|  
MI|heart attack|C0027051|||C0027051|AOD;CHV;CSP|||  
MI|heart attacks|C0027051|||C0027051|CHV|||  
MI|heart infarction|C0027051|||C0027051|CHV|||  
MI|history of myocardial infarction within 6 months|||C0278960|PDQ|||  
MI|homolog of mouse microphthalmia|C1417172|||C1417172|HUGO|||  
MI|infarctions myocardial|||C0027051|CHV|||  
MI|infarcts myocardial|||C0027051|CHV|||  
MI|infection|C0021311|||1|0.0067|  
MI|intensity|C0522510|||1|0.0073|

MI|intervention|C0886296;C1273869;C1948041|||||1|0.0073|  
MI|macrophage migration inhibition|||||1|0.003|  
MI|magnetic-guided intubation|||||1|  
MI|malawi|C0024548|||C0024548|CHV|||  
MI|massa intermedia|C0228325;C1289610|||C0228325;C1289610|FMA;SNOMEDCT|||  
MI|maturation index|||||1|  
MI|mebi|C1553043|||C1553043|HL7V3.0|||  
MI|meconium ileus|C0270246;C0546982;C2939175|||||1|0.0134|1|  
MI|medical inspection|C0582103|||C0582103|NCI||||1|  
MI|meiosis I|C1155812|||||1|  
MI|melanophore index|||||1|  
MI|membrane intact|||||1|  
MI|menstruation induction|||||1|  
MI|mental illness|C0004936|||C0004936|AOD;CHV;CSP;MEDLINEPLUS;NCI;SNOMEDCT|||1|  
MI|mental institution|C0020021|||C0020021|MSH|||1|  
MI|mentally impaired|||||1|  
MI|mesenteric ischemia|C0920157|||||1|  
MI|mesioincisal|||||1|  
MI|metabolic index|||||1|  
MI|metabolic inhibition|C0021469|||||1|0.0225|  
MI|metaphase I|||||1|0.0517|  
MI|methyl indole|||||1|  
MI|michigan|C0025939|||C0025939|CHV|||  
MI|microbiology|C0025952;C0025953;C0085672|||C0025953|MSH|||  
MI|microphthalmia-associated transcription factor|C0218694;C1417172|||C1417172|HUGO|||  
MI|microphthalmic|||||1|0.0061|  
MI|microsatellite instability|C0796369;C0920269|||||1|0.0883|1|  
MI|mied|||C0027051|CHV|||  
MI|mies|C0027051|||C0027051|CHV|||  
MI|migration index|||||1|  
MI|migration inhibition|||||1|  
MI|mild irritant|||||1|  
MI|mile|C0331865;C2347127;C2348616|||||1|  
MI|minus|C0332288|||C0332288|CHV|||  
MI|mitotic|C1513354|||||1|0.011|  
MI|mitotic index|C0812425|||C0812425|CHV;LNC;MSH;NCI;SNOMEDCT|1|0.2106|1|  
MI|mitotic indices|C0812425|||||1|0.0158|  
MI|mitral incompetence|C0026266|||C0026266|CHV;MSH;NDFRT;SNOMEDCT|||1|  
MI|mitral insufficiency|C0026266|||C0026266|CHV;COSTAR;CST;DXP;MSH;NCI;NDFRT;OMIM;SNOMEDCT|1|0.0207|1|  
MI|mononucleosis infectiosa|||||1|  
MI|morphology index|||||1|  
MI|motility index|||||1|  
MI|motivational interviewing|C0683474|||||1|0.0256|  
MI|motor imagery|||||1|0.0085|  
MI|mouse microphthalmia|||||1|0.0061|  
MI|multiple imputation|||||1|0.0079|  
MI|mutual information|||||1|0.0225|  
MI|myo-inositol|C0021547|||C0021547|FMA;NCI;PDQ|||  
MI|myocardial infarct|C0027051|||||1|0.0298|  
MI|myocardial infarcted|||||1|0.0055|  
MI|myocardial infarction|C0027051;C2926063|1|1.000|C0027051|AOD;CHV;CSP|1|0.0079|1|  
MI|myocardial infarctions|C0027051|||C0027051|CHV|1|0.0292|  
MI|myocardial infarcts|C0027051|||C0027051|CHV|||

MI|myocardial  
ischemia|C0010054;C0151744|||C0010054;C0151744|AOD;CHV;CSP;CST;LNC;MSH;MTH;MTHIC  
D9;NDFRT;OMIM;SNOMEDCT|1|0.0274|1  
MI|myocardial necrosis|C0027051;C1442837|||C0027051|CHV|||  
MI|myoinositol|C0021547|||1|1  
MI|myometrial invasion|||1|0.0055|  
MI|nono|C0332288;C1417758|||C0332288|NCI|||  
MI|patients after myocardial infarction|||1|0.0329|  
MI|patients with acute myocardial infarction|||1|0.1223|  
MI|primary motor|||1|0.0158|  
MI|primary motor area|||1|0.0037|  
MI|primary motor cortex|C0026607|||1|0.0645|  
MI|syndrome myocardial infarction|C0027051|||C0027051|CHV|||  
MI|ventricular remodeling after myocardial infarction|||1|0.0055|  
MI|without|||C0332288|CHV|||  
MMF|DHAD/5-FU/MTX|||C0083765|NCI;PDQ|||  
MMF|Fluorouracil/Methotrexate/Mitoxantrone|||C0083765|NCI|||  
MMF|MMF|C0083765;C0209368|||C0083765;C0209368|NCI;PDQ|||  
MMF|MYCOPHENOLATE MOFETIL|C0209368|||C0209368|MTHSPL;NCI;NDFRT;VANDF|||  
MMF|Mycophenolate Mofetil|C0209368|||C0209368|MTHSPL;NCI;USPMG|||  
MMF|Mycophenolate mofetil|C0209368|||C0209368|MTHSPL;SNOMEDCT|1|0.9232|  
MMF|Mycophenolate mofetil (product)|||C0209368|SNOMEDCT|||  
MMF|Mycophenolate mofetil (substance)|||C0209368|SNOMEDCT|||  
MMF|NMF|C0066373;C0083765;C1882111|||C0083765|NCI;PDQ|||  
MMF|NMF protocol|C0083765|||C0083765|MSH|||  
MMF|fluorouracil/methotrexate/mitoxantrone|||C0083765|PDQ|||  
MMF|fluorouracil/methotrexate/mitoxantrone protocol|C0083765|||C0083765|MTH|||  
MMF|fraction|C1264633;C1554103|||1|0.0093|  
MMF|macrophagic myofasciitis|C2931639|||C2931639|MSH|1|0.0114|  
MMF|mandibulomaxillary fixation|||1|1  
MMF|maxillomandibular fixation|C0376509|||C0376509|MSH|1|0.0342|1  
MMF|maximal midexpiratory flow|||1|1  
MMF|maximal midexpiratory flow  
rate|C0024966;C1306018|||C0024966;C1306018|AOD;MSH;MTH|||  
MMF|maximum mid-expiratory flow|||1|0.0041|  
MMF|mean maximal flow|||1|1  
MMF|mismatch field|||1|0.0176|  
MMF|mofetil mycophenolate|C0209368|||C0209368|CHV|||  
MMF|monomethylformamide|C0066373|||C0066373|MSH;NCI;PDQ|||  
MMF|monomethylfumarate|C0209986|||C0209986|MSH|||  
MMF|mycophenolate  
mofetil|C0209368|1|1.000|C0209368|CHV;CSP;MSH;MTH;MTHSPL;NCI;NDFRT;PDQ;RXNORM;SN  
OMEDCT;USPMG;VANDF|||  
MMF|mycophenolate mofetil [Chemical/Ingredient]|||C0209368|NDFRT|||  
MMF|mycophenolic acid morpholinoethyl ester|C0209368|||C0209368|CSP;MSH;NDFRT|||  
MN|BLOOD GROUP--MN LOCUS|C1367455|||C1367455|OMIM|||  
MN|CA IX|C1413052|||C1413052|OMIM|||  
MN|CA9|C1413052|||C1413052|HUGO;OMIM|||  
MN|CA9 gene|C1413052|||C1413052|HUGO;MTH|||  
MN|CAIX|C1413052|||C1413052|HUGO|||  
MN|CARBONIC ANHYDRASE IX|C1413052|||C1413052|OMIM|||  
MN|CD235a|C0017955;C1367455|||C1367455|HUGO;LNC|||  
MN|Dietary Manganese|C2348271|||C2348271|MTH;NCI|||  
MN|GPA|||C1367455;C1706550|HUGO;NCI|||  
MN|GYPA|||C1367455;C1706550|HUGO;NCI;OMIM|||  
MN|GYPA Gene|C1367455|||C1367455|NCI|||  
MN|GYPA gene|C1367455|||C1367455|HUGO;MTH|||

MN|GYPA wt Allele|C1706550|||C1706550|MTH;NCI|||  
MN|Glycophorin A (Includes MN Blood Group) Gene|||C1367455|NCI|||  
MN|Glycophorin A (Includes MN Blood Group) wt Allele|||C1706550|NCI|||  
MN|MANGANESE|C0024706;C2348271|||C0024706;C2348271|MTHSPL;NCI;NDFRT;VANDF|||  
MN|MC|||C0026405|NCI|||  
MN|MCO|C0026405;C0605527;C1417073|||C0026405|NCI|||  
MN|MEMBRANE ANTIGEN MN|C1413052|||C1413052|OMIM|||  
MN|MG|C1960952;C2346927|||C0026410|NCI|||  
MN|MN|||C0024706;C0026183;C0026405;C0026410;C1367455;C1413052;C1706550|HUGO;LNC  
;NCI;OMIM|||  
MN|MNG|C0025800;C0026410|||C0026410|NCI|||  
MN|MNS|C0025237;C1415376;C1706550|||C1706550|NCI|||  
MN|MONACO|C0026405|||C0026405|NCI|||  
MN|MONGOLIA|C0026410|||C0026410|NCI|||  
MN|Manganese|C0024706;C2348271|||C0024706;C2348271|LCH;LNC;MSH;MTH;MTHSPL;NCI;ND  
FRT;RXNORM;SNOMEDCT;USPMG|||  
MN|Manganese (product)|||C0024706|SNOMEDCT|||  
MN|Manganese (substance)|||C0024706|SNOMEDCT|||  
MN|Manganese [Chemical/Ingredient]|||C0024706|NDFRT|||  
MN|Manganese, NOS|C0024706;C2348271|||C0024706|SNOMEDCT|||  
MN|Mauthner neurons|||1|0.0049|  
MN|Melanocytic nevi|C0027962|||1|0.0103|  
MN|Membranous nephropathy|C0017665|||1|0.0955|  
MN|Minnesota|C0026183|1|1.000|C0026183|AOD;LCH;MSH;MTH;NCI;SNOMEDCT|||  
MN|Minnesota (geographic location)|||C0026183|SNOMEDCT|||  
MN|Mn|||C0024706;C2348271|AOD;NCI|||  
MN|Mn - Manganese|C0024706|||C0024706|SNOMEDCT|||  
MN|Mn element|C0024706|||C0024706|CSP|||  
MN|Monaco|C0026405|||C0026405|AOD;MSH;MTH;NCI;SNOMEDCT|||  
MN|Monaco (geographic location)|||C0026405|SNOMEDCT|||  
MN|Mongolia|C0026410|||C0026410|AOD;LCH;MSH;MTH;NCI;SNOMEDCT|||  
MN|Mongolia (geographic location)|||C0026410|SNOMEDCT|||  
MN|RCC-associated protein G250|||C1413052|HUGO|||  
MN|blood group in MNS blood group system|||1|  
MN|blood monocytes|C0026473|||1|0.006|  
MN|carbonic anhydrase IX|C1413052|||C1413052|HUGO|||  
MN|carbonic dehydratase|C1413052;C1538425|||C1413052|HUGO|||  
MN|glycophorin A (MNS blood group)|||C1367455|HUGO|||  
MN|malignant nephrosclerosis|C0238307|||1|  
MN|manganese|C0024706;C2348271|||C0024706|AOD;CHV;CSP|1|0.2704|1|  
MN|meal number|||1|0.0049|  
MN|median  
nerve|C0025058;C1278845|||C0025058;C1278845|CHV;FMA;LCH;MSH;NCI;SNOMEDCT;UWDA|1|  
0.0141|1|  
MN|meganewton|||1|  
MN|melanocytic  
nevus|C0027962;C1456781|||C0027962;C1456781|CHV;MSH;MTH;NCI;SNOMEDCT|||1|  
MN|melena neonatorum|||1|  
MN|membranous nephropathy|C0017665|||C0017665|CHV;CSP;MSH;NDFRT|||1|  
MN|membranous neuropathy|||1|  
MN|mental nerve|C0228739;C1281199|||1|0.0054|  
MN|mesenteric node|C0229792|||C0229792|CHV;FMA;UWDA|||1|  
MN|metanephrine|C0025562|||C0025562|AOD;CHV;CSP;LNC;MSH;MTH;NDFRT;SNOMEDCT|||1|  
MN|methyl nicotinate|C0066412|||1|0.0087|  
MN|micrococcal nuclease|C0025965|||1|0.006|  
MN|micronucleated|||1|  
MN|micronuclei|C0026004|||1|0.2839|

MN|micronucleus|C0026004|||C0026004|AOD;CHV;CSP;GO;SNOMEDCT|1|0.2204|1  
MN|micronucleus assay|C0026006|||1|0.0049|  
MN|micronucleus test|C0026006|||1|0.0043|  
MN|midnight|C0332172|||C0332172|CHV;SNOMEDCT|||1  
MN|millinormal|||1  
MN|minnesota|C0026183|||C0026183|CHV|||  
MN|monaco|C0026405|||C0026405|CHV|||  
MN|mongolia|C0026410|||C0026410|CHV|||  
MN|mononuclear|C1513475|||1  
MN|mononuclear cells|C0806987|||1|0.0109|  
MN|motoneuron|C0026609|||1|0.0293|  
MN|motor neuron|C0026609|||C0026609|AOD;CHV;CSP;FMA;MSH;NCI;SNOMEDCT|1|0.0071|1  
MN|mucosal neurolysis|||1  
MN|multinodular|C0205416|||1  
MN|myoneural|||1  
MN|nucleus|C0007610|||1|0.0076|  
MN|number average molecular weight|||1|0.0054|  
MOM|Miokamycin|C0026202|||1|0.064|  
MOM|MoM|C1442163|||C1442163|LNC;SNOMEDCT|||  
MOM|Multiple of the median|C1442163|||C1442163|SNOMEDCT|||  
MOM|Multiple of the median (qualifier value)|||C1442163|SNOMEDCT|||  
MOM|metal-on-metal|||1|0.0542|  
MOM|midecamycin acetate|C1136781|||1|0.0493|  
MOM|milk of magnesia|C0591789|1|0.114|||1  
MOM|miocamycin|C0026202|||1|0.0739|  
MOM|modifier of Min|||1  
MOM|mother|C0026591|||1  
MOM|mucoid otitis media|C0029883|||1|0.0443|1  
MOM|multiple of the median|C1442163|||C1442163|LNC|||  
MOM|multiples of median|1|0.878|||1  
MOM|multiples of the median|||1|0.7143|  
MP|(device) MP||1|0.010|||1  
MP|(drug) MP||1|0.004|||1  
MP|1,7-Dihydro-6H-purine-6-thione|||C0000618|MSH;NCI;NDFRT;PDQ|||  
MP|1,7-Dihydro-6H-purine-6-thione Monohydrate|||C0000618|NCI;PDQ|||  
MP|3-mercaptopropionic acid|C0000424|||C0000424|MSH;NDFRT|1|0.0091|  
MP|3H-Purine-6-thiol|C0000618|||C0000618|NCI;PDQ|||  
MP|6 MP|C0000618|||C0000618|NCI|||  
MP|6 Mercaptopurine|C0000618|||C0000618|MSH|||  
MP|6 Thiohypoxanthine|C0000618|||C0000618|MSH;NCI;PDQ|||  
MP|6 Thiopurine|C0000618|||C0000618|MSH;NCI;PDQ|||  
MP|6 mercaptopurine|C0000618|||C0000618|CHV;CSP|||  
MP|6 thiopurine|C0000618|||C0000618|CSP|||  
MP|6-MP|C0000618|||C0000618|NCI;PDQ;SNOMEDCT|||  
MP|6-Mercaptopurine|C0000618|||C0000618|MSH;NCI;NDFRT;SNOMEDCT|||  
MP|6-Mercaptopurine [Chemical/Ingredient]|||C0000618|NDFRT|||  
MP|6-Purinethiol|C0000618|||C0000618|NCI;PDQ|||  
MP|6-Thiohypoxanthine|C0000618|||C0000618|MSH;NDFRT|||  
MP|6-Thiopurine|C0000618|||C0000618|MSH;NCI;NDFRT;PDQ|||  
MP|6-Thioxopurine|C0000618|||C0000618|NCI;PDQ|||  
MP|6-mercaptopurine|C0000618|||C0000618|CHV;PDQ|1|0.0085|  
MP|6-mp|C0000618|||C0000618|CHV|||  
MP|6-thiopurine|C0000618|||C0000618|CHV|||  
MP|6H-Purine-6-thione, 1,7-dihydro-|||C0000618|MSH;NDFRT|||  
MP|6H-Purine-6-thione, 1,7-dihydro- (9CI)|||C0000618|NCI;PDQ|||  
MP|6MP|C0000618|||C0000618|PDQ|||  
MP|6MP - Mercaptopurine|C0000618|||C0000618|SNOMEDCT|||

MP|7-Mercapto-1,3,4,6-tetrazaindene|||C0000618|NCI;PDQ|||  
MP|AP protocol 2|C0284383||C0284383|MSH|||  
MP|CQ|C1705968|||C0282245|NCI|||  
MP|L-PAM/PRED|||C0284383|NCI;PDQ|||  
MP|MAURITIUS|C0024944||C0024944|NCI|||  
MP|MERCAPTOPURINE|C0000618||C0000618|MTHSPL;NCI;NDFRT;VANDF|||  
MP|MERCAPTOPURINE A 06|||C0000618|MSH|||  
MP|MNP|C0282245||C0282245|NCI|||  
MP|MP|||C0000618;C0024944;C0282245;C0284383|NCI;PDQ|||  
MP|MPH-P protocol|C0284383||C0284383|MSH|||  
MP|MU|C0347978|||C0024944|NCI|||  
MP|MUS|C0024944;C0026809||C0024944|NCI|||  
MP|Matching pursuit|||1|0.0073|  
MP|Mauritius|C0024944||C0024944|AOD;LCH;MSH;MTH;NCI;SNOMEDCT|||  
MP|Mauritius (geographic location)|||C0024944|SNOMEDCT|||  
MP|Melphalan and prednisone|||1|0.0181|  
MP|Melphalan/Prednisone|||C0284383|NCI|||  
MP|Mercapto-6-purine|C0000618||C0000618|NCI;PDQ|||  
MP|Mercaptopurine|C0000618||C0000618|LNC;MSH;NCI;NDFRT;SNOMEDCT;USPMG|||  
MP|Mercaptopurine (product)|||C0000618|SNOMEDCT|||  
MP|Mercaptopurine (substance)|||C0000618|SNOMEDCT|||  
MP|Mercapurin|C0000618||C0000618|NCI;PDQ|||  
MP|Mern|C0000618||C0000618|NCI;PDQ|||  
MP|Methyl palmoxirate|C0127952|||1|0.0121|  
MP|Mibelli porokeratosis|C0949506|||1|  
MP|Mononuclear phagocytes|||1|0.0175|  
MP|Mycoplasma pneumoniae|C0026941;C0032302|||1|0.0284|  
MP|NORTHERN MARIANA ISLANDS|C0282245||C0282245|NCI|||  
MP|Northern Mariana Islands|C0282245||C0282245|AOD;MSH;MTH;NCI|||  
MP|Purine, 6-mercapto-|C0000618||C0000618|NCI|||  
MP|Purine-6-thiol (8CI)|||C0000618|NCI;PDQ|||  
MP|machine perfusion|||1|0.0103|  
MP|machine preservation|||1|  
MP|macrophage|C0024432||C0024432|AOD;CHV;CSP;FMA;MSH;MTH;NCI;SNOMEDCT|1|0.0066|  
1  
MP|macrophages|C0024432;C1546706;C1550652||C0024432;C1546706;C1550652|CHV;HL7V2  
.5;HL7V3.0;LCH;LNC;MSH|||  
MP|macular pigment|||1|0.0193|  
MP|magnetization prepared|||1|  
MP|main process|||1|0.0054|  
MP|malignant pyoderma|C0263211|||1|  
MP|mannoprotein|||1|0.0097|  
MP|mastoparan|C0065739||C0065739|MSH|1|0.0139|  
MP|matrix protein|||1|  
MP|mauritius|C0024944||C0024944|CHV|||  
MP|maximum parsimony|||1|0.0375|  
MP|mean pressure|C0445074||C0445074|SNOMEDCT|||1|  
MP|mechanical percussion|||1|  
MP|mechanical percussor|||1|  
MP|meconium peritonitis|C0270250|||1|0.0066|  
MP|medial plantar|||1|  
MP|melphalan-prednisone|||1|0.0066|  
MP|melphalan/prednisone|||C0284383|PDQ|||  
MP|melphalan/prednisone protocol|C0284383||C0284383|MTH|||  
MP|melting point|C1881775||C1881775|NCI|||1|  
MP|melting points|||1|0.003|  
MP|membrane potential|C0025251||C0025251|AOD;CHV;CSP;MSH;NCI|1|0.0568|1

MP|membrane protein|C0025252|||C0025252|CHV;CSP;MSH;NCI;NDFRT|||  
MP|menstrual  
period|C0025329;C0025344|1|0.002|C0025329;C0025344|MEDLINEPLUS;NCI|||1  
MP|mentum posterior|||||||1  
MP|mercaptopurine|C0000618|1|0.214|C0000618|CHV;LNC;MSH;MTH;MTHSPL;NCI;NDFRT;PDQ  
;RXNORM;SNOMEDCT;USPMG;VANDF|1|0.0169|  
MP|mesangial proliferative||1|0.002|||||  
MP|mesenteric panniculitis|C0025470|||||||1  
MP|mesial pit|||||||1  
MP|mesiopulpal|||||||1  
MP|metabolic panel||1|0.024|||||  
MP|metacarpophalangeal||1|0.358|||1|0.0471|1  
MP|metalloproteinase|C0025543|||C0025543;C1150172|CHV;CSP;NCI;SNOMEDCT|1|0.0066|  
MP|metarsophalangeal||1|0.012|||||  
MP|metatarsophalangeal||1|0.110|||1|0.0103|1  
MP|metatarsophalangeal/metacarpophalangeal||1|0.210|||||  
MP|methapyrilene|C0025625|||C0025625|CHV;LNC;MSH;MTH;NCI;NDFRT;RXNORM;SNOMEDCT;V  
ANDF|1|0.0127|  
MP|methyl parathion|C0025709|||C0025709|CHV;LNC;MSH;NDFRT;SNOMEDCT|1|0.0181|  
MP|methyl prednisolone|C0025815|||||1|0.006|  
MP|methylphenidate|C0025810|||C0025810|AOD;CHV;CSP;LNC;MSH;MTHSPL;NCI;NDFRT;RXNO  
RM;SNOMEDCT;USPMG;VANDF|1|0.0175|  
MP|methylphosphonate|C0066424|||C0066424|LNC;MSH|1|0.0066|  
MP|methylprednisolone|C0025815|||C0025815|CHV;CSP;LNC;MSH;MTHSPL;NCI;NDFRT;PDQ;R  
XNORM;SNOMEDCT;USPMG;VANDF|1|0.3245|  
MP|methylprednisolone sodium succinate|C0700546|||||1|0.0115|  
MP|microfibrillar protein|C0066514|||||||1  
MP|micronized progesterone|C0873071|||C0873071|CHV|1|0.0145|  
MP|microparticles|||||||1|0.0308|  
MP|microperoxidase|C0066521|||C0066521|MSH|1|0.006|  
MP|micturition pressure|||||||1|0.0048|  
MP|middle phalanx|C0576463|||C0576463|SNOMEDCT|||1  
MP|migration percentage|||||||1|0.0097|  
MP|military police||1|0.008|||||  
MP|millipond|||||||1  
MP|minimal pigment|||||||1  
MP|minipool|||||||1  
MP|mitral prolapse|||||||1|0.006|  
MP|modulator protein|||||||1  
MP|moist pack|||||||1  
MP|monitor pattern|||||||1  
MP|mononuclear phagocyte|C2952444|||C2952444|FMA|||  
MP|monophasic|C0205186|||||||1  
MP|monophosphate|||||||1  
MP|monopolar|||||||1|0.006|  
MP|motor potential|C0429441|||||||1|0.0133|1  
MP|mouth pressure|||||||1  
MP|mouthpiece|||||||1  
MP|movement protein|||||||1|0.0912|  
MP|mucopolysaccharide|C0017973;C2267150|||C0017973;C2267150|CHV;CSP;NDFRT;SNOMED  
CT|||1  
MP|multiparous|C0026751|||C0026751|CHV;SNOMEDCT|||1  
MP|multiprogrammable pacemaker|||||||1  
MP|muscle potential|||||||1  
MP|muscularis propria|C0225358|||||||1|0.0066|  
MP|mycoplasma pneumoniae pneumonia|C0032302|||||||1|0.003|  
MP|mycoplasmal pneumonia|C0032302|||C0032302|CHV;CSP;SNOMEDCT|||1

MP|myelopeptides|C0067043|||C0067043|MSH|||  
MP|myeloperoxidase|C0027021;C0440053;C1417245;C2698399|||C0027021;C0440053;C1417  
245;C2698399|CHV;CSP;HUGO;LNC;MSH;NCI;NDFRT;OMIM;SNOMEDCT|1|0.0085|  
MP|myenteric plexus|C0027028;C0038564;C1280770|||1|0.0066|  
MP|myocardial perfusion|C0428857|||1|0.0073|1  
MP|myosin phosphatase|C0067062|||1|0.0073|  
MP|peptide|C0030956|||1|0.0054|  
MP|peritoneal macrophages|C0206190|||1|0.0073|  
MP|proteins|C0033684|||1|0.0109|  
MRA|ANGIOGR MR|||C0243032|MSH|||  
MRA|Angiographies, MRI|C0243032|||C0243032|MSH|||  
MRA|Angiographies, Magnetic Resonance|C0243032|||C0243032|MSH|||  
MRA|Angiography, MRI|C0243032|||C0243032|MSH|||  
MRA|Angiography, Magnetic Resonance|C0243032|||C0243032|MSH|||  
MRA|Immunoglobulin G1, Anti-(Human Interleukin 6 Receptor) (Human-Mouse  
Monoclonal MRA Heavy Chain), Disulfide with Human-Mouse Monoclonal MRA .Kappa.-  
Chain, Dimer|||C1609165|NCI|||  
MRA|MR ANGIOGR|||C0243032|MSH|||  
MRA|MR angiography|||1|0.2323|  
MRA|MR arthrography|||1|0.0048|  
MRA|MRA|C0243032;C1609165|||C0243032;C1609165|NCI;SNOMEDCT|||  
MRA|MRI ANGIOGR|||C0243032|MSH|||  
MRA|MRI Angiographies|C0243032|||C0243032|MSH|||  
MRA|MRI Angiography|C0243032|||C0243032|MSH|||  
MRA|Magnetic Resonance Angiographies|C0243032|||C0243032|MSH|||  
MRA|Magnetic Resonance Angiography|C0243032|||C0243032|MSH;MTH|||  
MRA|Magnetic resonance angiography|C0243032|||C0243032|HL7V2.5;SNOMEDCT|||  
MRA|Magnetic resonance angiography (procedure)|||C0243032|SNOMEDCT|||  
MRA|Magnetic resonance angiography, NOS|C0243032|||C0243032|SNOMEDCT|||  
MRA|Magnetic resonance imaging (MRI) of vessels|C0243032|||C0243032|SNOMEDCT|||  
MRA|Magnetic resonance imaging of vessels|C0243032|||C0243032|SNOMEDCT|||  
MRA|Magnetic resonance imaging of vessels (procedure)|||C0243032|SNOMEDCT|||  
MRA|Multiple regression analysis|||1|0.015|  
MRA|TOCILIZUMAB|C1609165|||C1609165|NCI;NDFRT;VANDF|||  
MRA|Tocilizumab|C1609165|||C1609165|NCI;SNOMEDCT|||  
MRA|Tocilizumab (product)|||C1609165|SNOMEDCT|||  
MRA|Tocilizumab (substance)|||C1609165|SNOMEDCT|||  
MRA|Vascular MRI|C0243032|||C0243032|SNOMEDCT|||  
MRA|Vascular MRI (procedure)|||C0243032|SNOMEDCT|||  
MRA|Vascular magnetic resonance imaging|C0243032|||C0243032|SNOMEDCT|||  
MRA|Vascular magnetic resonance imaging (procedure)|||C0243032|SNOMEDCT|||  
MRA|activity|C0026606;C0205177;C0439167;C0441655;C1561536|||1|0.0095|  
MRA|atlizumab|C1609165|||C1609165|MSH|||  
MRA|magnetic resonance angiogram|||1|0.0082|1  
MRA|magnetic resonance angiograph||1|1.000|||1|  
MRA|magnetic resonance angiographic|||1|0.0068|  
MRA|magnetic resonance  
angiography|C0243032|||C0243032|CHV;HL7V2.5;MSH;MTH;SNOMEDCT|1|0.6635|1  
MRA|magnetic resonance angiography (MRA)|C0243032|||C0243032|CHV|||  
MRA|magnetic resonance arteriograph|||1|  
MRA|magnetic resonance arteriography|||1|0.0061|1  
MRA|magnetic resonance arteriogram|||1|  
MRA|magnetic resonance arthrography|||1|0.0095|  
MRA|main renal artery|||1|  
MRA|malignant rheumatoid arthritis|||1|0.0095|  
MRA|marrow repopulating ability|||1|0.0136|  
MRA|marrow repopulation activity|||1|

MRA|mesenteric resistance arteries|||||1|0.0123|  
MRA|midright atrium|||||1|  
MRA|monoclonal antibody, MRA|C1609165|||C1609165|MSH|||  
MRA|mra|C0243032;C1609165|||C0243032|CHV|||  
MRA|multivariate regression analysis|||||1|  
MRA|risk assessment|C0086930|||||1|0.0089|  
MRA|tocilizumab|C1609165|||C1609165|MSH;MTH;MTHSPL;RXNORM|||  
MRCP|Cholangiopancreatographies, Magnetic Resonance|C0994163|||C0994163|MSH|||  
MRCP|Cholangiopancreatography, Magnetic Resonance|C0994163|||C0994163|MSH|||  
MRCP|MAGNETIC RESONANCE CHOLANGIOPANCREATOGRAPHY  
(MRCP)|C0994163|||C0994163|HCPCS|||  
MRCP|MR cholangiopancreatography|||||1|0.2912|  
MRCP|MRCP - Magnetic resonance  
cholangiopancreatography|C0994163|||C0994163|SNOMEDCT|||  
MRCP|Magnetic Resonance Cholangiopancreatographies|C0994163|||C0994163|MSH|||  
MRCP|Magnetic Resonance Cholangiopancreatography|C0994163|||C0994163|MSH|||  
MRCP|Magnetic resonance cholangiography|||||1|0.0206|  
MRCP|Magnetic resonance  
cholangiopancreatography|C0994163|||C0994163|SNOMEDCT|1|0.6294|  
MRCP|Magnetic resonance cholangiopancreatography  
(procedure)|||C0994163|SNOMEDCT|||  
MRCP|magnetic resonance cholangiopancreatograph|1|1.000|||||1|  
MRCP|magnetic resonance  
cholangiopancreatography|C0994163|||C0994163|MSH;SNOMEDCT|||1|  
MRCP|mental retardation, cerebral palsy|||||1|  
MRCP|movement-related cortical potential|||||1|  
MRCP|movement-related cortical potentials|||||1|0.0588|  
MRCP|mrcp|||C0994163|HCPCS|||  
MRI|Imaging, Magnetic Resonance|C0024485;C1552358|||C0024485|MSH|||  
MRI|Imaging, NMR|C0024485|||C0024485|MSH|||  
MRI|MR - Magnetic resonance|C0024485|||C0024485|SNOMEDCT|||  
MRI|MR TOMOGR|||C0024485|MSH|||  
MRI|MR Tomography|C0024485|||C0024485|MSH|||  
MRI|MRI|C0024485|||C0024485|AOD;CHV;CSP;LNC;MSH;NCI;SNOMEDCT|||  
MRI|MRI - Magnetic resonance imaging|C0024485|||C0024485|SNOMEDCT|||  
MRI|MRI Scan|C0024485;C0917711|||C0024485|NCI|||  
MRI|MRI Scans|C0917711|||C0024485|MEDLINEPLUS|||  
MRI|MRI, NOS|C0024485|||C0024485|SNOMEDCT|||  
MRI|Magnetic Resonance  
Imaging|C0024485;C1552358|||C0024485|MEDLINEPLUS;MSH;MTH;NCI|||  
MRI|Magnetic Resonance Imaging Scan|C0024485|||C0024485|NCI|||  
MRI|Magnetic resonance  
imaging|C0024485;C1552358|||C0024485|CCS;LCH;MEDLINEPLUS;SNOMEDCT|||  
MRI|Magnetic resonance imaging (procedure)|||C0024485|SNOMEDCT|||  
MRI|Magnetic resonance imaging - action|C0024485|||C0024485|SNOMEDCT|||  
MRI|Magnetic resonance imaging - action (qualifier  
value)|||C0024485|SNOMEDCT|||  
MRI|Magnetic resonance imaging scan|C0024485|||||1|0.0004|  
MRI|Magnetic resonance imaging, NOS|C0024485;C1552358|||C0024485|SNOMEDCT|||  
MRI|Magnetic resonance study|C0024485|||C0024485|SNOMEDCT|||  
MRI|Magnetic resonance study (procedure)|||C0024485|SNOMEDCT|||  
MRI|Magnetic resonance technique|C0024485|||C0024485|SNOMEDCT|||  
MRI|Magnetic resonance: [imaging] or [study]|||C0024485|SNOMEDCT|||  
MRI|Magnetic resonance: [imaging] or [study] (procedure)|||C0024485|SNOMEDCT|||  
MRI|Medical Imaging, Magnetic Resonance / Nuclear Magnetic  
Resonance|||C0024485|NCI|||  
MRI|NMR|C0024485;C0028580|||C0024485|CSP;MEDLINEPLUS;PDQ|||

MRI|NMR - Nuclear magnetic resonance|C0024485|||C0024485|SNOMEDCT|||  
MRI|NMR Imaging|C0024485|||C0024485|MSH;NCI|||  
MRI|NMR Scan|||C0024485|SNOMEDCT|||  
MRI|NMR TOMOGR|||C0024485|MSH|||  
MRI|NMR Tomography|C0024485|||C0024485|MSH|||  
MRI|NMRI|C0024485;C1513846|||C0024485|NCI|||  
MRI|Nuclear Magnetic Resonance Imaging|C0024485|||C0024485|NCI|||  
MRI|Nuclear magnetic  
resonance|C0024485;C0028580;C1547989|||C0024485|MEDLINEPLUS;SNOMEDCT|||  
MRI|Nuclear magnetic resonance  
NOS|C0024485;C0028580;C1547989|||C0024485|SNOMEDCT|||  
MRI|Nuclear magnetic resonance NOS (procedure)|||C0024485|SNOMEDCT|||  
MRI|Research Institute|C0035172|||1|0.0005|  
MRI|TOMOGR MR|||C0024485|MSH|||  
MRI|TOMOGR NMR|||C0024485|MSH|||  
MRI|Tomography, MR|C0024485|||C0024485|MSH|||  
MRI|Tomography, NMR|C0024485|||C0024485|MSH|||  
MRI|ZEUGMATOGR|||C0024485|MSH|||  
MRI|Zeugmatography|C0024485|||C0024485|MSH|||  
MRI|imaging magnetic nuclear resonance|||C0024485|CHV|||  
MRI|machine-readable identifier|||1|  
MRI|magnetic resonance|C0028580;C0917874;C1551403|||1|0.004|  
MRI|magnetic resonance imagery|||1|0.0006|  
MRI|magnetic resonance images|||1|0.0275|  
MRI|magnetic resonance  
imaging|C0024485;C1552358|1|1.000|C0024485;C1552358|AOD;CCS;CHV;CSP;HL7V3.0;LCH;  
MEDLINEPLUS;MSH;MTH;NCI;PDQ;SNOMEDCT|1|0.9656|1  
MRI|magnetic resonance imaging (MRI)|C0024485;C1552358|||C0024485|CHV|||  
MRI|magnetic resonance tomography|||1|0.0013|  
MRI|medical records information|||1|  
MRI|moderate renal insufficiency|||1|  
MRI|nmr imaging|C0024485|||C0024485|CHV|||  
MRI|nuclear magnetic resonance|C0024485;C0028580;C1547989|||C0024485|PDQ|||  
MRI|nuclear magnetic resonance imaging|C0024485|||C0024485|AOD;NCI|||  
MR|ALDOSTERONE RECEPTOR|C0051133;C0066563|||C1417835|OMIM|||  
MR|Aldosterone Receptor|C0051133;C0066563|||C0066563|NCI|||  
MR|HISTIOCYTOMA, GIANT CELL|C0035290;C0311284|||C0311284|DXP|||  
MR|LIPOID DERMATOARTHRITIS|C0311284|||C0311284|DXP|||  
MR|Lipoid dermatoarthritis|C0311284|||C0311284|MTH;MTHICD9;SNOMEDCT|||  
MR|Lipoid dermatoarthritis (disorder)|||C0311284|SNOMEDCT|||  
MR|MAURITANIA|C0024943|||C0024943|NCI|||  
MR|MCR|C0066563;C1417835;C1705928|||C0066563;C1417835|NCI;OMIM|||  
MR|MINERALOCORTICOID RECEPT|||C0066563|MSH|||  
MR|MINERALOCORTICOID RECEPTOR|C0066563;C1417835|||C1417835|OMIM|||  
MR|MLR|C0066563;C1417835;C1705928|||C0066563;C1417835|NCI;OMIM|||  
MR|MR|C2347167|||C0024943;C0066563;C0311284;C1417835;C1996908|DXP;HUGO;LNC;NCI;O  
MIM|||  
MR|MR (in LOINC)|||C1996908|MTH|||  
MR|MRH|C0311284|||C0311284|DXP|||  
MR|MRT|C0024943;C2949870|||C0024943|NCI|||  
MR|Maddox rod|||1|  
MR|Maillard reaction|C0024495|||1|0.0007|  
MR|Maudsley Reactive|||1|0.0016|  
MR|Mauritania|C0024943|||C0024943|AOD;LCH;MSH;MTH;NCI;SNOMEDCT|||  
MR|Mauritania (geographic location)|||C0024943|SNOMEDCT|||  
MR|Menstrual regulation|C0025335|||1|0.0014|  
MR|Mental Rotation|||1|0.0008|

MR|Mineralocorticoid Receptor|C0066563;C1417835|||C0066563|MSH;MTH;NCI;NDFRT|||  
MR|Mineralocorticoid Receptors|C0066563|||C0066563|MSH;NDFRT|||  
MR|Mineralocorticoids Receptors|C0066563|||C0066563|MSH|||  
MR|Moro reflex|C0234173|||1  
MR|Multicentric Reticulohistiocytosis|C0311284|||C0311284|NCI|||  
MR|Multicentric reticulohistiocytosis|C0311284|||C0311284|SNOMEDCT|1|0.0015|  
MR|Multicentric reticulohistiocytosis (disorder)|||C0311284|SNOMEDCT|||  
MR|NR3C2|||C0066563;C1417835|HUGO;NCI;OMIM|||  
MR|NR3C2 Gene|C1417835|||C1417835|NCI|||  
MR|NR3C2 gene|C1417835|||C1417835|HUGO;MTH|||  
MR|NUCLEAR RECEPTOR SUBFAMILY 3, GROUP C, MEMBER 2|C1417835|||C1417835|OMIM|||  
MR|Nicolau-Balus syndrome|C0311284|||C0311284|SNOMEDCT|||  
MR|Nuclear Receptor Subfamily 3 Group C Member 2|C0066563|||C0066563|NCI|||  
MR|Nuclear Receptor Subfamily 3, Group C, Member 2  
Gene|C1417835|||C1417835|NCI|||  
MR|RECEPT MINERALOCORTICOID|||C0066563|MSH|||  
MR|RECEPT MINERALOCORTICIDS|||C0066563|MSH|||  
MR|RETICULOHISTIOCYTOMA, MULTICENTRIC|C0311284|||C0311284|DXP|||  
MR|Receptor, Mineralocorticoid|C0066563;C1417835|||C0066563|MSH|||  
MR|Receptors, Mineralocorticoid|C0066563|||C0066563|MSH;NCI;NDFRT|||  
MR|Receptors, Mineralocorticoid [Chemical/Ingredient]|||C0066563|NDFRT|||  
MR|Receptors, Mineralocorticoids|C0066563|||C0066563|MSH;NDFRT|||  
MR|lipoid dermatoarthritis|C0311284|||C0311284|CHV|||  
MR|macrophage mannose receptor|C1417249|||1|0.0008|  
MR|magnetic  
resonance|C0028580;C0917874;C1551403|1|0.628|C0028580;C0917874;C1551403|CHV;HL7V  
3.0;MSH;MTH;NCI|1|0.7672|1  
MR|magnetoresistance|||1|0.0008|  
MR|malar rash|C0277942|||1  
MR|mandelate racemase|C0065635|||1|0.0009|  
MR|mandible ramus|||1  
MR|mandibular reflex|||1  
MR|manifest refraction|C1301318|||1  
MR|mannose-resistant|||1|0.0023|1  
MR|mauritania|C0024943|||C0024943|CHV|||  
MR|maximal right|||1  
MR|may repeat|||1  
MR|measles-rubella|||1  
MR|medial rectus|C0224130;C0582820|||1|0.0022|1  
MR|medial rotation|C0231459|||1  
MR|median raphe|||1|0.0021|1  
MR|median raphe nucleus|C0228432|||1|0.0024|  
MR|medical record|C0025102|1|0.002|C0025102|CHV;CSP;MSH;NCI;SNOMEDCT|||1  
MR|medical rehabilitation|C0034991|||1  
MR|medication responder|||1  
MR|medium range|||1  
MR|megaröntgen|||1  
MR|menstrual regulation|C0025335|||1  
MR|mental  
retardation|C0025362|1|0.006|C0025362|AOD;CCS;CHV;COSTAR;CSP;CST;DXP;ICPC;LCH;LN  
C;MEDLINEPLUS;MSH;MTH;NCI;NDFRT;OMIM;QMR;SNOMEDCT|1|0.0234|1  
MR|mentally retarded|C0079822|||C0079822|AOD;CHV;MSH;MTH|1|0.0032|1  
MR|mesencephalic raphe|||1  
MR|metabolic rate|C0870882|||C0870882|CHV|1|0.0079|1  
MR|metabolic ratio|||1|0.0072|  
MR|methemoglobin  
reductase|C0025636;C1412802|||C0025636;C1412802|MSH;MTH;OMIM|||1

MR|methicillin-resistant|C1955827|||C1955827|MSH|1|0.002|  
MR|methyl red|C0066279|||C0066279|MSH;MTH;SNOMEDCT|||1  
MR|milk replacer|||1|0.0009|  
MR|milk ring|||1  
MR|milliroentgen|||1  
MR|mineralocorticoid  
receptor|C0066563;C1417835|||C0066563;C1417835|CSP;MSH;MTH;NCI;NDFRT;OMIM|1|0.03  
39|1  
MR|minor responses|||1|0.001|  
MR|mitochondria-rich|||1|0.0039|  
MR|mitotic rate|||1|0.0017|  
MR|mitral reflux|||1  
MR|mitral  
regurgitation|C0026266|1|0.352|C0026266|CHV;COSTAR;CSP;DXP;MSH;MTH;NCI;NDFRT;OMI  
M;SNOMEDCT|1|0.0578|1  
MR|mixed respiratory|||1  
MR|moderate resistance|||1  
MR|modified release|C1709058|||1|0.0022|  
MR|modulation rate|||1  
MR|mol wt|||1|0.0039|  
MR|molecular remission|||1|0.0008|  
MR|molecular replacement|||1|0.0007|  
MR|molecular size|C0596969|||1|0.0005|  
MR|molecular weight|C0026385|||1|0.0325|  
MR|morbid risk|||1|0.0004|  
MR|morphinone reductase|C0255930|||1|0.0005|  
MR|mortality  
rate|C0026565;C0205848|||C0026565;C0205848|AOD;CHV;NCI;SNOMEDCT|1|0.0022|1  
MR|mortality ratio|||1|0.0017|1  
MR|mother-reared|||1|0.001|  
MR|motivation research|||1  
MR|multicentric reticulohistiocytosis|C0311284|||C0311284|NCI;SNOMEDCT|||1  
MR|multiplication rate|||1  
MR|multiplicity reactivation|||1  
MR|multiresistant|||1|0.0008|  
MR|muscle receptor|||1  
MR|muscle relaxant|C0358430;C2911818|||C0358430;C2911818|CHV;CSP;NCI;NDFRT|||1  
MR|myocardial revascularization|C0027056|||C0027056|AOD;CHV;LCH;MSH;SNOMEDCT|||1  
MR|myotactic reflex|||1  
MR|nuclear receptor subfamily 3, group C, member 2|C1417835|||C1417835|HUGO|||  
MR|relative molecular mass|||1|0.0238|1  
MR|resistance|C0237834;C1514892|||1|0.0014|  
MRSA|Carrier or suspected carrier of Methicillin resistant Staphylococcus  
aureus|||C2350012|ICD9CM|||  
MRSA|Encounter due to methicillin resistant Staphylococcus  
aureus|C2350012|||C2350012|MTH|||  
MRSA|Hx Methicln resist Staph|||C2350012|ICD9CM|||  
MRSA|Infection due to Methicillin resistant Staphylococcus  
aureus|C0343401|||C0343401|SNOMEDCT|||  
MRSA|METHICILLIN RESISTANT STAPH AUREUS|||C1265292|MSH|||  
MRSA|MRSA|C0343401;C1265292;C2350012|||C0343401;C1265292;C2350012|CHV;CSP;MEDLIN  
EPLUS;MSH;MTHICD9;SNOMEDCT|||  
MRSA|MRSA - Methicillin resistant Staphylococcus aureus  
infection|C0343401|||C0343401|MTH|||  
MRSA|MRSA - Methicillin-resistant staphylococcus aureus|||C0343401|SNOMEDCT|||  
MRSA|MRSA infection|C0343401|||C0343401|SNOMEDCT|||  
MRSA|Meth resis Staph carrier|||C2350012|ICD9CM|||

MRSA|Methicillin Resistant Staphylococcus  
Aureus|C0343401;C1265292|||C1265292|MEDLINEPLUS|||  
MRSA|Methicillin resistant Staphylococcus  
aureus|C0343401;C1265292|||C1265292|SNOMEDCT|||  
MRSA|Methicillin resistant Staphylococcus aureus  
(organism)|C1265292|||C1265292|MTH;SNOMEDCT|||  
MRSA|Methicillin resistant Staphylococcus aureus  
infection|C0343401|||C0343401|SNOMEDCT|||  
MRSA|Methicillin resistant Staphylococcus aureus infection  
(disorder)|||C0343401|SNOMEDCT|||  
MRSA|Methicillin resistant staphylococcus  
aureus|C0343401;C1265292|||C0343401|SNOMEDCT|||  
MRSA|Methicillin-Resistant Staphylococcus  
aureus|C0343401;C1265292|||C1265292|MSH|||  
MRSA|Methicillin-resistant S aureus|||||1|0.0072|  
MRSA|Methicillin-resistant Staphylococcus  
aureus|C0343401;C1265292|||C1265292|MEDLINEPLUS|1|0.9512|  
MRSA|Methicillin-resistant Staphylococcus aureus strains|||||1|0.003|  
MRSA|Methicillin-resistant staphylococcus  
aureus|C0343401;C1265292|||C0343401|MTHICD9;SNOMEDCT|||  
MRSA|Methicillin-resistant staphylococcus aureus  
infection|C0343401|||C0343401|SNOMEDCT|||  
MRSA|Methicillin-resistant staphylococcus aureus infection  
(disorder)|||C0343401|SNOMEDCT|||  
MRSA|Personal history of Methicillin resistant Staphylococcus  
aureus|C2350012|||C2350012|ICD9CM|||  
MRSA|Staphylococcus aureus.methicillin resistant|C1265292|||C1265292|LNC|||  
MRSA|methicillin resistant Staphylococcus  
aureus|C0343401;C1265292|||C1265292|CSP|||  
MRSA|methicillin resistant staphylococcus aureus  
(MRSA)|C0343401;C1265292|||C1265292|CHV|||  
MRSA|methicillin-resistant|C1955827|||||1|0.0271|  
MRSA|methicillin-resistant Staphylococcus aureus|C0343401;C1265292|1|1.000|||||1  
MRSA|methicillin-resistant staphylococcus aureus (MRSA)  
infection|C0343401|||C0343401|CHV|||  
MRSA|methicillin-resistant strains|||||1|0.0051|  
MRSA|mrsa infection|C0343401|||C0343401|CHV|||  
MRSA|resistant to methicillin|||||1|0.0064|  
MS|(drug) MS||1|0.002|||||  
MS|5-@METHYLTETRAHYDROFOLATE-HOMOCYSTEINE S-  
METHYLTRANSFERASE|C0039676;C1417453|||C1417453|OMIM|||  
MS|5-methyltetrahydrofolate-homocysteine  
methyltransferase|C0039676;C1417453|||C1417453|HUGO|||  
MS|ANAL MASS SPECTRUM|||C0037813|MSH|||  
MS|Analyses, Mass Spectrum|C0037813|||C0037813|MSH|||  
MS|Analysis, Mass Spectrum|C0037813|||C0037813|MSH|||  
MS|Chinese Meishan|||||1|0.0008|  
MS|DISSEMINATED SCLEROSIS|C0026769;C1868685|||C1868685|OMIM|||  
MS|DS - Disseminated sclerosis|C0026769|||C0026769|SNOMEDCT|||  
MS|Disseminated Sclerosis|C0026769;C1868685|||C0026769|MSH|||  
MS|Disseminated sclerosis|C0026769;C1868685|||C0026769|SNOMEDCT|||  
MS|Generalised multiple sclerosis|C0026769|||C0026769|SNOMEDCT|||  
MS|Generalized multiple sclerosis|C0026769|||C0026769|SNOMEDCT|||  
MS|Generalized multiple sclerosis (disorder)|||C0026769|SNOMEDCT|||  
MS|M.S.|C0369637;C0441923;C1553034|||C1513009|NCI|||  
MS|MASS SPECTROMETER, CLINICAL USE|C0183396|||C0183396|SPN|||  
MS|MASS SPECTROMETRY|C0037813|||C0037813|NCI|||

MS|MASS SPECTRUM ANAL|||C0037813|MSH|||  
MS|METHIONINE SYNTHASE|C0039676;C1417453||C1417453|OMIM|||  
MS|MH|||C0026514|NCI|||  
MS|MITRAL STENOSIS|C0026269;C0264766||C0026269|COSTAR;DXP;NCI;QMR|||  
MS|MITRAL VALVE STENOSIS|C0026269;C0264766||C0026269|DXP|||  
MS|MITRAL VALVE, STENOSIS|C0026269||C0026269|DXP|||  
MS|MONTSERRAT|C0026514||C0026514|NCI|||  
MS|MS|C2349943||C0025867;C0026221;C0026269;C0026514;C0026769;C0037813;C0183396;  
C0439223;C1417325;C1417453;C1513009;C1868685;C1881819|CHV;CSP;DXP;HUGO;MEDLINEPL  
US;MSH;NCI;OMIM|||  
MS|MS (Multiple Sclerosis)|C0026769||C0026769|MSH;NDFRT|||  
MS|MS - Mitral stenosis|C0026269||C0026269|SNOMEDCT|||  
MS|MS - Multiple sclerosis|C0026769||C0026769|SNOMEDCT|||  
MS|MS gene|C1417325||C1417325|HUGO;MTH|||  
MS|MS multiple sclerosis|C0026769||C0026769|CHV|||  
MS|MS1|C1417325;C1868685||C1417325;C1868685|HUGO;OMIM|||  
MS|MSR|C0026514;C1417458;C1826541||C0026514|NCI|||  
MS|MTR|C1417453||C1417453|HUGO;OMIM|||  
MS|MTR gene|C1417453||C1417453|HUGO;MTH|||  
MS|MULTIPLE SCLEROSIS|C0026769;C1417325||C0026769|COSTAR;CST;QMR|||  
MS|MULTIPLE SCLEROSIS, SUSCEPTIBILITY TO|C1868685||C1868685|MTH;OMIM|||  
MS|MULTIPLE SCLEROSIS, SUSCEPTIBILITY TO, 1|||C1868685|OMIM|||  
MS|Manchester Scale|||1|0.0005|  
MS|Mass Spec|C0037813||C0037813|NCI|||  
MS|Mass Spectrometer|C0183396||C0183396|NCI|||  
MS|Mass Spectrometers (device)|C0183396||C0183396|MTH|||  
MS|Mass Spectrometry|C0037813||C0037813|MSH;MTH;NCI|||  
MS|Mass Spectroscopy|C0037813||C0037813|MSH|||  
MS|Mass Spectrum|C0037813||C0037813|NCI|||  
MS|Mass Spectrum Analyses|C0037813||C0037813|MSH|||  
MS|Mass Spectrum Analysis|C0037813||C0037813|MSH|||  
MS|Mass spectrometry|C0037813||C0037813|LCH;SNOMEDCT|||  
MS|Mass spectrometry (procedure)|||C0037813|SNOMEDCT|||  
MS|Mass spectrometry measurement|C0037813||C0037813|SNOMEDCT|||  
MS|Mass spectrometry measurement (procedure)|||C0037813|SNOMEDCT|||  
MS|Mass spectrometry measurement, NOS|C0037813||C0037813|SNOMEDCT|||  
MS|Mass spectroscopy measurement|C0037813||C0037813|SNOMEDCT|||  
MS|Mass spectroscopy measurement, NOS|C0037813||C0037813|SNOMEDCT|||  
MS|Master of Science|C1513009||C1513009|HL7V2.5;MTH;NCI|||  
MS|Maternal serum|||1|0.0042|  
MS|Meal size|||1|0.0006|  
MS|Mean sensitivity|||1|0.0027|  
MS|Meckel syndrome|C0265215|||1|  
MS|Mental Stress|C0038443|||1|0.0013|  
MS|Metric System|C0025867||C0025867|MSH;MTH;NCI|||  
MS|Metric Systems|C0025867||C0025867|MSH|||  
MS|Metric system|C0025867||C0025867|LCH|||  
MS|Microbiology Susceptibility|C1881819||C1881819|NCI|||  
MS|Microbiology Susceptibility Domain|C1881819||C1881819|MTH;NCI|||  
MS|Millisecond|C0439223||C0439223|NCI|||  
MS|Mississippi|C0026221||C0026221|AOD;LCH;MSH;NCI;SNOMEDCT|||  
MS|Mississippi (geographic location)|C0026221||C0026221|MTH;SNOMEDCT|||  
MS|Mitral Stenoses|C0026269||C0026269|MSH|||  
MS|Mitral Stenosis|C0026269;C0264766||C0026269|MSH;NCI;NDFRT|||  
MS|Mitral Valve Stenoses|C0026269||C0026269|MSH|||  
MS|Mitral Valve Stenosis|C0026269;C0264766||C0026269|MSH;MTH;NDFRT|||  
MS|Mitral Valve Stenosis [Disease/Finding]|||C0026269|NDFRT|||

MS|Mitral stenosis|C0026269;C0264766|||C0026269|OMIM;SNOMEDCT|||  
MS|Mitral valve stenosis|C0026269;C0264766|||C0026269|SNOMEDCT|||  
MS|Mitral valve stenosis (disorder)|||C0026269|SNOMEDCT|||  
MS|Mitral valve stenosis, NOS|C0026269;C0264766|||C0026269|SNOMEDCT|||  
MS|Montserrat|C0026514|||C0026514|AOD;MSH;MTH;NCI|||  
MS|Montserrat island|C0026514|||C0026514|SNOMEDCT|||  
MS|Montserrat island (geographic location)|||C0026514|SNOMEDCT|||  
MS|Ms|C2349943|||C1552156;C2349943|HL7V3.0;NCI|||  
MS|Ms.|C2349943|||C2349943|NCI|||  
MS|Ms. - Title|C2349943;C1519530;C1704446;C1705823;C1705824|||C2349943|MTH|||  
MS|Msec|C0439223|||C0439223|NCI|||  
MS|Multiple  
Sclerosis|C0026769;C1417325|||C0026769|MEDLINEPLUS;MSH;MTH;NCI;NDFRT|||  
MS|Multiple Sclerosis [Disease/Finding]|||C0026769|NDFRT|||  
MS|Multiple  
sclerosis|C0026769;C1417325|||C0026769|CCS;ICD9CM;ICPC;LCH;LNC;SNOMEDCT|||  
MS|Multiple sclerosis (disorder)|||C0026769|SNOMEDCT|||  
MS|Multiple sclerosis NOS|C0026769;C1417325|||C0026769|SNOMEDCT|||  
MS|Multiple sclerosis NOS (disorder)|||C0026769|SNOMEDCT|||  
MS|Multiple sclerosis, NOS|C0026769;C1417325|||C0026769|SNOMEDCT|||  
MS|Murashige and Skoog|||1|0.0055|  
MS|Murashige-Skoog|||1|0.0008|  
MS|Mycoplasma synoviae|C0317810|||1|0.0045|  
MS|Photometry/Spectrum Analysis, Mass|||C0037813|NCI|||  
MS|SCLEROSIS MULTIPLE|||C0026769|CST|||  
MS|SCLEROSIS, DISSEMINATED|C0026769;C1868685|||C0026769|DXP|||  
MS|SCLEROSIS, INSULAR|C0026769|||C0026769|DXP|||  
MS|SCLEROSIS, MULTIPLE|C0026769;C1417325|||C0026769|DXP|||  
MS|SPECTRUM ANAL MASS|||C0037813|MSH|||  
MS|STENOSIS, MITRAL|C0026269;C0264766|||C0026269|NCI|||  
MS|Sclerosis, Disseminated|C0026769;C1868685|||C0026769|MSH;NDFRT|||  
MS|Sclerosis, Multiple|C0026769;C1417325|||C0026769|MSH|||  
MS|Spectrometry, Mass|C0037813|||C0037813|MSH|||  
MS|Spectroscopy, Mass|C0037813|||C0037813|MSH|||  
MS|Spectrum Analyses, Mass|C0037813|||C0037813|MSH|||  
MS|Spectrum Analysis, Mass|C0037813|||C0037813|MSH|||  
MS|Stenoses, Mitral|C0026269|||C0026269|MSH|||  
MS|Stenoses, Mitral Valve|C0026269|||C0026269|MSH|||  
MS|Stenosis, Mitral|C0026269;C0264766|||C0026269|MSH|||  
MS|Stenosis, Mitral Valve|C0026269;C0264766|||C0026269|MSH|||  
MS|Supernumerary mandibular left primary canine|C1552156|||C1552156|MTH|||  
MS|System, Metric|C0025867|||C0025867|MSH|||  
MS|Systems, Metric|C0025867|||C0025867|MSH|||  
MS|TETRAHYDROPTEROYLGLUTAMATE  
METHYLTRANSFERASE|C0039676;C1417453|||C1417453|OMIM|||  
MS|Valve Stenoses, Mitral|C0026269|||C0026269|MSH|||  
MS|Valve Stenosis, Mitral|C0026269;C0264766|||C0026269|MSH|||  
MS|cblG|C1417453|||C1417453|HUGO|||  
MS|disseminated sclerosis|C0026769;C1868685|||C0026769|CHV;CSP|||  
MS|duration|C0449238;C2926735|||1|0.0007|  
MS|insular sclerosis|C0026769|||C0026769|CHV;CSP|||  
MS|interval|C1272706;C1552654;C1552713|||1|0.0008|  
MS|magnetic source|||1|0.0008|  
MS|magnetic stimulation|||1|0.0021|  
MS|main scale|||1|  
MS|mainstream|C0024500|||C0024500|CHV|1|0.0025|  
MS|mainstream smoke|||1|0.0015|

MS|maladjustment score|||||||1  
MS|malate synthase|C0024545|||C0024545|CSP;MSH;MTH;NDFRT;SNOMEDCT|||  
MS|malignant Schwannoma|C0751690|||||1|0.0006|  
MS|malignant schwannoma|C0751690|||C0751690|CHV;MSH;NCI;OMIM;SNOMEDCT|||  
MS|mannose-sensitive|||||1|0.0032|1  
MS|manuscript|C0600659|||C0600659|AOD;CHV;NCI|||1  
MS|marbling score|||||1|0.0007|  
MS|marijuana smokers|||||1|0.0005|  
MS|mass screening|C0024870|||||1|0.0013|  
MS|mass spectral|||||1|0.0007|  
MS|mass spectrography|C0037813|||C0037813|AOD|||  
MS|mass spectrometer|C0183396|||C0183396|CHV;NCI|1|0.0042|  
MS|mass spectrometric|||||1|0.0116|  
MS|mass  
spectrometry|C0037813|||C0037813|AOD;CHV;CSP;LCH;MSH;MTH;NCI;PDQ;SNOMEDCT|1|0.09  
67|1  
MS|mass spectrophotometer|||||||1  
MS|mass spectroscopy|C0037813|||C0037813|AOD;CHV;CSP;MSH|||  
MS|mass spectrum analysis|C0037813|||C0037813|CSP|||  
MS|master of science|C1513009|1|0.006|||||  
MS|maternal separation|||||1|0.0017|  
MS|maxillary sinus|C0024957;C1278899|||||||1  
MS|mean score|||||||1  
MS|mechanical stimulation|C1285354|||||||1  
MS|mechanosensitive|||||1|0.0038|  
MS|medial septal|||||1|0.0032|  
MS|medial septal nucleus|C0175233|||||1|0.0016|  
MS|medial septum|||||1|0.008|  
MS|median sternotomy|C1282959|||||1|0.0008|1  
MS|median survival|||||1|0.0038|  
MS|medical services|C0587569|||||||1  
MS|medical student|C0038495|1|0.002|||||  
MS|medical supply|C0740043|||||||1  
MS|medical survey|||||||1  
MS|medical-surgical|C1552239;C1555987|||||||1  
MS|medium|C0009458;C0439536;C1705217|||||1|0.001|  
MS|melanonychia striata|C1142305|||||||1  
MS|menopausal syndrome|C0025319|||||||1  
MS|mental status|C0278060|||||||1  
MS|metabolic syndrome|C0524620;C0948265|||||1|0.0134|1  
MS|methionine  
synthase|C0039676;C1417453|||C0039676;C1417453|CHV;CSP;MSH;NDFRT;OMIM;SNOMEDCT|1  
|0.005|  
MS|methionine synthetase|C0039676|||C0039676|CHV;MSH;NDFRT|1|0.0009|  
MS|methyl salicylate|C0066282|||||1|0.0008|  
MS|metric system|C0025867|||C0025867|CHV|||  
MS|microsatellite|C1519302|||C1519302|CHV;MSH;NCI|1|0.0038|  
MS|microscope slide|C0026017|||||||1  
MS|microsphere|C0026032|||C0026032|CHV;CSP;MSH;NCI|||  
MS|microspheres|C0026032|||C0026032|CHV;LCH;MSH|1|0.0092|  
MS|middle suprasylvian|||||1|0.0008|  
MS|mild steel|||||1|0.0012|  
MS|milkshake|||||||1  
MS|millisecond|C0439223|||C0439223|CHV;MTH;NCI;SNOMEDCT|||1  
MS|millisecond (ms)|C0439223|||C0439223|CHV|||  
MS|milliseconds|||||1|0.0029|  
MS|mineralizing surface|||||1|0.0007|

MS|minimal support|||||||1  
MS|mississippi|C0026221|||C0026221|CHV|||  
MS|mitral sound|||||||1  
MS|mitral  
stenosis|C0026269;C0264766|1|0.002|C0026269;C0264766|CHV;COSTAR;DXP;ICD9CM;MSH;N  
CI;NDFRT;OMIM;QMR;SNOMEDCT|1|0.0243|1  
MS|mitral valve stenosis|C0026269;C0264766|||C0026269|CHV;CSP|||  
MS|mobile surgical|||||||1  
MS|modal sensitivity|||||||1  
MS|moderately susceptible|C0442815|||||||1  
MS|molar solution|||||||1  
MS|molar substitution|||||1|0.0005|  
MS|mongolian spot|C0265985|||||||1  
MS|morning stiffness|C0457086|||||||1  
MS|morphine|C0026549;C2698261|||||1|0.0014|  
MS|morphine  
sulfate|C0066814|1|0.558|C0066814|CHV;MSH;MTH;MTHSPL;NCI;NDFRT;PDQ;RXNORM;SNOMED  
CT;USPMG;VANDF|1|0.0071|1  
MS|motile sperm|||||||1  
MS|motion  
sickness|C0026603|||C0026603|AOD;CHV;COSTAR;DXP;ICD9CM;LCH;MEDLINEPLUS;MSH;MTH;N  
CI;NDFRT;OMIM;SNOMEDCT|1|0.0028|  
MS|ms|C2349943|||C0439223|NCI;SNOMEDCT|||  
MS|ms (qualifier value)|||C0439223|SNOMEDCT|||  
MS|msec|C0439223|||C0439223|CHV;NCI|||  
MS|mucosal-to-serosal|||||1|0.0008|  
MS|mucosubstance|||||||1  
MS|multilaminated structure|||||||1  
MS|multiple  
sclerosis|C0026769;C1417325|1|0.414|C0026769;C1417325|AOD;CCS;CHV;COSTAR;CSP;CST  
;HUGO;ICD9CM;ICPC;LCH;LNC;MEDLINEPLUS;MSH;MTH;NCI;NDFRT;QMR;SNOMEDCT|1|0.737|1  
MS|multiple sclerosis (MS)|C0026769;C1417325|||C0026769|CHV|||  
MS|multiple sclerosis MS|C0026769|||C0026769|CHV|||  
MS|multiple sclerosys|||C0026769|CHV|||  
MS|multiple sderosis|||||1|0.0008|  
MS|multiple-scattering|||||1|0.0008|  
MS|multiples sclerosi|||C0026769|CHV|||  
MS|multiples sclerosis|C0026769|||C0026769|CHV|||  
MS|murmurs|C0018808|||||||1  
MS|muscle shortening|C0185423|||||||1  
MS|muscle spasm|C0037763|||||||1  
MS|muscle strength|C0517349|||||||1  
MS|musculoskeletal|C0497254;C2707260|1|0.004|||||1  
MS|mutans streptococci|||||1|0.0115|  
MS|mutator strain|||||1|0.0006|  
MS|myasthenic syndrome|C0022972;C0549225|||||||1  
MS|myeloid sarcoma|C0152276|||||||1  
MS|strength|C0237897;C0808080;C1705922|||||1|0.0008|  
MSSA|Encounter due to Methicillin susceptible Staphylococcus  
aureus|C2355591|||C2355591|MTH|||  
MSSA|MSSA|C1635274;C2355591|||C1635274;C2355591|MTHICD9;SNOMEDCT|||  
MSSA|Meth susc Staph carrier|||C2355591|ICD9CM|||  
MSSA|Methicillin susceptible Staphylococcus  
aureus|C1635274;C2355591|||C1635274;C2355591|ICD9CM;SNOMEDCT|||  
MSSA|Methicillin susceptible Staphylococcus aureus  
(organism)|C1635274|||C1635274|MTH;SNOMEDCT|||  
MSSA|Methicillin-susceptible S aureus|||||1|0.0133|

MSSA|methicillin-sensitive|||||1|0.0733|  
MSSA|methicillin-sensitive S aureus|||||1|0.04|  
MSSA|methicillin-sensitive Staphylococcus aureus|||||1|0.38|  
MSSA|methicillin-susceptible|||||1|0.16|  
MSSA|methicillin-susceptible Staphylococcus aureus|C1635274;C2355591|1|0.164||1|0.3333|1  
MSSA|modified selective severity assessment||1|0.836|||||  
MTP|ABL|||C1826328|HUGO|||  
MTP|D-Glucose, 4-O-alpha-D-glucopyranosyl-, tetrahexadecanoate|C0065610|||C0065610|MSH|||  
MTP|MICROSOMAL TRIGLYCERIDE TRANSFER PROTEIN, 88-KD|C1826328|||C1826328|OMIM|||  
MTP|MTP|C0065610;C1826328|||C0065610;C1826328|OMIM;SNOMEDCT|||  
MTP|MTP, LARGE SUBUNIT|C1826328|||C1826328|OMIM|||  
MTP|MTTP|C0069187;C1538010;C1826328|||C1826328|HUGO;OMIM|||  
MTP|MTTP gene|C1826328|||C1826328|HUGO;MTH|||  
MTP|Maltose tetrapalmitate|C0065610|||C0065610|SNOMEDCT|||  
MTP|Maltose tetrapalmitate (substance)|||C0065610|SNOMEDCT|||  
MTP|Treatment Project|||||1|0.0285|  
MTP|first metatarsophalangeal|||||1|0.0823|  
MTP|maltose tetrapalmitate|C0065610|||C0065610|MSH;MTH;SNOMEDCT|1|0.0443|  
MTP|maltose tetrapalmitate (MTP)|C0065610|||C0065610|CHV|||  
MTP|master treatment plan|||||1|  
MTP|maximal tolerated pressure|||||1|  
MTP|medial tibial plateau|||||1|  
MTP|median time to progression|||||1|0.0222|  
MTP|median time to tumor progression|||||1|0.0222|  
MTP|medical termination of pregnancy|C3146282|||||1|0.0443|1  
MTP|mesencephalic tegmental paralysis|C0455715|||||1|  
MTP|metatarsal periostitis|||||1|  
MTP|metatarsophalangeal||1|1.000|||||1|  
MTP|microsomal triglyceride transfer protein|C0207079;C1826328|||C0207079;C1826328|HUGO;MSH;MTH|1|0.6203|1  
MTP|microtubule protein|||||1|  
MTP|microtubule proteins|C0026042|||||1|0.0158|  
MTP|mitochondrial permeability transition pore|C0908146;C2000322|||C0908146|MSH;MTH|1|0.057|  
MTP|mitochondrial transmembrane potential|||||1|0.0633|  
MTP|multidisciplinary treatment plan|||||1|  
MUGA|MUGA|C0521317|||C0521317|NCI|||  
MUGA|MUGA - Multiple-gated acquisition|C0521317|||C0521317|SNOMEDCT|||  
MUGA|MUGA - Multiple-gated acquisiton|||C0521317|SNOMEDCT|||  
MUGA|MUGA Scan|C0521317|||C0521317|NCI|||  
MUGA|MUGA scan|C0521317|||C0521317|SNOMEDCT|||  
MUGA|Multi-Gated Acquisition Scan|C0521317|||C0521317|NCI|||  
MUGA|Multiple gated acquisition|||||1|0.4074|  
MUGA|Multiple gated acquisition scanning|C0521317|||C0521317|SNOMEDCT|||  
MUGA|Multiple gated acquisition scanning (procedure)|||C0521317|SNOMEDCT|||  
MUGA|Multiple gated acquisition scanning, NOS|C0521317|||C0521317|SNOMEDCT|||  
MUGA|Radionuclide Ventriculogram Scan|C0521317|||C0521317|NCI|||  
MUGA|acquisition gated multiple scanning|||C0521317|CHV|||  
MUGA|muga scan|C0521317|||C0521317|CHV|||  
MUGA|muga scans|||C0521317|CHV|||  
MUGA|multigated angiogram|||||1|  
MUGA|multiple gated acquisition||1|1.000|||||1|  
MUGA|multiple gated acquisition scan|C0521317|||C0521317|CHV|||  
MUGA|radionuclide angiography|C0034604|||||1|0.2222|  
MUGA|radionuclide ventriculography|C0034610|||||1|0.3704|

MUGA|scan muga|C0521317|||C0521317|CHV|||  
MVA|AVM protocol|C0052712|||C0052712|MSH|||  
MVA|DOX/MITO/VBL|||C0052712|NCI;PDQ|||  
MVA|Doxorubicin/Mitomycin/Vinblastine|||C0052712|NCI|||  
MVA|Instability mitotic non disjunction syndrome|C1850343|||C1850343|MSH|||  
MVA|MOSAIC VARIEGATED ANEUPLOIDY SYNDROME|C1850343|||C1850343|MTH;OMIM|||  
MVA|MOTOR VEHICLE ACCIDENT|C0000932;C1553508;C2939181|||C2939181|COSTAR|||  
MVA|MOTOR VEHICLE TRAFFIC ACCIDENTS|C2939181|||C2939181|ICD9CM|||  
MVA|MVA|C0052712;C1850343;C2939181|||C0052712;C1850343;C2939181|NCI;OMIM;PDQ;SNO  
MEDCT|||  
MVA|MVA - Motor vehicle accident|C2939181|||C2939181|SNOMEDCT|||  
MVA|MVA SYNDROME|C1850343|||C1850343|OMIM|||  
MVA|MVTA - Motor vehicle traffic accident|C2939181|||C2939181|SNOMEDCT|||  
MVA|Modified vaccinia Ankara|||1|0.0589|  
MVA|Modified vaccinia virus Ankara|||1|0.187|  
MVA|Mosaic variegated aneuploidy syndrome|C1850343|||C1850343|MSH|||  
MVA|Motor vehicle accident|C0000932;C1553508;C2939181|||C2939181|MTH;SNOMEDCT|||  
MVA|Motor vehicle accident (event)|||C2939181|SNOMEDCT|||  
MVA|Motor vehicle collision NOS|C0000932|||C2939181|SNOMEDCT|||  
MVA|Motor vehicle collision NOS (event)|||C2939181|SNOMEDCT|||  
MVA|Motor vehicle collision NOS (finding)|||C2939181|SNOMEDCT|||  
MVA|Motor vehicle traffic accident|C2939181|||C2939181|SNOMEDCT|||  
MVA|Motor vehicle traffic accident (event)|||C2939181|SNOMEDCT|||  
MVA|Motor vehicle traffic accident (finding)|||C2939181|SNOMEDCT|||  
MVA|Motor vehicle traffic accident NOS|C2939181|||C2939181|SNOMEDCT|||  
MVA|Motor vehicle traffic accident NOS (event)|||C2939181|SNOMEDCT|||  
MVA|Motor vehicle traffic accident NOS (finding)|||C2939181|SNOMEDCT|||  
MVA|Multivariate analysis|C0026777|||1|0.0366|  
MVA|RTA - motor vehicle|||C2939181|SNOMEDCT|||  
MVA|car/truck accident|||C2939181|AOD|||  
MVA|doxorubicin/mitomycin/vinblastine|||C0052712|PDQ|||  
MVA|doxorubicin/mitomycin/vinblastine protocol|C0052712|||C0052712|MTH|||  
MVA|malignant ventricular arrhythmia|||1|  
MVA>manual vacuum aspiration|||1|0.0874|1|  
MVA|mechanical ventricular assistance|||1|  
MVA|mevalonate|C0677647|||C0677647|CHV;CSP;LNC;MSH;SNOMEDCT|1|0.0874|  
MVA|mevalonic acid|C0025879|||1|0.1037|1|  
MVA|microvascular angina|C0206064|||C0206064|CHV;MSH;NDFRT|||  
MVA|microvascular angiopathy|||1|  
MVA|microvillus atrophy|||1|  
MVA|mitral valve area|C0428818|||C0428818|SNOMEDCT|1|0.2581|1|  
MVA|modified vaccinia virus Ankara|||1|  
MVA|motor vehicle  
accident|C0000932;C1553508;C2939181|1|0.986|C0000932;C1553508;C2939181|CHV;COSTA  
R;HL7V3.0;MTH;SNOMEDCT|1|0.1809|1|  
MVA|multivariate analysis|C0026777|||C0026777|AOD;CHV;MSH|||  
MVI|malignant vascular injury|||1|  
MVI|mitral valve insufficiency|C0026266|||1|  
MVI|motor vehicle injury|C1318747|||1|  
MVI|multi vitamin|||1|0.000|||  
MVI|multiple vitamin injection|||1|  
MVI|multivalvular involvement|||1|  
MVI|multivitamin infusion|||1|  
N0|Lymph Node Stage N0|C0441959|||C0441959|NCI|||  
N0|N0|C0441959|||C0441959|NCI|||  
N0|N0 Cancer Stage Finding|C0441959|||C0441959|NCI|||  
N0|N0 Lymph Node Finding|C0441959|||C0441959|NCI|||

N0|N0 Lymph Node Stage|C0441959|||C0441959|NCI|||  
N0|N0 Node Finding|C0441959|||C0441959|NCI|||  
N0|N0 Node Stage|C0441959|||C0441959|NCI|||  
N0|N0 Regional Lymph Node Stage Finding|C0441959|||C0441959|NCI|||  
N0|N0 Regional Lymph Nodes Finding|||C0441959|NCI|||  
N0|N0 Stage|C0441959|||C0441959|NCI|||  
N0|N0 Stage Finding|C0441959|||C0441959|NCI|||  
N0|N0 TNM Finding|C0441959|||C0441959|NCI|||  
N0|N0 category|C0441959|||C0441959|SNOMEDCT|||  
N0|N0 category (finding)|||C0441959|SNOMEDCT|||  
N0|N0 stage|C0441959|||C0441959|SNOMEDCT|||  
N0|N0 stage (finding)|C0441959|||C0441959|SNOMEDCT|||  
N0|N0 stage (tumor staging)|||C0441959|SNOMEDCT|||  
N0|N0|C1298908;C1549444|||C0441959|SNOMEDCT|||  
N0|Node Stage N0|C0441959|||C0441959|NCI|||  
N0|Node stage N0|C0441959|||C0441959|MTH;SNOMEDCT|||  
N0|Node stage N0 (tumor staging)|||C0441959|SNOMEDCT|||  
N0|clinically negative|||1|0.1875|  
N0|clinically negative neck|||1|0.125|  
N0|lymph node involvement|C0806692|||1|0.1042|  
N0|no lymph nodes containing cancer cells||1|1.000|||1|  
N0|node-negative|C0279781;C0678034|||C0279781;C0678034|CHV;NCI|1|0.5833|  
NAD|.Beta.-NAD|C0027270|||C0027270|NCI|||  
NAD|3-Carbamoyl-1-.Beta.-D-Ribofuranosylpyridinium Hydroxide 5'-5'-Ester with Adenosine 5'-(Trihydrogen Pyrophosphate) Inner Salt|||C0027270|NCI|||  
NAD|3-Carbamoyl-1-.Beta.-D-Ribofuranosylpyridinium Hydroxide, 5'-Ester with Adenosine 5'-Pyrophosphate, Inner Salt|||C0027270|NCI|||  
NAD|Adenine Dinucleotide, Dihydronicotinamide|C0027270|||C0027270|MSH|||  
NAD|Adenosine 5'-(Trihydrogen Diphosphate), 5'-5'-Ester with 3-(Aminocarbonyl)-1-.Beta.-D-Ribofuranosylpyridinium, Hydroxide, Inner Salt|||C0027270|NCI|||  
NAD|Adenosine 5'-(trihydrogen diphosphate), P'-5'-ester with 3-(aminocarbonyl)-1-beta-D-ribofuranosylpyridinium, inner salt|||C0027270|MSH;NDFRT|||  
NAD|Atypical Nevus|C0205748|||C0205748|NCI|||  
NAD|Atypical naevus|C0205748|||C0205748|SNOMEDCT|||  
NAD|Atypical naevus of skin|C0205748|||C0205748|SNOMEDCT|||  
NAD|Atypical nevus|C0205748|||C0205748|SNOMEDCT|||  
NAD|Atypical nevus of skin|C0205748|||C0205748|SNOMEDCT|||  
NAD|COENZYME A A 01|||C0027270|MSH|||  
NAD|Clark Nevus|C0205748|||C0205748|NCI|||  
NAD|Clark's Nevus|C0205748|||C0205748|NCI|||  
NAD|Co-I|C0027270|||C0027270|NCI|||  
NAD|Codehydrogenase I|C0027270|||C0027270|NCI|||  
NAD|Coenzyme I|C0027270|||C0027270|MSH;NCI;NDFRT|||  
NAD|Cozymase|C0027270|||C0027270|NCI|||  
NAD|DN - Dysplastic naevus|C0205748|||C0205748|SNOMEDCT|||  
NAD|DN - Dysplastic nevus|C0205748|||C0205748|SNOMEDCT|||  
NAD|DPN|C0027270|||C0027270|MSH;NCI;NDFRT|||  
NAD|Dihydronicotinamide Adenine Dinucleotide|C0027270|||C0027270|MSH;NDFRT|||  
NAD|Dinucleotide, Dihydronicotinamide Adenine|C0027270|||C0027270|MSH|||  
NAD|Dinucleotide, Nicotinamide-Adenine|C0027270|||C0027270|MSH|||  
NAD|Diphosphopyridine Nucleotide|C0027270|||C0027270|MSH;NCI;NDFRT|||  
NAD|Dysplastic Nevi|C0205748|||C0205748|MSH|||  
NAD|Dysplastic Nevus|C0205748|||C0205748|MSH;MTH;NCI|||  
NAD|Dysplastic naevus|C0205748|||C0205748|SNOMEDCT|||  
NAD|Dysplastic naevus (disorder)|||C0205748|SNOMEDCT|||  
NAD|Dysplastic naevus of skin|C0205748|||C0205748|SNOMEDCT|||  
NAD|Dysplastic nevus|C0205748|||C0205748|SNOMEDCT|||

NAD|Dysplastic nevus (morphologic abnormality)|||C0205748|SNOMEDCT|||  
NAD|Dysplastic nevus of skin|C0205748||C0205748|SNOMEDCT|||  
NAD|Dysplastic nevus of skin (disorder)|||C0205748|SNOMEDCT|||  
NAD|Lentiginous Nevus|C0205748||C0205748|NCI|||  
NAD|NAD|C0027270||C0027270;C0205748;C1850380|AOD;CSP;MSH;NCI;NDFRT;OMIM|||  
NAD|NAD [Chemical/Ingredient]|||C0027270|NDFRT|||  
NAD|NAD+|C0027270||C0027270|NCI|||  
NAD|NADIDE|C0027270||C0027270|MTHSPL;NCI|||  
NAD|NEUTROPHIL ACTIN DYSFUNCTION|C1850380||C1850380|MTH;OMIM|||  
NAD|Nadide|C0027270||C0027270|MSH;NCI;NDFRT|||  
NAD|Neuroaxonal dystrophy|C0338473|||1|0.0686|  
NAD|Nevi, Dysplastic|C0205748||C0205748|MSH|||  
NAD|Nevus with Architectural Disorder and Cytologic Atypia of  
Melanocytes|||C0205748|NCI|||  
NAD|Nevus, Dysplastic|C0205748||C0205748|MSH|||  
NAD|Nicotinamide Adenine Dinucleotide|C0027270||C0027270|MSH;NCI|||  
NAD|Nicotinamide adenine dinucleotide|C0027270||C0027270|SNOMEDCT|||  
NAD|Nicotinamide adenine dinucleotide (NAD)|C0027270||C0027270|MTH;RXNORM|||  
NAD|Nicotinamide adenine dinucleotide (substance)|||C0027270|SNOMEDCT|||  
NAD|Nicotinamide-Adenine Dinucleotide|C0027270||C0027270|MSH;NDFRT|||  
NAD|Nucleotide, Diphosphopyridine|C0027270||C0027270|MSH|||  
NAD|[M] Dysplastic naevus|||C0205748|SNOMEDCT|||  
NAD|[M] Dysplastic nevus|||C0205748|SNOMEDCT|||  
NAD|[M]Dysplastic naevus|||C0205748|SNOMEDCT|||  
NAD|[M]Dysplastic nevus|||C0205748|SNOMEDCT|||  
NAD|atypical naevus|C0205748||C0205748|CHV|||  
NAD|atypical nevi|C0205748||C0205748|CHV|||  
NAD|atypical nevis|C0205748||C0205748|CHV|||  
NAD|atypical nevus|C0205748||C0205748|CHV|||  
NAD|dehydrogenase|C0030016|||1|0.0289|  
NAD|dihydronicotinamide adenine dinucleotide|C0027270||C0027270|CSP|||  
NAD|dysplastic naevus|C0205748||C0205748|CHV|||  
NAD|dysplastic nevi|C0205748||C0205748|CHV;NCI|||  
NAD|dysplastic nevis|C0205748||C0205748|CHV|||  
NAD|dysplastic nevus|C0205748||C0205748|CHV;NCI|||  
NAD|nad|C0027270||C0027270|CHV|||  
NAD|nadolol|C0027302||C0027302|AOD;CHV;CSP;LCH;LNC;MSH;MTHSPL;NCI;NDFRT;RXNORM;  
SNOMEDCT;USPMG;VANDF|||  
NAD|naevus dysplastic|||C0205748|CHV|||  
NAD|neuroaxonal dystrophy|C0338473||C0338473|MSH;OMIM;SNOMEDCT|||  
NAD|nevus with architectural disorder|||||||1  
NAD|new antigenic determinant|||||||1  
NAD|nicotinamide adenine dinucleotide|C0027270||C0027270|CSP|1|0.8123|1  
NAD|nicotinamide adenine dinucleotide (NAD)|C0027270||C0027270|CHV|||  
NAD|nicotinamide-adenine dinucleotide|C0027270||C0027270|AOD;MSH;NDFRT|||  
NAD|nicotinic acid dehydrogenase|||||||1  
NAD|no abnormal discovery|||||||1  
NAD|no abnormality demonstrable|||||||1  
NAD|no active disease|||||||1  
NAD|no acute disease|||||||1  
NAD|no acute distress||1|0.754|||1  
NAD|no apparent distress|||||||1  
NAD|no appreciable disease|||||||1  
NAD|noradrenaline|C0028351;C0202145|||1|0.0903|  
NAD|normal axis deviation|C1512122||C1512122|NCI|||1  
NAD|nothing abnormal detected||1|0.246|||1  
NAD|nothing abnormal discovered|||||||1

NAD|sodium dialysate|||||1  
NA|Country of Namibia|C0027366|||C0027366|MTH|||  
NA|Dietary Sodium|C0037570|||C0037570|MEDLINEPLUS;MSH;NCI;NDFRT|||  
NA|Dosage Form Not Applicable|||C1705113|MTH;NCI|||  
NA|N-acetyl|||||1|0.0029|  
NA|N-acetyl compounds|||||1|0.0009|  
NA|N/A|||C1272460|NCI;SNOMEDCT|||  
NA|NA|C0597484;C1272460|||C0027366;C1272460;C1417587;C1705113;C1705512;C2700321|HUGO;NCI|||  
NA|NA gene|C1417587|||C1417587|HUGO;MTH|||  
NA|NAM|C0027366;C2826269|||C0027366|NCI|||  
NA|NAMIBIA|C0027366;C1504632|||C0027366|NCI|||  
NA|NOT APPLICABLE|C1272460|||C1272460;C1705113;C1705512|NCI|||  
NA|Na|C0597484;C1272460|||C0037473;C0037570|AOD;CHV;NCI|||  
NA|Na - Sodium|C0037473|||C0037473|SNOMEDCT|||  
NA|Na element|C0037473;C0597484|||C0037473|CSP|||  
NA|Nadia|C2700321|||C2700321|NCI|||  
NA|Nadia - zebrafish|C2700321|||C2700321|MTH|||  
NA|Nadia Zebrafish|C2700321|||C2700321|NCI|||  
NA|Namibia|C0027366;C1504632|||C0027366|AOD;LCH;MSH;NCI;SNOMEDCT|||  
NA|Namibia (geographic location)|||C0027366|SNOMEDCT|||  
NA|Naphthalene|C0027375;C0027378|||||1|0.0022|  
NA|Narcotics Anonymous||1|0.948|||||1  
NA|Nephrogenic adenoma|C0334039|||||1|0.0019|  
NA|No unit of measure required|||C1272460|NCI|||  
NA|Nomina Anatomica|||||1  
NA|None or Not Applicable|||C1272460|NCI|||  
NA|North America|C0028405|||||1|0.0019|  
NA|North American|C0425358;C2700615|||||1|0.0036|  
NA|Not Applicable|C1272460|||C1272460;C1705113|MTH;NCI|||  
NA|Not applicable|C1272460|||C1272460|NCI;SNOMEDCT|||  
NA|Not applicable (qualifier value)|||C1272460|SNOMEDCT|||  
NA|Republic of Namibia|C0027366|||C0027366|MSH|||  
NA|Route of Administration Not Applicable|||C1705512|MTH;NCI|||  
NA|SODIUM|C0037473;C0037570;C0597484|||C0037473|NDFRT;VANDF|||  
NA|Sodium|C0037473;C0037570;C0597484|||C0037473;C0037570|LCH;LNC;MSH;MTH;NCI;NDFRT;RXNORM;SNOMEDCT;USPMG|||  
NA|Sodium (NOS)|C0037473;C0037570;C0597484|||C0037473|NCI|||  
NA|Sodium (substance)|||C0037473|SNOMEDCT|||  
NA|Sodium [Chemical/Ingredient]|||C0037473|NDFRT|||  
NA|Sodium product|C0037473|||C0037473|SNOMEDCT|||  
NA|Sodium product (product)|||C0037473|SNOMEDCT|||  
NA|Sodium product (substance)|||C0037473|SNOMEDCT|||  
NA|Sodium, Dietary|C0037570|||C0037570|MEDLINEPLUS;MSH;MTH;NDFRT|||  
NA|Sodium, Dietary [Chemical/Ingredient]|||C0037570|NDFRT|||  
NA|Sodium, NOS|C0037473;C0037570;C0597484|||C0037473|SNOMEDCT|||  
NA|South West Africa|C0027366|||C0027366|MSH|||  
NA|Southwest Africa|C0027366|||C0027366|MSH|||  
NA|WA|C0043038|||C0027366|NCI|||  
NA|[3H]-noradrenaline|||||1|0.0055|  
NA|[TN440] SODIUM|C0037473|||C0037473|NDFRT|||  
NA|a n|C1272460|||C1272460|CHV|||  
NA|activity|C0026606;C0205177;C0439167;C0441655;C1561536|||||1|0.0036|  
NA|applicable|C1272460;C1706839|||C1272460|CHV|||  
NA|concentration|C0086045;C1446561|||||1|0.0015|  
NA|dietary sodium|C0037570|||C0037570|CSP|||  
NA|influenza virus neuraminidase|||||1|0.0067|

NA|n a||||C1272460|CHV|||  
NA|na sodium|C0037473|||C0037473|CHV|||  
NA|naked neck|||||1|0.0015|  
NA|nalidixic  
acid|C0027353|||C0027353|CHV;MSH;MTHSPL;NCI;NDFRT;RXNORM;SNOMEDCT;USPMG;VANDF|1|  
0.0134|1  
NA|namibia|C0027366;C1504632|||C0027366|CHV|||  
NA|nanoampere|||||1  
NA|naphthenic acid|C0068418|||C0068418|MSH|||  
NA|nasopharyngeal angiofibroma|C1367536|||||1  
NA|needle aspiration|C0181959;C2243017|||||1  
NA|negative affect|||||1|0.0077|  
NA|negative affectivity|||||1|0.0062|  
NA|nephrogenic adenoma|C0334039|||||1  
NA|neuraminidase|C0027803|||C0027803|CHV;CSP;LNC;MSH;MTH;NDFRT;SNOMEDCT|||1  
NA|neurocanthocytosis|C1417587|||C1417587|HUGO|||  
NA|neurologic age|||||1  
NA|neuropathic arthropathy|C0003892|||||1  
NA|neutralizing antibodies|C0475463;C1142254|||||1|0.0087|  
NA|neutralizing antibody|C0475463|||C0475463|CHV;CSP;MSH;NDFRT;SNOMEDCT|||1  
NA|neutrophil antibody|C0807098|||C0807098|CHV;LNC|||1  
NA|neutrophil antigen|||||1|0.001|  
NA|new admission|||||1  
NA|nicotianamine|C0660841|||||1|0.0017|  
NA|nicotinamide|C0028027;C1142101|||C0028027;C1142101|AOD;CHV;CSP;LNC;MSH;NCI;ND  
FRT;PDQ;SNOMEDCT|1|0.0099|1  
NA|nicotinic  
acid|C0027996;C0028049|||C0027996;C0028049|AOD;CHV;MSH;NCI;NDFRT;PDQ;SNOMEDCT;US  
PMG;VANDF|1|0.0183|1  
NA|nitrosamine|C0028197|||C0028197|AOD;CHV;CSP;NCI;SNOMEDCT|||  
NA|nitrous acid|C0028214|||C0028214|AOD;CSP;LCH;MSH;NDFRT;SNOMEDCT|||  
NA|no abnormality|||||1  
NA|nocturnal asthma|||||1|0.0022|  
NA|nodular amyloidoma|||||1  
NA|non-A|||||1  
NA|non-adherent|||||1|0.0015|  
NA|nonadherent|||||1|0.0038|1  
NA|nonalcoholic|||||1  
NA|nonamniotic|||||1  
NA|nonmyelinated axon|C0682683|||||1  
NA|noradrenalin|C0028351;C0202145|||||1|0.0069|  
NA|noradrenaline|C0028351;C0202145|||C0028351;C0202145|AOD;CHV;CSP;FMA;MSH;NCI;N  
DFRT;SNOMEDCT;UWDA|1|0.685|  
NA|noradrenaline-storing|||||1|0.0024|  
NA|noradrenergic|C0599861|||||1|0.0332|  
NA|norepinephrine|C0028351|||||1|0.0051|  
NA|norethindrone  
acetate|C0068980|||C0068980|CHV;MSH;MTHSPL;NCI;NDFRT;PDQ;RXNORM;SNOMEDCT;USPMG;V  
ANDF|1|0.0019|  
NA|normal axis|||||1  
NA|nosocomially acquired|||||1  
NA|not admitted|||||1  
NA|not antagonized|||||1  
NA|not  
applicable|C1272460|1|0.020|C1272460;C1546968;C1547280;C1549103;C1609491;C161004  
4;C1610595;C1611147;C1619691;C1705112;C1705113;C1705512|HL7V2.5;HL7V3.0;MTH;NCI;  
SNOMEDCT|||1



NG|Nasogastric Route of Administration|C0694637|||C0694637|NCI|||  
NG|Nasogastric Route of Drug Administration|C0694637|||C0694637|MTH|||  
NG|Nasogastric route|C0694637|||C0694637|SNOMEDCT|||  
NG|Nasogastric route (qualifier value)|||C0694637|SNOMEDCT|||  
NG|Nasogastric use|C0694637|||C0694637|SNOMEDCT|||  
NG|Neisseria gonorrhoeae|C0027573|||1|0.1028|1  
NG|Ng|||C0694637|LNC|||  
NG|Niger|C0028074;C0997002|||C0028074|AOD;LCH;MSH;MTH;NCI;SNOMEDCT|||  
NG|Niger (geographic location)|||C0028074|SNOMEDCT|||  
NG|Nigeria|C0028075|||C0028075|AOD;LCH;MSH;MTH;NCI;SNOMEDCT|||  
NG|Nigeria (geographic location)|||C0028075|SNOMEDCT|||  
NG|Nitroglycerine|C0017887;C0885378|||1|0.0308|  
NG|Nitrosomethylnitroguanidine|C0025800|||C0025800|MSH;NDFRT|||  
NG|Nitrosomethylguanidine|C0025800|||C0025800|MSH;NDFRT|||  
NG|Not treated for|||C0332155|SNOMEDCT|||  
NG|Republic of Niger|C0028074|||C0028074|MSH|||  
NG|did not receive therapy or drug for|C0332155|||C0332155|CHV|||  
NG|group|C0441833;C0687744;C1257890;C1552516;C1705428;C1705429|||1|0.0591|  
NG|levonorgestrel|C0023566|||1|0.0257|  
NG|nanogram|C0439212|||C0439212|CHV;MTH;NCI;SNOMEDCT|||1  
NG|nanogram (ng)|C0439212|||C0439212|CHV|||  
NG|nanogram (qualifier value)|||C0439212|SNOMEDCT|||  
NG|nanogram(s)|||C0439212|NCI|||  
NG|nanograms|C0439212|||C0439212|CHV|||  
NG|nasogastric|C0694637|1|1.000|C0694637|CHV;HL7V2.5;NCI;SNOMEDCT|||1  
NG|net grains/nucleus|||1|0.0231|  
NG|neurogranin|C0083727;C1417847|||C0083727;C1417847|MSH;MTH;NDFRT;OMIM|1|0.0386|  
|  
NG|neutrophil granulocytes|||1|0.018|  
NG|new growth|C0027651|||1|  
NG|ng|||C0439212|CHV;NCI;SNOMEDCT|||  
NG|ng (qualifier value)|||C0439212|SNOMEDCT|||  
NG|niger|C0028074;C0997002|||C0028074|CHV|||  
NG|nigeria|C0028075|||C0028075|CHV|||  
NG|night guard|||1|  
NG|nitroglycerin|C0017887;C0885378|||1|0.2005|  
NG|nitroglycerine|C0017887;C0885378|||C0017887;C0885378|AOD;CHV|||  
NG|nitrosoguanidine|C0028203|||C0028203|CSP|1|0.0231|  
NG|no good|||1|  
NG|no growth|C0445119|||1|  
NG|nodose ganglia|C0028252|||1|0.054|  
NG|nodose ganglion|C0028252|||C0028252|FMA;MSH;UWDA|1|0.0668|1  
NG|nodular  
goiter|C0018023;C1318500|||C0018023;C1318500|CHV;MSH;MTH;NDFRT;OMIM;SNOMEDCT|1|0.0231|  
NG|nongenetic|||1|  
NG|nongroupable|||1|  
NG|norgestrel|C0028368|||C0028368|AOD;CHV;LCH;MSH;MTHSPL;NCI;NDFRT;PDQ;RXNORM;SNOMEDCT;USPMG;VANDF|1|0.036|  
NG|normal glucose|C0860800|||C0860800|CHV|1|0.0283|  
NG|not given|||1|  
NG|nuclear grade|C1518435|||C1518435|CHV;NCI|1|0.054|  
NG|untreated|C0332155|||C0332155|CHV|||  
NJ|NJ|C0027971|||C0027971|NCI|||  
NJ|New Jersey|C0027971|1|0.002|C0027971|AOD;LCH;MSH;NCI;SNOMEDCT|1|0.3426|  
NJ|New Jersey (geographic location)|||C0027971|SNOMEDCT|||  
NJ|jersey new|C0027971|||C0027971|CHV|||

NJ|nanojoule|||||1  
NJ|nasojejunal||1|0.998|C0595833|SNOMEDCT|||1  
NJ|neighbor-joining|||||1|0.5556|  
NJ|neighbour-joining|||||1|0.1019|  
NJ|new jersey|C0027971|||C0027971|CHV|||  
NKDA|no known drug allergies|C0262581|1|1.000|||||1  
NO|Lymph Node Stage N0|C0441959|||C0441959|NCI|||  
NO|N|C0369718;C0441922;C1553036|||C1298908|NCI|||  
NO|N0|C0441959|||C0441959|NCI|||  
NO|N0 Cancer Stage Finding|C0441959|||C0441959|NCI|||  
NO|N0 Lymph Node Finding|C0441959|||C0441959|NCI|||  
NO|N0 Lymph Node Stage|C0441959|||C0441959|NCI|||  
NO|N0 Node Finding|C0441959|||C0441959|NCI|||  
NO|N0 Node Stage|C0441959|||C0441959|NCI|||  
NO|N0 Regional Lymph Node Stage Finding|C0441959|||C0441959|NCI|||  
NO|N0 Regional Lymph Nodes Finding|||C0441959|NCI|||  
NO|N0 Stage|C0441959|||C0441959|NCI|||  
NO|N0 Stage Finding|C0441959|||C0441959|NCI|||  
NO|N0 TNM Finding|C0441959|||C0441959|NCI|||  
NO|N0 category|C0441959|||C0441959|SNOMEDCT|||  
NO|N0 category (finding)|||C0441959|SNOMEDCT|||  
NO|N0 stage|C0441959|||C0441959|SNOMEDCT|||  
NO|N0 stage (finding)|C0441959|||C0441959|SNOMEDCT|||  
NO|N0 stage (tumor staging)|||C0441959|SNOMEDCT|||  
NO|NO|C1298908;C1549444|||C0028423;C0441959;C1298908|NCI;SNOMEDCT|||  
NO|NOR|||C0028423|NCI|||  
NO|NORWAY|C0028423|||C0028423|NCI|||  
NO|Nitric oxide|C0028128|||||1|0.0099|  
NO|No|C1298908;C1549444|||C1298908;C1546943;C1546946;C1546967;C1548170;C1549056;  
C1549062;C1549442;C1549444|HL7V2.5;NCI;SNOMEDCT|||  
NO|No (qualifier value)|||C1298908|SNOMEDCT|||  
NO|No - Assignment of Benefits|C1549442|||C1549442|MTH|||  
NO|No - Event Expected|||C1546946|MTH|||  
NO|No - Event Seriousness|C1546943|||C1546943|MTH|||  
NO|No - Expanded yes/no indicator|C1549056|||C1549056|MTH|||  
NO|No - Identity May Be Divulged|||C1546967|MTH|||  
NO|No - Notify Clergy Code|C1549062|||C1549062|MTH|||  
NO|No - Release Information|C1548170|||C1548170|MTH|||  
NO|No - yes/no indicator|C1549444|||C1549444|MTH|||  
NO|Node Stage N0|C0441959|||C0441959|NCI|||  
NO|Node stage N0|C0441959|||C0441959|MTH;SNOMEDCT|||  
NO|Node stage N0 (tumor staging)|||C0441959|SNOMEDCT|||  
NO|Norway|C0028423|||C0028423|AOD;CSP;LCH;MSH;MTH;NCI;SNOMEDCT|||  
NO|Norway (geographic location)|||C0028423|SNOMEDCT|||  
NO|concentration|C0086045;C1446561|||||1|0.0009|  
NO|nasal oxygen|||||1  
NO|nitric  
oxide|C0028128|1|0.002|C0028128|AOD;CHV;CSP;MSH;MTH;MTHSPL;NCI;NDFRT;RXNORM;SNOM  
EDCT;VANDF|1|0.9849|1  
NO|nitric oxide gas|C0028128|||||1|0.0003|  
NO|nitric oxide radical|||||1|0.0003|  
NO|nitrogen monoxide|C0028128|||C0028128|MSH;NDFRT;SNOMEDCT|1|0.0027|  
NO|nitroso-|||||1  
NO|nitrous  
oxide|C0028215|||C0028215|AOD;CHV;CSP;LCH;LNC;MSH;MTH;MTHSPL;NCI;NDFRT;RXNORM;SN  
OMEDCT;VANDF|||  
NO|no|C1298908;C1549444|||C1298908|CHV;MTH|||

NO|no)|C1298908;C1549444|||C1298908|LNC|||  
NO|nobelium|C0028237|||1|1|  
NO|nodes|C0746922|||1|0.0004|  
NO|none obtained|||1|1|  
NO|nonobese|||1|1|  
NO|normal|C0205307;C0439166;C2347086|||C0205307;C0558145;C1550457;C1550469;C1551394;C1553386;C1553399;C1553402;C1553406;C1704701;C1873497;C2698497|CHV;HL7V2.5;HL7V3.0;LNC;MTH;NCI;OMIM;SNOMEDCT|||  
NO|norway|C0028423|||C0028423|CHV|||  
NO|not operable|||1|1|  
NO|nucleolar organizer|C0028609|||C0028609|MSH|1|0.0003|  
NO|nucleolus organizer|||1|0.0003|  
NO|number|C0237753;C0449788|1|0.004|||1|  
NOS|EC 1.14.13.39|||C0132555|NCI|||  
NOS|Endothelium-derived relaxation factor-forming enzyme|||C0132555|SNOMEDCT|||  
NOS|Endothelium-derived relaxing factor synthase|C0132555|||C0132555|SNOMEDCT|||  
NOS|HEP-NOS|C0669372;C1417760|||C0669372;C1417760|HUGO;NCI|||  
NOS|HEP-NOS protein, human|C0669372|||C0669372|MSH|||  
NOS|Hepatocyte Nitric Oxide Synthase|C0669372|||C0669372|NCI|||  
NOS|INOS|C0669372;C1417760;C1968833|||C0669372;C1417760|NCI;OMIM|||  
NOS|Inducible Nitric Oxide Synthase|C0669372;C1417760;C1533698|||C0669372|NCI|||  
NOS|L-Arginine,NADPH:oxygen oxidoreductase (nitric-oxide-forming)|||C0132555|MSH;NDFRT|||  
NOS|Macrophage Nitric Oxide Synthase|C0669372;C1417760|||C0669372|NCI|||  
NOS|NADPH-Diaphorase|C0027312;C0132555|||C0132555|NCI|||  
NOS|NITRIC OXIDE SYNTHASE 2A|C0669372;C1417760|||C1417760|OMIM|||  
NOS|NITRIC OXIDE SYNTHASE, INDUCIBLE|C0669372;C1417760;C1533698|||C1417760|OMIM|||  
NOS|NITRIC OXIDE SYNTHASE, MACROPHAGE|C0669372;C1417760|||C1417760|OMIM|||  
NOS|NO Synthase|C0132555|||C0132555|MSH;NCI;NDFRT|||  
NOS|NO synthase|C0132555|||C0132555|CSP|||  
NOS|NO-synthase|C0132555|||1|0.0134|  
NOS|NOS|C1518425|||C0132555;C0669372;C1417760;C1518425;C1705516|CSP;HUGO;LNC;NCI|||  
NOS|NOS Type II|C0669372|||C0669372|NCI|||  
NOS|NOS1 wt Allele|C1705516|||C1705516|MTH;NCI|||  
NOS|NOS2|||C0669372;C1417760|HUGO;NCI;OMIM|||  
NOS|NOS2 gene|C1417760|||C1417760|HUGO;MTH|||  
NOS|NOS2 protein, human|C0669372|||C0669372|MSH|||  
NOS|NOS2A|C0669372;C1417760|||C0669372;C1417760|NCI;OMIM|||  
NOS|NOS2A Gene|C1417760|||C1417760|NCI|||  
NOS|NOS2A protein, human|C0669372|||C0669372|MTH;MSH|||  
NOS|NOS2A, INDUCIBLE, HEPATOCYTE|C1417760|||C1417760|OMIM|||  
NOS|Nanos2 protein, human|C0669372|||C0669372|MSH|||  
NOS|Nitric Oxide Synthase|C0132555|||C0132555|MSH;MTH;NCI;NDFRT|||  
NOS|Nitric Oxide Synthase 1 (Neuronal) wt Allele|||C1705516|NCI|||  
NOS|Nitric Oxide Synthase 2A|C0669372;C1417760|||C0669372|NCI|||  
NOS|Nitric Oxide Synthase 2A (Inducible, Hepatocytes) Gene|||C1417760|NCI|||  
NOS|Nitric Oxide Synthase [Chemical/Ingredient]|||C0132555|NDFRT|||  
NOS|Nitric Oxide Synthetase|C0132555|||C0132555|MSH;NCI|||  
NOS|Nitric oxide synthetase|C0132555|||1|0.0101|  
NOS|Nitric-Oxide Synthase|C0132555|||C0132555|MSH;NCI;NDFRT|||  
NOS|Nitric-Oxide Synthetase|C0132555|||C0132555|MSH;NDFRT|||  
NOS|Nitric-oxide synthase|C0132555|||C0132555|SNOMEDCT|||  
NOS|Nitric-oxide synthase (substance)|||C0132555|SNOMEDCT|||  
NOS|Not Otherwise Specified|C1518425|||C1518425|MTH;NCI|||  
NOS|Not Specified|||C1518425|NCI|||

NOS|Not otherwise specified|C1518425|||C1518425|NCI|||  
NOS|Oxide Synthase, Nitric|C0132555|||C0132555|MSH|||  
NOS|Synthase, Nitric Oxide|C0132555|||C0132555|MSH|||  
NOS|hepatocyte NOS protein, human|C0669372|||C0669372|MSH|||  
NOS|iNOS|C0669372;C1417760;C1968833|||C1417760|HUGO|||  
NOS|iNOS protein, human|C0669372|||C0669372|MSH|||  
NOS|inducible nitric oxide 2A, human|C0669372|||C0669372|MSH|||  
NOS|network operating system|||||1  
NOS|new-onset seizures|C0748604|||||1  
NOS|nitric oxide synthase|C0132555|||C0132555|CHV;CSP;MSH;MTH;NCI;NDFRT|1|0.9485|1  
NOS|nitric oxide synthase 2, inducible|C1417760|||C1417760|HUGO|||  
NOS|nitric oxide synthase 2A (inducible, hepatocytes), human|||C0669372|MSH|||  
NOS|nitric oxide synthases|C0132555|||C0132555|CHV|||  
NOS|nitric oxide synthesis|C1157570|||C1157570|GO|1|0.0027|  
NOS|nitric oxide synthetase|C0132555|||C0132555|CHV;MSH;NCI|||  
NOS|nitrous oxide synthase|||||1  
NOS|no organisms seen|||||1  
NOS|nonorgan-specific|||||1  
NOS|nopaline synthase|C0068949|||C0068949|MSH|||  
NOS|not on staff|||||1  
NOS|not otherwise specified|C1518425|1|0.986|C1518425|MTH;NCI|1|0.0253|1  
NOS|numbers|C0237753;C0449788|||||1  
NOS|synthase|C0132555|||C0132555|CHV|||  
NOS|{NOS}|C1518425|||C1518425|NCI|||  
NPH|Familial juvenile nephronophthisis|C0687120;C1855681|||||1|0.0395|  
NPH|HYDROCEPHALUS, NORMAL-PRESSURE|C0020258|||C0020258|OMIM|||  
NPH|Hakim Syndrome|C0020258|||C0020258|MSH;NDFRT|||  
NPH|Hakim Syndromes|C0020258|||C0020258|MSH|||  
NPH|Hakim's Syndrome|C0020258|||C0020258|MSH;NDFRT|||  
NPH|Hakim's Syndromes|C0020258|||C0020258|MSH|||  
NPH|Hakims Syndrome|C0020258|||C0020258|MSH|||  
NPH|Hydrocephalus, Normal Pressure|C0020258|||C0020258|MSH;NDFRT|||  
NPH|Hydrocephalus, Normal Pressure [Disease/Finding]||||C0020258|NDFRT|||  
NPH|Low pressure hydrocephalus|C0020258|||C0020258|SNOMEDCT|||  
NPH|Low pressure hydrocephalus (disorder)||||C0020258|SNOMEDCT|||  
NPH|NORMAL PRESSURE HYDROCEPHALUS|C0020258|||C0020258|COSTAR;DXP;QMR|||  
NPH|NPH|C0020258|||C0020258|DXP|||  
NPH|NPH (Normal Pressure Hydrocephalus)|C0020258|||C0020258|MSH;NDFRT|||  
NPH|NPH - Normal pressure hydrocephalus|C0020258|||C0020258|SNOMEDCT|||  
NPH|NPH insulin|C0021658|||||1|0.0243|  
NPH|NPHs (Normal Pressure Hydrocephalus)||||C0020258|MSH|||  
NPH|Normal Pressure Hydrocephalus|C0020258|||C0020258|MSH;NDFRT|||  
NPH|Normal pressure hydrocephalus|C0020258|||C0020258|OMIM;SNOMEDCT|||  
NPH|Normal pressure hydrocephalus (disorder)||||C0020258|SNOMEDCT|||  
NPH|Normal pressure hydrocephalus NOS|C0020258|||C0020258|MTHICD9|||  
NPH|Nph|C0020258|||C0020258|LNC|||  
NPH|Syndrome, Hakim|C0020258|||C0020258|MSH|||  
NPH|Syndrome, Hakim's|C0020258|||C0020258|MSH|||  
NPH|Syndromes, Hakim|C0020258|||C0020258|MSH|||  
NPH|Syndromes, Hakim's|C0020258|||C0020258|MSH|||  
NPH|hakim syndrome|C0020258|||C0020258|CHV|||  
NPH|hydrocephalis normal pressure||||C0020258|CHV|||  
NPH|hydrocephalus normal nph pressure|C0020258|||C0020258|CHV|||  
NPH|hydrocephalus normal pressure|C0020258|||C0020258|CHV|||  
NPH|hydrocephalus pressure normal||||C0020258|CHV|||  
NPH|low pressure hydrocephalus|C0020258|||C0020258|CHV|||

NPH|nephronophthisis|C0687120|||C0687120|CHV;MTH;OMIM;SNOMEDCT|||1  
NPH|neutral protamine Hagedorn|||||1|0.155|  
NPH|neutral protamine hagedorn||1|1.000|||||  
NPH|no previous history|||||1  
NPH|normal pressure hydrocephalus|C0020258|||C0020258|CHV|1|0.6626|  
NPH|normal pressure hydrocephalus (nph)|C0020258|||C0020258|CHV|||  
NPH|normal pressure hydrocephaly|C0020258|||C0020258|CHV|||  
NPH|normal-pressure hydrocephalus|C0020258|||C0020258|CHV|||1  
NPH|nph|C0020258|||C0020258|CHV|||  
NPH|nucleus prepositus hypoglossi|C0152399|||C0152399|FMA|1|0.0699|  
NPH|nucleus pulposus herniation|||||1  
NPH|patients with normal-pressure hydrocephalus|||||1|0.0486|  
NPO|Fasting patient|C0419179|||C0419179|SNOMEDCT|||  
NPO|NBM|||C0419179|SNOMEDCT|||  
NPO|NBM - Nil by mouth|C0419179|||C0419179|SNOMEDCT|||  
NPO|NON PROFIT ORGAN|||C0029247|MSH|||  
NPO|NONPROFIT ORGAN|||C0029247|MSH|||  
NPO|NPO|C0029247;C0419179|||C0029247;C0419179|NCI;SNOMEDCT|||  
NPO|NPO - Nothing by mouth|C0419179|||C0419179|MTH;SNOMEDCT|||  
NPO|Nil by mouth|C0419179|||C0419179|SNOMEDCT|||  
NPO|Nil by mouth (procedure)|||C0419179|SNOMEDCT|||  
NPO|Nil by mouth (regime/therapy)|||C0419179|SNOMEDCT|||  
NPO|Nil per os|C0419179|||C0419179|SNOMEDCT|||  
NPO|Non Profit Organizations|C0029247|||C0029247|MSH|||  
NPO|Non-Profit Organization|C0029247|||C0029247|MSH|||  
NPO|Non-Profit Organizations|C0029247|||C0029247|MSH|||  
NPO|Non-profit|C0029247|||C0029247|NCI|||  
NPO|Nonprofit|C0029247|||C0029247|NCI|||  
NPO|Nonprofit Group|C0029247|||C0029247|NCI|||  
NPO|Nonprofit Organization|C0029247|||C0029247|MSH;NCI|||  
NPO|Nonprofit Organizations|C0029247|||C0029247|MSH;MTH|||  
NPO|Not for Profit Organization|C0029247|||C0029247|NCI|||  
NPO|Nothing by Mouth|C0419179|||C0419179|NCI|||  
NPO|Nothing by mouth|C0419179|||C0419179|SNOMEDCT|||  
NPO|Nothing by mouth (procedure)|||C0419179|SNOMEDCT|||  
NPO|ORGAN NON PROFIT|||C0029247|MSH|||  
NPO|ORGAN NONPROFIT|||C0029247|MSH|||  
NPO|Organization, Non-Profit|C0029247|||C0029247|MSH|||  
NPO|Organization, Nonprofit|C0029247|||C0029247|MSH|||  
NPO|Organizations, Non Profit|C0029247|||C0029247|MSH|||  
NPO|Organizations, Non-Profit|C0029247|||C0029247|MSH|||  
NPO|Organizations, Nonprofit|C0029247|||C0029247|MSH|||  
NPO|Starving the patient|||C0419179|SNOMEDCT|||  
NPO|channel activity|C1153410|||||1|0.1098|  
NPO|fasting patients|C0419179|||C0419179|CHV|||  
NPO|neurogenic pulmonary edema|C0340098|||C0340098|CHV;SNOMEDCT|||  
NPO|nil by mouth|C0419179|||C0419179|CHV|||  
NPO|nil per os|C0419179|||C0419179|CHV;SNOMEDCT|||  
NPO|nil peros|C0419179|||C0419179|NCI|||  
NPO|non profit organizations|C0029247|||C0029247|CHV|||  
NPO|non-profit organizations|C0029247|||C0029247|CHV|||  
NPO|nonprofit|C0029247|||C0029247|AOD;CHV|||  
NPO|nonprofit organization|C0029247|||C0029247|AOD|||  
NPO|nonprofit organizations|C0029247|||C0029247|CHV|||  
NPO|nonprofits|C0029247|||C0029247|CHV|||  
NPO|nothing by mouth|C0419179|1|1.000|C0419179|CHV|||1  
NPO|nucleus pontis oralis|||||1|0.122|

NPO|nucleus preopticus|||||1|0.3659|1  
NPO|open probability|||||1|0.4024|  
NPO|patients starving|||C0419179|CHV||  
NP|(drug) NP||1|0.002||||  
NP|1-nitropyrene|C0044508|||C0044508|MSH;NCI|1|0.0142|  
NP|4-hydroxy-3-nitrophenyl acetyl|C0048309|||||1|0.0118|  
NP|4-hydroxy-3-nitrophenylacetyl|C0048309|||||1|0.0053|  
NP|4-nonylphenol|C0097405|||||1|0.0266|  
NP|CAGH1|C1420834|||C1420834|OMIM||  
NP|CAGH1A|C1420834|||C1420834|HUGO||  
NP|CAS-INTERACTING ZINC FINGER PROTEIN|||C1420834|OMIM||  
NP|CIZ|C1420834|||C1420834|HUGO;OMIM||  
NP|CTF2P|C1824810|||C1824810|HUGO||  
NP|CTF2P gene|C1824810|||C1824810|HUGO;MTH||  
NP|EC 2.4.2.1||||C0034135|NCI||  
NP|Inosine Phosphorylase|C0034135|||C0034135|MSH;NDFRT||  
NP|Inosine phosphorylase|C0034135|||C0034135|SNOMEDCT||  
NP|NEPAL|C0027689|||C0027689|NCI||  
NP|NMP4|C1420834|||C1420834|HUGO;OMIM||  
NP|NP|C0028657|||C0027689;C0028657;C0034135;C0332124;C1417772;C1420834;C1824810|  
HUGO;NCI;OMIM;SNOMEDCT||  
NP|NP Gene|C1417772|||C1417772|NCI||  
NP|NPL|C0027689;C1150873;C1424540|||C0027689|NCI||  
NP|NUCLEAR MATRIX PROTEIN 4|C1420834|||C1420834|OMIM||  
NP|NUCLEOSIDE PHOSPHORYLASE|C0133234;C1417772|||C1417772|OMIM||  
NP|Nasal polyposis|C0027430|||||1|0.0207|  
NP|Nepal|C0027689|||C0027689|AOD;LCH;MSH;MTH;NCI;SNOMEDCT||  
NP|Nepal (geographic location)|||C0027689|SNOMEDCT||  
NP|Niemann-Pick|||||1|  
NP|No past history|C0332124|||C0332124|MTH||  
NP|No past history of|||C0332124|SNOMEDCT||  
NP|No past history of (contextual qualifier)|||C0332124|SNOMEDCT||  
NP|No past history of (contextual qualifier) (qualifier  
value)|||C0332124|SNOMEDCT||  
NP|Nucleoside Phosphorylase Gene|C1417772|||C1417772|NCI||  
NP|Nucleoside Phosphorylases, Purine|C0034135|||C0034135|MSH||  
NP|Nurse Practitioner|C0028657|||C0028657|MSH;NCI||  
NP|Nurse Practitioners|C0028657|||C0028657|MSH||  
NP|Nurse practitioner|C0028657|||C0028657|LNC;SNOMEDCT||  
NP|Nurse practitioner (occupation)|||C0028657|SNOMEDCT||  
NP|Nurse practitioners|C0028657|||C0028657|LCH||  
NP|PNP|||C0034135;C1417772|HUGO;NCI;OMIM||  
NP|PNP - Purine nucleoside phosphorylase|C0034135|||C0034135|SNOMEDCT||  
NP|PNP Human|C0034135|||C0034135|NCI||  
NP|PNP gene|C1417772|||C1417772|HUGO;MTH||  
NP|PUNP|C1417772|||C1417772|HUGO||  
NP|PURINE NUCLEOSIDE PHOSPHORYLASE|C0034135;C1417772|||C1417772|OMIM||  
NP|PURINE-NUCLEOSIDE:ORTHOPHOSPHATE RIBOSYLTRANSFERASE|||C1417772|OMIM||  
NP|Phosphorylase, Inosine|C0034135|||C0034135|MSH||  
NP|Phosphorylase, Purine-Nucleoside|C0034135;C1417772|||C0034135|MSH||  
NP|Phosphorylases, Purine Nucleoside|C0034135|||C0034135|MSH||  
NP|Practitioner, Nurse|C0028657|||C0028657|MSH||  
NP|Practitioners, Nurse|C0028657|||C0028657|MSH||  
NP|Purine Nucleoside Phosphorylase|C0034135;C1417772|||C0034135|MSH;NCI||  
NP|Purine Nucleoside Phosphorylases|C0034135|||C0034135|MSH;NDFRT||  
NP|Purine nucleoside phosphorylase|C0034135;C1417772|||C0034135|LNC;SNOMEDCT||  
NP|Purine-Nucleoside Phosphorylase|C0034135;C1417772|||C0034135|MSH;MTH;NDFRT||

NP|Purine-Nucleoside Phosphorylase [Chemical/Ingredient]||||C0034135|NDFRT|||  
NP|Purine-nucleoside phosphorylase|C0034135;C1417772|||C0034135|SNOMEDCT|||  
NP|Purine-nucleoside phosphorylase (substance)|||C0034135|SNOMEDCT|||  
NP|Purine-nucleoside:orthophosphate ribosyltransferase|||C0034135|MSH;NDFRT|||  
NP|ZINC FINGER PROTEIN 384|C1420834|||C1420834|OMIM|||  
NP|ZNF384|C1420834|||C1420834|HUGO;OMIM|||  
NP|ZNF384 gene|C1420834|||C1420834|HUGO;MTH|||  
NP|alcohol nonpreferring|||||1|0.0041|  
NP|anti-(4-hydroxy-3-nitrophenyl)acetyl|||||1|0.0112|  
NP|cardiotrophin 2, pseudogene|C1824810|||C1824810|HUGO|||  
NP|hapten (4-hydroxy-3-nitrophenyl)acetyl|||||1|0.0106|  
NP|influenza virus nucleoprotein|||||1|0.0266|  
NP|inosine phosphorylase|C0034135|||C0034135|CSP|||  
NP|metabolite norpropoxyphene|||||1|0.003|  
NP|nanoparticle|C1450054|||C1450054|MSH;NCI|||  
NP|nanoparticles|C1450054|||||1|0.0337|  
NP|nasal polyp|C0027430|||C0027430|CHV;COSTAR;CST;MSH;NCI;SNOMEDCT|||1  
NP|nasal polyps|C0027430|||||1|0.0236|  
NP|nasal prong|C0445087|||C0445087|CHV|||  
NP|nasal prongs|C0445087|||||1|  
NP|nasopharyngeal|C0027442|1|0.106|C0027442|CHV;HL7V2.5;SNOMEDCT|1|0.0473|1  
NP|nasopharynx|C0027442;C1268975|1|0.004|||1|0.01|1  
NP|natriuretic  
peptide|C1144709;C2709270|1|0.002|C1144709;C2709270|CHV;LNC;MTH;NDFRT|1|0.0437|1  
NP|near point|C0429572|||||1|  
NP|neck pressure|||||1|0.0095|  
NP|necrotizing pancreatitis|C0267941|||C0267941|CHV;CST;SNOMEDCT|1|0.0089|1  
NP|negative priming|||||1|0.0136|  
NP|neonatal-perinatal|||||1|  
NP|neopterin|C0068527;C0202143|||C0068527;C0202143|CHV;LNC;MSH;NCI;NDFRT;SNOMEDCT|1|0.0106|  
NP|nepal|C0027689|||C0027689|CHV|||  
NP|nepals|||C0027689|CHV|||  
NP|neper|C1553004|||||1|  
NP|nephrographic phase|||||1|  
NP|neptunium|C0027734|||||1|  
NP|nerve palsy|C0262576|||||1|  
NP|neuritic plaque|C0333463|||C0333463|CHV;CSP;MSH|1|0.0065|1  
NP|neuropathic pain|C0027796|||||1|0.0065|1  
NP|neuropathology|C0876934;C1540677;C1555824|||||1|  
NP|neuropeptide|C0027895|||C0027895|CHV;CSP;MSH;NCI;NDFRT|||1  
NP|neurophysin|C0027900|||C0027900|CSP;FMA;LNC;SNOMEDCT;UWDA|1|0.0236|1  
NP|neuropoietin|C1824810|||C1824810|HUGO|||  
NP|neuropsychiatric|||||1|0.0189|1  
NP|neuropsychiatry|C0870956|||||1|  
NP|neuropsychological|||||1|0.0573|  
NP|neutrogenic precautions|||||1|  
NP|new patient|||||1|  
NP|newly presented|||||1|  
NP|nifedipine|C0028066|||C0028066|AOD;CHV;CSP;LCH;LNC;MSH;MTHSPL;NCI;NDFRT;RXNORM;SNOMEDCT;USPMG;VANDF|1|0.0059|  
NP|nitrogen-phosphorus|||||1|  
NP|nitrophenol|C0028187|||||1|  
NP|nitroprusside|C0028193|||C0028193|AOD;CHV;CSP;LNC;MSH;NCI;NDFRT;RXNORM;SNOMEDCT;USPMG|||  
NP|nitrosopiperidine|C0068235|||C0068235|MSH|||  
NP|no pain|C0234225|||||1|

NP|no past history of||||C0332124|CHV|||  
NP|no phone|||||||1  
NP|no progress|||||||1  
NP|no progression|||||||1  
NP|nodular paraganuloma|||||||1  
NP|non-pregnant|||||1|0.0148|  
NP|nonpalpable|||||||1  
NP|nonpathologic|||||||1  
NP|nonpaying|||||||1  
NP|nonphagocytic|||||||1  
NP|nonpracticing|||||||1  
NP|nonpregnant|||||1|0.0337|  
NP|nonproducer|||||||1  
NP|nonylphenol|C0068946|||C0068946|CHV;MSH|1|0.0797|  
NP|normal|C0205307;C0439166;C2347086|||||1|0.0077|  
NP|normal plasma|C0440742|||C0440742|CHV;SNOMEDCT|1|0.0047|1  
NP|normal pregnancy|C0232989|||||1|0.0065|  
NP|normal pregnant|||||1|0.0053|  
NP|normal pregnant women|||||1|0.0035|  
NP|normal pressure|||||||1  
NP|normal prostate|||||1|0.0047|  
NP|normal protein|C0860902|||C0860902|CHV|||  
NP|normal-phase|||||1|0.0142|  
NP|norpropoxyphene|C0069020|||C0069020|CHV;LNC;MSH;SNOMEDCT|||  
NP|nosocomial pneumonia|C0949083|||C0949083|CHV;SNOMEDCT|1|0.0307|1  
NP|not palpable|||||||1  
NP|not perceptible|||||||1  
NP|not performed|||||||1  
NP|not practiced|||||||1  
NP|not pregnant|C0232973;C2826362|||||||1  
NP|not present|||||||1  
NP|not protected|||||||1  
NP|not provided|||||||1  
NP|noun phrase|||||1|0.0077|  
NP|nuclear pharmacy|C1556041|||||||1  
NP|nuclear protein|C0028589;C0949374|||C0028589;C0949374|CHV;CSP;MSH;MTH;NCI|||  
NP|nucleocapsid|C0178774;C1167518|||C0178774;C1167518|CSP;GO;MSH;MTH|1|0.023|  
NP|nucleocapsid protein|C0524816|||C0524816|MSH;NCI;NDFRT|1|0.0478|  
NP|nucleoplasmic|||||||1  
NP|nucleoprotein|C0028612|||C0028612|CHV;CSP;MSH;NDFRT;SNOMEDCT|||1  
NP|nucleoproteins|C0028612|||||1|0.0071|  
NP|nucleoside  
phosphorylase|C0133234;C1417772|||C0133234;C1417772|CSP;MSH;MTH;OMIM|1|0.0195|1  
NP|nucleotide pair|||||1|0.0112|1  
NP|nucleotide position|||||1|0.0224|  
NP|nucleus pulposus|C1185714|||C1185714|CHV;FMA;UWDA|1|0.0337|  
NP|nurse  
practitioner|C0028657|1|0.876|C0028657;C1549435;C1549986;C1618092|AOD;CHV;CSP;HL  
7V2.5;HL7V3.0;LNC;MSH;MTH;NCI;SNOMEDCT|1|0.0898|  
NP|nurse practitioners|C0028657|||C0028657|CHV|||  
NP|nursed poorly|||||||1  
NP|nursing practice|||||||1  
NP|nursing procedure|C0204636|||||||1  
NP|p-nonylphenol|||||1|0.0171|  
NP|patients|C0030705|||||1|0.0059|  
NP|proper name|||||||1

NP|purine nucleoside  
phosphorylase|C0034135;C1417772|||C0034135;C1417772|CHV;CSP;HUGO|||  
NP|purine nucleoside phosphorylases|C0034135|||C0034135|AOD|||  
NP|sodium nitroprusside|C0037533|||1|0.0555|  
NP|zinc finger protein 384|C1420834|||C1420834|HUGO|||  
NSAID|AIANS|||C0003211|MSH|||  
NSAID|ANTI INFLAMM AGENTS NONSTEROIDAL|||C0003211|MSH|||  
NSAID|ANTIINFLAMM AGENTS NON STEROIDAL|||C0003211|MSH|||  
NSAID|ANTIINFLAMMATORY AGENTS NONSTEROIDAL|||C0003211|MSH|||  
NSAID|Agents, Non-Steroidal Anti-Inflammatory|C0003211|||C0003211|MSH|||  
NSAID|Agents, Nonsteroidal Anti-Inflammatory|C0003211|||C0003211|MSH|||  
NSAID|Agents, Nonsteroidal Antiinflammatory|C0003211|||C0003211|MSH|||  
NSAID|Anti Inflammatory Agents, Non Steroidal|C0003211|||C0003211|MSH|||  
NSAID|Anti Inflammatory Agents, Nonsteroidal|C0003211|||C0003211|MSH|||  
NSAID|Anti-Inflammatory Agents, Non-Steroidal|C0003211|||C0003211|MSH|||  
NSAID|Anti-Inflammatory Agents, Nonsteroidal|C0003211|||C0003211|MSH|||  
NSAID|Antiinflammatory Agents, Non Steroidal|C0003211|||C0003211|MSH|||  
NSAID|Antiinflammatory Agents, Nonsteroidal|C0003211|||C0003211|MSH|||  
NSAID|NON STEROIDAL ANTI INFLAMM AGENTS|||C0003211|MSH|||  
NSAID|NONSTEROIDAL ANTIINFLAMMATORY AGENTS|C0003211|||C0003211|MSH|||  
NSAID|NSAIA|||C0003211|MSH|||  
NSAID|NSAID|C0003211|||C0003211|AOD;MSH;NCI;NDFRT;SNOMEDCT|||  
NSAID|NSAID - Non-steroidal anti-inflammatory  
drug|C0003211|||C0003211|SNOMEDCT|||  
NSAID|NSAIDS|C0003211|||C0003211|CSP|||  
NSAID|NSAIDS|C0003211|||C0003211|MSH;NCI|||  
NSAID|Non Steroidal Anti Inflammatory Agents|C0003211|||C0003211|MSH|||  
NSAID|Non-Steroidal Anti-Inflammatory Agents|C0003211|||C0003211|MSH|||  
NSAID|Non-steroidal Anti-inflammatory Agent|C0003211|||C0003211|NDFRT|||  
NSAID|Non-steroidal Anti-inflammatory Drug|C0003211|||C0003211|NDFRT|||  
NSAID|Non-steroidal Antiinflammatory Agent|C0003211|||C0003211|NDFRT|||  
NSAID|Non-steroidal Antiinflammatory Drug|C0003211|||C0003211|NDFRT|||  
NSAID|Non-steroidal anti-inflammatory agent|C0003211|||C0003211|SNOMEDCT|||  
NSAID|Non-steroidal anti-inflammatory agent (product)|||C0003211|SNOMEDCT|||  
NSAID|Non-steroidal anti-inflammatory agent (substance)|||C0003211|SNOMEDCT|||  
NSAID|Non-steroidal anti-inflammatory agent, NOS|C0003211|||C0003211|SNOMEDCT|||  
NSAID|Non-steroidal anti-inflammatory drug|C0003211|||C0003211|SNOMEDCT|||  
NSAID|Non-steroidal anti-inflammatory drug (substance)|||C0003211|SNOMEDCT|||  
NSAID|Non-steroidal anti-inflammatory product|||C0003211|SNOMEDCT|||  
NSAID|Non-steroidal anti-inflammatory product  
(substance)|||C0003211|SNOMEDCT|||  
NSAID|Nonsteroidal Anti Inflammatory Agents|C0003211|||C0003211|MSH|||  
NSAID|Nonsteroidal Anti-Inflammatory Agents|C0003211|||C0003211|MSH|||  
NSAID|Nonsteroidal Anti-inflammatory Agent|C0003211|||C0003211|NDFRT|||  
NSAID|Nonsteroidal Anti-inflammatory Drug|C0003211|||C0003211|NDFRT|||  
NSAID|Nonsteroidal Anti-inflammatory Drug [EPC]|C0003211|||C0003211|NDFRT|||  
NSAID|Nonsteroidal Antiinflammatory Drugs|C0003211|||C0003211|USPMG|||  
NSAID|Nonsteroidal Antiinflammatory Agent|C0003211|||C0003211|NDFRT|||  
NSAID|Nonsteroidal Antiinflammatory Agents|C0003211|||C0003211|MSH|||  
NSAID|Nonsteroidal Antiinflammatory Drug|C0003211|||C0003211|NCI;NDFRT|||  
NSAID|non-steroidal anti-inflammatory|||1|0.0059|  
NSAID|non-steroidal anti-inflammatory agent|C0003211|||1|0.0119|  
NSAID|non-steroidal anti-inflammatory drug|C0003211|||1|0.3375|  
NSAID|non-steroidal antiinflammatory drugs|||1|0.025|  
NSAID|nonsteroidal anti-inflammatory drug|C0003211|||C0003211|NCI|1|0.3711|  
NSAID|nonsteroidal anti-inflammatory drugs|C0003211|||C0003211|AOD|||  
NSAID|nonsteroidal anti-inflammatory drugs (NSAIDs)|C0003211|||C0003211|CHV|||

NSAID|nonsteroidal antiinflammatory agent|C0003211|||C0003211|CSP|||  
NSAID|nonsteroidal antiinflammatory drug|C0003211|1|1.000|C0003211|NCI;NDFRT|||1  
NSAID|nonsteroidal antiinflammatory drugs|C0003211|||1|0.2485|  
NSAID|nsaid|C0003211|||C0003211|CHV|||  
NSAID|nsaids|C0003211|||C0003211|CHV|||  
NST|Nonsense Syllable Test|||1  
NST|Nutrition Support Team|||1|0.027|  
NST|neospinothalamic|||1  
NST|neostigmine test|||1  
NST|nerve sheath tumor|C0206727|||C0206727|CHV;NCI;SNOMEDCT|||  
NST|nerve stimulation therapy|||1  
NST|neurostructural integration technique|||1  
NST|no specific type|||1  
NST|nocistatin|C0672514;C1418716|||C0672514;C1418716|HUGO;MSH;MTH|1|0.0202|  
NST|non-shivering thermogenesis|||1|0.0427|  
NST|non-stress test|C1314734|||1|0.0831|  
NST|nondirective supportive therapy|||1|0.0135|  
NST|nonmyeloablative stem cell transplant|||1  
NST|nonshivering thermogenesis|||1|0.1596|1  
NST|nonstress test|C1314734|1|0.996|C1314734|CHV;SNOMEDCT|1|0.1978|1  
NST|nonstress testing|C1314734|||C1314734|CHV|1|0.0202|  
NST|normal sphincter tone|||1  
NST|not sooner than|||1  
NST|nucleus of the solitary tract|C0175518|||C0175518|MSH;NCI|1|0.3191|  
NST|nutritional status type|||1  
NST|nutritional support technologist||1|0.002|||1  
NST|stem cell transplantation|C1504389|||1|0.1169|  
NSVD|NSVD|C2986704|||C2986704|NCI|||  
NSVD|Normal Delivery|C0269694;C1384485;C2986704|||C2986704|NCI|||  
NSVD|Normal Spontaneous Vaginal Delivery|C2986704|||C2986704|NCI|||  
NSVD|nonstructural valve deterioration|||1  
NSVD|normal spontaneous vaginal delivery|C2986704|1|1.000|C2986704|NCI|||1  
NTD|Defect, Neural Tube|C0027794|||C0027794|MSH|||  
NTD|Defects, Neural Tube|C0027794|||C0027794|MSH|||  
NTD|Developmental Defects, Neural Tube|C0027794|||C0027794|MSH;NDFRT|||  
NTD|Developmental Neural Tube Defects|C0027794|||C0027794|MSH;NDFRT|||  
NTD|N-terminal domain|||1|0.1069|  
NTD|NEURAL TUBE DEFECTS|C0027794|||C0027794|OMIM|||  
NTD|NTD|C0027794|||C0027794|NCI;OMIM|||  
NTD|NTD - Neural tube defect|C0027794|||C0027794|SNOMEDCT|||  
NTD|NTD Laboratories, Inc||1|0.988|||1  
NTD|Neural Tube Defect|C0027794|||C0027794|MSH;NCI|||  
NTD|Neural Tube Defects|C0027794|||C0027794|MEDLINEPLUS;MSH;MTH;NDFRT|||  
NTD|Neural Tube Defects [Disease/Finding]|||C0027794|NDFRT|||  
NTD|Neural Tube Developmental Defects|C0027794|||C0027794|MSH;NDFRT|||  
NTD|Neural tube defect|C0027794|||C0027794|LNC;SNOMEDCT|||  
NTD|Neural tube defect (disorder)|||C0027794|SNOMEDCT|||  
NTD|Normalized Total Dose|||1|0.0285|  
NTD|Spinal Dysraphism|C0027794;C0080178|||C0027794|NCI|||  
NTD|defect neural tube|C0027794|||C0027794|CHV|||  
NTD|defects neural tube|C0027794|||C0027794|CHV|||  
NTD|negative to date||1|0.010|||1  
NTD|neural tube defect|C0027794|1|0.002|C0027794|CHV;CSP;LNC;MSH;NCI;SNOMEDCT|||1  
NTD|neural tube defects|C0027794|||C0027794|CHV|1|0.8646|  
NTD|nitrendipine|C0028127|||C0028127|AOD;CHV;CSP;LCH;MSH;NCI;NDFRT;RXNORM;SNOMEDCT|||

NTD|nitroblue tetrazolium dye|||||1  
NTD|noise tone difference|||||1  
NTD|tube neural defects|C0027794|||C0027794|CHV|||  
OB|CAD11|C1413269|||C1413269|HUGO|||  
OB|CADHERIN 11|C0297505;C1413269|||C1413269|OMIM|||  
OB|CADHERIN, OSTEOBLAST|C0297505;C1413269|||C1413269|OMIM|||  
OB|CDH11|C1413269|||C1413269|HUGO;OMIM|||  
OB|CDH11 gene|C1413269|||C1413269|HUGO;MTH|||  
OB|CDHOB|C1413269|||C1413269|OMIM|||  
OB|Discipline of obstetrics|C0028773|||C0028773|MTH|||  
OB|FLJ94114|C2986870|||C2986870|NCI|||  
OB|LEP|||C1416825|HUGO;NCI;OMIM|||  
OB|LEP Gene|C1416825|||C1416825|NCI|||  
OB|LEP gene|C1416825|||C1416825|HUGO;MTH|||  
OB|LEP wt Allele|C2986870|||C2986870|MTH;NCI|||  
OB|LEPTIN|C0299583;C1295176;C1416825|||C1416825|OMIM|||  
OB|Leptin (Murine Obesity Homolog) Gene|||C1416825|NCI|||  
OB|Leptin (Murine Obesity Homolog) wt Allele|||C2986870|NCI|||  
OB|Maternity care|C0028773;C0374764|||C0028773|SNOMEDCT|||  
OB|OB|C0028773;C1413269;C1416825;C2986870|||C0028773;C1413269;C1416825;C2986870|HUGO;LNC;NCI;OMIM|||  
OB|OB-CADHERIN|C0297505;C1413269|||C1413269|OMIM|||  
OB|OB-Cadherin|C0297505;C1413269|||C1413269|HUGO|||  
OB|OBESE, MOUSE, HOMOLOG OF|||C1416825|OMIM|||  
OB|OBESITY, MORBID, WITH HYPOGONADISM|||C1416825|OMIM|||  
OB|OBESITY, SEVERE, DUE TO LEPTIN DEFICIENCY|||C1416825|OMIM|||  
OB|OBS|C2986870|||C2986870|NCI|||  
OB|Obese, Mouse, Homolog of Gene|||C2986870|NCI|||  
OB|Obstetrical|C0028773;C0205484|||C0028773|NCI|||  
OB|Obstetrics|C0028773|||C0028773|LCH;LNC;MSH;NCI;SNOMEDCT|||  
OB|Obstetrics (qualifier value)|||C0028773|SNOMEDCT|||  
OB|Olfactory bulbectomy|||||1|0.0123|  
OB|Oligoclonal bands|C0069426|||||1|0.0283|  
OB|Otilonium bromide|C0134250|||||1|0.0098|  
OB|cadherin 11, type 2, OB-cadherin (osteoblast)|||C1413269|HUGO|||  
OB|estradiol benzoate|C0167626|||C0167626|CHV;LCH;MSH;NCI;SNOMEDCT|||  
OB|field of maternity care|C0028773|||C0028773|CHV|||  
OB|leptin|C0299583;C1295176;C1416825|||C1416825|HUGO|1|0.0332|  
OB|obese|C0028754|||C0028754|CHV;DXP;SNOMEDCT|||1  
OB|obese gene|||||1|0.0209|  
OB|obesity|C0028754;C1963185|||C0028754;C1963185|AOD;CCS;CHV;COSTAR;CSP;CST;DXP;LCH;MEDLINEPLUS;MSH;MTH;NCI;NDFRT;OMIM;PDQ;QMR;SNOMEDCT|||1  
OB|objective benefit|||||1  
OB|obliterative bronchiolitis|C0006272|||C0006272|CHV;DXP;SNOMEDCT|1|0.1597|1  
OB|obstetric|C0205484|1|1.000|C0205484|LNC|||1  
OB|obstetrician|C0334897|||C0334897|CHV;MTH;SNOMEDCT|||  
OB|obstetrics|C0028773|||C0028773;C0334897;C0700061;C1549402|CHV;CSP;HL7V2.5;HL7V3.0;LCH;LNC;MSH;NCI;SNOMEDCT|||1  
OB|occlusion bodies|||||1|0.0098|  
OB|occult bacteremia|||||1  
OB|occult bleeding|C0333282|||C0333282|CHV;SNOMEDCT|||1  
OB|occult blood|C0028792;C2698644|||C0028792;C2698644|CHV;MSH;MTHICD9;NCI|||1  
OB|oestradiol benzoate|C0167626|||||1|0.0811|  
OB|olfactory  
bulb|C0028936;C1281094|||C0028936;C1281094|AOD;CHV;CSP;FMA;MSH;NCI;SNOMEDCT|1|0.4484|1  
OB|olfactory bulbectomized|||||1|0.027|

OB|oligoclonal IgG bands|||||1|0.0111|  
OB|oligoclonal band|C0069426|||C0069426|CHV;SNOMEDCT|||1  
OB|open biopsy|C0184922|||||1  
OB|osteoblast|C0029418|||C0029418|AOD;CHV;CSP;FMA;MSH;NCI;SNOMEDCT;UWDA|||1  
OB|osteoblast-enriched|||||1|0.0209|  
OB|osteoblast-like|||||1|0.016|  
OB|osteoblastic|||||1|0.0147|  
OB|osteoblastoma|C0029417|||||1  
OB|osteoblasts|C0029418|||||1|0.0713|  
OB|otilonium bromide|C0134250|||C0134250|CHV;MSH;NCI;RXNORM|||  
OB|oxidative burst|C0085416|||C0085416|CHV;GO;MSH;NCI|1|0.0246|  
OB|product of the obesity|||||1|0.0111|  
OCD|Anancastic neurosis|C0028768|||C0028768|MTHICD9;SNOMEDCT|||  
OCD|Anankastic Personalities|C0028768|||C0028768|MSH|||  
OCD|Anankastic Personality|C0009595;C0028768|||C0028768|MSH;NDFRT|||  
OCD|Anankastic neurosis|C0028768|||C0028768|SNOMEDCT|||  
OCD|Disorder, Obsessive-Compulsive|C0028768|||C0028768|MSH|||  
OCD|Disorders, Obsessive-Compulsive|C0028768|||C0028768|MSH|||  
OCD|Dissecans, Osteochondritis|C0029421|||C0029421|MSH|||  
OCD|Idiopathic avascular necrosis|C0029421|||C0029421|SNOMEDCT|||  
OCD|NEUROSI, OBSESSIVE COMPULSIVE|C0028768|||C0028768|DXP|||  
OCD|Neuroses, Obsessive-Compulsive|C0028768|||C0028768|MSH|||  
OCD|Neurosis, Obsessive Compulsive|C0028768|||C0028768|MSH|||  
OCD|Neurosis, Obsessive-Compulsive|C0028768|||C0028768|MSH;NDFRT|||  
OCD|OBSESSIVE COMPULSIVE DIS|||C0028768|MSH|||  
OCD|OBSESSIVE COMPULSIVE DISORDER|C0028768|||C0028768|COSTAR|||  
OCD|OBSESSIVE COMPULSIVE NEUROSI|C0028768|||C0028768|RAM|||  
OCD|OBSESSIVE-COMPULSIVE DISORDER|C0028768|||C0028768|OMIM|||  
OCD|OBSESSIVE-COMPULSIVE NEUROSI|C0028768|||C0028768|DXP;QMR|||  
OCD|OBSESSIVE-COMPULSIVE REACTION|C0028768|||C0028768|CST|||  
OCD|OCC|||C0029421|SNOMEDCT|||  
OCD|OCD|C0028768;C0029421|||C0028768;C0029421|CHV;CSP;MEDLINEPLUS;NCI;OMIM;SNOME  
DCT|||  
OCD|OCD - Obsessive-compulsive disorder|C0028768|||C0028768|SNOMEDCT|||  
OCD|OCD - Osteochondritis dissecans|C0029421|||C0029421|SNOMEDCT|||  
OCD|OD|C0029421;C0439164;C1512019|||C0029421|OMIM|||  
OCD|OD - Osteochondritis dissecans|C0029421|||C0029421|SNOMEDCT|||  
OCD|OSTEOCHONDRITIS DESSICANS|C0029421|||C0029421|COSTAR|||  
OCD|OSTEOCHONDRITIS DISSECANS|C0029421|||C0029421|DXP|||  
OCD|OSTEOCHONDRITIS DISSECANS, SHORT STATURE, AND EARLY-ONSET  
OSTEOARTHRITIS|||C0029421|OMIM|||  
OCD|Obsessive Compulsive Disorder|C0028768|||C0028768|MSH;NCI|||  
OCD|Obsessive Compulsive Neurosis|C0028768|||C0028768|COSTAR|||  
OCD|Obsessive compulsive disorder|C0028768|||C0028768|LNC;OMIM;SNOMEDCT|||  
OCD|Obsessive compulsive disorder (disorder)|||C0028768|SNOMEDCT|||  
OCD|Obsessive compulsive disorder, NOS|C0028768|||C0028768|SNOMEDCT|||  
OCD|Obsessive compulsive neurosis|C0028768|||C0028768|SNOMEDCT|||  
OCD|Obsessive-Compulsive  
Disorder|C0028768|||C0028768|MEDLINEPLUS;MSH;MTH;NDFRT|||  
OCD|Obsessive-Compulsive Disorder [Disease/Finding]|||C0028768|NDFRT|||  
OCD|Obsessive-Compulsive Disorders|C0028768|||C0028768|MSH|||  
OCD|Obsessive-Compulsive Neuroses|C0028768|||C0028768|MSH|||  
OCD|Obsessive-Compulsive Neurosis|C0028768|||C0028768|MSH|||  
OCD|Obsessive-compulsive dis|||C0028768|ICD9CM|||  
OCD|Obsessive-compulsive disorder|C0028768|||C0028768|OMIM;SNOMEDCT|||  
OCD|Obsessive-compulsive disorder (disorder)|||C0028768|SNOMEDCT|||  
OCD|Obsessive-compulsive disorder NOS|C0028768|||C0028768|SNOMEDCT|||

OCD|Obsessive-compulsive disorder NOS (disorder)||||C0028768|SNOMEDCT|||  
OCD|Obsessive-compulsive disorders|C0028768|||C0028768|ICD9CM|||  
OCD|Obsessive-compulsive neurosis|C0028768|||C0028768|LCH|||  
OCD|Osteochondrit dissecans|||C0029421|ICD9CM|||  
OCD|Osteochondritis Dissecans|C0029421|||C0029421|MSH;MTH;NCI;NDFRT|||  
OCD|Osteochondritis Dissecans [Disease/Finding]|||C0029421|NDFRT|||  
OCD|Osteochondritis dissecans|C0029421|||C0029421|ICD9CM;SNOMEDCT|1|0.0352|  
OCD|Osteochondritis dissecans (disorder)|||C0029421|SNOMEDCT|||  
OCD|Osteochondrosis dessicans|C0029421|||C0029421|SNOMEDCT|||  
OCD|Osteochondrosis dissecans|C0029421|||C0029421|SNOMEDCT|||  
OCD|Personalities, Anankastic|C0028768|||C0028768|MSH|||  
OCD|Personality, Anankastic|C0009595;C0028768|||C0028768|MSH|||  
OCD|REACTION OBSESSIVE-COMPULSIVE|||C0028768|CST|||  
OCD|[X]Obsessive-compulsive disorder, unspecified|||C0028768|SNOMEDCT|||  
OCD|[X]Obsessive-compulsive disorder, unspecified  
(disorder)|||C0028768|SNOMEDCT|||  
OCD|anankastic neurosis|C0028768|||C0028768|AOD|||  
OCD|idiopathic avascular necrosis|C0029421|||C0029421|CHV|||  
OCD|obsessive compulsive  
disorder|C0028768|||C0028768|CHV;COSTAR;CSP;LNC;MSH;NCI;OMIM;SNOMEDCT|||  
OCD|obsessive compulsive disorder (OCD)|C0028768|||C0028768|CHV|||  
OCD|obsessive compulsive neurosis|C0028768|||C0028768|CHV|||  
OCD|obsessive-compulsive|||1|0.0068|  
OCD|obsessive-compulsive disorder|C0028768|1|0.952|C0028768|AOD;CHV;NCI|1|0.94|1  
OCD|obsessive-compulsive disorders|C0028768|||C0028768|CHV|||  
OCD|obsessive-compulsive neurosis|C0028768|||C0028768|CHV|||  
OCD|obsessive-compulsive psychoneurosis or reaction|||C0028768|AOD|||  
OCD|occupational contact dermatitis|||1|0.0093|  
OCD|organ-confined disease|||1|0.0031|  
OCD|osteochondral defect|||1|  
OCD|osteochondritis  
dissecans|C0029421|1|0.048|C0029421|CHV;DXP;ICD9CM;MSH;MTH;NCI;NDFRT;SNOMEDCT|||  
1  
OCD|osteochondrosis dissecans|C0029421|||C0029421|SNOMEDCT|||  
OCD|ovarian cholesterol depletion|||1|  
OCD|oxygen cost diagram|||1|0.0056|  
ODT|Oculodynamic Test|||1|1|  
ODT|oculodynamic test|||1|  
ODT|optical Doppler tomography|||1|  
ODT|orally disintegrating tablet||1|1.000|||1|  
ODT|right occiput transverse|||1|  
OFC|CLEFT LIP WITH OR WITHOUT CLEFT PALATE, NONSYNDROMIC, 1|||C1861537|OMIM|||  
OFC|CLEFT LIP/PALATE, NONSYNDROMIC|||C1861537|OMIM|||  
OFC|OFC|C1861537|||C1861537|OMIM|||  
OFC|OFC1|C1417940;C1861537|||C1861537|OMIM|||  
OFC|OROFACIAL CLEFT 1|C1417940;C1861537|||C1861537|MTH;OMIM|||  
OFC|OROFACIAL CLEFT, NONSYNDROMIC|C1861537|||C1861537|OMIM|||  
OFC|head circumference|C0262499|||1|0.1111|  
OFC|occipital-frontal circumference|C0262499|1|1.000|||1|  
OFC|occipitofrontal circumference|||1|0.127|  
OFC|office|C0442603|||1|  
OFC|open food challenge|||1|  
OFC|oral food challenge|||1|  
OFC|orbitofacial cleft|||1|  
OFC|orbitofrontal cortex|C2331062|||1|0.7619|  
OFC|osteitis fibrosa  
cystica|C0029405|||C0029405|CHV;DXP;MSH;MTH;NCI;NDFRT;SNOMEDCT|||1|

OKT3|Anti-CD3 Monoclonal Antibody OKT3|C0085379|||C0085379|NCI|||  
OKT3|Anti-CD3 monoclonal antibody OKT 3|C0085379|||C0085379|PDQ|||  
OKT3|Anti-CD3 monoclonal antibody OKT3|C0085379|||C0085379|PDQ|||  
OKT3|MOAB OKT 3|C0085379|||C0085379|PDQ|||  
OKT3|MOAB OKT3|C0085379|||C0085379|PDQ|||  
OKT3|MURMONAB-CD3|C0085379|||C0085379|NCI;NDFRT;VANDF|||  
OKT3|MoAb OKT3|C0085379|||C0085379|NCI|||  
OKT3|Monoclonal Antibody OKT3|C0085379|||C0085379|MSH;NCI;NDFRT|||  
OKT3|Muromonab CD3|C0085379|||C0085379|MSH|||  
OKT3|Muromonab-  
CD3|C0085379|||C0085379|MSH;MTH;NCI;NDFRT;RXNORM;SNOMEDCT;USPMG|||  
OKT3|Muromonab-CD3 (product)|||C0085379|SNOMEDCT|||  
OKT3|Muromonab-CD3 (substance)|||C0085379|SNOMEDCT|||  
OKT3|Muromonab-CD3 Monoclonal Antibody|C0085379|||C0085379|PDQ|||  
OKT3|Muromonab-CD3 [Chemical/Ingredient]|||C0085379|NDFRT|||  
OKT3|OKT3|C0085379|||C0085379|LNC;MSH;NDFRT;PDQ|||  
OKT3|anti-CD3 antibodies|||1|0.1667|  
OKT3|anti-CD3 monoclonal antibody|||1|0.3095|  
OKT3|monoclonal antibody OKT 3|C0085379|||C0085379|PDQ|||  
OKT3|monoclonal antibody OKT3|C0085379|||C0085379|PDQ|||  
OKT3|murine monoclonal anti-CD3 antibody|||1|0.1667|  
OKT3|muromonab cd3|C0085379|||C0085379|CHV|||  
OKT3|muromonab-CD3|C0085379|||C0085379|MTHSPL|1|0.3571|  
OKT3|muromonab-CD3 monoclonal antibody|C0085379|||C0085379|NCI|||  
OKT3|muromonab-cd3|C0085379|||C0085379|CHV|||  
OKT3|okt3|C0085379|||C0085379|CHV|||  
OKT3|orthoclone OKT3/Muromonab-CD3||1|1.000|||  
OM|obtuse marginal 1||1|1.000|||  
OM|MU|C0347978|||C0028971|NCI|||  
OM|OM|C0028971;C1705272|||C0028971;C1705272|NCI|||  
OM|OMAN|C0028971|||C0028971|NCI|||  
OM|OMN|C0028971|||C0028971|NCI|||  
OM|Occupational medicine|C0028802|||1|0.0121|  
OM|Oman|C0028971|||C0028971|AOD;LCH;MSH;MTH;NCI;SNOMEDCT|||  
OM|Oman (geographic location)|||C0028971|SNOMEDCT|||  
OM|Oncostatin M|C0069535;C1149423;C1335093|||1|0.0836|  
OM|Oral mucositis|C0038362;C1568868|||1|0.0189|  
OM|Organ Measurement Domain|C1705272|||C1705272|MTH;NCI|||  
OM|Organ Measurements|C1705272|||C1705272|NCI|||  
OM|Osborn-Mendel|||1|  
OM|Osborne-Mendel|||1|0.035|  
OM|Ovum mutant|||1|0.0135|  
OM|every morning|C0585329|||1|  
OM|obtuse marginal||1|1.000|||  
OM|occipitomenal|||1|  
OM|occupational  
medicine|C0028802|||C0028802;C1552437;C1555855;C1555921|CHV;CSP;HL7V3.0;MSH;NCI;  
SNOMEDCT|||1|  
OM|ocular melanoma|C0558356|||1|  
OM|ocular movement|||1|  
OM|oculomotor|C0872237|||C0872237|CHV;CSP|||1|  
OM|olfactory mucosa|C0028937|||C0028937|CHV;LCH;MSH;NCI|1|0.0202|  
OM|oman|C0028971|||C0028971|CHV|||  
OM|omans|||C0028971|CHV|||  
OM|omental|C0028977|||C0028977|CHV;SNOMEDCT|||  
OM|omeprazole|C0028978|||C0028978|AOD;CHV;CSP;LNC;MSH;MTHSPL;NCI;NDFRT;PDQ;RXNOR  
M;SNOMEDCT;USPMG;VANDF|1|0.0229|

OM|oncomodulin|C0069534;C1417929|||C0069534;C1417929|HUGO;MSH;MTH;OMIM|1|0.0121|  
OM|oncostatin M|C0069535;C1149423;C1335093|||||1  
OM|operating microscope|C0181849|||||1  
OM|operative mortality|||||1|0.0323|  
OM|optical microscopy|C2984701|||C2984701|NCI|1|0.0323|  
OM|oral motor|||||1  
OM|oral mucosa|C0026639|||||1|0.0121|  
OM|oral  
mucositis|C0038362;C1568868|||C0038362;C1568868|CHV;MSH;MTH;NCI;SNOMEDCT|||1  
OM|orbitomeatal|||||1  
OM|organomegaly|||||1  
OM|osteomalacia|C0029442|||C0029442|AOD;CHV;COSTAR;CSP;CST;DXP;LCH;MSH;MTH;NCI;N  
DFRT;OMIM;QMR;SNOMEDCT|1|0.035|1  
OM|osteomyelitis|C0029443|||C0029443|AIR;AOD;CHV;COSTAR;CSP;CST;DXP;LCH;MEDLINEP  
LUS;MSH;MTH;NCI;NDFRT;OMIM;SNOMEDCT|1|0.027|1  
OM|osteopathic manipulation|C0949744|||C0949744|CHV;MSH;SNOMEDCT|||1  
OM|osteopathic manipulative|||||1  
OM|otitis  
media|C0029882;C2827407|||C0029882;C2827407|CHV;COSTAR;CSP;CST;DXP;LCH;MEDLINEPL  
US;MSH;MTH;NCI;NDFRT;OMIM;SNOMEDCT|1|0.2709|1  
OM|outer medulla|||||1|0.0337|  
OM|outer membrane|C1167331|||C1167331|CHV;GO|1|0.3073|1  
OM|ovomucoid|C0029960|||C0029960|CHV;CSP;LNC;MSH;NDFRT;SNOMEDCT|1|0.0162|  
OM|ovulation method|||||1|0.0148|1  
OM|oxygen mask|C0181744|||||1  
OM|oxymatrine|C0069821|||C0069821|CHV;MSH|||  
OP|1,10-phenanthroline|C0087870|||||1|0.0387|  
OP|4-Tert-octylphenol|C0537565|||||1|0.0464|  
OP|4-tert-octylphenol|C0537565|||C0537565|MSH|||  
OP|Organophosphorus pesticides|||||1|0.011|  
OP|mice homozygous for the osteopetrosis|||||1|0.0088|  
OP|o-phenanthroline|C0087870|||||1|0.011|  
OP|obesity-prone|||||1|0.0099|  
OP|oblique presentation|C0426058|||||1  
OP|oblique presentation/occiput posterior||1|0.242|||||  
OP|occipitoparietal|||||1  
OP|occiput posterior|C0856256|1|0.006|C0856256|CHV|||1  
OP|occupational physician|C0401976|||C0401976|CHV;SNOMEDCT|||  
OP|octylphenol|C1258354|||C1258354|MSH|||  
OP|old patient|||||1  
OP|olfactory peduncle|C2335775|||C2335775|FMA|||1  
OP|oligodendrocyte progenitor|||||1|0.0166|  
OP|opaque|C0029053;C1261286;C1882150|||C0029053;C1261286;C1882150|CHV;MTH;NCI;SN  
OMEDCT|||  
OP|open|C0175566|||||1  
OP|opening|C0175566;C1882151|||||1  
OP|opening pressure|||||1|0.0077|1  
OP|operation|C0543467|||C0543467;C1880161|CHV;MEDLINEPLUS;MTH;NCI;SNOMEDCT|||1  
OP|operative|C1882154|1|0.110|||||1  
OP|operative  
procedure|C0543467;C0677612|||C0543467;C0677612|CHV;MSH;SNOMEDCT|||1  
OP|ophthalmic||1|0.010|||||  
OP|ophthalmology|C0029087;C1555792|||C0029087;C1555792|CHV;HL7V3.0;LCH;LNC;MEDLI  
NEPLUS;MSH;NCI;SNOMEDCT|||1  
OP|opisthocranium|C2336409|||||1  
OP|opponens  
pollicis|C0224287;C1305008|||C0224287;C1305008|FMA;SNOMEDCT;UWDA|1|0.011|1

OP|oral and pharyngeal mucositis|||||||1  
OP|organizing pneumonia|C0264383|||C0264383|CHV|1|0.0188|  
OP|organophosphate|C0031701|||C0031701|CHV;NCI;SNOMEDCT|1|0.2829|  
OP|organophosphate pesticide|C0360429|||||1|0.0122|  
OP|organophosphorous|||||1|0.0254|1  
OP|organophosphorus|||||1|0.2376|  
OP|organophosphorus compound|C0029254|||C0029254|CHV;SNOMEDCT|||  
OP|organophosphorus compounds|C0029254|||||1|0.0221|  
OP|original package|||||||1  
OP|oropharyngeal|C0521367|||C0521367;C0553694;C1522409|CHV;CSP;CST;MTH;NCI;SNOME  
DCT|1|0.011|  
OP|oropharynx|C0521367;C1280659|1|0.616|||1|0.0099|1  
OP|ortho-phenanthroline|C0134184|||C0134184|MSH|||  
OP|orthostatic proteinuria|C0232867|||C0232867|CHV;MTHICD9;SNOMEDCT|||1  
OP|oscillatory potential|||||||1  
OP|oscillatory potentials|||||||1|0.053|  
OP|osmotic pressure|C0029393|||C0029393|AOD;CHV;CSP;MSH;SNOMEDCT|1|0.0088|1  
OP|osteopetrosis|C0029454|||C0029454|CHV;COSTAR;CSP;DXP;ICD9CM;LCH;MSH;NCI;NDFRT  
;SNOMEDCT|||  
OP|osteopetrotic|||||||1|0.0265|  
OP|osteopontin|C0069676;C1420369|||C0069676;C1420369|CHV;CSP;MSH;MTH;NCI;NDFRT;O  
MIM;SNOMEDCT|||  
OP|osteoporosis|C0029456|||C0029456;C1962963;C2678504;C2911643|AOD;CCS;CHV;COSTA  
R;CSP;CST;DXP;ICD9CM;ICPC;LCH;LNC;MEDLINEPLUS;MSH;MTH;NCI;NDFRT;OMIM;PDQ;QMR;SNO  
MEDCT|1|0.1061|1  
OP|osteoporotic|||||||1|0.0099|  
OP|other psychotic|||||||1  
OP|out-patient|C0029921|||C0029921|CHV;MSH|||  
OP|outpatient|C0029921;C1548439;C1549405|1|0.002|||1|0.0144|1  
OP|ova and parasites||1|0.002|||||  
OP|overpressure|||||||1  
OP|overproof|||||||1  
OP|ovine prolactin|||||||1  
ORIF|Open reduction and internal fixation|||||||1|1|  
ORIF|open reduction and internal fixation||1|1.000|||||1  
ORIF|open reduction internal fixation|C1297885|||C1297885|CHV|||  
ORIF|open reduction internal fixation (ORIF)|C1297885|||C0747060|CHV|||  
ORIF|orif|C0747060|||C0747060|CHV|||  
OR|(drug) OR||1|0.002|||||  
OR|NADPH-cytochrome P450 reductase|C0027310|||||1|0.0011|  
OR|OPERATING ROOM|C0029064;C1578465|||C0029064|NCI|||  
OR|OR|||C0029064;C0029195|NCI|||  
OR|OR - Operating room|||C0029064|SNOMEDCT|||  
OR|OT - Operating theatre|C0029064|||C0029064|SNOMEDCT|||  
OR|Ocular retardation|||||||1|0.0011|  
OR|Operating Room|C0029064;C1578465|||C0029064|MSH;MTH;NCI|||  
OR|Operating Rooms|C0029064|||C0029064|MSH|||  
OR|Operating Theater|C0029064|||C0029064|NCI|||  
OR|Operating Theatre|C0029064|||C0029064|NCI|||  
OR|Operating room|C0029064;C1578465|||C0029064|SNOMEDCT|||  
OR|Operating rooms|C0029064|||C0029064|LCH|||  
OR|Operating theatre|C0029064|||C0029064|SNOMEDCT|||  
OR|Operating theatre (environment)|||C0029064|SNOMEDCT|||  
OR|Opioid receptors|C0034801|||||1|0.0009|  
OR|Or|||C1518602;C1706533|NCI;SNOMEDCT|||  
OR|Or - dosing instruction fragment|||C1706533|MTH;SNOMEDCT|||  
OR|Or - dosing instruction fragment (qualifier value)|||C1706533|SNOMEDCT|||

OR|Oregon|C0029195|||C0029195|AOD;LCH;MSH;NCI;SNOMEDCT|||  
OR|Oregon (geographic location)|C0029195|||C0029195|MTH;SNOMEDCT|||  
OR|P450 oxidoreductase|||1|0.0011|  
OR|Room, Operating|C0029064;C1578465|||C0029064|MSH|||  
OR|Rooms, Operating|C0029064|||C0029064|MSH|||  
OR|objective response|||1|0.0085|  
OR|oblique ridge|||1|  
OR|odds ratio|C0028873|||C0028873|CHV;MSH;NCI|1|0.908|1  
OR|odds ration|||1|0.0018|  
OR|odorant receptor|C0164313|||C0164313|MSH;NDFRT|1|0.0037|  
OR|oestrogen receptor|C0034804;C1414461;C1521863|||1|0.0028|  
OR|oil retention|||1|  
OR|olfactory receptor|C1518565|||C1518565|AOD;CHV;CSP;FMA|1|0.0068|  
OR|open reduction|C0185373;C2370853|||1|  
OR|open repair|C0441613|||C0441613|CHV;SNOMEDCT|1|0.002|  
OR|operating  
room|C0029064;C1578465|1|0.932|C0029064;C1578465|CHV;CSP;HL7V2.5;MSH;MTH;NCI;SNO  
MEDCT|1|0.0418|1  
OR|operating rooms|C0029064|||C0029064|CHV|||  
OR|operating theater|C0029064|||C0029064|CHV|||  
OR|operating theaters|C0029064|||C0029064|CHV|||  
OR|operating theatre|C0029064|||C0029064|CHV|||  
OR|operating theatres|C0029064|||C0029064|CHV|||  
OR|operations research|C0029066|||C0029066|CSP;LCH;MSH|1|0.0016|1  
OR|opioid receptor|C0034801|||C0034801|CHV;CSP;MSH;MTH;NDFRT|||  
OR|optic radiation|C0228277;C1281308|||C0228277;C1281308|FMA;SNOMEDCT|||1  
OR|optical rotation|C0029141|||C0029141|CSP;LCH;MSH|1|0.0011|  
OR|or|||C1518602|HL7V3.0|||  
OR|or - article|||C1518602|MTH|||  
OR|oral rehydration|C0086904;C0309655|||C0086904;C0309655|CHV;MSH;SNOMEDCT|||1  
OR|orbicularis oris|C0224147;C1304957|||1|  
OR|oregon|C0029195|||C0029195|CHV|||  
OR|oregons|||C0029195|CHV|||  
OR|organ recovery|||1|  
OR|orienting reaction|||1|0.0007|  
OR|orienting reflex|||1|0.0016|1  
OR|orienting response|||1|0.0062|  
OR|orthopedic|C0029355|||1|  
OR|orthopedic research|||1|  
OR|ouabain-resistant|||1|0.0022|  
OR|outflow rate|||1|  
OR|outflow resistance|||1|0.0006|  
OR|ovary reserve|||1|  
OR|overrefraction|C1688601|||1|  
OR|ovulation rate|||1|0.0029|  
OR|own recognizance|||1|  
OR|oxidized-reduced|||1|  
OR|oxidoreductase|C0030016;C1537381|||C0030016;C1537381|CHV;CSP;HUGO;MTH;NCI;SNO  
MEDCT|||  
OR|relative risk|C0242492|||1|0.0007|  
OR|response rate|C0237629|||1|0.0019|  
OR|right operator|||1|0.0009|  
OR|room operating|||C0029064|CHV|||  
OS|BBBG1|C2697964;C2936904|||C2697964;C2936904|NCI;OMIM|||  
OS|BONE|C0262950;C0391978;C1266908;C1266909|||C0262950|NCI|||  
OS|Bone|C0262950;C0391978;C1266908;C1266909|||C0262950|FMA;HL7V2.5;LCH;LNC;NCI;U  
WDA|||

OS|Bone (organ)|C0262950|||C0262950|UWDA|||  
OS|Bone organ|C0262950|||C0262950|FMA|||  
OS|Bone structure|C0262950|||C0262950|SNOMEDCT|||  
OS|Bone structure (body structure)|||C0262950|SNOMEDCT|||  
OS|Bone, NOS|C0262950;C0391978;C1266908;C1266909|||C0262950|SNOMEDCT|||  
OS|Bones|C0262950;C1266909|||C0262950|FMA;LCH;LNC;MSH;UWDA|||  
OS|Bones set|||C0262950|FMA|||  
OS|Bones, NOS|C0262950;C1266909|||C0262950|SNOMEDCT|||  
OS|Circumoral region of face|C0230028|||C0230028|SNOMEDCT|||  
OS|FINGER ON X AND Y, MOUSE, HOMOLOG OF|||C1417167|OMIM|||  
OS|FXY|C1417167;C2697964|||C1417167;C2697964|HUGO;NCI;OMIM|||  
OS|G syndrome|C1801950;C2936904|||C2936904|SNOMEDCT|||  
OS|GBBB1|C2697964|||C2697964|NCI|||  
OS|GGGB1|C2936904|||C2936904|OMIM|||  
OS|HYPERTELORISM WITH ESOPHAGEAL ABNORMALITY AND HYPOSPADIAS|||C2936904|OMIM|||  
OS|HYPERTELORISM-HYPOSPADIAS SYNDROME|C1801950;C2936904|||C2936904|OMIM|||  
OS|Hypertelorism-hypospadias syndrome|C1801950;C2936904|||C2936904|SNOMEDCT|||  
OS|MID1|C1417167;C2986643|||C1417167|HUGO;NCI;OMIM|||  
OS|MID1 Gene|C1417167|||C1417167|NCI|||  
OS|MID1 gene|C1417167|||C1417167|HUGO;MTH|||  
OS|MID1 wt Allele|C2697964|||C2697964|MTH;NCI|||  
OS|MIDIN|C1417167;C2697964;C2698218|||C1417167;C2697964|NCI;OMIM|||  
OS|MIDLINE 1|C1417167;C2698218|||C1417167|OMIM|||  
OS|MIDLINE 1 RING FINGER GENE|C1417167|||C1417167|OMIM|||  
OS|Midline 1 (Opitz/BBB Syndrome) Gene|||C1417167|NCI|||  
OS|Midline 1 (Opitz/BBB Syndrome) wt Allele|||C2697964|NCI|||  
OS|Mouth|C0226896;C0230028;C1267547;C1278910|||C0230028|FMA;SNOMEDCT;UWDA|||  
OS|Mouth region|C0230028|||C0230028|SNOMEDCT|||  
OS|Mouth region structure|C0230028|||C0230028|SNOMEDCT|||  
OS|Mouth region structure (body structure)|||C0230028|SNOMEDCT|||  
OS|Mouth structure|C0230028|||C0230028|SNOMEDCT|||  
OS|OGS1|C2697964;C2936904|||C2697964;C2936904|NCI;OMIM|||  
OS|OPENING SNAP|C0232275|||C0232275|DXP|||  
OS|OPITZ BBBG SYNDROME, TYPE I|C2936904|||C2936904|OMIM|||  
OS|OPITZ GBBB SYNDROME, TYPE I|C2936904|||C2936904|OMIM|||  
OS|OPITZ GBBB SYNDROME, X-LINKED|C2936904|||C2936904|OMIM|||  
OS|OPITZ SYNDROME|C2936904|||C2936904|OMIM|||  
OS|OPITZ SYNDROME, X-LINKED|C2936904|||C2936904|OMIM|||  
OS|OPITZ-G SYNDROME, TYPE I|C2936904|||C2936904|OMIM|||  
OS|OS|C0029383;C0230028;C0262950;C1561953|||C0232275;C1417167;C1709324;C2697964;  
C2936904|HUGO;NCI;OMIM;SNOMEDCT|||  
OS|OS - Opening snap|C0232275|||C0232275|SNOMEDCT|||  
OS|OSMIUM|C0029383|||C0029383|NCI|||  
OS|OSX|C1424900;C2697964;C2936904|||C2697964;C2936904|NCI;OMIM|||  
OS|Ocimum sanctum|C1483721|||1|0.004|  
OS|Omenn syndrome|C1801959;C2700553|||1|0.0036|  
OS|One-Step|C0534010|||1|0.0052|  
OS|Opening snap|C0232275|||C0232275|MTH;SNOMEDCT|||  
OS|Opening snap (finding)|||C0232275|SNOMEDCT|||  
OS|Operating System|C1709324|||C1709324|MTH;NCI|||  
OS|Opitz syndrome|C2936904|||C2936904|SNOMEDCT|1|0.0032|  
OS|Opitz's (J.M.) syndrome|||C2936904|SNOMEDCT|||  
OS|Opitz-Frias syndrome|C1801950;C2936904|||C2936904|MTH;SNOMEDCT|||  
OS|Opitz-Frias syndrome (disorder)|||C2936904|SNOMEDCT|||  
OS|Oral part of face|C0230028|||C0230028|FMA;UWDA|||  
OS|Oral region|C0230028;C1995016|||C0230028|FMA;MTH|||  
OS|Oral region of face|C0230028|||C0230028|SNOMEDCT|||

OS|Os|C0029383;C0230028;C0262950;C1561953|||C0029383;C0230028;C0262950;C1561953|  
FMA;HL7V3.0;NCI;UWDA|||  
OS|Os - Osmium|C0029383|||C0029383|SNOMEDCT|||  
OS|Os element|C0029383|||C0029383|CSP|||  
OS|Osmium|C0029383|||C0029383|LCH;LNC;MSH;NCI;NDFRT;SNOMEDCT|||  
OS|Osmium (substance)|||C0029383|SNOMEDCT|||  
OS|Osmium Metallicum|C0029383|||C0029383|NCI|||  
OS|Osmium [Chemical/Ingredient]|||C0029383|NDFRT|||  
OS|Osmium, NOS|C0029383|||C0029383|SNOMEDCT|||  
OS|Ossa|C0262950|||C0262950|FMA|||  
OS|Osseous|C0262950;C0391978|||C0262950|NCI|||  
OS|Perioral region of face|C0230028|||C0230028|SNOMEDCT|||  
OS|RNF59|C1417167;C2697964|||C1417167;C2697964|HUGO;NCI|||  
OS|Regio oralis|C0230028|||C0230028|FMA|||  
OS|Set of bones|C0262950|||C0262950|FMA;UWDA|||  
OS|Skeletal bone|C0262950|||C0262950|MTH|||  
OS|Skeleton system|C0262950|||C0262950|FMA;UWDA|||  
OS|Structure of oral region of face|C0230028|||C0230028|SNOMEDCT|||  
OS|Structure of oral region of face (body structure)|||C0230028|SNOMEDCT|||  
OS|Supernumerary mandibular left central primary  
incisor|C1561953|||C1561953|MTH|||  
OS|Systema skeletale|C0262950|||C0262950|FMA|||  
OS|TELECANTHUS-HYPOSPADIAS SYNDROME|C1801950;C2936904|||C2936904|OMIM|||  
OS|TRIM18|C1417167;C2697964|||C1417167;C2697964|HUGO;NCI|||  
OS|XPRF|C2697964|||C2697964|NCI|||  
OS|ZNFXY|C2697964|||C2697964|NCI|||  
OS|bbb syndrome|C1801950;C2936904|||C2936904|CHV|||  
OS|bone|C0262950;C0391978;C1266908;C1266909|||C0262950|AOD;CHV;CSP|||  
OS|bone structure|C0262950|||C0262950|CHV|||  
OS|bone structures|C0262950|||C0262950|CHV|||  
OS|bones|C0262950;C1266909|||C0262950|CHV|||  
OS|bones structure|||C0262950|CHV|||  
OS|bones structures|||C0262950|CHV|||  
OS|core oligosaccharide|||1|0.004|  
OS|g syndrome|C1801950;C2936904|||C2936904|CHV|||  
OS|left eye|C0229090|1|0.998|||1|0.0056|1  
OS|midline 1 (Opitz/BBB syndrome)|||C1417167|HUGO|||  
OS|mouth region|C0230028|||C0230028|CHV|||  
OS|mouth structure|C0230028|||C0230028|CHV|||  
OS|mouth structures|||C0230028|CHV|||  
OS|occiput-sacrum|||1|  
OS|occupational safety|C0079921|||1|  
OS|oligosaccharide|C0028959|||C0028959|CHV;CSP;FMA;NCI;SNOMEDCT|||  
OS|oligosaccharides|C0028959|||1|0.0064|  
OS|oligospermic|||1|  
OS|oligosyndactylism|||1|0.0036|  
OS|open splenectomy|||1|0.0112|1  
OS|open surgery|C0348025|||C0348025|CHV;SNOMEDCT|1|0.0036|1  
OS|opening snap|C0232275|||C0232275|CHV|||1  
OS|opening snap (OS)|C0232275|||C0232275|CHV|||  
OS|ophthalmic solution|C0029083;C2984066|||1|  
OS|opitz fria syndrome|C2936904|||C2936904|CHV|||  
OS|opitz syndrome|C2936904|||C2936904|CHV|||  
OS|opitz syndromes|C2936904|||C2936904|CHV|||  
OS|opitz-frias syndrome|C1801950;C2936904|||C2936904|CHV|||  
OS|opposite-sex|||1|0.0036|  
OS|oral secretion|C1272568|||C1272568|CHV;SNOMEDCT|||

OS|oral surgery|C0038908;C0524861|||||1  
OS|orbitale superius|||||1  
OS|orthopedic surgery|C0029355;C0162439;C1136201;C1555794|||||1  
OS|os|C0029383;C0230028;C0262950;C1561953|||C0262950|CHV|||  
OS|osmium|C0029383|||C0029383|AOD;CHV;CSP|||1  
OS|osteogenic  
sarcoma|C0029463|||C0029463|CHV;COSTAR;CSP;DXP;MSH;NCI;OMIM;PDQ;SNOMEDCT|1|0.007  
2|1  
OS|osteoid surface|||||1  
OS|osteosarcoma|C0029463;C0585442;C2697383|||C0029463;C0585442;C2697383|AOD;CHV;  
COSTAR;CSP;DXP;MEDLINEPLUS;MSH;MTH;NCI;NDFRT;OMIM;PDQ;SNOMEDCT|1|0.0538|1  
OS|osteosclerosis|C0029464|||||1  
OS|ouabain sensitive|||||1  
OS|ouabain-sensitive|||||1|0.0076|  
OS|outer segments|||||1|0.0261|  
OS|ovarian stimulation|C0949385|||C0949385|CHV;MSH|||  
OS|overall survival|||||1  
OS|overall survival rate|C0038954|||C0038954|NCI|||  
OS|overlap syndrome|C0410000|||C0410000|CHV;SNOMEDCT|||  
OS|overshoot|||||1|0.0076|  
OS|oxidative  
stress|C0242606;C0696141|||C0242606;C0696141|AOD;CHV;CSP;MSH;MTH;NCI|1|0.0433|1  
OS|oxygen saturation|C0369768;C0483415|||||1  
OS|skeletal bone|C0262950|||C0262950|AOD;CHV|||  
OS|skeleton system|C0262950|||C0262950|CHV|||  
OS|structure bone|C0262950|||C0262950|CHV|||  
OS|survival|C0038952;C0220921|||||1|0.7858|  
OS|survival rate|C0038954|||||1|0.006|  
OS|survival time|C2919552|||||1|0.0044|  
OS|system|C0449913;C1553451;C1704459|||||1|0.004|  
OTC|Drugs, Non Prescription|C0013231|||C0013231|MSH|||  
OTC|Drugs, Non-Prescription|C0013231|||C0013231|MSH;MTH|||  
OTC|Drugs, Nonprescription|C0013231|||C0013231|LCH;MSH|||  
OTC|Drugs, OTC|C0013231|||C0013231|MSH|||  
OTC|Drugs, Over-the-Counter|C0013231|||C0013231|MSH|||  
OTC|L-2-oxothiazolidine-4-carboxylate|C0124869|||||1|0.0168|  
OTC|L-2-oxothiazolidine-4-carboxylic acid|||||1|0.0168|  
OTC|MED PATENT|||C0013231|MSH|||  
OTC|Medicines, Over-the-Counter|C0013231|||C0013231|MEDLINEPLUS|||  
OTC|Medicines, Patent|C0013231|||C0013231|MSH|||  
OTC|Misc/exper non-prescript dru|||C0013231|HCPCS|||  
OTC|NON-PRESCRIPTION DRUGS|C0013231|||C0013231|HCPCS|||  
OTC|Non Prescription Drugs|C0013231|||C0013231|MSH|||  
OTC|Non-Prescription Drugs|C0013231|||C0013231|MEDLINEPLUS;MSH|||  
OTC|Non-prescription drug|C0013231|||C0013231|SNOMEDCT|||  
OTC|Non-prescription drug (product)|||C0013231|SNOMEDCT|||  
OTC|Non-prescription drug (substance)|||C0013231|SNOMEDCT|||  
OTC|Non-prescription drug, NOS|C0013231|||C0013231|SNOMEDCT|||  
OTC|Non-prescription drugs|C0013231|||C0013231|MEDLINEPLUS|||  
OTC|Nonprescription|C0013231|||C0013231|NCI|||  
OTC|Nonprescription Drugs|C0013231|||C0013231|MSH|||  
OTC|ORNITHINE CARBAMOYLTRANSFERASE|C0029279;C1418193|||C1418193|OMIM|||  
OTC|ORNITHINE TRANSCARBAMYLASE|C0029279;C1418193|||C1418193|OMIM|||  
OTC|OTC|C0013231;C1418193;C2709201|||C0013231;C1418193;C2709201|HUGO;LNC;NCI;OMI  
M|||  
OTC|OTC - Over The Counter|C2709201|||C2709201|MTH|||  
OTC|OTC Drugs|C0013231|||C0013231|MSH|||

OTC|OTC Gene|C1418193|||C1418193|NCI|||  
OTC|OTC Medicines|C0013231|||C0013231|MEDLINEPLUS|||  
OTC|OTC drug|C0013231|||C0013231|AOD|||  
OTC|OTC gene|C1418193|||C1418193|HUGO;LNC;MTH|||  
OTC|OTC medicines|C0013231|||C0013231|MEDLINEPLUS|||  
OTC|OTC products|C0013231|||C0013231|SNOMEDCT|||  
OTC|Ornithine Carbamoyltransferase Gene|C1418193|||C1418193|NCI|||  
OTC|Over the Counter|C0013231|||C0013231|NCI|||  
OTC|Over the Counter Drugs|C0013231|||C0013231|MSH|||  
OTC|Over the Counter Product|C0013231|||C0013231|NCI|||  
OTC|Over the counter products|C0013231|||C0013231|SNOMEDCT|||  
OTC|Over the counter products (product)|||C0013231|SNOMEDCT|||  
OTC|Over the counter products (substance)|||C0013231|SNOMEDCT|||  
OTC|Over-the-Counter|C0013231|||C0013231|NCI|||  
OTC|Over-the-Counter Drugs|C0013231|||C0013231|MSH|||  
OTC|Over-the-Counter Medicines|C0013231|||C0013231|MEDLINEPLUS|||  
OTC|Over-the-Counter Product|C0013231|||C0013231|NCI|||  
OTC|PATENT MED|||C0013231|MSH|||  
OTC|Patent Medicines|C0013231|||C0013231|MSH|||  
OTC|counter over product|C0013231|||C0013231|CHV|||  
OTC|heart rate-corrected T interval|||1  
OTC|medicines patent|||C0013231|CHV|||  
OTC|medicines patents|C0013231|||C0013231|CHV|||  
OTC|non prescription drugs|C0013231|||C0013231|CHV|||  
OTC|non-prescription drug|C0013231|||C0013231|CHV|||  
OTC|non-prescription drugs|C0013231|||C0013231|CHV|||  
OTC|nonprescription|C0013231|||C0013231|NCI|||  
OTC|nonprescription drug|C0013231|||C0013231|AOD|||  
OTC|nonprescription drugs|C0013231|||C0013231|CHV|||  
OTC|occult tumor cell|||1  
OTC|open-top chambers|||1|0.0079|  
OTC|organotin compound|C0029259|||C0029259|SNOMEDCT|||  
OTC|ornithine carbamoyltransferase|C0029279;C1418193|||C1418193|HUGO|||  
OTC|ornithine transcarbamoylase|C0029279|1|0.062|C0029279|SNOMEDCT|1|0.0228|1  
OTC|ornithine transcarbamyase|C0029279;C1418193|||1|0.2725|  
OTC|otc product|C0013231|||C0013231|CHV|||  
OTC|otc products|C0013231|||C0013231|CHV|||  
OTC|oval target cell|||1  
OTC|over the counter|C0013231|1|0.938|||1  
OTC|over the counter drugs|C0013231|||C0013231|CHV|||  
OTC|over the counter products|C0013231|||C0013231|CHV|||  
OTC|over-the-counter|C0013231|||C0013231|NCI|1|0.4599|  
OTC|over-the-counter drug|C0013231|||C0013231|AOD;CHV|||  
OTC|over-the-counter drugs|C0013231|||C0013231|CHV|||  
OTC|oxytetracycline|C0030092|||C0030092|CHV;LNC;MSH;MTHFDA;MTHSPL;NCI;NDFRT;RXNORM;SNOMEDCT;USPMG;VANDF|1|0.2032|  
OTC|patent medicine|C0013231|||C0013231|AOD;CHV|||  
OTC|patent medicines|C0013231|||C0013231|CHV|||  
OTC|pharmaceutical drug|C0013231|||C0013231|AOD|||  
OTC|products over the counter|||C0013231|CHV|||  
OT|OT|C1418208;C1705587|||C1418208;C1705587|NCI;OMIM|||  
OT|OXT|||C1418208;C1705587|HUGO;NCI;OMIM|||  
OT|OXT Gene|C1418208|||C1418208|NCI|||  
OT|OXT gene|C1418208|||C1418208|HUGO;MTH|||  
OT|OXT wt Allele|C1705587|||C1705587|MTH;NCI|||  
OT|OXYTOCIN|C0030095;C1704206|||C1418208|OMIM|||  
OT|OXYTOCIN--NEUROPHYSIN I|C1418208|||C1418208|OMIM|||

OT|Ocular torsion|||||1|0.0072|  
OT|Oxytocin, Prepro- (Neurophysin I) Gene||||C1418208|NCI|||  
OT|Oxytocin, Prepro- (Neurophysin I) wt Allele||||C1705587|NCI|||  
OT|PREPROOXYTOCIN|C1418208|||C1418208|OMIM|||  
OT|neurophysin I|C0027897;C1418208|||C1418208|HUGO|||  
OT|object test|||||||1  
OT|objective test|||||||1  
OT|oblique talus|||||||1  
OT|occiput transverse|||||||1  
OT|occlusion time|||||1|0.0072|1  
OT|occupational  
therapist|C0028807;C1610728|||C0028807;C1610728|CHV;HL7V3.0;MTH;NCI;SNOMEDCT|||  
OT|occupational  
therapy|C1318464|1|1.000|C1318464;C1547993|AOD;CHV;CSP;HL7V2.5;ICD9CM;LCH;LNC;ME  
DLINEPLUS;MSH;SNOMEDCT|||1  
OT|ocular tension|C0021888|||C0021888|CHV;CSP;MSH;SNOMEDCT|||1  
OT|office treatment|||||||1  
OT|old terminology|||||||1  
OT|old tuberculin|C0443084|||C0443084|MTH;RXNORM;SNOMEDCT|1|0.0059|  
OT|olfactory threshold|C0597130|||C0597130|CSP|||1  
OT|olfactory  
tubercle|C0162436;C0917714|||C0162436;C0917714|FMA;MSH;MTH|1|0.0379|1  
OT|oligodendroglial tumor|C1335110|||C1335110|NCI|||  
OT|oligosaccharyl transferase|C0283757;C1413949|||1|0.0098|  
OT|oligosaccharyltransferase|C0283757;C1413949|||C0283757;C1413949|MSH;OMIM|||  
OT|on treatment|||||||1  
OT|operating theatre|C0029064|||C0029064|CHV;NCI;SNOMEDCT|1|0.0046|  
OT|optic tectum|C0228405|||C0228405|CSP;FMA;MSH|1|0.0209|  
OT|optic  
tract|C0152405;C1269601|||C0152405;C1269601|CHV;CSP;FMA;MSH;NCI;SNOMEDCT;UWDA|1|  
0.0229|1  
OT|oral temperature|C1532216|||||||1  
OT|oral thrush|C0006849|||||||1  
OT|oral tolerance|C0597140|||C0597140|CHV;CSP;GO|1|0.0078|  
OT|oral transmucosal|||||||1  
OT|organotin|C0029259|||C0029259|CHV;SNOMEDCT|||  
OT|orientation test|||||||1  
OT|original tuberculin|||||||1  
OT|ornithine  
transcarbamylase|C0029279;C1418193|||C0029279;C1418193|CHV;CSP;MSH;NCI;NDFRT;OMI  
M;SNOMEDCT|||  
OT|oro-tracheal|||||||1  
OT|orthopedic treatment|||||||1  
OT|orthostatic tremor|C2315430|||C2315430|SNOMEDCT|1|0.0118|  
OT|otolaryngology|C0029892;C1555801|||C0029892;C1555801|CHV;HL7V3.0;LCH;LNC;MSH;  
NCI;SNOMEDCT|||1  
OT|otology|C0086746|||C0086746|CHV;MSH|||1  
OT|outer table|||||||1  
OT|outflow tract|||||1|0.015|  
OT|outlier threshold|||||||1  
OT|oxytocin|C0030095;C1704206|||C0030095;C0523809;C1418208;C1704206|AOD;CHV;CSP;  
FMA;LCH;LNC;MSH;MTH;MTHSPL;NCI;NDFRT;OMIM;PDQ;RXNORM;SNOMEDCT;USPMG;UWDA;VANDF|1  
|0.8489|1  
OT|oxytocin, prepropeptide|C1418208|||C1418208|HUGO|||  
OU|Ornstein-Uhlenbeck|||||1|0.45|  
OU|both eyes||1|1.000|||||1  
OU|each eye|||||||1

OU|observation unit|||||1|0.55|  
OU|obstructive uropathy|C0178879|||C0178879|CHV;COSTAR;NCI;SNOMEDCT|||  
P0|HMSNIB|C1417248|||C1417248|HUGO|||  
P0|L10E|C1419691|||C1419691|HUGO|||  
P0|LP0|C1419691|||C1419691|HUGO|||  
P0|MPP|C0000098;C1417248|||C1417248|OMIM|||  
P0|MPZ|C1417248|||C1417248|HUGO;OMIM|||  
P0|MPZ gene|C1417248|||C1417248|HUGO;LNC;MTH|||  
P0|MYELIN GLYCOPROTEIN P-ZERO|C1417248|||C1417248|OMIM|||  
P0|MYELIN PROTEIN ZERO|C0071316;C1417248|||C1417248|OMIM|||  
P0|MYELIN PROTEIN, PERIPHERAL|C0302243;C1417248|||C1417248|OMIM|||  
P0|P0|C1417248;C1419691|||C1417248;C1419691|HUGO;OMIM|||  
P0|PRLP0|C1419691|||C1419691|HUGO|||  
P0|RIBOSOMAL PHOSPHOPROTEIN, ACIDIC, P0|C1419691|||C1419691|OMIM|||  
P0|RIBOSOMAL PHOSPHOPROTEIN, LARGE, P0|C1419691|||C1419691|OMIM|||  
P0|RPLP0|C1419691|||C1419691|HUGO;OMIM|||  
P0|RPLP0 gene|C1419691|||C1419691|HUGO;MTH|||  
P0|RPP0|C1419691|||C1419691|HUGO|||  
P0|acidic ribosomal phosphoprotein P0|C1419691|||C1419691|HUGO|||  
P0|day of birth|||||1|0.176|  
P0|isometric force|||||1|0.044|  
P0|isometric tension|||||1|0.036|  
P0|major myelin glycoprotein|||||1|0.02|  
P0|myelin protein zero|C0071316;C1417248|||C1417248|HUGO|||  
P0|newborn|C0021289;C2239178;C2939425|||||1|0.076|  
P0|para 0|||1|1.000|||||  
P0|postnatal day 0|||||1|0.3|  
P0|pressure|C0033095;C0460139;C1306345|||||1|0.056|  
P0|protein zero|||||1|0.256|  
P0|ribosomal protein, large, P0|C1419691|||C1419691|HUGO|||  
P0|tetanic tension|||||1|0.036|  
PAC|(drug) PAC|||1|0.004|||||  
PAC|APC|||C0033036|DXP;NCI|||  
PAC|ARTIFICIAL CHROMOSOMES BACTERIOPHAGE P 001|||||C0949780|MSH|||  
PAC|ATRIAL BEAT PREMATURE|||C0033036|DXP|||  
PAC|Artificial Chromosome, P1-Derived|C0949780|||C0949780|MSH|||  
PAC|Artificial Chromosomes, P1 Bacteriophage|C0949780|||C0949780|MSH|||  
PAC|Artificial Chromosomes, P1-Derived|C0949780|||C0949780|MSH|||  
PAC|Atrial Beat, Premature|C0033036|||C0033036|MSH|||  
PAC|Atrial Beats, Premature|C0033036|||C0033036|MSH|||  
PAC|Atrial Complex, Premature|C0033036|||C0033036|MSH|||  
PAC|Atrial Complices, Premature|C0033036|||C0033036|MSH|||  
PAC|Atrial Contraction, Premature|C0033036|||C0033036|MSH|||  
PAC|Atrial Contractions, Premature|C0033036;C0488348|||C0033036|MSH|||  
PAC|Atrial Ectopic Beat|C0033036|||C0033036|MSH|||  
PAC|Atrial Ectopic Beats|C0033036|||C0033036|COSTAR;MSH;NDFRT|||  
PAC|Atrial Extrasystole|C0033036|||C0033036|MSH|||  
PAC|Atrial Extrasystoles|C0033036|||C0033036|MSH|||  
PAC|Atrial Premature Complex|C0033036|||C0033036|MSH;NCI;NDFRT|||  
PAC|Atrial Premature Complex (APC)|C0033036|||C0033036|CHV|||  
PAC|Atrial Premature Complexes|C0033036|||C0033036|MSH;MTH;NDFRT|||  
PAC|Atrial Premature Complexes [Disease/Finding]|||||C0033036|NDFRT|||  
PAC|Atrial Premature Complices|C0033036|||C0033036|MSH|||  
PAC|Atrial ectopic|C0033036|||C0033036|SNOMEDCT|||  
PAC|Atrial extrasystoles|C0033036|||C0033036|SNOMEDCT|||  
PAC|Atrial premature beats|C0033036|||C0033036|ICD9CM;SNOMEDCT|||  
PAC|Atrial premature complex|C0033036|||C0033036|SNOMEDCT|||

PAC|Atrial premature complex (disorder)|||C0033036|SNOMEDCT|||  
PAC|Atrial premature complex (finding)|||C0033036|SNOMEDCT|||  
PAC|Atrial premature complex [Ambiguous]|||C0033036|SNOMEDCT|||  
PAC|Atrial premature contractions|C0033036|||C0033036|SNOMEDCT|||  
PAC|Atrial premature depolarisation|C0033036|||C0033036|SNOMEDCT|||  
PAC|Atrial premature depolarization|C0033036|||C0033036|SNOMEDCT|||  
PAC|Atrial premature systoles|C0033036|||C0033036|SNOMEDCT|||  
PAC|BACTERIOPHAGE P 001 ARTIFICIAL CHROMOSOMES|||C0949780|MSH|||  
PAC|Bacteriophage P1 Artificial Chromosomes|C0949780|||C0949780|MSH|||  
PAC|CAP|C0179586;C1657858;C1706092;C2985259|||C0280547|PDQ|||  
PAC|CAP-I|C0280547|||C0280547|NCI;PDQ|||  
PAC|CAP-II|C0280547|||C0280547|NCI;PDQ|||  
PAC|CDDP/CTX/DOX|||C0280547|NCI;PDQ|||  
PAC|CHROMOSOMES ARTIFICIAL BACTERIOPHAGE P 001|||C0949780|MSH|||  
PAC|CHROMOSOMES BACTERIOPHAGE ARTIFICIAL P 001|||C0949780|MSH|||  
PAC|CISCA chemotherapy protocol|C0280547|||C0280547|CHV|||  
PAC|CISCA-II|C0280547|||C0280547|NCI;PDQ|||  
PAC|Chromosome, P1-Derived Artificial|C0949780|||C0949780|MSH|||  
PAC|Chromosomes, Artificial, P1 Bacteriophage|C0949780|||C0949780|MSH|||  
PAC|Chromosomes, P1 Bacteriophage Artificial|C0949780|||C0949780|MSH|||  
PAC|Chromosomes, P1-Derived Artificial|C0949780|||C0949780|MSH|||  
PAC|Cisplatin/Cyclophosphamide/Doxorubicin|||C0280547|NCI|||  
PAC|EXTRASYSTOLES ATRIAL|||C0033036|CST|||  
PAC|EXTRASYSTOLES SUPRAVENTRICULAR|||C0033036|CST|||  
PAC|Ectopic Beat, Atrial|C0033036|||C0033036|MSH|||  
PAC|Ectopic Beats, Atrial|C0033036|||C0033036|MSH|||  
PAC|Ectopic atrial beats|C0033036|||C0033036|SNOMEDCT|||  
PAC|Ectopic atrial beats (disorder)|||C0033036|SNOMEDCT|||  
PAC|Ectopic atrial beats, NOS|C0033036|||C0033036|SNOMEDCT|||  
PAC|Endothelial permeability|||1|0.0236|  
PAC|Extrasystole, Atrial|C0033036|||C0033036|MSH;NDFRT|||  
PAC|Extrasystoles, Atrial|C0033036|||C0033036|MSH|||  
PAC|P A 001 BACTERIOPHAGE ARTIFICIAL CHROMOSOMES|||C0949780|MSH|||  
PAC|P1 Bacteriophage Artificial Chromosomes|C0949780|||C0949780|MSH;MTH|||  
PAC|P1 Derived Artificial Chromosomes|C0949780|||C0949780|MSH|||  
PAC|P1-Derived Artificial Chromosome|C0949780|||C0949780|MSH|||  
PAC|P1-Derived Artificial Chromosomes|C0949780|||C0949780|MSH|||  
PAC|P1-derived Artificial Chromosome|C0949780|||C0949780|NCI|||  
PAC|PAC|||C0033036;C0280547;C0700105;C0949780;C2709278|AOD;CHV;CST;LNC;NCI;PDQ|  
||  
PAC|PAC (Chromosome)|||C0949780|MSH|||  
PAC|PAC (in LOINC)|||C2709278|MTH|||  
PAC|PAC - Premature atrial contraction|C0033036|||C0033036|SNOMEDCT|||  
PAC|PACs (Chromosomes)|||C0949780|MSH|||  
PAC|PREMATURE ATRIAL BEATS|C0033036|||C0033036|COSTAR|||  
PAC|PREMATURE ATRIAL COMPLEXES|C0033036|||C0033036|NCI|||  
PAC|PREMATURE ATRIAL CONTRACTION|C0033036|||C0033036|COSTAR|||  
PAC|Peritoneal adherent cells|||1|0.0183|  
PAC|Physical Assessment Center|||1|||  
PAC|Plasma Arc Curing|||1|0.0236|  
PAC|Political action committee|C0700105|||C0700105|MTH|||  
PAC|Port-A-Cath|C0935727|||1|||  
PAC|Port-a-Cath|C0935727|||1|0.0262|  
PAC|Premature Atrial Beat|C0033036|||C0033036|MSH|||  
PAC|Premature Atrial Beats|C0033036|||C0033036|MSH;NDFRT|||  
PAC|Premature Atrial Complex|C0033036|||C0033036|MSH;NCI;NDFRT|||  
PAC|Premature Atrial Complices|C0033036|||C0033036|MSH|||

PAC|Premature Atrial Contraction|C0033036|||C0033036|MSH|||  
PAC|Premature Atrial Contractions|C0033036;C0488348|||C0033036|MSH;NDFRT|||  
PAC|Premature Complex, Atrial|C0033036|||C0033036|MSH|||  
PAC|Premature Complexes, Atrial|C0033036|||C0033036|MSH|||  
PAC|Premature Complices, Atrial|C0033036|||C0033036|MSH|||  
PAC|Premature Supraventricular Beat|C0033036|||C0033036|MSH|||  
PAC|Premature Supraventricular Beats|C0033036|||C0033036|MSH;NDFRT|||  
PAC|Premature atrial complexes|C0033036|||C0033036|NCI|||  
PAC|Premature atrial contraction|C0033036|||C0033036|SNOMEDCT|||  
PAC|Premature atrial contraction (disorder)|||C0033036|SNOMEDCT|||  
PAC|Premature atrial contractions|C0033036;C0488348|||C0033036|LNC|||  
PAC|Progress Assessment Chart|||||1  
PAC|SUPRAVENTRICULAR EXTRASYSTOLES|C0033036|||C0033036|CST|||  
PAC|Supraventricular premature contraction|||C0033036|SNOMEDCT|||  
PAC|Supraventricular Beat, Premature|C0033036|||C0033036|MSH|||  
PAC|Supraventricular Beats, Premature|C0033036|||C0033036|MSH|||  
PAC|Supraventricular Ectopic Beats|C0033036|||C0033036|COSTAR|||  
PAC|Supraventricular ectopic beats|C0033036|||C0033036|SNOMEDCT|||  
PAC|Supraventricular ectopic beats (disorder)|||C0033036|SNOMEDCT|||  
PAC|Supraventricular extrasystoles|C0033036|||C0033036|SNOMEDCT|||  
PAC|Supraventricular premature beats|C0033036|||C0033036|ICD9CM;SNOMEDCT|||  
PAC|Supraventricular premature beats (disorder)|||C0033036|SNOMEDCT|||  
PAC|Supraventricular premature contraction|C0033036|||C0033036|SNOMEDCT|||  
PAC|apc|||C0033036|CHV|||  
PAC|apcs|C0033036;C1456795|||C0033036|CHV|||  
PAC|atrial ectopic|C0033036|||C0033036|CHV|||  
PAC|atrial ectopic beat|C0033036|||C0033036|CHV|||  
PAC|atrial ectopic beats|C0033036|||C0033036|CHV|||  
PAC|atrial ectopics|C0033036|||C0033036|CHV|||  
PAC|atrial premature beat|C0033036|||C0033036|CHV|||  
PAC|atrial premature beats|C0033036|||C0033036|CHV|||  
PAC|atrial premature complex|C0033036|||C0033036|CHV|||  
PAC|atrial premature complexes|C0033036|||C0033036|CHV|||  
PAC|atrial premature contractions|C0033036|||C0033036|CHV|||  
PAC|cisplatin,cyclophosphamide and doxorubicin|||C0280547|CHV|||  
PAC|cisplatin/cyclophosphamide/doxorubicin|||C0280547|PDQ|||  
PAC|cisplatin/cyclophosphamide/doxorubicin protocol|C0280547|||C0280547|MTH|||  
PAC|ectopic atrial beats|C0033036|||C0033036|CHV|||  
PAC|paclitaxel|C0144576|||C0144576|CHV;CSP;LNC;MSH;MTH;MTHSPL;NCI;NDFRT;PDQ;RXNORM;SNOMEDCT;VANDF|1|0.0393|  
PAC|pancreatic adenocarcinoma|C0281361|||C0281361|CHV;NCI;OMIM|||1  
PAC|papular acrodermatitis of childhood|C0263372|||C0263372|MSH;SNOMEDCT|||1  
PAC|para-aminoclonidine|C0048038|||C0048038|MSH;NDFRT|||1  
PAC|parent-adult-child|||||1  
PAC|penicillin acylase|C0030825|||||1|0.034|  
PAC|perennial allergic conjunctivitis|C0339165|||C0339165|SNOMEDCT|1|0.0288|  
PAC|pericarditis, arthropathy, camptodactyly|||||1  
PAC|perturbed angular correlation|||||1|0.034|  
PAC|perturbed angular correlation of gamma-rays|||||1|0.0157|  
PAC|physician assistant certification||1|0.274|||1  
PAC|picture archiving communication||1|0.050|||1  
PAC|plasma aldosterone|||||1|0.0445|  
PAC|plasma aldosterone concentration|||||1  
PAC|political action committee|C0700105|||C0700105|AOD;MTH|||  
PAC|political action committee (PAC)|C0700105|||C0700105|CHV|||  
PAC|polyaluminium chloride|C0051518|||C0051518|MSH|||  
PAC|polyaluminum chloride|C0051518|||C0051518|MSH|1|0.0209|

PAC|polycyclic aromatic compounds|||||1|0.0628|  
PAC|post anesthesia care||1|0.094||||  
PAC|post-acute care|||||1|0.034|  
PAC|powdered activated carbon|||||1|0.1257|  
PAC|preadmission certification|||||||1  
PAC|premature atrial beat|C0033036|||C0033036|CHV|||  
PAC|premature atrial beats|C0033036|||C0033036|CHV|||  
PAC|premature atrial complex|C0033036|||C0033036|CHV;MSH;NCI;NDFRT|||  
PAC|premature atrial complexes|C0033036|||C0033036|CHV|||  
PAC|premature atrial contraction|C0033036|1|0.550|C0033036|CHV;COSTAR;MSH;SNOMEDCT|1|0.0262|1  
PAC|premature atrial contractions|C0033036;C0488348|||C0033036|CHV|||  
PAC|premature atrial systole|C0033036|||C0033036|CHV|||  
PAC|premature atrial systoles|C0033036|||C0033036|CHV|||  
PAC|premature auricular contraction|||||||1  
PAC|pressure-assist control|||||||1  
PAC|primary auditory cortex|C2954070|||C2954070|FMA|1|0.0314|  
PAC|prophylactic anticonvulsant|||||||1  
PAC|prostatic adenocarcinoma|C0007112|||C0007112|CHV;PDQ|1|0.034|  
PAC|pulmonary arterial concentration||1|0.002|||||  
PAC|pulmonary artery catheter|C0179790|1|0.002|C0179790|CHV;SNOMEDCT|1|0.2592|1  
PAC|pulmonary artery catheterization|C0007438;C0190658|||C0007438;C0190658|CHV;MSH;MTH;NCI|1|0.0288|1  
PAC|pulmonary artery constriction|||||1|0.0209|  
PAC|supraventricular extrasystole|C0033036|||C0033036|CHV|||  
PAC|supraventricular premature beats|C0033036|||C0033036|CHV|||  
PAC|surface protein antigen|||||1|0.0681|  
PA|2-aminopyridine|C0051326|||||1|0.0021|  
PA|ACIDIC SALIVARY PROLINE-RICH PROTEIN, HaeIII TYPE, 1|C1418892|||C1418892|OMIM|||  
PA|Assistant, Doctor's|||||C0031833|MSH|||  
PA|Assistant, Physicians'|C0031833|||C0031833|MSH|||  
PA|Assistants, Doctor's|C0031833|||C0031833|MSH|||  
PA|Assistants, Physician|C0031833|||C0031833|MSH|||  
PA|Assistants, Physicians'|C0031833|||C0031833|MSH|||  
PA|Children's Hospital of Philadelphia|||||1|0.0021|  
PA|Children's Hospital of Pittsburgh|||||1|0.0017|  
PA|D-penicillamine|C0030817|||||1|0.0025|  
PA|Doctor Assistants|C0031833|||C0031833|MSH|||  
PA|Doctor's Assistant|||C0031833|MSH|||  
PA|Doctor's Assistants|C0031833|||C0031833|MSH|||  
PA|EPB42|C1414426|||C1414426|HUGO;OMIM|||  
PA|EPB42 gene|C1414426|||C1414426|HUGO;MTH|||  
PA|Erythrocyte surface protein band 4.2|C1414426|||C1414426|HUGO|||  
PA|Extender, Physicians'|C0031833|||C0031833|MSH|||  
PA|Extenders, Physicians'|C0031833|||C0031833|MSH|||  
PA|MGC116735|C1414426|||C1414426|HUGO|||  
PA|MGC116737|C1414426|||C1414426|HUGO|||  
PA|N/m2|C0439473|||C0439473|SNOMEDCT|||  
PA|N/sq. m|C0439473|||C0439473|SNOMEDCT|||  
PA|NIH Program Announcements|C0681477|||C0681477|MTH;NCI|||  
PA|P|||C0439473|NCI|||  
PA|PA|C0031833|||C0030266;C0030428;C0030853;C0031833;C0205469;C0681477;C1414426;C1418225;C1996865|HUGO;LNC;MSH;NCI;OMIM|||  
PA|PALLID, MOUSE, HOMOLOG OF|||C1418225|OMIM|||  
PA|PALLIDIN|C1418225|||C1418225|OMIM|||  
PA|PAN|C0085999|||C0030266|NCI|||

PA|PANAMA|C0030266|||C0030266|NCI|||  
PA|PARAGUAY|C0030428|||C0030428|NCI|||  
PA|PAROTID ACIDIC PROTEIN|C1418892|||C1418892|OMIM|||  
PA|PATHOL|||C0205469|MSH|||  
PA|PHYSICIAN ASSISTANT|C0031833;C3163889|||C0031833|NCI|||  
PA|PLDN|C1418225|||C1418225|HUGO;OMIM|||  
PA|PLDN gene|C1418225|||C1418225|HUGO;MTH|||  
PA|PM|||C0030266|NCI|||  
PA|PRH1|C1418892|||C1418892|HUGO;OMIM|||  
PA|PRH1 gene|C1418892|||C1418892|HUGO;MTH|||  
PA|PROLINE-RICH PROTEIN, HaeIII SUBFAMILY, 1|C1418892|||C1418892|OMIM|||  
PA|PROTEIN 4.2, ERYTHROCYTIC|C1414426|||C1414426|OMIM|||  
PA|PRY|C0030428;C1422358|||C0030428|NCI|||  
PA|PY|C0030428|||C0030428|NCI|||  
PA|Pa|C0031833|||C0439473;C1418892|HUGO;NCI;OMIM;SNOMEDCT|||  
PA|Pa (qualifier value)|||C0439473|SNOMEDCT|||  
PA|Panama|C0030266|||C0030266|AOD;CSP;LCH;MSH;MTH;NCI;SNOMEDCT|||  
PA|Panama (geographic location)|||C0030266|SNOMEDCT|||  
PA|Paraguay|C0030428|||C0030428|AOD;LCH;MSH;MTH;NCI;SNOMEDCT|||  
PA|Paraguay (geographic location)|||C0030428|SNOMEDCT|||  
PA|Paranoia|C1456784|||1|0.0019|  
PA|Pascal|C0439473|||C0439473|HL7V3.0;NCI|||  
PA|Pathological aspects|C0205469|||C0205469|MTH|||  
PA|Pennsylvania|C0030853|||C0030853|AOD;LCH;MSH;MTH;NCI;SNOMEDCT|1|0.0029|  
PA|Pennsylvania (geographic location)|||C0030853|SNOMEDCT|||  
PA|Physician Assistant|C0031833;C3163889|||C0031833|MSH;MTH;NCI|||  
PA|Physician Assistants|C0031833|||C0031833|MSH|||  
PA|Physician Extenders|C0031833|||C0031833|MSH|||  
PA|Physician's Assistants|C0031833|||C0031833|MSH|||  
PA|Physician's Extenders|C0031833|||C0031833|MSH|||  
PA|Physicians Assistants|C0031833|||C0031833|MSH|||  
PA|Physicians' Assistant|C0031833|||C0031833|MSH|||  
PA|Physicians' Assistants|C0031833|||C0031833|MSH|||  
PA|Physicians' Extender|C0031833|||C0031833|MSH|||  
PA|Physicians' Extenders|C0031833|||C0031833|MSH|||  
PA|Physicians' assistants|C0031833|||C0031833|LCH|||  
PA|Picture Arrangement|||1|||1|  
PA|Polyacrylamide|C0071499|||1|0.0027|  
PA|Polyacrylate|C0597265|||1|0.005|  
PA|Postero-Anterior|C1996865|||C1996865|MTH|||  
PA|Program Announcement|C0681477|||C0681477|NCI|||  
PA|Program Announcements|C0681477|||C0681477|NCI|||  
PA|Program Announcements, NIH|C0681477|||C0681477|NCI|||  
PA|Pseudoaneurysm|C0162868;C1510412|||1|0.0032|  
PA|Pseudomonas aeruginosa|C0033809;C1962990|||1|0.0268|1|  
PA|Psoriatic arthritis|C0003872|||1|0.0118|  
PA|Pyridylamino|||1|0.0021|  
PA|Pyrophosphate arthropathy|C1306839|||1|0.0011|  
PA|University of Pittsburgh|||1|0.0013|  
PA|abscess|C0000833;C0549483;C1550609|||1|0.0032|  
PA|acidic protein|||1|0.0013|  
PA|agreement|C0680240|||1|0.0017|  
PA|alcohol|C0001962;C0001975;C0202304|||1|0.0023|  
PA|alveolar partial pressure|||1|||1|  
PA|alveolar pressure|C0232010|||C0232010|CHV;SNOMEDCT|1|0.0086|  
PA|analysis|C0002778;C0936012;C1524024|||1|0.0023|  
PA|apparent permeability coefficient to albumin|||1|0.0002|

PA|arterial blood pressure|C1272641|||||1|0.0032|  
PA|arterial pressure|C0232108;C1272641|||||1|0.0187|  
PA|doctor assistants|C0031833|||C0031833|CHV|||  
PA|erythrocyte membrane protein band 4.2|C1414426|||C1414426|HUGO|||  
PA|newton per square metre|C0439473|||C0439473|MTH|||  
PA|newton/square meter|||C0439473|SNOMEDCT|||  
PA|newton/square metre|||C0439473|SNOMEDCT|||  
PA|nucleus|C0007610|||||1|0.0025|  
PA|paleostriatum augmentatum|||||1|0.0021|  
PA|pallid|||||1|0.0019|  
PA|pallidin homolog (mouse)|||C1418225|HUGO|||  
PA|palmitic  
acid|C0030234|||C0030234|AOD;CHV;FMA;LCH;MSH;NCI;NDFRT;SNOMEDCT;VANDF|||  
PA|panama|C0030266|||C0030266|CHV|||  
PA|pancreatic adenocarcinoma|C0281361|||||1|0.0013|  
PA|panic attack|C0086769|||C0086769|AOD;CHV;MSH;MTHICD9;NCI;SNOMEDCT|||1  
PA|panic attacks|C0086769|||||1|0.0025|  
PA|pantothenic  
acid|C0030342;C0696237;C2700255|||C0030342;C0696237;C2700255|AOD;CHV;MEDLINEPLUS  
;MSH;MTH;MTHSPL;NCI;NDFRT;RXNORM;SNOMEDCT;VANDF|||1  
PA|paraguay|C0030428|||C0030428|CHV|||  
PA|paralysis  
agitans|C0030567|||C0030567|CHV;COSTAR;CSP;CST;DXP;ICD9CM;MEDLINEPLUS;MSH;NDFRT;  
SNOMEDCT|||1  
PA|paranoia|C1456784|||C1456784|AOD;COSTAR;CSP;CST;DXP;MSH;MTH;NCI;NDFRT;OMIM;QM  
R;SNOMEDCT|||1  
PA|paranoid|||||1  
PA|parathyroid adenoma|C0262587|||C0262587|CHV;COSTAR;MSH;NCI;OMIM;SNOMEDCT|||  
PA|parietal antibody|||||1  
PA|partial pressure of alveolar fluid|||||1  
PA|partial pressure of arterial fluid|||||1  
PA|particle agglutination|||||1|0.0124|  
PA|particle agglutination assay|||||1|0.0015|  
PA|particle agglutination test|||||1|0.001|  
PA|parvalbumin|C0030616;C1419140|||C0030616;C1419140|CHV;CSP;HUGO;OMIM;SNOMEDCT|  
1|0.0057|  
PA|pascal|C0439473|||C0439473|NCI;SNOMEDCT|||1  
PA|passive aggressive|||||1  
PA|passive avoidance|||||1|0.0132|  
PA|paternal aunt|||||1  
PA|pathologic|C1521733|||||1  
PA|pathology|C0030664;C0205469;C0677042|||C0030664;C0205469;C0334866;C0677042;C0  
919386|AOD;CHV;CSP;HL7V3.0;LCH;LNC;MSH;MTH;NCI;SNOMEDCT|||1  
PA|peak amplitude|||||1  
PA|peanut allergy|C0559470|||||1  
PA|penicillamine|C0030817|||C0030817|AOD;CHV;CSP;LCH;MSH;MTHSPL;NCI;NDFRT;PDQ;RX  
NORM;SNOMEDCT;USPMG;VANDF|1|0.0017|  
PA|penicillic acid|C0030821|||C0030821|AOD;MSH;NDFRT;SNOMEDCT|||  
PA|penicillin acylase|C0030825|||C0030825|MSH;NDFRT|||  
PA|pennsylvania|C0030853|||C0030853|CHV|||  
PA|pentanoic acid|C0068263|||||1  
PA|perceptual asymmetry|||||1|0.0015|  
PA|performance assessment|||||1|0.0015|  
PA|periapical|C0729269|||||1  
PA|periarteritis|C0264988|||C0264988|CHV;MTHICD9;SNOMEDCT|||1  
PA|peridural artery|||||1  
PA|perinatal asphyxia|C0559477|||C0559477|CHV;MTH;SNOMEDCT|1|0.0055|

PA|periodic acid|C0031068|||C0031068|AOD;CHV;CSP;MSH;NDFRT|||1  
PA|periodontal abscess|C0031085|||1  
PA|permeability area|||1  
PA|permeability-area product|||1|0.0013|  
PA|permeability-surface area product|||1|0.0019|  
PA|pernicious anaemia|C0002892|||1|0.0075|  
PA|pernicious  
anemia|C0002892|||C0002892|AOD;CHV;COSTAR;CSP;ICD9CM;MSH;NCI;OMIM;QMR;SNOMEDCT|1  
|0.0082|1  
PA|peroxidatic activity|||1  
PA|persistent asthma|||1  
PA|phakic-aphakic|||1  
PA|phase angle|||1|0.0019|  
PA|phenol alcohol|||1  
PA|phenylacetate|C0031452;C0220893|||C0031452;C0220893|CHV;CSP;LNC;MSH;MTH;NCI;P  
DQ;RXNORM;SNOMEDCT|1|0.0075|1  
PA|phenylacetic acid|C0070620|||C0070620|CHV;LCH;MSH;NCI;RXNORM;SNOMEDCT|||  
PA|phenylalanine|C0031453|||C0031453|AOD;CHV;CSP;FMA;LCH;LNC;MSH;MTHSPL;NCI;NDFR  
T;RXNORM;SNOMEDCT;VANDF|||  
PA|phenylalkylamine|C0597214|||C0597214|CSP;SNOMEDCT|||  
PA|phonological awareness|||1|0.0011|  
PA|phosphatidate|C0178797|||C0178797|CSP;LNC|1|0.008|  
PA|phosphatidic acid|C0031610|||C0031610|AOD;MSH;NCI;SNOMEDCT|1|0.1592|1  
PA|phosphoarginine|C0070818|||C0070818|MSH|||1  
PA|phosphoric  
acid|C0031700;C0031702;C1161325|||C0031700;C0031702;C1161325|AOD;CHV;CSP;LCH;MSH  
;MTH;MTHSPL;NCI;NDFRT;RXNORM;SNOMEDCT;VANDF|||  
PA|photo allergy|||1  
PA|photoacoustic|||1|0.0057|  
PA|photoallergy|C0206051|||C0206051|CHV;CSP;MSH;SNOMEDCT|||  
PA|phthalic acid|C0070968|||C0070968|AOD;LCH;MSH|||  
PA|phthalic anhydride|C0070969|||C0070969|LNC;MSH;SNOMEDCT|1|0.0059|1  
PA|physical  
activity|C0026606|||C0026606|AOD;CHV;LNC;MSH;MTH;NCI;SNOMEDCT|1|0.0512|1  
PA|physical assistance|||1  
PA|physician  
assistant|C0031833;C3163889|1|0.122|C0031833;C1549987;C1578492;C1704470;C3163889  
|CHV;CSP;HL7V2.5;HL7V3.0;MSH;MTH;NCI;SNOMEDCT|1|0.0059|  
PA|physician assistants|C0031833|||C0031833|CHV|||  
PA|physician associates||1|0.166|||  
PA|physician extender|C0031833|||C0031833|CHV|||  
PA|physician extenders|C0031833|||C0031833|CHV|||  
PA|physician's assistant|C0031833;C3163889|||C0031833|AOD;CHV|||  
PA|physician's assistants|C0031833|||C0031833|CHV|||  
PA|phytic acid|C0031855|||C0031855|CHV;LCH;MSH;NCI;NDFRT;RXNORM|||  
PA|picoampere|||1  
PA|picolinic acid|C0071038|||C0071038|AOD;MSH;RXNORM|||  
PA|pilocytic  
astrocytoma|C0334583|||C0334583|CHV;MSH;MTH;NCI;OMIM;SNOMEDCT|1|0.0031|  
PA|pineapple|C0440279;C0475655;C1113644|||1  
PA|pipecolic acid|C0031951|||C0031951|MSH;MTH;SNOMEDCT|||  
PA|pituitary adenoma|C0032000|||1  
PA|pituitary-adrenal|||1|0.0021|1  
PA|plaque area|||1|0.0025|  
PA|plasma aldosterone|||1  
PA|plasmapheresis|C0032134|||C0032134|AOD;CHV;CSP;LCH;MSH;MTH;NCI;PDQ;SNOMEDCT|1  
|0.0063|

PA|plasminogen activation|C1622667|||C1622667|GO|1|0.004|  
PA|plasminogen  
activator|C0032144|||C0032144;C0042071|AOD;CHV;CSP;MSH;MTH;NCI;NDFRT;SNOMEDCT|1|  
0.1578|1  
PA|platelet adhesiveness|C0032175|||C0032175|MSH|||1  
PA|platelet  
aggregation|C0032176;C0677599|||C0032176;C0677599|AOD;CHV;CSP;GO;LNC;MSH;MTH;NCI  
;SNOMEDCT|1|0.0153|1  
PA|platelet associated|||1  
PA|pleomorphic adenoma|C0026277|||C0026277|CHV;MSH;NCI;SNOMEDCT|1|0.0118|1  
PA|polyacrylamide|C0071499|||C0071499|CHV;CSP;MSH;SNOMEDCT|||1  
PA|polyacrylate|C0597265|||C0597265|CSP|||  
PA|polyadenylation|C0949765|||1|0.0019|  
PA|polyamide|C0028736|||C0028736|CHV;MSH;NDFRT;SNOMEDCT|1|0.0032|  
PA|polyamine|C0032433|||C0032433|CHV;CSP;SNOMEDCT|1|0.0147|  
PA|polyarteritis|C0264992|||C0264992|CHV;SNOMEDCT|||1  
PA|polyarthritis|C0162323|||C0162323|AOD;CHV;COSTAR;CSP;CST;DXP;MSH;MTH;NCI;SNOM  
EDCT|||1  
PA|popliteal  
artery|C0032649;C1278953|||C0032649;C1278953|CHV;FMA;LNC;MSH;NCI;SNOMEDCT;UWDA||  
|  
PA|positive affect|||1|0.0075|  
PA|positive affectivity|||1|0.0017|  
PA|postabsorptive|||1|0.0023|  
PA|postaural|C0442167|||C0442167|SNOMEDCT|||1  
PA|posterior-anterior|C1999039|1|0.424|||1|0.0078|1  
PA|postero-anterior|C1996865|||1|0.0084|  
PA|posteroanterior|||1|0.0273|1  
PA|prealbumin|C0032923|||C0032923|AOD;CHV;LNC;MSH;MTH;NCI;NDFRT;SNOMEDCT|||1  
PA|predictive accuracy|||1  
PA|pregnancy associated|||1  
PA|pregnancy-associated|||1|0.0019|  
PA|preinfarction  
angina|C0002965;C0086666|||C0002965;C0086666|CHV;MSH;MTHICD9;SNOMEDCT|1|0.0015|  
PA|premature adrenarche|C0342546|||C0342546|CHV;OMIM;SNOMEDCT|1|0.0032|1  
PA|presents again|||1  
PA|pressure augmentation|||1  
PA|pressure, alveolar|C0232010|||1  
PA|pressure, atrial|C0428877|||1  
PA|primary aldosteronism|C1384514|||C1384514|CHV;SNOMEDCT|1|0.0225|1  
PA|primary  
amenorrhea|C0232939|||C0232939|CHV;COSTAR;CSP;MTHICD9;OMIM;SNOMEDCT|||1  
PA|primary anemia|||1  
PA|primary angioplasty|||1|0.0017|  
PA|prior to admission|||1  
PA|proactivator|||1  
PA|proanthocyanidin|C0072018|||C0072018|CHV;MSH;MTH;NCI;SNOMEDCT|1|0.0027|1  
PA|procainamide|C0033216|||C0033216|AOD;CHV;CSP;LNC;MSH;MTH;NCI;NDFRT;RXNORM;SNO  
MEDCT;USPMG;VANDF|1|0.017|  
PA|professional association|C0680403|||1  
PA|program announcement|C0681477|||C0681477|AOD|||  
PA|progressive aphasia|C0338457|||1|0.001|  
PA|proinsulin antibody|||1  
PA|proline-rich protein HaeIII subfamily 1|C1418892|||C1418892|HUGO|||  
PA|prolonged action|||1  
PA|prophylactic antibiotic|C0362063|||1

PA|propionic acid|C0033482;C0072186|||C0033482;C0072186|AOD;CHV;LCH;MSH;MTH;NCI;NDFRT;RXNORM;SNOMEDCT;VANDF|||1  
PA|propionic acidaemia|C0268579|||1|0.0019|  
PA|propionic acidemia|C0268579|||C0268579|CHV;CSP;LNC;MSH;MTH;NCI;NDFRT;OMIM;SNOMEDCT|1|0.0044|  
PA|prostate adenocarcinoma|C0007112|||1|0.0013|  
PA|prostate antigen|C1704988|||C1704988|NCI|||1  
PA|protactinium|C0033597|||1  
PA|protective antigen|C1443846|||C1443846|SNOMEDCT|1|0.0417|1  
PA|proteolytic activity|||1  
PA|prothrombin activity|C0200396|||1  
PA|proton affinity|||1|0.0021|  
PA|protrusio acetabuli|C0409495|||C0409495|CHV;MTH;OMIM;SNOMEDCT|||1  
PA|pseudoaneurysm|C0162868;C1510412|||1  
PA|psoriatic arthropathy|C0003872|||1|0.0011|  
PA|psychoanalysis|C0033884;C0392892|||1  
PA|psychoanalyst|C0600090|||C0600090|CHV;SNOMEDCT|||1  
PA|psychogenic aspermia|||1  
PA|psychosocial assessment|C1455743|||1  
PA|pubic arch|C0735723|||1  
PA|pullulan acetate|||1|0.0011|  
PA|pulmonary|C0024109;C2707265;C2709248|||1|0.0017|  
PA|pulmonary angiography|C0677490|||C0677490|CHV;SNOMEDCT|1|0.0027|1  
PA|pulmonary arterial|||1|0.0138|  
PA|pulmonary arterial pressure|C1168098|||C1168098|CHV|||1  
PA|pulmonary artery|C0034052;C1269026|1|0.276|C0034052;C1269026|AOD;CHV;CSP;FMA;HL7V2.5;LCH;LNC;MSH;NCI;SNOMEDCT;UWDA|1|0.1368|1  
PA|pulmonary atresia|C0242855|||C0242855|CHV;MSH;NDFRT;OMIM;SNOMEDCT|1|0.0042|1  
PA|pulmonary auscultation|||1|0.002|||1  
PA|pulmonary autograft|||1  
PA|pulmonaryarterial|||1  
PA|pulpoaxial|||1  
PA|pulse amplitude|||1|0.005|  
PA|pulsus alternans|C0232121|||1  
PA|puromycin aminonucleoside|C0034146|||C0034146|MSH;NDFRT|1|0.0075|1  
PA|pyloric atresia|C0266159|||1|0.0019|  
PA|pyridylaminated|||1|0.0031|  
PA|pyrophosphate arthropathy|C1306839|||1  
PA|pyrrolizidine alkaloid|C0034335|||C0034335|CHV|1|0.0105|1  
PA|pyruvic acid|C0072802|||C0072802|CHV;MSH;MTH;NDFRT;RXNORM;SNOMEDCT|||1  
PA|solitary parathyroid adenoma|||1|0.001|  
PA|yearly|C0332181|||1  
PCA|2-Pyrrolidinone-5-Carboxylic Acid|C0034330|||C0034330|NCI|||1  
PCA|2-Pyrrolidone-5-Carboxylate|C0034330|||C0034330|NCI|||1  
PCA|2-Pyrrolidone-5-Carboxylic Acid|C0034330|||C0034330|NCI|||1  
PCA|4-Chloroamphetamine|C0030131|||C0030131|NCI|||1  
PCA|5 oxoproline|C0034330|||C0034330|CHV|||1  
PCA|5-Carboxy-2-Pyrrolidinone|C0034330|||C0034330|NCI|||1  
PCA|5-Ketoproline|C0034330|||C0034330|MSH;NDFRT|||1  
PCA|5-L-Oxoproline|C0034330|||C0034330|NCI|||1  
PCA|5-Oxo-L-Proline|C0034330|||C0034330|NCI|||1  
PCA|5-Oxo-L-proline|C0034330|||C0034330|SNOMEDCT|||1  
PCA|5-Oxoproline|C0034330|||C0034330|LNC;MSH;NDFRT;SNOMEDCT|||1  
PCA|5-Oxoproline (substance)|||C0034330|SNOMEDCT|||1

PCA|5-Oxopyrrolidine-2-Carboxylic Acid|C0034330|||C0034330|MSH;NDFRT|||  
PCA|5-Pyrrolidinone-2-Carboxylic Acid|C0034330|||C0034330|NCI|||  
PCA|5-oxoproline|C0034330|||C0034330|CHV|||  
PCA|A. cerebri posterior|||C0149576|UWDA|||  
PCA|AMYLOIDOSIS IX|C0268398|||C0268398|OMIM|||  
PCA|AMYLOIDOSIS, FAMILIAL CUTANEOUS LICHEN|C0268398|||C0268398|OMIM|||  
PCA|AMYLOIDOSIS, PRIMARY CUTANEOUS, 1|C0268398|||C0268398|OMIM|||  
PCA|AMYLOIDOSIS, PRIMARY LOCALIZED CUTANEOUS, 1|C0268398|||C0268398|OMIM|||  
PCA|Acid, Pyroglutamic|C0034330|||C0034330|MSH|||  
PCA|Acid, Pyrrolidonecarboxylic|C0034330|||C0034330|MSH|||  
PCA|Amyloidosis IX|C0268398|||C0268398|SNOMEDCT|||  
PCA|Analgesia, Patient Controlled|C0078944|||C0078944|MSH|||  
PCA|Analgesia, Patient-Controlled|C0078944|||C0078944|MSH|||  
PCA|Analyses, Principal Component|C0429865|||C0429865|MSH|||  
PCA|Analysis, Principal Component|C0429865;C1704235|||C0429865|MSH|||  
PCA|Anaphylaxis, Passive Cutaneous|C0030625|||C0030625|MSH|||  
PCA|Arteria cerebri posterior|||C0149576|FMA|||  
PCA|Arteries, Posterior Cerebral|C0149576|||C0149576|MSH|||  
PCA|Artery, Posterior Cerebral|C0149576;C1269013|||C0149576|MSH|||  
PCA|Benzeneethanamine, 4-chloro-alpha-methyl-|C0030131|||C0030131|MSH;NDFRT|||  
PCA|CHLORAMPHETAMINE P|C0030131|||C0030131|MSH|||  
PCA|CHLOROAMPHETAMINE P|C0030131|||C0030131|MSH|||  
PCA|CHOANAL ATRESIA, POSTERIOR|C0220723|||C0220723|DXP;MTH;OMIM|||  
PCA|Ca<sup>2+</sup> concentration|||1|0.0012|  
PCA|Cerebral Arteries, Posterior|C0149576|||C0149576|MSH|||  
PCA|Cerebral Artery, Posterior|C0149576;C1269013|||C0149576|MSH|||  
PCA|Cutaneous Anaphylaxis, Passive|C0030625|||C0030625|MSH|||  
PCA|Dominant primary localised cutaneous amyloidosis|C0268398|||C0268398|SNOMEDCT|||  
PCA|Dominant primary localized cutaneous amyloidosis|C0268398|||C0268398|SNOMEDCT|||  
PCA|Dominant primary localized cutaneous amyloidosis (disorder)|||C0268398|SNOMEDCT|||  
PCA|FELINE LEUKEMIA VIRUS SUBGROUP C RECEPTOR 1|C1836722|||C1836722|OMIM|||  
PCA|FLVCR|C1836722|||C1836722|HUGO;OMIM|||  
PCA|FLVCR1|C1836722|||C1836722|HUGO;OMIM|||  
PCA|FLVCR1 gene|C1836722|||C1836722|HUGO;MTH|||  
PCA|Familial amyloidosis cutis|C0268398|||C0268398|SNOMEDCT|||  
PCA|Familial generalised dyschromic amyloidosis cutis|C0268398|||C0268398|SNOMEDCT|||  
PCA|Familial generalized dyschromic amyloidosis cutis|C0268398|||C0268398|SNOMEDCT|||  
PCA|Familial lichen amyloidosis|C0268398|||C0268398|MTH;SNOMEDCT|||  
PCA|Familial lichen amyloidosis (disorder)|||C0268398|SNOMEDCT|||  
PCA|L-5-Oxoproline|C0034330|||C0034330|NCI|||  
PCA|L-Glutamic Acid Gamma-Lactam|C0034330|||C0034330|NCI|||  
PCA|L-Proline, 5-oxo-|C0034330|||C0034330|MSH;NDFRT|||  
PCA|L-Pyroglutamic Acid|C0034330|||C0034330|NCI|||  
PCA|LICHEN AMYLOIDOSIS, FAMILIAL|C0268398|||C0268398|OMIM|||  
PCA|MFSD7B|C1836722|||C1836722|HUGO|||  
PCA|OXOPROLINE 05|||C0034330|MSH|||  
PCA|PCA|C0268398;C1552962;C1836722|||C0030131;C0030625;C0034330;C0078944;C0149576;C0220723;C0268398;C0429865;C1549860;C1836722|HL7V2.5;HUGO;MSH;NCI;OMIM|||  
PCA|PCA - Patient controlled analgesia|C0078944|||C0078944|SNOMEDCT|||  
PCA|PCA Message Structure|C1549860|||C1549860|MTH|||  
PCA|PCA1|C0268398;C1414407;C1823176|||C0268398|OMIM|||  
PCA|PIDOLIC ACID|C0034330|||C0034330|NCI|||

PCA|PLCA1|C0268398|||C0268398|OMIM|||  
PCA|PRINCIPAL COMPONENT ANAL|||C0429865|MSH|||  
PCA|Para-chloroamphetamine|C0030131|||1|0.005|  
PCA|Parachloroamphetamine|C0030131|||C0030131|MSH;NCI;NDFRT|||  
PCA|Passive Cutaneous Anaphylaxis|C0030625|||C0030625|MSH;MTH|||  
PCA|Passive cutaneous anaphylactic|||1|0.0066|  
PCA|Patient Controlled Analgesia|C0078944|||C0078944|MSH|||  
PCA|Patient controlled analgesia|C0078944|||C0078944|SNOMEDCT|||  
PCA|Patient controlled analgesia (procedure)|||C0078944|SNOMEDCT|||  
PCA|Patient-Controlled Analgesia|C0078944|||C0078944|MSH;MTH;NCI|||  
PCA|Pidolic Acid|C0034330|||C0034330|MSH;NCI;NDFRT|||  
PCA|Porous-coated anatomic|||1|0.0113|  
PCA|Posterior Cerebral Arteries|C0149576|||C0149576|MSH|||  
PCA|Posterior Cerebral Artery|C0149576;C1269013|||C0149576|MSH;NCI|||  
PCA|Posterior cerebral artery|C0149576;C1269013|||C0149576|FMA;SNOMEDCT;UWDA|||  
PCA|Posterior cerebral artery, NOS|C0149576;C1269013|||C0149576|SNOMEDCT|||  
PCA|Posterior cortical atrophy|||1|0.0047|  
PCA|Principal Component Analyses|C0429865|||C0429865|MSH|||  
PCA|Principal Component Analysis|C0429865;C1704235|||C0429865|MSH;MTH;NCI|||  
PCA|Principal Components Analysis|C0429865|||C0429865|NCI|||  
PCA|Pyroglutamic Acid|C0034330|||C0034330|MSH;NDFRT|||  
PCA|Pyroglutamic acid|C0034330|||C0034330|SNOMEDCT|||  
PCA|Pyroglutamic acid (substance)|||C0034330|SNOMEDCT|||  
PCA|Pyrrolidonecarboxylic Acid|C0034330|||C0034330|MSH;MTH;NCI;NDFRT;RXNORM|||  
PCA|Pyrrolidonecarboxylic Acid [Chemical/Ingredient]|||C0034330|NDFRT|||  
PCA|Structure of posterior cerebral artery|C0149576|||C0149576|MTH;SNOMEDCT|||  
PCA|Structure of posterior cerebral artery (body structure)|||C0149576|SNOMEDCT|||  
PCA|alpha-Methyl-p-chlorophenethylamine|C0030131|||C0030131|NCI|||  
PCA|analgesia controlled patient|||C0078944|CHV|||  
PCA|feline leukemia virus subgroup C cellular receptor 1|C1836722|||C1836722|HUGO|||  
PCA|p Chloramphetamine|C0030131|||C0030131|MSH|||  
PCA|p Chloroamphetamine|C0030131|||C0030131|MSH|||  
PCA|p-Chloramphetamine|C0030131|||C0030131|MSH;NDFRT|||  
PCA|p-Chloroamphetamine|C0030131|||C0030131|MSH;MTH;NCI;NDFRT|||  
PCA|p-Chloroamphetamine [Chemical/Ingredient]|||C0030131|NDFRT|||  
PCA|p-chloroamphetamine|C0030131|||C0030131|AOD|1|0.0479|  
PCA|pancreatic cancer|C0235974;C0346647;C2984259|||1|  
PCA|pancreatic carcinoma|C0235974|||1|  
PCA|para Chloroamphetamine|C0030131|||C0030131|MSH|||  
PCA|para-Chloroamphetamine|C0030131|||C0030131|MSH;NDFRT|||  
PCA|para-chloramphetamine|||1|  
PCA|parachloroamphetamine|C0030131|||C0030131|MSH;NCI;NDFRT|1|0.0045|  
PCA|parenteral controlled analgesia|||1|  
PCA|parietal cell|C0030559|||1|0.0019|  
PCA|parietal cell antibodies|||1|0.0075|  
PCA|parietal cell antibody|C0369797;C0863184|||C0369797;C0863184|CHV;LNC;MTH;SNOMEDCT|||1|  
PCA|passive cutaneous anaphylaxis|C0030625|||C0030625|AOD;MSH;MTH|1|0.1002|1|  
PCA|passive cutaneous anaphylaxis (PCA)|C0030625|||C0030625|CHV|||  
PCA|patient care attendant|||1|0.002|||  
PCA|patient controlled analgesia|C0078944|||C0078944|CHV|||  
PCA|patient-controlled analgesia|C0078944|1|0.996|C0078944|CHV;MSH;MTH;NCI|1|0.1818|1|  
PCA|patient-controlled analgesic|||1|0.0019|1|  
PCA|pca|C0268398;C1552962;C1836722|||C0030625|CHV|||

PCA|pentachloroanisole|C0070265|||||1|0.0026|  
PCA|percent cortical area|||||1|0.0009|  
PCA|perchloric acid|C0030981|||C0030981|AOD;MSH;NDFRT;SNOMEDCT|1|0.0151|1  
PCA|percutaneous carotid angiography|||||1|  
PCA|percutaneous carotid angioplasty|||||1|  
PCA|percutaneous carotid arteriogram|||||1|  
PCA|phenylcarboxylic acid|||||1|  
PCA|photocontact allergic|||||1|  
PCA|photocontact allergic allergy|||||1|  
PCA|plasma calcium|C0858090|||||1|0.0014|  
PCA|plasma catecholamines|||||1|  
PCA|plate count agar|||||1|0.0035|  
PCA|porous-coated anatomic|||||1|  
PCA|portacaval anastomosis|C0032716|||||1|0.0151|1  
PCA|portocaval anastomosis|C0032716|||||1|0.0045|  
PCA|postcardiac arrest|||||1|  
PCA|postciliary artery|||||1|  
PCA|postconceptional age|||||1|0.0205|1  
PCA|postcoronary arrest|||||1|  
PCA|posterior cerebral|||||1|0.0026|  
PCA|posterior cerebral  
artery|C0149576;C1269013|||C0149576;C1269013|CHV;FMA;MSH;NCI;SNOMEDCT;UWDA|1|0.0  
41|1  
PCA|posterior ciliary arteries|||||1|0.0028|  
PCA|posterior ciliary artery|C0923318|||C0923318|FMA;UWDA|||  
PCA|posterior communicating aneurysm|||||1|  
PCA|posterior communicating artery|C0149559;C1269014|||||1|  
PCA|posterior  
cricoarytenoid|C0224179;C0448337|||C0224179;C0448337|FMA;MTH;SNOMEDCT;UWDA|1|0.0  
297|1  
PCA|posterior cricoarytenoid muscle|C0224179|||C0224179|SNOMEDCT|1|0.0075|  
PCA|precoronary care area|||||1|  
PCA|prehospital cardiac arrest|||||1|  
PCA|principal component analyses|C0429865|||||1|0.0064|  
PCA|principal component  
analysis|C0429865;C1704235|||C0429865;C1704235|MSH;MTH;NCI;SNOMEDCT|1|0.2491|  
PCA|principal components analysis|C0429865|||C0429865|AOD|||  
PCA|principal-components analysis|C0429865|||||1|  
PCA|probe competition assay|||||1|0.0009|  
PCA|procoagulant activity|||||1|0.0717|1  
PCA|prostate adenocarcinoma|C0007112|||||1|0.0026|  
PCA|prostate  
cancer|C0376358;C0600139;C2984325|||C0376358;C0600139;C2984325|CHV;CSP;MEDLINEPL  
US;MSH;NCI;OMIM;PDQ|1|0.1057|1  
PCA|prostate carcinoma|C0600139|||C0600139|CHV;MTH;NCI;SNOMEDCT|1|0.0142|1  
PCA|prostatic adenocarcinoma|C0007112|||||1|0.0035|1  
PCA|prostatic carcinoma|C0600139|||C0600139|CHV;COSTAR;CST|1|0.0097|  
PCA|protected catheter aspirate|||||1|  
PCA|protein fragment complementation assay|||||1|0.0009|  
PCA|protocatechuate|||||1|0.0047|  
PCA|protocatechuic acid|C0072489|||C0072489|MSH|1|0.0064|  
PCA|pyroglutamic acid|C0034330|||C0034330|CHV|||  
PCA|pyrrolidone carboxylic acid|C0034330|||||1|  
PCA|weeks post-conceptional age|||||1|0.0024|  
PCI|ACTIVATED PROTEIN C INHIB|||C0072348|MSH|||  
PCI|Acrosomal Serine Protease Inhibitor|C0072348|||C0072348|NCI|||  
PCI|Activated Protein C Inhibitor|C0072348|||C0072348|MSH;NDFRT|||

PCI|Activated protein C inhibitor|C0072348|||C0072348|SNOMEDCT|||  
PCI|Activated protein C inhibitor (substance)|||C0072348|SNOMEDCT|||  
PCI|Alpha-1 Antiproteinase|C0002191;C0072348|||C0072348|NCI|||  
PCI|Antitrypsin|C0072348;C1418544|||C0072348|NCI|||  
PCI|Isogravimetric capillary pressure|||1|0.0064|  
PCI|PAI 03|||C0072348|MSH|||  
PCI|PAI-3|C0072348|||C0072348|MSH;NCI;NDFRT;SNOMEDCT|||  
PCI|PAI3|C1418370|||C1418370|HUGO|||  
PCI|PCI|||C0072348;C1418370;C1514496;C1705930|NCI;OMIM|||  
PCI|PLANH3|C0072348;C1705930|||C0072348;C1705930|NCI|||  
PCI|PLASMINOGEN ACTIVATOR INHIB 3|||C0072348|MSH|||  
PCI|PLASMINOGEN ACTIVATOR INHIB TYPE 3|||C0072348|MSH|||  
PCI|PLASMINOGEN ACTIVATOR INHIBITOR 03|||C0072348|MSH|||  
PCI|PROCI|C0072348;C1418370;C1705930|||C0072348;C1418370;C1705930|HUGO;NCI|||  
PCI|PROTEIN C INHIB|||C0072348|MSH|||  
PCI|PROTEIN C INHIB ACTIVATED|||C0072348|MSH|||  
PCI|PROTEIN C INHIBITOR|C0072348;C1418370|||C1418370|OMIM|||  
PCI|Phenomenology of Consciousness Inventory|||1|0.0051|  
PCI|Photochemical internalisation|||1|0.0077|  
PCI|Picocurie|C2347515|||C2347515|MTH;NCI|||  
PCI|Plasma Serine Protease Inhibitor|C0072348|||C0072348|NCI|||  
PCI|Plasminogen Activator Inhibitor 3|C0072348|||C0072348|MSH;NDFRT|||  
PCI|Plasminogen Activator Inhibitor III|C0072348|||C0072348|NCI|||  
PCI|Plasminogen Activator Inhibitor, Type 3|C0072348|||C0072348|MSH;NDFRT|||  
PCI|Plasminogen Activator Inhibitor-3|C0072348|||C0072348|NCI|||  
PCI|Plasminogen activator inhibitor-3|C0072348|||C0072348|SNOMEDCT|||  
PCI|Plasminogen activator inhibitor-3 (substance)|||C0072348|SNOMEDCT|||  
PCI|Pneumatosis cystoides intestinalis|C0032266|||1|0.039|  
PCI|Potato carboxypeptidase inhibitor|||1|0.0109|  
PCI|Premarital Communication Inventory|||1|  
PCI|Prophylactic Cranial Irradiation|C1514496|||C1514496|MTH;NCI|||  
PCI|Protein C Inhibitor|C0072348;C1418370|||C0072348|MSH;MTH;NCI;NDFRT|||  
PCI|Protein C Inhibitor [Chemical/Ingredient]|||C0072348|NDFRT|||  
PCI|Protein C Inhibitor, Activated|C0072348|||C0072348|MSH;NDFRT|||  
PCI|Protein C inhibitor|C0072348;C1418370|||C0072348|LNC;SNOMEDCT|1|0.0722|  
PCI|Protein C inhibitor.activated|||C0072348|LNC|||  
PCI|SERPIN PEPTIDASE INHIBITOR, CLADE A, MEMBER 5|||C1418370|OMIM|||  
PCI|SERPINA5|C0072348;C1418370|||C0072348;C1418370|HUGO;NCI;OMIM|||  
PCI|SERPINA5 Gene|C1418370|||C1418370|NCI|||  
PCI|SERPINA5 gene|C1418370|||C1418370|HUGO;MTH|||  
PCI|SERPINA5 wt Allele|C1705930|||C1705930|MTH;NCI|||  
PCI|Serine (or Cysteine) Proteinase Inhibitor, Clade A (Alpha-1 Antiproteinase, Antitrypsin), Member 5 Gene|||C1418370|NCI|||  
PCI|Serine (or Cysteine) Proteinase Inhibitor, Clade A (Alpha-1 Antiproteinase, Antitrypsin), Member 5 wt Allele|||C1705930|NCI|||  
PCI|Serine or Cysteine Proteinase Inhibitor Clade A Member 5|||C0072348|NCI|||  
PCI|Serpina5|C0072348|||C0072348|MSH;NCI;NDFRT|||  
PCI|TYPE 3 PLASMINOGEN ACTIVATOR INHIB|||C0072348|MSH|||  
PCI|Type 3 Plasminogen Activator Inhibitor|C0072348|||C0072348|MSH;NDFRT|||  
PCI|pCi|||C2347515|NCI|||  
PCI|partial coherence interferometry|||1|0.0115|1|  
PCI|percutaneous coronary intervention|C1532338|1|0.998|C1532338|SNOMEDCT|1|0.7284|1|  
PCI|peritoneal cancer index|||1|0.0045|  
PCI|photochemical internalization|||1|0.0096|  
PCI|physiological cost index|||1|0.016|  
PCI|picocurie|C2347515|||1|

PCI|pneumatosis cystoides  
intestinalis|C0032266||C0032266|DXP;MSH;NDFRT;SNOMEDCT|||1  
PCI|positive chemical ionization|||||1|0.007|  
PCI|posterior curve intermediate|||||1  
PCI|proliferating cell index|||||1|0.0032|  
PCI|prophylactic cranial irradiation|C1514496||C1514496|MTH;NCI|1|0.0786|1  
PCI|prothrombin consumption index|||||1  
PCI|serpin peptidase inhibitor, clade A (alpha-1 antiprotease, antitrypsin),  
member 5||||C1418370|HUGO|||  
PCP|1-(1-Phenylcyclohexyl)piperidine||||C0031381|MSH;NDFRT|||  
PCP|5-OXOPROLYL PEPTIDASE|C0034307;C1422070||C1422070|OMIM|||  
PCP|ANGIOTENSINASE C|C0072114;C1418873||C1418873|OMIM|||  
PCP|Angel Dust|C0031381||C0031381|MSH;NDFRT|||  
PCP|Angel dust|C0031381||C0031381|SNOMEDCT|||  
PCP|Angel dust measurement|C0202445||C0202445|SNOMEDCT|||  
PCP|Dust, Angel|C0031381||C0031381|MSH|||  
PCP|HUMPCP|C1418873||C1418873|HUGO|||  
PCP|Interstitial plasma cell pneumonia|C0032305||C0032305|LCH;SNOMEDCT|||  
PCP|PCP|||C0030855;C0031381;C0032305;C0033131;C0202445;C1418873;C1422070;C17446  
53|AOD;CHV;CSP;GO;HUGO;LNC;NCI;OMIM;SNOMEDCT|||  
PCP|PCP - Pentachlorophenol|C0030855||C0030855|SNOMEDCT|||  
PCP|PCP - Phencyclidine|C0031381||C0031381|SNOMEDCT|||  
PCP|PCP - Pneumocystis carinii pneumonia|C0032305||C0032305|SNOMEDCT|||  
PCP|PCP - Pneumocystis pneumonia|C0032305||C0032305|SNOMEDCT|||  
PCP|PCP - Primary care physician|C0033131||C0033131|SNOMEDCT|||  
PCP|PCP Measurement|C0202445||C0202445|NCI|||  
PCP|PCP measurement|C0202445||C0202445|SNOMEDCT|||  
PCP|PGP|C1418520;C1422070||C1422070|HUGO;OMIM|||  
PCP|PGP I|C1422070||C1422070|OMIM|||  
PCP|PGP-I|C1422070||C1422070|HUGO|||  
PCP|PGPEP1|C1422070||C1422070|HUGO;OMIM|||  
PCP|PGPEP1 gene|C1422070||C1422070|HUGO;MTH|||  
PCP|PGPI|C1422070||C1422070|HUGO|||  
PCP|PHENCYCLIDINE|C0031381;C0202445;C2919094||C0031381|NCI;NDFRT;VANDF|||  
PCP|PJP|C0032305||C0032305|NCI|||  
PCP|PNEUMOCYSTIS CARINII PNEUMONIA|C0032305||C0032305|DXP|||  
PCP|PNEUMOCYSTIS PNEUMONIA|C0032305||C0032305|QMR|||  
PCP|PNEUMONIA, INTERSTITIAL PLASMA CELL|C0032305||C0032305|DXP|||  
PCP|PNEUMONIA, PNEUMOCYSTIS|C0032305||C0032305|DXP|||  
PCP|PNEUMONIA, PNEUMOCYSTIS CARINII|C0032305||C0032305|DXP|||  
PCP|PRCP|C1418873||C1418873|HUGO;OMIM|||  
PCP|PRCP gene|C1418873||C1418873|HUGO;MTH|||  
PCP|PROLYLCARBOXYPEPTIDASE|C0072114;C1418873||C1418873|OMIM|||  
PCP|PYROGLUTAMYL PEPTIDASE I|C0034307;C1422070||C1422070|OMIM|||  
PCP|PYRROLIDONE-CARBOXYLATE PEPTIDASE|C0034307;C1422070||C1422070|OMIM|||  
PCP|Pcp|||C1422070|HUGO|||  
PCP|Pentachlorophenol|C0030855||C0030855|LCH;LNC;MSH;MTH;NDFRT;SNOMEDCT|||  
PCP|Pentachlorophenol (substance)|||C0030855|SNOMEDCT|||  
PCP|Pentachlorophenol [Chemical/Ingredient]|||C0030855|NDFRT|||  
PCP|Phencyclidine|C0031381;C0202445;C2919094||C0031381;C0202445|LCH;LNC;MSH;MTH  
;NCI;NDFRT;SNOMEDCT|||  
PCP|Phencyclidine (substance)|||C0031381|SNOMEDCT|||  
PCP|Phencyclidine Measurement|C0202445||C0202445|NCI|||  
PCP|Phencyclidine [Chemical/Ingredient]|||C0031381|NDFRT|||  
PCP|Phencyclidine measurement|C0202445||C0202445|MTH;SNOMEDCT|||  
PCP|Phencyclidine measurement (procedure)|||C0202445|SNOMEDCT|||  
PCP|Phencyclidine substance of abuse|||C0031381|SNOMEDCT|||

PCP|Phencyclidine substance of abuse (substance)|||C0031381|SNOMEDCT|||  
PCP|Phenol, pentachloro-|C0030855||C0030855|MSH;NDFRT|||  
PCP|Phenylcyclohexylpiperidine|C0202445||C0202445|NCI|||  
PCP|Physician, Primary Care|C0033131||C0033131|MSH|||  
PCP|Physicians, Primary Care|C0033131||C0033131|MSH|||  
PCP|Piperidine, 1-(1-phenylcyclohexyl)-|||C0031381|MSH;NDFRT|||  
PCP|Pneumocystis|C0032305;C0597258||C0032305|NCI|||  
PCP|Pneumocystis Carinii Pneumonia|C0032305||C0032305|COSTAR;NCI|||  
PCP|Pneumocystis Jiroveci Pneumonia|C0032305;C1535939||C0032305|NCI|||  
PCP|Pneumocystis Pneumonia|C0032305||C0032305|MSH;NCI;NDFRT|||  
PCP|Pneumocystis Pneumonias|C0032305||C0032305|MSH|||  
PCP|Pneumocystis carinii|C032276;C0182833;C0320385|||1|0.0094|  
PCP|Pneumocystis carinii Pneumonia|C0032305||C0032305|MSH;NDFRT|||  
PCP|Pneumocystis carinii pneumonia|C0032305||C0032305|CSP;SNOMEDCT|1|0.332|  
PCP|Pneumocystis carinii pneumonia (disorder)|||C0032305|SNOMEDCT|||  
PCP|Pneumocystis carinii pneumonitis|||1|0.0044|  
PCP|Pneumocystis jiroveci pneumonia|C0032305;C1535939|1|0.588|||1|  
PCP|Pneumocystis pneumonia|C0032305||C0032305|CSP|||  
PCP|Pneumocystoses|C0032305||C0032305|MSH|||  
PCP|Pneumocystosis|C0032305||C0032305|ICD9CM;MSH;NDFRT;SNOMEDCT|||  
PCP|Pneumocystosis (disorder)|||C0032305|SNOMEDCT|||  
PCP|Pneumocystosis jiroveci pneumonia|C0032305||C0032305|SNOMEDCT|||  
PCP|Pneumocystosis jiroveci pneumonia (disorder)|||C0032305|SNOMEDCT|||  
PCP|Pneumocystosis pneumonia|C0032305||C0032305|SNOMEDCT|||  
PCP|Pneumocytosis|||C0032305|SNOMEDCT|||  
PCP|Pneumonia due to Pneumocystis  
carinii|C0032305||C0032305|MTHICD9;SNOMEDCT|||  
PCP|Pneumonia, Interstitial Plasma Cell|C0032305||C0032305|MSH;NDFRT|||  
PCP|Pneumonia, Pneumocystis|C0032305||C0032305|MSH;NDFRT|||  
PCP|Pneumonia, Pneumocystis [Disease/Finding]|||C0032305|NDFRT|||  
PCP|Pneumonia, Pneumocystis carinii|C0032305||C0032305|MSH;MTH;NDFRT|||  
PCP|Pneumonias, Pneumocystis|C0032305||C0032305|MSH|||  
PCP|Pneumonias, Pneumocystis carinii|C0032305||C0032305|MSH|||  
PCP|Primary Care Physician|C0033131||C0033131|MSH|||  
PCP|Primary Care Physicians|C0033131||C0033131|MSH;MTH|||  
PCP|Primary care physician|C0033131||C0033131|SNOMEDCT|||  
PCP|Primary care physician (occupation)|||C0033131|SNOMEDCT|||  
PCP|Procollagen C-proteinase|C1412804|||1|0.0035|  
PCP|Pulmonary pneumocystosis|C0032305||C0032305|SNOMEDCT|||  
PCP|Pulmonary pneumocystosis (disorder)|||C0032305|SNOMEDCT|||  
PCP|[3H]Phencyclidine|||1|0.0038|  
PCP|aminoacylproline carboxypeptidase activity|||C1744653|GO|||  
PCP|angel dust|C0031381||C0031381|CHV|||  
PCP|care physician primary|||C0033131|CHV|||  
PCP|care physicians primary|||C0033131|CHV|||  
PCP|interstitial plasma cell pneumonia|C0032305||C0032305|CSP|||  
PCP|lysosomal Pro-Xaa carboxypeptidase activity|||C1744653|GO|||  
PCP|palliative care program|||1|  
PCP|parachlorophenolate|||1|  
PCP|parachlorophenol|C0048197||C0048197|MSH;MTH;NCI;NDFRT;RXNORM;SNOMEDCT;VANDF  
|||  
PCP|patient care plan|C0030678|||1|  
PCP|pentachlorophenol|C0030855||C0030855|CHV;LCH;LNC;MSH;MTH;NDFRT;SNOMEDCT|1|0  
.1764|1|  
PCP|pentachlorophenol (PCP)|C0030855||C0030855|CHV|||  
PCP|peptidyl carrier protein|||1|0.0063|  
PCP|peptidylprolylamino acid carboxypeptidase activity|||C1744653|GO|||

PCP|peripheral coronary pressure|||||||1  
PCP|persistent cough and phlegm|||||||1  
PCP|phencyclidine|C0031381;C0202445;C2919094|1|0.186|C0031381;C0202445|AOD;CHV;C  
SP;LCH;LNC;MSH;MTH;NCI;NDFRT;SNOMEDCT;VANDF|1|0.3795|1  
PCP|phencyclidine (PCP) test|||C0202445|CHV|||  
PCP|phencyclidine hydrochloride|C0282301|||||1|0.0057|  
PCP|phencyclidine(PCP)|||C0031381|CHV|||  
PCP|phencyclidines|C0031381||C0031381|CHV|||  
PCP|phenol-chloroform-petroleum ether||||||1|0.0031|  
PCP|planar cell polarity||||||1|0.0173|  
PCP|pneumococcal capsular polysaccharide||||||1|0.0031|  
PCP|pneumocystic pneumonia|||||||1  
PCP|pneumocystis carinii pneumonia|C0032305||C0032305|CHV|||  
PCP|pneumocystis carinii pneumonia (PCP)|C0032305||C0032305|CHV|||  
PCP|pneumocystis pneumonia|C0032305||C0032305|CHV;CSP;MSH;NCI;NDFRT;QMR|||  
PCP|pneumocystosis|C0032305||C0032305|CHV|||  
PCP|pollen-coat protein|||||||1  
PCP|postoperative constrictive pericarditis|||||||1  
PCP|primary care  
physician|C0033131|1|0.222|C0033131|CHV;CSP;HL7V3.0;MSH;SNOMEDCT|1|0.0252|1  
PCP|primary care physicians|C0033131||C0033131|CHV|||  
PCP|primary care  
provider|C1547431;C2735025;C2735026||C1547431;C2735025;C2735026|HL7V2.5;LNC;MTH  
|1|0.0132|1  
PCP|primary physician care|C0033131||C0033131|CHV|||  
PCP|procollagen peptide|C0443754|||||||1  
PCP|proline carboxypeptidase activity|||C1744653|GO|||  
PCP|prolyl carboxypeptidase activity|||C1744653|GO|||  
PCP|prolylcarboxypeptidase|C0072114;C1418873||C0072114;C1418873|MSH;OMIM|||  
PCP|prolylcarboxypeptidase (angiotensinase C)|||C1418873|HUGO|||  
PCP|protein C activation peptide|C0072347|||||1|0.0019|  
PCP|pulmonary capillary pressure||||||1|0.0123|1  
PCP|pulse cytophotometry|||||||1  
PCP|pyroglutamyl-peptidase I|C0034307;C1422070||C1422070|HUGO|||  
PCP|pyrrolidone carboxyl peptidase||||||1|0.0028|  
PCP|serine-type Pro-X carboxypeptidase activity|C1744653||C1744653|GO;MTH|||  
PCR|CR|||C0677874|NCI|||  
PCR|Complete Remission|C0677874||C0677874|NCI|||  
PCR|In complete remission|C0677874||C0677874|MTH;SNOMEDCT|||  
PCR|In complete remission (qualifier value)|||C0677874|SNOMEDCT|||  
PCR|PCR|C0032520;C0677874||C0032520|AOD;CHV;CSP;MSH;NCI;PDQ|||  
PCR|PCR - Polymerase chain reaction|C0032520||C0032520|SNOMEDCT|||  
PCR|Pathological Complete Remission|C0677874||C0677874|NCI|||  
PCR|Polymerase Chain Reaction|C0032520||C0032520|MSH;MTH;NCI|||  
PCR|Polymerase Chain Reactions|C0032520||C0032520|MSH|||  
PCR|Polymerase chain reaction|C0032520||C0032520|HL7V3.0;SNOMEDCT|||  
PCR|Polymerase chain reaction (qualifier value)|||C0032520|SNOMEDCT|||  
PCR|Principal Component Regression||||||1|0.0022|  
PCR|Reaction, Polymerase Chain|C0032520||C0032520|MSH|||  
PCR|Reactions, Polymerase Chain|C0032520||C0032520|MSH|||  
PCR|complete remission|C0677874||C0677874|CHV;NCI|1|0.0007|  
PCR|complete response|C0677874||C0677874|CHV;NCI|||  
PCR|enzymatic amplification||||||1|0.0004|  
PCR|full remission|C0677874||C0677874|AOD|||  
PCR|pCR|C0032520;C0677874||C0677874|NCI|||  
PCR|pathologic complete response||||||1|0.002|  
PCR|pathologically confirmed complete remission|||||||1

PCR|patient care report|||||||1  
PCR|patient contact record|||||||1  
PCR|percutaneous coronary revascularization|||||||1  
PCR|phosphocreatine|C0031634|||C0031634|AOD;CHV;CSP;MSH;NDFRT;SNOMEDCT|1|0.0003|  
1  
PCR|phosphocreatinine|C0070826|||||1|0.0005|  
PCR|photoconvulsive response|||||||1  
PCR|plaque control record|||||1|0.0003|  
PCR|plasma clearance rate|||||||1  
PCR|plasma creatinine|C1278055|||||1|0.001|  
PCR|plasma creatinine concentration|||||1|0.0004|  
PCR|polymerase chain|||||1|0.0004|  
PCR|polymerase chain  
reaction|C0032520|1|1.000|C0032520|AOD;CHV;CSP;HL7V3.0;MSH;MTH;NCI;PDQ;SNOMEDCT|  
1|0.983|1  
PCR|polymerase chain reaction (PCR)|C0032520|||C0032520|CHV|||  
PCR|polymerase chain reaction amplification|||||1|0.0006|  
PCR|polymerase chain reaction assay|||||1|0.0009|  
PCR|polymerase chain reaction method|||||1|0.0011|  
PCR|polymerase chain reaction technique|||||1|0.0011|  
PCR|postcompression remodeling|||||||1  
PCR|probable causal relationship|||||||1  
PCR|progressive condylar resorption|||||||1  
PCR|protein catabolic rate|||||1|0.0046|1  
PCR|psychiatric case register|||||1|0.0004|  
PDA|DUCTUS ARTERIOSUS PATENT|C0013274|||C0013274|CST|||  
PDA|DUCTUS ARTERIOSUS, PATENT|C0013274|||C0013274|DXP|||  
PDA|Dorsal aortic blood pressure|||||1|0.0063|  
PDA|Ductus Arteriosus, Patent|C0013274|||C0013274|MSH;NDFRT|||  
PDA|Ductus Arteriosus, Patent [Disease/Finding]|||C0013274|NDFRT|||  
PDA|PATENT DUCTUS ARTERIOSUS|C0013274|||C0013274|CST;OMIM;QMR|||  
PDA|PDA|C0013274;C0226047|||C0013274;C0226047|FMA;OMIM;UWDA|||  
PDA|PDA - Patent ductus arteriosus|C0013274|||C0013274|SNOMEDCT|||  
PDA|PDA1|C0013274|||C0013274|OMIM|||  
PDA|Patency of the Ductus Arteriosus|C0013274|||C0013274|MSH;NDFRT|||  
PDA|Patent Ductus Arteriosus|C0013274|||C0013274|COSTAR;MSH;NCI|||  
PDA|Patent arterial duct|C0013274|||C0013274|SNOMEDCT|||  
PDA|Patent ductus Botalli|C0013274|||C0013274|MTHICD9;SNOMEDCT|||  
PDA|Patent ductus arteriosus|C0013274|||C0013274|CCS;ICD9CM;MTH;OMIM;SNOMEDCT|||  
PDA|Patent ductus arteriosus (disorder)|||C0013274|SNOMEDCT|||  
PDA|Patent ductus arteriosus - persisting type|C0013274|||C0013274|SNOMEDCT|||  
PDA|Patent ductus arteriosus - persisting type  
(disorder)|||C0013274|SNOMEDCT|||  
PDA|Persistent ductus arteriosus|C0013274|||C0013274|MTHICD9;SNOMEDCT|||  
PDA|Personal Digital Assistant|C1136134|||||1|0.0875|  
PDA|Population and Community Development Association|||||1|0.0135|  
PDA|Posterior descending artery|C0226047;C0500492|||C0226047|FMA;UWDA|||  
PDA|Posterior descending branch of right coronary  
artery|C0226047|||C0226047|FMA;SNOMEDCT;UWDA|||  
PDA|Posterior descending coronary artery|C0226047|||C0226047|FMA;UWDA|||  
PDA|Posterior interventricular artery|C0226047|||C0226047|UWDA|||  
PDA|Posterior interventricular branch of right coronary  
artery|C0226047|||C0226047|FMA;MTH;UWDA|||  
PDA|Ramus interventricularis posterior|||C0226047|UWDA|||  
PDA|Ramus interventricularis posterior (Arteria coronaria  
dextra)|||C0226047|FMA|||  
PDA|Right posterior interventricular artery|C0226047|||C0226047|FMA|||

PDA|Structure of posterior descending branch of right coronary artery|C0226047|||C0226047|SNOMEDCT|||  
PDA|Structure of posterior descending branch of right coronary artery (body structure)|||C0226047|SNOMEDCT|||  
PDA|arteriosus ductus patent|C0013274|||C0013274|CHV|||  
PDA|arteriosus ductus patent|C0013274|||C0013274|CHV|||  
PDA|cis-2,3-piperidine dicarboxylic acid|||||1|0.0187|  
PDA|ductus arteriosus persistent|||C0013274|CHV|||  
PDA|pancreatic ductal adenocarcinoma|C1335302|||C1335302|MTH;NCI|1|0.0052|  
PDA|pancreaticoduodenal artery|C1709455|||||1|0.0125|  
PDA|panic disorder and agoraphobia|||||1|0.0073|  
PDA|panic disorder with agoraphobia|C0236800|||C0236800|CHV;CSP;MTHICD9;SNOMEDCT|||  
PDA|parenteral drug abuser|||||1|  
PDA|patent arteriosus ductus|C0013274|||C0013274|CHV|||  
PDA|patent ductus arteriosus|C0013274|||C0013274|CHV|||  
PDA|patent ductus arteriosus|C0013274|1|0.276|C0013274|AOD;CCS;CHV;COSTAR;CSP;CST;ICD9CM;MSH;MTH;NCI;OMIM;QMR;SNOMEDCT|1|0.7188|1|  
PDA|pathological demand avoidance|||||1|  
PDA|patient distress alarm|||||1|  
PDA|pediatric allergy|||||1|  
PDA|pericardial diaphragmatic adhesion|||||1|  
PDA|persistent ductus arteriosus|C0013274|||C0013274|CHV|||  
PDA|personal digital assistant|C1136134|||C1136134|CHV;MSH;MTH|||1|  
PDA|phenylenediamine|C0031468|||C0031468|AOD;CHV;CSP;NDFRT;VANDF|||1|  
PDA|phorbol 12,13-diacetate|||||1|0.0333|  
PDA|photodiode array|||||1|0.0292|  
PDA|plantar digital artery|C0226481;C1279877|||||1|  
PDA|polydiacetylene|C0218502|||C0218502|MSH|||1|  
PDA|polymorphic delta activity|||||1|0.0042|1|  
PDA|poorly differentiated adenocarcinoma|||||1|  
PDA|posterior descending artery|C0226047;C0500492|1|0.722|C0226047;C0500492|CHV;FMA;SNOMEDCT;UWDA|1|0.0198|1|  
PDA|posterior descending artery (PDA)|C0226047;C0500492|||C0226047|CHV|||1|  
PDA|posterior interventricular artery (PIV)|C0226047|||C0226047|CHV|||1|  
PDA|potato dextrose agar|||||1|0.0323|  
PDA|predialyzed human albumin|||||1|  
PDA|prolonged depolarizing afterpotential|||||1|0.0115|  
PDA|property damage accident|||||1|  
PDA|pulmonary disease anemia|||||1|  
PD|(device) PD||1|0.012|||1|  
PD|(drug) PD||1|0.006|||1|  
PD|PALLADIUM|C0030230|||C0030230|NCI|||1|  
PD|PARK|C0562547;C3160718|||C3160718|OMIM|||1|  
PD|PARKINSON DISEASE, LATE-ONSET|C3160718|||C3160718|OMIM|||1|  
PD|PD|C0030230;C2362652;C3160718|||C1524059;C2362652;C3160718|MSH;OMIM;SNOMEDCT|||1|  
PD|PHARMACOL|||C1524059|MSH|||1|  
PD|Palladium|C0030230|||C0030230|LCH;LNC;MSH;MTH;NCI;NDFRT;SNOMEDCT|||1|  
PD|Palladium (substance)|||C0030230|SNOMEDCT|||1|  
PD|Palladium Metallicum|C0030230|||C0030230|NCI|||1|  
PD|Palladium [Chemical/Ingredient]||||C0030230|NDFRT|||1|  
PD|Palladium, NOS|C0030230|||C0030230|SNOMEDCT|||1|  
PD|Pancreas divisum|C0266270|||||1|0.0016|  
PD|Parkinson disease|C0030567;C1521736;C2681933|1|0.002|||1|1|

PD|Parkinson's disease|C0030567;C1521736;C2681933|||||1|0.5496|  
PD|Parkinson's disease with dementia|||||1|0.0003|  
PD|Parkinsonism|C0242422|||||1|0.0009|  
PD|Pd|C0030230;C2362652;C3160718|||C0030230|NCI|||  
PD|Pd - Palladium|C0030230|||C0030230|SNOMEDCT|||  
PD|Pd element|C0030230|||C0030230|CSP|||  
PD|Perfusion defect|||||1|0.0009|  
PD|Phosducin|C0084024;C1335199|||||1|0.0011|  
PD|Possible|C0332149;C1705910;C2362652|||C2362652|SNOMEDCT|||  
PD|Possible diagnosis|C2362652|||C2362652|MTH;SNOMEDCT|||  
PD|Possible diagnosis (contextual qualifier)||||C2362652|SNOMEDCT|||  
PD|Possible diagnosis (contextual qualifier) (qualifier value)||||C2362652|SNOMEDCT|||  
PD|Possibly|C2362652|||C2362652|SNOMEDCT|||  
PD|Postnatal Day|||||1|0.0243|  
PD|Prenatal diagnosis|C0033053|||||1|0.0023|  
PD|Preterm Delivery|C0151526|||||1|0.0006|  
PD|Prisoner's Dilemma|C0033166|||||1|0.0011|  
PD|Prolidase deficiency|C0268532|||||1|0.0008|  
PD|Psychopathic deviate|||||1|0.0017|  
PD|after pancreaticoduodenectomy|||||1|0.001|  
PD|after pancreatoduodenectomy|||||1|0.0014|  
PD|along the proximodistal|||||1|0.0008|  
PD|cell membrane potential|C0311434|||||1|0.0007|  
PD|coronary artery|C0205042;C1269008|||||1|0.0006|  
PD|cyclic nucleotide phosphodiesterase|C1413553|||||1|0.0006|  
PD|depression|C0011570;C0011581;C0344315;C0460137|||||1|0.001|  
PD|diastolic pressure|C0428883|||C0428883|CHV;MSH;NCI|1|0.0007|  
PD|diffusional water permeability|||||1|0.0014|  
PD|disease of bone|C0005940|||||1|0.0011|  
PD|disease progression|C0242656;C1947900|||||1|0.001|  
PD|duration|C0449238;C2926735|||||1|0.0009|  
PD|interpupillary distance|C1275637|||C1275637|SNOMEDCT|||  
PD|mechanism of action|C0031327;C1524059|||C1524059|MSH|||  
PD|mechanism of action qualifier|C1524059|||C1524059|MTH|||  
PD|mode of action|C1524059|||C1524059|MSH|||  
PD|paired domain|||||1|0.0017|  
PD|palladium|C0030230|||C0030230|AOD;CHV;CSP|||1|  
PD|pancreas divisum|C0266270|||C0266270|CHV;MTHMST;SNOMEDCT|||1|  
PD|pancreatic duct|C0030288;C1269003|1|0.016|C0030288;C1269003|CHV;CSP;FMA;LCH;LNC;MSH;MTH;NCI;SNOMEDCT;UWDA|1|0.0015|1|  
PD|pancreaticoduodenectomy|C0085162|||C0085162|CHV;MSH;SNOMEDCT|||  
PD|pancreatoduodenectomy|C0085162|||C0085162|CHV;CSP;MSH;NCI|||1|  
PD|panic disorder|C0030319;C1868649|||C0030319;C1868649|AOD;CHV;COSTAR;CSP;DXP;MEDLINEPLU S;MSH;MTH;NCI;NDFRT;OMIM;SNOMEDCT|1|0.0419|1|  
PD|papilla diameter|||||1|  
PD|paralyzing dose|||||1|  
PD|parkinsonian|||||1|0.001|  
PD|parkinsonian dementia|||||1|  
PD|paroxysmal discharge|||||1|  
PD|pars distalis|||||1|0.0066|1|  
PD|patent ductus||1|0.002|||||1|  
PD|patient day|||||1|  
PD|patient demonstration|||||1|  
PD|patients|C0030705|||||1|0.0017|

PD|pediatric dose|||||||1  
PD|pediatrics|C0030755|||||||1  
PD|percutaneous discectomy|C0206080|||||||1  
PD|percutaneous drain|||||||1  
PD|percutaneous drainage|||||1|0.0012|  
PD|period|C0439531;C1948053|||||||1  
PD|periodontal  
disease|C0031090|||C0031090|AOD;CHV;COSTAR;CSP;LCH;MEDLINEPLUS;MSH;NCI;OMIM;SNOM  
EDCT|||  
PD|peripheral dose|||||1|0.0009|  
PD|peritoneal dialysate|C0353714|||||1|0.0013|  
PD|peritoneal  
dialysis|C0031139;C1555974|1|0.818|C0031139;C1706534|AOD;CCS;CHV;DXP;ICD9CM;LCH;  
MEDLINEPLUS;MSH;MTH;NCI;SNOMEDCT|1|0.1391|1  
PD|peritoneal drainage|||||1|0.0008|  
PD|persistent diarrhea|C0743188|||||1|0.0012|  
PD|persistent diarrhoea|C0743188|||||1|0.0012|  
PD|personality  
disorder|C0031212|1|0.002|C0031212|AOD;CHV;COSTAR;CSP;CST;DXP;ICPC;MSH;NCI;SNOME  
DCT|1|0.0182|1  
PD|pharmacodynamic|C0851347;C1709518|||C0851347;C1709518|CHV;NCI|||  
PD|pharmacodynamics|C0243145;C0851347|||C0243145;C0851347|AOD;CHV;CSP;MSH;MTH;NC  
I|||1  
PD|pharmacokinetic (PK)-pharmacodynamic|||||1|0.0009|  
PD|pharmacology|C0031330;C1524059|||C1524059|MSH|||  
PD|phenyldichloroarsine|C0070673|||||||1  
PD|phosphate dehydrogenase||1|0.018|||||1  
PD|phosphate depletion|||||1|0.0023|  
PD|photosensitivity dermatitis|C0031762|||||||1  
PD|physical diagnosis|||||||1  
PD|pirfenidone|C0298067|||||1|0.0009|  
PD|plasma defect|||||||1  
PD|plasma desorption|||||1|0.0011|  
PD|plasmodesma|C1135842|||C1135842|GO|||  
PD|plasmodesmata|C1135842|||||1|0.0019|  
PD|platelet deposition|||||1|0.0006|  
PD|pneumatic dilatation|||||1|0.0007|  
PD|pneumatic dilation|||||1|0.0009|  
PD|pocket depth|||||||1  
PD|police department||1|0.028|||||  
PD|poorly differentiated|C0205617|||C0205617|CHV;MTH;NCI;SNOMEDCT|1|0.0019|1  
PD|population doublings|||||1|0.0068|  
PD|porphobilinogen deaminase|C0032706;C1415597|||||||1  
PD|postdischarge|||||||1  
PD|posterior descending||1|0.068|||||1  
PD|posterior division|||||||1  
PD|postnasal drainage|||||||1  
PD|postural drainage|C0086915|||C0086915|CHV;MSH;MTHICD9;SNOMEDCT|1|0.0011|1  
PD|potential difference|||||1|0.0848|1  
PD|potential difference across the cell membrane|||||1|0.0009|  
PD|power Doppler|||||1|0.0049|  
PD|power density|||||1|0.0012|  
PD|prednisolone|C0032950|||||1|0.0016|  
PD|preferred direction|||||1|0.0009|  
PD|prenatal diagnosis|C0033053|||C0033053|AOD;CHV;CSP;LCH;MSH|||  
PD|present disease|||||||1  
PD|pressor dose|||||||1

PD|pressure dressing|C1289828|||||1  
PD|primary dendrite|||||1  
PD|prism diopter||1|0.006||||1  
PD|prism diopters|C0439487||||1|0.007|  
PD|prism dioptres|C0439487||||1|0.0009|  
PD|prisoner's dilemma|C0033166|||C0033166|MSH|||  
PD|probing depth|C1317646|||C1317646|CHV;LNC|1|0.0392|1  
PD|probing pocket depth|||||1|0.0021|  
PD|problem drinker|C0687725|||||1  
PD|process diagnostic|||||1  
PD|progressed|C1272688||||1|0.0011|  
PD|progression disease|||||1  
PD|progressive disease|C0677932;C1335499|||C0677932;C1335499|MTH;NCI;OMIM|||1  
PD|prostatodynia|C0240812|||||1  
PD|protein|C0033684||||1|0.0009|  
PD|protein  
degradation|C0597297;C0597304;C1623036|||C0597297;C0597304;C1623036|CHV;CSP;GO;M  
SH;NCI|1|0.0013|1  
PD|protein deposition|C0333584||||1|0.0005|  
PD|protein deprived|||||1  
PD|protein diet|C0452269|||||1  
PD|proton density|||||1|0.0033|  
PD|provocation dose|||||1  
PD|proximal-distal|||||1|0.0014|  
PD|pseudodeficiency|||||1|0.0016|  
PD|psychiatric disorder|C0004936|||C0004936|AOD;CHV;NCI;SNOMEDCT|||  
PD|psychological distress|C0815107|||C0815107|AOD;CHV|||  
PD|psychopathic deviate|||||1  
PD|psychotic dementia|||||1  
PD|psychotic depression|C0270458|||||1  
PD|pulmonary disease|C0024115;C1555769|||||1  
PD|pulpodistal|||||1  
PD|pulse duration|||||1  
PD|pulsed Doppler|C0242846||||1|0.0022|1  
PD|pulsed diastolic|||||1  
PD|pupil diameter|C0489618|||C0489618|CHV;LNC|||1  
PD|pupillary diameter|||||1|0.001|  
PD|pupillary distance|C0946328|||||1  
PD|pure dysarthria|||||1  
PD|pyloric dilator|||||1|0.0047|1  
PD|pyridostigmine|C0034261|||C0034261|CHV;CSP;LNC;MSH;NCI;NDFRT;RXNORM;SNOMEDCT;  
USPMG;VANDF|1|0.0046|  
PEEP|End-Expiratory Pressure, Positive|C0032740|||C0032740|MSH|||  
PEEP|End-Expiratory Pressures, Positive|C0032740|||C0032740|MSH|||  
PEEP|PEEP|C0032740|||C0032740|MSH|||  
PEEP|PEEP - Positive end expiratory pressure|C0032740|||C0032740|SNOMEDCT|||  
PEEP|Positive End Expiratory Pressure|C0032740|||C0032740|MSH|||  
PEEP|Positive End-Expiratory Pressure|C0032740|||C0032740|MSH;MTH|||  
PEEP|Positive End-Expiratory Pressures|C0032740|||C0032740|MSH|||  
PEEP|Positive Pressure Respiration|C0032740|||C0032740|MSH|||  
PEEP|Positive Pressure Ventilation|C0021778;C0032740|||C0032740|MSH|||  
PEEP|Positive end expiratory pressure|C0032740|||C0032740|SNOMEDCT|||  
PEEP|Positive end expiratory pressure (observable  
entity)|||C0032740|SNOMEDCT|||  
PEEP|Positive-Pressure Respiration|C0032740|||C0032740|MSH|||  
PEEP|Positive-Pressure Respirations|C0032740|||C0032740|MSH|||  
PEEP|Positive-Pressure Ventilation|C0021778;C0032740|||C0032740|MSH|||

PEEP|Positive-Pressure Ventilations|C0032740|||C0032740|MSH|||  
PEEP|Pressure, Positive End-Expiratory|C0032740|||C0032740|MSH|||  
PEEP|Pressure.positive end expiratory|||C0032740|LNC|||  
PEEP|Pressures, Positive End-Expiratory|C0032740|||C0032740|MSH|||  
PEEP|Respiration, Positive-Pressure|C0032740|||C0032740|MSH|||  
PEEP|Respirations, Positive-Pressure|C0032740|||C0032740|MSH|||  
PEEP|Ventilation, Positive-Pressure|C0021778;C0032740|||C0032740|MSH|||  
PEEP|Ventilations, Positive-Pressure|C0032740|||C0032740|MSH|||  
PEEP|peak end-expiratory pressure|||||1  
PEEP|peep|C0032740|||C0032740|CHV|||  
PEEP|peeps|C0032740|||C0032740|CHV|||  
PEEP|positive and expiratory pressure|||||1|0.0161|  
PEEP|positive end expiratory pressure|C0032740|||C0032740|CHV;MSH;SNOMEDCT|||  
PEEP|positive end expiratory pressure (PEEP)|C0032740|||C0032740|CHV|||  
PEEP|positive end-expiratory pressure|C0032740|1|1.000|C0032740|CHV|1|0.9694|1  
PEEP|positive end-expiratory pressure ventilation|||||1|0.0145|  
PEEP|positive pressure breathing|C0032740|||C0032740|CHV;CSP|||  
PEEP|positive pressure respiration|C0032740|||C0032740|AOD;CHV|||  
PEG|1,2 Propanediol|||C0072225|MSH|||  
PEG|1,2-Dihydroxypropane|||C0072225|NCI|||  
PEG|1,2-Propanediol|||C0072225|MSH;NCI;NDFRT|||  
PEG|Endoscopic gastrostomy|C0176751|||C0176751|MTHMST|||  
PEG|Ethanol, 2,2'-(oxybis(2,1-ethanediyloxy)bis-|||C0032478|NCI|||  
PEG|Glycol 400, Polyethylene|C0032478|||C0032478|MSH|||  
PEG|Glycol, Polyethylene|C0032478;C0032483|||C0032483|MSH;NCI|||  
PEG|Glycol, Propylene|C0072225|||C0072225|MSH|||  
PEG|Glycol, polyethylene|C0032478;C0032483|||C0032483|NCI|||  
PEG|Glycols, Polyethylene|C0032483|||C0032483|MSH|||  
PEG|Macrogol|C0032483|||C0032483|MSH;SNOMEDCT|||  
PEG|Macrogol (substance)|||C0032483|SNOMEDCT|||  
PEG|Macrogols|C0032483|||C0032483|MSH;NDFRT|||  
PEG|Oxide, Polyethylene|C0032478;C0032483|||C0032483|MSH|||  
PEG|Oxides, Polyethylene|C0032483|||C0032483|MSH|||  
PEG|PEG|||C0032478;C0032483;C0072225;C0176751|CSP;LNC;MTHICD9;MTHMST;NCI|||  
PEG|PEG (procedure)|C0176751|||C0176751|MTHMST|||  
PEG|PEG - Percutaneous endoscopic gastrostomy|C0176751|||C0176751|SNOMEDCT|||  
PEG|PEG - Polyethylene glycol|C0032483|||C0032483|SNOMEDCT|||  
PEG|PEG-400|C0032478|||C0032478|MSH;NDFRT;VANDF|||  
PEG|PEO 400|C0032478|||C0032478|MSH|||  
PEG|PEO-400|C0032478|||C0032478|MSH|||  
PEG|POLYETHYLENE  
GLYCOL|C0032478;C0032483|||C0032478;C0032483|MTHSPL;NCI;NDFRT;VANDF|||  
PEG|POLYETHYLENE GLYCOL 400|C0032478|||C0032478|MTHSPL;NCI;NDFRT;VANDF|||  
PEG|POLYETHYLENE GLYCOL 400 @ @ UNIDENTIFIED|||C0032478|RXNORM|||  
PEG|POLYETHYLENE GLYCOL 400 LIQUID|C0032478;C1178139|||C0032478|NDFRT;VANDF|||  
PEG|POLYETHYLENE GLYCOL 400 UNIDENTIFIED|||C0032478|RXNORM|||  
PEG|POLYETHYLENE GLYCOL 400 [VA Product]|C0032478|||C0032478|NDFRT|||  
PEG|POLYOXYETHYLENE|C0032483|||C0032483|NDFRT;VANDF|||  
PEG|PROPANEDIOL 01 02|||C0072225|MSH|||  
PEG|PROPYLENE GLYCOL|C0072225|||C0072225|MTHSPL;NCI;NDFRT;VANDF|||  
PEG|Patient Evaluation Grid|||||1  
PEG|Peg 400|C0032478|||C0032478|MSH|||  
PEG|Percu endosc gastrostomy|||C0176751|ICD9CM|||  
PEG|Percutaneous [endoscopic] gastrostomy [PEG]|C0176751|||C0176751|ICD9CM|||  
PEG|Percutaneous endoscopic  
gastrostomy|C0176751|||C0176751|MTH;MTHICD9;SNOMEDCT|||  
PEG|Percutaneous endoscopic gastrostomy (procedure)|||C0176751|SNOMEDCT|||

PEG|Percutaneous gastrostomy|C0176751|||C0176751|LNC;MTHICD9|||  
PEG|Percutaneous gastrostomy (procedure)|||C0176751|MTHMST|||  
PEG|Percutaneous transabdominal gastrostomy|C0176751|||C0176751|MTHICD9|||  
PEG|Poly(oxyethylene)|||C0032478|NCI|||  
PEG|Polyethylene Glycol|C0032478;C0032483|||C0032483|MSH;NCI;NDFRT|||  
PEG|Polyethylene Glycol 400|C0032478|||C0032478|MSH;MTH;MTHSPL;NCI;RXNORM|||  
PEG|Polyethylene Glycols|C0032483|||C0032483|MSH;MTH;NDFRT;RXNORM|||  
PEG|Polyethylene Glycols [Chemical/Ingredient]|||C0032483|NDFRT|||  
PEG|Polyethylene Oxide|C0032478;C0032483|||C0032478;C0032483|MSH;NCI;NDFRT|||  
PEG|Polyethylene Oxides|C0032483|||C0032483|MSH|||  
PEG|Polyethylene glycol|C0032478;C0032483|||C0032483|SNOMEDCT|||  
PEG|Polyethylene glycol (substance)|||C0032483|SNOMEDCT|||  
PEG|Polyethylene glycol product|C0032483|||C0032483|SNOMEDCT|||  
PEG|Polyethylene glycol product (product)|||C0032483|SNOMEDCT|||  
PEG|Polyethylene glycol product (substance)|||C0032483|SNOMEDCT|||  
PEG|Polyethylene glycol, NOS|C0032478;C0032483|||C0032483|SNOMEDCT|||  
PEG|Polyethyleneglycol|C0032478;C0032483|||1|0.0455|  
PEG|Polyethyleneoxide|C0032478;C0032483|||C0032483|MSH;NDFRT|||  
PEG|Polyethyleneoxides|C0032483|||C0032483|MSH|||  
PEG|Polyoxyethylene|C0032483|||C0032483|MSH|||  
PEG|Polyoxyethylenes|C0032483|||C0032483|MSH;NDFRT|||  
PEG|Propan-1, 2-Diol|||C0072225|MSH;NDFRT|||  
PEG|Propylene Glycol|C0072225|||C0072225|MSH;MTHSPL;NCI;NDFRT|||  
PEG|Propylene Glycol [Chemical/Ingredient]|||C0072225|NDFRT|||  
PEG|Propylene glycol|C0072225|||C0072225|LNC;MTH;RXNORM;SNOMEDCT|||  
PEG|Propylene glycol (product)|||C0072225|SNOMEDCT|||  
PEG|Propylene glycol (substance)|||C0072225|SNOMEDCT|||  
PEG|Propylene glycol preparation|C0072225|||C0072225|SNOMEDCT|||  
PEG|endoscopic gastrostomy|C0176751|||C0176751|CHV|||  
PEG|glycol polyethylene|C0032483|||C0032483|CHV|||  
PEG|glycol, polyethylene|C0032478;C0032483|||C0032483|PDQ|||  
PEG|macrogol|C0032483|||C0032483|CHV|||  
PEG|macrogols|C0032483|||C0032483|CHV|||  
PEG|peg|||C0176751|CHV|||  
PEG|peg 400|C0032478|||C0032478|CHV|||  
PEG|peg procedure|C0176751|||C0176751|CHV|||  
PEG|pegylated|||1|0.0044|1  
PEG|percutaneous endoluminal gastrostomy|||1  
PEG|percutaneous endoscopic  
gastrostomy|C0176751|1|1.000|C0176751|MTH;MTHICD9;SNOMEDCT|1|0.2255|1  
PEG|percutaneous endoscopic gastrostomy (PEG)|C0176751|||C0176751|CHV|||  
PEG|percutaneous gastrostomy|C0176751|||C0176751|CHV|||  
PEG|pericyte edema generation|||1  
PEG|pneumoencephalogram|C0032279|||1  
PEG|pneumoencephalography|C0032279|||C0032279|AOD;CHV;CSP;LCH;MSH;SNOMEDCT|1|0.0  
08|  
PEG|pneumonencephalograph|||1  
PEG|pneumonencephalography|||1  
PEG|poly(ethyleneglycol)|||1|0.0068|  
PEG|polyethylene  
glycol|C0032478;C0032483|||C0032478;C0032483|AOD;CHV;CSP;MSH;MTHSPL;NCI;NDFRT;PD  
Q;SNOMEDCT;VANDF|1|0.681|1  
PEG|polyethylene glycol 400|C0032478|||C0032478|CHV|1|0.0044|  
PEG|polyethylene glycol 4000|C0032479|||1|0.0052|  
PEG|polyethylene glycol 6000|C0030775|||1|0.01|  
PEG|polyethylene glycol 8000|C0030776|||1|0.004|  
PEG|polyethylene glycol solution|||1|0.0016|

PEG|polyethylene glycols|C0032483|||C0032483|CHV|||  
PEG|polyethylene oxide|C0032478;C0032483|||C0032483|CHV|||  
PEG|polyethylenglycol|||1|0.0036|  
PEG|polyoxyethylene|C0032483|||C0032483|CHV|||  
PEG|propanediol|C0033437;C0072225|||C0072225|CSP|||  
PEG|propylene glycol|C0072225|||C0072225|CHV;CSP|||  
PEG|propyleneglycol|C0072225|||C0072225|CHV|||  
PE|ACE inhibitor perindopril|||1|0.0014|  
PE|ADAPTIN, BETA-3A|C1412446|||C1412446|OMIM|||  
PE|ADAPTOR-RELATED PROTEIN COMPLEX 3, BETA-1 SUBUNIT|||C1412446|OMIM|||  
PE|ADTB3A|C1412446|||C1412446|HUGO;OMIM|||  
PE|AP3B1|C1412446|||C1412446|HUGO;OMIM|||  
PE|AP3B1 gene|C1412446|||C1412446|HUGO;MTH|||  
PE|CDDP/VP-16|||C0078414|NCI;PDQ|||  
PE|Cephalin|C0031618;C1450468|||C0031618|FMA;SNOMEDCT|||  
PE|Cephalins|C0031618|||C0031618|MSH;NDFRT|||  
PE|Cisplatin/Etoposide|C0078414|||C0078414|NCI|||  
PE|EP|||C0078414|PDQ|||  
PE|Ethanolamine Phosphoglycerides|C0031618|||C0031618|MSH;NDFRT|||  
PE|Ethanolamine phosphoglyceride|C0031618|||C0031618|SNOMEDCT|||  
PE|Ethanolamineglycerophospholipids|C0031618|||C0031618|MSH;NDFRT|||  
PE|Ever told by doctor that you had pulmonary embolus|||C2926590|LNC|||  
PE|Ever told by doctor that you had pulmonary embolus:Find:Pt:^Patient:Ord|||C2926590|LNC|||  
PE|Ever told by doctor that you had pulmonary embolus:Finding:Point in time:^Patient:Ordinal|||C2926590|LNC;MTH|||  
PE|HPS2|||C1412446|HUGO;OMIM|||  
PE|HPS2 GENE|C1412446|||C1412446|OMIM|||  
PE|P-VP protocol|C0078414|||C0078414|MSH|||  
PE|PE|||C0031238;C0031618;C0078414;C1412446;C1744699;C2926590|AOD;LNC;NCI;OMIM;PDQ|||  
PE|PEARL, MOUSE, HOMOLOG OF|||C1412446|OMIM|||  
PE|PER|||C0031238|NCI|||  
PE|PERU|C0031238|||C0031238|NCI|||  
PE|PVp|||C0078414|NCI;PDQ|||  
PE|Pemphigus erythematosus|C0263312|||1|0.0041|  
PE|Peru|C0031238|||C0031238|AOD;CSP;LCH;MSH;MTH;NCI;SNOMEDCT|||  
PE|Peru (geographic location)|||C0031238|SNOMEDCT|||  
PE|Phosphatidyl ethanolamine|C0031618;C1450468|||C0031618|FMA;SNOMEDCT|||  
PE|Phosphatidyl ethanolamine (substance)|||C0031618|SNOMEDCT|||  
PE|Phosphatidylethanolamine|C0031618;C1450468|||C0031618|FMA;LNC|||  
PE|Phosphatidylethanolamines|C0031618|||C0031618|MSH;MTH;NDFRT;RXNORM|||  
PE|Phosphatidylethanolamines [Chemical/Ingredient]|||C0031618|NDFRT|||  
PE|Phosphoethanolamine|C0031618;C0070939|||C0031618|SNOMEDCT|||  
PE|Phosphoglycerides, Ethanolamine|C0031618|||C0031618|MSH|||  
PE|Physical Exam|C0031809;C0804816;C1744699|||C1744699|NCI|||  
PE|Physical Exam Domain|C1744699|||C1744699|MTH;NCI|||  
PE|Proenkephalin|C0072068;C1418457|||1|0.0141|  
PE|Proestrus|C0033274;C2960704|||1|0.0059|  
PE|Pseudo-exfoliation|||1|0.005|  
PE|Pseudomonas exotoxin|||1|0.0518|1|  
PE|PÃ©clet number|||1|  
PE|VP-P chemotherapy protocol|C0078414|||C0078414|CHV|||  
PE|VP-P protocol|C0078414|||C0078414|MSH|||  
PE|VP-Plat|C0078414|||C0078414|NCI;PDQ|||  
PE|VPP|C0078414|||C0078414|NCI;PDQ|||  
PE|adaptor-related protein complex 3, beta 1 subunit|||C1412446|HUGO|||

PE|after phacoemulsification|||||1|0.0027|  
PE|agonist phenylephrine|||||1|0.0268|  
PE|beta-phenylethylamine|C0070559|||C0070559|MSH;SNOMEDCT|1|0.005|  
PE|cephalin|C0031618;C1450468|||C0031618|CHV|||  
PE|cisplatin and etoposide|||||1|0.0064|  
PE|cisplatin and etoposide chemotherapy protocol|||C0078414|CHV|||  
PE|cisplatin etoposide|C0078414|||C0078414|CHV|||  
PE|cisplatin-etoposide|C0078414|||||1|0.0045|  
PE|cisplatin/etoposide|C0078414|||C0078414|PDQ|||  
PE|cisplatin/etoposide protocol|C0078414|||C0078414|MTH|||  
PE|days postexposure|||||1|0.005|  
PE|early promoter|||||1|0.0023|  
PE|elastase|C0030306;C0699918|||||1|0.0086|  
PE|element|C0013879;C1705248|||||1|0.005|  
PE|epithelial cells|C0014597;C1273342;C2699513|||||1|0.0059|  
PE|error positivity|||||1|0.0023|  
PE|errors|C0743559|||||1|0.0059|  
PE|esophageal pressure|C0232531|||||1|0.0027|  
PE|expiratory pressure|||||1|  
PE|extract|C2828366|||||1|0.0254|  
PE|pancreatic extract|||||1|  
PE|panendoscopy|C0679547|||||1|  
PE|paper electrophoresis|C0013861|||C0013861|AOD;CSP;MSH|||1|  
PE|parallel elastic|||||1|  
PE|parasitized erythrocytes|||||1|0.0045|  
PE|parietal endoderm|||||1|0.0095|  
PE|partial epilepsy|C0014547|||C0014547|CHV;MSH;NDFRT;SNOMEDCT|1|0.0032|1|  
PE|pectinesterase|C0070205|||C0070205|MSH;MTH;SNOMEDCT|1|0.0059|  
PE|pectus  
excavatum|C0016842|||C0016842|CHV;COSTAR;DXP;ICD9CM;MSH;NDFRT;OMIM;SNOMEDCT|1|0.0082|  
PE|pedal edema|C0574002|||||1|  
PE|pelvic examination|C0200045|||C0200045|CHV;MSH;MTHICD9;NCI;SNOMEDCT|||1|  
PE|penile erection|C0030847|||C0030847|AOD;CHV;GO;MSH;SNOMEDCT|1|0.0109|1|  
PE|percutaneous endoscopic|||||1|  
PE|pericardial  
effusion|C0031039;C1253937|||C0031039;C1253937|CHV;COSTAR;CST;DXP;MEDLINEPLUS;MSH;MTH;NCI;NDFRT;OMIM;SNOMEDCT;UWDA|1|0.0173|1|  
PE|perindopril|C0136123|||C0136123|CHV;MSH;NCI;NDFRT;RXNORM;SNOMEDCT;USPMG;VANDF|||  
PE|peritoneal exudate|C0003962|||C0003962|CSP|1|0.0218|1|  
PE|periventricular hypothalamic nucleus|C1283308|||||1|0.0027|  
PE|periventricular nucleus|C0003741|||C0003741|FMA|1|0.0041|  
PE|permeability|C0031164|||||1|0.0045|  
PE|persistent estrus|||||1|0.005|  
PE|peru|C0031238|||C0031238|CHV|||  
PE|perus|||C0031238|CHV|||  
PE|perylene|C0031243|||||1|  
PE|petroleum  
ether|C0068407;C0303762|||C0068407;C0303762|AOD;CHV;CSP;MSH;SNOMEDCT|1|0.0059|  
PE|phacoemulsification|C0282545|||C0282545|CHV;MSH;SNOMEDCT|||1|  
PE|pharyngoesophageal|||||1|0.0064|1|  
PE|phase encoding|||||1|  
PE|phenylephrine|C0031469|||C0031469|AOD;CHV;CSP;LNC;MSH;MTHSPL;NCI;NDFRT;RXNORM;SNOMEDCT;USPMG;VANDF|||

PE|phenylephrine  
hydrochloride|C0031470|||C0031470|CHV;MSH;MTHSPL;NCI;NDFRT;RXNORM;SNOMEDCT;USPMG  
;VANDF|||  
PE|phenylethylamine|C0031399|||C0031399|AOD;CHV;CSP|||  
PE|phorbol esters|C0031586|||1|0.0023|  
PE|phosphatidyl ethanolamine|C0031618;C1450468|||C0031618|AOD;CHV|||  
PE|phosphatidyl-ethanolamine|C0031618;C1450468|||1|0.01|  
PE|phosphatidylethanolamine|C0031618;C1450468|||C0031618;C1450468|AOD;CHV;CSP;FM  
A;LNC;MSH;MTH;NCI|||1  
PE|phosphatidylethanolamines|C0031618|||C0031618|CHV|||  
PE|phosphoethanolamine|C0031618;C0070939|||C0031618;C0070939|CHV;LNC;MSH;MTH;SNO  
MEDCT|1|0.0127|  
PE|phosphorylethanolamine|C0070939|||C0070939|MSH|1|0.0082|  
PE|photographic effect|||1|1|  
PE|phycoerythrin|C0031789|||C0031789|CSP;MSH;NDFRT;SNOMEDCT|||1  
PE|physical education|C0031805|||C0031805|CHV;MSH|1|0.0223|1  
PE|physical evaluation|||1|1|1|  
PE|physical  
examination|C0031809|||C0031809|AIR;AOD;AOT;CHV;LNC;MSH;MTH;NCI;SNOMEDCT|1|0.020  
4|1  
PE|physical exercise|C0015259|||C0015259|AOD;CHV;MSH;SNOMEDCT|1|0.0045|1  
PE|physiologic ecology|||1|1|1|  
PE|phytoestrogens|C0071011|||1|0.0041|  
PE|pigment epithelial|||1|0.0073|  
PE|pigment epithelium|C1519082|||C1519082|NCI|1|0.015|1  
PE|pigmented ciliary epithelial|||1|0.0055|  
PE|pigmented epithelial|||1|0.0095|  
PE|pigmented epithelium|C1519082|||C1519082|NCI|1|0.0091|1  
PE|placental extract|C0032048|||C0032048|CHV|||  
PE|plasma epinephrine|||1|0.0036|  
PE|plasma  
exchange|C0032113;C0032134|||C0032113;C0032134|AOD;CHV;MSH;MTH;NCI;PDQ;SNOMEDCT|  
1|0.1608|1  
PE|plasma extravasation|||1|0.0068|  
PE|plating efficiency|||1|0.02|1  
PE|pleiotropic functional defect|||1|1|1|  
PE|pleural  
effusion|C0032227;C1253943|1|0.002|C0032227;C1253943|AOD;CHV;COSTAR;CST;MEDLINEP  
LUS;MSH;NCI;NDFRT;OMIM;SNOMEDCT;UWDA|1|0.0232|1  
PE|pneumatic equalization|||1|1|1|  
PE|point of entry|||1|1|1|  
PE|polychromatic erythrocytes|||1|0.0036|  
PE|polyelectrolyte|||1|0.0059|  
PE|polyethylene|C0032487;C0137914|||C0032487;C0137914|AOD;CHV;CSP;LCH;MSH;MTH;ND  
FRT;SNOMEDCT;VANDF|1|0.105|1  
PE|polynuclear eosinophil|||1|1|1|  
PE|porcine pancreatic endocrine|||1|0.0027|  
PE|portal embolization|||1|1|1|  
PE|portoenterostomy|C0032722|||C0032722|CHV;MSH;SNOMEDCT|1|0.0041|  
PE|post-exposure|||1|0.0077|  
PE|potential energy|C0678538|||C0678538|AOD;NCI|1|0.0059|1  
PE|powdered extract|||1|1|1|  
PE|power of exclusion|||1|0.0041|  
PE|pre-eclampsia|C0032914|||C0032914|CHV;MSH;MTH;NDFRT;SNOMEDCT|1|0.0223|  
PE|precedence effect|C0599694|||C0599694|CSP|1|0.0045|  
PE|prediction error|||1|0.0041|  
PE|preeclampsia|C0032914|||1|0.0468|1

PE|preeclamptic|||||1|0.0073|  
PE|preexcitation|C0032915|||||1|  
PE|pregnenolone|C0033016;C0373704|||||1|0.0045|  
PE|premature  
ejaculation|C0033038|||C0033038|AOD;CHV;COSTAR;ICD9CM;NCI;SNOMEDCT|1|0.0182|1  
PE|preoperative portal embolization|||||1|0.0018|  
PE|prescription error|||||1|  
PE|present examination|||||1|  
PE|pressure equalization||1|0.178|||||1|  
PE|pressure on expiration|||||1|  
PE|prior to exposure|||||1|  
PE|probability of exclusion|||||1|0.005|  
PE|probable error|||||1|  
PE|probe excision|||||1|  
PE|proenkephalin|C0072068;C1418457|||C0072068;C1418457|HUGO;MSH;MTH;OMIM|||  
PE|proestrus|C0033274;C2960704|||C0033274;C2960704|GO;MSH;MTH;SNOMEDCT|||  
PE|proliferative enteritis|||||1|0.0045|  
PE|proliferative enteropathy|||||1|0.0045|  
PE|prolonged exposure|||||1|0.0036|  
PE|prolyl endopeptidase|C0072132;C1418885|||||1|0.0036|  
PE|protective efficacy|||||1|0.005|  
PE|protein excretion|||||1|  
PE|pseudoephedrine|C0033798;C0524257|||C0033798;C0524257|CHV;LNC;MSH;MTH;MTHSPL;  
NCI;NDFRT;RXNORM;SNOMEDCT;VANDF|||  
PE|pseudoexfoliation|||||1|0.0041|  
PE|psychotic event|||||1|  
PE|pulmonary  
edema|C0034063|||C0034063|AOD;CHV;COSTAR;CSP;CST;DXP;LCH;MSH;MTH;NCI;NDFRT;SNOME  
DCT|1|0.0145|1  
PE|pulmonary emboli|||||1|0.0254|  
PE|pulmonary  
embolism|C0034065|||C0034065|CHV;COSTAR;CSP;DXP;ICPC;LCH;MEDLINEPLUS;MSH;MTH;MTH  
ICD9;NCI;NDFRT;OMIM;SNOMEDCT|||1|  
PE|pulmonary  
embolus|C0034065|1|0.816|C0034065|COSTAR;CST;LNC;SNOMEDCT|1|0.0204|1  
PE|pulmonary  
emphysema|C0034067|||C0034067|CHV;MEDLINEPLUS;MSH;MTH;NCI;NDFRT;QMR;SNOMEDCT|1|0  
.0082|1  
PE|pulmonary thromboembolism|C0524702;C2709204|||||1|0.0064|  
PE|push enteroscopy|C0399620|||C0399620|SNOMEDCT|||  
PE|pyramidal eminence|C1186249|||||1|  
PE|pyroelectric|||||1|  
PE|pyrogenic exotoxin|||||1|  
PERRL|PERRL|C2143305|||C2143305|NCI|||  
PERRL|Pupils Equal Round and Reactive to Light Result|C2143305|||C2143305|NCI|||  
PERRL|Pupils Equal, Round and Reactive to Light|||C2143305|NCI|||  
PERRL|pupils equal, round, react to light||1|1.000|||||1|  
PET|Animal, Companion|C0031268|||C0031268|MSH|||  
PET|Animals, Companion|C0031268|||C0031268|MSH|||  
PET|Companion Animal|C0031268|||C0031268|MSH|||  
PET|Companion Animals|C0031268|||C0031268|MSH|||  
PET|FDG-PET|C0032743;C0872169|||C0032743|NCI|||  
PET|Imaging, PET|||C0032743|MTHHH|||  
PET|Medical Imaging, Positron Emission Tomography|C0032743|||C0032743|NCI|||  
PET|PET|C0031268|||C0032743|AOD;NCI|||  
PET|PET - Positron emission tomography|C0032743|||C0032743|SNOMEDCT|||  
PET|PET Scan|C0032743|||C0032743|MSH;NCI|||

PET|PET Scans||||C0032743|MEDLINEPLUS;MSH|||  
PET|PET imaging||||C0032743|SNOMEDCT|||  
PET|PET scan|C0032743|||C0032743|LNC;NCI;PDQ;SNOMEDCT|||  
PET|PET scan, NOS|C0032743|||C0032743|SNOMEDCT|||  
PET|PETT||||C0032743|CSP|||  
PET|POSITRON EMISS TOMOGR||||C0032743|MSH|||  
PET|Parent Effectiveness Training|||||||1  
PET|Peritoneal Equilibration Test|C0430949;C0878801|||||1|0.0272|  
PET|Pet|C0031268|||C0031268|MSH|||  
PET|Pet Animal|C0031268|||C0031268|MTH|||  
PET|Pets|C0031268;C1456682|||C0031268|MSH|||  
PET|Polyethyleneterephthalate|C0032485|||||1|0.002|  
PET|Positron Emission Tomography|C0032743|||C0032743|MSH;NCI|||  
PET|Positron Emission Tomography Scan|C0032743|||C0032743|NCI|||  
PET|Positron emission tomographic imaging|C0032743|||C0032743|SNOMEDCT|||  
PET|Positron emission tomographic imaging -  
action|C0032743|||C0032743|SNOMEDCT|||  
PET|Positron emission tomographic imaging - action (qualifier  
value)||||C0032743|SNOMEDCT|||  
PET|Positron emission tomography|C0032743|||C0032743|HL7V3.0;SNOMEDCT|1|0.8997|  
PET|Positron emission tomography (PET)|C0032743|||C0032743|HL7V2.5|||  
PET|Positron emission tomography (procedure)||||C0032743|SNOMEDCT|||  
PET|Positron emission tomography, NOS|C0032743|||C0032743|SNOMEDCT|||  
PET|Positron-Emission Tomography|C0032743|||C0032743|MSH;MTH;NCI|||  
PET|Professional Employment Test|||||||1  
PET|Scan, PET|C0032743|||C0032743|MSH|||  
PET|Scans, PET||||C0032743|MSH|||  
PET|TOMOGR POSITRON EMISS||||C0032743|MSH|||  
PET|Tomography, Positron Emission|C0032743|||C0032743|MSH|||  
PET|Tomography, Positron-Emission|C0032743|||C0032743|MSH|||  
PET|functional|C0205245;C0542341;C2700217|||||1|0.0016|  
PET|imaging pet|C0032743|||C0032743|CHV|||  
PET|pancreatic endocrine tumor|C0242363|||C0242363|CHV;SNOMEDCT|||  
PET|pancreatic endocrine tumors|||||1|0.0009|  
PET|paraffin-embedded tissue|||||1|0.0017|1  
PET|patulous eustachian tube|C0155434|||||1|0.0008|  
PET|peak ejection time|||||||1  
PET|pear-shaped extension tube|||||||1  
PET|peritoneal equilibration  
test|C0430949;C0878801|||C0430949;C0878801|MTH;MTHICD9;SNOMEDCT|||1  
PET|pet|C0031268|||C0031268;C0032743|CHV;CSP|||  
PET|pet animal|C0031268|||C0031268|CHV|||  
PET|pet imaging||||C0032743|CHV|||  
PET|pet scan|C0032743|||C0032743|CHV|||  
PET|pet scans||||C0032743|CHV|||  
PET|petrolatum|C0031262|||||1|0.0018|  
PET|pets|C0031268;C1456682|||C0031268|CHV|||  
PET|pets (animal)||||C0031268|AOD|||  
PET|phosphatidylethanol|C0070787|||||1|0.0112|  
PET|photoinduced electron transfer|||||1|0.0051|  
PET|polyester|C0032474|||C0032474|CHV;MSH;SNOMEDCT|1|0.0013|  
PET|polyethylene terephthalate|||||1|0.0007|  
PET|polyethylene terephthalate|C0032485|||C0032485|CHV;MSH;NDFRT|1|0.0146|1  
PET|polyethylene tube|||||||1  
PET|poor exercise tolerance|C3149603|||||||1  
PET|positron emission tomograph|||||1|0.0027|  
PET|positron emission tomographic|||||1|0.0262|

PET|positron emission tomography|C0032743|1|1.000|C0032743|AOD;CHV;CSP;HL7V3.0;MSH;NCI;SNOMEDCT|||1  
PET|positron emission tomography scan|C0032743|||C0032743|NCI|||  
PET|positron-emission tomography|C0032743|||C0032743|CHV|||  
PET|positron-emission tomography (PET)|C0032743|||C0032743|CHV|||  
PET|postexposure treatment|||1  
PET|pre-eclamptic toxemia|C0032914|||1|0.0014|  
PET|predominantly epithelial thymoma|||1  
PET|preeclamptic toxemia|C0032914;C2931877|||C2931877|MSH|||1  
PET|pressure equalization tube|||1  
PET|problem elicitation technique|||1  
PET|progressive exercise test|C0430513|||1  
PET|proton magnetic resonance spectroscopic imaging|C0032743;C1522706|||C0032743|NCI|||  
PET|pulmonary endodermal tumor|||1  
PET|treatment|C0039798;C0087111;C1522326;C1533734;C1705169;C3161471|||1|0.0012|  
|  
PFO|patent foramen ovale|C0016522;C2939192|1|1.000|C0016522|CHV;MSH;NCI;NDFRT;OMIM;SNOMEDCT|1|0.8947|1  
PFO|perfluoro-N-octane|C0166273|||1  
PFO|perfluoro-n-octane|C0166273|||1|0.0263|  
PFO|perfluorooctanoate|C2964281|||C2964281|LNC;MSH|||  
PFO|perfringolysin O|C0110119|||1|0.0614|  
PFO|persistent foramen ovale|C1397674|||C1397674|OMIM|||  
PFO|plantar fasciitis orthosis|||1  
PFO|pyruvate|C0034354;C0244104|||1|0.0175|  
PH|1 Chromosome, Ph|C0031526|||C0031526|MSH|||  
PH|1 Chromosomes, Ph|C0031526|||C0031526|MSH|||  
PH|Chromosome, Ph 1|C0031526|||C0031526|MSH|||  
PH|Chromosome, Philadelphia|C0031526|||C0031526|MSH|||  
PH|Chromosomes, Ph 1|C0031526|||C0031526|MSH|||  
PH|Chromosomes, Ph1|C0031526|||C0031526|MSH|||  
PH|Concentration, Hydrogen-Ion|C0020283|||C0020283|MSH|||  
PH|Concentrations, Hydrogen-Ion|C0020283|||C0020283|MSH|||  
PH|Finding of pH|C1304686|||C1304686|MTH;SNOMEDCT|||  
PH|Finding of pH (finding)|||C1304686|SNOMEDCT|||  
PH|H+ concentration|C0020283|||C0020283|SNOMEDCT|||  
PH|H/O: medical history NOS|||C0455458|SNOMEDCT|||  
PH|H/O: medical history NOS (situation)|||C0455458|SNOMEDCT|||  
PH|H<sup>+</sup> concentration|||C0020283|SNOMEDCT|||  
PH|H<sup>+</sup> concentration|C0020283|||C0020283|SNOMEDCT|||  
PH|History of|||C0332119|LNC;SNOMEDCT|||  
PH|History of (situation)|||C0332119|SNOMEDCT|||  
PH|History of - medical history NOS|||C0455458|SNOMEDCT|||  
PH|History of - medical history NOS (context-dependent category)|||C0455458|SNOMEDCT|||  
PH|History of - medical history NOS (situation)|||C0455458|SNOMEDCT|||  
PH|Hydrogen Ion Concentration|C0020283|||C0020283|MSH|||  
PH|Hydrogen ion concentration|C0020283|||C0020283|SNOMEDCT|1|0.0086|  
PH|Hydrogen ion concentration (function)|||C0020283|SNOMEDCT|||  
PH|Hydrogen ion concentration (observable entity)|||C0020283|SNOMEDCT|||  
PH|Hydrogen ion concentration, function (observable entity)|||C0020283|SNOMEDCT|||  
PH|Hydrogen-Ion Concentration|C0020283|||C0020283|MSH;MTH|||  
PH|Hydrogen-Ion Concentrations|C0020283|||C0020283|MSH|||

PH|Hydrogen-ion concentration|C0020283|||C0020283|LCH|||  
PH|Intracellular pH|||1|0.004|  
PH|PAH|||C1418251|HUGO;OMIM|||  
PH|PAH gene|C1418251|||C1418251|HUGO;LNC;MTH|||  
PH|PH|C0020283;C0450407;C0450408;C0450409;C1304686|||C0020283;C0031529;C0031843;  
C0332119;C0455458;C1418251|HUGO;MSH;NCI;SNOMEDCT|||  
PH|PHAA CHROMOSOME|||C0031526|MSH|||  
PH|PHENYLALANINE HYDROXYLASE|C0031456;C1418251|||C1418251|OMIM|||  
PH|PHILIPPINES|C0031529|||C0031529|NCI|||  
PH|PHL|||C0031529|NCI|||  
PH|PHYSIOL|||C0031843|MSH|||  
PH|PMH - past medical history|C0455458|||C0455458|MTH;SNOMEDCT|||  
PH|Past history of|C0332119|||C0332119;C0455458|MTH;SNOMEDCT|||  
PH|Past history of (context-dependent category)|||C0332119|SNOMEDCT|||  
PH|Past history of (situation)|||C0332119|SNOMEDCT|||  
PH|Past medical history|C0262926;C0455458|||C0455458|LNC;SNOMEDCT|||  
PH|Past medical history (situation)|||C0455458|SNOMEDCT|||  
PH|Past medical history of|||C0455458|SNOMEDCT|||  
PH|Past medical history of (contextual qualifier) (context-dependent  
category)|||C0455458|SNOMEDCT|||  
PH|Periventricular heterotopia|C2678104|||1|0.0045|  
PH|Ph|C0020283;C0450407;C0450408;C0450409;C1304686|||C0031526|NCI|||  
PH|Ph 1 Chromosome|C0031526|||C0031526|MSH;NDFRT|||  
PH|Ph 1 Chromosomes|C0031526|||C0031526|MSH|||  
PH|Ph1 Chromosome|C0031526|||C0031526|MSH;NDFRT|||  
PH|Ph1 Chromosomes|C0031526|||C0031526|MSH|||  
PH|Philadelphia|C0031525|||1|0.1647|  
PH|Philadelphia Chromosome|C0031526|||C0031526|MSH;MTH;NCI;NDFRT|||  
PH|Philadelphia Chromosome [Disease/Finding]|||C0031526|NDFRT|||  
PH|Philadelphia chromosome|C0031526|||C0031526|CSP;NCI|1|0.0748|  
PH|Philippines|C0031529|||C0031529|MSH|||  
PH|Philippines|C0031529|||C0031529|AOD;CSP;LCH;MSH;MTH;NCI;SNOMEDCT|||  
PH|Philippines (geographic location)|||C0031529|SNOMEDCT|||  
PH|Phillippines|C0031529|||C0031529|MSH|||  
PH|Phillippines|C0031529|||C0031529|MSH|||  
PH|Pleckstrin homology|||1|0.2602|  
PH|RP|C1538326|||C0031529|NCI|||  
PH|[pH]|C0020283;C0450407;C0450408;C0450409;C1304686|||C0020283|NCI|||  
PH|acidity|C0001128;C0847097;C0920750|||1|0.0081|  
PH|chromosome philadelphia|C0031526|||C0031526|CHV|||  
PH|chromosomes philadelphia|C0031526|||C0031526|CHV|||  
PH|function|C0031843;C0542341;C0700205;C1705273|||C0031843|MSH|||  
PH|health history|C0455458|||C0455458|CHV|||  
PH|history|C0019664;C0019665;C0262512;C0262926;C1705255;C2004062|||1|0.0045|  
PH|hydrochloride|C1512523|||1|0.0066|  
PH|hydrogen ion concentration|C0020283|1|1.000|C0020283|CSP|||1|  
PH|hydrogen-Ion concentration (pH)|||C0020283|CHV|||  
PH|hyperplasia|C0020507|||1|0.0091|  
PH|pH|C0020283;C0450407;C0450408;C0450409;C1304686|||C0020283;C1304686|CSP;HL7V3  
.0;LNC;MSH;MTH;NCI;SNOMEDCT|||  
PH|pH - finding|C1304686|||C1304686|SNOMEDCT|||  
PH|pH level|C1304686|||C1304686|CHV|||  
PH|palmar hyperhidrosis|C1856953|||C1856953|OMIM|1|0.0086|  
PH|parathyroid hormone|C0030520;C1882913|||1|  
PH|parenchymal hematoma|||1|  
PH|parenchymal hemorrhage|C0747264|||1|  
PH|partial hepatectomy|C0193398|||C0193398|ICD9CM;MTH;NCI;SNOMEDCT|||1



PH|primary  
hyperparathyroidism|C0221002|||C0221002|CHV;ICD9CM;MSH;NCI;NDFRT;SNOMEDCT|1|0.0045|1  
PH|primary hypertension|C0085580|||C0085580|AOD;CHV;CSP;NCI;SNOMEDCT|||  
PH|primary hypogonadism|C0022735;C0948896;C1384582|||1  
PH|prolyl 4-hydroxylase|C0033384;C1622631|||1|0.0121|  
PH|prolyl hydroxylase|C0033384|||C0033384|MSH;NDFRT|1|0.0147|  
PH|prolylhydroxylase|C0033384|||1  
PH|proportional hazards|||1|0.0086|  
PH|prostatic hypertrophy|C0005001;C1739363;C2937421|||1  
PH|pseudohermaphroditism|C0033804|||1  
PH|pubic hair|C0221988;C1305636|||1|0.0056|1  
PH|pubic hair stage|C0429608|||C0429608|SNOMEDCT|||  
PH|public  
health|C0034019;C0699943|||C0034019;C0699943;C1552283|AOD;CHV;CSP;HL7V3.0;LCH;LNC;MSH;NCI|1|0.0035|1  
PH|pulmonary arterial  
hypertension|C0152171;C2973725|||C0152171;C2973725|MEDLINEPLUS;MSH;MTH;OMIM|||  
PH|pulmonary  
hemorrhage|C0151701|||C0151701|CHV;CST;MTH;NCI;OMIM;SNOMEDCT|1|0.0106|  
PH|pulmonary  
hypertension|C0020542;C1963220|||C0020542;C1963220|AOD;CHV;COSTAR;CSP;CST;DXP;LCH;MEDLINEPLUS;MSH;MTH;MTHICD9;NCI;NDFRT;OMIM;SNOMEDCT|1|0.2299|1  
PH|pulmonary hypoplasia|C0265783|||C0265783|CHV;OMIM;SNOMEDCT|1|0.0121|  
PH|pulp horn|C0447400|||1  
PH|punctate hemorrhage|||1  
PICC|Long line|C0179740|||C0179740|SNOMEDCT|||  
PICC|PIC line|C0179740|||C0179740|SNOMEDCT|||  
PICC|PICC line|C0179740|||C0179740|SNOMEDCT|||  
PICC|Peripherally inserted central catheter|||C0179740|SNOMEDCT|||  
PICC|Peripherally inserted central catheter (physical object)|C0179740|||C0179740|MTH;SNOMEDCT|||  
PICC|peripherally inserted central catheter||1|1.000||1|1|1|  
PICC|peripherally inserted central catheter (PICC)|||C0179740|CHV|||  
PICC|pic line|C0179740|||C0179740|CHV|||  
PICC|picc|C0179740|||C0179740|CHV|||  
PICC|picc line|C0179740|||C0179740|CHV|||  
PIC|PIC|C0014878;C0522667;C0730321|||C0730321|SNOMEDCT|||  
PIC|Paediatric intensive care|C1627360|||1|0.0389|  
PIC|Personality Inventory for Children|||1|0.0973|1  
PIC|Punctate inner choroiditis|C0730321|||C0730321|SNOMEDCT|||  
PIC|Punctate inner choroidopathy|C0730321|||C0730321|SNOMEDCT|||  
PIC|Punctate inner choroidopathy (disorder)|||C0730321|SNOMEDCT|||  
PIC|complexes|C1704241|||1|0.0506|  
PIC|intracranial pressure|C0021880|||1|0.0272|  
PIC|islet cells|C0022131|||1|0.0195|  
PIC|particle-in-cell|||1|0.0428|  
PIC|pediatric intensive care|C1627360|||C1627360|SNOMEDCT|||  
PIC|penicillin-inhibitor combinations|||1  
PIC|peripherally inserted catheter||1|1.000||1|1|  
PIC|personal injury collision|||1  
PIC|phosphate carrier|||1|0.0506|  
PIC|phosphoinositidase C|C0136864|||1|0.1323|  
PIC|phospholipase C|C0031669|||1|0.035|  
PIC|plasmin-inhibitor complex|||1  
PIC|polymorphism information content|||1|0.3541|  
PIC|polysaccharide-iron complex|C0357080|||1

PIC|posterior intermediate curve|||||||1  
PIC|postinflammatory corticoid|||||||1  
PIC|postintercourse|||||||1  
PIC|preinitiation complex|||||||0.1518|1  
PIC|preinvasive cancer|||||||1  
PIC|punctate inner choroiditis|C0730321|||C0730321|SNOMEDCT|||  
PIC|punctate inner choroidopathy|C0730321|||C0730321|SNOMEDCT|||1  
PID|DISEASE (PID), PELVIC INFLAMMATORY|C0242172|||C0242172|NCI|||  
PID|DISEASE PELVIC INFLAMMATORY|C0242172|||C0242172|CST|||  
PID|DKFZp686F2281|C2985251|||C2985251|NCI|||  
PID|Disease, Inflammatory Pelvic|C0242172|||C0242172|MSH|||  
PID|Disease, Pelvic Inflammatory|C0242172|||C0242172|MSH|||  
PID|Diseases, Inflammatory Pelvic|C0242172|||C0242172|MSH|||  
PID|Diseases, Pelvic Inflammatory|C0242172|||C0242172|MSH|||  
PID|Fem pelv inflam dis NOS|||C0242172|ICD9CM|||  
PID|Female pelvic infection|||C0242172|SNOMEDCT|||  
PID|Female pelvic inflammation|C0242172|||C0242172|SNOMEDCT|||  
PID|Female pelvic inflammatory disease|C0242172|||C0242172|SNOMEDCT|||  
PID|Female pelvic inflammatory disease (disorder)|||C0242172|SNOMEDCT|||  
PID|Female pelvic inflammatory disease NOS|C0242172|||C0242172|SNOMEDCT|||  
PID|Female pelvic inflammatory disease NOS (disorder)|||C0242172|SNOMEDCT|||  
PID|Female pelvic inflammatory diseases NOS|C0242172|||C0242172|SNOMEDCT|||  
PID|Female pelvic inflammatory diseases NOS (disorder)|||C0242172|SNOMEDCT|||  
PID|INFLAMM DIS PELVIC|||C0242172|MSH|||  
PID|INFLAMM PELVIC DIS|||C0242172|MSH|||  
PID|INFLAMMATION PELVIC|||C0242172|CST|||  
PID|INFLAMMATORY DISEASE (PID), PELVIC|C0242172|||C0242172|NCI|||  
PID|INFLAMMATORY DISEASE OF FEMALE PELVIC ORGANS|C0242172|||C0242172|ICD9CM|||  
PID|Inflam. dis.- pelvic|||C0242172|SNOMEDCT|||  
PID|Inflammatory Disease, Pelvic|C0242172|||C0242172|MSH;NDFRT|||  
PID|Inflammatory Diseases, Pelvic|C0242172|||C0242172|MSH|||  
PID|Inflammatory Pelvic Disease|C0242172|||C0242172|MSH;NDFRT|||  
PID|Inflammatory Pelvic Diseases|C0242172|||C0242172|MSH|||  
PID|Inflammatory disease of female pelvic organs AND/OR tissues|||C0242172|SNOMEDCT|||  
PID|Inflammatory disease of female pelvic organs AND/OR tissues (disorder)|||C0242172|SNOMEDCT|||  
PID|Inflammatory disease of female pelvic organs AND/OR tissues [Ambiguous]|||C0242172|SNOMEDCT|||  
PID|Inflammatory disease of female pelvic organs and tissues, NOS|||C0242172|SNOMEDCT|||  
PID|Inflammatory diseases of female pelvic organs|C0242172|||C0242172|CCS|||  
PID|METASTASIS-ASSOCIATED 1-LIKE 1|||C1417406|OMIM|||  
PID|METASTASIS-ASSOCIATED PROTEIN 2|||C1417406|OMIM|||  
PID|MTA1-L1|C1417406|||C1417406|HUGO|||  
PID|MTA1L1|C1417406;C2985251|||C1417406;C2985251|NCI;OMIM|||  
PID|MTA2|C1417406|||C1417406|HUGO;NCI;OMIM|||  
PID|MTA2 Gene|C1417406|||C1417406|NCI|||  
PID|MTA2 gene|C1417406|||C1417406|HUGO;MTH|||  
PID|MTA2 wt Allele|C2985251|||C2985251|MTH;NCI|||  
PID|Metastasis Associated 1 Family, Member 2 Gene|||C1417406|NCI|||  
PID|Metastasis Associated 1 Family, Member 2 wt Allele|||C2985251|NCI|||  
PID|PELVIC DIS INFLAMM|||C0242172|MSH|||  
PID|PELVIC INFLAMM DIS|||C0242172|MSH|||  
PID|PELVIC INFLAMMATION|C0242172|||C0242172|CST|||  
PID|PELVIC INFLAMMATORY DISEASE|C0242172|||C0242172|COSTAR;CST;DXP;NCI|||  
PID|PELVIC INFLAMMATORY DISEASE, (PID)|C0242172|||C0242172|NCI|||

PID|PID|C0242172;C1417406;C2985251|||C0242172;C1417406;C2985251|CSP;DXP;MEDLINEPLUS;MTHICD9;NCI;OMIM;SNOMEDCT|||

PID|PID - pelvic inflammatory disease|C0242172|||C0242172|SNOMEDCT|||

PID|PID, PELVIC INFLAMMATORY DISEASE|C0242172|||C0242172|NCI|||

PID|Pain intensity difference|||1|0.0231|

PID|Pelvic Disease, Inflammatory|C0242172|||C0242172|MSH;NDFRT|||

PID|Pelvic Diseases, Inflammatory|C0242172|||C0242172|MSH|||

PID|Pelvic Infection|C0030790;C0242172|||C0242172|NCI|||

PID|Pelvic Inflammatory Disease|C0242172|||C0242172|MEDLINEPLUS;MSH;MTH;NCI;NDFRT|||

PID|Pelvic Inflammatory Disease [Disease/Finding]|||C0242172|NDFRT|||

PID|Pelvic Inflammatory Diseases|C0242172|||C0242172|MSH|||

PID|Pelvic infection|C0030790;C0242172|||C0242172|NCI|||

PID|Pelvic inflam. disease NOS|||C0242172|SNOMEDCT|||

PID|Pelvic inflammatory disease|C0242172|||C0242172|ICPC;MTHICD9;SNOMEDCT|||

PID|Pelvic inflammatory disease (PID)|C0242172|||C0242172|CCS|||

PID|Pelvic inflammatory disease NOS|C0242172|||C0242172|SNOMEDCT|||

PID|Unspecified inflammatory disease of female pelvic organs and tissues|||C0242172|ICD9CM|||

PID|[X]Inflammatory diseases of female pelvic organs|||C0242172|SNOMEDCT|||

PID|[X]Inflammatory diseases of female pelvic organs (disorder)|||C0242172|SNOMEDCT|||

PID|inflammatory pelvic disease|C0242172|||C0242172|CHV|||

PID|metastasis associated 1 family, member 2|||C1417406|HUGO|||

PID|pain intensity difference|||1|

PID|pelvic inflammation|C0242172|||C0242172|CHV|||

PID|pelvic inflammatory disease|C0242172|1|1.000|C0242172|CHV;COSTAR;CSP;CST;DXP;ICPC;MEDLINEPLUS;MSH;MTH;MTHICD9;NCI;NDFRT;SNOMEDCT|1|0.7821|1

PID|pelvic inflammatory disease (PID)|C0242172|||C0242172|CHV|||

PID|pelvic inflammatory diseases|C0242172|||C0242172|CHV|||

PID|phosphotyrosine interaction domain|||1|0.006|

PID|photoionization detector|||1|0.009|1

PID|pid|C0242172;C1417406;C2985251|||C0242172|CHV|||

PID|plasma iron disappearance|||1|

PID|position-indicating device|||1|

PID|post-inertia dyskinesia|||1|

PID|post-inoculation day|||1|0.0171|

PID|postinoculation day|||1|0.1034|

PID|preimplantation diagnosis|C0086142|||1|0.006|1

PID|primary immunodeficiencies|||1|0.011|

PID|primary immunodeficiency|C0398686;C2984310|||C0398686;C2984310|CHV;NCI;SNOMEDCT|||1

PID|primary immunodeficiency diseases|||1|0.008|

PID|prolapsed intervertebral disc|C0242362|||1|

PID|proportional-integral-derivative|||1|0.0341|1

PID|protruded intervertebral disc|||1|

PIH|PIF|||C0033373|OMIM;SNOMEDCT|||

PIH|PIF preparation|C0033373|||C0033373|SNOMEDCT|||

PIH|PIH|C0033373;C1418570|||C0033373;C1418570|AOD;HUGO|||

PIH|PIH gene|C1418570|||C1418570|HUGO;MTH|||

PIH|PRIH|||C0033373|MSH|||

PIH|PROLACTIN RELEASE INHIB HORMONE|||C0033373|MSH|||

PIH|PROLACTIN RELEASE-INHIBITING FACTOR|C0033373|||C0033373|OMIM|||

PIH|Prolactin Release Inhibiting Factors|C0033373|||C0033373|MSH|||

PIH|Prolactin Release Inhibiting Hormone|C0033373|||C0033373|MSH;NDFRT|||

PIH|Prolactin Release Inhibitory Factor|||C0033373|MSH|||

PIH|Prolactin Release-Inhibiting Factors|C0033373|||C0033373|MSH;NDFRT|||  
PIH|Prolactin Release-Inhibiting Factors  
[Chemical/Ingredient]|||C0033373|NDFRT|||  
PIH|Prolactin Release-Inhibiting Hormone|C0033373|||C0033373|MSH;MTH;NDFRT|||  
PIH|Prolactin Release-Inhibitory Factor|||C0033373|MSH;NDFRT|||  
PIH|Prolactin inhibiting factor|C0033373|||C0033373|SNOMEDCT|||  
PIH|Prolactin inhibiting factor (substance)|||C0033373|SNOMEDCT|||  
PIH|Prolactin inhibiting factor preparation|C0033373|||C0033373|SNOMEDCT|||  
PIH|Prolactin inhibiting factor preparation (product)|||C0033373|SNOMEDCT|||  
PIH|Prolactin inhibiting factor preparation (substance)|||C0033373|SNOMEDCT|||  
PIH|pif|||C0033373|CHV|||  
PIH|pih|C0033373;C1418570|||C0033373|CHV|||  
PIH|postinflammatory hyperpigmentation|C0333616|||C0333616|MTH;SNOMEDCT|||  
PIH|postinjection hours|||1|0.0163|  
PIH|postinoculation hour|||1|0.0163|  
PIH|pregnancy-induced  
hypertension|C0340274|1|1.000|C0340274|CHV;MSH;SNOMEDCT|1|0.8442|1  
PIH|pregnancy-induced hypertension (pre-eclampsia, eclampsia, toxemia of  
pregnancy included)|||C1418570|HUGO|||  
PIH|preventricular intraventricular hemorrhage|||1  
PIH|primary intracerebral hemorrhage|||1  
PIH|prolactin IH|C0033373|||C0033373|AOD|||  
PIH|prolactin inhibiting factor|C0033373|||C0033373|CSP|||  
PIH|prolactin inhibiting hormone|C0033373|||1  
PIH|prolactin release- inhibiting hormone (PIH)|C0033373|||C0033373|CHV|||  
PIH|prolactin release-inhibiting factor (PIF)|C0033373|||C0033373|CHV|||  
PIH|prolactin-inhibiting hormone|C0033373|||C0033373|AOD|||  
PIH|prolactin-release-inhibiting hormone|C0033373|||C0033373|AOD|||  
PIH|pseudointimal hyperplasia|||1  
PIH|pyridoxal isonicotinoyl hydrazone|C0072702|||C0072702|MSH|1|0.1233|  
PIP|GCDFFP-15|C1144261;C1418587;C2985149|||C1418587|HUGO;OMIM|||  
PIP|GCDFFP15|C1418587;C2985149|||C1418587|HUGO|||  
PIP|GPIP4|C1418587;C2985149|||C1418587|HUGO|||  
PIP|GROSS CYSTIC DISEASE FLUID PROTEIN|C1418587|||C1418587|OMIM|||  
PIP|MP/MTX/VCR|||C0279391|NCI;PDQ|||  
PIP|Mercaptopurine/Methotrexate/Vincristine|C0279391|||C0279391|NCI|||  
PIP|PIP|C0279391;C1418587|||C0279391;C1418587|HUGO;NCI;OMIM;PDQ|||  
PIP|PIP Gene|C1418587|||C1418587|NCI|||  
PIP|PIP gene|C1418587|||C1418587|HUGO;MTH|||  
PIP|PROLACTIN-INDUCIBLE PROTEIN|C1144261;C1418587|||C1418587|OMIM|||  
PIP|Piperacillin|C0031955|||1|0.0549|  
PIP|Prolactin-Induced Protein Gene|||C1418587|NCI|||  
PIP|Psychotic Inpatient Profile|||1  
PIP|carboxy-terminal propeptide of procollagen type I|||1|0.0102|  
PIP|mercaptopurine/methotrexate/vincristine|C0279391|||C0279391|MTH;PDQ|||  
PIP|paraffin immunoperoxidase|||1  
PIP|paralytic infantile paralysis|||1  
PIP|peak inflation pressure|||1  
PIP|peak inflation pressures|||1|0.0203|  
PIP|peak inspiratory pressure|C0232021|1|0.034|C0232021|SNOMEDCT|1|0.3293|1  
PIP|personal injury protection|||1  
PIP|phosphatidylinositol monophosphate|||1|0.0224|  
PIP|phosphatidylinositol phosphate|C0071655|||C0071655|AOD|1|0.061|  
PIP|piperacillin|C0031955|||C0031955|CHV;LCH;LNC;MSH;MTH;NCI;NDFRT;RXNORM;SNOMED  
CT;USPMG;VANDF|||  
PIP|piperidine|C0031959|||C0031959|AOD;CHV;CSP;LCH;MSH;SNOMEDCT|||  
PIP|plasma cell interstitial pneumonitis|||1

PIP|positive inspiratory pressure||1|0.002|||||1  
PIP|posterior interphalangeal|||||||1  
PIP|postictal psychosis|||||||1  
PIP|postinflammatory polyposis|||||||1  
PIP|postinfusion phlebitis|||||||1  
PIP|postinspiratory pressure|||||||1  
PIP|pressure inversion point|||||||1  
PIP|prevention of immune precipitation|||||1|0.0142|  
PIP|probable intrauterine pregnancy|||||||1  
PIP|prolactin inducible protein|C1144261;C1418587|||||||1  
PIP|prolactin-induced protein|||C1418587|HUGO|||  
PIP|prolactin-inducible  
protein|C1144261;C1418587|||C1144261;C1418587|HUGO;NCI;OMIM|1|0.0285|  
PIP|proline iminopeptidase|C0243766|||C0243766|MSH;MTH;SNOMEDCT|||  
PIP|prostatic inhibin peptide|C1457875|||C1457875|MSH|1|0.0183|  
PIP|proximal interphalangeal||1|0.964||1|0.4004|1  
PIP|proximal interphalangeal joint|C0932508|||||1|0.0407|  
PIP|psychosis, intermittent hyponatremia, polydipsia|||||||1  
PIP|pulmonary immaturity of prematurity|||||||1  
PIP|pulmonary insufficiency of the premature|||||||1  
PKU|Classical Phenylketonuria|C0751434|||C0751434|MSH|||  
PKU|Classical Phenylketonurias|C0751434|||C0751434|MSH|||  
PKU|Classical phenylketonuria|C0751434|||C0751434|MTH;SNOMEDCT|||  
PKU|Classical phenylketonuria (disorder)|||C0751434|SNOMEDCT|||  
PKU|DEFIC DIS PHENYLALANINE HYDROXYLASE|||C0751434|MSH|||  
PKU|DEFIC DIS PHENYLALANINE HYDROXYLASE SEVERE|||C0751434|MSH|||  
PKU|Deficiencies, Phenylalanine Hydroxylase|C0751434|||C0751434|MSH|||  
PKU|Deficiency Disease, Phenylalanine Hydroxylase|C0751434|||C0751434|MSH|||  
PKU|Deficiency Disease, Phenylalanine Hydroxylase,  
Severe|C0751434|||C0751434|MSH|||  
PKU|Deficiency, Phenylalanine Hydroxylase|C0751434|||C0751434|MSH|||  
PKU|Disease, Folling|C0751434|||C0751434|MSH|||  
PKU|Disease, Folling's|C0751434|||C0751434|MSH|||  
PKU|Diseases, Folling|C0751434|||C0751434|MSH|||  
PKU|FOELLING SYNDROME|C0751434|||C0751434|DXP|||  
PKU|FOLLING DIS|||C0751434|MSH|||  
PKU|FOLLING DISEASE|C0751434|||C0751434|OMIM|||  
PKU|FOLLINGS DIS|||C0751434|MSH|||  
PKU|Folling Disease|C0751434|||C0751434|MSH|||  
PKU|Folling Diseases|C0751434|||C0751434|MSH|||  
PKU|Folling's Disease|C0751434|||C0751434|MSH|||  
PKU|Folling's syndrome|C0751434|||C0751434|SNOMEDCT|||  
PKU|HYPERPHENYLALANINEMIA TYPE I|C0751434|||C0751434|DXP|||  
PKU|Hydroxylase Deficiencies, Phenylalanine|C0751434|||C0751434|MSH|||  
PKU|Hydroxylase Deficiency, Phenylalanine|C0751434|||C0751434|MSH|||  
PKU|Hyperphenylalaninaemia, type I|C0751434|||C0751434|SNOMEDCT|||  
PKU|Hyperphenylalaninemia, type I|C0751434|||C0751434|SNOMEDCT|||  
PKU|Imbecilitus phenylpyruvica|C0751434|||C0751434|SNOMEDCT|||  
PKU|OLIGOPHRENIA PHENYLPYRUVICA|C0751434|||C0751434|OMIM|||  
PKU|OLIGOPHRENIA, PHENYLPYRUVIC|C0751434|||C0751434|DXP|||  
PKU|Oligophrenia Phenylpyruvica|C0751434|||C0751434|MSH|||  
PKU|Oligophrenia Phenylpyruvicas|C0751434|||C0751434|MSH|||  
PKU|Oligophrenia phenylpyruvica|C0751434|||C0751434|SNOMEDCT|||  
PKU|PAH - Phenylalanine hydroxylase deficiency|C0751434|||C0751434|SNOMEDCT|||  
PKU|PAH DEFICIENCY|C0751434|||C0751434|OMIM|||  
PKU|PAH deficiency|C0751434|||C0751434|SNOMEDCT|||  
PKU|PHENYLALANINE HYDROXYLASE DEFIC DIS|||C0751434|MSH|||

PKU|PHENYLALANINE HYDROXYLASE DEFIC DIS SEVERE||||C0751434|MSH|||  
PKU|PHENYLALANINE HYDROXYLASE DEFICIENCY|C0751434|||C0751434|OMIM|||  
PKU|PHENYLKETONURIA|C0031485;C0751434;C2720373|||C0031485;C0751434|CST;DXP;OMIM|  
||  
PKU|PHENYLKETOURIA|C0031485|||C0031485|CST|||  
PKU|PKU|C0031485;C0751434|||C0031485;C0751434|CHV;CSP;DXP;MEDLINEPLUS;MSH;MTH;MT  
HICD9;NCI;OMIM;SNOMEDCT|||  
PKU|PKU - Phenylketonuria|C0031485;C0751434|||C0751434|SNOMEDCT|||  
PKU|PKU1 - Phenylketonuria|C0751434|||C0751434|SNOMEDCT|||  
PKU|Phenylalanine Hydroxylase Deficiencies|C0751434|||C0751434|MSH|||  
PKU|Phenylalanine Hydroxylase Deficiency|C0751434|||C0751434|MSH|||  
PKU|Phenylalanine Hydroxylase Deficiency Disease|C0751434|||C0751434|MSH|||  
PKU|Phenylalanine Hydroxylase Deficiency Disease,  
Severe|C0751434|||C0751434|MSH|||  
PKU|Phenylalanine hydroxylase deficiency|C0751434|||C0751434|OMIM;SNOMEDCT|||  
PKU|Phenylalanine hydroxylase deficiency (disorder)|||C0751434|SNOMEDCT|||  
PKU|Phenylketonuria|C0031485;C0751434;C2720373|||C0031485;C0751434|LCH;LNC;MEDLI  
NEPLUS;MSH;MTHICD9;NCI;NDFRT;SNOMEDCT|||  
PKU|Phenylketonuria (disorder)|||C0031485|SNOMEDCT|||  
PKU|Phenylketonuria - pku|C0031485|||C0031485|ICD9CM|||  
PKU|Phenylketonuria I|C0751434|||C0751434|MSH|||  
PKU|Phenylketonuria Is|||C0751434|MSH|||  
PKU|Phenylketonuria [PKU]|C0031485;C0751434;C2720373|||C0031485|ICD9CM|||  
PKU|Phenylketonuria, Classical|C0751434|||C0751434|MSH|||  
PKU|Phenylketonuria, NOS|C0031485;C0751434;C2720373|||C0751434|SNOMEDCT|||  
PKU|Phenylketonurias|C0031485|||C0031485|MSH;MTH;NDFRT|||  
PKU|Phenylketonurias [Disease/Finding]|||C0031485|NDFRT|||  
PKU|Phenylketonurias, Classical|C0751434|||C0751434|MSH|||  
PKU|Phenylpyruvic Oligophrenia|C0751434|||C0751434|MTH|||  
PKU|Phenylpyruvic oligophrenia|C0751434|||C0751434|SNOMEDCT|||  
PKU|Phenylpyruvica, Oligophrenia|C0751434|||C0751434|MSH|||  
PKU|Phenylpyruvicas, Oligophrenia|C0751434|||C0751434|MSH|||  
PKU|Severe phenylalanine hydroxylase deficiency|C0751434|||C0751434|SNOMEDCT|||  
PKU|phenylalaninemia|C0031485|||C0031485|CHV;CSP|||  
PKU|phenylketonuria|C0031485;C0751434;C2720373|1|1.000|C0031485;C0751434;C272037  
3|AOD;CHV;CSP;CST;DXP;LCH;LNC;MEDLINEPLUS;MSH;MTHICD9;NCI;NDFRT;OMIM;SNOMEDCT|1|  
0.9616|1  
PKU|phenylketonuria (PKU)|C0031485;C0751434;C2720373|||C0031485;C0751434|CHV|||  
PKU|phenylketonurias|C0031485|||C0031485|CHV|||  
PKU|phenylketonuric|||||1|0.0384|  
PKU|phenylketouria|C0031485|||C0031485|CHV|||  
PKU|phenylpyruvic oligophrenia|C0751434|||C0751434|CSP|||  
PKU|pku phenylketonuria|C0031485;C0751434|||C0031485|CHV|||  
PMD|ANOPHTHALMIA AND PULMONARY HYPOPLASIA|C1832661|||C1832661|MTH|||  
PMD|ANOPHTHALMIA, CLINICAL, WITH MILD FACIAL DYSMORPHISM AND VARIABLE  
MALFORMATIONS OF THE LUNG, HEART, AND DIAPHRAGM|||C1832661|OMIM|||  
PMD|ANOPHTHALMIA/MICROPHTHALMIA AND PULMONARY HYPOPLASIA|||C1832661|OMIM|||  
PMD|Anophthalmia with pulmonary hypoplasia|C1832661|||C1832661|MSH|||  
PMD|HLD1|C0205711|||C0205711|OMIM|||  
PMD|LEUKODYSTROPHY, HYPOMYELINATING, 1|C0205711|||C0205711|OMIM|||  
PMD|Leukodystrophy, sudanophilic|C0007795;C0205711|||C0205711|MTHICD9|||  
PMD|MATTHEW-WOOD SYNDROME|C1832661|||C1832661|OMIM|||  
PMD|MCOPS9|C1832661|||C1832661|OMIM|||  
PMD|MICROPHTHALMIA, SYNDROMIC 9|C1832661|||C1832661|OMIM|||  
PMD|MMPL|C2698697|||C2698697|NCI|||  
PMD|Matthew Wood syndrome|C1832661|||C1832661|MSH|||  
PMD|Matthew-Wood syndrome|C1832661|||C1832661|MSH|||

PMD|PELIZAEUS MERZBACHER DIS||||C0205711|MSH|||  
PMD|PELIZAEUS-MERZBACHER DISEASE|C0205711;C1418654|||C0205711|OMIM|||  
PMD|PLP||||C2698697|NCI|||  
PMD|PLP/DM20||||C2698697|NCI|||  
PMD|PLP1 wt Allele|C2698697|||C2698697|MTH;NCI|||  
PMD|PMD|C0205711;C1832661;C2698697|||C0205711;C1832661;C2698697|NCI;OMIM|||  
PMD|PULMONARY AGENESIS, MICROPTHALMIA, AND DIAPHRAGMATIC  
DEFECT||||C1832661|OMIM|||  
PMD|Pelizaeus Merzbacher Disease|C0205711;C1418654|||C0205711|MSH|||  
PMD|Pelizaeus Merzbacher brain sclerosis|C0205711|||C0205711|CSP|||  
PMD|Pelizaeus Merzbacher disease|C0205711;C1418654|||C0205711|CSP|||  
PMD|Pelizaeus-Merzbacher Disease|C0205711;C1418654|||C0205711|MSH;MTH;NDFRT|||  
PMD|Pelizaeus-Merzbacher Disease [Disease/Finding]||||C0205711|NDFRT|||  
PMD|Pelizaeus-Merzbacher  
disease|C0205711;C1418654|||C0205711|MTHICD9;SNOMEDCT|1|0.4417|  
PMD|Pelizaeus-Merzbacher disease (disorder)||||C0205711|SNOMEDCT|||  
PMD|Proteolipid Protein 1 (Pelizaeus-Merzbacher Disease, Spastic Paraplegia 2,  
Uncomplicated) wt Allele||||C2698697|NCI|||  
PMD|Pulmonary agenesis, Microphthalmia, and Diaphragmatic  
defect||||C1832661|MSH|||  
PMD|SPEAR SYNDROME||||C1832661|OMIM|||  
PMD|SPG2|C1839264;C2698697|||C2698697|NCI|||  
PMD|Sudanophilic leukodystrophy|C0007795;C0205711|||C0205711|SNOMEDCT|||  
PMD|dorsal premotor|||||1|0.0485|  
PMD|dorsal premotor area|||||1|0.0437|  
PMD|dorsal premotor cortex|||||1|0.1602|  
PMD|papillary muscle dysfunction|C0149957|||||1|  
PMD|pelizaeus merzbacher disease|C0205711;C1418654|||C0205711|CHV|||  
PMD|pelizaeus-merzbacher disease|C0205711;C1418654|||C0205711|CHV|||  
PMD|pellucid marginal degeneration|||||1|0.0388|  
PMD|perceptual motor development|C0679018|||||1|  
PMD|piecemeal degranulation|||||1|0.0825|1|  
PMD|polarization mode dispersion|||||1|0.0631|  
PMD|posterior mandibular depth|||||1|  
PMD|primary medical doctor||1|1.000|||  
PMD|primary myocardial disease|C0033141|||C0033141|MSH|||1|  
PMD|private medical doctor|||||1|  
PMD|programmed multiple development|||||1|  
PMD|progressive muscular dystrophy|C0026850|||C0026850|CHV;SNOMEDCT|1|0.1214|1|  
PMD|sudanophilic leukodystrophy|C0007795;C0205711|||C0205711|CHV|||  
PMI|MANNOSEPHOSPHATE ISOMERASE|C0024744;C1417244|||C1417244|OMIM|||  
PMI|MPI|C0663932;C1417244|||C1417244|HUGO;OMIM|||  
PMI|MPI gene|C1417244|||C1417244|HUGO;MTH|||  
PMI|PHOSPHOMANNOSE ISOMERASE 1|C1417244|||C1417244|OMIM|||  
PMI|PM1|C0456957;C1823304|||C1823304|HUGO|||  
PMI|PMI|C1417244;C1823304|||C1417244;C1823304|HUGO;OMIM|||  
PMI|PMI1|C1417244|||C1417244|OMIM|||  
PMI|Pain Management Index|||||1|0.0678|1|  
PMI|TMEM11|C1823304|||C1823304|HUGO|||  
PMI|TMEM11 gene|C1823304|||C1823304|HUGO;MTH|||  
PMI|mannose phosphate isomerase|C0024744;C1417244|||C1417244|HUGO|||  
PMI|mannose-6-phosphate isomerase|C0024744;C1417244|||C1417244|HUGO|||  
PMI|past medical illness|||||1|  
PMI|patient medical instruction|||||1|  
PMI|patient medication instruction|||||1|  
PMI|patient medicine instruction|||||1|  
PMI|perioperative myocardial infarct|||||1|

PMI|perioperative myocardial infarction|||||1|0.3107|1  
PMI|petition of mental illness|||||||1  
PMI|phosphomannose isomerase|C0024744|||||1|0.2316|1  
PMI|plea of mental incompetence|||||||1  
PMI|point of maximal impulse||1|1.000|||||1  
PMI|posterior myocardial infarct|||||||1  
PMI|posterior myocardial infarction|C0340319|||C0340319|CHV;NCI||||1  
PMI|postmortem interval|||||1|0.3898|1  
PMI|postmyocardial infarct|||||||1  
PMI|postmyocardial infarction|||||||1  
PMI|present medical illness|||||||1  
PMI|previous medical illness|||||||1  
PMI|transmembrane protein 11|C1823304|||C1823304|HUGO|||  
PM|(11beta-21-[4-[4-[bis(2-chloroethyl)amino]phenyl]-1-oxobutoxy]-11,17-  
dihydroxypregna-1,4-diene-3,20-dione)|||C0032949|NCI|||  
PM|11beta,17,21-trihydroxypregna-1,4-diene-3,20-dione 21-[4-[p-[bis(3-  
chloroethyl)amino]phenyl]butyrate]|||C0032949|NCI|||  
PM|Attomole per Microliter|C0439284|||C0439284|NCI|||  
PM|BASIC SALIVARY PROLINE-RICH PROTEIN, BstNI TYPE,  
1|C1418866|||C1418866|OMIM|||  
PM|CON2|C1418866|||C1418866|OMIM|||  
PM|Chlorambucil Prednisolone Ester|C0032949|||C0032949|NCI|||  
PM|Every afternoon at institution specified times|||C1550750|MTH|||  
PM|Femtomole per Milliliter|C0439284|||C0439284|NCI|||  
PM|Femtomole per milliliter|C0439284|||C0439284|SNOMEDCT|||  
PM|Femtomole per millilitre|C0439284|||C0439284|SNOMEDCT|||  
PM|Miquelon and Saint Pierre|||C0038111|MSH|||  
PM|Miquelon and St. Pierre|||C0038111|MSH|||  
PM|Nanomole per Cubic Meter|C0439284|||C0439284|NCI|||  
PM|PA|C0031833|||C0030266|NCI|||  
PM|PAN|C0085999|||C0030266|NCI|||  
PM|PANAMA|C0030266|||C0030266|NCI|||  
PM|PAROTID MIDDLE BAND PROTEIN|C1867051|||C1867051|MTH;OMIM|||  
PM|PM|||C0030266;C0032949;C0038111;C1418866;C1550750|HL7V3.0;HUGO;NCI;PDQ|||  
PM|PMF|C1418866;C1868201|||C1418866|HUGO|||  
PM|PMS|C0033046;C1418866;C1868117|||C1418866|HUGO|||  
PM|PRB1|C0599575;C1418866;C1419295;C2984536|||C1418866|HUGO;OMIM|||  
PM|PRB1 gene|C1418866|||C1418866|HUGO;MTH|||  
PM|PRB1L|C1418866|||C1418866|HUGO|||  
PM|PRB1M|C1418866|||C1418866|HUGO|||  
PM|PREDNIMUSTINE|C0032949|||C0032949|NCI|||  
PM|PROLINE-RICH PROTEIN, BstNI SUBFAMILY, 1|C1418866|||C1418866|OMIM|||  
PM|Palatal myoclonus|C0030214|||||1|0.0044|  
PM|Panama|C0030266|||C0030266|AOD;CSP;LCH;MSH;MTH;NCI;SNOMEDCT|||  
PM|Panama (geographic location)|||C0030266|SNOMEDCT|||  
PM|Pasteurella multocida|C0030637|||||1|0.0073|  
PM|Periodontal mechanosensitive|||||1|0.0044|  
PM|Picometer|C2347516|||C2347516|MTH;NCI|||  
PM|Picomole per Liter|C0439284|||C0439284|MTH;NCI|||  
PM|Picomole/Liter|||C0439284|NCI|||  
PM|Plasmodium malariae|C0032153|||||1  
PM|Pm|||C1867051|OMIM|||  
PM|PmF|C1418866;C1868201|||C1418866|OMIM|||  
PM|PmS|C0033046;C1418866;C1868117|||C1418866|OMIM|||  
PM|Prednimustine|C0032949|||C0032949|MSH;MTH;NCI;NDFRT;RXNORM|||  
PM|Prednimustine [Chemical/Ingredient]|||C0032949|NDFRT|||

PM|Pregna-1,4-diene-3,20-dione, 21-(4-(4-(bis(2-chloroethyl)amino)phenyl)-1-oxobutoxy)-11,17-dihydroxy-, (11beta)-|||C0032949|MSH;NDFRT|||  
PM|Psychological Mindedness|||1|0.0049|  
PM|SAINT PIERRE AND MIQUELON|||C0038111|NCI|||  
PM|SB|||C0038111|NCI|||  
PM|SPM|C2986827|||C0038111|NCI|||  
PM|Saint Pierre and Miquelon|||C0038111|MSH;MTH;NCI|||  
PM|St. Pierre and Miquelon|||C0038111|MSH|||  
PM|Yoctomole per Picoliter|C0439284|||C0439284|NCI|||  
PM|Zeptomole per Nanoliter|C0439284|||C0439284|NCI|||  
PM|after death|||1|  
PM|afternoon|C0439550|1|0.846|||1|  
PM|amol/mcL|||C0439284|NCI|||  
PM|amol/uL|||C0439284|NCI|||  
PM|evening|C0587117|||1|  
PM|fmol/mL|||C0439284|NCI;SNOMEDCT|||  
PM|intrapulmonary metastasis|||1|0.0029|  
PM|medial pulvinar|||1|0.0053|  
PM|method|C0025663;C0449851;C0871511|||1|0.0044|  
PM|monocytes|C0026473;C0200637|||1|0.0044|  
PM|mouth pressure|||1|0.015|  
PM|nmol/m3|||C0439284|NCI|||  
PM|pM|||C0439284|SNOMEDCT|||  
PM|pacemaker|C0030163;C1546728|||C0030163;C1546728|CHV;COSTAR;CSP;HL7V2.5;NCI|1|0.0471|1|  
PM|pagetoid melanocytosis|||1|  
PM|panama|C0030266|||C0030266|CHV|||  
PM|papillae mammae|||1|  
PM|papillary  
muscle|C0030352;C1281066|||C0030352;C1281066|CHV;CSP;FMA;MSH;NCI;SNOMEDCT;UWDA|1|0.0291|1|  
PM|papular mucinosis|C0263390|||1|  
PM|paraspinal mapping|||1|  
PM|partial  
mastectomy|C0024885;C0851238|||C0024885;C0851238|CHV;COSTAR;MSH;NCI;SNOMEDCT|||  
PM|partial meniscectomy|||1|  
PM|partial mole|C0334529|||C0334529|NCI;SNOMEDCT|1|0.0044|  
PM|partially muscular|||1|  
PM|particulate matter|C1720884|||C1720884|MSH|1|0.2028|1|  
PM|pathologic myopia|C1417579|||C1417579|HUGO|||  
PM|patients with polymyositis|||1|0.0199|  
PM|pectinate muscle|C0225854|||C0225854|CHV;FMA|||  
PM|pectoralis  
major|C0224340;C0585574|||C0224340;C0585574|CHV;FMA;NCI;SNOMEDCT;UWDA|1|0.0223|1|  
PM|perfect match|||1|0.0039|  
PM|perinatal morbidity|C0848215|||1|  
PM|perinatal  
mortality|C0031062;C0701826|||C0031062;C0701826|AOD;CHV;ICPC;MSH;SNOMEDCT|1|0.0044|1|  
PM|periodontal membrane|C0031093|||1|  
PM|peritoneal macrophage|C0206190|||C0206190|CHV;FMA;MSH;NCI|||1|  
PM|peritoneal macrophages|C0206190|||1|0.0791|  
PM|peritoneal mesothelioma|C1377610|||C1377610|MTH;NCI|1|0.0024|  
PM|peritrophic matrix|||1|0.0097|  
PM|permethrin|C0070455;C1446695|||C0070455;C1446695|CHV;MSH;MTH;MTHSPL;NCI;NDFRT;RXNORM;SNOMEDCT;USPMG;VANDF|||  
PM|petit mal|C0014553|||1|



PM|protein methylesterase|C0072376|||||1  
PM|psammomatous meningioma|C0334607|||||1  
PM|psaos  
major|C0224419;C1305045|||C0224419;C1305045|CHV;FMA;NCI;SNOMEDCT;UWDA|1|0.0092|  
PM|pterygoid muscle|C0034001;C1280264|||||1  
PM|puberal macromastia|||||1  
PM|pulmonary macrophage|C0085236|||C0085236|MSH|||1  
PM|pulmonary macrophages|C0085236|||||1|0.0121|  
PM|pulmonary metastases|C0153676|||||1|0.0068|  
PM|pulmonary metastasis|C0153676|||C0153676|CHV;SNOMEDCT|||  
PM|pulpomesial|||||1  
PM|puromycin|C0034145|||C0034145|CSP;LCH;MSH;NCI;NDFRT|1|0.0058|  
PM|purple membrane|C0034149|||C0034149|MSH|||  
PM|pyogenic meningitis|C0302869|||||1|0.0024|  
PM|pyridoxamine|C0034268|||C0034268|AOD;CSP;MSH;NDFRT;SNOMEDCT|1|0.0184|  
PM|ymol/pL||||C0439284|NCI|||  
PM|zmol/nL||||C0439284|NCI|||  
PND|ANF||||C1417807|OMIM|||  
PND|ANP||||C1417807|OMIM|||  
PND|ATRIAL NATRIURETIC FACTOR|C0027481;C1417807|||C1417807|OMIM|||  
PND|ATRIAL NATRIURETIC POLYPEPTIDES|C1417807|||C1417807|OMIM|||  
PND|ATRIONATRIURETIC FACTOR|C1417807|||C1417807|OMIM|||  
PND|ATRIOPEPTIN|C0027481;C0201900|||C1417807|OMIM|||  
PND|CARDIONATRIN|C1417807|||C1417807|OMIM|||  
PND|DYSPNEA, NOCTURNAL PAROXYSMAL|C1956415|||C1956415|DXP|||  
PND|Dyspnea Paroxysmal Nocturnal|C0013405;C1956415|||C1956415|NCI;QMR|||  
PND|Dyspnea, Paroxysmal|C0013405|||C0013405|MSH;MTH;NDFRT|||  
PND|Dyspnea, Paroxysmal Nocturnal|C0013405;C1956415|||C1956415|MSH|||  
PND|Dyspnea, Paroxysmal [Disease/Finding]||||C0013405|NDFRT|||  
PND|Dyspneas, Paroxysmal|C0013405|||C0013405|MSH|||  
PND|NATRIURETIC PEPTIDE PRECURSOR A||||C1417807|OMIM|||  
PND|NPPA|C0068273;C1417807|||C1417807|HUGO;OMIM|||  
PND|NPPA gene|C1417807|||C1417807|HUGO;MTH|||  
PND|PAROXYSMAL NOCTURNAL DYSPNEA|C0013405;C1956415|||C1956415|COSTAR|||  
PND|PND|C0013405;C1417807;C1956415|||C1417807;C1956415|DXP;OMIM|||  
PND|PND - Paroxysmal nocturnal dyspnea||||C1956415|SNOMEDCT|||  
PND|PND - Paroxysmal nocturnal dyspnoea||||C1956415|SNOMEDCT|||  
PND|PRONATRIODILATIN|C0052649;C1417807|||C1417807|OMIM|||  
PND|Paroxysmal Dyspnea|C0013405|||C0013405|MSH|||  
PND|Paroxysmal Dyspneas|C0013405|||C0013405|MSH|||  
PND|Paroxysmal dyspnea|C0013405|||C0013405|SNOMEDCT|||  
PND|Paroxysmal dyspnea (finding)||||C0013405|SNOMEDCT|||  
PND|Paroxysmal dyspnoea|C0013405|||C0013405|SNOMEDCT|||  
PND|Paroxysmal nocturnal dyspnea|C0013405;C1956415|||C1956415|MTH;SNOMEDCT|||  
PND|Paroxysmal nocturnal dyspnea (finding)||||C1956415|SNOMEDCT|||  
PND|Paroxysmal nocturnal dyspnoea|C0013405;C1956415|||C1956415|SNOMEDCT|||  
PND|Paroxysmal nocturnal dyspnoea (finding)||||C1956415|SNOMEDCT|||  
PND|Postnatal depression|C0221074|||||1|0.0346|  
PND|cardiac asthma|C0013405;C1956414|||C0013405|CHV|||  
PND|dyspnea nocturnal paroxysmal|C0013405|||C0013405|CHV|||  
PND|dyspnea paroxysmal||||C0013405|CHV|||  
PND|dyspnea paroxysmal nocturnal|C0013405;C1956415|||C0013405|CHV|||  
PND|dyspnoea paroxysmal nocturnal|C0013405;C1956415|||C0013405|CHV|||  
PND|natriuretic peptide A||||C1417807|HUGO|||  
PND|nipple discharge|C0149741|||||1|0.0062|  
PND|paroxysmal dyspnea|C0013405|||C0013405|CHV|||

PND|paroxysmal nocturnal  
dyspnea|C0013405;C1956415|1|0.998|C0013405;C1956415|CHV;COSTAR;MTH;SNOMEDCT|||1  
PND|paroxysmal nocturnal dyspnea pnd|C0013405|||C0013405|CHV|||  
PND|paroxysmal nocturnal dyspnoea|C0013405;C1956415|||C0013405|CHV|||  
PND|partial neck dissection|||1  
PND|pelvic node dissection|||1  
PND|phrenic nerve discharge|||1|0.0087|  
PND|pnd|C0013405;C1417807;C1956415|||C0013405|CHV|||  
PND|pnds|C0013405|||C0013405|CHV|||  
PND|postnasal drainage||1|0.002|||1  
PND|postnasal drip|C0032781|||C0032781|CHV;COSTAR;CST;ICD9CM;NCI;SNOMEDCT|||  
PND|postnatal day|||1|0.8121|  
PND|postnatal depression|C0221074|||C0221074|CHV;CSP;MSH;NDFRT;SNOMEDCT|||1  
PND|postneonatal death|C1272076|||1  
PND|pregnancy, not delivered|C0549206|||1  
PND|prenatal diagnosis|C0033053|||1|0.068|  
PND|principal neutralizing determinant|||1|0.0457|  
PND|principal neutralizing domain|||1|0.0247|  
PND|purulent nasal drainage|||1  
PND|pyronaridine|C0072768|||C0072768|MSH;NCI|||  
PNT|PNT|C1518963;C2347617|||C1518963|NCI|||  
PNT|Percutaneous Neuromodulation Therapy|C1518963|||C1518963|NCI|||  
PNT|paroxysmal nodal tachycardia|C0546960|||1  
PNT|partial nodular transformation|||1  
PNT|percutaneous nephrostomy tube|C1979960|1|1.000|||1  
PNT|percutaneous neuromodulatory therapy|||1  
PNT|pneumotachograph|C0182334|||1|1|  
PO|Activity intolerance risk|C0150009|||C0150009|LNC;SNOMEDCT|||  
PO|At risk for activity intolerance|C0150009|||C0150009|MTH;SNOMEDCT|||  
PO|At risk for activity intolerance (finding)|||C0150009|SNOMEDCT|||  
PO|At risk for cognitive impairment|C0231393|||C0231393|MTH;SNOMEDCT|||  
PO|At risk for cognitive impairment (finding)|||C0231393|SNOMEDCT|||  
PO|At risk for deficient fluid volume|C0150032|||C0150032|MTH;SNOMEDCT|||  
PO|At risk for deficient fluid volume (finding)|||C0150032|SNOMEDCT|||  
PO|At risk for deficient parenting|C0231416|||C0231416|MTH;SNOMEDCT|||  
PO|At risk for deficient parenting (finding)|||C0231416|SNOMEDCT|||  
PO|At risk for imbalanced body temperature|C0231359|||C0231359|MTH;SNOMEDCT|||  
PO|At risk for imbalanced body temperature (finding)|||C0231359|SNOMEDCT|||  
PO|At risk for impaired parenting|C0231416|||C0231416|SNOMEDCT|||  
PO|At risk for impaired skin integrity|C0231357|||C0231357|MTH;SNOMEDCT|||  
PO|At risk for impaired skin integrity (finding)|||C0231357|SNOMEDCT|||  
PO|At risk for infection|C0582147|||C0582147|SNOMEDCT|||  
PO|At risk for infection (finding)|||C0582147|SNOMEDCT|||  
PO|At risk for injury|C0582456|||C0582456|SNOMEDCT|||  
PO|At risk for injury (finding)|||C0582456|SNOMEDCT|||  
PO|At risk for joint contractures|C0231379|||C0231379|MTH;SNOMEDCT|||  
PO|At risk for joint contractures (finding)|||C0231379|SNOMEDCT|||  
PO|At risk for poisoning injury|C0150061|||C0150061|MTH;SNOMEDCT|||  
PO|At risk for poisoning injury (finding)|||C0150061|SNOMEDCT|||  
PO|At risk for skin ulceration|C0231357|||C0231357|SNOMEDCT|||  
PO|At risk for suffocation|C0150082|||C0150082|MTH;SNOMEDCT|||  
PO|At risk for suffocation (finding)|||C0150082|SNOMEDCT|||  
PO|At risk for suffocation [dup] (finding)|||C0150082|SNOMEDCT|||  
PO|At risk for trauma|C0582456|||C0582456|SNOMEDCT|||  
PO|At risk for violence|C0231418|||C0231418|MTH;SNOMEDCT|||  
PO|At risk for violence (finding)|||C0231418|SNOMEDCT|||  
PO|At risk of infection|C0582147|||C0582147|MTH;SNOMEDCT|||

PO|At risk of infection (finding)|||C0582147|SNOMEDCT|||  
PO|At risk of injury|C0582456||C0582456|MTH;SNOMEDCT|||  
PO|At risk of injury (finding)|||C0582456|SNOMEDCT|||  
PO|At risk to skin ulceration|C0231357||C0231357|SNOMEDCT|||  
PO|By mouth|C1527415||C1527415|SNOMEDCT|||  
PO|Fluid volume deficit risk|C0150032||C0150032|LNC;SNOMEDCT|||  
PO|Infection risk|C0582147||C0582147|LNC|||  
PO|Injury risk|C0582456||C0582456|LNC;SNOMEDCT|||  
PO|Maximum isometric tetanic force|||||1|0.0064|  
PO|ORAL|C0442027||C1527415|NCI|||  
PO|Oral|C0442027||C0442027;C1527415|HL7V2.5;MTH;NCI;SNOMEDCT|||  
PO|Oral (qualifier value)|||C0442027|SNOMEDCT|||  
PO|Oral Route of Administration|C1527415||C1527415|NCI|||  
PO|Oral Route of Drug administration|C1527415||C1527415|MTH|||  
PO|Oral route|C0205531;C1527415||C1527415|SNOMEDCT|||  
PO|Oral route (qualifier value)|||C1527415|SNOMEDCT|||  
PO|Oral use|C1527415||C1527415|SNOMEDCT|||  
PO|OralRoute|C1527415||C1527415|HL7V3.0|||  
PO|Orally|C0442027||C0442027;C1527415|NCI;SNOMEDCT|||  
PO|PO|C0442027||C0032344;C0032729;C0442027;C1446409;C1527415|LNC;MSH;NCI|||  
PO|PO - Oral|||C0442027|SNOMEDCT|||  
PO|PO - Per os|C1527415||C1527415|SNOMEDCT|||  
PO|POIS|||C0032344|MSH|||  
PO|PORTUGAL|C0032729||C0032729|NCI|||  
PO|PRT|C0020687;C0032729;C1152182||C0032729|NCI|||  
PO|PT|||C0032729|NCI|||  
PO|Per Os|C1527415||C1527415|NCI|||  
PO|Per oral route|C1527415||C1527415|SNOMEDCT|||  
PO|Per os|C1527415||C1527415|SNOMEDCT|||  
PO|Perceptual Organization|||||1|0.0056|  
PO|Peroral route|C1527415||C1527415|SNOMEDCT|||  
PO|Personality Organization|||||1|0.0048|  
PO|Phenol oxidase|C0041484|||||1|0.0088|  
PO|Plasmodium ovale|C0320744|||||1|  
PO|Po|C0442027||C0150009;C0150032;C0150061;C0150082;C0231357;C0231359;C0231379;  
C0231393;C0231416;C0231418;C0582147;C0582456|SNOMEDCT|||  
PO|Poisoning aspects|C0032344||C0032344|MTH|||  
PO|Poisoning risk|C0150061||C0150061|LNC;SNOMEDCT|||  
PO|Portugal|C0032729||C0032729|AOD;LCH;MSH;MTH;NCI;SNOMEDCT|||  
PO|Portugal (geographic location)|||C0032729|SNOMEDCT|||  
PO|Positive|C0439178;C1446409;C1514241;C2825490||C1446409|MTH;NCI;SNOMEDCT|||  
PO|Positive (qualifier value)|||C1446409|SNOMEDCT|||  
PO|Positive for|||C1446409|SNOMEDCT|||  
PO|Posterior group of thalamic nuclei|||||1|0.008|  
PO|Potential activity intolerance|C0150009||C0150009|SNOMEDCT|||  
PO|Potential alteration in body temperature|C0231359||C0231359|SNOMEDCT|||  
PO|Potential alteration in parenting|C0231416||C0231416|SNOMEDCT|||  
PO|Potential cognitive impairment|C0231393||C0231393|SNOMEDCT|||  
PO|Potential fluid volume deficit|C0150032||C0150032|SNOMEDCT|||  
PO|Potential for cognitive impairment|C0231393||C0231393|SNOMEDCT|||  
PO|Potential for infection|C0582147||C0582147|SNOMEDCT|||  
PO|Potential for injury (trauma)|||C0582456|SNOMEDCT|||  
PO|Potential for joint contractures|C0231379||C0231379|SNOMEDCT|||  
PO|Potential for poisoning|C0150061||C0150061|SNOMEDCT|||  
PO|Potential for skin breakdown|C0231357||C0231357|SNOMEDCT|||  
PO|Potential for suffocation|C0150082||C0150082|SNOMEDCT|||  
PO|Potential for violence|C0231418||C0231418|SNOMEDCT|||

PO|Potential impairment of skin integrity|C0231357|||C0231357|SNOMEDCT|||  
PO|Potential joint contractures|C0231379|||C0231379|SNOMEDCT|||  
PO|Potential skin breakdown|C0231357|||C0231357|SNOMEDCT|||  
PO|Pulse oximetry|C0034108|||1|0.0088|  
PO|Risk for altered body temperature|C0231359|||C0231359|SNOMEDCT|||  
PO|Ruled in|||C1446409|SNOMEDCT|||  
PO|Skin at risk of breakdown|||C0231357|SNOMEDCT|||  
PO|Skin at risk of breakdown (finding)|||C0231357|SNOMEDCT|||  
PO|Skin integrity at risk|||C0231357|SNOMEDCT|||  
PO|Skin integrity impairment risk|C0231357|||C0231357|LNC;SNOMEDCT|||  
PO|Suffocation risk|C0150082|||C0150082|LNC;SNOMEDCT|||  
PO|Trauma risk|C0582456|||C0582456|LNC;SNOMEDCT|||  
PO|Violence risk|C0231418|||C0231418|LNC;SNOMEDCT|||  
PO|Vulnerable to skin tissue breakdown|C0231357|||C0231357|SNOMEDCT|||  
PO|administered|C1521801|||1|0.0072|  
PO|at risk of injury|C0582456|||C0582456|CHV|||  
PO|by mouth|C1527415|1|0.998|C1527415|CHV|||1  
PO|day of birth|||1|0.0096|  
PO|granulosa cells of preovulatory|||1|0.0032|  
PO|infection risk|C0582147|||C0582147|CHV|||  
PO|infection risks|C0582147|||C0582147|CHV|||  
PO|infections risk|||C0582147|CHV|||  
PO|injuries risk|||C0582456|CHV|||  
PO|injury risk|C0582456|||C0582456|CHV|||  
PO|injury risks|||C0582456|CHV|||  
PO|maximum isometric force|||1|0.0072|  
PO|maximum isometric tension|||1|0.008|  
PO|open probability|||1|0.2158|  
PO|opening pressure|||1|  
PO|oral|C0442027|||C0442027|AOD;CHV;NCI|||  
PO|oral administration|C0001563|||1|0.0128|  
PO|oral gavage|||1|0.0112|  
PO|oral route|C0205531;C1527415|||C1527415|CHV|||  
PO|oral use|C1527415|||C1527415|CHV|||  
PO|orally|C0442027|||1|0.1295|  
PO|palm oil|C0069962|||1|0.02|  
PO|paraoxon|C0030480|||C0030480|LNC;MSH;NDFRT;SNOMEDCT|1|0.012|  
PO|parapineal organ|||1|  
PO|parietal operculum|C0228265|||C0228265|FMA;MTH;SNOMEDCT|||1  
PO|parieto-occipital|||1|0.0072|  
PO|parietooccipital|||1|  
PO|peanut oil|C0052300|||C0052300|CHV;MSH;NCI;NDFRT;SNOMEDCT;VANDF|1|0.0088|  
PO|per oral|C1527415|||C1527415|CHV|||  
PO|per os|C1527415|||C1527415|CHV|1|0.0576|1  
PO|perceptual organization|||1|  
PO|period of onset|C0458004|||C0458004|SNOMEDCT|||1  
PO|perioperative|C1518988;C1552246|||C1518988;C1552246|HL7V3.0;MTH;NCI|||1  
PO|periosteum|C0031110|||1|  
PO|peroral|||1|0.024|  
PO|perorally|||1|0.012|  
PO|peroxidase|C0027021;C0031179;C1318719|||C0027021;C0031179;C1318719|CHV;CSP;LC  
H;LNC;MSH;MTH;NDFRT;SNOMEDCT|1|0.0488|  
PO|phenoloxidase|C0041484|||C0041484|CHV;MSH;NDFRT|1|0.0536|  
PO|phone order|||1|  
PO|phosphodiester|C0599124|||C0599124|CSP|1|0.0336|  
PO|physician only|||1|  
PO|poise|C1551084;C2937256|||1|

PO|poisoning|C0032343;C0032344|||C0032344|MSH|||  
PO|polonium|C0032390|||1  
PO|polyolefin|C0950546|||C0950546|MSH;SNOMEDCT|1|0.0072|  
PO|porion|C2346418|||1  
PO|portugal|C0032729|||C0032729|CHV|||  
PO|positive|C0439178;C1446409;C1514241;C2825490|||C1446409|CHV|||  
PO|positive for|||C1446409|CHV|||  
PO|post box|C1550717;C2698859|1|0.002|||  
PO|posterior|C0205095|||C0205095;C0751438|CHV;CST;FMA;HL7V2.5;NCI;SNOMEDCT;UWDA|1|0.0184|1  
PO|posterior complex|||1|0.0048|  
PO|posterior nuclear group|||1|0.0096|  
PO|posterior nucleus|||1|0.0064|  
PO|postoperative|C0032790|||C0032790|CHV;NCI;SNOMEDCT|1|0.0344|1  
PO|postoperatively|||1|0.0112|1  
PO|power output|C0445194|||C0445194|CHV;SNOMEDCT|1|0.0528|  
PO|predominating organism|||1  
PO|preoptic area|C0033063|||C0033063|AOD;CSP;FMA;MSH;SNOMEDCT|1|0.0088|  
PO|pressure|C0033095;C0460139;C1306345|||1|0.0248|  
PO|principal olive|||1|0.0128|  
PO|probability of being open|||1|0.0056|  
PO|probability of channel opening|||1|0.008|  
PO|probability of opening|||1|0.0048|  
PO|probability of the channel being open|||1|0.004|  
PO|progesterone|C0033308;C2757070|||1|0.0128|  
PO|prophylactic oophorectomy|C2945703|||C2945703|CHV;NCI|||1  
PO|propylene oxide|C0072229|||C0072229|MSH;NCI;SNOMEDCT|||  
PO|prostate only|||1|0.004|  
PO|protein oxidation|C1159301|||C1159301|GO|1|0.0096|  
PO|pulse oximeter|C0182109|||1  
PO|pulse oximetry|C0034108|||C0034108|CHV;LNC;MSH;NCI;SNOMEDCT|||1  
PO|punctal occlusion|C0395275|||1  
PO|risk for infection|C0582147|||C0582147|CHV|||  
PO|risk injury|C0582456|||C0582456|CHV|||  
PO|risk injury for|||C0582456|CHV|||  
PO|rule|C0805874;C0870077;C1446409|||C1446409|CHV|||  
PO|ruled|C1446409|||C1446409|CHV|||  
PO|ruling|C1446409|||C1446409|CHV|||  
PO|rulings|C1446409|||C1446409|CHV|||  
PO|tetanic tension|||1|0.036|  
PO|use oral|||C1527415|CHV|||  
PPD|ARTHROPATHY, PROGRESSIVE PSEUDORHEUMATOID, OF CHILDHOOD|||C0432215|OMIM|||  
PPD|Argonaute2|C1414333;C2827477|||C2827477|NCI|||  
PPD|Arthropathy, progressive pseudorheumatoid, of childhood|||C0432215|MSH|||  
PPD|Eukaryotic Translation Initiation Factor 2C 2|C2827477|||C2827477|NCI|||  
PPD|Eukaryotic Translation Initiation Factor 2C2|C2827477|||C2827477|NCI|||  
PPD|PAZ Piwi Domain Protein|C2827477|||C2827477|NCI|||  
PPD|PPAC|C0432215|||C0432215|OMIM|||  
PPD|PPD|C0034131|||C0034131;C0432215;C1421473;C1552732;C2827477|CHV;HUGO;MSH;NCI;NDFRT;OMIM;SNOMEDCT|||  
PPD|PPD - Purified protein derivative - S|C0034131|||C0034131|SNOMEDCT|||  
PPD|PPD-S|C0034131|||C0034131|MSH;NDFRT|||  
PPD|PROGRESSIVE PSEUDORHEUMATOID ARTHROPATHY OF CHILDHOOD|C0432215|||C0432215|OMIM|||  
PPD|PROGRESSIVE PSEUDORHEUMATOID DYSPLASIA|C0432215|||C0432215|OMIM|||  
PPD|Paired-pulse depression|||1|0.0424|

PPD|Parametric Probability  
Distribution|C1552662;C1552732|||C1552732|HL7V3.0;NCI|||  
PPD|Parametric Probability Distribution - DataType|C1552732|||C1552732|MTH|||  
PPD|Progressive pseudorheumatoid arthropathy of  
childhood|C0432215|||C0432215|MSH|||  
PPD|Progressive pseudorheumatoid  
dysplasia|C0432215|||C0432215|MSH;MTH;SNOMEDCT|||  
PPD|Progressive pseudorheumatoid dysplasia (disorder)|||C0432215|SNOMEDCT|||  
PPD|Protein Argonaute-2|C2827477|||C2827477|MTH;NCI|||  
PPD|Protein Slicer|C2827477|||C2827477|NCI|||  
PPD|Purified Protein Derivative|C0034131|||C0034131|NCI|||  
PPD|Purified Protein Derivative of  
Tuberculin|C0034131|||C0034131|MSH;MTH;NDFRT;RXNORM|||  
PPD|Purified Protein Derivative of Tuberculin  
[Chemical/Ingredient]|||C0034131|NDFRT|||  
PPD|Purified protein derivative|C0034131|||C0034131|SNOMEDCT|||  
PPD|Purified protein derivative (product)|||C0034131|SNOMEDCT|||  
PPD|Purified protein derivative (substance)|||C0034131|SNOMEDCT|||  
PPD|Purified protein derivative - S|C0034131|||C0034131|SNOMEDCT|||  
PPD|Purified protein derivative - S (substance)|||C0034131|SNOMEDCT|||  
PPD|RETINAL INNER NUCLEAR LAYER HOMEBOX|C1421473|||C1421473|OMIM|||  
PPD|RINX|C1421473|||C1421473|OMIM|||  
PPD|SED1-PA|C0432215|||C0432215|MSH;OMIM|||  
PPD|SPONDYLOEPIPHYSEAL DYSPLASIA TARDA WITH PROGRESSIVE  
ARTHROPATHY|C0432215|||C0432215|OMIM|||  
PPD|Spondyloepiphyseal dysplasia tarda with progressive  
arthropathy|C0432215|||C0432215|MSH|||  
PPD|TUBERCULIN, PURIFIED PROTEIN DERIVATIVE|C0034131|||C0034131|NDFRT;VANDF|||  
PPD|Tuberculin|C0034131;C0041289;C1532464|||C0034131|SNOMEDCT|||  
PPD|Tuberculin PPD|C0034131|||C0034131|SNOMEDCT|||  
PPD|Tuberculin purified protein derivative|C0034131|||C0034131|SNOMEDCT|||  
PPD|Tuberculin purified protein derivative (product)|||C0034131|SNOMEDCT|||  
PPD|Tuberculin purified protein derivative (substance)|||C0034131|SNOMEDCT|||  
PPD|VISUAL SYSTEM HOMEBOX GENE 1, ZEBRAFISH, HOMOLOG OF|||C1421473|OMIM|||  
PPD|VSX1|C1421473|||C1421473|HUGO;OMIM|||  
PPD|VSX1 gene|C1421473|||C1421473|HUGO;MTH|||  
PPD|derivative protein purified|||C0034131|CHV|||  
PPD|eIF-2C 2|C2827477|||C2827477|NCI|||  
PPD|eIF2C 2|C2827477|||C2827477|NCI|||  
PPD|eIF2C2|C1414333;C2827477|||C2827477|NCI|||  
PPD|hAgo2|C2827477|||C2827477|NCI|||  
PPD|p-phenylenediamine|C0048678|||1|0.0238|  
PPD|packs per day|||1|  
PPD|para-phenylenediamine|C0048678|||1|0.0216|  
PPD|paraphenylenediamine|C0048678|||C0048678|CHV;MSH;NDFRT;SNOMEDCT;VANDF|1|0.01  
86|1  
PPD|percussion and postural drainage|||1|  
PPD|permanent partial disability|||1|  
PPD|photodynamic diagnosis|||1|  
PPD|pinch-point density|||1|  
PPD|pocket probing depth|||1|0.0149|  
PPD|posterior polymorphous dystrophy|||1|0.006|1  
PPD|postpartum day|||1|0.0045|1  
PPD|postpartum  
depression|C0221074|||C0221074|CHV;CSP;MEDLINEPLUS;MSH;NCI;NDFRT;SNOMEDCT|1|0.03  
43|1  
PPD|postprandial|C0376674|||1|

PPD|ppd's|C0034131|||C0034131|CHV|||  
PPD|ppds|C0034131|||C0034131|CHV|||  
PPD|preaxial polydactyly|C0345354|||C0345354|OMIM;SNOMEDCT|||  
PPD|prepared|||1  
PPD|preprodynorphin|C0071827|||C0071827|MSH;SNOMEDCT|1|0.0335|  
PPD|primary peritoneal drainage|||1  
PPD|primary physical dependence|||1  
PPD|probing pocket depth|||1|0.0827|1  
PPD|progressive perceptive deafness|||1  
PPD|progressive pseudorheumatoid  
dysplasia|C0432215|||C0432215|MSH;MTH;OMIM;SNOMEDCT|||  
PPD|progressive pulmonary dystrophy|||1  
PPD|proximal pars distalis|||1|0.029|  
PPD|purified protein  
derivative|C0034131|1|1.000|C0034131|CHV;NCI;SNOMEDCT|1|0.6694|1  
PPD|purified protein derivative from tuberculin|||1|0.0022|  
PPD|purified protein derivative of Mycobacterium tuberculosis|||1|0.0104|  
PPD|pylorus-sparing pancreaticoduodenectomy|C1293563|||1  
PPD|tuberculin purified protein derivative|C0034131|||C0034131|MTHSPL|||  
PPD|tuberculin skin test|C0041290|||1|0.0067|  
PPD|visual system homeobox 1|C1421473|||C1421473|HUGO|||  
PPI|Inhibitors, Proton Pump|C0358591;C1384478|||C0358591|MSH|||  
PPI|PPI|C0358591;C0871125|||C0358591;C0871125|GO;NCI|||  
PPI|Patient Package Insert|||1|0.0073|  
PPI|Plan-Position-Indication|||1  
PPI|Proton Pump Inhibitor|C0358591|||C0358591|NCI;NDFRT|||  
PPI|Proton Pump Inhibitor [EPC]|C0358591|||C0358591|NDFRT|||  
PPI|Proton Pump Inhibitors|C0358591;C1384478|||C0358591|LNC;MSH;MTH;USPMG|||  
PPI|Proton pump inhibitor|C0358591|||C0358591|SNOMEDCT|||  
PPI|Proton pump inhibitor (product)|||C0358591|SNOMEDCT|||  
PPI|Proton pump inhibitor (substance)|||C0358591|SNOMEDCT|||  
PPI|Proton pump inhibitors|C0358591;C1384478|||C0358591|SNOMEDCT|||  
PPI|Psychopathic Personality Inventory|||1|0.0073|1  
PPI|inhibitor proton pump|C0358591|||C0358591|CHV|||  
PPI|inhibitors proton pump|C0358591|||C0358591|CHV|||  
PPI|inorganic pyrophosphate|||1|0.1057|1  
PPI|paired-pulse index|||1|0.0082|  
PPI|partial permanent impairment|||1  
PPI|patient package insert|||1  
PPI|peptidyl prolyl cis-trans isomerase|C0136073;C1414624|||1|0.0046|  
PPI|permanent pacemaker insertion|C2924511;C2926072|||1  
PPI|phosphoinositide|C0031621|||1|0.0237|  
PPI|polyphosphoinositide|C0071655|||C0071655|AOD;MSH;NDFRT|1|0.0629|  
PPI|polypropyleneimine|C1100475|||C1100475|MSH|||  
PPI|post pacing interval|||1  
PPI|postpartum interval|||1|0.0055|  
PPI|pre-pulse inhibition|C0871125|||C0871125|GO|||  
PPI|preceding preparatory interval|||1  
PPI|preproinsulin|C0071928|||C0071928|MSH|1|0.01|  
PPI|prepulse inhibition|C0871125|||C0871125|GO|1|0.4111|1  
PPI|prepulse inhibition activity|C0871125|||C0871125|MTH|||  
PPI|prepulse inhibition of acoustic startle|||1|0.01|  
PPI|present pain intensity|||1|0.0301|1  
PPI|protein-protein interaction|C0872079|||C0872079|NCI|1|0.0064|  
PPI|proton pump  
inhibitor|C0358591|1|0.998|C0358591|CHV;NCI;NDFRT;SNOMEDCT|1|0.289|1  
PPI|proton pump inhibitors|C0358591;C1384478|||C0358591|CHV|||

PPI|psychophysiological insomnia|C0751250|||C0751250|MSH;MTHICD9|||  
PPI|pulse polio immunization|||||1|0.0064|  
PPI|purified pork insulin|||||1|0.0119|  
PPT|CLN1|C1418854;C1850451|||C1418854|HUGO|||  
PPT|INCL|C0268281;C1418854|||C1418854|HUGO|||  
PPT|PALMITOYL-PROTEIN THIOESTERASE|C0380804;C1418854|||C1418854|OMIM|||  
PPT|PALMITOYL-PROTEIN THIOESTERASE 1|C0917464;C1418854|||C1418854|OMIM|||  
PPT|PAP|C0523444|||C2266415|GO|||  
PPT|PPT|C1153596;C1418854;C1551050;C2266415|||C1153596;C1418854;C2266415|GO;OMIM  
|||  
PPT|PPT1|C1418854|||C1418854|HUGO;OMIM|||  
PPT|PPT1 gene|C1418854|||C1418854|HUGO;LNC;MTH|||  
PPT|Part per Thousand|C1551050|||C1551050|MTH;NCI|||  
PPT|Physical Performance Test|C0679543|||||1|0.0628|1  
PPT|Platelet production time|||||1|0.013|  
PPT|ceroid-lipofuscinosis, neuronal 1,  
infantile|C1418854;C2931673|||C1418854|HUGO|||  
PPT|palmitoyl-protein  
thioesterase|C0380804;C1418854|||C0380804;C1418854|MSH;OMIM;SNOMEDCT|1|0.0866|  
PPT|palmitoyl-protein thioesterase 1|C0917464;C1418854|||C1418854|HUGO|||  
PPT|parietal pleural tissue|||||1|  
PPT|part per trillion|C1551051|||||1|  
PPT|partial prothrombin time|C0853653|1|1.000|C0853653|CHV|||1  
PPT|parts per thousand|C1551050|||C1551050|HL7V3.0|||  
PPT|parts per trillion|C1551051|||||1|0.0844|  
PPT|paw pressure threshold|||||1|0.013|  
PPT|peak-to-peak threshold|||||1|  
PPT|pedunculopontine tegmental|||||1|0.0325|  
PPT|pedunculopontine tegmental nucleus|C0262306|||C0262306|FMA;MSH|1|0.0671|  
PPT|pedunculopontine tegmentum|C0872242|||C0872242|CSP|1|0.0281|  
PPT|person, place, and time|||||1|  
PPT|phosphinothricin|C0070815|||C0070815|MSH|1|0.039|  
PPT|phosphoenolpyruvate transmembrane transporter activity|||C1153596|GO|||  
PPT|phosphoenolpyruvate/phosphate translocator|||C1153596|GO|||  
PPT|phosphoenolpyruvate:phosphate antiporter  
activity|C1153596|||C1153596|GO;MTH|||  
PPT|physical performance test|C0679543|||C0679543|AOD;CHV|||  
PPT|pineal parenchymal tumor|C0031941|||C0031941|MSH;NCI|||  
PPT|plant protease test|||||1|  
PPT|pneumonia prevention therapy|||||1|  
PPT|polyp prevention trial|C1514210|||C1514210|NCI|||  
PPT|polyphosphate:AMP phosphotransferase activity|C2266415|||C2266415|GO;MTH|||  
PPT|polypurine tract|||||1|0.1494|  
PPT|post-partum thyroiditis|C0271815|||||1|0.0173|  
PPT|posterior pelvic tilt|||||1|  
PPT|postpartum thyroiditis|C0271815|||C0271815|CHV;MSH;NDFRT;SNOMEDCT|1|0.0714|1  
PPT|potassium phosphotungstate|||||1|  
PPT|ppt|C1153596;C1418854;C1551050;C2266415|||C1551050|NCI|||  
PPT|ppth|C1551050|||C1551050|NCI|||  
PPT|precipitate|C1882443|||||1|  
PPT|precipitated|||||1|  
PPT|precipitation|C0032931;C0032932;C1642401;C2584299|||||1|  
PPT|preprotachykinin|C0071942|||C0071942|MSH|1|0.1905|  
PPT|pressure pain threshold|||||1|0.1277|1  
PPT|professional protective technology|||||1|  
PPT|propyl pyrazole triol|C1172032;C1527986|||C1172032|MSH|1|0.0173|  
PPT|pulmonary physical therapy|||||1|

PPT|pulmonary platelet trapping|||||1  
PRN|As Necessary|C1879745|||C1879745|NCI|||  
PRN|As Needed|C1883728|||C1879745;C1883728|MTH;NCI|||  
PRN|As Required|C0558288|||C0558288|NCI|||  
PRN|As Situation Arises|||C1883728|NCI|||  
PRN|As required|C0558288|||C0558288|MTH;SNOMEDCT|||  
PRN|As required (qualifier value)|||C0558288|SNOMEDCT|||  
PRN|FLJ21988|C1422467|||C1422467|HUGO|||  
PRN|HPRN|C1422467|||C1422467|HUGO|||  
PRN|IOP1|C1422467|||C1422467|HUGO;OMIM|||  
PRN|IRON-ONLY HYDROGENASE-LIKE PROTEIN 1|C1422467|||C1422467|OMIM|||  
PRN|NARFL|C1422467|||C1422467|HUGO;OMIM|||  
PRN|NARFL gene|C1422467|||C1422467|HUGO;MTH|||  
PRN|NUCLEAR PRELAMIN A RECOGNITION FACTOR-LIKE|||C1422467|OMIM|||  
PRN|PRN|||C1422467;C1879745;C1883728|HUGO;NCI|||  
PRN|PRN (schedule frequency)|C1879745|||C1879745|MTH|||  
PRN|Prn|||C0558288|LNC|||  
PRN|Pro Re Nata|C1879745;C1883728|||C1883728|NCI|||  
PRN|When required|||C0558288|SNOMEDCT|||  
PRN|as needed|C1883728|1|1.000|||1  
PRN|as required|C0558288|||C0558288|CHV|||  
PRN|as-needed|C1883728|||1|0.1262|  
PRN|given as needed|C0558288|||C0558288|HL7V2.5|||  
PRN|iron-only hydrogenase-like protein 1|C1422467|||C1422467|HUGO|||  
PRN|nuclear prelamin A recognition factor-like|||C1422467|HUGO|||  
PRN|paramedian reticular nucleus|C0682738|||1|0.2816|  
PRN|plaque reduction neutralization|||1|0.2621|  
PRN|polyradiculoneuropathy|C0032587|||C0032587|CHV;MSH;NDFRT;SNOMEDCT|||  
PRN|post-rotatory nystagmus|C0524671|||C0524671|MSH|1|0.1068|  
PRN|postrotatory nystagmus|C0524671|||1|0.068|  
PRN|practice and research network|||1|0.0097|  
PRN|prn|||C0558288|CHV;SNOMEDCT|||  
PRN|prn - When required|||C0558288|SNOMEDCT|||  
PRN|pro re nata|C1879745;C1883728|||C1879745|NCI|1|0.1456|  
PRN|when required|||C0558288|CHV|||  
PR|(drug) PR||1|0.004|||1  
PR|ACIDIC SALIVARY PROLINE-RICH PROTEIN, HaeIII TYPE,  
2|C1418893|||C1418893|OMIM|||  
PR|Diagnosis.primary|C0332137|||C0332137|LNC|||  
PR|In partial remission|C1521726|||C1521726|SNOMEDCT|||  
PR|In partial remission (qualifier value)|||C1521726|SNOMEDCT|||  
PR|Incomplete remission -RETIRED-|||C1521726|SNOMEDCT|||  
PR|Main diagnosis|C0332137|||C0332137|SNOMEDCT|||  
PR|NR3C3|C1366500;C1705324|||C1366500;C1705324|HUGO;NCI|||  
PR|PAROTID PROLINE-RICH PROTEIN|C1418893|||C1418893|OMIM|||  
PR|PGR|||C0034833;C1366500;C1705324|HUGO;NCI;OMIM|||  
PR|PGR Gene|C1366500|||C1366500|NCI|||  
PR|PGR gene|C1366500|||C1366500|HUGO;MTH|||  
PR|PGR wt Allele|C1705324|||C1705324|MTH;NCI|||  
PR|PR|C0279759;C0279766;C1418864|||C0034044;C0034833;C0332137;C1366500;C1521726;  
C1540007;C1705324|HUGO;NCI;OMIM;SNOMEDCT|||  
PR|PR - Progesterone receptor|C0034833|||C0034833|SNOMEDCT|||  
PR|PR1|C1540007|||C1540007|HUGO|||  
PR|PRH2|C1418893|||C1418893|HUGO;OMIM|||  
PR|PRH2 gene|C1418893|||C1418893|HUGO;MTH|||  
PR|PRI|C0034044|||C0034044|NCI|||  
PR|PROGESTERONE RECEPT|||C0034833|MSH|||

PR|PROGESTERONE RECEPTOR|C0034833;C1366500|||C1366500|OMIM|||  
PR|PROGESTIN RECEPT|||C0034833|MSH|||  
PR|PROLINE-RICH PROTEIN, HaeIII SUBFAMILY, 2|C1418893|||C1418893|OMIM|||  
PR|PUERTO RICO|C0034044|||C0034044|NCI|||  
PR|Paeoniae radix|C0949958|||1|0.0029|  
PR|Panama red|||1|  
PR|Partial Remission|C1521726|||C1521726|NCI|||  
PR|Partial Response|C1521726|||C1521726|NCI|||  
PR|PqR|||C1366500|PDQ|||  
PR|Photoreactivation|||1|0.0064|  
PR|Plain radiography|C1306645|||1|0.0029|  
PR|Pr|C0279759;C0279766;C1418864|||C0034833;C1418893|HUGO;NCI;OMIM|||  
PR|Preyer reflex|||1|  
PR|Principal Diagnosis|C0332137;C2598194|||C0332137|LNC|||  
PR|Principal diagnosis|C0332137;C2598194|||C0332137|MTH;SNOMEDCT|||  
PR|Principal diagnosis (contextual qualifier)|||C0332137|SNOMEDCT|||  
PR|Principal diagnosis (contextual qualifier) (qualifier value)|||C0332137|SNOMEDCT|||  
PR|Progesterone Receptor|C0034833;C1366500|||C0034833|MSH;NCI;NDFRT|||  
PR|Progesterone Receptor Gene|C1366500|||C1366500|NCI|||  
PR|Progesterone Receptor wt Allele|C1705324|||C1705324|NCI|||  
PR|Progesterone Receptors|C0034833|||C0034833|MSH;NDFRT|||  
PR|Progesterone receptor|C0034833;C1366500|||C0034833|LNC;SNOMEDCT|||  
PR|Progesterone receptor (substance)|||C0034833|SNOMEDCT|||  
PR|Progesterone receptor site|C0034833|||C0034833|SNOMEDCT|||  
PR|Progesterin Receptors|C0034833|||C0034833|MSH;NDFRT|||  
PR|Projection reconstruction|||1|0.0106|  
PR|Puerto Rico|C0034044|||C0034044|AOD;CSP;LCH;MSH;MTH;NCI;SNOMEDCT|1|0.0045|  
PR|Puerto Rico (geographic location)|||C0034044|SNOMEDCT|||  
PR|RECEPT PROGESTERONE|||C0034833|MSH|||  
PR|RECEPT PROGESTIN|||C0034833|MSH|||  
PR|RQ|||C0034044|NCI|||  
PR|Receptor, Progesterone|C0034833;C1366500|||C0034833|MSH|||  
PR|Receptors, Progesterone|C0034833|||C0034833|MSH;MTH;NDFRT|||  
PR|Receptors, Progesterone [Chemical/Ingredient]|||C0034833|NDFRT|||  
PR|Receptors, Progestin|C0034833|||C0034833|MSH;NDFRT|||  
PR|Release|C0030685;C0391871;C0439180;C0680255;C1283071;C1963578|||1|0.0051|  
PR|TMEM37|C1540007|||C1540007|HUGO|||  
PR|TMEM37 gene|C1540007|||C1540007|HUGO;MTH|||  
PR|The primary diagnosis|C0332137|||C0332137|HL7V2.5|||  
PR|acidic salivary proline-rich protein, HaeIII type, 2|C1418893|||C1418893|HUGO|||  
PR|expression of pathogenesis-related|||1|0.0071|  
PR|form of phytochrome|||1|0.0019|  
PR|onset of ventricular depolarization|||1|  
PR|pack removal|||1|  
PR|pain relief|C0451615|||1|0.0029|  
PR|palindromic rheumatism|C0085574|||1|  
PR|panic reaction|C0030318|||1|  
PR|panoramic radiography|C0034579|||1|0.0023|  
PR|parallax refraction|||1|  
PR|parotid proline-rich protein|C1418893|||C1418893|HUGO|||  
PR|pars recta|||1|0.0029|1|  
PR|partial regression|||1|0.0029|  
PR|partial reinforcement|||1|  
PR|partial remission|C1521726|||C1521726|AOD;NCI|1|0.2008|1|  
PR|partial responders|||1|0.0084|

PR|partial response|C1521726|||C1521726|MTH;NCI|1|0.4894|1  
PR|particulate respirator|||||||1  
PR|passive recovery|||||||1|0.0026|  
PR|patient relations|||||||1  
PR|pattern recognition|C1518918|||||1|0.0029|  
PR|pattern reversal|C0439717|||||1|0.0035|  
PR|peer review|C0030768|||||||1  
PR|pelvic rock|||||||1  
PR|pentoxyresorufin|C0070318|||C0070318|MSH|||  
PR|per rectum|C1527425|1|0.282|||||1  
PR|percentile rank|||||||1  
PR|perennial rhinitis|C0848309|||||||1  
PR|perfusion rate|||||||1  
PR|peripheral resistance|C1258192|||C1258192|CHV;MSH|1|0.0071|1  
PR|perirenal|||||||1|0.0029|  
PR|perirhinal cortex|||||||1|0.0029|  
PR|phenol red|C0031430|||C0031430|CHV;MSH;NCI;NDFRT|1|0.0055|1  
PR|photoreaction|||||||1  
PR|photoreactivation|||||||1  
PR|photoreceptor|C0031760|||C0031760|AOD;CHV;FMA|||  
PR|physical rehabilitation|C0849487|||||||1  
PR|physician reviewer|||||||1  
PR|pityriasis  
rosea|C0032026|||C0032026|CHV;COSTAR;CST;DXP;ICD9CM;ICPC;MSH;MTH;NCI;NDFRT;SNOME  
DCT|1|0.008|1  
PR|placental restriction|||||||1|0.0016|  
PR|plaque reduction|||||||1|0.0032|  
PR|pneumatic retinopexy|C0395578|||||||1|0.0029|  
PR|polymorphic  
reticulosis|C0019623;C2350168|||C0019623;C2350168|CHV;MSH;MTH;SNOMEDCT|1|0.0048|  
PR|polymyalgia rheumatica|C0032533;C0039483|||||||1  
PR|posterior root|C2332346|||||||1  
PR|postural reflex|C0234154|||||||1  
PR|potency ratio|||||||1  
PR|potential relation|||||||1  
PR|pr|C0279759;C0279766;C1418864|||C0034833|CHV|||  
PR|pr interval|C0429087;C0488345;C0520877|1|0.504|||||  
PR|praseodymium|C0032904|||||||1  
PR|prealbumin|C0032923|||||||1|0.0032|  
PR|prednisolone|C0032950|||C0032950|AOD;CHV;CSP;LNC;MSH;MTH;MTHSPL;NCI;NDFRT;PDQ  
;RXNORM;SNOMEDCT;USPMG;VANDF|1|0.0055|  
PR|preference record|||||||1  
PR|pregnancy|C0032961|||||||1  
PR|pregnancy rate|C0032975|||C0032975|CHV;MSH|1|0.0621|1  
PR|pregnant|C0549206;C0553641;C0600457|||||||1|0.0029|  
PR|premature|C0205252|||||||1  
PR|presbyopia|C0033075|||||||1  
PR|pressoreceptor|C0033093|||||||1  
PR|pressure|C0033095;C0460139;C1306345|||||||1  
PR|prevalence ratio|||||||1|0.0183|  
PR|prevention|C0199176;C1706420;C2700409|||||||1  
PR|primary diagnosis|C0332137;C0801658|||C0332137|CHV|||  
PR|principal diagnosis|C0332137;C2598194|||C0332137|CHV|||  
PR|proctology|C0033248|||||||1  
PR|production rate|||||||1  
PR|professional relations|||||||1  
PR|profile|C1979963;C2003903|||||||1

PR|progesterone  
receptor|C0034833;C1366500|1|0.176|C0034833;C1366500|CHV;CSP;HUGO;LNC;MSH;NCI;ND  
FRT;OMIM;SNOMEDCT|||1  
PR|progesterone receptor (PR)|C0034833;C1366500|||C0034833|CHV|||  
PR|progesterone receptors|C0034833|||C0034833|CHV|||  
PR|progesterone|C0033306|||C0033306|AOD;CHV;CSP;NCI;NDFRT;PDQ;SNOMEDCT|||  
PR|progressive ratio|||1|0.0302|  
PR|progressive relaxation|||1|  
PR|progressive resistive exercise|||1|  
PR|prolactin|C0033371;C1744644|||1|  
PR|proliferative retinopathy|C0339467|||C0339467|CHV|1|0.0035|  
PR|proline-rich|||1|0.0029|  
PR|proline-rich protein HaeIII subfamily 2|C1418893|||C1418893|HUGO|||  
PR|prolonged remission|||1|  
PR|prone|C0033422|||1|  
PR|propranolol|C0033497|||C0033497|AOD;CHV;CSP;LNC;MSH;MTH;NCI;NDFRT;RXNORM;SNOM  
EDCT;USPMG;VANDF|1|0.0129|  
PR|prorenin|C0072249;C0072250|||1|0.0035|  
PR|prorenin|C0072249;C0072250|||C0072250|MSH;MTH;SNOMEDCT|||  
PR|prosthion|C2339454|||1|  
PR|protease|C0030946;C1947941|||C0030946;C1947941|CHV;CSP;LNC;NCI;NDFRT;SNOMEDCT  
;VANDF|||1|  
PR|protein|C0033684|||1|0.0061|1|  
PR|protein restriction|||1|0.0019|  
PR|proteinase|C0030946;C1622131;C1947941|||C0030946;C1622131;C1947941|CHV;CSP;GO  
;LCH;NCI;SNOMEDCT|||  
PR|pseudorabies|C0033839|||1|0.0039|  
PR|psychotherapy responder|||1|  
PR|public relations|C0034034|||1|  
PR|puerto rico|C0034044|||C0034044|CHV|||  
PR|puerto ricos|C0034044|||C0034044|CHV|||  
PR|pulmonary  
regurgitation|C0034088|1|0.024|C0034088|CHV;DXP;MSH;NCI;NDFRT;SNOMEDCT|1|0.0161|  
1  
PR|pulmonary  
rehabilitation|C0199529;C1552326;C1552340|||C0199529;C1552326;C1552340|CHV;HL7V3  
.0;SNOMEDCT|1|0.0087|1|  
PR|pulmonic regurgitation|C0034088|||1|  
PR|pulse rate|C0232117;C0391850|1|0.002|||1|  
PR|pulse repetition|||1|  
PR|punctum remotum|||1|  
PR|pyramidal response|||1|  
PR|reaction|C0443286;C1114821|||1|0.0039|  
PR|region|C0017446;C0205147|||1|0.0035|  
PR|release probability|||1|0.0023|  
PR|retention|C0035280;C0333117;C1753315|||1|0.0029|  
PR|transmembrane protein 37|C1540007|||C1540007|HUGO|||  
PR|under a progressive-ratio|||1|0.0035|  
PR|viral proteinase|||1|0.0032|  
PSA|AMINOPEPTIDASE, PUROMYCIN-SENSITIVE|C0139360;C1417779|||C1417779|OMIM|||  
PSA|ANTIGEN, PROSTATE-SPECIFIC|C0138741;C0201544;C1366489|||C1366489|OMIM|||  
PSA|APS|||C1366489;C1705954|NCI;OMIM|||  
PSA|Antigen, Prostate-Specific|C0138741;C0201544;C1366489|||C0138741|NCI|||  
PSA|Antigens|C0003320|||1|0.002|  
PSA|Benign Mixed Salivary Gland Neoplasm|C1519176|||C1519176|NCI|||  
PSA|Benign Mixed Salivary Gland Tumor|C1519176|||C1519176|NCI|||  
PSA|Benign Mixed Salivary Neoplasm|C1519176|||C1519176|NCI|||

PSA|Benign Mixed Salivary Tumor|C1519176|||C1519176|NCI|||  
PSA|EC 3.4.21.77|||C0138741|NCI|||  
PSA|ENDOMETRIAL PROGESTERONE-INDUCED PROTEIN|||C1426033|OMIM|||  
PSA|EPIP|C1426033|||C1426033|OMIM|||  
PSA|Gamma-Seminoprotein|C0138741|||C0138741|NCI|||  
PSA|HK 003 KALLIKREIN|||C0138741|MSH|||  
PSA|KALLIKREIN 3|C0138741;C1366489|||C1366489|OMIM|||  
PSA|KALLIKREIN HK 003|||C0138741|MSH|||  
PSA|KALLIKREIN-RELATED PEPTIDASE 3|||C1366489|OMIM|||  
PSA|KLK2A1|C1705954|||C1705954|NCI|||  
PSA|KLK3|C0138741;C1366489;C2987230|||C0138741;C1366489|HUGO;NCI;OMIM|||  
PSA|KLK3 Gene|C1366489|||C1366489|NCI|||  
PSA|KLK3 gene|C1366489|||C1366489|HUGO;MTH|||  
PSA|KLK3 wt Allele|C1705954|||C1705954|MTH;NCI|||  
PSA|Kallikrein 3, (Prostate Specific Antigen) Gene|||C1366489|NCI|||  
PSA|Kallikrein 3, (Prostate Specific Antigen) wt Allele|||C1705954|NCI|||  
PSA|Kallikrein hK3|C0138741|||C0138741|MSH;NDFRT|||  
PSA|Kallikrein, hK3|C0138741|||C0138741|MSH|||  
PSA|Kallikrein-3|C0138741;C1366489|||C0138741|NCI|||  
PSA|METALLOPROTEASE MP100|C1417779|||C1417779|OMIM|||  
PSA|MP100|C1417779|||C1417779|HUGO;OMIM|||  
PSA|NPEPPS|C1417779|||C1417779|HUGO;OMIM|||  
PSA|NPEPPS gene|C1417779|||C1417779|HUGO;MTH|||  
PSA|P-30 Antigen|C0138741|||C0138741|NCI|||  
PSA|P-30 antigen|C0138741|||C0138741|SNOMEDCT|||  
PSA|PHOSPHOSERINE AMINOTRANSFERASE 1|C1426033|||C1426033|OMIM|||  
PSA|PLAG1 wt Allele|C2347427|||C2347427|MTH;NCI|||  
PSA|PROS1|C1418948|||C1418948|HUGO;OMIM|||  
PSA|PROS1 gene|C1418948|||C1418948|HUGO;LNC;MTH|||  
PSA|PROSTATE-SPECIFIC ANTIGEN|C0138741;C0201544;C1366489|||C1366489|OMIM|||  
PSA|PROTEIN S|C0072393;C1418948|||C1418948|OMIM|||  
PSA|PROTEIN S, ALPHA|C1418948|||C1418948|OMIM|||  
PSA|PSA|||C0138741;C0201544;C0687688;C1366489;C1417779;C1418948;C1426033;C1519176;C1705954;C2347427|AOD;CHV;CSP;HUGO;NCI;OMIM|||  
PSA|PSA - Prostate specific antigen|C0138741|||C0138741|SNOMEDCT|||  
PSA|PSA - Prostate-specific antigen level|C0201544|||C0201544|SNOMEDCT|||  
PSA|PSA - Serum prostate specific antigen level|C0201544|||C0201544|SNOMEDCT|||  
PSA|PSA Assay|C0201544|||C0201544|NCI|||  
PSA|PSA measurement|C0201544|||C0201544|SNOMEDCT|||  
PSA|PSA test|C0201544|||C0201544|NCI|||  
PSA|PSAT|C1426033|||C1426033|OMIM|||  
PSA|PSAT1|C1426033|||C1426033|HUGO;OMIM|||  
PSA|PSAT1 gene|C1426033|||C1426033|HUGO;MTH|||  
PSA|Pisum sativum|C1262903|||1|0.0034|  
PSA|Pisum sativum agglutinin|||1|0.0055|1|  
PSA|Pleiomorphic Adenoma Gene 1 wt Allele|C2347427|||C2347427|NCI|||  
PSA|Pleomorphic adenoma of salivary gland|C1519176|||C1519176|SNOMEDCT|||  
PSA|Pleomorphic adenoma of salivary gland (disorder)|||C1519176|SNOMEDCT|||  
PSA|Power spectral analysis|||1|0.0086|  
PSA|Prostate Specific Antigen|C0138741;C0201544;C1366489|||C0138741;C0201544|MSH;NCI;NDFRT|||  
PSA|Prostate Specific Antigen Assay|C0201544|||C0201544|NCI|||  
PSA|Prostate Specific Antigen Measurement|C0201544|||C0201544|NCI|||  
PSA|Prostate Specific Antigen Preproprotein|C0138741|||C0138741|NCI|||  
PSA|Prostate specific Ag|C0138741|||C0138741|LNC|||  
PSA|Prostate specific Antigen|C0138741;C0201544;C1366489|||C0138741|LNC|||  
PSA|Prostate specific antigen|C0138741;C0201544;C1366489|||C0138741|SNOMEDCT|||

PSA|Prostate specific antigen (& serum level)|||C0201544|SNOMEDCT|||  
PSA|Prostate specific antigen (& serum level)  
(procedure)|||C0201544|SNOMEDCT|||  
PSA|Prostate specific antigen (procedure)|||C0138741|SNOMEDCT|||  
PSA|Prostate specific antigen (substance)|||C0138741|SNOMEDCT|||  
PSA|Prostate specific antigen measurement|C0201544|||C0201544|MTH;SNOMEDCT|||  
PSA|Prostate specific antigen measurement (procedure)|||C0201544|SNOMEDCT|||  
PSA|Prostate-Specific  
Antigen|C0138741;C0201544;C1366489|||C0138741|MSH;MTH;NCI;NDFRT|||  
PSA|Prostate-Specific Antigen [Chemical/Ingredient]|||C0138741|NDFRT|||  
PSA|Prostate-specific antigen level|||C0201544|SNOMEDCT|||  
PSA|Prostate-specific antigen level (procedure)|||C0201544|SNOMEDCT|||  
PSA|Prostatic Specific Antigen Measurement|C0201544|||C0201544|NCI|||  
PSA|SALIVARY GLAND ADENOMA, PLEOMORPHIC|C1519176|||C1519176|OMIM|||  
PSA|SGPA|C0258101;C1519176;C2347427|||C1519176;C2347427|NCI;OMIM|||  
PSA|Salivary Gland Pleomorphic Adenoma|C1519176|||C1519176|MTH;NCI|||  
PSA|Semenogelase|C0138741|||C0138741|MSH;NCI;NDFRT;SNOMEDCT|||  
PSA|Semenogelase (substance)|||C0138741|SNOMEDCT|||  
PSA|Seminal|C0138741|||C0138741|MSH;NCI;NDFRT;SNOMEDCT|||  
PSA|activity|C0026606;C0205177;C0439167;C0441655;C1561536|||1|0.0028|  
PSA|aminopeptidase puromycin sensitive|||C1417779|HUGO|||  
PSA|antigen prostate specific test|C0201544|||C0201544|CHV|||  
PSA|antigen prostate specific testing|C0201544|||C0201544|CHV|||  
PSA|biochemical|C0205474|||1|0.0026|  
PSA|gamma Seminoprotein|C0138741|||C0138741|MSH|||  
PSA|gamma seminoprotein|C0138741|||C0138741|CSP|||  
PSA|gamma-Seminoprotein|C0138741|||C0138741|MSH;NDFRT|||  
PSA|hK3|C1150530;C1415556;C1428139;C1705954|||C1705954|NCI|||  
PSA|hK3 Kallikrein|C0138741|||C0138741|MSH;NDFRT|||  
PSA|kallikrein-related peptidase 3|||C1366489|HUGO|||  
PSA|metalloproteinase MP100|C1417779|||C1417779|HUGO|||  
PSA|pacemaker system analysis|||1|  
PSA|pathologic spontaneous activity|||1|  
PSA|persistent sciatic artery|||1|0.0024|1|  
PSA|phosphoserine aminotransferase 1|C1426033|||C1426033|HUGO|||  
PSA|picryl sulfonic acid|||1|  
PSA|polar surface area|||1|0.0024|  
PSA|polyethylene sulfonic acid|||1|  
PSA|polysialic acid|C0071677|||C0071677|MSH;NCI;PDQ|1|0.0225|  
PSA|polysubstance abuse|C0747752|||1|  
PSA|population spike amplitude|||1|0.0028|  
PSA|porcine serum albumin|||1|0.0016|  
PSA|posterior spinal artery|C0226233;C1278947|||1|  
PSA|potentiometric stripping analysis|||1|0.002|  
PSA|power spectral analysis|||1|  
PSA|pressure sensitive adhesive|||1|0.0018|  
PSA|procedural sedation and analgesia|||1|  
PSA|product selection allowed|||1|  
PSA|progressive spinal ataxia|C1827682|||1|  
PSA|prolonged sleep apnea|||1|  
PSA|proportion of survivors affected|||1|  
PSA|prostate specific ag|C0138741|||C0138741|CHV|||  
PSA|prostate specific antigen|C0138741;C0201544;C1366489|||C0138741|CHV;CSP|||  
PSA|prostate specific antigen (PSA)|C0138741;C0201544;C1366489|||C0138741|CHV|||  
PSA|prostate specific antigen (PSA) level test|||C0201544|CHV|||  
PSA|prostate specific antigen test|C0201544|||C0201544|CHV|||

PSA|prostate-specific antigen|C0138741;C0201544;C1366489|1|1.000|C0138741;C1366489|CHV;MSH;MTH;NCI;NDFRT;OMIM|1|0.8806|1  
 PSA|prostate-specific antigen test|C0201544|||C0201544|NCI|||  
 PSA|protein S (alpha)|||C1418948|HUGO|||  
 PSA|psa antigen|C0138741|||C0138741|CHV|||  
 PSA|pseudoaneurysm|C0162868;C1510412|||C0162868;C1510412|CHV;MSH;MTH;NCI;NDFRT;SNOMEDCT|||1  
 PSA|psoriatic arthritis|C0003872|||C0003872|AIR;CHV;COSTAR;CSP;MEDLINEPLUS;MSH;NCI;QMR;SNOMEDCT|1|0.0528|1  
 PSA|public service announcement|C0687688|||C0687688|AOD;CHV;MTH|||1  
 PSA|puromycin-sensitive aminopeptidase|C0139360;C1417779|||C0139360;C1417779|HUGO;MSH;MTH|1|0.0024|  
 PSA|systemic arterial pressure|C1272641|||1|0.0037|1  
 PSVT|PAROXYSMAL SUPRAVENTRICULAR TACHYCARDIA|C0030590|||C0030590|DXP|||  
 PSVT|PSVT|C0030590|||C0030590|NCI|||  
 PSVT|Parox atrial tachycardia|||C0030590|ICD9CM|||  
 PSVT|Paroxysmal Supraventricular Tachycardia|C0030590|||C0030590|NCI|||  
 PSVT|Paroxysmal sup. tachy.|||C0030590|SNOMEDCT|||  
 PSVT|Paroxysmal supraventricular tachycardia|C0030590|||C0030590|CCS;ICD9CM;MTH;SNOMEDCT|||  
 PSVT|Paroxysmal supraventricular tachycardia (disorder)|||C0030590|SNOMEDCT|||  
 PSVT|Paroxysmal supraventricular tachycardia NOS|C0030590|||C0030590|SNOMEDCT|||  
 PSVT|Paroxysmal supraventricular tachycardia NOS (disorder)|||C0030590|SNOMEDCT|||  
 PSVT|Supravent. tach. parox.|||C0030590|SNOMEDCT|||  
 PSVT|TACHYCARDIA, PAROXYSMAL SUPRAVENTRICULAR|C0030590|||C0030590|DXP|||  
 PSVT|Tachycardia - parox.sup.|||C0030590|SNOMEDCT|||  
 PSVT|paroxysmal supraventricular tachycardia|C0030590|1|1.000|C0030590|CCS;DXP;ICD9CM;MTH;NCI;SNOMEDCT|1|1|1  
 PSVT|paroxysmal supraventricular tachycardia (PSVT)|C0030590|||C0030590|CHV|||  
 PSVT|psvt|C0030590|||C0030590|CHV|||  
 PTCA|Angioplasties, Coronary Balloon|C0002997|||C0002997|MSH|||  
 PTCA|Angioplasty, Balloon, Coronary|C0002997|||C0002997|MSH;MTH|||  
 PTCA|Angioplasty, Coronary Balloon|C0002997|||C0002997|MSH|||  
 PTCA|Angioplasty, Transluminal, Percutaneous Coronary|C2936173|||C2936173|MSH;MTH|||  
 PTCA|Balloon Angioplasties, Coronary|C0002997|||C0002997|MSH|||  
 PTCA|Balloon Angioplasty, Coronary|C0002997|||C0002997|MSH|||  
 PTCA|Balloon Dilatation, Coronary Artery|C0002997|||C0002997|MSH|||  
 PTCA|Balloon angioplasty of coronary artery|C0002997;C2936173|||C0002997;C2936173|MTHICD9;SNOMEDCT|||  
 PTCA|Coronary Angioplasty, Transluminal Balloon|C0002997|||C0002997|MSH|||  
 PTCA|Coronary Balloon Angioplasties|C0002997|||C0002997|MSH|||  
 PTCA|Coronary Balloon Angioplasty|C0002997|||C0002997|MSH|||  
 PTCA|PTCA|C0002997;C2936173|||C2936173|CSP;ICD9CM|||  
 PTCA|PTCA (percutaneous transluminal coronary angioplasty)|C2936173|||C2936173|CSP|||  
 PTCA|PTCA - Percutaneous transluminal coronary angioplasty|C2936173|||C2936173|SNOMEDCT|||  
 PTCA|PTCA NOS|C0002997;C2936173|||C2936173|MTHICD9|||  
 PTCA|Percutaneous Transluminal Coronary Angioplasty|C2936173|||C2936173|MSH;MTH;NCI|||  
 PTCA|Percutaneous angioplasty of coronary artery|C2936173|||C2936173|SNOMEDCT|||  
 PTCA|Percutaneous balloon angioplasty of coronary artery|||C2936173|SNOMEDCT|||

PTCA|Percutaneous transluminal coronary angioplasty|C2936173|||C2936173|SNOMEDCT|||  
PTCA|Percutaneous transluminal coronary angioplasty (PTCA)|C2936173|||C2936173|CCS|||  
PTCA|Percutaneous transluminal coronary angioplasty (procedure)|||C2936173|SNOMEDCT|||  
PTCA|Percutaneous transluminal coronary angioplasty [PTCA]|C2936173|||C2936173|ICD9CM|||  
PTCA|Percutaneous transluminal coronary balloon angioplasty|C2936173|||C2936173|SNOMEDCT|||  
PTCA|Transluminal Coronary Balloon Dilation|C0002997|||C0002997|MSH|||  
PTCA|balloon angioplasty|C0002996;C0002997|||C0002997|CHV|||  
PTCA|coronary angioplasty|C0002997;C0190211|||C0002997|CHV|||  
PTCA|coronary artery balloon dilation|C0002997|||C0002997|CHV|||  
PTCA|coronary balloon angioplasty|C0002997|||C0002997|CHV|||  
PTCA|parent to child aggression|||1|||1|||1|||  
PTCA|percutaneous transhepatic cholangiogram|C0203085;C1548898|||1|||1|||1|||  
PTCA|percutaneous transhepatic cholangiograph|||1|||1|||1|||1|||  
PTCA|percutaneous transhepatic cholangiography|C0203085|||1|||1|||1|||1|||  
PTCA|percutaneous transluminal coronary angiography|||1|||1|||1|||1|||0.0036|  
PTCA|percutaneous transluminal coronary angioplasty|C2936173|1|1.000|C2936173|MSH;MTH;NCI;SNOMEDCT|1|0.99|1  
PTCA|percutaneous transluminal coronary angioplasty (PTCA)|C2936173|||C0002997|CHV|||  
PTCA|percutaneous transluminal coronary arteriography|||1|||1|||1|||1|||1|||  
PTCA|ptca|C0002997;C2936173|||C0002997|CHV|||  
PTCA|pyrrole-2,3,5-tricarboxylic acid|||1|||1|||1|||1|||0.0064|  
PTFE|Ethene, tetrafluoro-, homopolymer|C0032611|||C0032611|MSH;NDFRT|||  
PTFE|FEP|C0032611;C0281678|||C0032611|MSH;NDFRT|||  
PTFE|PTFE|C0032611|||C0032611|CSP;MSH;NDFRT|||  
PTFE|PTFE (polytetrafluoroethylene)|||C0032611|CSP|||  
PTFE|PTFE - Polytetrafluoroethylene|||C0032611|SNOMEDCT|||  
PTFE|Paratetrafluoroethylene|C0032611|||C0032611|SNOMEDCT|||  
PTFE|Paratetrafluoroethylene (substance)|||C0032611|SNOMEDCT|||  
PTFE|Politef|C0032611|||C0032611|MSH;NDFRT|||  
PTFE|Polytef|C0032611|||C0032611|MSH;NDFRT|||  
PTFE|Polytetrafluorethylene|||1|||1|||1|||1|||0.0531|  
PTFE|Polytetrafluoroethylene|C0032611|||C0032611|MSH;MTH;NDFRT;SNOMEDCT|||  
PTFE|Polytetrafluoroethylene (substance)|||C0032611|SNOMEDCT|||  
PTFE|Polytetrafluoroethylene [Chemical/Ingredient]|||C0032611|NDFRT|||  
PTFE|TFE|C0032611;C0076258|||C0032611|MSH;NDFRT|||  
PTFE|Teflon|C0032611;C0699518|||C0032611|SNOMEDCT|||  
PTFE|poly(tetrafluoroethylene)|||1|||1|||1|||1|||0.0234|  
PTFE|polytetraflouroethylene|||1|||1|||1|||1|||0.0081|  
PTFE|polytetrafluoroethylene|C0032611|1|1.000|C0032611|CHV|1|0.9154|1  
PTFE|polytetrafluoroethylene (PTFE)|C0032611|||C0032611|CHV|||  
PTH|Hormone, Parathyroid|C0030520;C1882913|||C0030520|MSH|||  
PTH|Intact parathyroid hormone (substance)|||C0030520|SNOMEDCT|||  
PTH|PARATHORMONE|C0030520|||C1419072|OMIM|||  
PTH|PARATHYRIN|C0030520|||C1419072|OMIM|||  
PTH|PARATHYROID|C0030518;C0030520|||C0030520|NDFRT;VANDF|||  
PTH|PARATHYROID HORMONE|C0030520;C1882913|||C1419072|OMIM|||  
PTH|PTH|||C0020063;C0030520;C1419072;C1705340|CHV;CSP;HUGO;NCI;OMIM;PDQ|||  
PTH|PTH (1-84)|||C0030520|MSH;NDFRT|||  
PTH|PTH - Parathyroid hormone|C0030520|||C0030520|SNOMEDCT|||  
PTH|PTH Gene|C1419072|||C1419072|NCI|||  
PTH|PTH gene|C1419072|||C1419072|HUGO;MTH|||

PTH|PTH protein, human|C0020063|||C0020063|MSH;MTH|||  
PTH|PTH wt Allele|C1705340|||C1705340|MTH;NCI|||  
PTH|PTH1|C1419072;C1826737|||C1419072|HUGO|||  
PTH|Parathormone|C0030520|||C0020063;C0030520|MSH;NCI;NDFRT;PDQ;SNOMEDCT|||  
PTH|Parathormone (substance)|||C0030520|SNOMEDCT|||  
PTH|Parathormone preparation|C0030520|||C0030520|SNOMEDCT|||  
PTH|Parathormone preparation, NOS|C0030520|||C0030520|SNOMEDCT|||  
PTH|Parathormone, NOS|C0030520|||C0030520|SNOMEDCT|||  
PTH|Parathyrin|C0030520|||C0020063;C0030520|LNC;MSH;NCI;NDFRT;PDQ|||  
PTH|Parathyroid|C0030518;C0030520|||C0030520|USPMG|||  
PTH|Parathyroid  
Hormone|C0030520;C1882913|||C0020063;C0030520|MSH;MTH;NCI;NDFRT|||  
PTH|Parathyroid Hormone (1-84)|||C0030520|MSH;NDFRT|||  
PTH|Parathyroid Hormone Gene|C1419072|||C1419072|NCI|||  
PTH|Parathyroid Hormone [Chemical/Ingredient]|||C0030520|NDFRT|||  
PTH|Parathyroid Hormone [EPC]|C0030520|||C0030520|NDFRT|||  
PTH|Parathyroid Hormone wt Allele|C1705340|||C1705340|NCI|||  
PTH|Parathyroid extract|C0030520|||C0030520|SNOMEDCT|||  
PTH|Parathyroid extract, NOS|C0030520|||C0030520|SNOMEDCT|||  
PTH|Parathyroid hormone|C0030520;C1882913|||C0030520|FMA;LCH;SNOMEDCT|||  
PTH|Parathyroid hormone (substance)|||C0030520|SNOMEDCT|||  
PTH|Parathyroid hormone agent|C0030520|||C0030520|SNOMEDCT|||  
PTH|Parathyroid hormone agent (substance)|||C0030520|SNOMEDCT|||  
PTH|Parathyroid hormone preparation|C0030520|||C0030520|SNOMEDCT|||  
PTH|Parathyroid hormone preparation (product)|||C0030520|SNOMEDCT|||  
PTH|Parathyroid hormone preparation (substance)|||C0030520|SNOMEDCT|||  
PTH|Parathyroid hormone preparation, NOS|C0030520|||C0030520|SNOMEDCT|||  
PTH|Parathyroid hormone, NOS|C0030520;C1882913|||C0030520|SNOMEDCT|||  
PTH|Parathyroid hormones|C0030520|||C0030520|LNC|||  
PTH|Parathyroid-class Hormone|C0030520|||C0030520|NDFRT|||  
PTH|Posttetanic hyperpolarization|||1|0.0011|  
PTH|[HS600] PARATHYROID|C0030520|||C0030520|NDFRT|||  
PTH|chest wall elastic recoil pressure|||1|  
PTH|hPTH(1-84)|||C0020063|MSH|||  
PTH|parathormone|C0030520|||C0020063;C0030520;C0202159;C1419072|AOD;CHV;CSP;HUGO  
;MSH;NCI;NDFRT;OMIM;PDQ;SNOMEDCT|1|0.0395|  
PTH|parathyrin|C0030520|||C0020063;C0030520;C1419072|AOD;CHV;HUGO;LNC;MSH;NCI;ND  
FRT;OMIM;PDQ|1|0.0037|  
PTH|parathyroid|C0030518;C0030520|||1|0.0037|  
PTH|parathyroid  
hormone|C0030520;C1882913|1|1.000|C0020063;C0030520;C1419072;C1882913|AOD;CHV;CS  
P;FMA;HUGO;LCH;MSH;MTH;NCI;NDFRT;OMIM;PDQ;SNOMEDCT|1|0.9204|1  
PTH|parathyroid hormone 1|C1419072|||C1419072|HUGO|||  
PTH|parathyroid hormone 1-34|||1|0.0007|  
PTH|parathyroid hormone gene|C1419072|||1|0.0015|  
PTH|parathyroid hormone levels|||1|0.002|  
PTH|parathyroid hormone, human|C0020063|||C0020063|MSH|||  
PTH|parathyroid hormones|C0030520|||C0030520|CHV|||  
PTH|pathologic|C1521733|||1|  
PTH|pathology|C0030664;C0205469;C0677042|||1|  
PTH|peptidyl-tRNA hydrolase|C0051616|||1|0.0035|  
PTH|phenylthiohydantoin|C0031504|||C0031504|AOD;MSH;NDFRT|1|0.007|  
PTH|plasma parathyroid hormone|||1|  
PTH|plasma thromboplastin|||1|  
PTH|post-tetanic hyperpolarization|||1|0.0013|  
PTH|post-transfusion hepatitis|C0520788|||1|0.0074|  
PTH|posttransfusion hepatitis|C0520788|||C0520788|CSP;SNOMEDCT|1|0.0037|1

PTH|posttraumatic headache|C0032816|||C0032816|CHV;MSH;SNOMEDCT|||  
PTH|pressure threshold|||1|0.0017|  
PTH|primary thrombocythemia|C0040028|||1|  
PTH|prior to hospitalization|||1|  
PTH|threshold pressure|||1|0.0029|  
PT|^patient|C0030705|||C0030705|LNC|||  
PT|Coagulation Factor II (Thrombin) wt Allele|||C2826539|NCI|||  
PT|F2 wt Allele|C2826539|||C2826539|MTH;NCI|||  
PT|LAY USER/PATIENT|||C0030705|NCI|||  
PT|Modalities, Physical Therapy|C0949766|||C0949766|MSH|||  
PT|Modality, Physical Therapy|C0949766|||C0949766|MSH|||  
PT|Nuclei parataeniales thalami|C0175252|||C0175252|FMA|||  
PT|Nucleus parataenialis|C0175252|||C0175252|FMA|||  
PT|Nucleus parataenialis (Hassler)|||C0175252|FMA|||  
PT|Nucleus parataenialis thalami|C0175252|||C0175252|FMA|||  
PT|Nucleus paratenialis thalami|C0175252|||C0175252|FMA|||  
PT|Nucleus, Paratenial|C0175252;C1828005|||C0175252|MSH|||  
PT|Nucleus, Paratenial Thalamic|C0175252|||C0175252|MSH|||  
PT|One stage prothrombin time|||C0033707|SNOMEDCT|||  
PT|One stage prothrombin time (procedure)|||C0033707|SNOMEDCT|||  
PT|PATIENT|C0030705|||C0030705|NCI|||  
PT|PHYSICAL THER TECHNIQUES|||C0949766|MSH|||  
PT|PHYSIOTHER PRACTICE|||C0949766|MSH|||  
PT|PINT|C0560012|||C0560012|NCI|||  
PT|PLATINUM|C0032207;C1171558;C1553253|||C0032207|NCI|||  
PT|PO|C0442027|||C0032729|NCI|||  
PT|PORTUGAL|C0032729|||C0032729|NCI|||  
PT|PRT|C0020687;C0032729;C1152182|||C0032729|NCI|||  
PT|PT|||C0030705;C0032207;C0032729;C0033707;C0560012;C0949766;C1705337;C2347664  
;C2826539|LNC;NCI;SNOMEDCT|||  
PT|PT - Physiotherapy|C0949766|||C0949766|SNOMEDCT|||  
PT|PT - Prothrombin time|C0033707|||C0033707|SNOMEDCT|||  
PT|PT Term Type|C1705337|||C1705337|MTH;NCI|||  
PT|PT assay|C0033707|||C0033707|SNOMEDCT|||  
PT|PTT - Prothrombin time|||C0033707|SNOMEDCT|||  
PT|Pain threshold|C0162703|||1|0.0097|  
PT|Parataenial nucleus|C0175252;C1828005|||C0175252|FMA;SNOMEDCT|||  
PT|Parataenial nucleus of thalamus|C0175252;C1828005|||C0175252|SNOMEDCT|||  
PT|Parataenial nucleus of thalamus (body structure)|||C0175252|SNOMEDCT|||  
PT|Paratenial Nucleus|C0175252;C1828005|||C0175252|MSH;MTH|||  
PT|Paratenial Thalamic Nucleus|C0175252|||C0175252|MSH|||  
PT|Paratenial nucleus|C0175252;C1828005|||C0175252|FMA;SNOMEDCT|||  
PT|Paratenial nucleus of thalamus|C0175252;C1828005|||C0175252|SNOMEDCT|||  
PT|Paratenial thalamic nucleus|C0175252|||C0175252|FMA|||  
PT|Pathologic T category|C1270004|||C1270004|SNOMEDCT|||  
PT|Patient|C0030705|||C0030705|LNC;MSH;NCI;SNOMEDCT|||  
PT|Patient (person)|||C0030705|SNOMEDCT|||  
PT|Patients|C0030705|||C0030705|LCH;MSH;MTH;NCI|||  
PT|Physiatric Procedure|C0949766|||C0949766|NCI|||  
PT|Physiatric procedure|C0949766|||C0949766|SNOMEDCT|||  
PT|Physiatric procedure, NOS|C0949766|||C0949766|SNOMEDCT|||  
PT|Physical Medicine Procedure|C0949766|||C0949766|NCI|||  
PT|Physical Medicine and Rehabilitation Procedures|||C0949766|MTHCH|||  
PT|Physical Therapeutics|C0949766|||C0949766|NCI|||  
PT|Physical Therapy|C0699718;C0949766|||C0949766|MEDLINEPLUS;NCI|||  
PT|Physical Therapy Modalities|C0949766|||C0949766|MSH|||  
PT|Physical Therapy Modality|C0949766|||C0949766|MSH|||

PT|Physical Therapy Procedure|C0949766|||C0949766|NCI|||  
PT|Physical Therapy Technique|C0949766|||C0949766|MSH|||  
PT|Physical Therapy Techniques|C0949766|||C0949766|MSH|||  
PT|Physical medicine procedure|C0949766|||C0949766|SNOMEDCT|||  
PT|Physical medicine procedure (procedure)|||C0949766|SNOMEDCT|||  
PT|Physical medicine procedure (regime/therapy)|||C0949766|SNOMEDCT|||  
PT|Physical medicine procedure, NOS|C0949766|||C0949766|SNOMEDCT|||  
PT|Physical therapy|C0699718;C0949766|||C0949766|CCS;LCH;LNC;MTH|||  
PT|Physical therapy procedure|C0949766|||C0949766|SNOMEDCT|||  
PT|Physical therapy procedure (procedure)|||C0949766|SNOMEDCT|||  
PT|Physical therapy procedure (regime/therapy)|||C0949766|SNOMEDCT|||  
PT|Physical therapy procedure, NOS|C0949766|||C0949766|SNOMEDCT|||  
PT|Physical therapy treatment|C0949766|||C0949766|LNC|||  
PT|Physiotherapies (Techniques)|||C0949766|MSH|||  
PT|Physiotherapy|C0949766|||C0949766|LNC;NCI;SNOMEDCT|||  
PT|Physiotherapy (Techniques)|C0949766|||C0949766|MSH|||  
PT|Physiotherapy Procedure|C0949766|||C0949766|NCI|||  
PT|Physiotherapy procedure|C0949766|||C0949766|SNOMEDCT|||  
PT|Physiotherapy procedure, NOS|C0949766|||C0949766|SNOMEDCT|||  
PT|Physiotherapy, NOS|C0949766|||C0949766|SNOMEDCT|||  
PT|Pint|C0560012|||C0560012|NCI|||  
PT|Planum Temporale|||1|0.0164|  
PT|Platinum|C0032207;C1171558;C1553253|||C0032207|LCH;LNC;MSH;MTH;NCI;NDFRT;SNOM  
EDCT|||  
PT|Platinum (substance)|||C0032207|SNOMEDCT|||  
PT|Platinum Black|C0032207|||C0032207|MSH;NDFRT|||  
PT|Platinum [Chemical/Ingredient]|||C0032207|NDFRT|||  
PT|Platinum, NOS|C0032207;C1171558;C1553253|||C0032207|SNOMEDCT|||  
PT|Point in time|C1442880;C1552684;C2348792|||C1442880|MTH|||  
PT|Portugal|C0032729|||C0032729|AOD;LCH;MSH;MTH;NCI;SNOMEDCT|||  
PT|Portugal (geographic location)|||C0032729|SNOMEDCT|||  
PT|Preferred Term|C1709637;C2347664|||C2347664|MTH;NCI|||  
PT|Prothrombin Time|C0033707|||C0033707|MSH;NCI|||  
PT|Prothrombin Time Test|C0033707;C0491338|||C0033707|NCI|||  
PT|Prothrombin Times|C0033707|||C0033707|MSH|||  
PT|Prothrombin time|C0033707|||C0033707|SNOMEDCT|1|0.3054|  
PT|Prothrombin time (procedure)|||C0033707|SNOMEDCT|||  
PT|Prothrombin time assay|C0033707|||C0033707|MTH|||  
PT|Prottime|C0033707|||C0033707|SNOMEDCT|||  
PT|Pt|||C0032207;C0175252;C1442880|FMA;LNC;MTH;NCI|||  
PT|Pt - Platinum|C0032207|||C0032207|SNOMEDCT|||  
PT|Pt element|C0032207|||C0032207|CSP|||  
PT|Quick one stage prothrombin time|C0033707|||C0033707|SNOMEDCT|||  
PT|Structure of paratenial nucleus of thalamus|C0175252|||C0175252|SNOMEDCT|||  
PT|Structure of paratenial nucleus of thalamus (body  
structure)|||C0175252|SNOMEDCT|||  
PT|TNM category pT|C1270004|||C1270004|MTH|||  
PT|Techniques, Physical Therapy|C0949766|||C0949766|MSH|||  
PT|Thalamic Nucleus, Paratenial|C0175252|||C0175252|MSH|||  
PT|Therapy - physio.|||C0949766|SNOMEDCT|||  
PT|Time, Prothrombin|C0033707|||C0033707|MSH|||  
PT|Times, Prothrombin|C0033707|||C0033707|MSH|||  
PT|Twitch tension|||1|0.0097|  
PT|[pt\_us]|||C0560012|NCI|||  
PT|^Patient|C0030705|||C0030705|LNC|||  
PT|depth of tumor invasion|||1|0.0015|  
PT|isometric twitch|||1|0.0018|

PT|pT||||C1270004|SNOMEDCT|||  
PT|pT category|C1270004|||C1270004|SNOMEDCT|||  
PT|pT category (observable entity)|||C1270004|SNOMEDCT|||  
PT|pT category (tumor staging)|||C1270004|SNOMEDCT|||  
PT|pT stage|C1270004|||C1270004|SNOMEDCT|||  
PT|pT stage (tumor staging)|||C1270004|SNOMEDCT|||  
PT|pain threshold|C0162703|||C0162703|CHV;CSP;MSH;NCI;SNOMEDCT|||  
PT|palatal tremor|C1837546|||C1837546|OMIM|||  
PT|palatine  
tonsil|C0040421;C1280736|||C0040421;C1280736|CHV;FMA;MSH;MTH;NCI;SNOMEDCT;UWDA|||  
|  
PT|pancreas  
transplantation|C0030275|||C0030275|CHV;CSP;MEDLINEPLUS;MSH;MTH;MTHCH;NCI|1|0.0029|  
PT|paralytic tremor|||||1|0.0044|  
PT|paratenial nucleus|C0175252;C1828005|||C0175252|CHV|||  
PT|parathyroid|C0030518;C0030520|||C0030517;C0030518;C0030520|AOD;CHV;CST;LNC;NCI;NDFRT;SNOMEDCT;USPMG;VANDF|1|0.01|  
PT|parathyroid hormone|C0030520;C1882913|||||1|  
PT|paroxysmal tachycardia|C0039236|||||1|  
PT|pars tensa|C0229372|||C0229372|SNOMEDCT|||  
PT|pars tubercularis|||||1|0.0284|  
PT|part|C0449719;C1709471|||||1|  
PT|patch test|C0030646|||C0030646|AOD;CHV;MSH;SNOMEDCT|||  
PT|patellar  
tendon|C0206332;C1827621|||C0206332;C1827621|CHV;MSH;SNOMEDCT|1|0.0132|  
PT|patient|C0030705|||C0030705;C1550655;C1578478;C1578479;C1578480;C1578481;C1578483;C1578484;C1578485;C1578486;C1705908|AOD;CHV;HL7V2.5;HL7V3.0;LNC;MSH;NCI;SNOMEDCT|||1|  
PT|patients|C0030705|||C0030705|CHV|1|0.0126|  
PT|peak torque|||||1|0.0261|  
PT|percutaneous tracheostomy|C0584877|||C0584877|CHV;SNOMEDCT|1|0.0035|  
PT|pericardial tamponade|C0007177|||||1|  
PT|perinuclear theca|C2246398|||C2246398|GO|1|0.0038|  
PT|permanent and total|||||1|  
PT|permeability transition|||||1|0.024|  
PT|permissive temperature|||||1|0.0015|  
PT|pertussis|C0043167|||C0031237;C0043167|AOD;CHV;COSTAR;CSP;DXP;HL7V2.5;HL7V3.0;MEDLINEPLUS;MSH;MTH;NCI;NDFRT;SNOMEDCT|||  
PT|pertussis  
toxin|C0020731|||C0020731|CHV;CSP;LCH;MSH;NCI;NDFRT;SNOMEDCT|1|0.1669|1|  
PT|pertussis toxoid|C0070476|||C0070476|MSH|1|0.0041|1|  
PT|phacotrabeculectomy|||||1|  
PT|phage type|C0441761|||C0441761|SNOMEDCT|1|0.0231|1|  
PT|pharmacy and therapeutics|||||1|  
PT|phenytoin|C0031507|||C0031507|AOD;CHV;CSP;LCH;LNC;MSH;MTH;MTHSPL;NCI;NDFRT;RXNORM;SNOMEDCT;USPMG;VANDF|1|0.0044|  
PT|phonation time|||||1|  
PT|phosphotransferase|C0031727|||||1|  
PT|phosphotyrosine|C0070948|||C0070948|MSH;NDFRT|||  
PT|photophobia|C0085636|||||1|  
PT|phototherapy|C0031765|||C0031765|AOD;CHV;CSP;LCH;MSH;MTH;NCI;PDQ;SNOMEDCT|1|0.0035|  
PT|photothermal|||||1|0.0026|  
PT|phototoxicity|C0162830;C1527358|||||1|  
PT|phyllodes  
tumor|C0010701|||C0010701|CHV;MSH;MTH;NCI;NDFRT;OMIM;PDQ;SNOMEDCT|1|0.0047|

PT|physical procedures therapy|C0949766|||C0949766|CHV|||  
PT|physical technique therapy|C0949766|||C0949766|CHV|||  
PT|physical therapies|C0949766|||C0949766|CHV|||  
PT|physical therapis|||C0949766|CHV|||  
PT|physical therapist|C2362565|||C2362565|CHV;HL7V3.0;MSH;MTH;NCI;SNOMEDCT|||  
PT|physical  
therapy|C0699718;C0949766|1|0.910|C0699718;C0949766;C1547999;C1552441|AOD;CCS;CH  
V;CSP;HL7V2.5;HL7V3.0;LCH;LNC;MEDLINEPLUS;MTH;NCI|1|0.0281|1  
PT|physical therapy techniques|C0949766|||C0949766|CHV|||  
PT|physical therapy treatment|C0949766|||C0949766|CHV|||  
PT|physical therapy treatments|C0949766|||C0949766|CHV|||  
PT|physical training|||1|0.0061|1  
PT|physiotherapi|||C0949766|CHV|||  
PT|physiotherapies|C0949766|||C0949766|CHV|||  
PT|physiotherapis|||C0949766|CHV|||  
PT|physiotherapist|C2362565|||C2362565|CHV;MSH;SNOMEDCT|||  
PT|physiotherapy|C0949766|||C0949766|AOD;CHV;LNC;NCI;PDQ;SNOMEDCT|1|0.007|  
PT|physiotherapy techniques|C0949766|||C0949766|CHV|||  
PT|picrotoxin|C0031890|||C0031890|AOD;CHV;CSP;LCH;MSH;MTH;NDFRT;SNOMEDCT|1|0.002  
6|  
PT|pine tar|C0031938|||1|1  
PT|pint|C0560012|||C0560012|CHV;HL7V3.0;MTH;SNOMEDCT|||1  
PT|pint (qualifier value)|||C0560012|SNOMEDCT|||  
PT|pituitary tumor|C0032019|||C0032019|CHV;DXP;MSH;NCI;PDQ;SNOMEDCT|||  
PT|plasma thromboplastin|||1|1  
PT|plastid|C0206524|||1|0.0026|  
PT|platelet|C0005821|||C0005821|CHV;CSP;FMA;LNC;MSH;NCI;SNOMEDCT;UWDA|||  
PT|platinum|C0032207;C1171558;C1553253|||C0032207|AOD;CHV;CSP;NCI|1|0.0644|1  
PT|platinum (Pt)|C0032207;C1171558;C1553253|||C0032207|CHV|||  
PT|pluridirectional tomography|||1|1  
PT|pneumotachograph|C0182334|||C0182334|SNOMEDCT|1|0.0026|  
PT|pneumothorax|C0032326;C1963215|||1|1  
PT|point|C1552961;C2347617|||1|1  
PT|polyvalent tolerance|||1|1  
PT|portugal|C0032729|||C0032729|CHV|||  
PT|post-treatment|C2709088|||1|0.0073|  
PT|posterior tibial||1|0.042||1|0.0029|1  
PT|posttransplant|||1|1  
PT|pregnanetriol|C0033007|||C0033007|LNC;MSH;MTH;NDFRT;SNOMEDCT|||  
PT|premature thelarche|C0425772|||C0425772|CHV;OMIM;SNOMEDCT|||  
PT|presynaptic terminal|C0206181;C1514404|||C0206181;C1514404|CHV;MSH;NCI|||  
PT|pretectum|C0175354|||C0175354|FMA|1|0.0047|  
PT|preterm|||1|0.0108|1  
PT|prick test|C0430561|||C0430561|CHV;SNOMEDCT|||  
PT|primary thrombocythaemia|C0040028|||1|0.005|  
PT|primary thrombocythemia|C0040028|||C0040028|CHV;CSP;MSH;NCI|1|0.0029|1  
PT|primary tumor|C0677930|||C0677930|CHV;NCI|||  
PT|primary tumour|C0677930|||1|0.0015|  
PT|procedure physical therapy|C0949766|||C0949766|CHV|||  
PT|process tomography|||1|1  
PT|proficiency testing|||1|0.0158|  
PT|pronator teres|C0224249|||C0224249|CHV;FMA;NCI;SNOMEDCT;UWDA|||1  
PT|protein|C0033684|||C0033684;C0555903;C1325816;C1521746|CHV;CSP;FMA;GO;LNC;NCI  
;NDFRT;SNOMEDCT;UWDA;VANDF|||  
PT|prothrombin|C0033706;C2828369|1|0.002|C0033706;C1414504;C2828369|AOD;CHV;CSP;  
LCH;LNC;MSH;MTH;NCI;NDFRT;OMIM;SNOMEDCT|1|0.0193|  
PT|prothrombin test|C0033707|||C0033707|CHV|||

PT|prothrombin  
time|C0033707|1|0.044|C0033707|AOD;CHV;CSP;MSH;MTH;NCI;SNOMEDCT|||1  
PT|prothrombin time (PT) test|C0033707;C0491338|||C0033707|CHV|||  
PT|prothrombin time test|C0033707;C0491338|||C0033707|CHV|||  
PT|prothrombin times|C0033707|||C0033707|CHV|||  
PT|proton transfer|||||1|0.0044|  
PT|proximal|C0205107|||||1|0.0035|  
PT|proximal tubular|||||1|0.0161|  
PT|proximal tubule|C0022677|||C0022677|AOD;CHV|1|0.0428|1  
PT|pseudotumor|C0033844|||||1|  
PT|psychasthenia|C0338900|||||1|  
PT|pt||||C0175252;C0560012|CHV;SNOMEDCT|||  
PT|ptaquiloside|C0072576|||C0072576|MSH|1|0.0029|  
PT|pulmonary thrombosis|C0151946|||||1|  
PT|pulmonary toilet|||||1|  
PT|pulmonary trunk|C0034052|||C0034052|CHV;FMA;NCI;SNOMEDCT;UWDA|1|0.0041|1  
PT|pulmonary  
tuberculosis|C0041327|||C0041327|AOD;CHV;ICD9CM;MSH;NCI;NDFRT;SNOMEDCT|1|0.0076|  
1  
PT|pure tone|||||1|  
PT|putamen|C0034169;C1281335|||C0034169;C1281335|AOD;CHV;CSP;FMA;MSH;NCI;SNOMEDCT|||  
PT|pyramidal tract|C0034229|||C0034229|CHV;CSP;FMA;LCH;MSH;SNOMEDCT|1|0.0246|1  
PT|pyrithiamine|C0034294|||C0034294|AOD;MSH;NDFRT|||  
PT|temporal plane|C1184151|||||1|  
PT|tests|C0022885;C0392366|||||1|0.0035|  
PT|therapy physical||||C0949766|CHV|||  
PT|tissue|C0040300;C1547928|||||1|0.0029|  
PT|tracheal pressure|||||1|0.0059|  
PT|treatment|C0039798;C0087111;C1522326;C1533734;C1705169;C3161471|||||1|0.0044|  
PT|treatment physical therapy|C0949766|||C0949766|CHV|||  
PT|tumor stage|C1300072|||||1|0.002|  
PT|tumors|C0027651|||||1|0.005|  
PT|twitch force|||||1|0.0023|  
PTSD|Combat fatigue|C0038436|||C0038436|SNOMEDCT|||  
PTSD|Combat fatigue (disorder)|||C0038436|SNOMEDCT|||  
PTSD|Neuroses, Post Traumatic|C0038436|||C0038436|MSH|||  
PTSD|Neuroses, Post-Traumatic|C0038436|||C0038436|MSH;NDFRT|||  
PTSD|Neuroses, Posttraumatic|C0038436|||C0038436|MSH;NDFRT|||  
PTSD|POST TRAUMATIC STRESS DIS|||C0038436|MSH|||  
PTSD|POST TRAUMATIC STRESS DISORDER|C0038436|||C0038436|COSTAR|||  
PTSD|POSTTRAUMATIC STRESS DIS|||C0038436|MSH|||  
PTSD|POSTTRAUMATIC STRESS DISORDERS|C0038436|||C0038436|MSH|||  
PTSD|PTSD|C0038436|||C0038436|AOD;CHV;CSP;MEDLINEPLUS;MSH;NCI;NDFRT;PDQ|||  
PTSD|PTSD - Post-traumatic stress disorder|C0038436|||C0038436|SNOMEDCT|||  
PTSD|Post Traumatic Stress Disorders|C0038436|||C0038436|MSH|||  
PTSD|Post-Traumatic Neuroses|C0038436|||C0038436|MSH|||  
PTSD|Post-Traumatic Stress  
Disorder|C0038436|||C0038436|MEDLINEPLUS;MSH;MTH;NCI|||  
PTSD|Post-Traumatic Stress Disorder (PTSD)|C0038436|||C0038436|MTHICD9|||  
PTSD|Post-Traumatic Stress Disorders|C0038436|||C0038436|MSH;NDFRT|||  
PTSD|Post-traumatic stress disorder|C0038436|||C0038436|SNOMEDCT|||  
PTSD|Post-traumatic stress disorder (disorder)|||C0038436|SNOMEDCT|||  
PTSD|Post-traumatic stress syndrome|C0038436|||C0038436|SNOMEDCT|||  
PTSD|Posttraumatic Neuroses|C0038436|||C0038436|MSH|||  
PTSD|Posttraumatic Stress Disorder|C0038436|||C0038436|MSH|||  
PTSD|Posttraumatic Stress Disorders|C0038436|||C0038436|MSH;NDFRT|||

PTSD|Posttraumatic stress dis||||C0038436|ICD9CM|||  
PTSD|Posttraumatic stress disorder|C0038436|||C0038436|ICD9CM;SNOMEDCT|||  
PTSD|Posttraumatic stress disorder (disorder)|||C0038436|SNOMEDCT|||  
PTSD|Posttraumatic stress disorder NOS|C0038436|||C0038436|MTHICD9|||  
PTSD|Posttraumatic stress disorder, NOS|C0038436|||C0038436|SNOMEDCT|||  
PTSD|STRESS DIS POST TRAUMATIC|||C0038436|MSH|||  
PTSD|STRESS DIS POSTTRAUMATIC|||C0038436|MSH|||  
PTSD|Stress Disorder, Post Traumatic|C0038436|||C0038436|MSH;NDFRT|||  
PTSD|Stress Disorder, Post-Traumatic|C0038436|||C0038436|MSH|||  
PTSD|Stress Disorder, Posttraumatic|C0038436|||C0038436|MSH|||  
PTSD|Stress Disorders, Post Traumatic|C0038436|||C0038436|MSH|||  
PTSD|Stress Disorders, Post-Traumatic|C0038436|||C0038436|MSH;NDFRT|||  
PTSD|Stress Disorders, Post-Traumatic [Disease/Finding]|||C0038436|NDFRT|||  
PTSD|Stress Disorders, Posttraumatic|C0038436|||C0038436|MSH;NDFRT|||  
PTSD|Traumatic neuroses|C0038436|||C0038436|LCH|||  
PTSD|Traumatic neurosis|C0038436|||C0038436|SNOMEDCT|||  
PTSD|[X]Combat fatigue|||C0038436|SNOMEDCT|||  
PTSD|battle fatigue|C0038436|||C0038436|CHV|||  
PTSD|combat fatigue|C0038436|||C0038436|AOD;CSP|||  
PTSD|disorder, post-traumatic stress|C0038436|||C0038436|NCI;PDQ|||  
PTSD|post traumatic stress disorder|C0038436|||C0038436|CHV|||  
PTSD|post traumatic stress disorders|C0038436|||C0038436|CHV|||  
PTSD|post traumatic stress syndrome|C0038436|||C0038436|CHV|||  
PTSD|post-traumatic stress  
disorder|C0038436|||C0038436|CHV;LNC;NCI;PDQ|1|0.2747|  
PTSD|post-traumatic stress disorder (PTSD)|C0038436|||C0038436|CHV|||  
PTSD|post-traumatic stress disorders|C0038436|||C0038436|CHV|||  
PTSD|post-traumatic stress syndrome|C0038436|||C0038436|CHV|||  
PTSD|posttraumatic stress  
disorder|C0038436|1|1.000|C0038436|AOD;CHV;CSP;ICD9CM;MSH;SNOMEDCT|1|0.7253|1|  
PTSD|posttraumatic stress disorders|C0038436|||C0038436|CHV|||  
PTSD|traumatic neurosis|C0038436|||C0038436|CSP|||  
PTT|2beta-propanoyl-3beta-(4-tolyl)-tropane|||||1|0.0662|  
PTT|APTT|C0030605|||C0030605|MSH;MTH;NCI;SNOMEDCT|||  
PTT|APTT - Activated partial thromboplastin time|C0030605|||C0030605|SNOMEDCT|||  
PTT|Activated Partial Thromboplastin Time|C0030605|||C0030605|MSH;NCI|||  
PTT|Activated Partial Thromboplastin Time (APTT) test|||C0030605|CHV|||  
PTT|Activated Partial Thromboplastin Time measurement|C0030605|||C0030605|MTH|||  
PTT|Activated partial thromboplastin time|C0030605|||C0030605|SNOMEDCT|||  
PTT|Activated partial thromboplastin time (procedure)|||C0030605|SNOMEDCT|||  
PTT|PTT|C0030605|||C0030605|AOD;MSH;MTH;NCI;SNOMEDCT|||  
PTT|PTT - Partial thromboplastin time|C0030605|||C0030605|SNOMEDCT|||  
PTT|PTT assay|||C0030605|SNOMEDCT|||  
PTT|PTT, activated|C0030605|||C0030605|SNOMEDCT|||  
PTT|Partial Thromboplastin Time|C0030605|||C0030605|MSH;MTH;NCI|||  
PTT|Partial thromboplastin time activated|||C0030605|SNOMEDCT|||  
PTT|Partial thromboplastin time activated (procedure)|||C0030605|SNOMEDCT|||  
PTT|Partial thromboplastin time, activated|C0030605|||C0030605|SNOMEDCT|||  
PTT|Partial thromboplastin time, activated (procedure)|||C0030605|SNOMEDCT|||  
PTT|Thromboplastin Time, Partial|C0030605|||C0030605|MSH|||  
PTT|aPTT|C0030605|||C0030605|NCI|||  
PTT|activated ptt|C0030605|||C0030605|CHV|||  
PTT|aptt|C0030605|||C0030605|CHV|||  
PTT|partial thromboplastin|||||1|0.0464|  
PTT|partial thromboplastin  
time|C0030605|1|1.000|C0030605|AOD;CHV;MSH;MTH;NCI|||1|  
PTT|partial thromboplastin time: PTT|||C0030605|MTH|||

PTT|particle transport time|||||||1  
PTT|patellar tendon transfer|||||||1  
PTT|pharyngeal transit time|||||||1  
PTT|platelet transfusion therapy|||||||1  
PTT|poly(trimethylene terephthalate)|C1567176|||C1567176|MSH|||  
PTT|posterior tibial tendinitis|C0554595|||||||1  
PTT|posterior tibial tendon|||||||1|0.106|1  
PTT|posterior tibial transfer|||||||1  
PTT|protein truncation test|C2737268|||C2737268|LNC|1|0.7219|1  
PTT|protein truncation testing|||||||1  
PTT|pulmonary transit time|||||||1  
PTT|pulse transit time|||||||1  
PTT|pure tone threshold|||||||1  
PTT|threshold|C0449864|||||1|0.0596|  
PVC|CDDP/CTX/VP-16|||C0280556|NCI;PDQ|||  
PVC|CEP|||C0280556|PDQ|||  
PVC|CVP|C0056633;C0280556|||C0280556|NCI;PDQ|||  
PVC|Chlorethylene polymer|C0032624|||C0032624|SNOMEDCT|||  
PVC|Chloride, Polyvinyl|C0032624|||C0032624|MSH|||  
PVC|Chloroethylene Homopolymer|C0032624|||C0032624|MSH;NDFRT|||  
PVC|Chloroethylene Polymer|C0032624|||C0032624|MSH;NDFRT|||  
PVC|Chloroethylene polymer|C0032624|||C0032624|SNOMEDCT|||  
PVC|Cisplatin/Cyclophosphamide/Etoposide|||C0280556|NCI|||  
PVC|ECTOPIC BEATS (VENTRICULAR)|||C0151636|COSTAR|||  
PVC|EXTRASYSTOLES VENTRICULAR|||C0151636|CST|||  
PVC|Ectopic Beat, Ventricular|C0151636|||C0151636|MSH|||  
PVC|Ectopic Beats, Ventricular|C0151636|||C0151636|MSH|||  
PVC|Ethene, chloro-, homopolymer|C0032624|||C0032624|MSH;NDFRT|||  
PVC|Extrasystole, Ventricular|C0151636|||C0151636|MSH;NDFRT|||  
PVC|Homopolymer, Chloroethylene|C0032624|||C0032624|MSH|||  
PVC|Late Endosome|C1166848|||C1166848|NCI|||  
PVC|Late Endosome|C1166848|||C1166848|FMA;UWDA|||  
PVC|PCE|C0246101;C0280556;C1588205|||C0280556|NCI;PDQ|||  
PVC|POLYVINYL CHLORIDE|C0032624|||C0032624|NDFRT;VANDF|||  
PVC|PREMATURE VENTRICULAR BEATS|C0151636|||C0151636|COSTAR|||  
PVC|PREMATURE VENTRICULAR COMPLEX|C0151636|||C0151636|NCI|||  
PVC|PREMATURE VENTRICULAR CONTRACTION|C0151636|||C0151636|COSTAR;DXP|||  
PVC|PREMATURE VENTRICULAR CONTRACTIONS|C0151636;C0488307|||C0151636|CST|||  
PVC|PVC|C0151636|||C0032624;C0151636;C0280556;C1166848|CHV;CSP;DXP;GO;MSH;NCI;ND  
FRT;PDQ;SNOMEDCT|||  
PVC|PVC (polyvinylchloride)|||C0032624|CSP|||  
PVC|PVC - Polyvinyl chloride|C0032624|||C0032624|SNOMEDCT|||  
PVC|PVC'S|C0151636|||C0151636|CST|||  
PVC|Polychloroethylene|C0032624|||C0032624|MSH;NDFRT|||  
PVC|Polymer, Chloroethylene|C0032624|||C0032624|MSH|||  
PVC|Polymer, Vinyl Chloride|C0032624|||C0032624|MSH|||  
PVC|Polyvinyl Chloride|C0032624|||C0032624|MSH;MTH;NDFRT|||  
PVC|Polyvinyl Chloride [Chemical/Ingredient]|||C0032624|NDFRT|||  
PVC|Polyvinyl chloride|C0032624|||C0032624|LCH;SNOMEDCT|||  
PVC|Polyvinyl chloride (substance)|||C0032624|SNOMEDCT|||  
PVC|Premature Ventricular Beat|C0151636|||C0151636|MSH|||  
PVC|Premature Ventricular Beats|C0151636|||C0151636|MSH;NDFRT|||  
PVC|Premature Ventricular Complex|C0151636|||C0151636|MSH;NCI;NDFRT|||  
PVC|Premature Ventricular Contraction|C0151636|||C0151636|MSH|||  
PVC|Premature Ventricular Contractions|C0151636;C0488307|||C0151636|MSH;NDFRT|||  
PVC|Premature ventricular complex|C0151636|||C0151636|SNOMEDCT|||  
PVC|Premature ventricular contractions|C0151636;C0488307|||C0151636|LNC;MTH|||

PVC|VCP-1|C0280556|||C0280556|NCI;PDQ|||  
PVC|VENTRICULAR BEAT PREMATURE|||C0151636|DXP|||  
PVC|VENTRICULAR CONTRACTIONS PREMATURE|||C0151636|CST|||  
PVC|VENTRICULAR EXTRASYSTOLES|C0151636|||C0151636|CST|||  
PVC|VPB|C0151636;C0279462|||C0151636|DXP|||  
PVC|VPC|C0151636|||C0151636|DXP;NCI|||  
PVC|VPC'S|C0151636|||C0151636|CST|||  
PVC|Ventricular Beat, Premature|C0151636|||C0151636|MSH|||  
PVC|Ventricular Beats, Premature|C0151636|||C0151636|MSH|||  
PVC|Ventricular Complex, Premature|C0151636|||C0151636|MSH|||  
PVC|Ventricular Contraction, Premature|C0151636|||C0151636|MSH|||  
PVC|Ventricular Contractions, Premature|C0151636;C0488307|||C0151636|MSH|||  
PVC|Ventricular Ectopic Beat|C0151636|||C0151636|MSH|||  
PVC|Ventricular Ectopic Beats|C0151636|||C0151636|MSH;NDFRT|||  
PVC|Ventricular Extrasystole|C0151636|||C0151636|MSH|||  
PVC|Ventricular Extrasystoles|C0151636|||C0151636|MSH|||  
PVC|Ventricular Premature Complex|C0151636|||C0151636|MSH;NCI;NDFRT|||  
PVC|Ventricular Premature Complexes|C0151636|||C0151636|MSH;NDFRT|||  
PVC|Ventricular Premature Complexes [Disease/Finding]|||C0151636|NDFRT|||  
PVC|Ventricular ectopic beats|C0151636|||C0151636|SNOMEDCT|||  
PVC|Ventricular ectopic beats (disorder)|||C0151636|SNOMEDCT|||  
PVC|Ventricular ectopic beats (finding)|||C0151636|SNOMEDCT|||  
PVC|Ventricular ectopic complex|C0151636|||C0151636|SNOMEDCT|||  
PVC|Ventricular ectopics|C0151636;C0488470|||C0151636|LNC|||  
PVC|Ventricular extrasystoles|C0151636|||C0151636|SNOMEDCT|||  
PVC|Ventricular premature beats|C0151636|||C0151636|SNOMEDCT|||  
PVC|Ventricular premature beats (disorder)|||C0151636|SNOMEDCT|||  
PVC|Ventricular premature complex|C0151636|||C0151636|SNOMEDCT|||  
PVC|Ventricular premature complex (disorder)|||C0151636|SNOMEDCT|||  
PVC|Ventricular premature contractions|C0151636|||C0151636|SNOMEDCT|||  
PVC|Ventricular premature depolarisation|C0151636|||C0151636|SNOMEDCT|||  
PVC|Ventricular premature depolarization|C0151636|||C0151636|SNOMEDCT|||  
PVC|Ventricular premature systoles|C0151636|||C0151636|SNOMEDCT|||  
PVC|Vinyl|C0032624|||C0032624|SNOMEDCT|||  
PVC|Vinyl Chloride Polymer|C0032624|||C0032624|MSH;NDFRT|||  
PVC|cisplatin/cyclophosphamide/etoposide|||C0280556|PDQ|||  
PVC|cisplatin/cyclophosphamide/etoposide protocol|C0280556|||C0280556|MTH|||  
PVC|late endosome|C1166848|||C1166848|GO;MTH|||  
PVC|paravestibular canaliculus|||1|0.0122|  
PVC|peripheral venous catheterization|C0031127|||1|  
PVC|persistent vaginal cornification|||1|  
PVC|polyethylene vacuum cup|||1|  
PVC|polyvinyl chloride|C0032624|||C0032624|CHV|1|0.5834|1|  
PVC|polyvinylchloride|C0032624|||C0032624|CSP|1|0.2117|  
PVC|porcelain veneer crown|||1|  
PVC|postvoiding cystogram|||1|  
PVC|predicted vital capacity|||1|  
PVC|premature ventricular beat|C0151636|||C0151636|CHV|||  
PVC|premature ventricular beats|C0151636|||C0151636|CHV|||  
PVC|premature ventricular complex|C0151636|||C0151636|CHV;MSH;NCI;NDFRT;SNOMEDCT|||1|  
PVC|premature ventricular complexes|C0151636|||C0151636|CHV|1|0.0461|  
PVC|premature ventricular contraction|C0151636|1|0.998|C0151636|COSTAR;CSP;DXP;MSH|||1|  
PVC|premature ventricular contractions|C0151636;C0488307|||1|0.1194|  
PVC|prevacuolar compartment|C1166848|||C1166848|GO|1|0.0109|  
PVC|primary visual cortex|C0038446;C2336068|||C0038446;C2336068|FMA;SNOMEDCT|||1|



RAP|LOW DENSITY LIPOPROTEIN RECEPTOR-RELATED PROTEIN-ASSOCIATED PROTEIN  
1|||C1416920|OMIM|||  
RAP|LRPAP1|C1416920|||C1416920|HUGO;OMIM|||  
RAP|LRPAP1 gene|C1416920|||C1416920|HUGO;MTH|||  
RAP|MRAP|C1416920;C1537935|||C1416920|OMIM|||  
RAP|RAP|C1416920|||C1416920|OMIM|||  
RAP|RNAIII activating protein|||||||1  
RAP|Rehabilitation Activities Profile|||||1|0.012|  
RAP|Relative Aspects of Potential|||||||1  
RAP|atrial pacing|||||1|0.0285|  
RAP|low density lipoprotein receptor-related protein associated protein  
1|||C1416920|HUGO|||  
RAP|rapamycin|C0072980|||C0072980|CHV;CSP;MSH;NCI;NDFRT;PDQ;SNOMEDCT|1|0.072|  
RAP|receptor-associated protein|||||1|0.2909|1  
RAP|recurrent abdominal pain|C2585575|||C2585575|OMIM;SNOMEDCT|1|0.1424|1  
RAP|recurrent acute pancreatitis|C0267937|||C0267937|SNOMEDCT|||  
RAP|regional acceleratory phenomenon|||||1|0.0165|  
RAP|regression-associated protein|||||||1  
RAP|relative average perturbation|||||||1  
RAP|remote access perfusion|||||||1  
RAP|renal arterial pressure|||||1|0.069|  
RAP|renal artery pressure|||||||1  
RAP|renal artery pseudoaneurysm|||||||1  
RAP|resistance-area product|||||1|0.0075|  
RAP|retinal angiomatous proliferation|||||1|0.015|  
RAP|rheumatoid arthritis precipitin|||||||1  
RAP|right abdominal pain|||||||1  
RAP|right atrial|||||1|0.0225|  
RAP|right atrial pressure|C0456165|1|1.000|C0456165|CHV;SNOMEDCT|1|0.3238|1  
RAP|robot-assisted laparoscopy|||||||1  
RA|ANEMIA REFRACTORY|||C0002893|CST|||  
RA|ANEMIA, REFRACTORY|C0002893;C2981142|||C0002893|DXP|||  
RA|ARTHRITIS RHEUMATOID|||C0003873|CST|||  
RA|ARTHRITIS, RHEUMATIC|C0003873;C0035436|||C0003873|DXP|||  
RA|ARTHRITIS, RHEUMATOID|C0003873;C2697391|||C0003873|DXP;NCI|||  
RA|Anemia, Refractory|C0002893;C2981142|||C0002893|MSH;NDFRT|||  
RA|Anemia, Refractory [Disease/Finding]|||C0002893|NDFRT|||  
RA|Anemias, Refractory|C0002893|||C0002893|MSH|||  
RA|Aregenerative Anemia|C0002893;C0553669|||C0002893|NCI|||  
RA|Arthritis or polyarthritis, atrophic|||C0003873|MTHICD9|||  
RA|Arthritis or polyarthritis, rheumatic|||C0003873|MTHICD9|||  
RA|Arthritis, Rheumatoid|C0003873;C2697391|||C0003873|MSH;NDFRT|||  
RA|Arthritis, Rheumatoid [Disease/Finding]|||C0003873|NDFRT|||  
RA|Atrophic Arthritis|C0003873|||C0003873|NCI|||  
RA|Atrophic arthritis|C0003873|||C0003873|SNOMEDCT|||  
RA|Chronic rheumatic arthritis|C0003873|||C0003873|SNOMEDCT|||  
RA|IL-1 receptor antagonist|||||1|0.0028|  
RA|RA|||C0002893;C0003873;C0034571|MEDLINEPLUS;MSH;NCI;OMIM|||  
RA|RA - Rheumatoid arthritis|C0003873|||C0003873|SNOMEDCT|||  
RA|RADIOGR|||C0034571|MSH|||  
RA|REFRACTORY ANEMIA|C0002893;C2981142|||C0002893|CST|||  
RA|RHEUMATOID  
ARTHRITIS|C0003873;C2697391|||C0003873|COSTAR;CST;DXP;NCI;OMIM;QMR|||  
RA|RHEUMATOID ARTHRITIS, SUSCEPTIBILITY TO|||C0003873|OMIM|||  
RA|Ra|||C0034625|NCI|||  
RA|Radionuclide angiography|C0034604|||||1|0.0005|  
RA|Radium|C0034625|||C0034625|LCH;MSH;MTH;NCI;NDFRT;SNOMEDCT|||

RA|Radium (substance)|||C0034625|SNOMEDCT|||  
RA|Radium [Chemical/Ingredient]|||C0034625|NDFRT|||  
RA|Radium, NOS|C0034625||C0034625|SNOMEDCT|||  
RA|Rayleigh number|||1  
RA|Refractory Anemia|C0002893;C2981142||C0002893|MSH;NCI;NDFRT|||  
RA|Refractory Anemias|C0002893||C0002893|MSH|||  
RA|Refractory anaemia|C0002893;C2981142||C0002893|SNOMEDCT|||  
RA|Refractory anaemia (disorder)|||C0002893|SNOMEDCT|||  
RA|Refractory anaemia -RETIRED-|||C0002893|SNOMEDCT|||  
RA|Refractory anemia|C0002893;C2981142||C0002893|SNOMEDCT|1|0.0139|  
RA|Refractory anemia (RA)|C0002893;C2981142||C0002893|MTHICD9|||  
RA|Refractory anemia (disorder)|||C0002893|SNOMEDCT|||  
RA|Refractory anemia (morphologic abnormality)|||C0002893|SNOMEDCT|||  
RA|Refractory anemia -RETIRED-|||C0002893|SNOMEDCT|||  
RA|Refractory anemia, NOS|C0002893;C2981142||C0002893|SNOMEDCT|||  
RA|Refractory anemias|C0002893||C0002893|MTH|||  
RA|Renin activity|C1150120|||1|0.001|  
RA|Renin-angiotensin|||1|0.002|  
RA|Repeated acquisition|||1|0.0004|  
RA|Retinol acetate|C0073109|||1|0.0005|  
RA|RhA - Rheumatoid arthritis|C0003873||C0003873|SNOMEDCT|||  
RA|Rheumatic gout|C0003873||C0003873|SNOMEDCT|||  
RA|Rheumatoid  
Arthritis|C0003873;C2697391||C0003873|AIR;MEDLINEPLUS;MSH;MTH;NCI;NDFRT|||  
RA|Rheumatoid arthritis|C0003873;C2697391||C0003873|AIR;ICD9CM;LNC;SNOMEDCT|||  
RA|Rheumatoid arthritis (disorder)|||C0003873|SNOMEDCT|||  
RA|Rheumatoid arthritis NOS|C0003873;C2697391||C0003873|SNOMEDCT|||  
RA|Rheumatoid arthritis NOS (disorder)|||C0003873|SNOMEDCT|||  
RA|Rheumatoid disease|C0003873||C0003873|SNOMEDCT|||  
RA|Risk assessment|C0086930|||1|0.0007|  
RA|Rokitansky-Aschoff|||1  
RA|X-ray|C0034571;C0043299;C0043309;C1306645;C1962945||C0034571|MSH|||  
RA|X-ray diagnosis|C0034571;C1578656||C0034571|MSH|||  
RA|X-ray image|C0034571||C0034571|MSH|||  
RA|afferent|C0205115|||1|0.0008|  
RA|afferent arteriolar resistance|||1|0.0008|  
RA|airway resistance|C0001884||C0001884|AOD;CHV;MSH;SNOMEDCT|||  
RA|amplitude|C2346753|||1|0.0005|  
RA|analysis|C0002778;C0936012;C1524024|||1|0.0005|  
RA|anemia refractory|||C0002893|CHV|||  
RA|appearance rate|||1|0.0015|  
RA|arterial|C0003842;C0221464|||1|0.0009|  
RA|arterial resistance|C0429119|||1|0.0007|  
RA|atrophic arthritis|C0003873||C0003873|CHV|||  
RA|glucose production|||1|0.0051|  
RA|gout rheumatic|C0003873||C0003873|CHV|||  
RA|nucleus robustus archistriatalis|||1|0.0019|  
RA|proliferative arthritis|C0003873;C1306838||C0003873|CHV|||  
RA|radial artery|C0162857;C1278948|||1|0.0071|1  
RA|radioactive|C0034553;C1514697;C1548770;C1550589||C0034553;C1514697;C1548770;  
C1550589|HL7V2.5;HL7V3.0;MTH;NCI|||1  
RA|radioactivity|C0034553||C0034553|AOD;CHV;LCH;LNC;MSH;NCI;SNOMEDCT|||  
RA|radiographic absorptiometry|||1|0.0013|1  
RA|radiography|C0034571;C0043299;C1962945||C0034571|MSH|||  
RA|radionuclide angiogram|||1  
RA|radionuclide angiograph|||1  
RA|radionuclide angiography|C0034604||C0034604|CHV;MSH|||1

RA|radium|C0034625|||C0034625|AOD;CHV|||1  
RA|ragged|||1|0.0006|  
RA|ragocyte|C0333833|||1|  
RA|ragweed antigen|||1|  
RA|rales|C0034642;C0240859|||1|  
RA|rapidly adapting|||1|0.0045|  
RA|rat aorta|C1882561|||1|0.0005|  
RA|rate of appearance|||1|0.0083|  
RA|rates|||1|0.0006|  
RA|rates of glucose appearance|||1|0.0018|  
RA|reactive arthritis|C0085435|||1|  
RA|reading age|||1|  
RA|readmission|C1548168|||1|  
RA|reciprocal asymmetrical|||1|  
RA|rectus abdominis|C0206066;C1305918|||1|0.0029|  
RA|refractory anaemia|C0002893;C2981142|||C0002893|CHV|1|0.0054|  
RA|refractory  
anemia|C0002893;C2981142|||C0002893;C2981142|CHV;CST;MSH;NCI;NDFRT;PDQ;SNOMEDCT|  
||1|  
RA|refractory anemias|C0002893|||C0002893|CHV|||  
RA|refractory ascites|||1|  
RA|regional anaesthesia|C0002911|||1|0.0006|  
RA|regional anesthesia|C0002911|||1|0.0006|1|  
RA|relative anisotropy|||1|0.001|  
RA|remittance advice|||1|  
RA|renal  
artery|C0035065;C1278951|||C0035065;C1278951|AOD;CHV;CSP;FMA;LCH;LNC;MSH;NCI;SNO  
MEDCT;UWDA|1|0.0027|1|  
RA|renin activity|C1150120|||C1150120|CHV;GO;MTH|||1|  
RA|renin-angiotensin|||1|  
RA|repeat action|||1|  
RA|residual air|||1|  
RA|resistance to reabsorption of CSF|||1|0.0006|  
RA|retinoic  
acid|C0040845|1|0.002|C0040845|AOD;CHV;MSH;NCI;NDFRT;PDQ;SNOMEDCT|1|0.1878|1|  
RA|retinyl acetate|C0073109|||1|0.0015|  
RA|retrograde amnesia|C0002624|||1|0.0011|  
RA|rheumatic arthritis|C0003873;C0035436|||C0035436|MSH;NDFRT|||  
RA|rheumatoid|||1|0.0023|  
RA|rheumatoid agglutinin|||1|  
RA|rheumatoid arthritic|||1|0.0013|  
RA|rheumatoid  
arthritis|C0003873;C2697391|1|0.132|C0003873;C2697391|AIR;AOD;CHV;COSTAR;CSP;CST  
;DXP;ICD9CM;LNC;MEDLINEPLUS;MSH;MTH;NCI;NDFRT;OMIM;QMR;SNOMEDCT|1|0.6896|1|  
RA|rheumatoid arthritis patients|||1|0.0006|  
RA|rheumatoid arthritis systemic|||C0003873|CHV|||  
RA|rhinocerebral aspergillosis|||1|  
RA|rhodotorulic acid|C0073212|||C0073212|MSH|||  
RA|riboadenylate|||1|  
RA|ricin A chain|C0035570|||1|0.0005|  
RA|right|C0205090|||1|0.0007|  
RA|right angle|||1|  
RA|right  
arm|C0230346;C1268255|||C0230346;C1268255|CHV;FMA;HL7V2.5;SNOMEDCT;UWDA|||1|  
RA|right atria|||1|0.0008|  
RA|right atrial|||1|0.0118|1|  
RA|right atrial pressure|C0456165|||1|0.0006|

RA|right  
atrium|C0225844;C1269890|1|0.788|C0225844;C1269890|AOD;CHV;FMA;MSH;NCI;SNOMEDCT;  
UWDA|1|0.0129|1  
RA|right auricle|C0225845|||C0225845|FMA;UWDA|||1  
RA|risk area|||||1|0.0006|  
RA|robust nucleus of the archistriatum|||||1|0.0057|  
RA|roentgenographic|C0034571|||C0034571|MTH|||  
RA|roentgenography|C0034571;C0043299;C1306645;C1962945|||C0034571|MSH|||  
RA|room air||1|0.072|||1|0.0034|1  
RA|rotational angiography|||||1|  
RA|rotational atherectomy|C0162655|||1|0.0017|1  
RA|rounded atelectasis|C2062952|||1|0.0007|  
RA|surface roughness|||||1|0.0033|  
RBC|Anucleate erythrocyte|C0014792|||C0014792|FMA|||  
RBC|Blood Cell Count, Red|C0014772;C1287262|||C0014772|MSH|||  
RBC|Blood Cell, Red|C0014792|||C0014792|MSH|||  
RBC|Blood Cells, Red|C0014772;C0014792;C0439179;C1277078|||C0014792|MSH|||  
RBC|Blood Corpuscle, Red|C0014792|||C0014792|MSH|||  
RBC|Blood Corpuscles, Red|C0014792|||C0014792|MSH|||  
RBC|Corpuscle, Red Blood|C0014792|||C0014792|MSH|||  
RBC|Corpuscles, Red Blood|C0014792|||C0014792|MSH|||  
RBC|Count, Erythrocyte|C0014772|||C0014772|MSH|||  
RBC|Counts, Erythrocyte|||C0014772|MSH|||  
RBC|Erythrocyte|C0014792|||C0014792|FMA;LNC;MSH;NCI;SNOMEDCT;UWDA|||  
RBC|Erythrocyte (cell)|||C0014792|SNOMEDCT|||  
RBC|Erythrocyte Count|C0014772|||C0014772|MSH;NCI|||  
RBC|Erythrocyte Counts|||C0014772|MSH|||  
RBC|Erythrocyte Number|C0014772|||C0014772|MSH|||  
RBC|Erythrocyte Numbers|C0014772|||C0014772|MSH|||  
RBC|Erythrocyte, NOS|C0014792|||C0014792|SNOMEDCT|||  
RBC|Erythrocytes|C0014772;C0014792|||C0014772;C0014792|LCH;LNC;MSH;MTH;NCI|||  
RBC|RBC|C0014772;C0014792|||C0014772;C0014792|AOD;CHV;CSP;LNC;NCI;SNOMEDCT|||  
RBC|RBC - Red blood cell|C0014792|||C0014792|SNOMEDCT|||  
RBC|RBC - Red blood cell count|C0014772|||C0014772|SNOMEDCT|||  
RBC|RBC count|C0014772|||C0014772|SNOMEDCT|||  
RBC|RBC count NOS|C0014772|||C0014772|SNOMEDCT|||  
RBC|RBC count NOS (procedure)|||C0014772|SNOMEDCT|||  
RBC|Ranitidine bismuth citrate|C0139919|||1|0.0153|  
RBC|Red Blood Cell|C0014792|||C0014792|MSH|||  
RBC|Red Blood Cell Count|C0014772;C1287262|||C0014772|MSH;NCI|||  
RBC|Red Blood Cell Count measurement|C0014772|||C0014772|MTH|||  
RBC|Red Blood  
Cells|C0014772;C0014792;C0439179;C1277078|||C0014772;C0014792|HL7V2.5;MSH;NCI|||  
RBC|Red Blood Corpuscle|C0014792|||C0014792|MSH|||  
RBC|Red Blood Corpuscles|C0014792|||C0014792|MSH|||  
RBC|Red Cell|C0014792|||C0014792|NCI|||  
RBC|Red Cell Count|C0014772|||C0014772|NCI|||  
RBC|Red blood cell|C0014792|||C0014792|FMA;SNOMEDCT;UWDA|||  
RBC|Red blood cell (cell)|||C0014792|SNOMEDCT|||  
RBC|Red blood cell count|C0014772;C1287262|||C0014772|SNOMEDCT|||  
RBC|Red blood cell count (procedure)|||C0014772|SNOMEDCT|||  
RBC|Red blood cell count NOS|C0014772;C1287262|||C0014772|SNOMEDCT|||  
RBC|Red blood cell count NOS (procedure)|||C0014772|SNOMEDCT|||  
RBC|Red blood cells|C0014772;C0014792;C0439179;C1277078|||C0014792|SNOMEDCT|||  
RBC|Red blood corpuscle|C0014792|||C0014792|FMA;UWDA|||  
RBC|Red blood corpuscle|C0014792|||C0014792|SNOMEDCT|||  
RBC|Red cells|C0014792|||C0014792|SNOMEDCT|||

RBC|Reticuloendothelial System, Erythrocytes|C0014792|||C0014792|NCI|||  
RBC|Rotating Biological Contactor|||1|0.0058|  
RBC|blood cell count red|C0014772;C1287262|||C0014772|CHV|||  
RBC|blood cell counts red|||C0014772|CHV|||  
RBC|blood cells count red|||C0014772|CHV|||  
RBC|blood cells rbc red|C0014792|||C0014792|CHV|||  
RBC|blood corpuscle|C0005773;C0014792|||C0014792|CHV|||  
RBC|blood corpuscles red|||C0014792|CHV|||  
RBC|blood erythrocytes|C0014792|||C0014792|CHV|||  
RBC|bloods cells red|||C0014792|CHV|||  
RBC|cell red blood count|C0014772;C1287262|||C0014772|CHV|||  
RBC|cells red blood|C0014792|||C0014792|CHV|||  
RBC|count rbc|C0014772|||C0014772|CHV|||  
RBC|count rbcs|C0014772|||C0014772|CHV|||  
RBC|counting rbc|C0014772|||C0014772|CHV|||  
RBC|counts rbc|||C0014772|CHV|||  
RBC|erythrocyte|C0014792|||C0014792|CHV;CSP;NCI|||  
RBC|erythrocyte count|C0014772|||C0014772|AOD;CHV;CSP;MTH|1|0.0051|  
RBC|erythrocytes|C0014772;C0014792|||C0014792|AOD;CHV|||  
RBC|erythrocytic|C0014792|||C0014792|CHV|||  
RBC|human erythrocytes|||1|0.0127|  
RBC|rbc count|C0014772|||C0014772|CHV|||  
RBC|rbcs|C0014792|||C0014792|CHV|||  
RBC|red blood cell|C0014792|1|1.000|C0014792|AOD;CHV;CSP;NCI|1|0.9306|1  
RBC|red blood cell count|C0014772;C1287262|||C0014772|AOD;CHV|1|0.0214|  
RBC|red blood cells|C0014772;C0014792;C0439179;C1277078|||C0014792|CHV|||  
RBC|red blood corpuscle|C0014792|||C0014792|CHV;FMA;MSH;UWDA|||  
RBC|red cell blood count|C0014772;C1287262|||C0014772|CHV|||  
RBC|resin-based composite|||1|0.0092|  
RCA|Raji cell assay|C0201454|||1|  
RCA|Ricinus Communis Agglutinin I|||1|0.0165|  
RCA|Ricinus communis|C0007341|||1|0.0189|  
RCA|Ricinus communis agglutinin|C0140570|||1|0.0979|  
RCA|RubisCO activase|||1|0.0106|  
RCA|complement activation|C0009528;C2984768|||1|0.0601|  
RCA|radiographic contrast agent|C2917425|||1|  
RCA|radionuclide cerebral angiogram|||1|  
RCA|reactive cutaneous angioendotheliomatosis|||1|  
RCA|red cell adherence|||1|  
RCA|red cell agglutination|||1|  
RCA|red cell aggregation|||1|0.0165|  
RCA|red cell aplasia|C0281963|||1|  
RCA|relative chemotactic activity|||1|  
RCA|renal cell  
carcinoma|C0007134;C2984311|||C0007134;C2984311|CHV;CSP;DXP;MSH;MTH;NCI;NDFRT;PD  
Q;QMR;SNOMEDCT|||1|  
RCA|replication-competent adenovirus|||1|0.0142|  
RCA|retained cortical activity|||1|  
RCA|retrochiasmatic area|C0262326|||1|0.0106|  
RCA|right carotid artery|||1|  
RCA|right coronary|||1|0.0165|  
RCA|right coronary angiography|||1|  
RCA|right coronary  
artery|C1261316|1|1.000|C1261316|CHV;FMA;HCPCS;NCI;SNOMEDCT;UWDA|1|0.6969|1  
RCA|rolling circle amplification|||1|0.0318|1  
RCA|root cause analysis|C3179036|||C3179036|MSH|1|0.0094|1  
RCA|rotational coronary atherectomy|C3161299|||1|

RDW|Erythrocyte Distribution Width Measurement|C0427460|||C0427460|NCI|||  
RDW|Erythrocyte distribution width|C0427460|||C0427460|LNC|||  
RDW|Erythrocytes Distribution Width|C0427460|||C0427460|NCI|||  
RDW|RDW|C0427460|||C0427460|NCI|||  
RDW|RDW - Red blood cell distribution width|C0427460|||C0427460|SNOMEDCT|||  
RDW|RDW determination|C0427460|||C0427460|SNOMEDCT|||  
RDW|Red blood cell distribution width|||C0427460|SNOMEDCT|||  
RDW|Red blood cell distribution width (& level)|||C0427460|SNOMEDCT|||  
RDW|Red blood cell distribution width (& level)  
(procedure)|||C0427460|SNOMEDCT|||  
RDW|Red blood cell distribution width (observable  
entity)|||C0427460|SNOMEDCT|||  
RDW|Red cell distribution width  
determination|C0427460|||C0427460|MTH;SNOMEDCT|||  
RDW|Red cell distribution width determination  
(procedure)|||C0427460|SNOMEDCT|||  
RDW|cell distribution red width|C0427460|||C0427460|CHV|||  
RDW|cells distribution red width|C0427460|||C0427460|CHV|||  
RDW|red cell distribution width|C0427460|||C0427460|CHV|1|1|  
RDW|red cell width distribution|C0427460|||C0427460|CHV|||  
RDW|red distribution width||1|1.000|||1|  
ROS|2,4-Thiazolidinedione, 5-004-02-(((methyl-2-  
pyridinylamino)ethoxy)phenyl)methyl)-|||C0289313|MSH;NDFRT|||  
ROS|5-((4-(2-methyl-2-(pyridinylamino)ethoxy)phenyl)methyl)-2,4-  
thiazolidinedione-2-butenedioate|||C0289313|MSH;NDFRT|||  
ROS|Active Oxygen|C0162772|||C0162772|MSH;NDFRT|||  
ROS|Active oxygen|C0162772|||C0162772|LCH|||  
ROS|Avian UR2 Sarcoma Virus Oncogene Homolog 1|C0812281|||C0812281|NCI|||  
ROS|MCF3|C0812281;C1709820|||C0812281|HUGO;OMIM|||  
ROS|ONCOGENE ROS|C0812281|||C0812281|OMIM|||  
ROS|Oncogene ROS|C0812281|||C0812281|NCI|||  
ROS|Oxygen Radical|C0162772|||C0162772|NCI|||  
ROS|Oxygen Radicals|C0162772|||C0162772|MSH;NCI;NDFRT|||  
ROS|Oxygen Species, Reactive|C0162772|||C0162772|MSH;NDFRT|||  
ROS|Oxygen, Active|C0162772|||C0162772|MSH|||  
ROS|Pro Oxidants|C0162772|||C0162772|MSH|||  
ROS|Pro-Oxidants|C0162772|||C0162772|MSH;NDFRT|||  
ROS|Pro-oxidant|C0162772|||C0162772|NCI|||  
ROS|ROS|C0162772;C0289313;C0489633;C0812281|||C0162772;C0289313;C0489633;C081228  
1|HUGO;NCI;OMIM;PDQ|||  
ROS|ROS1|C0216760;C0812281|||C0812281|HUGO;NCI;OMIM|||  
ROS|ROS1 Gene|C0812281|||C0812281|NCI|||  
ROS|ROS1 gene|C0812281|||C0812281|HUGO;MTH|||  
ROS|ROSIGLITAZONE|C0289313|||C0289313|NCI;NDFRT;VANDF|||  
ROS|Rat osteosarcoma|C1882806|||1|0.0032|  
ROS|Reactive Oxygen Species|C0162772|||C0162772|MSH;MTH;NCI;NDFRT|||  
ROS|Reactive Oxygen Species [Chemical/Ingredient]|||C0162772|NDFRT|||  
ROS|Review of Systems|C0488564;C0488565;C0489633|||C0489633|NCI|||  
ROS|Review of systems|C0488564;C0488565;C0489633|||C0489633|LNC;SNOMEDCT|||  
ROS|Review of systems (procedure)|C0489633|||C0489633|MTH;SNOMEDCT|||  
ROS|Rosiglitazone|C0289313|||C0289313|NCI;SNOMEDCT;USPMG|||  
ROS|Rosiglitazone (product)|||C0289313|SNOMEDCT|||  
ROS|Rosiglitazone (substance)|||C0289313|SNOMEDCT|||  
ROS|V-ROS AVIAN UR2 SARCOMA VIRUS ONCOGENE HOMOLOG  
1|C0812281;C1709820|||C0812281|OMIM|||  
ROS|V-ROS UR2 Sarcoma Virus Oncogene Homolog 1 (Avian) Gene|||C0812281|NCI|||  
ROS|active oxygen|C0162772|||C0162772|CHV|||

ROS|c-ros oncogene 1, receptor tyrosine kinase|C0812281|||C0812281|HUGO|||  
ROS|c-ros-1|C0812281|||C0812281|HUGO|||  
ROS|oscillatory resistance|||||1|0.001|  
ROS|oxygen radical|C0162772|||C0162772|CHV|||  
ROS|oxygen radicals|C0162772|||C0162772|AOD;CHV|1|0.0014|  
ROS|oxygen reactive species|C0162772|||C0162772|CHV|||  
ROS|pro oxidant|C0162772|||C0162772|CHV|||  
ROS|pro-oxidant|C0162772|||C0162772|NCI|||  
ROS|reactive oxygen|||||1|0.0039|  
ROS|reactive oxygen species|C0162772|||C0162772|CHV;CSP;MSH;MTH;NCI;NDFRT|1|0.9181|1  
ROS|reactive oxygen substances|||||1|0.0008|  
ROS|respiratory resistance|||||1|0.0012|  
ROS|review of systems|C0488564;C0488565;C0489633|1|1.000|C0489633|CHV|||1  
ROS|review system|C0489633|||C0489633|CHV|||  
ROS|review systems|C0489633|||C0489633|CHV|||  
ROS|rod outer segment|C0035798|||||1  
ROS|rod outer segments|C0035798|||||1|0.0705|  
ROS|rosiglitazone|C0289313|||C0289313|CHV;CSP;MSH;MTH;NCI;NDFRT;PDQ;RXNORM|||  
ROS|rosiglitazone [Chemical/Ingredient]||||C0289313|NDFRT|||  
ROS|rosiglitazones||||C0289313|CHV|||  
ROS|rostral sulcus|||||1  
ROS|system review|C0489633|||C0489633|CHV|||  
ROS|systems of review|C0489633|||C0489633|CHV|||  
RPR|EXTL3 wt Allele|C1705631|||C1705631|MTH;NCI|||  
RPR|EXTR1|C1367595;C1705631|||C1705631|NCI|||  
RPR|Exostoses (Multiple)-Like 3 wt Allele||||C1705631|NCI|||  
RPR|KIAA0519|C1705631|||C1705631|NCI|||  
RPR|REG|C1419333;C1705631|||C1705631|NCI|||  
RPR|RPR|C1705631|||C0201405;C1705631|LNC;MTH;NCI|||  
RPR|RPR test|C0201405|||C0201405|SNOMEDCT|||  
RPR|Rapid Plasma Reagin|C0201405|||C0201405|NCI|||  
RPR|Rapid Plasma Reagin Measurement|C0201405|||C0201405|MTH;NCI|||  
RPR|Rapid plasma reagin test|C0201405|||C0201405|SNOMEDCT|||  
RPR|Rapid plasma reagin test (procedure)||||C0201405|SNOMEDCT|||  
RPR|Reiter protein reagin|||||1  
RPR|rapid plasma reagin|C0201405|1|1.000|||1|0.9145|1  
RPR|rapid plasma reagin (rpr) test|C0201405|||C0201405|CHV|||  
RPR|rapid plasma reagin test|C0201405|||C0201405|CHV|1|0.0855|  
RPR|rotational panoramic radiography|||||1  
RR|R-R interval|C0488420;C2041217|||||1|0.0036|  
RR|Relative risk of death|||||1|0.0009|  
RR|Resonance Raman|||||1|0.0377|  
RR|Respiratory rates|C0231832|||||1|0.0023|  
RR|Riva-Rocci|||||1  
RR|Ross River|||||1|0.0047|  
RR|Roundup Ready|||||1|0.0016|  
RR|blood pressure|C0005823;C1271104;C1272641|||||1|0.0016|  
RR|cycle length|||||1|0.0018|  
RR|heart period|||||1|0.0014|  
RR|intervals|C1272706|||||1|0.0025|  
RR|patients with relapsing-remitting|||||1|0.005|  
RR|radial rate|||||1  
RR|radiation reaction|||||1  
RR|radiation response|||||1  
RR|rapid radiometric|||||1  
RR|rate ratio|||||1|0.0542|1

RR|reactive|C0205332|||||1|0.0018|  
RR|reading retarded|||||||1  
RR|recovery room|C0034871|||C0034871|CHV;MSH;SNOMEDCT|1|0.0036|1  
RR|recurrence|C0034897;C1458156;C2825055|||||1|0.0016|  
RR|red reflex|C0278244|||||||1  
RR|reference range|C0034926|||C0034926|CHV;HL7V2.5;MSH;NCI|||  
RR|region|C0017446;C0205147|||||1|0.0016|  
RR|regular rate|||||||1  
RR|regular respiration|||||||1  
RR|relapsing remitting|||||1|0.0057|  
RR|relative recovery|||||1|0.0013|  
RR|relative response|||||1|0.0038|1  
RR|relative risk|C0242492|||C0242492|AOD;CHV;MSH;NCI|1|0.7104|1  
RR|renin release|||||1|0.0031|1  
RR|resistant relapse|||||||1  
RR|respiration rate|C0231832|||C0231832|CHV;LNC;MSH|||  
RR|respiratory  
rate|C0231832;C0489258|1|1.000|C0231832;C0489258|CHV;LNC;MSH;MTH;NCI;SNOMEDCT|||  
1  
RR|respiratory reserve|||||||1  
RR|response rate|C0237629|||C0237629|CHV;NCI|1|0.0298|1  
RR|response regulator|||||1|0.0018|  
RR|retinal reflex|||||||1  
RR|reversal reaction|||||1|0.0027|  
RR|reverse redistribution|||||1|0.0038|  
RR|rheumatoid rosette|||||||1  
RR|ribonucleotide  
reductase|C0035547|||C0035547|CHV;CSP;MSH;MTH;NCI;NDFRT|1|0.025|  
RR|right rotation|||||||1  
RR|righting reflex|C0234156|||C0234156|AOD;GO;MSH;SNOMEDCT|1|0.0025|  
RR|risk ratio|C0028873;C0242492|||C0028873;C0242492|CHV;MSH;NCI|1|0.0519|1  
RR|road rash|||||||1  
RR|roentgenographic pelvimetry|||||||1  
RR|rotation right|||||||1  
RR|ruthenium red|C0035975|||C0035975|MSH;NDFRT|1|0.0323|1  
RSV|Human Respiratory Syncytial Virus|C0035236;C0206545|||C0035236|NCI|||  
RSV|RSV|||C0035236;C0086943|CHV;CSP;MEDLINEPLUS;NCI;SNOMEDCT|||  
RSV|Respiratory Syncytial Virus|C0035236|||C0035236|MSH;NCI|||  
RSV|Respiratory Syncytial Viruses|C0035236|||C0035236|MSH|||  
RSV|Respiratory syncytial viral|||||1|0.0034|  
RSV|Respiratory syncytial virus|C0035236|||C0035236|LNC;MTH;NCBI;SNOMEDCT|||  
RSV|Respiratory syncytial virus (organism)|||C0035236|SNOMEDCT|||  
RSV|Rous Sarcoma Virus|C0086943|||C0086943|NCI|||  
RSV|Rous sarcoma  
virus|C0086943|||C0086943|AOD;CSP;MSH;MTH;NCBI;SNOMEDCT|1|0.2092|1  
RSV|Rous sarcoma virus (organism)|||C0086943|SNOMEDCT|||  
RSV|Rous sarcoma virus RSV|C0086943|||C0086943|NCBI|||  
RSV|Syncytial Virus, Respiratory|C0035236|||C0035236|MSH|||  
RSV|Syncytial Viruses, Respiratory|C0035236|||C0035236|MSH|||  
RSV|Virus, Respiratory Syncytial|C0035236|||C0035236|MSH|||  
RSV|Viruses, Respiratory Syncytial|C0035236|||C0035236|MSH|||  
RSV|regurgitant stroke volume|||||1|0.003|1  
RSV|respiratory syncytial|||||1|0.0034|  
RSV|respiratory syncytial  
virus|C0035236|1|1.000|C0035236|CHV;CSP;LNC;MSH;MTH;NCBI;NCI;SNOMEDCT|1|0.7779|1  
RSV|respiratory syncytial virus (RSV)|C0035236|||C0035236|CHV|||  
RSV|respiratory syncytial virus RS|C0035236|||C0035236|NCBI|||

RSV|respiratory syncytial virus RS virus|C0035236|||C0035236|NCBI|||  
RSV|respiratory syncytial virus RSV|C0035236|||C0035236|NCBI|||  
RSV|right subclavian vein|C0489887|||1  
RSV|rous sarcoma virus|C0086943|||C0086943|CHV|||  
RSV|saphenous vein|C0036186;C0392907|||1|0.003|  
RSV|sarcoma virus, Rous|C0086943|||C0086943|MSH|||  
RSV|syncytial respiratory virus|C0035236|||C0035236|CHV|||  
RSV|virus, Rous sarcoma|C0086943|||C0086943|MSH|||  
RT|(drug) RT||1|0.002|||  
RT|Cancer Radiotherapy|C1522449|||C1522449|NCI|||  
RT|Irradiate|C1522449|||C1522449|NCI|||  
RT|Irradiated|C1517600;C1522449;C1548980|||C1522449|NCI|||  
RT|Irradiation|C1282930;C1522449|||C1522449|NCI|||  
RT|LGMD2K|C1418752;C1836373|||C1418752|HUGO|||  
RT|POMT1|C1418752|||C1418752|HUGO;OMIM|||  
RT|POMT1 gene|C1418752|||C1418752|HUGO;LNC;MTH|||  
RT|PROTEIN O-MANNOSYLTRANSFERASE 1|C1418752|||C1418752|OMIM|||  
RT|RADIATION THERAPY|C0034619;C1522449|||C1522449|DXP|||  
RT|RADIOTHER|||C0034619;C1522449|MSH|||  
RT|RNA-directed DNA polymerase activity|C1152411|||C1152411|GO;MTH|||  
RT|ROTATED ABDOMEN, DROSOPHILA, HOMOLOG OF|||C1418752|OMIM|||  
RT|RT|||C0034619;C1152411;C1418752;C1522449;C2826321;C2953923|FMA;GO;MSH;NCI;OMIM|||  
RT|RT - Radiotherapy|C1522449|||C1522449|SNOMEDCT|||  
RT|Radiation|C0034519;C0560559;C0851346;C1522449;C1524020;C1524021|||C1522449|NCI|||  
RT|Radiation Therapy|C0034619;C1522449|||C1522449|MEDLINEPLUS;NCI|||  
RT|Radiation oncology AND/OR radiotherapy|||C1522449|SNOMEDCT|||  
RT|Radiation oncology AND/OR radiotherapy (procedure)|||C1522449|SNOMEDCT|||  
RT|Radiation therapy|C0034619;C1522449|||C1522449|SNOMEDCT|||  
RT|Radiation therapy (procedure)|||C1522449|SNOMEDCT|||  
RT|Radiation therapy, NOS|C0034619;C1522449|||C1522449|SNOMEDCT|||  
RT|Radiotherapeutics|C1522449|||C1522449|NCI|||  
RT|Radiotherapies|C1522449|||C1522449|MSH|||  
RT|Radiotherapy|C0034619;C0243005;C1522449|||C1522449|CCS;LCH;MEDLINEPLUS;MSH;NCI;SNOMEDCT|||  
RT|Radiotherapy (regime/therapy)|||C1522449|SNOMEDCT|||  
RT|Radiotherapy, NOS|C0034619;C0243005;C1522449|||C1522449|SNOMEDCT|||  
RT|Refractory Thrombocytopenia|C2826321|||C2826321|MTH;NCI|||  
RT|Reporter's Test|||1  
RT|Rostrotemporal auditory area|C2953923|||C2953923|FMA;MTH|||  
RT|Therapeutic radiology|C0243004;C0243005;C1522449|||C1522449|CCS|||  
RT|Therapeutic radiology for cancer treatment|C1522449|||C1522449|CCS|||  
RT|Therapeutic radiology procedure|C1522449|||C1522449|MTH|||  
RT|Therapy, Radiation|C0034619;C1522449|||C1522449|NCI|||  
RT|irradiated|C1517600;C1522449;C1548980|||C1522449|NCI|||  
RT|irradiation|C1282930;C1522449|||C1522449|CHV;NCI;PDQ|1|0.0237|  
RT|nucleus rotundus|||1|0.0022|  
RT|protein-O-mannosyltransferase 1|C1418752|||C1418752|HUGO|||  
RT|rabbit trachea|||1  
RT|radiation|C0034519;C0560559;C0851346;C1522449;C1524020;C1524021|||1|0.0168|  
RT|radiation therapies|C1522449|||C1522449|CHV|||  
RT|radiation therapy|C0034619;C1522449|1|0.672|C0034619;C1522449|AOD;CHV;CSP;MSH;NCI;PDQ|1|0.1781|1  
RT|radiation treatment|||1|0.0016|  
RT|radiations therapy|C1522449|||C1522449|CHV|||



RT|thalamic reticular nucleus|C0228357;C1744590|||||1|0.005|  
RT|therapy radiation|C1522449|||C1522449|CHV|||  
RT|therapy, radiation|C0034619;C1522449|||C1522449|PDQ|||  
RT|total pulmonary vascular resistance|||||1|0.0016|  
RT|total vascular resistance|||||1|0.0014|  
RT|transepithelial electrical resistance|||||1|0.0036|  
RT|transepithelial resistance|||||1|0.0164|  
RT|tumor|C0027651;C1578706|||||1|0.0018|  
RV|Lung residual volume|C0035190|||C0035190|SNOMEDCT|||  
RV|RV|C0035190|||C0035190|SNOMEDCT|||  
RV|RV - Residual respiratory volume|C0035190|||C0035190|SNOMEDCT|||  
RV|Rappaport-Vassiliadis|||||1|0.0085|  
RV|Rauscher virus|C0034725|||||1|  
RV|Renal venous|||||1|0.0021|  
RV|Residual Volume|C0035190;C0429713;C0802961|||C0035190|MSH;NCI|||  
RV|Residual Volumes|C0035190|||C0035190|MSH|||  
RV|Residual respiratory volume|C0035190|||C0035190|SNOMEDCT|||  
RV|Residual respiratory volume (observable entity)|||C0035190|SNOMEDCT|||  
RV|Residual volume|C0035190;C0429713;C0802961|||C0035190|MTH;SNOMEDCT|||  
RV|Rhinovirus|C0035473|||||1|0.0259|  
RV|Russell viper|C0206318|||||1|  
RV|Venous resistance|||||1|0.0035|  
RV|Volume, Residual|C0035190;C0429713;C0802961|||C0035190|MSH|||  
RV|Volume.residual|C0035190|||C0035190|LNC|||  
RV|Volumes, Residual|C0035190|||C0035190|MSH|||  
RV|lung residual volume|C0035190|||C0035190|CHV|||  
RV|lungs residual volume|C0035190|||C0035190|CHV|||  
RV|rabies virus|C0034497|||||1|0.0329|  
RV|random variable|||||1|  
RV|rat virus|C0023104|||||1|0.0092|1|  
RV|rectal vault|||||1|  
RV|rectovaginal|C0450213;C0545864|||||1|  
RV|reference value|C0034926|||||1|  
RV|regurgitant volume|C0946338|||||1|  
RV|reinforcement value|||||1|  
RV|renal vein|C0035092;C1278961|||||1|0.0039|1|  
RV|renal venous|||||1|  
RV|reovirus|C0206596;C0999948;C1963012|||||1|  
RV|reserve volume|||||1|  
RV|residual lung volume|C0035190|||C0035190|CHV|||  
RV|residual  
volume|C0035190;C0429713;C0802961|||C0035190;C0429713;C0802961|AOD;CHV;LNC;MSH;M  
TH;NCI;SNOMEDCT|1|0.1275|1|  
RV|residual volume lung|C0035190|||C0035190|CHV|||  
RV|respiratory volume|C0024129|||||1|  
RV|retinal vasculitis|C0152026|||||1|0.0043|1|  
RV|retrovaginal|||||1|  
RV|retroversion|C0333055|||||1|  
RV|retrovesical|||||1|  
RV|retroviral vector|C1514926|||||1|0.0043|  
RV|return visit|||||1|  
RV|rhabdovirus|C0035414;C1540830|||||1|  
RV|rheumatoid vasculitis|C0240903|||||1|0.0074|1|  
RV|rhinovirus|C0035473|||||1|  
RV|right ventricle|C0225883;C1269891|1|1.000|||1|0.1863|1|  
RV|right ventricular|||||1|0.5002|1|  
RV|right ventricular free wall|||||1|0.0021|

RV|rotavirus|C0035870;C0724688|||||1|0.0375|1  
RV|rubella vaccine|C0035923|||||1  
RV|rubella virus|C0035924|||||1|0.0443|1  
RV|rv|C0035190|||C0035190|CHV|||  
RV|rvs|C0035190|||C0035190|CHV|||  
RVR|BD73|C1417822|||C1417822|HUGO;OMIM|||  
RVR|EAR-1r|C1417822|||C1417822|HUGO|||  
RVR|HZF2|C1417822;C1421754|||C1417822|HUGO|||  
RVR|Hs.37288|C1417822|||C1417822|HUGO|||  
RVR|NR1D2|C1417822|||C1417822|HUGO;OMIM|||  
RVR|NR1D2 gene|C1417822|||C1417822|HUGO;MTH|||  
RVR|NUCLEAR RECEPTOR SUBFAMILY 1, GROUP D, MEMBER 2|C1417822|||C1417822|OMIM|||  
RVR|REV-ERBA-ALPHA-RELATED RECEPTOR|||C1417822|OMIM|||  
RVR|RVR|C1417822|||C1417822|HUGO;OMIM|||  
RVR|nuclear receptor subfamily 1, group D, member 2|C1417822|||C1417822|HUGO|||  
RVR|rapid ventricular response|C0748243|1|1.000|||||1  
RVR|reduced vascular response|||||1  
RVR|reduced vestibular response|||||1  
RVR|relative vascular resistance|||||1  
RVR|renal vascular resistance|||||1|0.9306|1  
RVR|renal vein renin|||||1|0.0174|1  
RVR|renovascular resistance|||||1  
RVR|repetitive ventricular response|||||1|0.0304|1  
RVR|resistance to venous return|||||1|0.0217|1  
RVR|right ventricular rhythm|||||1  
RVSP|RVSP|C1979972|||C1979972|LNC|||  
RVSP|RVSP (Right Ventricular Systolic Pressure)|C1979972|||C1979972|MTH|||  
RVSP|right ventricular systolic pressure|C0456181|1|1.000|||1|1|1  
SAB|Anesthesia, Spinal|C0002928|||C0002928|MSH|||  
SAB|Anesthesias, Spinal|C0002928|||C0002928|MSH|||  
SAB|Intradural block|C0002928|||C0002928|SNOMEDCT|||  
SAB|Intrathecal block|C0002928|||C0002928|SNOMEDCT|||  
SAB|Local anaesthetic intrathecal block|C0002928|||C0002928|SNOMEDCT|||  
SAB|Local anaesthetic intrathecal block (procedure)|||C0002928|SNOMEDCT|||  
SAB|Local anesthetic intrathecal block|C0002928|||C0002928|SNOMEDCT|||  
SAB|Local anesthetic intrathecal block (procedure)|||C0002928|SNOMEDCT|||  
SAB|SAB|C0002928;C1420024|||C0002928;C1420024|LNC;NCI;OMIM|||  
SAB|SH3 DOMAIN-BINDING PROTEIN 5|C1420024|||C1420024|OMIM|||  
SAB|SH3 binding protein|C1420024|||C1420024|HUGO|||  
SAB|SH3-domain binding protein 5 (BTK-associated)|||C1420024|HUGO|||  
SAB|SH3BP5|C1420024|||C1420024|HUGO;OMIM|||  
SAB|SH3BP5 gene|C1420024|||C1420024|HUGO;MTH|||  
SAB|Sab|C0002928;C1420024|||C1420024|HUGO|||  
SAB|Spinal Anesthesia|C0002928|||C0002928|MSH;MTH|||  
SAB|Spinal Anesthesias|C0002928|||C0002928|MSH|||  
SAB|Spinal Block|C0002928|||C0002928|NCI|||  
SAB|Spinal anaesthesia|C0002928|||C0002928|SNOMEDCT|||  
SAB|Spinal anaesthetic|C0002928|||C0002928|SNOMEDCT|||  
SAB|Spinal anaesthetic NOS|C0002928|||C0002928|SNOMEDCT|||  
SAB|Spinal anesthesia|C0002928|||C0002928|LCH;SNOMEDCT|||  
SAB|Spinal anesthesia (procedure)|||C0002928|SNOMEDCT|||  
SAB|Spinal anesthetic|C0002928|||C0002928|SNOMEDCT|||  
SAB|Spinal anesthetic NOS|C0002928|||C0002928|SNOMEDCT|||  
SAB|Spinal anesthetic NOS (procedure)|||C0002928|SNOMEDCT|||  
SAB|Spinal block|C0002928|||C0002928|SNOMEDCT|||  
SAB|Staphylococcus aureus bacteremia|C1142423|||||1|0.2838|1  
SAB|Subarachnoid block|C0002928|||C0002928|SNOMEDCT|||

SAB|sequential androgen blockade|||||||1  
SAB|serum albumin|C0036773;C0728877|||||||1  
SAB|short-acting block|||||||1  
SAB|side air bags|||||||1  
SAB|significant asymptomatic bacteriuria|||||||1  
SAB|sinusatrial block|||||||1  
SAB|solid-adherent bacteria|||||||0.0676|  
SAB|spinal anaesthesia|C0002928|||C0002928|CHV|||  
SAB|spinal anesthesia|C0002928|||C0002928|AOD;CHV;NCI|||  
SAB|spinal anesthetic|C0002928|||C0002928|CHV|||  
SAB|spinal block|C0002928|||C0002928|CHV;CSP;NCI|||  
SAB|spontaneous  
abortion|C0000786|1|1.000|C0000786|AOD;CCS;CHV;COSTAR;CSP;ICD9CM;MEDLINEPLUS;MSH  
;MTH;NCI;NDFRT;SNOMEDCT|1|0.4189|1  
SAB|spontaneous alternation behavior|||||||1|0.1351|  
SAB|streptavidin-biotin|||||||1  
SAB|subacromial  
bursa|C0224792;C1269087|||C0224792;C1269087|CHV;FMA;SNOMEDCT;UWDA|||  
SAB|subarachnoid bleed|||||||1  
SAB|subarachnoid block|C0002928|||C0002928|CHV;NCI;SNOMEDCT|1|0.0946|1  
SA|37LRP|||C1539696|HUGO|||  
SA|67LR|||C1539696|OMIM|||  
SA|ACSM3|C1825840|||C1825840|HUGO;OMIM|||  
SA|ACSM3 gene|C1825840|||C1825840|HUGO;MTH|||  
SA|ACYL-CoA SYNTHETASE MEDIUM-CHAIN FAMILY MEMBER 3|C1825840|||C1825840|OMIM|||  
SA|LAMBR|C1539696;C1705231|||C1539696|OMIM|||  
SA|LAMININ RECEPTOR 1|C1367780;C1539696|||C1539696|OMIM|||  
SA|LAMININ RECEPTOR, 67-KD|C1367780;C1539696|||C1539696|OMIM|||  
SA|LAMR1|C1367780;C1539696;C1705231|||C1539696|OMIM|||  
SA|LRP|C2987171|||C1539696|HUGO|||  
SA|NATO code for arsine|||||||1  
SA|RIBOSOMAL PROTEIN SA|C1367780;C1539696|||C1539696|OMIM|||  
SA|RPSA|C1539696|||C1539696|HUGO;NCI;OMIM|||  
SA|RPSA Gene|C1539696|||C1539696|NCI|||  
SA|RPSA gene|C1539696|||C1539696|HUGO;MTH|||  
SA|Ribosomal Protein SA Gene|C1539696|||C1539696|NCI|||  
SA|SA|C0036243;C1539696;C1825840|||C0036243;C1539696;C1825840|HUGO;NCI;OMIM|||  
SA|SA, RAT, HOMOLOG OF|||C1825840|OMIM|||  
SA|SAH|C1825840|||C1825840|OMIM|||  
SA|SAU|C0036243|||C0036243|NCI|||  
SA|SAUDI ARABIA|C0036243|||C0036243|NCI|||  
SA|Saudi Arabia|C0036243|||C0036243|AOD;CSP;LCH;MSH;MTH;NCI;SNOMEDCT|||  
SA|Saudi Arabia (geographic location)|||C0036243|SNOMEDCT|||  
SA|Schizophrenics Anonymous|||||||1  
SA|Sexaholics Anonymous|||||||1  
SA|Situation Awareness|||||||1|0.0024|  
SA|Skeletal age|||||||1|0.0049|  
SA|Sleep apnoea|C0037315|||||||1|0.0059|  
SA|Sodium salicylate|C0037549|||||||1|0.0103|  
SA|South Africa|C0037712|||||||1|0.0064|  
SA|South African|C0238605|||||||1|0.0078|  
SA|South Australia|C0037715|||||||1|0.0093|  
SA|Spinal anesthesia|C0002928|||||||1|0.0093|  
SA|Spontaneous abortion|C0000786|||||||1|0.0122|  
SA|Staphylococcus aureus|C0038172;C1318973|||||||1|0.0548|1  
SA|Staphylococcus aureus Cowan I|||||||1|0.0054|  
SA|Status asthmaticus|C0038218|||||||1|0.0064|





SBE|ENDOCARDITIDES SUBACUTE BACT||||C0014122|MSH|||  
SBE|ENDOCARDITIS SUBACUTE BACT||||C0014122|MSH|||  
SBE|ENDOCARDITIS, BACTERIAL, SUBACUTE|C0014122|||C0014122|DXP|||  
SBE|Endocarditides, Subacute Bacterial|C0014122|||C0014122|MSH;NDFRT|||  
SBE|Endocarditis Lenta|C0014122|||C0014122|MSH;NDFRT|||  
SBE|Endocarditis lenta|C0014122|||C0014122|SNOMEDCT|||  
SBE|Endocarditis, Subacute Bacterial|C0014122|||C0014122|MSH;NDFRT|||  
SBE|Endocarditis, Subacute Bacterial [Disease/Finding]||||C0014122|NDFRT|||  
SBE|Endocarditis, lenta|C0014122|||C0014122|MTHICD9|||  
SBE|SBE|C0014122|||C0014122|DXP;MTHICD9;SNOMEDCT|||  
SBE|SBE - Subacute bacterial endocarditis|C0014122|||C0014122|SNOMEDCT|||  
SBE|SMAD-binding element|||||1|0.1905|  
SBE|SUBACUTE BACT ENDOCARDITIDES||||C0014122|MSH|||  
SBE|SUBACUTE BACT ENDOCARDITIS||||C0014122|MSH|||  
SBE|Subacute Bacterial Endocarditides|C0014122|||C0014122|MSH;NDFRT|||  
SBE|Subacute Bacterial Endocarditis|C0014122|||C0014122|MSH;MTH;NCI;NDFRT|||  
SBE|Subacute bacterial endocarditis|C0014122|||C0014122|MTHICD9;SNOMEDCT|||  
SBE|Subacute bacterial endocarditis (disorder)||||C0014122|SNOMEDCT|||  
SBE|Subacute endocarditis, bacterial|C0014122|||C0014122|MTHICD9|||  
SBE|Subacute endocarditis, lenta|C0014122|||C0014122|MTHICD9|||  
SBE|bacterial endocarditis subacute||||C0014122|CHV|||  
SBE|endocarditis infectious||||C0014122|CHV|||  
SBE|endocarditis lenta|C0014122|||C0014122|CHV|||  
SBE|ie|C0014122;C0022067;C1881173|||C0014122|CHV|||  
SBE|infectious endocarditis|C0014122|||C0014122|CHV|||  
SBE|saturated base excess|||||1|  
SBE|sbe|C0014122|||C0014122|CHV|||  
SBE|self-breast examination|C0085105|||||1|  
SBE|short below-elbow|||||1|  
SBE|short-segment Barrett esophagus|||||1|  
SBE|shortness of breath on exertion||||C0231807|CHV|||1|  
SBE|single base extension|||||1|0.2857|  
SBE|small-bowel enteroscopy|||||1|  
SBE|sporadic bovine encephalitis|C0276112|||C0276112|SNOMEDCT|||  
SBE|sporadic bovine encephalomyelitis|C0276112|||C0276112|SNOMEDCT|||  
SBE|starch branching enzyme|C0000052;C1152072|||||1|0.119|  
SBE|subacute bacterial  
endocarditis|C0014122|1|1.000|C0014122|CHV;MSH;MTH;MTHICD9;NCI;NDFRT;SNOMEDCT|1|  
0.4048|1|  
SBP|ABP|C1412100|||C1705296|NCI|||  
SBP|SBP|C1306620;C1705296|||C1705296|NCI|||  
SBP|SHBG||||C1705296|NCI|||  
SBP|SHBG wt Allele|C1705296|||C1705296|MTH;NCI|||  
SBP|Sex Hormone-Binding Globulin wt Allele|C1705296|||C1705296|NCI|||  
SBP|Systolic blood pressure measurement|C1306620|||C1306620|MTH|||  
SBP|blood pressure systolic||||C1306620|CHV|||  
SBP|sbp|C1306620;C1705296|||C1306620|CHV|||  
SBP|school breakfast program|||||1|  
SBP|scleral buckling procedure|C0036411|||||1|  
SBP|selenium-binding protein|C1527491|||||1|  
SBP|serotonin binding proteins|||||1|0.0014|  
SBP|serotonin-binding protein|C0074385|||||1|  
SBP|sex steroid-binding protein|C0036883|||||1|0.0237|  
SBP|small-bowel phytobezoar|||||1|  
SBP|solitary bone plasmacytoma|||||1|  
SBP|soybean peroxidase|||||1|0.0028|

SBP|spontaneous bacterial  
peritonitis|C0275551|1|0.834|C0275551|ICD9CM;SNOMEDCT|1|0.0515|1  
SBP|spontaneous biliary perforation|||||||1  
SBP|steroid-binding plasma protein|||||||1  
SBP|sulfobromophthalein|C0038753|||C0038753|CHV;CSP;MSH;MTH;NCI;NDFRT;RXNORM;SNO  
MEDCT|||1  
SBP|systemic blood pressure|C1272641|||C1272641|CHV;SNOMEDCT|||1  
SBP|systolic|C0039155|||||1|0.1471|  
SBP|systolic BP|C0871470|||||1|0.1083|  
SBP|systolic blood  
pressure|C0488055;C0871470;C1306620|1|0.166|C0488055;C0871470;C1306620|CHV;LNC;N  
CI;SNOMEDCT|1|0.6653|1  
SIADH|ADH INAPPROPRIATE|||C0021141|CST|||  
SIADH|ADH INAPPROPRIATE SECRETION|C0021141|||C0021141|CST|||  
SIADH|ADH Syndrome, Inappropriate|C0021141|||C0021141|MSH|||  
SIADH|ANTIDIURETIC HORMONE INAPPROPRIATE SECRET|||C0021141|MSH|||  
SIADH|ANTIDIURETIC HORMONE INAPPROPRIATE SECRETION SYNDROME  
<SIADH>|C0021141|||C0021141|QMR|||  
SIADH|ANTIDIURETIC HORMONE INAPPROPRIATE SECRETION SYNDROME  
SIADH|C0021141|||C0021141|RAM|||  
SIADH|Antidiuretic Hormone, Inappropriate  
Secretion|C0021141|||C0021141|MSH;NDFRT|||  
SIADH|INAPPROPRIATE ADH|C0021141|||C0021141|CST|||  
SIADH|INAPPROPRIATE SECRETION OF ANTIDIURETIC HORMONE|C0021141|||C0021141|DXP|||  
SIADH|INAPPROPRIATE VASOPRESSIN SECRET SYNDROME|||C0021141|MSH|||  
SIADH|Inappropriate ADH|C0021141|||C0021141|COSTAR|||  
SIADH|Inappropriate ADH Syndrome|C0021141|||C0021141|MSH;NDFRT|||  
SIADH|Inappropriate ADH Syndrome [Disease/Finding]|||C0021141|NDFRT|||  
SIADH|Inappropriate Antidiuretic Hormone Secretion  
Syndrome|C0021141|||C0021141|NCI|||  
SIADH|Inappropriate Vasopressin Secretion  
Syndrome|C0021141|||C0021141|MSH;NDFRT|||  
SIADH|SCHWARTZ-BARTTER SYNDROME|C0021141|||C0021141|DXP|||  
SIADH|SIAD - Syndrome of inappropriate  
antidiuresis|C0021141|||C0021141|SNOMEDCT|||  
SIADH|SIADH|C0021141|||C0021141|CST;DXP;MSH;NCI;NDFRT;SNOMEDCT|||  
SIADH|SIADH - Syndrome of inappropriate secretion of antidiuretic  
hormone|C0021141|||C0021141|SNOMEDCT|||  
SIADH|SYNDROME INAPPROPRIATE ADH|C0021141|||C0021141|CST|||  
SIADH|SYNDROME INAPPROPRIATE ADH SIADH SECRET|||C0021141|MSH|||  
SIADH|SYNDROME OF INAPPROPRIATE ANTIDIURETIC  
HORMONE|C0021141|||C0021141|COSTAR|||  
SIADH|Schwartz Bartter Syndrome|C0021141|||C0021141|MSH|||  
SIADH|Schwartz-Bartter Syndrome|C0021141|||C0021141|MSH;NDFRT|||  
SIADH|Schwartz-Bartter syndrome|C0021141|||C0021141|SNOMEDCT|||  
SIADH|Schwarz-Bartter syndrome|||C0021141|SNOMEDCT|||  
SIADH|Syndrome of Inappropriate ADH (SIADH) Secretion|||C0021141|MSH;NDFRT|||  
SIADH|Syndrome of Inappropriate Antidiuretic Hormone  
Secretion|C0021141|||C0021141|NCI|||  
SIADH|Syndrome of inappropriate ADH production|C0021141|||C0021141|SNOMEDCT|||  
SIADH|Syndrome of inappropriate antidiuresis|C0021141|||C0021141|SNOMEDCT|||  
SIADH|Syndrome of inappropriate antidiuretic hormone  
(SIADH)|C0021141|||C0021141|OMIM|||  
SIADH|Syndrome of inappropriate secretion of ADH|C0021141|||C0021141|MTHICD9|||  
SIADH|Syndrome of inappropriate secretion of antidiuretic  
hormone|C0021141|||C0021141|MTHICD9;SNOMEDCT|||

SIADH|Syndrome of inappropriate secretion of antidiuretic hormone (disorder)|||C0021141|SNOMEDCT|||  
SIADH|Syndrome of inappropriate vasopressin secretion|C0021141|||C0021141|SNOMEDCT|||  
SIADH|Syndrome of inappropriate vasopressin secretion (disorder)|||C0021141|SNOMEDCT|||  
SIADH|Syndrome, Inappropriate ADH|C0021141|||C0021141|MSH|||  
SIADH|Syndrome, Schwartz-Bartter|C0021141|||C0021141|MSH|||  
SIADH|adh inappropriate secretion|C0021141|||C0021141|CHV|||  
SIADH|adh inappropriate syndrome|C0021141|||C0021141|CHV|||  
SIADH|adh inappropriate syndromes|C0021141|||C0021141|CHV|||  
SIADH|inappropriate ADH secretion|C0021141|||C0021141|AOD|||  
SIADH|inappropriate adh|C0021141|||C0021141|CHV|||  
SIADH|inappropriate adh secretion|C0021141|||C0021141|CHV|||  
SIADH|siadh|C0021141|||C0021141|CHV|||  
SIADH|siadhs|C0021141|||C0021141|CHV|||  
SIADH|syndrome of inappropriate antidiuretic hormone|C0021141|||C0021141|COSTAR|||1  
SIADH|syndrome of inappropriate antidiuretic hormone secretion|C0021141|||1|0.3528|  
SIADH|syndrome of inappropriate diuretic hormone secretion||1|1.000|||1|  
SIADH|syndrome of inappropriate secretion of ADH|C0021141|||1|0.0528|  
SIADH|syndrome of inappropriate secretion of antidiuretic hormone|C0021141|||1|0.5944|  
SI|(drug) SI||1|0.002|||1|  
SI|95 kDa Melanocyte-Specific Secreted Glycoprotein|C0257766|||C0257766|NCI|||  
SI|D12S53E|C1420066;C1705301|||C1420066;C1705301|HUGO;NCI|||  
SI|GP100|||C1420066|OMIM|||  
SI|International System of Units|C0021791|||C0021791|MSH;MTH;NCI|||1  
SI|ME20|C0257766;C1420066;C1705301|||C0257766;C1420066;C1705301|NCI;OMIM|||  
SI|ME20 antigen, human|C0257766|||C0257766|MSH|||  
SI|ME20 protein, human|C0257766|||C0257766|MSH|||  
SI|ME20-M|C0257766|||C0257766|NCI|||  
SI|ME20-M/ME20-S|C0257766|||C0257766|NCI|||  
SI|ME20M|C0257766|||C0257766|NCI|||  
SI|ME20M/ME20S|||C0257766|NCI|||  
SI|MELANOCYTE PROTEIN 17|C1420066|||C1420066|OMIM|||  
SI|Melanocyte Lineage-Specific Antigen gp100|C0257766;C1608320|||C0257766|NCI|||  
SI|Melanocyte Protein MEL17|C0257766|||C0257766|NCI|||  
SI|Melanocyte Protein PMEL17|C0257766|||C0257766|NCI|||  
SI|Melanocyte Protein Pmel 17|C0257766;C1608320|||C0257766|NCI|||  
SI|Melanocyte protein mel 17, human|C0257766|||C0257766|MSH|||  
SI|Melanoma-Associated ME20 Antigen|||C0257766|NCI|||  
SI|Modern Metric System|C0021791|||C0021791|NCI|||  
SI|Oligosaccharide alpha-1,6-glucosidase|||C1420044|HUGO|||  
SI|PMEL|C1420066|||C1420066|HUGO;OMIM|||  
SI|PMEL gene|C1420066|||C1420066|HUGO;MTH|||  
SI|PMEL17|C0257766;C1420066;C1705301|||C0257766;C1420066;C1705301|NCI;OMIM|||  
SI|PMEL17 protein, human|C0257766|||C0257766|MSH|||  
SI|PREMELANOSOMAL PROTEIN|C1420066|||C1420066|OMIM|||  
SI|Pmel 17 protein, human|C0257766|||C0257766|MSH|||  
SI|Pmel17|C0257766;C1420066;C1705301|||C1420066|HUGO|||  
SI|SI|||C0021791;C0037107;C0037334;C0257766;C1420044;C1420066;C1705301|HUGO;LNC;NCI;OMIM|||  
SI|SI Unit|C0021791;C1705302|||C0021791|MSH|||  
SI|SI Units|C0021791|||C0021791|MSH|||  
SI|SI gene|C1420044|||C1420044|HUGO;MTH|||

SI|SIL||||C0257766;C1705301|NCI|||  
SI|SILICON|C0037107|||C0037107|MTHSPL;NCI|||  
SI|SILV|C0257766;C1420066|||C0257766;C1420066|NCI;OMIM|||  
SI|SILV Gene|C1420066|||C1420066|NCI|||  
SI|SILV protein, human|C0257766|||C0257766|MSH;MTH|||  
SI|SILV wt Allele|C1705301|||C1705301|MTH;NCI|||  
SI|SILVER, MOUSE, HOMOLOG OF|||C1420066|OMIM|||  
SI|SLOVENIA|C0037334|||C0037334|NCI|||  
SI|SUCRASE-ISOMALTASE|C0028941;C1420044|||C1420044|OMIM|||  
SI|SVN|C0037334|||C0037334|NCI|||  
SI|Salience Inventory|||||||1  
SI|Serum iron|C1318312|||||1|0.0187|  
SI|Si||||C0037107|LNC;NCI|||  
SI|Si - Silicon|C0037107|||C0037107|SNOMEDCT|||  
SI|Si element|C0037107|||C0037107|CSP|||  
SI|Silicon|C0037107|||C0037107|LCH;LNC;MSH;MTH;NCI;NDFRT;RXNORM;SNOMEDCT|||  
SI|Silicon (substance)|||C0037107|SNOMEDCT|||  
SI|Silicon [Chemical/Ingredient]||||C0037107|NDFRT|||  
SI|Silicon, NOS|C0037107|||C0037107|SNOMEDCT|||  
SI|Silver Homolog|C0257766|||C0257766|NCI|||  
SI|Silver Homolog (Mouse) Gene|||C1420066|NCI|||  
SI|Silver Homolog (Mouse) wt Allele|||C1705301|NCI|||  
SI|Silver Like|||C0257766|NCI|||  
SI|Silver Locus Protein Homolog|C0257766;C1608320|||C0257766|NCI|||  
SI|Simulated ischemia|||||1|0.0089|  
SI|Singh Index|||||||1  
SI|Slovenia|C0037334|||C0037334|AOD;CSP;MSH;MTH;NCI;SNOMEDCT|||  
SI|Slovenia (geographic location)|||C0037334|SNOMEDCT|||  
SI|Sputum induction|||||1|0.0047|  
SI|Structured Interview|C0681913|||||1|0.0221|  
SI|Systematic Inquiry|||||||1  
SI|Systeme International d'Unites|C0021791|||C0021791|MSH|||  
SI|Unit, SI|C0021791;C1705302|||C0021791|MSH|||  
SI|Units, SI|C0021791|||C0021791|MSH|||  
SI|first|C0205435;C1279901|||||1|0.006|  
SI|first somatic sensory area|||||1|0.0047|  
SI|first somatosensory area|||||1|0.0034|  
SI|gp100|||C0257766;C1420066;C1705301|HUGO;NCI|||  
SI|infection|C0021311|||||1|0.0043|  
SI|injury|C0175677|||||1|0.0038|  
SI|insulin sensitivity|C0920563|||C0920563|CHV;CSP;MSH|1|0.0826|  
SI|international system of units|C0021791|||C0021791|CHV|||  
SI|interval|C1272706;C1552654;C1552713|||||1|0.0038|  
SI|most anterior point on lower contour of sella turcica|||||||1  
SI|premelanosome protein|C1420066|||C1420066|HUGO|||  
SI|primary|C0205225;C0439631|||||1|0.02|  
SI|primary somatosensory|||||1|0.0379|  
SI|primary somatosensory area|||||1|0.0038|  
SI|primary somatosensory cortex|||||1|0.1069|  
SI|sacroiliac|C0555898|1|0.980|C0555898|CHV;HL7V2.5;LNC;SNOMEDCT|1|0.0387|1  
SI|sacroiliitis|C0574960|||C0574960|AIR;AOD;CHV;COSTAR;MSH;NDFRT;OMIM;SNOMEDCT|1|0.006|  
SI|sagittal index|||||||1  
SI|saline infusion|||||||1  
SI|saline injection|||||||1  
SI|saturation index|||||||1  
SI|sector iridotomy|||||||1

SI|self-incompatibility|C1654759|||||1|0.0353|  
SI|self-incompatible|||||1|0.0055|  
SI|self-inflicted|||||1|  
SI|sensitive index|||||1|  
SI|sensory  
integration|C0679019;C0695560|||C0679019;C0695560|AOD;CHV;MTH|1|0.0034|1  
SI|sequential injection|||||1|0.0038|  
SI|serious illness|||||1|  
SI|serum insulin|C0428357;C1261415|||||1|  
SI|serum iron|C1318312|||C1318312|CHV|||1  
SI|service index|||||1|  
SI|severity index|||||1|  
SI|sex inventory|||||1|  
SI|sexual intercourse|C0009253|||||1|  
SI|short interfering|||||1|0.0043|  
SI|si unit|C0021791;C1705302|||C0021791|CHV|||  
SI|si units|C0021791|||C0021791|CHV|||  
SI|signal intensity|C0871362|||C0871362|CHV|1|0.1294|1  
SI|silent ischemia|||||1|0.0038|  
SI|silent myocardial ischemia|C0340291|||C0340291|SNOMEDCT|1|0.0043|  
SI|silica|C0037098|||C0037098|CHV;LCH;LNC;MSH;NCI;NDFRT;SNOMEDCT|1|0.0077|  
SI|silicon|C0037107|||C0037107|AOD;CHV;CSP|1|0.0392|1  
SI|silicone|C0037114|||C0037114|CHV;LNC;MSH;NCI;NDFRT;SNOMEDCT;VANDF|||  
SI|silver homolog (mouse) protein, human|||C0257766|MSH|||  
SI|single injection|||||1|  
SI|sinus|C0016169;C0030471;C1305231|||||1|  
SI|sinus irregularity|||||1|  
SI|situs  
inversus|C0037221|||C0037221|CHV;COSTAR;ICD9CM;MSH;MTH;NCI;NDFRT;OMIM;SNOMEDCT|1  
|0.0047|  
SI|slovenia|C0037334|||C0037334|CHV|||  
SI|small interfering|||||1|0.0051|  
SI|small intestinal|C0021852|||C0021852|SNOMEDCT|1|0.0081|  
SI|small  
intestine|C0021852;C1268998|||C0021852;C0341268;C1268998|AOD;CHV;CSP;CST;FMA;MSH  
;NCI;SNOMEDCT;UWDA|1|0.0226|1  
SI|small-intestine channel|||||1|  
SI|smoke inhalation|C0037367|||C0037367|CHV;COSTAR;CSP;SNOMEDCT|||  
SI|social interaction|C0037420|||C0037420|AOD;CHV;MSH;MTH;SNOMEDCT|1|0.0149|  
SI|social introversion|||||1|  
SI|social isolation|C0037421|||||1|0.003|  
SI|soluble insulin|C0021641|||||1|  
SI|somatosensory area I|||||1|0.0021|  
SI|special intervention|||||1|0.0132|1  
SI|specific insulin|||||1|0.0026|  
SI|spectroscopic imaging|||||1|0.017|  
SI|spinal cord isolation|||||1|0.0047|  
SI|splenic irradiation|||||1|0.0064|  
SI|stimulation index|||||1|0.0957|1  
SI|stimulation indices|||||1|0.0166|  
SI|stoichiometry of inhibition|||||1|0.0034|  
SI|stress  
incontinence|C0042025;C2712321|||C0042025;C2712321|CHV;COSTAR;MEDLINEPLUS;SNOMED  
CT|1|0.006|1  
SI|strict isolation|||||1|  
SI|stroke index|C0456712|||C0456712|SNOMEDCT|||1  
SI|structure of intellect|||||1|

SI|structured interview|C0681913|||C0681913|AOD|||  
SI|substantia innominata|C0038589|||C0038589|AOD;CSP;FMA;MSH;MTH|1|0.0247|  
SI|sucrase-  
isomaltase|C0028941;C1420044|||C0028941;C1420044|CHV;OMIM;SNOMEDCT|1|0.049|1  
SI|sucrase-isomaltase (alpha-glucosidase)|||C1420044|HUGO|||  
SI|suicidal ideation|C0424000|1|0.016|||1|0.0047|1  
SI|sulfated insulin|||1  
SI|superior-inferior|||1  
SI|suppression index|||1  
SI|syncytia-inducing|||1|0.0055|  
SI|syncytium-inducing|||1|0.0771|1  
SI|syncytium-inhibiting|||1  
SI|systolic index|||1  
SI|units si|C0021791|||C0021791|CHV|||  
SLE|DISSEMINATED LUPUS ERYTHEMATOSUS|C0024141|||C0024141|CST|||  
SLE|Disseminated lupus erythematosus|C0024141|||C0024141|MTHICD9;SNOMEDCT|||  
SLE|ENCEPH SAINT LOUIS|||C0014060|MSH|||  
SLE|ENCEPH ST LOUIS|||C0014060|MSH|||  
SLE|ENCEPH VIRAL ST LOUIS|||C0014060|MSH|||  
SLE|ENCEPHALITIS C|C0014060|||C0014060|DXP|||  
SLE|ENCEPHALITIS, SAINT LOUIS|C0014060|||C0014060|DXP|||  
SLE|Encephalitis, Saint Louis|C0014060|||C0014060|MSH;NDFRT|||  
SLE|Encephalitis, St. Louis|||C0014060|MSH;MTH;NDFRT|||  
SLE|Encephalitis, St. Louis [Disease/Finding]|||C0014060|NDFRT|||  
SLE|Encephalitis, Viral, St. Louis|||C0014060|MSH;NDFRT|||  
SLE|LE SYNDROME|C0024141|||C0024141|CST|||  
SLE|LETHARGIC ENCEPH TYPE C|||C0014060|MSH|||  
SLE|LUPUS ERYTHEMATOSIS (NOS)|C0024141|||C0024141|CST|||  
SLE|LUPUS ERYTHEMATOSIS DISSEMINATED|||C0024141|CST|||  
SLE|LUPUS ERYTHEMATOSUS SYSTEMIC|||C0024141|CST;QMR|||  
SLE|LUPUS ERYTHEMATOSUS, DISSEMINATED|C0024141|||C0024141|DXP|||  
SLE|LUPUS ERYTHEMATOSUS, SYSTEMIC|C0024141;C2984317|||C0024141|DXP|||  
SLE|LUPUS SYNDROME|C0024141|||C0024141|CST|||  
SLE|LUPUS, ERYTHEMATOSUS, SYSTEMIC|C0024141|||C0024141|MTH|||  
SLE|Lethargic Encephalitis, Type C|C0014060|||C0014060|MSH;NDFRT|||  
SLE|Louis encephalitis|||1|0.0165|  
SLE|Louis encephalitis virus|||1|0.0017|  
SLE|Lupus|C0024131;C0024138;C0024141;C0409974|||C0024141|MEDLINEPLUS|||  
SLE|Lupus Erythematosus Disseminatus|C0024141|||C0024141|MSH;NDFRT|||  
SLE|Lupus Erythematosus, Systemic|C0024141;C2984317|||C0024141|MSH;MTH;NDFRT|||  
SLE|Lupus Erythematosus, Systemic [Disease/Finding]|||C0024141|NDFRT|||  
SLE|Lupus erythematosus, Systemic|C0024141;C2984317|||C0024141|LCH|||  
SLE|Neuroinvasive Saint Louis encephalitis virus  
infection|C0014060|||C0014060|SNOMEDCT|||  
SLE|Neuroinvasive Saint Louis encephalitis virus infection  
(disorder)|||C0014060|SNOMEDCT|||  
SLE|Neuroinvasive St. Louis encephalitis virus infection|||C0014060|SNOMEDCT|||  
SLE|Neuroinvasive St. Louis encephalitis virus infection  
(disorder)|||C0014060|SNOMEDCT|||  
SLE|Republic of Sierra Leone|C0037063|||C0037063|MSH|||  
SLE|SAINT LOUIS ENCEPH|||C0014060|MSH|||  
SLE|SIERRA LEONE|C0037063|||C0037063|DXP;NCI|||  
SLE|SL|||C0037063|NCI|||  
SLE|SLE|C0024141|||C0014060;C0024141;C0037063|AOD;CHV;CSP;DXP;MEDLINEPLUS;MSH;NC  
I;OMIM;SNOMEDCT|||  
SLE|SLE - Lupus Erythematosus, Systemic|C0024141|||C0024141|NCI|||  
SLE|SLE - Saint Louis encephalitis|C0014060|||C0014060|SNOMEDCT|||

SLE|SLE - Systemic lupus erythematosus|C0024141|||C0024141|SNOMEDCT|||  
SLE|ST LOUIS ENCEPH|||C0014060|MSH|||  
SLE|ST LOUIS VIRAL ENCEPH|||C0014060|MSH|||  
SLE|SYNDROME DISSEMINATED LUPUS ERYTHEMATOSIS|||C0024141|CST|||  
SLE|SYNDROME LUPUS|C0024141|||C0024141|CST|||  
SLE|SYSTEMIC LUPUS ERYTHEMATOSIS|C0024141|||C0024141|COSTAR;MTH|||  
SLE|SYSTEMIC LUPUS ERYTHEMATOSUS|C0024141;C2984317|||C0024141|COSTAR;DXP;OMIM|||  
SLE|Saint Louis Encephalitis|C0014060|||C0014060|MSH;NDFRT|||  
SLE|Saint Louis encephalitis|C0014060|||C0014060|SNOMEDCT|||  
SLE|Sierra Leone|C0037063|||C0037063|AOD;LCH;MSH;MTH;NCI;SNOMEDCT|||  
SLE|Sierra Leone (geographic location)|||C0037063|SNOMEDCT|||  
SLE|Slit lamp examination|C0419360|||1|0.0017|  
SLE|St Louis encephalitis|C0014060|||C0014060|ICD9CM|||  
SLE|St-Louis viral disease|C0014060|||C0014060|SNOMEDCT|||  
SLE|St. Louis Encephalitis|||C0014060|MSH;NDFRT|||  
SLE|St. Louis Viral Encephalitis|||C0014060|MSH;NDFRT|||  
SLE|St. Louis encephalitis|||C0014060|CSP;ICD9CM;LCH;SNOMEDCT|||1  
SLE|St. Louis encephalitis (disorder)|||C0014060|SNOMEDCT|||  
SLE|St. Louis encephalitis virus infection|||C0014060|SNOMEDCT|||  
SLE|St. Louis encephalitis virus infection (disorder)|||C0014060|SNOMEDCT|||  
SLE|St. Louis encephalitis virus neuroinvasive disease|||C0014060|SNOMEDCT|||  
SLE|St. Louis viral disease|||C0014060|SNOMEDCT|||  
SLE|Syst lupus erythematosus|||C0024141|ICD9CM|||  
SLE|Systemic Lupus  
Erythematosus|C0024141;C2984317|||C0024141|AIR;MEDLINEPLUS;MSH;NCI;NDFRT|||  
SLE|Systemic lupus  
erythematosus|C0024141;C2984317|||C0024141|AIR;ICD9CM;MEDLINEPLUS;OMIM;SNOMEDCT|||  
SLE|Systemic lupus erythematosus (disorder)|||C0024141|SNOMEDCT|||  
SLE|Systemic lupus erythematosus NOS|C0024141;C2984317|||C0024141|SNOMEDCT|||  
SLE|Systemic lupus erythematosus NOS (disorder)|||C0024141|SNOMEDCT|||  
SLE|TYPE C LETHARGIC ENCEPH|||C0014060|MSH|||  
SLE|Type C Lethargic Encephalitis|C0014060|||C0014060|MSH;NDFRT|||  
SLE|Type C lethargic encephalitis|C0014060|||C0014060|SNOMEDCT|||  
SLE|disseminated lupus erythematosus|C0024141|||C0024141|CHV;CSP|||  
SLE|erythematosus lupus systemic|||C0024141|CHV|||  
SLE|erythematosu lupus systemic|||C0024141|CHV|||  
SLE|le syndrome|C0024141|||C0024141|CHV|||  
SLE|leone sierra|C0037063|||C0037063|CHV|||  
SLE|les syndrome|||C0024141|CHV|||  
SLE|lupus|C0024131;C0024138;C0024141;C0409974|||C0024141|CHV;CSP|||  
SLE|lupus erythematosus|C0024141|||C0024141|CHV|||  
SLE|lupus erythematosus disseminatus|C0024141|||C0024141|CHV|||  
SLE|lupus syndrome|C0024141|||C0024141|CHV|||  
SLE|lupus syndromes|C0024141|||C0024141|CHV|||  
SLE|saint louis encephalitis|C0014060|||C0014060|CHV|||  
SLE|sierra leone|C0037063|||C0037063|CHV|||  
SLE|sles|C0024141|||C0024141|CHV|||  
SLE|slit-lamp examination|C0419360|||1|  
SLE|st louis encephalitis|C0014060|||C0014060|CHV|||  
SLE|st. louis encephalitis|C0014060|||C0014060|CHV|||  
SLE|stressful life events|||1|0.0008|  
SLE|syndrome lupus|C0024141|||C0024141|CHV|||  
SLE|systemic LE|||1|0.0023|  
SLE|systemic lupus|||1|0.0014|  
SLE|systemic lupus erythematoses|||1|0.0029|  
SLE|systemic lupus erythematosus|C0024141|||1|0.0071|

SLE|systemic lupus erythematosus|C0024141;C2984317|1|1.000|C0024141;C2984317|AIR;AOD;CHV;COSTAR;CSP;DXP;ICD9CM;MEDLINEPLUS;MSH;NCI;NDFRT;OMIM;SNOMEDCT|1|0.9618|1  
SLE|systemic lupus erythematosus (SLE)|C0024141;C2984317|||C0024141|CHV|||  
SLE|systemic lupus erythematosus|||1|0.0029|  
SLE|systemic lupus erythematosus|||1|0.0009|  
SL|ADMIN SUBLINGUAL|||C0001565|MSH|||  
SL|Administration, Sublingual|C0001565|||C0001565|MSH|||  
SL|Administration, Sublingual Drug|C0001565|||C0001565|MSH|||  
SL|Administrations, Sublingual|C0001565|||C0001565|MSH|||  
SL|Administrations, Sublingual Drug|C0001565|||C0001565|MSH|||  
SL|Borrelia burgdorferi sensu lato|||1|0.0263|  
SL|DRUG ADMIN SUBLINGUAL|||C0001565|MSH|||  
SL|Drug Administration, Sublingual|C0001565|||C0001565|MSH|||  
SL|Drug Administrations, Sublingual|C0001565|||C0001565|MSH|||  
SL|Republic of Sierra Leone|C0037063|||C0037063|MSH|||  
SL|SIERRA LEONE|C0037063|||C0037063|DXP;NCI|||  
SL|SL|||C0001565;C0037063;C1704626|NCI|||  
SL|SLE|C0024141|||C0037063|NCI|||  
SL|SUBLINGUAL|C0001565;C0558302|||C0001565|NCI|||  
SL|SUBLINGUAL ADMIN|||C0001565|MSH|||  
SL|SUBLINGUAL DRUG ADMIN|||C0001565|MSH|||  
SL|Schwalbe line|C0929602|||1|  
SL|Sentinel lymphadenectomy|||1|0.0073|  
SL|Short latency|||1|0.0117|  
SL|Sibley-Lehninger|||1|  
SL|Sierra Leone|C0037063|||C0037063|AOD;LCH;MSH;MTH;NCI;SNOMEDCT|||  
SL|Sierra Leone (geographic location)|||C0037063|SNOMEDCT|||  
SL|Sleep Polysomnography Data|C1704626|||C1704626|NCI|||  
SL|Sleep Polysomnography Domain|C1704626|||C1704626|MTH;NCI|||  
SL|Smyth line|||1|0.0234|  
SL|Spin lock|||1|0.0088|  
SL|Steel|C0038239|||1|  
SL|Sublingual|C0001565;C0558302|||C0001565|HL7V2.5;NCI;SNOMEDCT|||  
SL|Sublingual Administration|C0001565|||C0001565|MSH|||  
SL|Sublingual Administrations|C0001565|||C0001565|MSH|||  
SL|Sublingual Drug Administration|C0001565|||C0001565|MSH|||  
SL|Sublingual Drug Administrations|C0001565|||C0001565|MSH|||  
SL|Sublingual Route of Administration|C0001565|||C0001565|NCI|||  
SL|Sublingual Route of Drug Administration|C0001565|||C0001565|MTH|||  
SL|Sublingual route|C0001565;C0521136|||C0001565|SNOMEDCT|||  
SL|Sublingual route (qualifier value)|||C0001565|SNOMEDCT|||  
SL|Sublingual use|C0001565|||C0001565|SNOMEDCT|||  
SL|SublingualRoute|C0001565|||C0001565|HL7V3.0|||  
SL|Sublingually|||C0001565|SNOMEDCT|||  
SL|Suspensory Ligament|||1|0.0161|  
SL|cardiac sarcolemma|||1|0.019|  
SL|cardiac sarcolemmal|||1|0.0277|  
SL|db sensation level|||1|0.0131|  
SL|layer|C0934502;C1522408;C1561599|||1|0.0204|  
SL|leone sierra|C0037063|||C0037063|CHV|||  
SL|lymphocytes|C0024264;C0200635|||1|0.0161|  
SL|saline lock|C0179694|||C0179694|CHV|||1|  
SL|salt loser|||1|  
SL|sarcolemma|C0036208|||C0036208|AOD;CSP;FMA;GO;LCH;MSH;MTH;NCI;SNOMEDCT;UWDA|||1|  
SL|sarcomere length|||1|0.1153|

SL|satellite-like|||||||1  
SL|scapholunate|||||1|0.0292|1  
SL|sclerosing leukoencephalopathy|||||||1  
SL|sea level|||||1|0.2|  
SL|secondary leukemia|C0856053|||C0856053|CHV|||1  
SL|segment length|||||||1  
SL|sensation level|||||||1  
SL|sensory latency|||||||1  
SL|sentinel lymphadenectomy|||||||1  
SL|septal leaflet|||||||1  
SL|serious list|||||||1  
SL|serotonin level|||||||1  
SL|serum lipid|C0428462|||||||1  
SL|sesquiterpene lactone|C2985517|||C2985517|NCI|1|0.0292|  
SL|sham laparotomy|||||1|0.0088|  
SL|short leg|C0426901|||C0426901|CHV;SNOMEDCT|||1  
SL|sidelying|C0444379|||||||1  
SL|sierra leone|C0037063|||C0037063|CHV|||  
SL|signal level|||||||1  
SL|sleep latency|||||1|0.0161|  
SL|sleeve lobectomy|C2986519|||C2986519|NCI|||  
SL|slice|C1519355|||||||1  
SL|slight|C2937276;C2945599|||||||1  
SL|slit lamp|C0183355;C0419360|||C0183355;C0419360|CHV;NCI;SNOMEDCT|||  
SL|slit-lamp|C0183355;C0419360|||||||1  
SL|slow|C0439834|||||||1  
SL|slyke|||||||1  
SL|small leukocyte|||||||1  
SL|small lymphocyte|C0229616|||||||1  
SL|small lymphocytic  
lymphoma|C0023434;C0855095|||C0023434;C0855095|CHV;MSH;MTH;NCI;PDQ|||  
SL|smear layer|C0085070|||C0085070|CHV;MSH;NDFRT|||  
SL|soda lime|C0074716|||||||1  
SL|sodium  
lactate|C0142874;C1176295|||C0142874;C1176295|CHV;MSH;MTH;MTHSPL;NCI;NDFRT;RXNOR  
M;SNOMEDCT;USPMG;VANDF|1|0.0088|1  
SL|soleus|C0242694;C1305356|||C0242694;C1305356|CHV;FMA;NCI;SNOMEDCT;UWDA|1|0.01  
46|  
SL|solidified liquid|||||||1  
SL|sonoluminescence|||||1|0.019|  
SL|sound level|C0428754|||C0428754|CHV;SNOMEDCT|||1  
SL|soybean lecithin|C1617265|||C1617265|NCI;RXNORM|||  
SL|sphingolipid|C0037900|||C0037900|CHV;CSP;NCI;SNOMEDCT|||  
SL|spin-lock|||||||1  
SL|spinal length|||||||1  
SL|spiral ligament|C0229477|||C0229477|MSH|1|0.019|  
SL|spironolactone|C0037982|||C0037982|AOD;CHV;CSP;LCH;LNC;MSH;MTH;MTHSPL;NCI;NDF  
RT;PDQ;RXNORM;SNOMEDCT;USPMG;VANDF|1|0.0234|  
SL|spleen|C0037993;C1278932|||C0037993;C1278932|AOD;CHV;CSP;FMA;HL7V2.5;LCH;LNC;  
MSH;MTH;NCI;OMIM;SNOMEDCT;UWDA|||  
SL|spliced leader|C0600446|||C0600446|MSH|1|0.1533|  
SL|spotting lethal|||||1|0.0131|  
SL|staging laparoscopy|C0460043|||C0460043|SNOMEDCT|||1  
SL|staging laparotomy|C0843591|||C0843591|CHV|||  
SL|standard laparoscopy|||||||1  
SL|stem-loop|||||1|0.0234|  
SL|step length|C0427126|||C0427126|SNOMEDCT|||

SL|stereolithographic|||||1|0.0131|  
SL|stereolithography|||||1|  
SL|sterically stabilized liposomes|||||1|0.0088|  
SL|stratum lucidum|C0221922|||C0221922|AOD;NCI;SNOMEDCT|||  
SL|streptolysin|C0038419|||C0038419|CHV;CSP;LCH;LNC;MSH;NDFRT|||  
SL|stride length|||||1|0.035|  
SL|stromelysin|C0164371|||C0164371;C1150206|CHV;CSP;GO;MSH;NDFRT|||  
SL|structured lipids|||||1|0.0146|  
SL|sublingual|C0001565;C0558302|1|1.000|C0001565;C0558302|CHV;HL7V2.5;NCI;SNOMED  
CT|1|0.0409|1  
SL|sublingual administration|C0001565|||C0001565|AOD|||  
SL|sublingually|||C0001565|SNOMEDCT|||1  
SL|supraglottic laryngectomy|C0189240|||C0189240|CHV;NCI;SNOMEDCT|||  
SL|surface Laplacian|||||1|0.0131|  
SL|surrogate light|||||1|0.0117|  
SL|surrogate light chain|C0253781|||C0253781|MSH;NDFRT|||  
SMA|Atrophy, Spinal Muscular|C0026847|||C0026847|MSH|||  
SMA|MUSCULAR ATROPHY, SPINAL|C0026847|||C0026847|DXP|||  
SMA|Muscular Atrophy, Spinal|C0026847|||C0026847|MSH;NDFRT|||  
SMA|Muscular Atrophy, Spinal [Disease/Finding]||||C0026847|NDFRT|||  
SMA|SMA|C0026847;C1367790|||C0026847|MEDLINEPLUS|||  
SMA|SMA - Spinal muscular atrophy|C0026847|||C0026847|SNOMEDCT|||  
SMA|SNRPF|C1367790;C1420293|||C1367790|NCI|||  
SMA|SPINAL MUSCLE ATROPHY|C0026847|||C0026847|DXP|||  
SMA|Sm Protein F|C1367790|||C1367790|NCI|||  
SMA|Sm-F|C1367790;C1420293|||C1367790|NCI|||  
SMA|SmF||||C1367790|NCI|||  
SMA|Sma|C0026847;C1367790|||C1367790|NCI|||  
SMA|Small Nuclear Ribonucleoprotein Associated Protein F||||C1367790|MSH|||  
SMA|Small Nuclear Ribonucleoprotein Polypeptide  
F|C1367790;C1420293|||C1367790|MSH;MTH;NCI|||  
SMA|Small Nuclear Ribonucleoprotein-Associated Protein F||||C1367790|MSH|||  
SMA|Smooth muscle alpha-actin|||||1|0.0085|  
SMA|Snow Mountain agent|||||1|0.008|  
SMA|Spinal Muscular Atrophy|C0026847|||C0026847|MEDLINEPLUS;MSH;MTH;NCI;NDFRT|||  
SMA|Spinal muscl atrophy NOS||||C0026847|ICD9CM|||  
SMA|Spinal muscular atrophy|C0026847|||C0026847|ICD9CM;SNOMEDCT|||  
SMA|Spinal muscular atrophy (disorder)|||C0026847|SNOMEDCT|||  
SMA|Spinal muscular atrophy NOS|C0026847|||C0026847|SNOMEDCT|||  
SMA|Spinal muscular atrophy NOS (disorder)|||C0026847|SNOMEDCT|||  
SMA|Spinal muscular atrophy, NOS|C0026847|||C0026847|SNOMEDCT|||  
SMA|Spinal muscular atrophy, unspecified|C0026847|||C0026847|ICD9CM|||  
SMA|Unspecified spinal muscular atrophy|C0026847|||C0026847|SNOMEDCT|||  
SMA|Unspecified spinal muscular atrophy (disorder)|||C0026847|SNOMEDCT|||  
SMA|atrophies muscular spinal||||C0026847|CHV|||  
SMA|atrophy muscular sma spinal||||C0026847|CHV|||  
SMA|atrophy muscular spinal|C0026847|||C0026847|CHV|||  
SMA|atrophy spinal muscular|C0026847|||C0026847|CHV|||  
SMA|muscle actin|||||1|0.0873|  
SMA|muscle spinal atrophy|C0026847|||C0026847|CHV|||  
SMA|muscular atrophy spinal||||C0026847|CHV|||  
SMA|muscular spinal atrophy|C0026847|||C0026847|CHV|||  
SMA|schedule of maximal allowance|||||1|  
SMA|sequential multiple autoanalysis|||||1|  
SMA|sequential multiple autoanalyzer||1|0.168|||1|  
SMA|serum muramidase activity|||||1|  
SMA|shape memory alloy|||||1|0.0038|

SMA|shape-memory alloy|||||||1  
SMA|simultaneous multiple autoanalysis|||||||1  
SMA|simultaneous multiple autoanalyzer|||||||1  
SMA|small mesenteric arteries|||||1|0.0042|  
SMA|small muscle atrophy|||||||1  
SMA|smallpox vaccine, not otherwise specified|C0037355|||||||1  
SMA|smooth muscle|C1267092|||||1|0.009|  
SMA|smooth muscle actin|C1825843|1|0.004|C1825843|OMIM|||1  
SMA|smooth muscle antibodies|||||||1|0.0382|  
SMA|smooth muscle antibody|C0369998|1|0.006|C0369998|CHV;LNC;MTH;SNOMEDCT|||1  
SMA|smooth muscle autoantibody|||||||1  
SMA|snRNP-F|C1367790|||C1367790|NCI|||  
SMA|sorbitol MacConkey agar|||||||1|0.0033|  
SMA|specific methanogenic activity|||||1|0.0061|  
SMA|spinal amyotrophy|C0026847|||C0026847|CHV|||  
SMA|spinal muscle atrophy|C0026847|||C0026847|CHV|||  
SMA|spinal muscular atrophy|C0026847|1|0.112|C0026847|CHV;ICD9CM;MEDLINEPLUS;MSH;MTH;NCI;NDFRT;SNOME DCT|1|0.2825|1  
SMA|spiral modiolar artery|C0226244;C1278423|||C0226244;C1278423|FMA;SNOMEDCT;UWDA|||  
SMA|spontaneous mechanical activities|||||1|0.0024|  
SMA|spontaneous motor activity|||||1|0.0274|1  
SMA|standard method agar|||||||1  
SMA|styrene Maleic anhydride|||||||1|0.0104|  
SMA|superior mesenteric|C1979979|||||1|0.0099|  
SMA|superior mesenteric arterial|||||||1|0.0047|  
SMA|superior mesenteric artery|C0162861|1|0.706|C0162861|CHV;FMA;LNC;MSH;NCI;SNOMEDCT;UWDA|1|0.2665|1  
SMA|supplemental motor area|||||||1  
SMA|supplementary motor|||||||1|0.0042|  
SMA|supplementary motor area|||||||1|0.2193|  
SMA|supplementary motor cortex|||||||1|0.0042|  
SPEP|Serum protein electrophoresis|C0201720|||C0201720|SNOMEDCT|||  
SPEP|Serum protein electrophoresis (procedure)|||C0201720|SNOMEDCT|||  
SPEP|electrophoresis protein serum|C0201720|||C0201720|CHV|||  
SPEP|electrophoresis proteins serum|C0201720|||C0201720|CHV|||  
SPEP|serum electrophoresis protein|C0201720|||C0201720|CHV|||  
SPEP|serum protein electrophoresis|C0201720|1|1.000|C0201720|CHV;SNOMEDCT|||1  
SPEP|ssep|C0201720|||C0201720|CHV|||  
SR|BCSG1|C1335851|||C1335851|HUGO;OMIM|||  
SR|BREAST CANCER-SPECIFIC GENE 1|C1335851;C1709991|||C1335851|OMIM|||  
SR|Dutch Guiana|C0038944|||C0038944|MSH|||  
SR|NS|||C0038944|NCI|||  
SR|Netherlands Guiana|C0038944|||C0038944|MSH|||  
SR|PERSYN|C0753208;C1335851|||C1335851|OMIM|||  
SR|Racer|C0327335|||||1|0.0031|  
SR|SCTR wt Allele|C1705646|||C1705646|MTH;NCI|||  
SR|SNCG|C0753208;C1335851|||C1335851|HUGO;NCI;OMIM|||  
SR|SNCG Gene|C1335851|||C1335851|NCI|||  
SR|SNCG gene|C1335851|||C1335851|HUGO;MTH|||  
SR|SR|||C0038944;C1335851;C1705646;C1710261|HUGO;NCI|||  
SR|STRONTIUM|C0038467|||C0038467|MTHSPL|||  
SR|SUR|C0038880;C0038944;C1412082|||C0038944|NCI|||  
SR|SURINAME|C0038944|||C0038944|NCI|||  
SR|SYNUCLEIN, GAMMA|C0753208;C1335851|||C1335851|OMIM|||  
SR|Saccharopolyspora rectivirgula|C0317734|||||1|0.0021|

SR|Secretin Receptor wt Allele|C1705646|||C1705646|NCI|||  
SR|Senior|C1705825|||C1705825|NCI|||  
SR|Senior - Suffix|C1705825|||C1705825|MTH|||  
SR|Spontaneous Regression|C1710162|||1|0.0019|  
SR|Sr|||C0038467;C1705825|NCI|||  
SR|Sr - Strontium|C0038467|||C0038467|SNOMEDCT|||  
SR|Stereotactic radiosurgery|C0085203|||1|0.0031|  
SR|Stochastic resonance|||1|0.0099|  
SR|Strontium|C0038467|||C0038467|LCH;LNC;MSH;MTH;NCI;NDFRT;RXNORM;SNOMEDCT|||  
SR|Strontium (substance)|||C0038467|SNOMEDCT|||  
SR|Strontium [Chemical/Ingredient]|||C0038467|NDFRT|||  
SR|Strontium preparation|C0038467|||C0038467|SNOMEDCT|||  
SR|Strontium preparation (product)|||C0038467|SNOMEDCT|||  
SR|Strontium, NOS|C0038467|||C0038467|SNOMEDCT|||  
SR|Surinam|C0038944|||C0038944|MSH;SNOMEDCT|||  
SR|Suriname|C0038944|||C0038944|AOD;MSH;MTH;NCI;SNOMEDCT|||  
SR|Suriname (geographic location)|||C0038944|SNOMEDCT|||  
SR|Sustained Release|C1710261|||C1710261|NCI|||  
SR|Sustained Release Dosage Form|C1710261|||C1710261|MTH;NCI|||  
SR|Sustained Release Dose Form|C1710261|||C1710261|NCI|||  
SR|Sweat rate|||1|0.006|  
SR|Sweating rate|||1|0.0045|  
SR|Synuclein, Gamma (Breast Cancer-Specific Protein 1) Gene|||C1335851|NCI|||  
SR|Systematic review|C1955832|||1|0.0027|  
SR|persyn|C0753208;C1335851|||C1335851|HUGO|||  
SR|region|C0017446;C0205147|||1|0.0029|  
SR|resection|C0015252;C0728940|||1|0.0021|  
SR|salt resistant|||1|0.0023|  
SR|sarcolemmal reticular|||1|0.0097|  
SR|sarcolemmal  
reticulum|C0036226|||C0036226|CHV;CSP;FMA;GO;LCH;MSH;NCI;SNOMEDCT;UWDA|1|0.6843|  
1  
SR|sarcolemmal reticulum membranes|||1|0.0012|  
SR|sarcolemmal reticulum vesicles|||1|0.0019|  
SR|saturation recovery|||1|0.0029|1  
SR|scanning radiometer|||1|  
SR|scavenger receptor|C0074129|||C0074129|CHV;CSP;MSH;MTH;NDFRT|1|0.0101|  
SR|scavenger receptors|C0074129|||C0074129|CHV;MSH;NDFRT|||  
SR|schizophrenic reaction|C0151898|||1|  
SR|screen|C0220908;C0430054;C1305399;C1705053|||1|  
SR|secretin  
receptor|C0074254;C1335806|||C0074254;C1335806|HUGO;MSH;MTH;NCI;OMIM|||  
SR|secretion rate|||1|  
SR|sedimentation rate|C0200704;C1176468|||C0200704;C1176468|CHV;NCI;SNOMEDCT|||1  
SR|see report|||1|  
SR|seizure resistant|||1|  
SR|seizure-resistant|||1|0.0066|  
SR|self-recording|||1|  
SR|self-reinforced|||1|0.0025|  
SR|senior|C1705825|||1|  
SR|sensitivity response|||1|  
SR|sensitization response|||1|  
SR|sensory rhodopsin|||1|0.0017|  
SR|sentence repetition|||1|  
SR|sepiapterin  
reductase|C0074350;C1420371|||C0074350;C1420371|MSH;MTH;OMIM;SNOMEDCT|1|0.0027|  
SR|serine-arginine|||1|0.0054|

SR|serine/arginine-rich|||||1|0.0076|  
SR|seroreversion|||||1|  
SR|service record|||||1|  
SR|sex ratio|C0036893|||C0036893|CHV;LCH;MSH|1|0.0025|1  
SR|shift reagent|||||1|0.0014|  
SR|short hair|C2750590|||||1|  
SR|side rails|||||1|  
SR|sigma reaction|||||1|  
SR|silicone rubber|C0037110|||C0037110|CHV;CSP;LCH;MSH;NDFRT|1|0.0041|1  
SR|sinus rhythm|C0232201|||C0232201|CHV;MTH;SNOMEDCT|1|0.0532|1  
SR|skin resistance|C0871375|||C0871375|CHV|1|0.0017|1  
SR|sleep and rest|||||1|  
SR|slew rate|||||1|  
SR|slow release|||||1|  
SR|slow-release|||||1|0.0206|  
SR|smooth-rough|||||1|  
SR|social recreation|||||1|  
SR|soluble repository|||||1|  
SR|somatostatin receptor|C0074830|||C0074830|CHV;MSH;MTH;NCI;NDFRT|||  
SR|spatial resolution|||||1|  
SR|specific release|||||1|  
SR|specific resistance|||||1|  
SR|specific response|||||1|  
SR|speech reception|||||1|  
SR|spontaneous rate|||||1|0.0074|  
SR|spontaneous regression|C1710162|||C1710162|NCI|||  
SR|spontaneous remission|C0035053|||||1|0.0012|1  
SR|spontaneous respiration|C0412771|||||1|0.0014|  
SR|stabilizing reversal|||||1|  
SR|stage of resistance|||||1|  
SR|standard risk|||||1|0.0066|  
SR|stapedial reflex|C0034934|||||1|0.0014|  
SR|stapedius reflex|C0034934|||C0034934|CHV|1|0.0019|  
SR|steradian|C1705832|||||1|  
SR|stereotactic  
radiosurgery|C0085203|||C0085203|CHV;ICD9CM;MSH;MTHHH;NCI;PDQ;SNOMEDCT|||  
SR|steroid receptor|C0034840|||C0034840|CHV;MSH;NDFRT;SNOMEDCT|||  
SR|steroid resistance|||||1|  
SR|steroid-resistant|||||1|0.006|  
SR|stimulation ratio|||||1|  
SR|stimulus response|C0542478|||||1|  
SR|storage phosphor radiography|||||1|0.001|  
SR|strain rate|||||1|0.0068|  
SR|stratum radiatum|||||1|0.0058|  
SR|stress related|||||1|  
SR|stress relaxation|||||1|  
SR|stretch receptor|C0034841|||C0034841|CSP;MSH;SNOMEDCT|||  
SR|stretch reflex|C0034942|||||1|0.0014|1  
SR|strontium|C0038467|||C0038467|AOD;CHV;CSP;NCI|1|0.0171|1  
SR|structured reporting|||||1|  
SR|sulfonamide-resistant|||||1|  
SR|superior  
rectus|C0224128;C0582818|||C0224128;C0582818|CHV;FMA;SNOMEDCT;UWDA|1|0.0039|1  
SR|suriname|C0038944|||C0038944|CHV|||  
SR|survival rate|C0038954|||C0038954|CHV;MSH;NCI|||  
SR|sustained release|C1710261|1|1.000|||||1  
SR|sustained responders|||||1|0.0031|

SR|sustained response|||||1|0.0089|1  
SR|sustained-release|C1710261|||||1|0.0505|  
SR|suture removal|C0184936|||||1|  
SR|synaptic ribbon|C1179874|||C1179874|FMA;GO;UWDA|||  
SR|synaptic ribbons|||||1|0.0039|  
SR|synchronization ratio|||||1|  
SR|synchrotron radiation|C0599746|||C0599746|CSP|1|0.0066|  
SR|synoretin|C0753208;C1335851|||C1335851|HUGO|||  
SR|synuclein, gamma (breast cancer-specific protein 1)||||C1335851|HUGO|||  
SR|systemic reaction|C1710276|||C1710276|NCI|1|0.0043|1  
SR|systemic resistance|||||1|  
SR|systems research|||||1|  
SR|systems review|||||1|  
SS|5' splice site|C0887917|||||1|0.0032|  
SS|AFND|C0085077;C1863616|||C0085077|OMIM|||  
SS|Acute Febrile Neutrophilic Dermatitis|C0085077|||C0085077|MSH;NDFRT|||  
SS|Acute febrile neutrophilic dermatosis|C0085077|||C0085077|SNOMEDCT|||  
SS|Acute febrile neutrophilic dermatosis (disorder)||||C0085077|SNOMEDCT|||  
SS|BLOOD GROUP--Ss LOCUS|C1415374|||C1415374|OMIM|||  
SS|CD235b|C1415374|||C1415374|HUGO|||  
SS|Dahl salt-sensitive|||||1|0.0088|  
SS|Dermatitis, Neutrophilic, Febrile, Acute|C0085077|||C0085077|MSH;NDFRT|||  
SS|Febrile neutrophilic dermatosis|C0085077|||C0085077|SNOMEDCT|||  
SS|GCFX|C1420041|||C1420041|HUGO|||  
SS|GLYCOPHORIN B|C0017957;C1415374|||C1415374|OMIM|||  
SS|GOMM-BUTTON DISEASE|C0085077;C2931897|||C0085077|OMIM|||  
SS|GPB|C1415192;C1415374|||C1415374|HUGO;OMIM|||  
SS|GYPB|C1415374|||C1415374|HUGO;OMIM|||  
SS|GYPB gene|C1415374|||C1415374|HUGO;MTH|||  
SS|Malignant synovioma|C0039101|||C0039101|SNOMEDCT|||  
SS|NEUTROPHILIC DERMATOSIS, ACUTE FEBRILE|C0085077|||C0085077|OMIM|||  
SS|Neutrophilic Dermatitis, Acute Febrile|C0085077|||C0085077|MSH;NDFRT|||  
SS|PHOG|C1420041|||C1420041|HUGO;OMIM|||  
SS|PSEUDOAUTOSOMAL HOMEBOX-CONTAINING OSTEOGENIC GENE|||C1420041|OMIM|||  
SS|SARCOMA, SYNOVIAL|C0039101|||C0039101|OMIM|||  
SS|SHORT STATURE HOMEBOX|C1420041|||C1420041|OMIM|||  
SS|SHORT STATURE HOMEBOX, Y-LINKED|||C1420041|OMIM|||  
SS|SHOX|C1420041|||C1420041|HUGO;NCI;OMIM|||  
SS|SHOX Gene|C1420041|||C1420041|NCI|||  
SS|SHOX gene|C1420041|||C1420041|HUGO;LNC;MTH|||  
SS|SHOXY|C1420041|||C1420041|HUGO;OMIM|||  
SS|SICCA|C0086981|||C0086981|NCI|||  
SS|SICCA SYNDROME|C0086981|||C0086981|CST;DXP;OMIM|||  
SS|SS|||C0039101;C0085077;C0086981;C1415374;C1420041|DXP;HUGO;NCI;OMIM|||  
SS|SWEET SYNDROME|C0085077|||C0085077|OMIM|||  
SS|SWEET'S SYNDROME|C0085077|||C0085077|DXP|||  
SS|SYNDROME SICCA|C0086981|||C0086981|CST|||  
SS|Salmonella-Shigella|||||1|0.004|1  
SS|Sarcoma, Synovial|C0039101|||C0039101|MSH;NDFRT|||  
SS|Sarcoma, Synovial [Disease/Finding]|||C0039101|NDFRT|||  
SS|Sarcomas, Synovial|C0039101|||C0039101|MSH|||  
SS|Schizophrenia Subscale|||||1|  
SS|Seizure-sensitive|||||1|0.0128|  
SS|Septic shock|C0036983|||||1|0.0072|  
SS|Short Stature Homeobox Gene|C1420041|||C1420041|NCI|||  
SS|Sicca Syndrome|C0086981|||C0086981|MSH;MTH;NCI|||  
SS|Sicca syndrome|C0086981|||C0086981|ICD9CM;SNOMEDCT|||

SS|Sicca syndrome (disorder)|||C0086981|SNOMEDCT|||  
SS|Social Security|C0037435|||1  
SS|Ss|||C1415374;C1552161|HL7V3.0;OMIM|||  
SS|Supernumerary mandibular right first primary molar|C1552161|||C1552161|MTH|||  
SS|Sweet Syndrome|C0085077|||C0085077|MSH;MTH;NCI;NDFRT|||  
SS|Sweet Syndrome [Disease/Finding]|||C0085077|NDFRT|||  
SS|Sweet's Syndrome|C0085077|||C0085077|COSTAR;MSH;NDFRT|||  
SS|Sweet's disease|C0085077|||C0085077|SNOMEDCT|||  
SS|Sweet's syndrome|C0085077|||C0085077|SNOMEDCT|||  
SS|Sweets Syndrome|C0085077|||C0085077|MSH|||  
SS|Syndrome, Sicca|C0086981|||C0086981|MSH|||  
SS|Syndrome, Sweet|C0085077|||C0085077|MSH|||  
SS|Syndrome, Sweet's|C0085077|||C0085077|MSH|||  
SS|Synovial Sarcoma|C0039101|||C0039101|MSH;NCI|||  
SS|Synovial Sarcomas|C0039101|||C0039101|MSH|||  
SS|Synovial sarcoma|C0039101|||C0039101|SNOMEDCT|||  
SS|Synovial sarcoma (disorder)|||C0039101|SNOMEDCT|||  
SS|Synovial sarcoma (morphologic abnormality)|||C0039101|SNOMEDCT|||  
SS|Synovial sarcoma, NOS|C0039101|||C0039101|SNOMEDCT|||  
SS|Synovioma|C0039101|||C0039101|LCH;MSH;NDFRT;SNOMEDCT|||  
SS|Synovioma, NOS|C0039101|||C0039101|SNOMEDCT|||  
SS|Synovioma, malignant|C0039101|||C0039101|SNOMEDCT|||  
SS|Synoviomias|C0039101|||C0039101|MSH|||  
SS|Systolic shortening|||1|0.004|  
SS|[M]Synovial sarcoma NOS|||C0039101|SNOMEDCT|||  
SS|[M]Synovioma NOS|||C0039101|SNOMEDCT|||  
SS|febrile neutrophilic dermatosis|C0085077|||C0085077|CHV|||  
SS|glands from patients with Sjogren's syndrome|||1|0.002|  
SS|glycophorin B (MNS blood group)|||C1415374|HUGO|||  
SS|half|C2825407|||1  
SS|homozygous|C0019904|||1|0.0072|  
SS|homozygous sickle cell|||1|0.0494|  
SS|sacral sulcus|C1562319|||1  
SS|sacrosciatic|||1  
SS|sagittal sinus|C0447120|||C0447120|CHV;NCI;SNOMEDCT|||  
SS|saikosaponin|C0073959|||C0073959|MSH|||  
SS|salbutamol sulfate|C0543495|||C0543495|CHV;PDQ;SNOMEDCT|1|0.0024|  
SS|saline|C0036082|||1|0.006|  
SS|saline soak|||1  
SS|saline solution|C0036082|||C0036082|CHV;MSH;MTH;MTHFDA;RXNORM|1|0.0052|1  
SS|saliva sample|||1  
SS|saliva substitute|C0036088|||1  
SS|salt sensitive|||1|0.0056|  
SS|salt sensitivity|||1  
SS|salt substitute|C0784217|||1  
SS|sarcoma synovial|||C0039101|CHV|||  
SS|saturated solution|||1  
SS|schizophrenia spectrum|||1  
SS|scleral spur|C0229116;C1281274|||1  
SS|scleroderma systematica|||1|0.0052|  
SS|segmental shortening|||1|0.0032|  
SS|seizure sensitive|||1  
SS|self-stimulation|C0036602|||1|0.0309|  
SS|sensation seeking|C0871336|||C0871336|CHV|||  
SS|sensitivity|C0036667;C0312418;C0427965;C1511883;C1522640;C2346484;C2349185|||  
||1|0.004|  
SS|sensu stricto|||1|0.0068|

SS|sepsis syndrome|C0242966|||C0242966|CHV;MSH;NDFRT;SNOMEDCT|||  
SS|septic  
shock|C0036983|||C0036983|CHV;COSTAR;CSP;DXP;ICD9CM;MEDLINEPLUS;MSH;MTH;NCI;NDFRT;SNOMEDCT|||1  
SS|serotonin  
syndrome|C0024586;C0699828|||C0024586;C0699828|CHV;MSH;MTH;NDFRT;SNOMEDCT|||1  
SS|serum|C0229671;C1546774;C1550100|||1|0.0036|  
SS|serum sickness|C0036830;C1963234|||1|  
SS|serum soluble|||1|  
SS|severity score|C0457451|||C0457451|CHV;SNOMEDCT|||  
SS|sewage sludge|||1|0.0032|  
SS|shear stress|C1171318|||C1171318|CHV;CSP|1|0.012|  
SS|short  
stature|C0013336;C0349588|||C0013336;C0349588;C2919142|CHV;CST;ICD9CM;MTH;NCI;OMIM;SNOMEDCT|1|0.0048|1  
SS|short stature homeobox|C1420041|||C1420041|HUGO|||  
SS|short stay|C1698490|||1|  
SS|siblings|C0037047|||1|  
SS|sicca  
syndrome|C0086981|||C0086981|CHV;CSP;CST;DXP;ICD9CM;MSH;MTH;NCI;OMIM;SNOMEDCT|||  
SS|sickle cell|C0221283|||C0221283|CHV;NCI;SNOMEDCT|||1  
SS|sickle cell anaemia|C0002895;C2700574|||1|0.0052|  
SS|sickle cell  
anemia|C0002895;C2700574|||C0002895;C2700574|AOD;CCS;CHV;COSTAR;CSP;DXP;LNC;MEDLINEPLUS;MSH;NCI;NDFRT;OMIM;QMR;SNOMEDCT|1|0.0422|  
SS|sickle cell disease|C0002895|||1|0.0072|  
SS|sickle cell genotype SS||1|0.008|||  
SS|side-to-side|C0516750|||1|  
SS|sidestream smoke|||1|0.0064|  
SS|sigmoid sinus|C0226865;C1281038|||C0226865;C1281038|CHV;FMA;SNOMEDCT;UWDA|||  
SS|signs and symptoms|C0037088|||1|  
SS|simple spike|||1|0.008|  
SS|single session|||1|  
SS|single stranded|||1|  
SS|single strength||1|0.878|||1|  
SS|single-strand|C1979975|||1|0.0173|  
SS|single-stranded|||1|0.1951|  
SS|skull series|||1|  
SS|slice select|||1|  
SS|sliding scale|C2937251|||1|  
SS|slip sent|||1|  
SS|slow sleep|C0234451|||C0234451|SNOMEDCT|||  
SS|slow wave sleep|C0234451|||C0234451|CHV;CSP;SNOMEDCT|||  
SS|slow-wave sleep|C0234451|||1|  
SS|small|C0700321|||1|0.004|  
SS|small subunit|||1|0.006|  
SS|smoking status|C1519386|||1|  
SS|soapsuds|||1|  
SS|social services|C0037440;C0037441|||1|  
SS|social  
support|C0037438;C0748877;C1540833|||C0037438;C0748877;C1540833|AOD;CHV;MSH;MTH;NCI;SNOMEDCT|1|0.0048|  
SS|sodium saccharin|C0917900|||C0917900|CHV|||  
SS|sodium  
salicylate|C0037549|||C0037549|AOD;CHV;LNC;MSH;NCI;NDFRT;PDQ;RXNORM;SNOMEDCT;VANDF|1|0.0108|

SS|sodium  
selenite|C0142923||C0142923|CHV;MSH;MTHSPL;NCI;NDFRT;RXNORM;SNOMEDCT;VANDF|1|0.0076|  
SS|somatostatin|C0037659;C1881011||C0037659;C0373723;C1335871;C1881011;C2697526  
|AOD;CHV;CSP;FMA;HUGO;LCH;LNC;MSH;MTH;NCI;NDFRT;OMIM;RXNORM;SNOMEDCT|1|0.23|  
SS|sorbitan sesquioleate|C0074916|||||1  
SS|sparingly soluble|||||1  
SS|special service|||||1  
SS|spermatocytic seminoma|C0334517||C0334517|NCI;SNOMEDCT|1|0.0036|  
SS|sport sheath|||||1  
SS|squalene  
synthase|C0597790;C1414563||C0597790;C1414563|HUGO;MSH;NDFRT;OMIM|1|0.0044|  
SS|ss|||C0086981|CHV||  
SS|stable sarcoidosis|||||1  
SS|staccato syndrome|||||1  
SS|stainless steel|C0038126||C0038126|CHV;MSH;NDFRT;SNOMEDCT|1|0.0349|1  
SS|standard score|C0871421|||||1  
SS|starch synthase|C0038180|||||1|0.0044|  
SS|statistically significant|C0237881|||||1  
SS|steady state|C0678587||C0678587|AOD;CHV||1  
SS|steady-state|C0678587|||||1|0.0261|  
SS|stenosis|C0009814;C0678234;C0947637;C1261287;C2632116|||||1|0.0044|  
SS|sterile solution|||||1  
SS|steroid sensitivity|||||1  
SS|steroid sulfurylation|||||1  
SS|steroid-sensitive|||||1|0.0064|  
SS|straight  
sinus|C0226862;C1281036||C0226862;C1281036|FMA;SNOMEDCT;UWDA|1|0.0032|  
SS|stress-susceptible|||||1|0.0036|  
SS|stromal sarcoma|C0206630;C1370723|||||1  
SS|subaortic stenosis|C0340375|||||1  
SS|subjects|||||1|0.0422|1  
SS|subsarcolemmal|||||1|0.0096|  
SS|subscapularis|C0224233;C0584884|||||1  
SS|subsegmental|||||1  
SS|subsequent sibling|||||1  
SS|subspinale|||||1  
SS|substernal|||||1  
SS|sucrose synthase|C0075485||C0075485|MSH;MTH;SNOMEDCT|1|0.0072|  
SS|suction socket|||||1  
SS|sulindac sulfide|C0075615||C0075615|MSH;NCI||  
SS|sum squares|||||1  
SS|supersaturated|||||1  
SS|supersaturation|||||1|0.004|  
SS|support and stimulation|||||1  
SS|supraspinatus|C0224229;C0584869||C0224229;C0584869|CHV;FMA;NCI;SNOMEDCT;UWDA  
|1|0.0044|  
SS|susceptible|C0231204;C2827758|||||1  
SS|suspended solids|||||1|0.0225|  
SS|suture system|||||1  
SS|sweet syndrome|C0085077||C0085077|CHV||  
SS|sweet's disease|C0085077||C0085077|CHV||  
SS|sweet's syndrome|C0085077||C0085077|CHV||  
SS|sweets syndrome|C0085077||C0085077|CHV||  
SS|symmetrical strength|||||1  
SS|sympathetic stimulation|||||1|0.004|  
SS|synchronized sleep|C0234451||C0234451|AOD;SNOMEDCT|1|0.0052|

SS|synovial sarcoma|C0039101|||C0039101|CHV;MSH;MTH;NCI;SNOMEDCT|1|0.0277|1  
SS|synovioma|C0039101|||C0039101|CHV|||  
SS|syringosubarachnoid shunting|||||1  
SS|system|C0449913;C1553451;C1704459|||||1|0.0076|  
SS|systemic  
scleroderma|C0036421|||C0036421|CHV;CSP;LCH;MSH;MTH;NCI;NDFRT;SNOMEDCT|1|0.0028|  
SS|systemic  
sclerosis|C0036421|||C0036421|CHV;CSP;ICD9CM;MEDLINEPLUS;MSH;NCI;NDFRT;SNOMEDCT|1|0.0329|1  
SS|systolic segment shortening|||||1|0.002|  
SS|xerodermosteosis|C0086981|||C0086981|CSP|||  
SSRI|SSRI|C0360105;C2911696|||C0360105;C2911696|NCI;NDFRT|||  
SSRI|SSRI - Selective serotonin re-uptake  
inhibitor|C0360105|||C0360105|SNOMEDCT|||  
SSRI|SSRIs|C0360105|||C0360105|MEDLINEPLUS|||  
SSRI|Selective Serotonin Reuptake  
Inhibitor|C0360105;C2911696|||C0360105;C2911696|NCI;NDFRT|||  
SSRI|Selective Serotonin Reuptake Inhibitor  
(SSRI)|C0360105;C2911696|||C2911696|NDFRT|||  
SSRI|Selective Serotonin Reuptake Inhibitors|C0360105;C2911696|||C2911696|MSH|||  
SSRI|Selective Serotonin Reuptake Inhibitors  
(SSRIs)|C0360105;C2911696|||C0360105|USPMG|||  
SSRI|Selective serotonin re-uptake inhibitor|C0360105|||C0360105|MTH;SNOMEDCT|||  
SSRI|Selective serotonin re-uptake inhibitor (product)|||C0360105|SNOMEDCT|||  
SSRI|Selective serotonin re-uptake inhibitor (substance)|||C0360105|SNOMEDCT|||  
SSRI|Selective serotonin reuptake  
inhibitors|C0360105;C2911696|||C0360105|MEDLINEPLUS|||  
SSRI|Serotonin Reuptake Inhibitor|C0162758;C2911696|||C2911696|NDFRT|||  
SSRI|Serotonin Reuptake Inhibitor (SSRI)|C0162758;C2911696|||C2911696|NDFRT|||  
SSRI|Serotonin Reuptake Inhibitor [EPC]|C2911696|||C2911696|MTH;NDFRT|||  
SSRI|selective serotonin reuptake  
inhibitor|C0360105;C2911696|1|1.000|C0360105;C2911696|NCI;NDFRT|1|1|1  
STD|DEHYDROEPIANDROSTERONE SULFOTRANSFERASE|C0057278;C1420519|||C1420519|OMIM|||  
STD|DHEA SULFOTRANSFERASE|C0057278;C1420519|||C1420519|OMIM|||  
STD|DHEA-ST|C1420519|||C1420519|HUGO|||  
STD|DHEAST|C1420519|||C1420519|OMIM|||  
STD|DISEASE (VD), VENEREAL|C0036916|||C0036916|NCI|||  
STD|Disease with a predominantly sexual mode of  
transmission|C0036916|||C0036916|SNOMEDCT|||  
STD|Disease, Sexually Transmitted|C0036916|||C0036916|MSH|||  
STD|Disease, Venereal|C0036916|||C0036916|MSH|||  
STD|Diseases, Sexually Transmitted|C0036916|||C0036916|MSH|||  
STD|Diseases, Venereal|C0036916|||C0036916|MSH|||  
STD|PROTEIN TYROSINE KINASE ZAP70|C1421567;C1527940|||C1421567|OMIM|||  
STD|SELECTIVE T-CELL DEFECT|C1867549|||C1867549|OMIM|||  
STD|SELECTIVE T-CELL DEFECT GENE|C1867549|||C1867549|MTH|||  
STD|SEX TRANSM DIS|||C0036916|MSH|||  
STD|SEXUALLY TRANSMITTED DISEASE NOS|C0036916|||C0036916|COSTAR|||  
STD|SRK|||C1421567;C1705831|NCI;OMIM|||  
STD|ST-segment depression|C0520887|||||1|0.01|1  
STD|STD|||C0036916;C1420519;C1421567;C1705831;C1867549|AOD;CHV;CSP;HUGO;MEDLINE  
PLUS;NCI;OMIM|||  
STD|STD - Sexually transmitted disease|C0036916|||C0036916|SNOMEDCT|||  
STD|STDs|C0036916|||C0036916|CHV;MEDLINEPLUS;MSH;NDFRT|||  
STD|SULFOTRANSFERASE FAMILY 2A, DEHYDROEPIANDROSTERONE-PREFERRING, MEMBER  
1|C1420519|||C1420519|OMIM|||

STD|SULFOTRANSFERASE, DEHYDROEPIANDROSTERONE-  
 PREFERRING|C1420519|||C1420519|OMIM|||  
 STD|SULT2A1|C1420519|||C1420519|HUGO;OMIM|||  
 STD|SULT2A1 gene|C1420519|||C1420519|HUGO;MTH|||  
 STD|SYK-RELATED TYROSINE KINASE|C0246976;C1421567;C1527940|||C1421567|OMIM|||  
 STD|Saturation transfer difference|||1|0.0111|  
 STD|Sexually Transmitted Disease|C0036916|||C0036916|MSH|||  
 STD|Sexually Transmitted  
 Diseases|C0036916|||C0036916|MEDLINEPLUS;MSH;MTH;NDFRT|||  
 STD|Sexually Transmitted Diseases [Disease/Finding]|||C0036916|NDFRT|||  
 STD|Sexually Transmitted Disorder|C0036916|||C0036916|NCI|||  
 STD|Sexually Transmitted Infection|C0036916|||C0036916|NCI|||  
 STD|Sexually transmissible disease|C0036916|||C0036916|SNOMEDCT|||  
 STD|Sexually transmitted disease|C0036916|||C0036916|SNOMEDCT|||  
 STD|Sexually transmitted disease, NOS|C0036916|||C0036916|SNOMEDCT|||  
 STD|Sexually transmitted diseases|C0036916|||C0036916|LCH;LNC;SNOMEDCT|||  
 STD|Sexually transmitted infections|C0036916|||C0036916|MEDLINEPLUS|||  
 STD|Sexually transmitted infectious disease|||C0036916|SNOMEDCT|||  
 STD|Sexually transmitted infectious disease (disorder)|||C0036916|SNOMEDCT|||  
 STD|Sexually transmitted infectious disease, NOS|||C0036916|SNOMEDCT|||  
 STD|Statutory venereal disease|C0036916|||C0036916|SNOMEDCT|||  
 STD|VD|C0036916|||C0036916|CHV;NCI|||  
 STD|VD - Venereal disease|C0036916|||C0036916|SNOMEDCT|||  
 STD|VD, VENEREAL DISEASE|C0036916|||C0036916|NCI|||  
 STD|VENEREAL DIS|||C0036916|MSH|||  
 STD|VENEREAL DISEASE|C0036916|||C0036916|DXP;NCI|||  
 STD|VENEREAL DISEASE (VD)|C0036916|||C0036916|NCI|||  
 STD|Venereal Disease|C0036916|||C0036916|MEDLINEPLUS;MSH|||  
 STD|Venereal Diseases|C0036916|||C0036916|MSH;MTH;NDFRT|||  
 STD|Venereal disease|C0036916|||C0036916|MEDLINEPLUS;SNOMEDCT|||  
 STD|Venereal disease (disorder)|||C0036916|SNOMEDCT|||  
 STD|Venereal disease NOS|C0036916|||C0036916|ICD9CM;SNOMEDCT|||  
 STD|Venereal disease NOS (disorder)|||C0036916|SNOMEDCT|||  
 STD|Venereal disease, NOS|C0036916|||C0036916|SNOMEDCT|||  
 STD|Venereal disease, unspecified|C0036916|||C0036916|ICD9CM|||  
 STD|Venereal diseases|C0036916|||C0036916|SNOMEDCT|||  
 STD|ZAP-70|C1421567;C1527940;C1705831|||C1421567;C1705831|HUGO;NCI|||  
 STD|ZAP-70 Gene|C1705831|||C1705831|NCI|||  
 STD|ZAP70|C1421567;C1527940;C1705831|||C1421567;C1705831|HUGO;LNC;NCI;OMIM|||  
 STD|ZAP70 Gene|C1421567;C1705831|||C1421567|NCI|||  
 STD|ZAP70 gene|C1421567;C1705831|||C1421567|HUGO;MTH|||  
 STD|ZAP70 wt Allele|C1705831|||C1705831|MTH;NCI|||  
 STD|ZETA-ASSOCIATED PROTEIN, 70-KD|||C1421567|OMIM|||  
 STD|ZETA-CHAIN-ASSOCIATED PROTEIN KINASE|C1421567;C1527940|||C1421567|OMIM|||  
 STD|Zeta-Chain (TCR) Associated Protein Kinase 70kDa Gene|||C1421567|NCI|||  
 STD|Zeta-Chain (TCR) Associated Protein Kinase 70kDa wt  
 Allele|||C1705831|NCI|||  
 STD|[X]Infections with a predominantly sexual mode of  
 transmission|||C0036916|SNOMEDCT|||  
 STD|[X]Infections with a predominantly sexual mode of transmission  
 (disorder)|||C0036916|SNOMEDCT|||  
 STD|[X]Unspecified sexually transmitted disease|||C0036916|SNOMEDCT|||  
 STD|[X]Unspecified sexually transmitted disease  
 (disorder)|||C0036916|SNOMEDCT|||  
 STD|disease sexually transmit|||C0036916|CHV|||  
 STD|disease sexually transmit|||C0036916|CHV|||  
 STD|disease sexually transmited|||C0036916|CHV|||

STD|disease sexually transmitted||||C0036916|CHV|||  
STD|disease venereal||||C0036916|CHV|||  
STD|diseases sexually transmited||||C0036916|CHV|||  
STD|diseases sexually transmitted||||C0036916|CHV|||  
STD|diseases venereal||||C0036916|CHV|||  
STD|saturated|C0522534;C1705188|||||1  
STD|selective T-cell defect|C1867549|||||1  
STD|seminiferous tubular diameter|||||1|0.0037|  
STD|sexually transmitted  
disease|C0036916|1|1.000|C0036916|AOD;CHV;CSP;MSH;SNOMEDCT|1|0.9483|1  
STD|sexually transmitted disease (STD)|C0036916|||C0036916|CHV|||  
STD|sexually transmitted diseases|C0036916|||C0036916|CHV|||  
STD|sexually transmitted diseases (STDs)|C0036916|||C0036916|CHV|||  
STD|short-term depression|||||1|0.0074|  
STD|short-term disability|||||1  
STD|skin test done|||||1  
STD|skin test dose|||||1  
STD|skin-to-tumor distance|||||1  
STD|sodium tetradecyl sulfate|C0037556|||||1  
STD|source-to-tray distance|||||1  
STD|standard|C1442989;C1548173;C2828392|||||1|0.0195|1  
STD|standard density|||||1  
STD|standard test dose|||||1  
STD|standardized|||||1  
STD|sulfoltransferase family, cytosolic, 2A, dehydroepiandrosterone (DHEA)-  
preferring, member 1||||C1420519|HUGO|||  
STD|vds|C0036916;C0042682|||C0036916|CHV|||  
STD|venereal disease|C0036916|||C0036916|AOD;CHV;CSP|||  
STD|venereal diseases|C0036916|||C0036916|CHV|||  
STD|zeta-chain (TCR) associated protein kinase 70kDa||||C1421567|HUGO|||  
STT|ST-T wave||1|1.000|||  
STT|Schirmer tear test|C0200152;C0493032|||||1|0.0929|  
STT|scaphoid, trapezium, trapezoid|||||1  
STT|scaphotrapeziotrapezoid|||||1  
STT|scaphotrapezoid-trapezoid|||||1  
STT|sensitization test|||||1  
STT|serial thrombin time|||||1  
STT|short-term tests|||||1|0.0328|  
STT|skin temperature test|||||1  
STT|soft tissue tumor|C0037579|||||1  
STT|soft tissue tumors|C0037579|||||1|0.082|  
STT|spinothalamic|||||1|0.1038|  
STT|spinothalamic tract|C0037953;C1283383|||||1|0.6885|1  
STT|standard triple therapy|||||1  
STT|subtotal thyroidectomy|C0193790|||||1  
STT|superficial tibiotalar|||||1  
SVC|SVC|C0231957|||C0231957|SNOMEDCT|||  
SVC|SVC - Slow vital capacity|C0231957|||C0231957|SNOMEDCT|||  
SVC|Slow vital capacity|C0231957|||C0231957|SNOMEDCT|||  
SVC|Slow vital capacity (observable entity)|||C0231957|SNOMEDCT|||  
SVC|saphenous vein cutdown|||||1  
SVC|segmental venous capacitance|||||1  
SVC|selective vascular clamping|||||1  
SVC|selective venous catheterization|||||1  
SVC|slow vital capacity|C0231957|1|0.016|C0231957|CHV;SNOMEDCT|1|0.0364|1  
SVC|slow vital capacity (SVC)|C0231957|||C0231957|CHV|||  
SVC|spring viremia of carp|C0276361|||C0276361|SNOMEDCT|||

SVC|subclavian vein catheter|||||||1  
SVC|subclavian vein catheterization|C1319106|||C1319106|CHV|||1  
SVC|subclavian vein compression|||||||1  
SVC|superior|C1282910|||1|0.0192|  
SVC|superior vena  
cava|C0042459;C1269023|1|0.982|C0042459;C1269023|CHV;FMA;MSH;NCI;SNOMEDCT;UWDA|1  
|0.8927|1  
SVC|superior vena caval|C0521359|||1|0.0517|  
SVC|suprahepatic vena cava|||||||1  
SVC|supraventricular crest|C0225884;C1305151|||||||1  
SVC|svc|C0231957|||C0231957|CHV|||  
SVG|SVG|C2827658|||C2827658|NCI|||  
SVG|Scalable Vector Graphics|C2827658|||C2827658|NCI|||  
SVG|saphenous vein graft|C0729538|1|1.000|||1|0.9167|1  
SVG|sauvagine|C0074087|||1|0.0833|  
SVG|scatter and veiling glare|||||||1  
SVG|seminal vesiculography|C0203133|||||||1  
SVT|STYCAR Vision Test|C0430941|||||||1  
SVT|SUPRAVENTRICULAR TACHYCARDIA|C0039240;C1963244|||C0039240|COSTAR;CST;NCI|||  
SVT|SVT|C0039240|||C0039240|DXP|||  
SVT|SVT - Supraventricular tachycardia|C0039240|||C0039240|SNOMEDCT|||  
SVT|Supraventricular Tachycardia|C0039240;C1963244|||C0039240|MSH;NCI|||  
SVT|Supraventricular Tachycardias|C0039240|||C0039240|MSH|||  
SVT|Supraventricular  
tachycardia|C0039240;C1963244|||C0039240|MTH;NCI;SNOMEDCT|||  
SVT|Supraventricular tachycardia (disorder)|||C0039240|SNOMEDCT|||  
SVT|Supraventricular tachycardia NOS|C0039240;C1963244|||C0039240|SNOMEDCT|||  
SVT|Supraventricular tachycardia NOS (disorder)|||C0039240|SNOMEDCT|||  
SVT|Supraventricular tachycardia, NOS|C0039240;C1963244|||C0039240|SNOMEDCT|||  
SVT|TACHYCARDIA SUPRAVENTRICULAR|||C0039240|CST|||  
SVT|TACHYCARDIA, SUPRAVENTRICULAR|C0039240;C1963244|||C0039240|DXP|||  
SVT|Tachycardia, Supraventricular|C0039240;C1963244|||C0039240|MSH;NDFRT|||  
SVT|Tachycardia, Supraventricular [Disease/Finding]|||C0039240|NDFRT|||  
SVT|Tachycardias, Supraventricular|C0039240|||C0039240|MSH|||  
SVT|sinoventricular tachyarrhythmia|||||||1  
SVT|sinus venous thrombosis|C0740384|||1|0.0106|  
SVT|sinus-vein thrombosis|||||||1  
SVT|subclavian vein thrombosis|C0749087|||C0749087|CHV|||1  
SVT|superficial vein thrombosis|C0235511|||1|0.0255|1  
SVT|superficial venous thrombosis|C0235511|||1|0.0149|  
SVT|supraventricular|||||||1|0.0191|  
SVT|supraventricular tachyarrhythmia||1|1.000|||1  
SVT|supraventricular tachyarrhythmias|||||||1|0.0723|  
SVT|supraventricular tachycardia|C0039240;C1963244|||C0039240|CHV|1|0.8574|  
SVT|supraventricular tachycardias|C0039240|||C0039240|CHV|||  
SVT|sustained ventricular tachycardia|C0750197|||C0750197|CHV;NCI;SNOMEDCT|||1  
SVT|symptom validity test|C0589097|||||||1  
SVT|tachycardia supraventricular|||C0039240|CHV|||  
T&A|tonsillectomy and adenoidectomy|C0193959|1|1.000|C0193959|SNOMEDCT|1|1|1  
T&A|tonsils and adenoids|||C0580788;C1284098;C2362558|MEDLINEPLUS;SNOMEDCT|||1  
T1|1 month|C1442451|||1|0.017|  
T1|1/R1|||C2697938|NCI|||  
T1|AAC1|C1335833;C1417602|||C1335833|OMIM|||  
T1|ADENINE NUCLEOTIDE TRANSLOCATOR  
1|C0600149;C1335833;C1442881|||C1335833|OMIM|||  
T1|ADP-ATP Translocase-1|C1442881|||C1442881|NCI|||  
T1|ADP/ATP CARRIER 1|C1335833|||C1335833|OMIM|||

T1|ADP/ATP TRANSLOCASE 1|C1442881|||C1335833|OMIM|||  
T1|ADP/ATP TRANSLOCATOR OF SKELETAL MUSCLE|||C1335833|OMIM|||  
T1|ANT|C0003455|||C1335833;C1442881;C1705600|NCI;OMIM|||  
T1|ANT1|C1826706|||C1335833;C1442881;C1705600|NCI;OMIM|||  
T1|Adenine Nucleotide Translocator-1|C0600149;C1335833;C1442881|||C1442881|NCI|||  
T1|CD5|||C1413227|HUGO;NCI;OMIM|||  
T1|CD5 Gene|C1413227|||C1413227|NCI|||  
T1|CD5 Molecule Gene|C1413227|||C1413227|NCI|||  
T1|CD5 Molecule wt Allele|C2347263|||C2347263|NCI|||  
T1|CD5 gene|C1413227|||C1413227|HUGO;MTH|||  
T1|CD5 molecule|C0054964;C1413227|||C1413227|HUGO|||  
T1|CD5 wt Allele|C2347263|||C2347263|MTH;NCI|||  
T1|DER4|C1416400|||C1416400|HUGO|||  
T1|FIT-1|C1416400|||C1416400|HUGO|||  
T1|GROWTH STIMULATION-EXPRESSED GENE, MOUSE, HOMOLOG OF|||C1416400|OMIM|||  
T1|Heart-Skeletal Muscle ADP-ATP Carrier Protein-T1|C1442881|||C1442881|NCI|||  
T1|IKBKBBP|C2677743|||C2677743|HUGO|||  
T1|IL1RL1|C1416400|||C1416400|HUGO;OMIM|||  
T1|IL1RL1 gene|C1416400|||C1416400|HUGO;MTH|||  
T1|IL33R|C1416400|||C1416400|HUGO;OMIM|||  
T1|INTERLEUKIN 1 RECEPTOR-LIKE 1|C1416400|||C1416400|OMIM|||  
T1|INTERLEUKIN 33 RECEPTOR|C1416400|||C1416400|OMIM|||  
T1|KIAA1882|C2677743|||C2677743|HUGO;OMIM|||  
T1|LEU1|||C1413227;C2347263|NCI;OMIM|||  
T1|LYMPHOCYTE ANTIGEN CD5|C0054964;C1413227|||C1413227|OMIM|||  
T1|Longitudinal Relaxation Time|C2697938|||C2697938|MTH;NCI|||  
T1|Ly1, MOUSE, HOMOLOG OF|||C1413227|OMIM|||  
T1|MRT13|C2677743;C2750791|||C2677743|HUGO|||  
T1|Mitochondrial Adenine Nucleotide Translocator Solute Carrier Family 25 Member-4|C1442881|||C1442881|NCI|||  
T1|NIBP|C2677743|||C2677743|HUGO;OMIM|||  
T1|NIK- AND IKKBK-BINDING PROTEIN|||C2677743|OMIM|||  
T1|PEO2|C1705600;C2711773|||C1705600|NCI|||  
T1|PEO3|C1705600|||C1705600|NCI|||  
T1|SLC25A4|C1335833|||C1335833|HUGO;NCI;OMIM|||  
T1|SLC25A4 Gene|C1335833|||C1335833|NCI|||  
T1|SLC25A4 gene|C1335833|||C1335833|HUGO;LNC;MTH|||  
T1|SLC25A4 protein, human|C1442881|||C1442881|MTH|||  
T1|SLC25A4 wt Allele|C1705600|||C1705600|MTH;NCI|||  
T1|SOLUTE CARRIER FAMILY 25 (MITOCHONDRIAL CARRIER, ADENINE NUCLEOTIDE TRANSLOCATOR), MEMBER 4|||C1335833|OMIM|||  
T1|ST2|C0450499;C1416400;C1420442|||C1416400|HUGO;OMIM|||  
T1|ST2, MOUSE, HOMOLOG OF|||C1416400|OMIM|||  
T1|ST2L|C1416400;C1539983|||C1416400|HUGO|||  
T1|ST2V|C1416400|||C1416400|HUGO|||  
T1|Skeletal Muscle Adenine Nucleotide Translocator-1|C1442881|||C1442881|NCI|||  
T1|Solute Carrier Family 25 (Mitochondrial Carrier; Adenine Nucleotide Translocator), Member 4 Gene|||C1335833|NCI|||  
T1|Solute Carrier Family 25 (Mitochondrial Carrier; Adenine Nucleotide Translocator), Member 4 wt Allele|||C1705600|NCI|||  
T1|Spin-Lattice Relaxation Time|C2697938|||C2697938|NCI|||  
T1|Spin-lattice|||1|0.1396|  
T1|Spin-lattice relaxation|||1|0.0146|  
T1|T1|||C0475372;C1179687;C1335833;C1413227;C1416400;C1442881;C1705600;C2347263;C2677743;C2697938|FMA;HUGO;NCI;OMIM;SNOMEDCT;UWDA|||  
T1|T1 (MRI)|||0.206|||

T1|T1 Cancer Stage Finding|C0475372|||C0475372|NCI|||  
T1|T1 Primary Tumor Finding|C0475372|||C0475372|NCI|||  
T1|T1 Primary Tumor Stage Finding|C0475372|||C0475372|NCI|||  
T1|T1 Stage|C0475372|||C0475372|NCI|||  
T1|T1 Stage Finding|C0475372|||C0475372|NCI|||  
T1|T1 TNM Finding|C0475372|||C0475372|NCI|||  
T1|T1 Tumor Finding|C0475372|||C0475372|NCI|||  
T1|T1 Tumor Stage|C0475372|||C0475372|NCI|||  
T1|T1 category|C0475372|||C0475372|SNOMEDCT|||  
T1|T1 category (finding)|||C0475372|SNOMEDCT|||  
T1|T1 innervation|C1179687|||C1179687|MTH|||  
T1|T1 stage|C0475372|||C0475372|SNOMEDCT|||  
T1|T1 stage (finding)|C0475372|||C0475372|SNOMEDCT|||  
T1|T1 stage (tumor staging)|||C0475372|SNOMEDCT|||  
T1|TRAFFICKING PROTEIN PARTICLE COMPLEX, SUBUNIT 9|||C2677743|OMIM|||  
T1|TRAPP 120 kDa subunit|C2677743|||C2677743|HUGO|||  
T1|TRAPPC9|C2677743|||C2677743|HUGO;OMIM|||  
T1|TRAPPC9 gene|C2677743|||C2677743|HUGO;MTH|||  
T1|TRS120|C2677743|||C2677743|HUGO|||  
T1|Time 1|||1|0.034|  
T1|Tumor Stage T1|C0475372|||C0475372|NCI|||  
T1|Tumor stage T1|C0475372|||C0475372|MTH;SNOMEDCT|||  
T1|Tumour stage T1|C0475372|||C0475372|SNOMEDCT|||  
T1|admission|C0184666;C0809949|||1|0.0146|  
T1|baseline|C0168634;C1442488|||1|0.0583|  
T1|beginning|C0439659|||1|0.0182|  
T1|control group|C0009932|||1|0.0061|  
T1|degrees C|C0439237|||1|0.0121|  
T1|early|C1279919|||1|0.0182|  
T1|first|C0205435;C1279901|||1|0.0316|  
T1|first response|||1|0.0243|  
T1|first thoracic|||1|0.0109|  
T1|first thoracic (t1) nerve|||C1179687|CHV|||  
T1|first thoracic vertebra|C0459933|||C0459933|FMA;SNOMEDCT;UWDA|||  
T1|first twitch|||1|0.0607|  
T1|first twitch of the TOF|||1|0.0036|  
T1|first twitch of the train-of-four|||1|0.0085|  
T1|homolog of mouse growth stimulation-expressed|||C1416400|HUGO|||  
T1|hours|C0439227|||1|0.0109|  
T1|induction of anesthesia|C0853212|||1|0.0085|  
T1|interleukin 1 receptor-like 1|C1416400|||C1416400|HUGO|||  
T1|later|||1|0.0218|  
T1|longitudinal|C0205127|||1|0.0655|  
T1|longitudinal relaxation|||1|0.017|  
T1|longitudinal relaxation time|C2697938|||C2697938|MTH;NCI|||  
T1|lowest excited triplet|||1|0.0049|  
T1|months|C0439231|||1|0.0316|  
T1|period|C0439531;C1948053|||1|0.0158|  
T1|phase|C0205390|||1|0.0121|  
T1|solute carrier family 25 (mitochondrial carrier; adenine nucleotide translocator), member 4|||C1335833|HUGO|||  
T1|spin-lattice relaxation time|C2697938|||1|0.2512|  
T1|stage|C0205390;C1300072;C1306673|||1|0.0109|  
T1|t1|||C1179687|CHV|||  
T1|term 1|||1|0.002|||  
T1|therapy|C0039798;C0087111;C1363945|||1|0.0146|  
T1|thoracic (level) 1|||1|0.388|||

T1|trafficking protein particle complex 9|||C2677743|HUGO|||  
T1|tularik gene 1|C2677743|||C2677743|HUGO|||  
T1|tumor stage 1||1|0.396|||  
T1|twitch height|||1|0.0291|  
T1|type 1|C0441729|||C0441729|CHV;SNOMEDCT|1|0.034|  
T1|type 1 (diabetes mellitus)|C0011854;C2984334|1|0.002|||  
T2|1/R2|||C2700066|NCI|||  
T2|2F1|||C1335834;C1442882;C1705601|HUGO;NCI|||  
T2|6 months later|||1|0.018|  
T2|AAC2|||C1335834|OMIM|||  
T2|ACAT|||C1412111|OMIM|||  
T2|ACAT1|C1412111;C1420304|||C1412111|HUGO;OMIM|||  
T2|ACAT1 gene|C1412111|||C1412111|HUGO;MTH|||  
T2|ACETOACETYL-CoA THIOLASE, MITOCHONDRIAL|C1412111|||C1412111|OMIM|||  
T2|ACETYL-CoA ACETYLTRANSFERASE 1|C1412111|||C1412111|OMIM|||  
T2|ADENINE NUCLEOTIDE TRANSLOCATOR  
2|C0600150;C1335834;C1442882|||C1335834|OMIM|||  
T2|ADP-ATP Translocase-2|C1442882|||C1442882|NCI|||  
T2|ADP/ATP CARRIER 2|C1335834|||C1335834|OMIM|||  
T2|ADP/ATP TRANSLOCASE 2|C1442882|||C1335834|OMIM|||  
T2|ADP/ATP TRANSLOCATOR OF FIBROBLASTS|||C1335834|OMIM|||  
T2|ANT2|C1335834;C1705601|||C1335834;C1705601|NCI;OMIM|||  
T2|Adenine Nucleotide Translocator-  
2|C0600150;C1335834;C1442882|||C1442882|NCI|||  
T2|Fibroblast ADP-ATP Carrier Protein|C1442882|||C1442882|NCI|||  
T2|Fibroblast Adenine Nucleotide Translocator-2|C1442882|||C1442882|NCI|||  
T2|MAT|C0175648|||C1412111|OMIM|||  
T2|MITOCHONDRIAL ACETOACETYL-CoA THIOLASE|C1412111|||C1412111|OMIM|||  
T2|Mitochondrial Adenine Nucleotide Translocator Solute Carrier Family 25  
Member-5|C1442882|||C1442882|NCI|||  
T2|SLC25A5|C1335834|||C1335834|HUGO;NCI;OMIM|||  
T2|SLC25A5 Gene|C1335834|||C1335834|NCI|||  
T2|SLC25A5 gene|C1335834|||C1335834|HUGO;MTH|||  
T2|SLC25A5 protein, human|C1442882|||C1442882|MTH|||  
T2|SLC25A5 wt Allele|C1705601|||C1705601|MTH;NCI|||  
T2|SOLUTE CARRIER FAMILY 25 (MITOCHONDRIAL CARRIER, ADENINE NUCLEOTIDE  
TRANSLOCATOR), MEMBER A5|||C1335834|OMIM|||  
T2|Solute Carrier Family 25 (Mitochondrial Carrier; Adenine Nucleotide  
Translocator), Member 5 Gene|||C1335834|NCI|||  
T2|Solute Carrier Family 25 (Mitochondrial Carrier; Adenine Nucleotide  
Translocator), Member 5 wt Allele|||C1705601|NCI|||  
T2|Solute Carrier Family 25 Member-5|C1442882|||C1442882|NCI|||  
T2|Spin-Spin Relaxation Time|C2700066|||C2700066|NCI|||  
T2|T2|||C0475373;C1179688;C1335834;C1412111;C1442882;C1705601;C2700066|FMA;HUGO  
;NCI;OMIM;SNOMEDCT;UWDA|||  
T2|T2 (MRI)||1|0.454|||  
T2|T2 Cancer Stage Finding|C0475373|||C0475373|NCI|||  
T2|T2 Nodes||1|0.002|||  
T2|T2 Primary Tumor Finding|C0475373|||C0475373|NCI|||  
T2|T2 Primary Tumor Stage Finding|C0475373|||C0475373|NCI|||  
T2|T2 Stage|C0475373|||C0475373|NCI|||  
T2|T2 Stage Finding|C0475373|||C0475373|NCI|||  
T2|T2 TNM Finding|C0475373|||C0475373|NCI|||  
T2|T2 Tumor Finding|C0475373|||C0475373|NCI|||  
T2|T2 Tumor Stage|C0475373|||C0475373|NCI|||  
T2|T2 category|C0475373|||C0475373|SNOMEDCT|||  
T2|T2 category (finding)|||C0475373|SNOMEDCT|||

T2|T2 innervation|C1179688|||C1179688|MTH|||  
T2|T2 stage|C0475373|||C0475373|SNOMEDCT|||  
T2|T2 stage (finding)|C0475373|||C0475373|SNOMEDCT|||  
T2|T2 stage (tumor staging)|||C0475373|SNOMEDCT|||  
T2|T3|||C1335834;C1442882;C1705601|HUGO;NCI|||  
T2|THIL|C1412111|||C1412111|HUGO|||  
T2|Time 2|C0808270|||1|0.0461|  
T2|Transverse Relaxation Time|C2700066|||C2700066|NCI|||  
T2|Transverse Spin Relaxation Time|C2700066|||C2700066|MTH;NCI|||  
T2|Tumor Stage T2|C0475373|||C0475373|NCI|||  
T2|Tumor stage T2|C0475373|||C0475373|MTH;SNOMEDCT|||  
T2|Tumour stage T2|C0475373|||C0475373|SNOMEDCT|||  
T2|acetoacetyl Coenzyme A thiolase|C1412111;C1412112|||C1412111|HUGO|||  
T2|acetyl-CoA acetyltransferase 1|C1412111|||C1412111|HUGO|||  
T2|after treatment|C0001758|||1|0.018|  
T2|degrees C|C0439237|||1|0.016|  
T2|diiodothyronine|||1|0.018|  
T2|discharge|C0012621;C0030685;C2926602|||1|0.0261|  
T2|follow-up|C0589120;C1522577;C1704685|||1|0.0401|  
T2|hours|C0439227|||1|0.0281|  
T2|minutes|C0439232;C0700321;C1282918|||1|0.018|  
T2|mitochondrial acetoacetyl-CoA thiolase|C1412111|||1|0.0341|  
T2|months|C0439231|||1|0.1022|  
T2|period|C0439531;C1948053|||1|0.022|  
T2|postoperatively|||1|0.018|  
T2|relaxation time|||1|0.3908|  
T2|second target|||1|0.014|  
T2|second thoracic|||1|0.014|  
T2|second thoracic (t2) nerve|||C1179688|CHV|||  
T2|second thoracic vertebra|C0459936|||C0459936|FMA;SNOMEDCT;UWDA|||  
T2|solute carrier family 25 (mitochondrial carrier; adenine nucleotide translocator), member 5|||C1335834|HUGO|||  
T2|spin-spin relaxation|||1|0.012|  
T2|stage B|C0441781|||1|0.012|  
T2|term 2||1|0.002|||  
T2|therapy|C0039798;C0087111;C1363945|||1|0.024|  
T2|thoracic (level) 2||1|0.194|||  
T2|time 2|C0808270|||C0808270|LNC|||  
T2|transverse relaxation|||1|0.02|  
T2|tumor stage 2||1|0.332|||  
T2|weeks|C0439230|||1|0.0521|  
T2|years|C0439234|||1|0.022|  
T2|years later|||1|0.0341|  
T3|2F1|||C1335834;C1442882;C1705601|HUGO;NCI|||  
T3|3 months|C1442461|||1|0.0183|  
T3|3,3',5'-triiodothyronine|||1|0.0155|  
T3|3,3',5-tri-iodothyronine|||1|0.0127|  
T3|3,3',5-triiodo-L-thyronine|||C0041014|NCI|||  
T3|3,5,3' Triiodothyronine|||C0041014|SNOMEDCT|||  
T3|AAC2|||C1335834|OMIM|||  
T3|ADENINE NUCLEOTIDE TRANSLOCATOR  
2|C0600150;C1335834;C1442882|||C1335834|OMIM|||  
T3|ADP-ATP Translocase-2|C1442882|||C1442882|NCI|||  
T3|ADP/ATP CARRIER 2|C1335834|||C1335834|OMIM|||  
T3|ADP/ATP TRANSLOCASE 2|C1442882|||C1335834|OMIM|||  
T3|ADP/ATP TRANSLOCATOR OF FIBROBLASTS|||C1335834|OMIM|||  
T3|ANT2|C1335834;C1705601|||C1335834;C1705601|NCI;OMIM|||

T3|Adenine Nucleotide Translocator-  
2|C0600150;C1335834;C1442882|||C1442882|NCI|||  
T3|Fibroblast ADP-ATP Carrier Protein|C1442882|||C1442882|NCI|||  
T3|Fibroblast Adenine Nucleotide Translocator-2|C1442882|||C1442882|NCI|||  
T3|L-3,3',5-triiodothyronine|||1|0.0155|  
T3|L-3,5,3'-triiodothyronine|||1|0.038|  
T3|L-Triiodothyronine|C0041014;C2936843|||C0041014|NCI;PDQ|||  
T3|L-Tyrosine, O-(4-hydroxy-3-iodophenyl)-3,5-diiido-|||C0041014|MSH;NDFRT|||  
T3|L-triiodothyronine|C0041014;C2936843|||1|0.1786|  
T3|L-triiodothyronine preparation|C0041014|||C0041014|SNOMEDCT|||  
T3|LIOTHYRONINE|C0041014|||C0041014|MTHSPL;NCI;NDFRT;VANDF|||  
T3|Liothyronine|C0041014|||C0041014|MSH;NCI;NDFRT;PDQ;SNOMEDCT;USPMG|||  
T3|Liothyronine (product)|||C0041014|SNOMEDCT|||  
T3|Liothyronine (substance)|||C0041014|SNOMEDCT|||  
T3|Mitochondrial Adenine Nucleotide Translocator Solute Carrier Family 25  
Member-5|C1442882|||C1442882|NCI|||  
T3|SLC25A5|C1335834|||C1335834|HUGO;NCI;OMIM|||  
T3|SLC25A5 Gene|C1335834|||C1335834|NCI|||  
T3|SLC25A5 gene|C1335834|||C1335834|HUGO;MTH|||  
T3|SLC25A5 protein, human|C1442882|||C1442882|MTH|||  
T3|SLC25A5 wt Allele|C1705601|||C1705601|MTH;NCI|||  
T3|SOLUTE CARRIER FAMILY 25 (MITOCHONDRIAL CARRIER, ADENINE NUCLEOTIDE  
TRANSLOCATOR), MEMBER A5|||C1335834|OMIM|||  
T3|Solute Carrier Family 25 (Mitochondrial Carrier; Adenine Nucleotide  
Translocator), Member 5 Gene|||C1335834|NCI|||  
T3|Solute Carrier Family 25 (Mitochondrial Carrier; Adenine Nucleotide  
Translocator), Member 5 wt Allele|||C1705601|NCI|||  
T3|Solute Carrier Family 25 Member-5|C1442882|||C1442882|NCI|||  
T3|T AAA THYROID HORMONE 003|||C0041014|MSH|||  
T3|T-3|C0041014|||C0041014|NCI|||  
T3|T2|||C1335834;C1442882;C1705601|HUGO;NCI|||  
T3|T3|||C0041014;C0428419;C0475374;C1235740;C1335834;C1442882;C1705601;C2936843  
|CSP;FMA;HUGO;NCI;NDFRT;SNOMEDCT;UWDA|||  
T3|T3 (ECG pattern)|||0.008|||  
T3|T3 - Liothyronine|C0041014|||C0041014|SNOMEDCT|||  
T3|T3 - Triiodothyronine|C0041014|||C0041014|SNOMEDCT|||  
T3|T3 - Triiodothyronine level|C0428419|||C0428419|SNOMEDCT|||  
T3|T3 Cancer Stage Finding|C0475374|||C0475374|NCI|||  
T3|T3 Primary Tumor Finding|C0475374|||C0475374|NCI|||  
T3|T3 Primary Tumor Stage Finding|C0475374|||C0475374|NCI|||  
T3|T3 Stage|C0475374|||C0475374|NCI|||  
T3|T3 Stage Finding|C0475374|||C0475374|NCI|||  
T3|T3 TNM Finding|C0475374|||C0475374|NCI|||  
T3|T3 Thyroid Hormone|C0041014|||C0041014|MSH;NDFRT|||  
T3|T3 Tumor Finding|C0475374|||C0475374|NCI|||  
T3|T3 Tumor Stage|C0475374|||C0475374|NCI|||  
T3|T3 category|C0475374|||C0475374|SNOMEDCT|||  
T3|T3 category (finding)|||C0475374|SNOMEDCT|||  
T3|T3 preparation|C0041014|||C0041014|SNOMEDCT|||  
T3|T3 stage|C0475374|||C0475374|SNOMEDCT|||  
T3|T3 stage (finding)|C0475374|||C0475374|SNOMEDCT|||  
T3|T3 stage (tumor staging)|||C0475374|SNOMEDCT|||  
T3|T3 thoracic segmental innervation|C1235740|||C1235740|MTH|||  
T3|T<sub>3</sub>|||C0041014|SNOMEDCT|||  
T3|T<sub>3</sub> preparation|||C0041014|SNOMEDCT|||  
T3|T>3|C0041014|||C0041014|SNOMEDCT|||  
T3|T>3 preparation|||C0041014|SNOMEDCT|||

T3|Therapeutic T3|C0041014|||C0041014|NCI;PDQ|||  
T3|Thyroid Hormone, T3|C0041014|||C0041014|MSH|||  
T3|Thyroid hormone|C0040135|||1|0.4543|  
T3|Total T3|C0428419|||C0428419|NCI|||  
T3|Total Triiodothyronine|C0041014;C0428419|||C0428419|NCI|||  
T3|Total triiodothyronine|C0041014;C0428419|||C0041014|SNOMEDCT|||  
T3|Tri-iodothyronine product|C0041014|||C0041014|SNOMEDCT|||  
T3|Triiodothyronine|C0041014;C0428419|||C0041014;C0428419|LCH;LNC;MSH;MTH;NCI;ND  
FRT;PDQ;RXNORM;SNOMEDCT|||  
T3|Triiodothyronine (substance)|||C0041014|SNOMEDCT|||  
T3|Triiodothyronine Measurement|C0428419|||C0428419|NCI|||  
T3|Triiodothyronine [Chemical/Ingredient]|||C0041014|NDFRT|||  
T3|Triiodothyronine level|C0428419|||C0428419|SNOMEDCT|||  
T3|Triiodothyronine measurement|C0428419|||C0428419|MTH;SNOMEDCT|||  
T3|Triiodothyronine measurement (procedure)|||C0428419|SNOMEDCT|||  
T3|Triiodothyronine preparation|C0041014|||C0041014|SNOMEDCT|||  
T3|Triiodothyronine preparation (product)|||C0041014|SNOMEDCT|||  
T3|Triiodothyronine preparation (substance)|||C0041014|SNOMEDCT|||  
T3|Tumor Stage T3|C0475374|||C0475374|NCI|||  
T3|Tumor stage T3|C0475374|||C0475374|MTH;SNOMEDCT|||  
T3|Tumour stage T3|C0475374|||C0475374|SNOMEDCT|||  
T3|Tylenol with codeine|C0724034|||1|  
T3|Type 3|C0441731|||1|0.0155|  
T3|[125I]triiodothyronine|||1|0.0155|  
T3|advanced|C0205179|||1|0.0127|  
T3|after|C0231290;C0687676|||1|0.0253|  
T3|hours|C0439227|||1|0.0169|  
T3|l-Triiodothyronine|C0041014;C2936843|||C2936843|NDFRT|||  
T3|l-Triiodothyronine (T3)|||C2936843|NDFRT|||  
T3|l-Triiodothyronine [EPC]|C2936843|||C2936843|MTH;NDFRT|||  
T3|l-Triiodothyronine-containing Agent|C2936843|||C2936843|NDFRT|||  
T3|later|||1|0.0155|  
T3|liothyronine|C0041014|||C0041014|CHV|||  
T3|period|C0439531;C1948053|||1|0.0155|  
T3|solute carrier family 25 (mitochondrial carrier; adenine nucleotide  
translocator), member 5|||C1335834|HUGO|||  
T3|stage t3|C0475374|||C0475374|CHV|||  
T3|t3|||C0041014|CHV|||  
T3|t3 stage|C0475374|||C0475374|CHV|||  
T3|t3 thyroid hormone|C0041014|||C0041014|CHV|||  
T3|term 3||1|0.004|||  
T3|therapeutic triiodothyronine|C0041014|||C0041014|PDQ|||  
T3|third thoracic vertebra|C0459952|||C0459952|FMA;SNOMEDCT;UWDA|||  
T3|third thoracic vertebra nerves|C1235740|||C1235740|CHV|||  
T3|thoracic (level) 3||1|0.130|||  
T3|thyroid hormone 3,3',5-triiodo-L-thyronine|||1|0.0098|  
T3|total T3|C0428419|||1|0.0084|  
T3|transurethral thermoablation therapy|||1|  
T3|treatment|C0039798;C0087111;C1522326;C1533734;C1705169;C3161471|||1|0.0183|  
T3|triiodothyronine|||1|0.0267|  
T3|triiodothyronin|C0041014;C0428419|||1|0.0183|  
T3|triiodothyronine|C0041014;C0428419|1|0.536|C0041014;C0428419|AOD;CHV;CSP;LCH;  
LNC;MSH;MTH;NCI;NDFRT;PDQ;RXNORM;SNOMEDCT|||  
T3|triiodothyroxine|||1|0.0197|  
T3|triiodothyronine|||1|0.0183|  
T3|tumor stage 3||1|0.312|||  
T3|type 3|C0441731|||C0441731|CHV;SNOMEDCT|||

T3|weeks|C0439230|||||1|0.0155|  
T3|years|C0439234|||||1|0.0155|  
T4|3,5,3',5'-Tetraiodothyronine||||C0040165|MSH;NDFRT|||  
T4|3,5,3'5' Tetraiodothyronine||||C0040165|SNOMEDCT|||  
T4|L Thyroxine|C0040165;C1881373;C2936885|||C0040165|MSH|||  
T4|L-3,5,3',5'-Tetraiodothyronine||||C0040165|MSH;NDFRT|||  
T4|L-3,5,5'-tetraiodothyronine||||C0040165|NCI|||  
T4|L-Thyroxine|C0040165;C1881373;C2936885|||C0040165|MSH;NDFRT|||  
T4|LEVOTHYROXINE|C0040165;C1881373|||C0040165|MTHSPL;NDFRT;VANDF|||  
T4|Levothyroxine|C0040165;C1881373|||C0040165|MSH;NDFRT;USPMG|||  
T4|O-(4-Hydroxy-3,5-diiodophenyl) 3,5-diiodo-L-tyrosine||||C0040165|MSH;NDFRT|||  
T4|O-(4-Hydroxy-3,5-diiodophenyl)-3,5-diiodotyrosine||||C0040165|MSH;NDFRT|||  
T4|T AAB THYROID HORMONE 004||||C0040165|MSH|||  
T4|T helper|||||1|0.0155|  
T4|T helper cells|C0018894|||||1|0.0086|  
T4|T4||||C0040165;C0475751;C1235738;C1281902;C2936885|CHV;CSP;FMA;NCI;NDFRT;PDQ;SNOMEDCT;UWDA|||  
T4|T4 - Thyroxine|C0040165|||C0040165|SNOMEDCT|||  
T4|T4 Cancer Stage Finding|C0475751|||C0475751|NCI|||  
T4|T4 Primary Tumor Finding|C0475751|||C0475751|NCI|||  
T4|T4 Primary Tumor Stage Finding|C0475751|||C0475751|NCI|||  
T4|T4 Stage|C0475751|||C0475751|NCI|||  
T4|T4 Stage Finding|C0475751|||C0475751|NCI|||  
T4|T4 TNM Finding|C0475751|||C0475751|NCI|||  
T4|T4 Thyroid Hormone|C0040165|||C0040165|MSH;NDFRT|||  
T4|T4 Tumor Finding|C0475751|||C0475751|NCI|||  
T4|T4 Tumor Stage|C0475751|||C0475751|NCI|||  
T4|T4 category|C0475751|||C0475751|SNOMEDCT|||  
T4|T4 category (finding)|||C0475751|SNOMEDCT|||  
T4|T4 preparation|C0040165|||C0040165|SNOMEDCT|||  
T4|T4 stage|C0475751|||C0475751|SNOMEDCT|||  
T4|T4 stage (finding)|C0475751|||C0475751|SNOMEDCT|||  
T4|T4 stage (tumor staging)|||C0475751|SNOMEDCT|||  
T4|T4 thoracic segmental innervation|C1235738|||C1235738|MTH|||  
T4|T<sub>4</sub>||||C0040165|SNOMEDCT|||  
T4|T<sub>4</sub> preparation||||C0040165|SNOMEDCT|||  
T4|T>4<||||C0040165|SNOMEDCT|||  
T4|T>4< preparation||||C0040165|SNOMEDCT|||  
T4|THROXINE L||||C0040165|MSH|||  
T4|TT4 - Total thyroxine|C0040165|||C0040165|SNOMEDCT|||  
T4|Tetraiodothyronine preparation|C0040165|||C0040165|SNOMEDCT|||  
T4|Tetraiodothyronine preparation (product)|||C0040165|SNOMEDCT|||  
T4|Tetraiodothyronine preparation (substance)|||C0040165|SNOMEDCT|||  
T4|Thyroid Hormone, T4|C0040165|||C0040165|MSH|||  
T4|Thyroxin|C0040165;C1281902|||C0040165|MSH;NDFRT|||  
T4|Thyroxine|C0040165;C1281902|||C0040165;C1281902|LCH;LNC;MSH;MTH;NCI;NDFRT;RXNORM;SNOMEDCT|||  
T4|Thyroxine (substance)|||C0040165|SNOMEDCT|||  
T4|Thyroxine [Chemical/Ingredient]||||C0040165|NDFRT|||  
T4|Thyroxine preparation|C0040165|||C0040165|SNOMEDCT|||  
T4|Thyroxine product|C0040165|||C0040165|SNOMEDCT|||  
T4|Total T4|C1281902|||C1281902|NCI|||  
T4|Total Thyroxine Measurement|C1281902|||C1281902|MTH;NCI|||  
T4|Total thyroxine|C0040165|||C0040165|SNOMEDCT|||  
T4|Total thyroxine level|C1281902|||C1281902|SNOMEDCT|||  
T4|Total thyroxine measurement|C1281902|||C1281902|SNOMEDCT|||  
T4|Total thyroxine measurement (procedure)|||C1281902|SNOMEDCT|||

T4|Tumor Stage T4|C0475751|||C0475751|NCI|||  
T4|Tumor stage T4|C0475751|||C0475751|MTH;SNOMEDCT|||  
T4|Tumour stage T4|C0475751|||C0475751|SNOMEDCT|||  
T4|Tyrosine, O-(4-hydroxy-3,5-diiiodophenyl)-3,5-diiiodo-|||C0040165|MSH;NDFRT|||  
T4|fourth thoracic vertebra|C0459951|||C0459951|FMA;SNOMEDCT;UWDA|||  
T4|fourth thoracic vertebra nerves|C1235738|||C1235738|CHV|||  
T4|helper/inducer|||1|0.0276|  
T4|invasion|C1269955;C2699153|||1|0.0172|  
T4|l thyroxine|C0040165;C1881373;C2936885|||C0040165|CHV|||  
T4|l-Thyroxine|C0040165;C1881373;C2936885|||C2936885|NDFRT|||  
T4|l-Thyroxine (T4)|||C2936885|NDFRT|||  
T4|l-Thyroxine [EPC]|C2936885|||C2936885|MTH;NDFRT|||  
T4|l-Thyroxine-containing Agent|C2936885|||C2936885|NDFRT|||  
T4|l-thyroxine|C0040165;C1881373;C2936885|||C0040165|CHV|||  
T4|later|||1|0.0155|  
T4|levothyroxine|C0040165;C1881373|||C0040165|CHV;PDQ|1|0.0259|  
T4|locally advanced|||1|0.0241|  
T4|months|C0439231|||1|0.019|  
T4|serum thyroxine|C0036833|||1|0.7879|  
T4|thoracic (level) 4||1|0.082|||  
T4|thyroid hormone|C0040135|||1|0.0259|  
T4|thyroxin|C0040165;C1281902|||C0040165|NCI|||  
T4|thyroxine|C0040165;C1281902|1|0.848|C0040165;C1281902|AOD;CHV;CSP;LCH;LNC;MSH  
;MTH;NCI;NDFRT;PDQ;RXNORM;SNOMEDCT|||  
T4|thyroxine (T4)|||C0040165|CHV|||  
T4|thyroxine level|C0202231;C0428416|||1|0.0103|  
T4|tripchlorolide|C0146876|||1|0.0224|  
T4|tumor stage 4||1|0.070|||  
T8|T8|C1179692|||C1179692|FMA;UWDA|||  
T8|T8 innervation|C1179692|||C1179692|MTH|||  
T8|eighth thoracic (t8) nerve|||C1179692|CHV|||  
T8|eighth thoracic vertebra|C0459953|||C0459953|FMA;SNOMEDCT;UWDA|||  
T8|thoracic (level) 8||1|1.000|||  
T9|CD71|||C1619635|LNC;NCI|||  
T9|CD71 Antigen|C1619635|||C1619635|NCI|||  
T9|CD71 antigen|C1619635|||C1619635|MSH;MTH|||  
T9|Lymphocyte antigen CD71|C1619635|||C1619635|SNOMEDCT|||  
T9|Lymphocyte antigen CD71 (substance)|||C1619635|SNOMEDCT|||  
T9|MESOTRYPSIN|C1418972|||C1418972|OMIM|||  
T9|MESOTRYPSINOGEN|C1418972|||C1418972|OMIM|||  
T9|PROTEASE, SERINE, 3|C1418972|||C1418972|OMIM|||  
T9|PRSS3|C1418972|||C1418972|HUGO;OMIM|||  
T9|PRSS3 gene|C1418972|||C1418972|HUGO;MTH|||  
T9|T9|C1179693;C1418972;C1619635|||C1179693;C1418972;C1619635|FMA;NCI;OMIM;UWDA|  
||  
T9|T9 innervation|C1179693|||C1179693|MTH|||  
T9|TFR|||C1619635|NCI|||  
T9|TFR1|C1420708;C1619635|||C1619635|NCI|||  
T9|TFR3|C1420708;C1619635;C1705610|||C1619635|NCI|||  
T9|TR|||C1619635|NCI|||  
T9|TRFR|C1420708;C1619635;C1705610|||C1619635|NCI|||  
T9|TRY3|C1418972|||C1418972|HUGO;OMIM|||  
T9|TRY4|C1418972;C3150814|||C1418972|HUGO|||  
T9|TRYPSINOGEN 3|C1418972|||C1418972|OMIM|||  
T9|Transferrin Receptor|C0034845;C1420708;C1619635|||C1619635|NCI|||  
T9|Transferrin Receptor 1|C1420708;C1619635|||C1619635|NCI|||  
T9|Transferrin Receptor Protein 1|C1619635|||C1619635|NCI|||

T9|mesotrypsin|C1418972|||C1418972|HUGO|||  
T9|ninth thoracic (t9) nerve|||C1179693|CHV|||  
T9|ninth thoracic vertebra|C0459954|||C0459954|FMA;SNOMEDCT;UWDA|||  
T9|p90|C1413107;C1537472;C1619635|||C1619635|NCI|||  
T9|protease, serine, 3|C1418972|||C1418972|HUGO|||  
T9|thoracic|||1|1|  
T9|thoracic (level) 9||1|1.000|||  
T10|ADP-Ribosyl Cyclase 1|C1413221;C2827388|||C2827388|MTH;NCI|||  
T10|CD38|||C2827388|NCI|||  
T10|CD38 Antigen|C0075742;C1413221;C2827388|||C2827388|NCI|||  
T10|CD38 Antigen (p45) Gene|||C2827387|NCI|||  
T10|CD38 Molecule wt Allele|C2827387|||C2827387|NCI|||  
T10|CD38 wt Allele|C2827387|||C2827387|MTH;NCI|||  
T10|Cyclic ADP-Ribose Hydrolase 1|C2827388|||C2827388|NCI|||  
T10|EC3.2.2.5|C2827388|||C2827388|NCI|||  
T10|T10|C1179694;C2827387;C2827388|||C1179694;C2827387;C2827388|FMA;NCI;UWDA|||  
T10|T10 - Thoracic segmental innervation|C1179694|||C1179694|MTH|||  
T10|cADPr Hydrolase 1|C2827388|||C2827388|NCI|||  
T10|t10|C1179694;C2827387;C2827388|||C1179694|CHV|||  
T10|tenth thoracic (T10) nerve|||C1179694|CHV|||  
T10|tenth thoracic vertebra|C0459955|||C0459955|FMA;SNOMEDCT;UWDA|||  
T10|thoracic (level) 10||1|1.000|||  
T11|CD2|C1367475;C2347546|||C1367475|HUGO;NCI;OMIM|||  
T11|CD2 Antigen (p50), Sheep Red Blood Cell Receptor Gene|||C1367475|NCI|||  
T11|CD2 Antigen (p50), Sheep Red Blood Cell Receptor wt Allele|||C1705087|NCI|||  
T11|CD2 Gene|C1367475|||C1367475|NCI|||  
T11|CD2 gene|C1367475|||C1367475|HUGO;MTH|||  
T11|CD2 molecule|C0108773;C1367475|||C1367475|HUGO|||  
T11|CD2 wt Allele|C1705087|||C1705087|MTH;NCI|||  
T11|SHEEP ERYTHROCYTE RECEPTOR|C1367475|||C1367475|OMIM|||  
T11|SRBC|C1367475;C1418917;C1705087|||C1367475;C1705087|NCI;OMIM|||  
T11|T-LYMPHOCYTE SURFACE CD2 ANTIGEN|C1367475|||C1367475|OMIM|||  
T11|T11|C1179695;C1367475;C1705087|||C1179695;C1367475;C1705087|FMA;NCI;OMIM;UWDA|||  
T11|T11 innervation|C1179695|||C1179695|MTH|||  
T11|eleventh thoracic (T11) nerve|||C1179695|CHV|||  
T11|eleventh thoracic vertebra|C0459956|||C0459956|FMA;SNOMEDCT;UWDA|||  
T11|thoracic (level) 11||1|1.000|||  
T12|12 months|||1|1|  
T12|CD 6 antigen|C0054967|||C0054967|MSH|||  
T12|CD6|||C0054967|CSP;LNC|||  
T12|CD6 - Cluster of differentiation antigen 6|C0054967|||C0054967|SNOMEDCT|||  
T12|CD6 Antigen|C0054967;C1413232|||C0054967|NCI|||  
T12|CD6 antigen|C0054967;C1413232|||C0054967|MSH;MTH|||  
T12|Cluster of differentiation antigen 6|C0054967|||C0054967|SNOMEDCT|||  
T12|Lymphocyte antigen CD6|C0054967|||C0054967|SNOMEDCT|||  
T12|Lymphocyte antigen CD6 (substance)|||C0054967|SNOMEDCT|||  
T12|Message structure -T12|C1549876|||C1549876|MTH|||  
T12|T-Cell Differentiation Antigen CD6|C0054967;C1413232|||C0054967|NCI|||  
T12|T-cell lineage 12|C0054967|||C0054967|SNOMEDCT|||  
T12|T12|C0054967;C1179696;C1549876|||C0054967;C1179696;C1549876|FMA;HL7V2.5;NCI;UWDA|||  
T12|T12 - T-cell lineage 12|C0054967|||C0054967|SNOMEDCT|||  
T12|T12 Thoracic segmental innervation|C1179696|||C1179696|MTH|||  
T12|TP120|C0054967;C1413232;C2347264|||C0054967|NCI|||  
T12|thoracic (level) 12||1|1.000|||

T12|transkarbam 12|C1505043|||C1505043|MSH|||  
T12|twelfth thoracic (T12) nerve|||C1179696|CHV|||  
T12|twelfth thoracic vertebra|C0459957|||C0459957|FMA;SNOMEDCT;UWDA|||  
TAH|Abdominal panhysterectomy|C0404079|||C0404079|SNOMEDCT|||  
TAH|Bonney operation hysterectomy|C0404079|||C0404079|SNOMEDCT|||  
TAH|Richardson operation hysterectomy|C0404079|||C0404079|SNOMEDCT|||  
TAH|TAH - Total abdominal hysterectomy|C0404079|||C0404079|SNOMEDCT|||  
TAH|Total Abdominal Hysterectomy|C0404079|||C0404079|NCI|||  
TAH|Total abdominal hysterectomy|C0404079|||C0404079|CCS;ICD9CM;MTH;SNOMEDCT|||  
TAH|Total abdominal hysterectomy (procedure)|||C0404079|SNOMEDCT|||  
TAH|Total abdominal hysterectomy, NOS|C0404079|||C0404079|SNOMEDCT|||  
TAH|Total hysterectomy without removal of tube or ovary|||C0404079|SNOMEDCT|||  
TAH|abdominal hysterectomy total|C0404079|||C0404079|CHV|||  
TAH|abdominal hysterectomys total|||C0404079|CHV|||  
TAH|tah|C0404079|||C0404079|CHV|||  
TAH|total abdominal  
hysterectomy|C0404079|1|1.000|C0404079|CCS;CHV;ICD9CM;MTH;NCI;SNOMEDCT|1|0.2578|  
1  
TAH|total artificial heart|C0182433|||C0182433|CHV;CSP|1|0.7422|1  
TBI|BRAIN INJ TRAUMATIC|||C0876926|MSH|||  
TBI|Brain Injuries, Traumatic|C0876926|||C0876926|MSH|||  
TBI|Brain Injury, Traumatic|C0876926|||C0876926|MSH|||  
TBI|Brain Trauma|C0876926|||C0876926|MSH|||  
TBI|Brain Traumas|C0876926|||C0876926|MSH|||  
TBI|Brain damage - traumatic|||C0876926|SNOMEDCT|||  
TBI|Brain damage - traumatic (disorder)|||C0876926|SNOMEDCT|||  
TBI|ENCEPH TRAUMATIC|||C0876926|MSH|||  
TBI|Encephalopathies, Traumatic|C0876926|||C0876926|MSH|||  
TBI|Encephalopathy, Traumatic|C0236959;C0876926|||C0876926|MSH|||  
TBI|INJ BRAIN TRAUMATIC|||C0876926|MSH|||  
TBI|Injuries, Traumatic Brain|C0876926|||C0876926|MSH|||  
TBI|Injury, Brain, Traumatic|C0876926|||C0876926|MSH|||  
TBI|Injury, Traumatic Brain|C0876926|||C0876926|MSH|||  
TBI|TBI|C0876926|||C0876926|MEDLINEPLUS|||  
TBI|TBI (Traumatic Brain Injury)|||C0876926|MSH|||  
TBI|TBI (traumatic brain injury)|||C0876926|CSP|||  
TBI|TBIs (Traumatic Brain Injury)|||C0876926|MSH|||  
TBI|TRAUMATIC BRAIN INJ|||C0876926|MSH|||  
TBI|TRAUMATIC ENCEPH|||C0876926|MSH|||  
TBI|TSH binding inhibition|||1|0.002|  
TBI|Trauma, Brain|C0876926|||C0876926|MSH|||  
TBI|Traumas, Brain|C0876926|||C0876926|MSH|||  
TBI|Traumatic Brain Injuries|C0876926|||C0876926|MSH|||  
TBI|Traumatic Brain Injury|C0876926|||C0876926|MEDLINEPLUS;MSH;MTH|||  
TBI|Traumatic Encephalopathies|C0876926|||C0876926|MSH|||  
TBI|Traumatic Encephalopathy|C0236959;C0876926|||C0876926|MSH;NCI|||  
TBI|Traumatic brain injury|C0876926|||C0876926|LNC;SNOMEDCT|1|0.6371|  
TBI|Traumatic brain injury (disorder)|||C0876926|SNOMEDCT|||  
TBI|Traumatic encephalopathy|C0236959;C0876926|||C0876926|SNOMEDCT|||  
TBI|Traumatic encephalopathy (disorder)|||C0876926|SNOMEDCT|||  
TBI|Traumatic encephalopathy (disorder) [Ambiguous]|||C0876926|SNOMEDCT|||  
TBI|brain injured|||1|0.0068|  
TBI|brain injuries traumatic|||C0876926|CHV|||  
TBI|brain injury traumatic|||C0876926|CHV|||  
TBI|brain trauma|C0876926|||C0876926|CHV;CSP|||  
TBI|brain traumas|C0876926|||C0876926|CHV|||  
TBI|thrombotic brain infarction|||1|

TBI|thyroxine-binding index|C1441288|||||1  
TBI|tick-borne illness|||||1  
TBI|toe-brachial index|C2116889|||C2116889|MSH||  
TBI|tooth-brushing instruction|||||1  
TBI|total body  
irradiation|C0043162|1|0.958|C0043162|CHV;MSH;NCI;SNOMEDCT|1|0.3469|1  
TBI|tracheobronchial injury|||||1  
TBI|traumatic brain damage|C0876926|||C0876926|CHV||  
TBI|traumatic brain injuries|C0876926|||C0876926|CHV||  
TBI|traumatic brain  
injury|C0876926|1|0.042|C0876926|CHV;LNC;MEDLINEPLUS;MSH;MTH;SNOMEDCT|||1  
TBI|traumatic brain-injured|||||1|0.0034|  
TBI|traumatic encephalopathy|C0236959;C0876926|||C0876926|CHV||  
TBI|traumatically brain-injured|||||1|0.0037|  
TBI|tumor burden index|||||1  
TB|1,2,3-Propanetriyl Butanoate|||C0077025|NCI;PDQ||  
TB|1,2,3-Tributyrylglycerol|||C0077025|NCI;PDQ||  
TB|Butanoic Acid 1,2,3-Propanetriyl Ester|||C0077025|NCI;PDQ||  
TB|Butanoic Acid, 1,2,3-Propanetriyl Ester|||C0077025|NCI||  
TB|Butyryl Triglyceride|C0077025|||C0077025|NCI;PDQ||  
TB|Disease, Koch's|C0041296|||C0041296|MSH||  
TB|Disease, Kochs|C0041296|||C0041296|MSH||  
TB|Glyceryl Tributyrate|C0077025|||C0077025|NCI;PDQ||  
TB|Glyceryl tributyrate|C0077025|||C0077025|NCI||  
TB|INFECTION TBC|C0041296|||C0041296|CST||  
TB|INFECTION TUBERCULOSIS|C0041296|||C0041296|CST||  
TB|Infection due to Mycobacterium tuberculosis|C0041296|||C0041296|SNOMEDCT||  
TB|Infection due to Mycobacterium tuberculosis  
(disorder)|||C0041296|SNOMEDCT||  
TB|Koch Disease|C0041296|||C0041296|MSH||  
TB|Koch's Disease|C0041296|||C0041296|MSH;NDFRT||  
TB|Kochs Disease|C0041296|||C0041296|MSH;NDFRT||  
TB|MTB - Mycobacterium tuberculosis infection|||C0041296|SNOMEDCT||  
TB|Mycobacterium tuberculosis infection|||C0041296|SNOMEDCT||  
TB|TB|||C0041296;C0077025;C0332289;C1704474|CHV;MEDLINEPLUS;NCI;PDQ;SNOMEDCT||  
TB|TB - Tuberculosis|C0041296|||C0041296|SNOMEDCT||  
TB|TBC|||C0041296|CHV||  
TB|TRIBUTYRIN|C0077025|||C0077025|NCI||  
TB|TUBE|C0175730;C1547937;C1561954;C1704730;C1704731|||C1704474|NCI||  
TB|TUBERCULOSIS|C0041296|||C0041296|COSTAR;DXP;ICD9CM||  
TB|Tapes for the Blind|||||1  
TB|Thoroughbred|||||1|0.0041|  
TB|Transmitted by|C0332289|||C0332289|MTH;SNOMEDCT||  
TB|Transmitted by (attribute)|||C0332289|SNOMEDCT||  
TB|Tributyryn|C0077025|||C0077025|NCI||  
TB|Tris-borate|||||1|0.0024|  
TB|Trypanosoma brucei|C0041217|||||1|0.0022|  
TB|Tube|C0175730;C1547937;C1561954;C1704730;C1704731|||C1704474|NCI;SNOMEDCT||  
TB|Tube (qualifier value)|||C1704474|SNOMEDCT||  
TB|Tube - unit dose|C1704474|||C1704474|MTH||  
TB|Tube - unit of product usage|C1704474|||C1704474|SNOMEDCT||  
TB|Tube - unit of product usage (qualifier value)|||C1704474|SNOMEDCT||  
TB|Tube Dosing Unit|C1704474|||C1704474|NCI||  
TB|Tuberculoses|C0041296|||C0041296|MSH||  
TB|Tuberculosis|C0041296|||C0041296|CCS;LCH;LNC;MEDLINEPLUS;MSH;MTH;NCI;NDFRT;SN  
OMEDCT||  
TB|Tuberculosis (disorder)|||C0041296|SNOMEDCT||

TB|Tuberculosis NOS|C0041296|||C0041296|SNOMEDCT|||  
TB|Tuberculosis NOS (disorder)|||C0041296|SNOMEDCT|||  
TB|Tuberculosis [Disease/Finding]|||C0041296|NDFRT|||  
TB|Tuberculosis, NOS|C0041296|||C0041296|SNOMEDCT|||  
TB|Tuberculous|C0041296|||C0041296|SNOMEDCT|||  
TB|Tuberculous (disorder)|||C0041296|SNOMEDCT|||  
TB|Tuberculous (qualifier value)|||C0041296|SNOMEDCT|||  
TB|Tubes|C0175730;C1547937;C1704474|||C1704474|SNOMEDCT|||  
TB|anti-tuberculosis|||1|0.0032|  
TB|biologic half-life|||1|  
TB|body temperature|C0005903|||1|0.0829|  
TB|butanoic acid, 1,2,3- propanetriyl ester|||C0077025|MSH|||  
TB|glyceryl tributyrate|C0077025|||C0077025|MSH|||  
TB|infection tuberculosis|C0041296|||C0041296|CHV|||  
TB|terbium|C0039541|||1|0.0034|  
TB|term birth|C0233324|||1|  
TB|terminal bronchiole|C0225666;C1269572;C1280599|||1|  
TB|terrible burning|||1|  
TB|testosterone buciclate|C0164583|||1|0.0022|  
TB|theobromine|C0039763|||1|0.0071|  
TB|thiabendazole|C0039832|||1|0.0022|  
TB|thiobenzamide|C0076443|||1|0.0029|  
TB|thought broadcasting|C0233688|||1|  
TB|thromboxane B|||1|  
TB|thymol blue|C0076605|||1|  
TB|tissue basophils|C0024880|||1|0.0022|  
TB|tolbutamide|C0040374|||1|0.0029|  
TB|toluidine blue|C0040380|||1|0.009|1|  
TB|toothbrush|C0040461;C0183975|||1|  
TB|total base|||1|  
TB|total bilirubin|C0005437;C0201913;C0368753|||1|0.008|  
TB|total body|C0229960|||1|0.0115|1|  
TB|total bound|||1|  
TB|tracheal bronchial|||1|  
TB|tracheobronchial|C0450123|||1|0.0056|  
TB|tracheobronchitis|C0040586|||1|  
TB|transmit|C0332289|||C0332289|CHV|||  
TB|transmits|C0332289|||C0332289|CHV|||  
TB|transmitted|C0242781;C0332289;C1521797|||C0332289|CHV|||  
TB|transmitted by|C0332289|||C0332289|CHV|||  
TB|transmitting|C0332289|||C0332289|CHV|||  
TB|trapezoid body|C0152379;C1289448|||1|0.0032|1|  
TB|tributyrin|C0077025|||C0077025|MSH;MTH;NCI;PDQ|1|0.0022|  
TB|tributyrylglycerol|C0077025|||C0077025|MSH|||  
TB|triceps brachii|C0559502;C1279040|||1|0.0102|  
TB|trypan blue|C0041213|||1|0.0112|  
TB|tub bath|||1|  
TB|tubercle bacillus|||1|  
TB|tuberculin|C0034131;C0041289;C1532464|||C0034131;C0041289;C1532464|CHV;LCH;LNC;MSH;MTH;NCI;NDFRT;RXNORM;SNOMEDCT|||1|  
TB|tuberculosis|C0041296|1|1.000|C0041296|AOD;CCS;CHV;COSTAR;CSP;DXP;ICD9CM;LCH;LNC;MEDLINEPLUS;MSH;MTH;NCI;NDFRT;SNOMEDCT|1|0.7942|1|  
TB|tuberculosis (TB)|C0041296|||C0041296|CHV|||  
TB|tuberculosis infection|C0041296|||C0041296|CHV|||  
TB|tuberculous|C0041296|||C0041296|CHV|1|0.0088|  
TB|tumor bearing|||1|  
TB|tumor-bearing|||1|0.0183|

TEDS|thromboembolic disease stockings||1|1.000|||||1  
TEDS|transesophageal echo-Doppler system|||||||1  
TEDS|treatment episode data set|||||||1  
TEE|ECHOCARDIOGR TRANSESOPHAGEAL|||C0206054|MSH||  
TEE|Echocardiography, Transesophageal|C0206054||C0206054|MSH;MTH||  
TEE|TEE|C1710361||C0206054;C1710361|MSH;NCI||  
TEE|TEE procedure|C0206054||C0206054|SNOMEDCT||  
TEE|TOE - Transesophageal echocardiography|C0206054||C0206054|SNOMEDCT||  
TEE|TOE - Transoesophageal echocardiography|C0206054||C0206054|SNOMEDCT||  
TEE|Tee Device Component|C1710361||C1710361|MTH;NCI||  
TEE|Transesophageal Echocardiography|C0206054||C0206054|MSH;NCI||  
TEE|Transesophageal echocardiogram|C0206054||C0206054|SNOMEDCT||  
TEE|Transesophageal echocardiography|C0206054||C0206054|MTHICD9;SNOMEDCT||  
TEE|Transesophageal echocardiography (procedure)|||C0206054|SNOMEDCT||  
TEE|Transesophogea Echocardiogram Device|C1710361||C1710361|NCI||  
TEE|Transoesophageal echocardiogram|C0206054||C0206054|SNOMEDCT||  
TEE|Transoesophageal echocardiography|C0206054||C0206054|SNOMEDCT||  
TEE|Transoesophageal echocardiography (procedure)|||C0206054|SNOMEDCT||  
TEE|echocardiograms transesophageal|||C0206054|CHV||  
TEE|thermal effect of exercise|||||||1  
TEE|total energy expended|||||||1  
TEE|total energy expenditure|C0429629|||1|0.142|  
TEE|transesophageal echocardiogram|C0206054||C0206054|CHV|1|0.0157|1  
TEE|transesophageal echocardiograph||1|1.000|||||1  
TEE|transesophageal echocardiographic|||||1|0.0377|  
TEE|transesophageal  
echocardiography|C0206054||C0206054|CHV;MSH;MTHICD9;NCI;SNOMEDCT|1|0.7964|1  
TEE|transesophageal echography|||||1|0.0082|  
TEE|transnasal endoscopic ethmoidectomy|||||||1  
TEE|tyrosine ethyl ester|||||||1  
TENS|Antibiotic necrolysis|||C0014518|SNOMEDCT||  
TENS|EPIDERMAL NECROLYSIS TOX|||C0014518|MSH||  
TENS|EPIDERMOLYSIS, ACUTE TOXIC|C0014518||C0014518|DXP||  
TENS|Electric Stimulation, Transcutaneous|C0040654||C0040654|MSH||  
TENS|Electrical Stimulation, Transcutaneous|C0040654||C0040654|MSH||  
TENS|Electrostimulation, Transdermal|C0040654||C0040654|MSH||  
TENS|Epidermal Necrolyses, Toxic|C0014518||C0014518|MSH||  
TENS|Epidermal Necrolysis, Toxic|C0014518||C0014518|MSH;NDFRT||  
TENS|Epidermal Necrolysis, Toxic [Disease/Finding]|||C0014518|NDFRT||  
TENS|LYELL SYNDROME|C0014518||C0014518|DXP||  
TENS|LYELL'S SYNDROME|C0014518||C0014518|CST||  
TENS|Leyell's syndrome|||C0014518|SNOMEDCT||  
TENS|Lyell Syndrome|C0014518||C0014518|MSH;NCI||  
TENS|Lyell toxic epidermal necrolysis, subepidermal  
type|C0014518||C0014518|SNOMEDCT||  
TENS|Lyell's Syndrome|C0014518||C0014518|MSH;NDFRT||  
TENS|Lyell's syndrome|C0014518||C0014518|CSP;MTHICD9;SNOMEDCT||  
TENS|Lyell's toxic epidermal necrolysis, subepidermal  
type|C0014518||C0014518|SNOMEDCT||  
TENS|Lyell's toxic epidermal necrolysis, subepidermal type  
(disorder)|||C0014518|SNOMEDCT||  
TENS|Lyells Syndrome|C0014518||C0014518|MSH||  
TENS|NECROLYSIS, TOXIC EPIDERMAL|C0014518||C0014518|DXP||  
TENS|NONSTAPH SCALDED SKIN SYNDROME|||C0014518|MSH||  
TENS|Necrolyses, Toxic Epidermal|C0014518||C0014518|MSH||  
TENS|Necrolysis - toxic|||C0014518|SNOMEDCT||  
TENS|Necrolysis, Toxic Epidermal|C0014518||C0014518|MSH||

TENS|Nerve Stimulation, Transcutaneous|C0040654|||C0040654|MSH|||  
TENS|Nonstaphylococcal Scalded Skin Syndrome|C0014518|||C0014518|MSH;NDFRT|||  
TENS|Percutaneous Electric Nerve Stimulation|C0040654|||C0040654|MSH|||  
TENS|Percutaneous Electrical Nerve Stimulation|C0040654|||C0040654|MSH|||  
TENS|SCALDED SKIN SYNDROME NONSTAPH|||C0014518|MSH|||  
TENS|SYNDROME LYELL'S|||C0014518|CST|||  
TENS|Scalded Skin Syndrome, Nonstaphylococcal|C0014518|||C0014518|MSH;NDFRT|||  
TENS|Stimulation, Transcutaneous Electric|C0040654|||C0040654|MSH|||  
TENS|Stimulation, Transcutaneous Electrical|C0040654|||C0040654|MSH|||  
TENS|Stimulation, Transcutaneous Nerve|C0040654|||C0040654|MSH|||  
TENS|Syndrome, Lyell's|C0014518|||C0014518|MSH|||  
TENS|TCNS - Transcutaneous nerve stimulation|C0040654|||C0040654|SNOMEDCT|||  
TENS|TEN|C0014518;C0205456|||C0014518|NCI|||  
TENS|TEN - Toxic epidermal necrolysis|C0014518|||C0014518|SNOMEDCT|||  
TENS|TENS|||C0014518;C0040654|DXP;MSH;NCI|||  
TENS|TENS - Transcutaneous electrical nerve  
stimulation|C0040654|||C0040654|SNOMEDCT|||  
TENS|TNS - Transcutaneous nerve stimulation|C0040654|||C0040654|SNOMEDCT|||  
TENS|TOX EPIDERMAL NECROLYSIS|||C0014518|MSH|||  
TENS|TOXIC EPIDEONEAL NECROLYSIS|C0014518|||C0014518|CST|||  
TENS|Toxic Epidermal Necrolyses|C0014518|||C0014518|MSH|||  
TENS|Toxic Epidermal Necrolysis|C0014518|||C0014518|COSTAR;MSH;MTH;NCI;NDFRT|||  
TENS|Toxic epidermal necrolysis|C0014518|||C0014518|ICD9CM;LCH;NCI;SNOMEDCT|||  
TENS|Toxic epidrml necrolysis|||C0014518|ICD9CM|||  
TENS|Toxic necrolysis|||C0014518|SNOMEDCT|||  
TENS|Transcutaneous Electric Nerve Stimulation|C0040654|||C0040654|MSH;MTH|||  
TENS|Transcutaneous Electric Stimulation|C0040654|||C0040654|MSH|||  
TENS|Transcutaneous Electrical Nerve Stimulation|C0040654|||C0040654|MSH;NCI|||  
TENS|Transcutaneous Electrical Nerve Stimulation  
(TENS)|C0040654|||C0040654|SNOMEDCT|||  
TENS|Transcutaneous Electrical Stimulation|C0040654|||C0040654|MSH|||  
TENS|Transcutaneous Nerve Stimulation|C0040654|||C0040654|MSH|||  
TENS|Transcutaneous electrical nerve stimulation|C0040654|||C0040654|SNOMEDCT|||  
TENS|Transcutaneous electrical nerve stimulation  
(procedure)|||C0040654|SNOMEDCT|||  
TENS|Transcutaneous electrical nerve stimulation  
(regime/therapy)|||C0040654|SNOMEDCT|||  
TENS|Transcutaneous electrical neural stimulation|C0040654|||C0040654|LNC|||  
TENS|Transcutaneous nerve stimulation therapy|C0040654|||C0040654|SNOMEDCT|||  
TENS|Transdermal Electrostimulation|C0040654|||C0040654|MSH|||  
TENS|lyell|C0014518|||C0014518|CHV|||  
TENS|lyell syndrome|C0014518|||C0014518|CHV|||  
TENS|lyell's syndrome|C0014518|||C0014518|CHV|||  
TENS|lyells|C0014518|||C0014518|CHV|||  
TENS|lyells syndrome|C0014518|||C0014518|CHV|||  
TENS|tens|||C0040654|CHV|||  
TENS|toxic epidermal necrolyses|C0014518|||C0014518|CHV|||  
TENS|toxic epidermal necrolysis|C0014518|||C0014518|CHV|||  
TENS|transcutaneous electric nerve  
stimulation|C0040654|||C0040654|MSH;MTH;NCI|||  
TENS|transcutaneous electrical nerve  
stimulation|C0040654|||C0040654|MSH;NCI;SNOMEDCT|1|1|  
TENS|transcutaneous electrical nerve stimulation  
(TENS)|C0040654|||C0040654|CHV|||  
TENS|transcutaneous electrical nerve stimulator|C0491576|||C0491576|SNOMEDCT|||  
TENS|transcutaneous electrical neuromuscular stimulation|||1|1|  
TENS|transcutaneous electrical neuromuscular stimulator||1|1.000|||1|1|

TENS|transcutaneous nerve stimulation|C0040654|||C0040654|CHV|||  
TENS|transdermal electrostimulation|C0040654|||C0040654|CHV|||  
THC|(-)-.DELTA.9-Tetrahydrocannabinol|C0039663|||C0039663|NCI|||  
THC|6H-Dibenzo(b,d)pyran-1-ol, 6a,7,8,10a-tetrahydro-6,6,9-trimethyl-3-pentyl-,  
(6aR-trans)-|||C0039663|MSH;NDFRT|||  
THC|9 ene Tetrahydrocannabinol|C0039663|||C0039663|MSH|||  
THC|9-ene-Tetrahydrocannabinol|C0039663|||C0039663|MSH;NDFRT|||  
THC|DELTA THC 09|||C0039663|MSH|||  
THC|DRONABINOL|C0039663|||C0039663|MTHSPL;NCI;NDFRT;VANDF|||  
THC|Delta 9-Tetrahydrocannabinol|C0039663|||C0039663|NCI|||  
THC|Dronabinol|C0039663|||C0039663|MSH;MTHSPL;NCI;NDFRT;SNOMEDCT;USPMG|||  
THC|Dronabinol (product)|||C0039663|SNOMEDCT|||  
THC|Dronabinol (substance)|||C0039663|SNOMEDCT|||  
THC|IMD2|C0043194;C0258432;C1705616|||C1705616|NCI|||  
THC|Synthetic delta-9-Tetrahydrocannabinol|C0039663|||C0039663|SNOMEDCT|||  
THC|THC|C0039663;C1705616;C1839163|||C0039663;C1705616;C1839163|AOD;CHV;CSP;MSH;  
NCI;NDFRT;OMIM;PDQ|||  
THC|THC1|C1839163|||C1839163|OMIM|||  
THC|THROMBOCYTOPENIA 1|C1839163|||C1839163|OMIM|||  
THC|THROMBOCYTOPENIA 1 (disorder)|C1839163|||C1839163|MTH|||  
THC|THROMBOCYTOPENIA, X-LINKED|C1839163|||C1839163|OMIM|||  
THC|THROMBOCYTOPENIA, X-LINKED, 1|C1839163;C2678137|||C1839163|OMIM|||  
THC|Tetrahydrocannabinol|C0039663|||C0039663|LCH;LNC;MSH;MTH;NCI;NDFRT;RXNORM;SN  
OMEDCT|||  
THC|Tetrahydrocannabinol (substance)|||C0039663|SNOMEDCT|||  
THC|Tetrahydrocannabinol [Chemical/Ingredient]|||C0039663|NDFRT|||  
THC|WAS wt Allele|C1705616|||C1705616|MTH;NCI|||  
THC|WASP|C0043041|||C1705616|NCI|||  
THC|Wiskott-Aldrich Syndrome (Eczema-Thrombocytopenia) wt  
Allele|||C1705616|NCI|||  
THC|Wiskott-Aldrich syndrome Gene|C1705616|||C1705616|NCI|||  
THC|XLT|C1839163|||C1839163|OMIM|||  
THC|delta 1-tetrahydrocannabinol|||1|0.0102|  
THC|delta 9-tetrahydrocannabinol|C0039663|||C0039663|PDQ|1|0.6655|  
THC|delta(1)-THC|||C0039663|MSH;NDFRT|||  
THC|delta(1)-Tetrahydrocannabinol|||C0039663|MSH;NDFRT|||  
THC|delta(9)-THC|||C0039663|MSH;NDFRT|||  
THC|delta(9)-Tetrahydrocannabinol|C0039663|||C0039663|MSH;NDFRT|||  
THC|delta-9-Tetrahydrocannabinol|C0039663|||C0039663|SNOMEDCT|||  
THC|delta-9-Tetrahydrocannabinol (substance)|||C0039663|SNOMEDCT|||  
THC|delta-9-tetrahydrocannabinol|C0039663|||C0039663|AOD;CHV;PDQ|||  
THC|delta9-tetrahydrocannabinol|||1|0.1576|  
THC|dronabinol|C0039663|||C0039663|CHV;MTHSPL;NCI;PDQ|||  
THC|tetrahydrocannabinol|C0039663|1|1.000|C0039663|AOD;CHV;CSP;LCH;LNC;MSH;MTH;N  
CI;NDFRT;PDQ;RXNORM;SNOMEDCT|1|0.1247|1  
THC|tetrahydrocannabinol (THC)|C0039663|||C0039663|CHV|||  
THC|tetrahydrocortisol|C0039664|||1|1  
THC|tetrahydrocortisone|C0039665|||1|1  
THC|tetrahydrocurcumin|C0382876|||C0382876|MSH|1|0.0113|  
THC|thigh circumference|||1|1  
THC|thiocarbanidin|C2699929|||1|1  
THC|total haemocyte count|||1|0.0204|  
THC|total hydrocarbon|||1|0.0102|  
THC|transhepatic cholangiogram|||1|1  
THC|transhepatic cholangiograph|||1|1  
THC|transhepatic cholangiography|||1|1  
THC|transplantable hepatocellular carcinoma|||1|1

TIA|ATTACK, TRANSIENT ISCHEMIC|C0007787|||C0007787|NCI|||  
TIA|Attack, Transient Ischemic|C0007787|||C0007787|MSH|||  
TIA|Attacks, Transient Ischemic|C0007787|||C0007787|MSH|||  
TIA|Brain TIA|C0007787|||C0007787|MSH;NDFRT|||  
TIA|CEREBRAL ISCHEMIA, TRANSIENT|C0007787;C0917805|||C0917805|DXP|||  
TIA|CEREBRAL ISCHEMIA, TRANSITORY|C0917805|||C0917805|DXP|||  
TIA|Cerebral Ischemia, Transient|C0007787;C0917805|||C0917805|MSH|||  
TIA|Cerebral Ischemias, Transient|C0917805|||C0917805|MSH|||  
TIA|ISCHEMIC ATTACK, TRANSIENT|C0007787|||C0007787|NCI|||  
TIA|Ischemia, Transient Cerebral|C0007787;C0917805|||C0917805|MSH|||  
TIA|Ischemias, Transient Cerebral|C0917805|||C0917805|MSH|||  
TIA|Ischemic Attack, Transient|C0007787|||C0007787|MSH;NDFRT|||  
TIA|Ischemic Attack, Transient [Disease/Finding]|||C0007787|NDFRT|||  
TIA|Ischemic Attacks, Transient|C0007787|||C0007787|MSH|||  
TIA|Polynesian arrowroot|C1054154|||C1054154|NCBI|||  
TIA|STROKE, TEMPORARY|C0007787|||C0007787|DXP|||  
TIA|T-cell-restricted intracellular antigen|||1  
TIA|TIA|C0007787;C0917805;C1054154|||C0007787;C0917805|AOD;CHV;CSP;CST;DXP;MEDLI  
NEPLUS;MTHICD9;NCI;SNOMEDCT|||  
TIA|TIA (Transient Ischemic Attack)|C0007787|||C0007787|MSH;NDFRT|||  
TIA|TIA - Transient ischaemic attack|C0007787|||C0007787|SNOMEDCT|||  
TIA|TIA, Brain|C0007787|||C0007787|MSH|||  
TIA|TIAs (Transient Ischemic Attack)|||C0007787|MSH|||  
TIA|TRANSIENT ISCHEMIC ATTACK|C0007787|||C0007787|COSTAR;MTH;NCI|||  
TIA|TRANSIENT ISCHEMIC ATTACKS|C0007787|||C0007787|CST|||  
TIA|Tacca leontopetaloides|C1054154|||C1054154|MTH;NCBI|||  
TIA|Tacca leontopetaloides (L.) Kuntze|C1054154|||C1054154|NCBI|||  
TIA|Tacca pinnatifida|C1054154|||C1054154|NCBI|||  
TIA|Tacca pinnatifida J.R.Forst. & G.Forst.|||C1054154|NCBI|||  
TIA|Temporary cerebral vascular dysfunction|C0007787|||C0007787|SNOMEDCT|||  
TIA|Test Anxiety Inventory|||1  
TIA|Thrombosis-inducing activity|||1|0.0131|  
TIA|Trans cereb ischemia NOS|||C0917805|ICD9CM|||  
TIA|Transient Cerebral Ischemia|C0007787;C0917805|||C0917805|COSTAR;MSH;MTH|||  
TIA|Transient Cerebral Ischemias|C0917805|||C0917805|MSH|||  
TIA|Transient Ischemic  
Attack|C0007787|||C0007787|MEDLINEPLUS;MSH;MTH;NCI;NDFRT|||  
TIA|Transient Ischemic Attacks|C0007787|||C0007787|MSH|||  
TIA|Transient cer. ischaem.|||C0917805|SNOMEDCT|||  
TIA|Transient cer. ischem.|||C0917805|SNOMEDCT|||  
TIA|Transient cerebral ischaemia|C0007787;C0917805|||C0007787|SNOMEDCT|||  
TIA|Transient cerebral ischaemia  
NOS|C0007787;C0917805|||C0007787;C0917805|SNOMEDCT|||  
TIA|Transient cerebral ischaemia NOS (disorder)|||C0007787|SNOMEDCT|||  
TIA|Transient cerebral ischaemia, NOS|C0007787;C0917805|||C0007787|SNOMEDCT|||  
TIA|Transient cerebral  
ischemia|C0007787;C0917805|||C0007787;C0917805|CCS;ICD9CM;ICPC;SNOMEDCT|||  
TIA|Transient cerebral ischemia (disorder)|||C0007787|SNOMEDCT|||  
TIA|Transient cerebral ischemia (disorder) [Ambiguous]|||C0007787|SNOMEDCT|||  
TIA|Transient cerebral ischemia  
NOS|C0007787;C0917805|||C0007787;C0917805|SNOMEDCT|||  
TIA|Transient cerebral ischemia NOS (disorder)|||C0917805|SNOMEDCT|||  
TIA|Transient cerebral ischemia, NOS|C0007787;C0917805|||C0007787|SNOMEDCT|||  
TIA|Transient ischaemic attack|C0007787|||C0007787|SNOMEDCT|||  
TIA|Transient ischaemic attacks|C0007787|||C0007787|SNOMEDCT|||  
TIA|Transient ischemic attack|C0007787|||C0007787|LNC;MTHICD9;OMIM;SNOMEDCT|||  
TIA|Transient ischemic attack (disorder)|||C0007787|SNOMEDCT|||

TIA|Transient ischemic attacks|C0007787|||C0007787|NCI;OMIM;SNOMEDCT|||  
TIA|Transient ischemic attacks (disorder)|||C0007787|SNOMEDCT|||  
TIA|Unspecified transient cerebral ischemia|C0917805|||C0917805|ICD9CM|||  
TIA|attack ischemic transient|||C0007787|CHV|||  
TIA|attacks ischemic transient|||C0007787|CHV|||  
TIA|brain tia|C0007787|||C0007787|CHV|||  
TIA|intermittent cerebral ischemia|C0917805;C1521728|||C0917805|CHV|||  
TIA|ischemic attack transient|||C0007787|CHV|||  
TIA|thin layer immunoassay|||1|0.0179|  
TIA|thymidine incorporation assay|||1|0.0119|  
TIA|tia|C0007787;C0917805;C1054154|||C1054154|NCBI|||  
TIA|tia brain|C0007787|||C0007787|CHV|||  
TIA|trabecular-iris angle|||1|0.006|  
TIA|transient cerebral ischemia|C0007787;C0917805|||C0007787;C0917805|CHV|||  
TIA|transient cerebral ischemic attack|C0007787|||C0007787|AOD|||  
TIA|transient ischaemic attack|C0007787|||C0007787|CHV|1|0.21|  
TIA|transient ischaemic attacks|C0007787|||C0007787|CHV|||  
TIA|transient ischemic  
attack|C0007787|1|1.000|C0007787|CHV;COSTAR;CSP;LNC;MEDLINEPLUS;MSH;MTH;MTHICD9;  
NCI;NDFRT;OMIM;SNOMEDCT|1|0.7053|1  
TIA|transient ischemic attack (TIA)|C0007787|||C0007787|CHV|||  
TIA|transient ischemic attacks|C0007787|||C0007787|CHV|||  
TIA|trypsin inhibitor activity|C1152594|||1|0.0179|  
TIA|tumor-induced angiogenesis|||1|  
TIA|turbidimetric immunoassay|||1|0.0179|  
TIBC|Serum Total Iron-Binding Capacity result|C0036835|||C0036835|MTH|||  
TIBC|Serum iron and total iron binding capacity|||1|0.0753|  
TIBC|tIBC|C0036835|||C0036835|CHV|||  
TIBC|total iron binding  
capacity|C0700379;C1283048|||C0700379;C1283048|CHV;NCI;SNOMEDCT|||  
TIBC|total iron binding capacity (TIBC) test|||C0036835|CHV|||  
TIBC|total iron-binding capacity|C0700379;C1283048|1|1.000|||1|0.9247|1  
TIMI|Thrombolysis in Myocardial Infarction trial|||1|0.0327|  
TIMI|Thrombolysis in Myocardial Ischemia|||1|0.0184|  
TIMI|thrombolysis in myocardial infarction||1|1.000|||1|0.949|  
TIPS|Portasystemic Shunt, Transjugular  
Intrahepatic|C0339897;C1301416|||C0339897|MSH|||  
TIPS|Portosystemic Shunt, Transjugular  
Intrahepatic|C0339897;C1301416|||C0339897|MSH|||  
TIPS|Shunt, Transjugular Intrahepatic  
Portasystemic|C0339897;C1301416|||C0339897|MSH|||  
TIPS|Shunt, Transjugular Intrahepatic  
Portosystemic|C0339897;C1301416|||C0339897|MSH|||  
TIPS|TIPS|C0339897|||C0339897|MSH;MTHICD9|||  
TIPS|TIPS - Transjugular intrahepatic portosystemic  
shunt|||C0339897|SNOMEDCT|||  
TIPS|TIPSS|C0339897|||C0339897|MSH|||  
TIPS|Tonoplast intrinsic proteins|||1|0.0109|  
TIPS|Transjugular Intrahepatic Portasystemic  
Shunt|C0339897;C1301416|||C0339897|MSH|||  
TIPS|Transjugular intrahepatic portosystemic  
shunt|C0339897;C1301416|||C0339897|MTHICD9;SNOMEDCT|1|0.9176|  
TIPS|Transjugular intrahepatic portosystemic shunt  
(procedure)|C0339897|||C0339897|SNOMEDCT|||  
TIPS|Transjugular intrahepatic portosystemic shunt  
procedure|C0339897|||C0339897|MTH|||

TIPS|transjugular intrahepatic portosystemic shunt|C0339897;C1301416|1|1.000|C0339897;C1301416|LNC;MTHICD9;SNOMEDCT|||1  
TIPS|transjugular intrahepatic portosystemic shunting|||||1|0.0373|  
TIPS|transjugular intrahepatic portosystemic stent-shunt|||||1|0.0342|  
TIPS|transvenous intrahepatic portosystemic shunt|||||1|  
TKA|total knee arthroplasty|C0086511|1|1.000|C0086511|CHV;COSTAR|1|0.9871|1  
TKA|total knee arthroscopy|||||1|  
TKA|transketolase activity|C1152029|||||1|  
TKA|trochanter-knee-ankle|||||1|  
TKA|tyrosine kinase activity|||||1|0.0129|1  
TLSO|thoracolumbar spinal orthosis|||||1|  
TLSO|thoracolumbosacral orthosis|1|1.000||||1|  
TMJ|Articulatio temporomandibularis|C0039493|||C0039493|FMA;UWDA|||  
TMJ|Costen Syndrome|C0039496|||C0039496|MSH|||  
TMJ|Costen's Syndrome|C0039496|||C0039496|COSTAR;MSH;NDFRT|||  
TMJ|Costen's complex|||C0039496|SNOMEDCT|||  
TMJ|Costen's syndrome|C0039496|||C0039496|CSP;SNOMEDCT|||  
TMJ|Costen's syndrome (disorder)|||C0039496|SNOMEDCT|||  
TMJ|Costens Syndrome|C0039496|||C0039496|MSH|||  
TMJ|JAW JOINT|C0039493|||C0039493|NCI|||  
TMJ|Jaw Joint|C0039493|||C0039493|NCI|||  
TMJ|Jaw snapping|||C0039496|SNOMEDCT|||  
TMJ|Joint Syndrome, Temporomandibular|C0039496|||C0039496|MSH|||  
TMJ|Joint, Temporomandibular|C0039493;C1269048|||C0039493|MSH|||  
TMJ|Joints, Temporomandibular|C0039493|||C0039493|MSH|||  
TMJ|Mandibular dysfunction|C0039496|||C0039496|SNOMEDCT|||  
TMJ|Myofascial Pain Dysfunction Syndrome, Temporomandibular Joint|C0039496|||C0039496|MSH;NDFRT|||  
TMJ|Myofascial pain - dysfunction syndrome of  
TMJ|C0039496|||C0039496|SNOMEDCT|||  
TMJ|PAIN-DYSFUNCTION SYNDROME|C0039496|||C0039496|DXP|||  
TMJ|Snapping jaw|C0039496|||C0039496|SNOMEDCT|||  
TMJ|Syndrome, Costen's|C0039496|||C0039496|MSH|||  
TMJ|Syndrome, TMJ|C0039496|||C0039496|MSH|||  
TMJ|Syndrome, Temporomandibular Joint|C0039496|||C0039496|MSH|||  
TMJ|TEMPOROMANDIBULAR JOINT PAIN-DYSFUNCTION SYNDROME|C0039496|||C0039496|DXP|||  
TMJ|TEMPOROMANDIBULAR JOINT SYNDROME|C0039496|||C0039496|COSTAR;DXP|||  
TMJ|TEMPOROMANDIBULAR JOINT-PAIN-DYSFUNCTION SYNDROME|C0039496|||C0039496|MTH|||  
TMJ|TMD|||C0039496|MEDLINEPLUS|||  
TMJ|TMJ|||C0039493;C0039496|CHV;DXP;MEDLINEPLUS;MSH;MTH;NCI|||  
TMJ|TMJ SYNDROME|C0039496|||C0039496|DXP;MTH|||  
TMJ|TMJ Syndrome|C0039496|||C0039496|MSH;NDFRT|||  
TMJ|TMJ syndrome|C0039496|||C0039496|CSP;MEDLINEPLUS;SNOMEDCT|||  
TMJ|TMJ-pain-dysfunction syndrome|C0039496|||C0039496|MTHICD9|||  
TMJ|TMJPDS - Temporomandibular joint pain dysfunction syndrome|C0039496|||C0039496|SNOMEDCT|||  
TMJ|Temporomandibular Joint|C0039493;C1269048|||C0039493|MSH;MTH;NCI|||  
TMJ|Temporomandibular Joint Dysfunction|C0039496|||C0039496|MEDLINEPLUS|||  
TMJ|Temporomandibular Joint Dysfunction Syndrome|C0039496|||C0039496|MSH;MTH;NCI;NDFRT|||  
TMJ|Temporomandibular Joint Dysfunction Syndrome [Disease/Finding]|||C0039496|NDFRT|||  
TMJ|Temporomandibular Joint Syndrome|C0039496|||C0039496|MSH;NDFRT|||  
TMJ|Temporomandibular Joints|C0039493|||C0039493|MSH|||  
TMJ|Temporomandibular joint|C0039493;C1269048|||C0039493|FMA;LCH;LNC;SNOMEDCT;UWDA|||  
TMJ|Temporomandibular joint dis.|||C0039496|SNOMEDCT|||

TMJ|Temporomandibular joint dysf.||||C0039496|SNOMEDCT|||  
TMJ|Temporomandibular joint pain dysfunction  
syndrome|C0039496|||C0039496|SNOMEDCT|||  
TMJ|Temporomandibular joint structure|C0039493|||C0039493|SNOMEDCT|||  
TMJ|Temporomandibular joint structure (body structure)|||C0039493|SNOMEDCT|||  
TMJ|Temporomandibular joint syndrome|C0039496|||C0039496|SNOMEDCT|||  
TMJ|Temporomandibular joint syndrome, NOS|C0039496|||C0039496|SNOMEDCT|||  
TMJ|Temporomandibular joint, NOS|C0039493;C1269048|||C0039493|SNOMEDCT|||  
TMJ|Temporomandibular joint-pain-dysfunction  
syndrome|C0039496|||C0039496|MTHICD9;SNOMEDCT|||  
TMJ|Temporomandibular joint-pain-dysfunction syndrome  
(disorder)|||C0039496|SNOMEDCT|||  
TMJ|Temporomandibular joints|C0039493|||C0039493|LNC|||  
TMJ|Temporomandibular synd.||||C0039496|SNOMEDCT|||  
TMJ|Temporomandibular syndrome|||C0039496|SNOMEDCT|||  
TMJ|costen syndrome|C0039496|||C0039496|CHV|||  
TMJ|costen's syndrome|C0039496|||C0039496|CHV|||  
TMJ|costens syndrome|C0039496|||C0039496|CHV|||  
TMJ|dysfunction tmj|C0039496|||C0039496|CHV|||  
TMJ|jaw joint|C0039493|||C0039493|CHV|||  
TMJ|jaw snap|C0039496|||C0039496|CHV|||  
TMJ|jaw snapping|||C0039496|CHV|||  
TMJ|jaw snaps|C0039496|||C0039496|CHV|||  
TMJ|mandibular dysfunction|C0039496|||C0039496|CHV|||  
TMJ|pain-dysfunction syndrome|C0039496|||C0039496|CHV|||  
TMJ|syndrome tmj|C0039496|||C0039496|CHV|||  
TMJ|temporomandibular|||||1|0.0053|  
TMJ|temporomandibular dysfunction syndrome|C0039496|||C0039496|CSP|||  
TMJ|temporomandibular  
joint|C0039493;C1269048|1|1.000|C0039493;C1269048|CHV;CSP;FMA;LCH;LNC;MSH;MTH;NC  
I;SNOMEDCT;UWDA|1|0.9947|1|  
TMJ|temporomandibular joint (TMJ)|C0039493;C1269048|||C0039493|CHV|||  
TMJ|temporomandibular joint syndrome|C0039496|||C0039496|CHV;CSP|||  
TMJ|tmj dysfunction|C0039496|||C0039496|CHV|||  
TMJ|tmj syndrome|C0039496|||C0039496|CHV|||  
TMJ|tmj temporomandibular joint|C0039493;C1269048|||C0039493|CHV|||  
TM|Ear Drum|C0041445|||C0041445|NCI|||  
TM|Ear drum|C0041445|||C0041445|FMA;SNOMEDCT;UWDA|||  
TM|Ear drum, NOS|C0041445|||C0041445|SNOMEDCT|||  
TM|Eardrum|C0041445|||C0041445|MSH;NCI;SNOMEDCT|||  
TM|Eardrums|C0041445|||C0041445|MSH|||  
TM|Landsat Thematic Mapper|||||1|0.005|  
TM|Lateral wall of tympanic cavity|C0041445|||C0041445|FMA;UWDA|||  
TM|Meditation, Transcendental|C0150814|||C0150814|MSH|||  
TM|Membrana Tympanica|C0041445|||C0041445|NCI|||  
TM|Membrana tympanica|C0041445|||C0041445|FMA;UWDA|||  
TM|Membrane, Tympanic|C0041445;C1268971|||C0041445|MSH;NCI|||  
TM|Membranes, Tympanic|C0041445|||C0041445|MSH|||  
TM|Membranous wall of tympanic cavity|C0041445|||C0041445|FMA;UWDA|||  
TM|Molybdate(2-), tetrathioxo-, (T-4)-|||C0076339|MSH|||  
TM|Paries membranaceus cavi tympani|C0041445|||C0041445|FMA|||  
TM|Rivinus' membrane|C0041445|||C0041445|FMA;UWDA|||  
TM|TKM|C0041403|||C0041403|NCI|||  
TM|TM|||C0040722;C0041403;C0041445;C0076339;C0150814|MSH;NCI;PDQ|||  
TM|TRANSM|||C0040722|MSH|||  
TM|TTM cpd|C0076339|||C0076339|MSH|||  
TM|TURKMENISTAN|C0041403|||C0041403|NCI|||

TM|TX||||C0041403|NCI|||  
TM|TYMPANIC MEMBRANE|C0041445;C1268971|||C0041445|NCI|||  
TM|Tamoxifen|C0039286||||1|0.0037|  
TM|Tetrathiomolybdate|C0076339|||C0076339|SNOMEDCT|||  
TM|Tetrathiomolybdate (substance)|||C0076339|SNOMEDCT|||  
TM|Tetrathiomolybdic acid|C0076339|||C0076339|SNOMEDCT|||  
TM|Thayer-Martin||||||1  
TM|Thrombotic microangiopathy|C2717961||||1|0.0067|  
TM|Tibetan medicine||||||1  
TM|Transcendental Meditation|C0150814|||C0150814|MSH;MTH;NCI|||1  
TM|Transcendental Meditation Therapy|C0150814;C0204530|||C0150814|NCI|||  
TM|Transcendental meditation|C0150814|||C0150814|SNOMEDCT|||  
TM|Transcendental meditation (religion/philosophy)|||C0150814|SNOMEDCT|||  
TM|Tunicamycin|C0041385||||1|0.0383|  
TM|Turkmen S.S.R.|C0041403|||C0041403|LCH;MSH|||  
TM|Turkmen SSR|||C0041403|MSH|||  
TM|Turkmenistan|C0041403|||C0041403|AOD;MSH;MTH;NCI;SNOMEDCT|||  
TM|Turkmenistan (geographic location)|||C0041403|SNOMEDCT|||  
TM|Tympanic Membrane|C0041445;C1268971|||C0041445|MSH;NCI|||  
TM|Tympanic Membranes|C0041445|||C0041445|MSH|||  
TM|Tympanic membrane|C0041445;C1268971|||C0041445|FMA;LCH;LNC;SNOMEDCT;UWDA|||  
TM|Tympanic membrane structure|C0041445|||C0041445|MTH;SNOMEDCT|||  
TM|Tympanic membrane structure (body structure)|||C0041445|SNOMEDCT|||  
TM|Tympanic membrane, NOS|C0041445;C1268971|||C0041445|SNOMEDCT|||  
TM|alpha-tropomyosin|C0002317||||1|0.006|  
TM|capacity|C1516240||||1|0.0037|  
TM|disease transmission qualifier|C0040722|||C0040722|MTH|||  
TM|ear drum|C0041445|||C0041445|CSP|||  
TM|eardrum|C0041445|||C0041445|AOD;CHV|||  
TM|eardrums|C0041445|||C0041445|CHV|||  
TM|melting point|C1881775||||1|0.0033|  
TM|melting temperature||||1|0.0659|1  
TM|method|C0025663;C0449851;C0871511||||1|0.003|  
TM|midpoint||||1|0.003|  
TM|muscle|C0026845||||1|0.0037|  
TM|neurons of the tuberomammillary||||1|0.0007|  
TM|phase transition|C1257888||||1|0.0023|  
TM|phase transition temperature||||1|0.023|  
TM|seven-transmembrane||||1|0.0037|  
TM|tail moment||||1|0.0043|  
TM|tectorial membrane|C0039432;C1289393||||1|0.0163|1  
TM|telangiectatic matting||||||1  
TM|temperature by mouth||||||1  
TM|temperature, muscle||||||1  
TM|temporalis muscle|C0039487;C1275494||||||1  
TM|temporomandibular||||1|0.01|1  
TM|teres major||||||1  
TM|term milk||||||1  
TM|testicular microlithiasis|C1864873||||1|0.009|  
TM|tetrathiomolybdate|C0076339|||C0076339|CHV;MSH;MTH;PDQ|1|0.0073|  
TM|thalassaemia major|C0002875||||1|0.006|  
TM|thalassemia major|C0002875||||1|0.011|1  
TM|thrombomodulin|C0145779;C0373785;C1420720||||1|0.2079|1  
TM|thulium|C0040066||||||1  
TM|time and modifying||||||1  
TM|time motion||||||1  
TM|time required to complete M phase of cell cycle||||||1

TM|timolol maleate|C0087093|||||1|0.0033|  
TM|tooth mobility|C0040445|||||1|0.0037|  
TM|trabecular meshwork|C0040573;C1281294|||||1|0.0619|1  
TM|trademark|C0282291|||||||1  
TM|transcendental Meditation|C0150814|||||1|0.021|  
TM|transcendental meditation|C0150814|||C0150814|AOD;MSH;MTH;NCI;SNOMEDCT|||  
TM|transformed migraine|C1960870|||||1|0.0057|  
TM|transgenic mice|C0025936|||||1|0.0037|  
TM|transitional mucosa||||||1|0.004|1  
TM|transmediastinal|||||||1  
TM|transmembrane|C1167322;C2752508|||||1|0.2176|  
TM|transmembrane domain|C1519623|||||1|0.0346|  
TM|transmembrane glycoprotein|C1415205|||||1|0.0043|  
TM|transmembrane protein|C0021699|||||1|0.009|  
TM|transmembrane region|C1519623|||||1|0.004|  
TM|transmembrane segment||||||1|0.0126|  
TM|transmembrane subunit||||||1|0.003|  
TM|transmetatarsal|||||||1  
TM|transmission|C0040722;C0242781;C1521797|||C0040722|MSH|||  
TM|transport maximum||||||1|0.0113|1  
TM|transport mechanism|||||||1  
TM|transport medium|||||||1  
TM|transverse myelitis|C0026976|||||1|0.008|1  
TM|treadmill|C0184069;C2712999|||||1|0.0143|1  
TM|trimester|C0032982|||||||1  
TM|tropical medicine|C0041186|||||||1  
TM|tropomyosin|C0041197||||||1|0.0549|  
TM|tuberculosis meningitis|C0041318|||||||1  
TM|tuberculosis meningitis|C0041318||||||1|0.004|  
TM|tuberomammillary nucleus||||||1|0.0027|  
TM|tuberomammillary nucleus|C0228377;C1289549||||||1|0.0077|  
TM|tubular maximal|||||||1  
TM|tubular maximum|||||||1  
TM|tubular myelin|C0077483||||||1|0.0033|1  
TM|tumor|C0027651;C1578706|||||||1  
TM|tumor-bearing mice|||||||1  
TM|tumour markers|C0041365;C1139415||||||1|0.0017|  
TM|tunicamycin|C0041385|||C0041385|CHV;CSP;LCH;MSH;NDFRT|||  
TM|turkmenistan|C0041403|||C0041403|CHV|||  
TM|tympanic membrane|C0041445;C1268971|1|1.000|C0041445|CHV;CSP|1|0.0605|1  
TM|tympanic membranes|C0041445|||C0041445|CHV|||  
TM|tympanometric|||||||1  
TOBI|Tobi|C0723764|||C0723764|RXNORM|||  
TOBI|tobi|C0723764|||C0723764|CHV|||  
TOBI|tobi [brand name]|C0723764|||C0723764|CHV|||  
TOBI|tobramycin|C0040341|1|1.000|||  
TOBI|tobramycin solution for inhalation|||||||1  
TOBI|toxin binding inhibition||||||1|1|  
TPA|12 Myristoyl 13 acetylphorbol|C0039654|||C0039654|MSH|||  
TPA|12 O Tetradecanoyl Phorbol 13 Acetate|C0039654|||C0039654|MSH|||  
TPA|12-Myristoyl-13-acetylphorbol|C0039654|||C0039654|MSH;NDFRT|||  
TPA|12-O-Tetra-decanoylphorbol-13-acetate||||||1|0.0106|  
TPA|12-O-Tetradecanoyl Phorbol 13-Acetate|C0039654|||C0039654|MSH;NDFRT|||  
TPA|12-O-tetra-decanoyl-phorbol-13-acetate||||||1|0.0053|  
TPA|12-O-tetradecanoyl-13-acetate||||||1|0.0095|  
TPA|12-O-tetradecanoylphorbol 13-acetate|C0039654|||||||1  
TPA|12-O-tetradecanoylphorbol-13-acetate|C0039654|||C0039654|NCI;PDQ|||

TPA|12-tetradecanoyl-phorbol-13-acetate|||||1|0.0071|  
TPA|12-tetradecanoylphorbol-13-acetate|||||1|0.0065|  
TPA|13-Acetate, 12-O-Tetradecanoyl Phorbol|C0039654|||C0039654|MSH|||  
TPA|ALTEPLASE|C0032143|||C0032143|NCI;NDFRT;VANDF|||  
TPA|ALTEPLASE, RECOMBINANT|||C0032143|NDFRT;VANDF|||  
TPA|Acetate, Phorbol Myristate|C0039654|||C0039654|MSH|||  
TPA|Acetate, Tetradecanoylphorbol|C0039654|||C0039654|MSH|||  
TPA|Activase|C0032143;C0701942|||C0032143|NCI|||  
TPA|Alteplase|C0032143|||C0032143|MSH;MTH;NCI;NDFRT;RXNORM;SNOMEDCT|||  
TPA|Alteplase (product)|||C0032143|SNOMEDCT|||  
TPA|Alteplase (substance)|||C0032143|SNOMEDCT|||  
TPA|Alteplase - chemical|||C0032143|SNOMEDCT|||  
TPA|Alteplase - chemical (substance)|||C0032143|SNOMEDCT|||  
TPA|Myristate Acetate, Phorbol|C0039654|||C0039654|MSH|||  
TPA|PLASMINOGEN ACTIVATOR, TISSUE|C0032143;C1367601|||C1367601|OMIM|||  
TPA|PLAT|||C0032143;C1367601|HUGO;NCI;OMIM|||  
TPA|PLAT Gene|C1367601|||C1367601|NCI|||  
TPA|PLAT gene|C1367601|||C1367601|HUGO;MTH|||  
TPA|PLAT wt Allele|C1706149|||C1706149|MTH;NCI|||  
TPA|PMA|C0039654;C0048451;C2825188|||C0039654|NCI;PDQ|||  
TPA|PMA (phorbol myristate acetate)|||C0039654|CSP|||  
TPA|PMAS|C0039654|||C0039654|NCI|||  
TPA|Phorbol 13-Acetate, 12-O-Tetradecanoyl|C0039654|||C0039654|MSH|||  
TPA|Phorbol Myristate Acetate|C0039654|||C0039654|MSH;NCI;NDFRT;PDQ|||  
TPA|Plasminogen Activator (Human Tissue-Type Protein Moiety)|||C0032143|NCI|||  
TPA|Plasminogen Activator, Tissue|C0032143;C1367601|||C0032143|MSH|||  
TPA|Plasminogen Activator, Tissue Gene|C1367601|||C1367601|NCI|||  
TPA|Plasminogen Activator, Tissue Type|C0032143|||C0032143|MSH|||  
TPA|Plasminogen Activator, Tissue wt Allele|C1706149|||C1706149|NCI|||  
TPA|Plasminogen Activator, Tissue-Type|C0032143|||C0032143|MSH;NDFRT|||  
TPA|Plasminogen activator tissue type|C0032143|||C0032143|LNC|||  
TPA|Recombinant Tissue Plasminogen Activator|C0032143|||C0032143|NCI|||  
TPA|T Plasminogen Activator|C0032143|||C0032143|MSH|||  
TPA|T-PA|C0032143|||C0032143|SNOMEDCT|||  
TPA|T-PA - tissue-type plasminogen activator|C0032143|||C0032143|SNOMEDCT|||  
TPA|T-Plasminogen Activator|C0032143|||C0032143|MSH;NCI;NDFRT|||  
TPA|T-plasminogen activator|C0032143|||C0032143|SNOMEDCT|||  
TPA|T-plasminogen activator (substance)|||C0032143|SNOMEDCT|||  
TPA|TPA|C0032143|||C0032143;C0039654;C1367601;C1706149|CSP;NCI;OMIM;PDQ|||  
TPA|TPA (tetradecanoylphorbol acetate)|||C0039654|CSP|||  
TPA|TPA (tissue plasminogen activator)|||C0032143|CSP|||  
TPA|TPPA|C0032143;C1421223|||C0032143|MSH;NDFRT|||  
TPA|Terephthalic acid|C0076117|||||1|0.0089|  
TPA|Tetradecanoic acid, 9a-(acetyloxy)-1a,1b,4,4a,5,7a,7b,8,9,9a-decahydro-4a,7b-dihydroxy-3-(hydroxymethyl)-1,1,6,8-tetramethyl-5-oxo-1H-cyclopropa(3,4)benz(1,2-e)azulen-9-yl ester, (1aR-(1aalpha,1bbeta,4abeta,7aalpha,7balpha,8alpha,9beta,9aalpha))-  
|||C0039654|MSH;NDFRT|||  
TPA|Tetradecanoylphorbol Acetate|C0039654|||C0039654|MSH;MTH;NCI;NDFRT;PDQ|||  
TPA|Tetradecanoylphorbol Acetate [Chemical/Ingredient]|||C0039654|NDFRT|||  
TPA|Tisokinase|C0032143|||C0032143|MSH;NDFRT|||  
TPA|Tissue Activator D 44|C0032143|||C0032143|MSH|||  
TPA|Tissue Activator D-44|C0032143|||C0032143|MSH;NDFRT|||  
TPA|Tissue Plasminogen Activator|C0032143;C1367601|||C0032143|MSH;NCI;NDFRT|||  
TPA|Tissue Plasminogen Activator [Chemical/Ingredient]|||C0032143|NDFRT|||  
TPA|Tissue Type Plasminogen Activator|C0032143|||C0032143|MSH|||  
TPA|Tissue plasminogen activator|C0032143;C1367601|||C0032143|SNOMEDCT|||

TPA|Tissue plasminogen activator (substance)|||C0032143|SNOMEDCT|||  
TPA|Tissue plasminogen activator preparation|C0032143||C0032143|SNOMEDCT|||  
TPA|Tissue plasminogen activator preparation (product)|||C0032143|SNOMEDCT|||  
TPA|Tissue plasminogen activator preparation (substance)|||C0032143|SNOMEDCT|||  
TPA|Tissue-Type Plasminogen Activator|C0032143||C0032143|MSH;NCI;NDFRT|||  
TPA|Tissue-type plasminogen activator|C0032143||C0032143|SNOMEDCT|||  
TPA|Tissue-type plasminogen activator  
preparation|C0032143||C0032143|SNOMEDCT|||  
TPA|Tpa|C0032143||C1623117|GO|||  
TPA|Treponema pallidum agglutination|||||||1  
TPA|alteplase|C0032143||C0032143|CHV|1|0.01|  
TPA|phorbol 12-myristate 13-acetate|||||1|0.0727|  
TPA|phorbol diester|||||1|0.0041|  
TPA|phorbol ester|C0031586|||||1|0.1229|  
TPA|phorbol ester 12-0-tetradecanoylphorbol-13-acetate|||||1|0.01|  
TPA|phorbol ester 12-0-tetradecanoyl-phorbol-13-acetate|||||1|0.0644|  
TPA|phorbol ester 12-0-tetradecanoylphorbol-13-acetate|||||1|0.2014|  
TPA|plasminogen activator, tissue|C0032143;C1367601||C1367601|HUGO|||  
TPA|r-tPA|C0032143||C0032143|NCI|||  
TPA|recombinant tissue plasminogen activator|C0032143||C0032143|NCI;PDQ|||  
TPA|rt-PA|C0032143||C0032143|NCI;PDQ;SNOMEDCT|||  
TPA|rt-PA preparation|C0032143||C0032143|SNOMEDCT|||  
TPA|t-PA|C0032143||C0032143|NCI;PDQ;SNOMEDCT|||  
TPA|t-PA preparation|C0032143||C0032143|SNOMEDCT|||  
TPA|t-pa|C0032143||C0032143|CHV|||  
TPA|t-plasminogen activator|C0032143||C0032143|CHV|||  
TPA|tPA|C0032143||C0032143|NCI;SNOMEDCT|||  
TPA|tannic acid, polyphosphomolybdic acid, and amido acid|||||||1  
TPA|taurine-pyruvate aminotransferase activity|C1623117||C1623117|GO;MTH|||  
TPA|taurine:pyruvate aminotransferase activity|C1623117||C1623117|GO|||  
TPA|temporary portacaval anastomosis|||||||1  
TPA|temporopolar artery|||||||1  
TPA|tetradecanoyl phorbol acetate|C0039654|||||1|0.0744|  
TPA|tetradecanoylphorbol acetate|C0039654||C0039654|CSP;NCI|1|0.0496|  
TPA|tetradecanoylphorbol-13-acetate|||||1|0.0112|  
TPA|texture profile analysis|||||||1|0.0071|  
TPA|third-party administrator|||||||1  
TPA|thrombotic pulmonary artery|||||||1  
TPA|time-resolved phosphorescence anisotropy|||||||1|0.0083|  
TPA|tissue plasminogen  
activator|C0032143;C1367601|1|0.998|C0032143|CHV;CSP;NCI|||1  
TPA|tissue polypeptide  
antigen|C0076729||C0076729|LNC;MSH;MTH;NDFRT;SNOMEDCT|||1  
TPA|tissue type|C0019633;C2713035|||||1|0.0177|  
TPA|tissue-type PA|||||||1|0.0892|  
TPA|total parenteral alimentation|||||||1  
TPA|total phobic anxiety|||||||1  
TPA|tpa|C0032143||C0032143|CHV|||  
TPA|tripropylamine|C0382766|||||1|0.0059|  
TPA|tumor polypeptide antigen|||||||1  
TPA|tumor promoter|C0041370|||||1|0.0059|  
TPA|tumor promoter 12-0-tetradecanoyl-phorbol-13-acetate|||||||1|0.01|  
TPA|tumor promoter 12-0-tetradecanoyl-phorbol-13-acetate|||||||1|0.0313|  
TPA|tumor promoter 12-0-tetradecanoylphorbol-13-acetate|||||||1|0.1483|  
TPA|two-photon absorption|||||||1|0.0077|

TPN|Adenosine 5'-(trihydrogen diphosphate), 2'-(dihydrogen phosphate), P'-5'-  
ester with 3-(aminocarbonyl)-1-beta-D-ribofuranosylpyridinium, inner  
salt|||C0027303|MSH;NDFRT|||  
TPN|COENZYME A A 02|||C0027303|MSH|||  
TPN|Central hyperalimentation|C0030548|||C0030548|SNOMEDCT|||  
TPN|Coenzyme II|C0027303|||C0027303|MSH;NDFRT|||  
TPN|Dinucleotide Phosphate, Nicotinamide-Adenine|C0027303|||C0027303|MSH|||  
TPN|Hyperalimentation|C0020505;C0030548;C1368829|||C0030548|MEDLINEPLUS;MTHICD9;  
SNOMEDCT|||  
TPN|Hyperalimentation, Parenteral|C0030548|||C0030548|MSH|||  
TPN|NAD phosphate|C0027303|||C0027303|AOD;CSP|||  
TPN|NAD(H) phosphate|C0027303|||C0027303|AOD;CSP|||  
TPN|NADH phosphate|C0027303|||C0027303|CSP|||  
TPN|NADP|C0027303|||C0027303|AOD;CSP;MSH;MTH;NCI;NDFRT|||  
TPN|NADP [Chemical/Ingredient]|||C0027303|NDFRT|||  
TPN|NADPH|C0027303|||C0027303|CSP;MSH;NDFRT|||  
TPN|Nicotinamide Adenine Dinucleotide Phosphate|C0027303|||C0027303|MSH|||  
TPN|Nicotinamide adenine dinucleotide phosphate|C0027303|||C0027303|SNOMEDCT|||  
TPN|Nicotinamide adenine dinucleotide phosphate  
(substance)|||C0027303|SNOMEDCT|||  
TPN|Nicotinamide-Adenine Dinucleotide Phosphate|C0027303|||C0027303|MSH;NDFRT|||  
TPN|Nucleotide, Triphosphopyridine|C0027303|||C0027303|MSH|||  
TPN|Nutrition, Total Parenteral|C0030548|||C0030548|MSH|||  
TPN|Parent infus nutrit sub|||C0030548|ICD9CM|||  
TPN|Parenteral Hyperalimentation|C0030548|||C0030548|MSH|||  
TPN|Parenteral Nutrition, Total|C0030548|||C0030548|MSH;MTH|||  
TPN|Parenteral hyperalimentation|C0030548|||C0030548|SNOMEDCT|||  
TPN|Parenteral infusion of concentrated nutritional  
substances|C0030548|||C0030548|ICD9CM|||  
TPN|Phosphate, Nicotinamide-Adenine Dinucleotide|C0027303|||C0027303|MSH|||  
TPN|Superalimentation|C0030548|||C0030548|SNOMEDCT|||  
TPN|Suralimentation|C0030548|||C0030548|SNOMEDCT|||  
TPN|TAP binding protein (tapasin)|||C1420583|HUGO|||  
TPN|TAP-BINDING PROTEIN|||C1420583|OMIM|||  
TPN|TAPA|C0617168;C1420583|||C1420583|HUGO|||  
TPN|TAPASIN|C0664943;C1420583|||C1420583|OMIM|||  
TPN|TAPBP|C1420583|||C1420583|HUGO;OMIM|||  
TPN|TAPBP gene|C1420583|||C1420583|HUGO;MTH|||  
TPN|TPN|C1420583|||C0027303;C0030548;C1420583|CHV;DXP;LNC;MEDLINEPLUS;MSH;MTHICD  
9;NCI;OMIM;SNOMEDCT|||  
TPN|TPN (total parenteral nutrition)|C0030548|||C0030548|CSP|||  
TPN|TPN - Total parenteral nutrition|C0030548|||C0030548|SNOMEDCT|||  
TPN|TPN procedure|C0030548|||C0030548|SNOMEDCT|||  
TPN|TPSN|C1420583|||C1420583|OMIM|||  
TPN|Total Parenteral Nutrition|C0030548|||C0030548|MSH;NCI|||  
TPN|Total parenteral nutrition|C0030548|||C0030548|MTHICD9;SNOMEDCT|||  
TPN|Total parenteral nutrition (procedure)|||C0030548|SNOMEDCT|||  
TPN|Total parenteral nutrition (regime/therapy)|||C0030548|SNOMEDCT|||  
TPN|Total parenteral nutrition administration|C0030548|||C0030548|SNOMEDCT|||  
TPN|Triphosphopyridine Nucleotide|C0027303|||C0027303|MSH;NDFRT|||  
TPN|hyperalimentation|C0020505;C0030548;C1368829|||C0030548|CHV;NCI|||  
TPN|hyperalimentation therapy|C0030548;C0204706|||C0030548|CHV;CSP|||  
TPN|nadp|C0027303|||C0027303|CHV|||  
TPN|nadph|C0027303|||C0027303|CHV|||  
TPN|nicotinamide adenine dinucleotide phosphate|C0027303|||C0027303|CSP|||  
TPN|nicotinamide adenine dinucleotide phosphate  
(NADP)|C0027303|||C0027303|CHV|||

TPN|nicotinamide-adenine dinucleotide phosphate|C0027303|||C0027303|AOD|||  
TPN|parenteral alimentation|C0030547;C0030548;C0204706|||C0030548|CHV|||  
TPN|parenteral nutrition|C0030547;C0030548|||C0030548|NCI|||  
TPN|thalamic projection neuron|||||||1  
TPN|total parenteral||||||1|0.0025|  
TPN|total parenteral nutrient||||||1|0.016|  
TPN|total parenteral  
nutrition|C0030548|1|1.000|C0030548|CHV;CSP;MSH;MTHICD9;NCI;SNOMEDCT|1|0.9815|1  
TPN|total parenteral nutrition (TPN)|C0030548|||C0030548|CHV|||  
TPN|triphosphopyridine nucleotide|C0027303|||C0027303|CHV;CSP;MSH;NDFRT|||1  
TR|CD71|||C1619635|LNC;NCI|||  
TR|CD71 Antigen|C1619635|||C1619635|NCI|||  
TR|CD71 antigen|C1619635|||C1619635|MSH;MTH|||  
TR|CF2R|C1366449;C1705939|||C1366449;C1705939|HUGO;NCI;OMIM|||  
TR|COAGULATION FACTOR II RECEPTOR|C0668084;C1366449|||C1366449|OMIM|||  
TR|CT120.2|C1420775|||C1420775|HUGO|||  
TR|Coagulation Factor II (Thrombin) Receptor Gene|||C1366449|NCI|||  
TR|Coagulation Factor II (Thrombin) Receptor wt Allele|||C1705939|NCI|||  
TR|Country of Turkey|C0041400|||C0041400|MTH|||  
TR|F2R|C0668084;C1366449|||C1366449|HUGO;NCI;OMIM|||  
TR|F2R Gene|C1366449|||C1366449|NCI|||  
TR|F2R gene|C1366449|||C1366449|HUGO;MTH|||  
TR|F2R wt Allele|C1705939|||C1705939|MTH;NCI|||  
TR|HPP1|C1420775|||C1420775|HUGO;OMIM|||  
TR|HYPERPLASTIC POLYPOSIS GENE 1|C1420775|||C1420775|OMIM|||  
TR|Lymphocyte antigen CD71|C1619635|||C1619635|SNOMEDCT|||  
TR|Lymphocyte antigen CD71 (substance)|||C1619635|SNOMEDCT|||  
TR|PAR-1|C1366449;C1414387|||C1366449|HUGO|||  
TR|PAR1|C1366449;C1414387|||C1366449;C1705939|HUGO;NCI;OMIM|||  
TR|PROTEASE-ACTIVATED RECEPTOR 1|C0668084;C1366449|||C1366449|OMIM|||  
TR|Repetition Time|C2826099|||C2826099|MTH;NCI|||  
TR|SCARNA19|C1366448|||C1366448|HUGO|||  
TR|SELENOPROTEIN Z|C1425351|||C1425351|OMIM|||  
TR|SELZ|C1425351|||C1425351|OMIM|||  
TR|T regulatory||||||1|0.0188|  
TR|T9|C1179693;C1418972;C1619635|||C1619635|NCI|||  
TR|TELOMERASE RNA CANDIDATE 3|C1366448|||C1366448|OMIM|||  
TR|TELOMERASE RNA COMPONENT|C0935992;C1366448|||C1366448|OMIM|||  
TR|TENB2|C1420775|||C1420775|HUGO|||  
TR|TERC|C0935992;C1366448;C1705312|||C1366448;C1705312|HUGO;NCI;OMIM|||  
TR|TERC Gene|C1366448|||C1366448|NCI|||  
TR|TERC gene|C1366448|||C1366448|HUGO;MTH|||  
TR|TERC wt Allele|C1705312|||C1705312|MTH;NCI|||  
TR|TFR|||C1619635|NCI|||  
TR|TFR1|C1420708;C1619635|||C1619635|NCI|||  
TR|TFRC|C1420708;C1619635;C1705610|||C1619635|NCI|||  
TR|THIOREDOXIN REDUCTASE 2|C1258336;C1425351|||C1425351|OMIM|||  
TR|THIOREDOXIN REDUCTASE, MITOCHONDRIAL|C1425351|||C1425351|OMIM|||  
TR|THROMBIN RECEPTOR|C0076552;C0668084;C1366449|||C1366449|OMIM|||  
TR|TMEFF2|C1420775|||C1420775|HUGO;OMIM|||  
TR|TMEFF2 gene|C1420775|||C1420775|HUGO;MTH|||  
TR|TOMOREGULIN|C1420775|||C1420775|OMIM|||  
TR|TPEF|C1420775|||C1420775|HUGO|||  
TR|TR|||C0040733;C0041400;C0332121;C1366448;C1366449;C1420775;C1425351;C1619635  
;C1705312;C1705939;C2826099|HUGO;MSH;NCI;OMIM;SNOMEDCT|||  
TR|TR-BETA|C0242469;C1425351|||C1425351|OMIM|||  
TR|TR3|||C1425351|HUGO;OMIM|||

TR|TRANSMEMBRANE PROTEIN WITH EGF-LIKE AND 2 FOLLISTATIN-LIKE DOMAINS  
2|||C1420775|OMIM|||  
TR|TRANSPL|||C0040733|MSH|||  
TR|TRC3|C1366448;C1705312|||C1366448;C1705312|HUGO;NCI;OMIM|||  
TR|TRFR|C1420708;C1619635;C1705610|||C1619635|NCI|||  
TR|TRXR2|C1425351|||C1425351|HUGO;OMIM|||  
TR|TU|C1532464;C2700314|||C0041400|NCI|||  
TR|TUR|||C0041400|NCI|||  
TR|TURKEY|C0041400;C0325628;C2348826|||C0041400|NCI|||  
TR|TXNRD2|C1425351|||C1425351|HUGO;OMIM|||  
TR|TXNRD2 gene|C1425351|||C1425351|HUGO;MTH|||  
TR|Telomerase RNA Component Gene|C1366448|||C1366448|NCI|||  
TR|Telomerase RNA Component wt Allele|C1705312|||C1705312|NCI|||  
TR|Texas red|C0076359|||1|0.0072|  
TR|Thiazin red|C0963609|||1|0.0043|  
TR|Thioredoxin reductase|C0039941|||1|0.058|  
TR|Tiazofurin|C0076656|||1|0.013|  
TR|Transferrin Receptor|C0034845;C1420708;C1619635|||C1619635|NCI|||  
TR|Transferrin Receptor 1|C1420708;C1619635|||C1619635|NCI|||  
TR|Transferrin Receptor Protein 1|C1619635|||C1619635|NCI|||  
TR|Treatment required for|||C0332121|MTH;SNOMEDCT|||  
TR|Treatment required for (contextual qualifier)|||C0332121|SNOMEDCT|||  
TR|Treatment required for (contextual qualifier) (qualifier  
value)|||C0332121|SNOMEDCT|||  
TR|Turkey|C0041400;C0325628;C2348826|||C0041400|AOD;LCH;MSH;NCI|||  
TR|Turkey (country)|C0041400|||C0041400|CSP|||  
TR|Turkey - country|C0041400|||C0041400|SNOMEDCT|||  
TR|Turkey - country (geographic location)|||C0041400|SNOMEDCT|||  
TR|Turnover rates|||1|0.0043|  
TR|cancer/testis antigen family 120, member 2|C1420775|||C1420775|HUGO|||  
TR|coagulation factor II (thrombin) receptor|||C1366449|HUGO|||  
TR|hTR|C0935992;C1366448|||C1366448|HUGO|||  
TR|human transferrin receptor|||1|0.008|  
TR|p90|C1413107;C1537472;C1619635|||C1619635|NCI|||  
TR|ratio|C0456603;C1547037|||1|0.0145|  
TR|recovery time|||1|  
TR|rectal temperature|C0489749|||C0489749|CHV;SNOMEDCT|1|0.0486|1  
TR|recurrence|C0034897;C1458156;C2825055|||1|0.0065|  
TR|regulatory T|||1|0.0181|  
TR|repetition|C0205341|||1|0.0101|  
TR|repetition time|C2826099|||C2826099|MTH;NCI|1|0.1558|1  
TR|residual tuberculin|||1|  
TR|resistance|C0237834;C1514892|||1|0.0109|  
TR|resistant|C0332325;C2827757|||1|0.0065|  
TR|response|C0871261;C1704632;C1706817;C2911692|||1|0.0101|  
TR|retention times|||1|0.0058|  
TR|selenoprotein Z|C1425351|||C1425351|HUGO|||  
TR|small Cajal body-specific RNA 19|C1366448|||C1366448|HUGO|||  
TR|tandem repeat|C0039290|||C0039290|CHV;MSH|1|0.0116|  
TR|taste reactivity|||1|0.013|  
TR|telomerase RNA component|C0935992;C1366448|||C1366448|HUGO|||  
TR|temperature-resistant|||1|0.0065|  
TR|terminal repeat|C0039551|||C0039551|MSH|1|0.0268|1  
TR|tetrazolium reduction|||1|  
TR|therapeutic  
radiology|C0243004;C0243005;C1522449|||C0243004;C0243005;C1522449;C1555882|CCS;H  
L7V3.0;MSH;NCI;SNOMEDCT|||1





TSH|thyroid stimulating hormone|C0040160;C0696098;C1535531|||C0040160|CHV;CSP|||  
TSH|thyroid stimulating hormone  
(TSH)|C0040160;C0696098;C1535531|||C0040160|CHV|||  
TSH|thyroid stimulating hormone (TSH) test|||C0202230|CHV|||  
TSH|thyroid-stimulating  
hormone|C0040160;C0696098;C1535531|1|1.000|C0040160|CHV;MSH;NCI;NDFRT|1|0.5193|1  
TSH|thyrotrophin|C0040160;C1535531|||C0040160|MSH;NDFRT;SNOMEDCT|||  
TSH|thyrotropic|||1|0.0023|  
TSH|thyrotropic hormone|C0040160|||C0040160|CHV|||  
TSH|thyrotropin|C0040160;C1535531|||C0040160|AOD;CHV;CSP|1|0.4623|  
TSH|thyrotropine|||1|0.0021|  
TTP|2'-deoxythymidine-5'-triphosphate|C0076582|||C0076582|MSH|||  
TTP|A DISINTEGRIN-LIKE AND METALLOPROTEASE WITH THROMBOSPONDIN TYPE 1 MOTIF,  
13|||C1413036|OMIM|||  
TTP|ADAM metalloproteinase with thrombospondin type 1 motif,  
13|||C1413036|HUGO|||  
TTP|ADAMTS13|C1413036|||C1413036|HUGO;OMIM|||  
TTP|ADAMTS13 gene|C1413036|||C1413036|HUGO;MTH|||  
TTP|Congenital Thrombotic Thrombocytopenic  
Purpura|C1268935|||C1268935|MSH;MTH|||  
TTP|DKFZp434C2322|C1413036|||C1413036|HUGO|||  
TTP|Deoxythymidine triphosphate|C0076582|||C0076582|SNOMEDCT|||  
TTP|Deoxythymidine triphosphate (substance)|||C0076582|SNOMEDCT|||  
TTP|Disease, Moschcowitz|C0034155|||C0034155|MSH|||  
TTP|Disease, Moschkowitz|C0034155|||C0034155|MSH|||  
TTP|FLJ42993|C1413036|||C1413036|HUGO|||  
TTP|Familial TTP/HUS|||C1268935|SNOMEDCT|||  
TTP|Familial Thrombotic Microangiopathies|C1268935|||C1268935|MSH|||  
TTP|Familial Thrombotic Microangiopathy|C1268935|||C1268935|MSH|||  
TTP|Familial thrombotic thrombocytopenic purpura / haemolytic uraemic  
syndrome|||C1268935|SNOMEDCT|||  
TTP|Familial thrombotic thrombocytopenic purpura / hemolytic uremic  
syndrome|||C1268935|SNOMEDCT|||  
TTP|G0S24|C1421571|||C1421571|HUGO|||  
TTP|MGC118899|C1413036|||C1413036|HUGO|||  
TTP|MGC118900|C1413036|||C1413036|HUGO|||  
TTP|MICROANGIOPATHIC HEMOLYTIC ANEMIA|C0221021;C1268935|||C1268935|OMIM|||  
TTP|MICROANGIOPATHIC HEMOLYTIC ANEMIA, CONGENITAL|C1268935|||C1268935|OMIM|||  
TTP|MOSCHCOWITZ SYNDROME|C0034155|||C0034155|DXP|||  
TTP|MOSCHKOWITZ DIS|||C0034155|MSH|||  
TTP|Microangiopathies, Familial Thrombotic|C1268935|||C1268935|MSH|||  
TTP|Microangiopathy, Familial Thrombotic|C1268935|||C1268935|MSH|||  
TTP|Moschcowitz Disease|C0034155|||C0034155|MSH;NDFRT|||  
TTP|Moschcowitz syndrome|C0034155|||C0034155|SNOMEDCT|||  
TTP|Moschcowitz's syndrome|C0034155|||C0034155|MTHICD9|||  
TTP|Moschkowitz Disease|C0034155|||C0034155|MSH;NDFRT|||  
TTP|Moschowitz Disease|C0034155|||C0034155|NCI|||  
TTP|Moschowitz's syndrome|C0034155;C2584778|||C0034155|SNOMEDCT|||  
TTP|NUP475|C1421571|||C1421571|HUGO|||  
TTP|PURPURA THROMBOPENIC THROMBOTIC|C0034155|||C0034155|CST|||  
TTP|PURPURA, THROMBOCYTOPENIC, THROMBOTIC|C0034155|||C0034155|DXP|||  
TTP|PURPURA, THROMBOHEMOLYTIC|C0034155|||C0034155|DXP|||  
TTP|Purpura, Thrombotic Thrombocytopenic|C0034155|||C0034155|MSH;MTH;NDFRT|||  
TTP|Purpura, Thrombotic Thrombocytopenic [Disease/Finding]|||C0034155|NDFRT|||  
TTP|Purpura, Thrombotic Thrombopenic|C0034155|||C0034155|MSH;NDFRT|||  
TTP|Purpuras, Thrombotic Thrombocytopenic|C0034155|||C0034155|MSH|||  
TTP|Purpuras, Thrombotic Thrombopenic|C0034155|||C0034155|MSH|||

TTP|RNF162A|C1421571|||C1421571|HUGO|||  
TTP|SCHULMAN-UPSHAW SYNDROME|C1268935|||C1268935|OMIM|||  
TTP|Schulman Upshaw Syndrome|C1268935|||C1268935|MSH|||  
TTP|Schulman-Upshaw Syndrome|C1268935|||C1268935|MSH|||  
TTP|Syndrome, Schulman-Upshaw|C1268935|||C1268935|MSH|||  
TTP|Syndrome, Upshaw-Schulman|C1268935|||C1268935|MSH|||  
TTP|THROMBOTIC MICROANGIOPATHY, FAMILIAL|C1268935|||C1268935|OMIM|||  
TTP|THROMBOTIC THROMBOCYTOPENIC PURPURA|C0034155|||C0034155|CST;QMR|||  
TTP|THROMBOTIC THROMBOCYTOPENIC PURPURA, CONGENITAL|C1268935|||C1268935|OMIM|||  
TTP|TIS11|C1421571|||C1421571|HUGO|||  
TTP|TRISTETRAPROLIN|C0084795;C1421571|||C1421571|OMIM|||  
TTP|TTP|C2985467|||C0034155;C0076582;C1268935;C1413036;C1421571;C2985467|DXP;HUG  
O;MSH;NCI;OMIM;SNOMEDCT|||  
TTP|TTP - Thrombotic thrombocytopenic purpura|C0034155|||C0034155|SNOMEDCT|||  
TTP|Testicular Tumor Panel|||1  
TTP|Thrombocytopenic Purpura, Thrombotic|C0034155|||C0034155|MSH|||  
TTP|Thrombocytopenic Purpuras, Thrombotic|C0034155|||C0034155|MSH|||  
TTP|Thrombopenic Purpura, Thrombotic|C0034155|||C0034155|MSH|||  
TTP|Thrombopenic Purpuras, Thrombotic|C0034155|||C0034155|MSH|||  
TTP|Thrombotic Microangiopathies, Familial|C1268935|||C1268935|MSH|||  
TTP|Thrombotic Microangiopathy, Familial|C1268935|||C1268935|MSH|||  
TTP|Thrombotic Thrombocytopenic Purpura|C0034155|||C0034155|COSTAR;MSH;NCI|||  
TTP|Thrombotic Thrombocytopenic Purpura, Congenital|C1268935|||C1268935|MSH|||  
TTP|Thrombotic Thrombocytopenic Purpuras|C0034155|||C0034155|MSH|||  
TTP|Thrombotic Thrombopenic Purpura|C0034155|||C0034155|MSH|||  
TTP|Thrombotic Thrombopenic Purpuras|C0034155|||C0034155|MSH|||  
TTP|Thrombotic thrombocytopenic  
purpura|C0034155|||C0034155|MTHICD9;NCI;SNOMEDCT|||  
TTP|Thrombotic thrombocytopenic purpura (disorder)|||C0034155|SNOMEDCT|||  
TTP|Thrombotic thrombocytopenic purpura [Ambiguous]|||C0034155|SNOMEDCT|||  
TTP|Thymidine triphosphate|C0076582|||C0076582|SNOMEDCT|||  
TTP|Time to Progression|C2985467|||C2985467|MTH;NCI|||  
TTP|Time to progression|C2985467|||1|0.1821|  
TTP|Tolpa Torf Preparation|C0248452|||1|0.0066|  
TTP|UPSHAW FACTOR, DEFICIENCY OF|||C1268935|OMIM|||  
TTP|UPSHAW-SCHULMAN SYNDROME|C1268935|||C1268935|OMIM|||  
TTP|USS|C1268935|||C1268935|OMIM|||  
TTP|Upshaw Factor, Deficiency of|||C1268935|MSH|||  
TTP|Upshaw Schulman Syndrome|C1268935|||C1268935|MSH|||  
TTP|Upshaw-Schulman Syndrome|C1268935|||C1268935|MSH|||  
TTP|Upshaw-Schulman syndrome|C1268935|||C1268935|SNOMEDCT|||  
TTP|Upshaw-Schulman syndrome (disorder)|||C1268935|SNOMEDCT|||  
TTP|VON WILLEBRAND FACTOR-CLEAVING PROTEASE|C0389918;C1413036|||C1413036|OMIM|||  
TTP|VWF|C1413036|||C1413036|HUGO;OMIM|||  
TTP|ZFP36|C1421571|||C1421571|HUGO;OMIM|||  
TTP|ZFP36 gene|C1421571|||C1421571|HUGO;MTH|||  
TTP|ZINC FINGER PROTEIN 36, MOUSE, HOMOLOG OF|||C1421571|OMIM|||  
TTP|dTTP|C0076582|||C0076582|MSH;SNOMEDCT|||  
TTP|deoxythymidine triphosphate|C0076582|||C0076582|MSH|||  
TTP|moschcowitz's syndrome|C0034155|||C0034155|CHV|||  
TTP|protein tristetraprolin|||1|0.0083|  
TTP|temporary transvenous pacemaker|||1  
TTP|tender to palpation|||1  
TTP|tender to pressure|||1  
TTP|thiamin triphosphate|C0039853|||1|0.0075|  
TTP|thiamine triphosphate|C0039853|||1|0.0108|

TTP|thrombotic thrombocytopenic  
purpura|C0034155|1|1.000|C0034155|COSTAR;CST;MSH;MTHICD9;NCI;QMR;SNOMEDCT|1|0.63  
41|1  
TTP|thrombotic thrombocytopenic purpura (TTP)|C0034155|||C0034155|CHV|||  
TTP|thrombotic thrombopenic purpura|C0034155|||C0034155|CHV|||  
TTP|thymidine 5'-(tetrahydrogen triphosphate)|||C0076582|MSH|||  
TTP|thymidine 5'-triphosphate|C0076582|||C0076582|MSH;MTH|||  
TTP|thymidine 5'-triphosphate (TTP)|||C0076582|CHV|||  
TTP|thymidine triphosphate|C0076582|||C0076582|CSP;MSH;SNOMEDCT|1|0.0099|1  
TTP|thyrototoxic paralysis|||1|1  
TTP|time to peak|C2923471|||C2923471|LNC|1|0.053|1  
TTP|time to peak contraction|||1|0.0066|  
TTP|time to peak tension|||1|0.0124|  
TTP|time to pregnancy|||1|0.0248|1  
TTP|time to progression|C2985467|||C2985467|NCI|||1  
TTP|time to tumor progression|||1|0.0439|1  
TTP|transtrabecular plane|||1|1  
TTP|transtuberular plane|C0458356|||1|1  
TTP|ttp|C2985467|||C0034155|CHV|||  
TTP|vWF-CP|C1413036|||C1413036|HUGO|||  
TTP|zinc finger protein 36, C3H type, homolog (mouse)|||C1421571|HUGO|||  
TURP|Endoscopic prostatectomy|C0040771|||C0040771|SNOMEDCT|||  
TURP|Endoscopic resection of prostate|C0040771|||C0040771|SNOMEDCT|||  
TURP|Loop prostatectomy|C0040771|||C0040771|SNOMEDCT|||  
TURP|Prostate Resection, Transurethral|C0040771|||C0040771|MSH|||  
TURP|Prostate Resections, Transurethral|C0040771|||C0040771|MSH|||  
TURP|Prostate Transurethral Resection|C0040771|||C0040771|MSH;NCI|||  
TURP|Prostate Transurethral Resections|C0040771|||C0040771|MSH|||  
TURP|Prostatectomies, Transurethral|C0040771|||C0040771|MSH|||  
TURP|Prostatectomy, Transurethral|C0040771|||C0040771|LCH;MSH|||  
TURP|Resection, Transurethral Prostate|C0040771|||C0040771|MSH|||  
TURP|Resections, Transurethral Prostate|C0040771|||C0040771|MSH|||  
TURP|TRANSURETHRAL PROSTATECTOMY|C0040771|||C0040771|COSTAR|||  
TURP|TUR of prostate|C0040771|||C0040771|SNOMEDCT|||  
TURP|TUR of prostate, NOS|C0040771|||C0040771|SNOMEDCT|||  
TURP|TURP|C0040771|||C0040771|MSH;MTHICD9;NCI|||  
TURP|TURP (transurethral resection of prostate gland)|||C0040771|CSP|||  
TURP|TURP - Transurethral resection of prostate|C0040771|||C0040771|SNOMEDCT|||  
TURP|TURPs|C0040771|||C0040771|MSH|||  
TURP|Transurethral Prostate Resection|C0040771|||C0040771|MSH|||  
TURP|Transurethral Prostate Resections|C0040771|||C0040771|MSH|||  
TURP|Transurethral Prostatectomies|C0040771|||C0040771|MSH|||  
TURP|Transurethral Prostatectomy|C0040771|||C0040771|MSH;NCI|||  
TURP|Transurethral Prostatic Resection|C0040771|||C0040771|NCI|||  
TURP|Transurethral Resection of Prostate|C0040771|||C0040771|MSH;MTH;NCI|||  
TURP|Transurethral Resection of the Prostate|C0040771|||C0040771|NCI|||  
TURP|Transurethral prostatectomy|C0040771|||C0040771|ICD9CM;SNOMEDCT|||  
TURP|Transurethral prostatectomy (procedure)|||C0040771|SNOMEDCT|||  
TURP|Transurethral prostatectomy NOS|C0040771|||C0040771|MTHICD9|||  
TURP|Transurethral prostatectomy, NOS|C0040771|||C0040771|SNOMEDCT|||  
TURP|Transurethral resection of prostate|C0040771|||C0040771|MTHICD9;SNOMEDCT|||  
TURP|Transurethral resection of prostate (TURP)|C0040771|||C0040771|CCS|||  
TURP|transurethral prostate resection|C0040771|||1|0.02|  
TURP|transurethral prostatectomy|C0040771|||C0040771|CHV|1|0.112|  
TURP|transurethral prostatic resection|C0040771|||1|0.0248|  
TURP|transurethral resection|C1519630|||1|0.0483|  
TURP|transurethral resection of prostate|C0040771|1|1.000|||1|1

TURP|transurethral resection of prostate (TURP)|C0040771|||C0040771|CHV|||  
TURP|transurethral resection of the prostate|C0040771|||C0040771|NCI|1|0.7948|  
TURP|turp|C0040771|||C0040771|CHV|||  
TV|Ellice Islands|C0041413|||C0041413|MSH|||  
TV|TUV|C0041413|||C0041413|NCI|||  
TV|TUVALU|C0041413|||C0041413|NCI|||  
TV|TV|||C0039461;C0041413;C1704705|AOD;NCI|||  
TV|Tacaribe virus|C1304600|||1|0.0235|  
TV|Television|C0039461|||C0039461|LCH;MSH;MTH;SNOMEDCT|||  
TV|Television (physical object)|||C0039461|SNOMEDCT|||  
TV|Televisions|C0039461|||C0039461|MSH|||  
TV|Tellina virus|C1653138|||1|  
TV|Thermoactinomyces vulgaris|C0318210|||1|  
TV|Trial Visits|||C1704705|NCI|||  
TV|Trial Visits Domain|||C1704705|MTH;NCI|||  
TV|Trichomonas vaginalis|C0040922|||1|0.1373|1  
TV|Tuvala|C0041413|||C0041413|SNOMEDCT|||  
TV|Tuvala (geographic location)|||C0041413|SNOMEDCT|||  
TV|Tuvalu|C0041413|||C0041413|AOD;MSH;MTH;NCI;SNOMEDCT|||  
TV|t.v.|C0039461;C0040210|||C0039461|AOD|||  
TV|talipes varus|C0158722|||1|  
TV|target volume|||1|  
TV|television|C0039461|||C0039461|AOD;CHV;CSP|1|0.2549|1  
TV|televisions|C0039461|||C0039461|CHV|||  
TV|temporary visit|||1|  
TV|tetrazolium violet|C2603970|||1|  
TV|thoracic vertebra|C0039987;C1269050|||1|  
TV|thyroid volume|||1|  
TV|tick-borne virus|C0206549|||1|  
TV|tidal volume|C0040210|1|0.014|||1|0.251|1  
TV|tonic vergence|||1|  
TV|total volume|||1|  
TV|toxic vertigo|||1|  
TV|transfer vesicle|||1|  
TV|transvaginal|C0175672|||1|0.051|1  
TV|transvenous|C0522521|||1|  
TV|transverse|C0205106;C0446380|||1|  
TV|trial visit|||1|  
TV|tricuspid valve|C0040960;C1269006|||1|0.1843|1  
TV|trivalent|||1|  
TV|true vertebra|||1|  
TV|truncal vagotomy|C0042275|||1|0.098|1  
TV|tuberculin volutin|||1|  
TV|tubulovesicular|||1|  
TV|tumor virus|C0029017|||1|  
TV|tv|||C0039461|CHV|||  
TV|typhoid vaccine|C0041469|||1|  
UA|Laboratory: urine examination|||C0042014|AIR|||  
UA|UA|C0041580;C0042014|||C0041580;C0042014|LNC;NCI|||  
UA|UKR|C0041580|||C0041580|NCI|||  
UA|UKRAINE|C0041580|||C0041580|NCI|||  
UA|UP|||C0041580|NCI|||  
UA|Ukraine|C0041580|||C0041580|AOD;CSP;LCH;MSH;MTH;NCI;SNOMEDCT|||  
UA|Ukraine (geographic location)|||C0041580|SNOMEDCT|||  
UA|Ulex agglutinin|||1|  
UA|Urinalyses|C0042014|||C0042014|MSH|||  
UA|Urinalysis|C0042014|||C0042014|LNC;MSH;MTH;NCI;SNOMEDCT|||

UA|Urinalysis (procedure)|C0042014|||C0042014|SNOMEDCT|||  
UA|Urinalysis - general|||C0042014|SNOMEDCT|||  
UA|Urinalysis Procedures|C0042014|||C0042014|MTHCH|||  
UA|Urinalysis procedure|C0042014|||C0042014|SNOMEDCT|||  
UA|Urinalysis procedure, NOS|C0042014|||C0042014|SNOMEDCT|||  
UA|Urinalysis studies|||C0042014|LNC|||  
UA|Urinalysis, NOS|C0042014|||C0042014|SNOMEDCT|||  
UA|Urine exam. - general|C0205246;C1553889|||C0042014|SNOMEDCT|||  
UA|Urine exam. - general NOS|C0205246;C1553889|||C0042014|SNOMEDCT|||  
UA|Urine exam. - general NOS (procedure)|||C0042014|SNOMEDCT|||  
UA|Urine examination|C0042014|||C0042014|SNOMEDCT|||  
UA|Urine examination (procedure)|||C0042014|SNOMEDCT|||  
UA|Urine examination - general|||C0042014|SNOMEDCT|||  
UA|Urine examination - general (procedure)|||C0042014|SNOMEDCT|||  
UA|Urine examination - general NOS|||C0042014|SNOMEDCT|||  
UA|Urine examination - general NOS (procedure)|||C0042014|SNOMEDCT|||  
UA|Urine test|C0042014;C1263430|||C0042014|SNOMEDCT|||  
UA|Urine test NOS|C0042014;C1263430|||C0042014|SNOMEDCT|||  
UA|Urine test NOS (procedure)|C0042014|||C0042014|SNOMEDCT|||  
UA|activity|C0026606;C0205177;C0439167;C0441655;C1561536|||1|0.0105|  
UA|aldosterone|C0002006|||1|0.0105|  
UA|analysis urine|C0042014|||C0042014|CHV|||  
UA|examination urine|C0042014|||C0042014|CHV|||  
UA|general urine exam|C0042014|||C0042014|CHV|||  
UA|procedures test urine|||C0042014|CHV|||  
UA|test urine|C0042014|||C0042014|CHV|||  
UA|tested urine|C0042014|||C0042014|CHV|||  
UA|testing urine|C0042014|||C0042014|CHV|||  
UA|testings urine|C0042014|||C0042014|CHV|||  
UA|tests urine|||C0042014|CHV|||  
UA|ukraine|C0041580|||C0041580|CHV|||  
UA|ultraaudible|||1|  
UA|ultrasonic arteriogram|||1|  
UA|ultrasonic arteriograph|||1|  
UA|ultrasonic arteriography|||1|  
UA|umbilical arterial|||1|0.0233|  
UA|umbilical  
artery|C0041632;C1280618|||C0041632;C1280618|CHV;FMA;LNC;MSH;NCI;SNOMEDCT;UWDA|1  
|0.1826|1  
UA|unaggregated|||1|  
UA|unauthorized absence|||1|  
UA|uncertain about|||1|  
UA|undifferentiated arthritis|||1|0.0198|  
UA|unicystic ameloblastoma|C0457521|||1|  
UA|unit of analysis|||1|  
UA|unrelated apart|||1|  
UA|unstable  
angina|C0002965|||C0002965|CHV;MSH;MTHICD9;NCI;NDFRT;SNOMEDCT|1|0.2814|1  
UA|unstable angina pectoris|C0002965|||1|0.0105|  
UA|upper airway|||1|0.1163|  
UA|upper airways|||1|  
UA|upper arm|C0446516;C1269612|||C0446516;C1269612|AOD;CHV;LNC;MTH;SNOMEDCT|||1  
UA|uranyl acetate|C0077854|||C0077854|MSH|1|0.0174|  
UA|urethra|C0041967;C1281574;C1550675|||1|  
UA|uric  
acid|C0041980;C0202239|||C0041980;C0202239|AOD;CHV;LCH;MSH;MTH;NCI;NDFRT;SNOMEDC  
T|1|0.286|1

UA|uridylic acid|C0042002|||C0042002|CHV;MSH;NDFRT;SNOMEDCT|||  
UA|urinalyses|C0042014|||C0042014|CHV|||  
UA|urinalysis|C0042014|1|1.000|C0042014|AOD;CHV;CSP;LNC;MSH;MTH;NCI;SNOMEDCT|1|0.0174|1  
UA|urinalysys|||C0042014|CHV|||  
UA|urinary aldosterone|C0852887|||C0852887|CHV|||1  
UA|urinary amylase|||1|0.0128|  
UA|urine aliquot|||1  
UA|urine analysisi|||C0042014|CHV|||  
UA|urine analysis|C0042014|||C0042014|AOD;CHV|||  
UA|urine examination|C0042014|||C0042014|CHV|||  
UA|urine test|C0042014;C1263430|||C0042014|CHV|||  
UA|urine test procedure|C0042014|||C0042014|CHV|||  
UA|urocanic acid|C0042054|||1  
UA|uronic acid|C0042081|||C0042081|SNOMEDCT|||  
UA|ursolic acid|C0077938|||C0077938|CHV;MSH|||  
UA|uterine arteries|C0226378|||1|0.0116|  
UA|uterine artery|C0226378;C1280153|||C0226378;C1280153|CHV;FMA;LNC;MSH;SNOMEDCT;UWDA|||1  
UA|uterine aspiration|||1  
UC|Uldall catheter|||1  
UC|University of California|||1|0.0607|  
UC|controls|||1|0.0364|  
UC|ulcerative colitis|C0009324|1|0.016|C0009324|AIR;AOD;CHV;COSTAR;CSP;CST;ICD9CM;MEDLINEPLUS;MSH;MTH;NCI;NDFRT;OMIM;QMR;SNOMEDCT|1|0.0364|1  
UC|ultracentrifugal|||1  
UC|ultracentrifugation|C0041609|||C0041609|AOD;CSP;MSH;SNOMEDCT|1|0.0526|  
UC|umbilical cholesterol|||1  
UC|umbilical cord|C0041633;C1281286|||C0041633;C1281286|AOD;CHV;CSP;FMA;LCH;LNC;MSH;NCI;SNOME DCT|1|0.1377|1  
UC|unchanged|C0442739;C2346711|||1  
UC|unclassifiable|||1  
UC|unconscious|C0041657|||1  
UC|undifferentiated carcinoma|C0205698|||C0205698|CHV;MSH;MTH;NCI;SNOMEDCT|1|0.0486|1  
UC|undifferentiated cells|||1  
UC|unesterified cholesterol|C0368909|||C0368909|SNOMEDCT|1|0.17|  
UC|unfixed cryostat|||1  
UC|universal coverage|C0376640|||C0376640|MSH|||  
UC|unsatisfactory condition|||1  
UC|untreated cell|||1  
UC|urea clearance|C0428604;C1318428|||1  
UC|urethral catheter|C0179800|||1  
UC|urethral catheterization|C0042019;C1455681|||1  
UC|urgent care|C1552460;C2362545|1|0.002|1  
UC|urinary catheter|C0179802|||1  
UC|urinary catheterization|C0042019|||1  
UC|urine concentrate|||1  
UC|urine culture|C0430404|1|0.974|1  
UC|urothelial carcinoma|C0007138|||C0007138|CHV;NCI;SNOMEDCT|1|0.0526|  
UC|usual care|||1|0.3563|1  
UC|uterine contraction|C0042130|||C0042130|CHV;DXP;MSH;NCI;SNOMEDCT|||1  
UC|uterine contractions|C0042130|||1|0.0486|  
URI|C19orf2|C1421895|||C1421895|HUGO|||  
URI|C19orf2 gene|C1421895|||C1421895|HUGO;MTH|||

URI|FLJ10575|C1421895|||C1421895|HUGO|||  
URI|INFECT UPPER RESPIRATORY|||C0041912|MSH|||  
URI|INFECTION UPPER RESPIRATORY|C0041912|||C0041912|CST|||  
URI|INFECTION, UPPER RESPIRATORY TRACT|C0041912|||C0041912|NCI|||  
URI|Infection of the upper respiratory tract|C0041912|||C0041912|SNOMEDCT|||  
URI|Infection of the upper respiratory tract (disorder)|||C0041912|SNOMEDCT|||  
URI|Infections, Upper Respiratory|C0041912|||C0041912|MSH|||  
URI|Infections, Upper Respiratory Tract|C0041912|||C0041912|MSH|||  
URI|NNX3|C1421895;C1708129|||C1421895|HUGO;OMIM|||  
URI|NNX3 PROTEIN|C1421895|||C1421895|OMIM|||  
URI|RMP|C1412063;C1421895;C1708129|||C1421895|HUGO;OMIM|||  
URI|RNA POLYMERASE II, SUBUNIT 5-MEDIATING PROTEIN|||C1421895|OMIM|||  
URI|RPB5-MEDIATING PROTEIN|||C1421895|OMIM|||  
URI|Respiratory Infection, Upper|C0041912|||C0041912|MSH|||  
URI|UNCONVENTIONAL PREFOLDIN RPB5 INTERACTOR|C1421895|||C1421895|OMIM|||  
URI|UPPER RESP TRACT INFECTION|C0041912|||C0041912|CST|||  
URI|UPPER RESPIRATORY INFECT|||C0041912|MSH|||  
URI|UPPER RESPIRATORY INFECTION|C0041912|||C0041912|COSTAR;DXP|||  
URI|URI|C0041912;C1421895;C1548524|||C0041912;C1421895;C1548524|DXP;HUGO;NCI;OMI  
M|||  
URI|URI - Upper respiratory infection|C0041912|||C0041912|SNOMEDCT|||  
URI|URTI- Infection of the upper respiratory  
tract|C0041912|||C0041912|SNOMEDCT|||  
URI|Uniform Resource Identifier|C1548524|||C1548524|HL7V2.5;MTH;NCI|||  
URI|Upper Respiratory Infections|C0041912|||C0041912|MSH;MTH|||  
URI|Upper Respiratory Tract Infection|C0041912|||C0041912|NCI|||  
URI|Upper Respiratory Tract Infections|C0041912|||C0041912|MSH|||  
URI|Upper respiratory infection|C0041912|||C0041912|MTHICD9;NCI;SNOMEDCT|||  
URI|Upper respiratory infection (disorder)|||C0041912|SNOMEDCT|||  
URI|Upper respiratory infection NOS|C0041912|||C0041912|SNOMEDCT|||  
URI|Upper respiratory infection NOS (disorder)|||C0041912|SNOMEDCT|||  
URI|Upper respiratory infection, NOS|C0041912|||C0041912|SNOMEDCT|||  
URI|Upper respiratory tract infection|C0041912|||C0041912|SNOMEDCT|||  
URI|Upper respiratory tract infection NOS|C0041912|||C0041912|SNOMEDCT|||  
URI|Upper respiratory tract infections|C0041912|||C0041912|OMIM|||  
URI|chromosome 19 open reading frame 2|C1421895|||C1421895|HUGO|||  
URI|common cold|C0009443;C0041912|||C0041912|CHV|||  
URI|unconventional prefoldin RPB5 interactor|C1421895|||C1421895|HUGO|||  
URI|upper respiratory illness|||1|0.0857|  
URI|upper respiratory  
infection|C0041912|1|1.000|C0041912|CHV;COSTAR;DXP;MTHICD9;NCI;SNOMEDCT|1|0.5357  
|1  
URI|upper respiratory infection (URI)|C0041912|||C0041912|CHV|||  
URI|upper respiratory infections|C0041912|||C0041912|CHV|||  
URI|upper respiratory tract infection|C0041912|||C0041912|NCI;SNOMEDCT|1|0.3786|  
URI|upper respiratory tract infection (URTI)|C0041912|||C0041912|CHV|||  
US|California|C0006754;C0324542;C3146274|||1|0.0015|  
US|Diagnosis (US)|||C0041618|NCI|||  
US|Diagnosis, Ultrasound|C0041618|||C0041618|NCI|||  
US|Diagnostic Ultrasound|||C0041618|NCI|||  
US|Diagnostic Ultrasound Procedures|||C0041618|MTHCH|||  
US|Diagnostic sonar|||C0041618|SNOMEDCT|||  
US|Diagnostic ultrasonography|||C0041618|SNOMEDCT|||  
US|Diagnostic ultrasonography (procedure)|||C0041618|SNOMEDCT|||  
US|Diagnostic ultrasonography, NOS|||C0041618|SNOMEDCT|||  
US|Diagnostic ultrasound|||C0041618|CCS;ICD9CM|||  
US|ECHOGR|||C0041618|MSH|||

US|ECHOTOMOGR|||C0041618|MSH|||  
US|Echography|C0041618;C0175676||C0041618|MSH;SNOMEDCT|||  
US|Echography (procedure)|||C0041618|SNOMEDCT|||  
US|Echography, NOS|C0041618;C0175676||C0041618|SNOMEDCT|||  
US|Echotomographies|C0041618||C0041618|MSH|||  
US|Echotomography|C0041618;C0175676||C0041618|MSH|||  
US|GEN.US|||C0041618|LNC|||  
US|General ultrasound|C0041618||C0041618|LNC|||  
US|Imaging, Ultrasonic|C0041618||C0041618|MSH|||  
US|Imagings, Ultrasonic|C0041618||C0041618|MSH|||  
US|Medical Imaging, Ultrasound|C0041618||C0041618|NCI|||  
US|Medical Sonography|C0041618||C0041618|MSH|||  
US|Microsecond|C0439224||C0439224|MTH;NCI|||  
US|Sonogram|C0041618||C0041618|MEDLINEPLUS;NCI|||  
US|Sonography, Medical|C0041618||C0041618|MSH|||  
US|U S|C0041703||C0041703|CHV|||  
US|U.S.|C0041703||C0041703|AOD;CHV|||  
US|U.S.A.|||C0041703|AOD|||  
US|ULTRASONOGR|||C0041618;C0175676|MSH|||  
US|ULTRASOUND|C0041618;C0041621;C0220934;C1456803;C1875843||C0041618|NCI|||  
US|UNITED STATES|C0041703||C0041703|NCI|||  
US|US|||C0041618;C0041703;C0175676|AOD;LNC;MSH;NCI|||  
US|US - Ultrasound|C0041618||C0041618|SNOMEDCT|||  
US|USA|C0041703||C0041703|NCI|||  
US|USA - United States of America|C0041703||C0041703|SNOMEDCT|||  
US|USS - Ultrasound scan|C0041618||C0041618|SNOMEDCT|||  
US|Ultrasonic Imaging|C0041618||C0041618|MSH|||  
US|Ultrasonic Imagings|C0041618||C0041618|MSH|||  
US|Ultrasonogram|C0041618||C0041618|NCI;SNOMEDCT|||  
US|Ultrasonography|C0041618;C0162481;C0175676||C0041618|MSH;MTH;NCI;SNOMEDCT|||  
US|Ultrasonography (procedure)|||C0041618|SNOMEDCT|||  
US|Ultrasonography, NOS|C0041618;C0162481;C0175676||C0041618|SNOMEDCT|||  
US|Ultrasound|C0041618;C0041621;C0220934;C1456803;C1875843||C0041618|HL7V2.5;HL7V3.0;MEDLINEPLUS;NCI;SNOMEDCT|||  
US|Ultrasound Imaging|C0701813||C0041618|NCI|||  
US|Ultrasound Test|C0041618||C0041618|NCI|||  
US|Ultrasound diagnostic procedure|||C0041618|SNOMEDCT|||  
US|Ultrasound diagnostic procedure (procedure)|||C0041618|SNOMEDCT|||  
US|Ultrasound procedure|C0041618||C0041618|SNOMEDCT|||  
US|Ultrasound procedure (procedure)|||C0041618|SNOMEDCT|||  
US|Ultrasound procedure, NOS|C0041618||C0041618|SNOMEDCT|||  
US|Ultrasound scan|C0041618||C0041618|SNOMEDCT|||  
US|Ultrasound scan (procedure)|||C0041618|SNOMEDCT|||  
US|Ultrasound scan, NOS|C0041618||C0041618|SNOMEDCT|||  
US|Ultrasound, Medical|C0041618||C0041618|NCI|||  
US|United States|C0041703|1|0.804|C0041703|AOD;CHV;CSP;HL7V3.0;LCH;MSH;MTH;NCI|1|0.0523|  
US|United States of America|C0041703||C0041703|NCI;SNOMEDCT|1|0.0015|  
US|United States of America (geographic location)|||C0041703|SNOMEDCT|||  
US|Usher syndrome|C0271097|||1|0.0011|  
US|diagnostic ultrasound|||C0041618|CHV;CSP|||  
US|diagnostics ultrasound|C0041618||C0041618|CHV|||  
US|echographies|C0041618||C0041618|CHV|||  
US|echography|C0041618;C0175676||C0041618;C0175676|AOD;CHV;MSH|||  
US|echotomography|C0041618;C0175676||C0041618;C0175676|CHV;MSH|||  
US|imaging ultrasound|C0041618;C0701813||C0041618|CHV|||  
US|microsecond|C0439224||C0439224|SNOMEDCT|||

US|procedure ultrasound|C0041618|||C0041618|CHV|||  
US|scan ultrasound|C0041618|||C0041618|CHV|||  
US|scans ultrasound|||C0041618|CHV|||  
US|short unique|||1|0.0021|  
US|sonogram|C0041618|||C0041618|CHV;CSP;NCI|||  
US|sonograms|C0041618|||C0041618|CHV|||  
US|sonographic|||1|0.0055|  
US|sonography|C0041618|||C0041618|AOD;CHV;CSP|1|0.0165|  
US|sound measurement|C0041618|||C0041618|CHV;CSP|||  
US|testing ultrasound|C0041618|||C0041618|CHV|||  
US|tests ultrasound|||C0041618|CHV|||  
US|u s a|||C0041703|CHV|||  
US|u.s.a.|||C0041703|CHV|||  
US|ultrasonic|C0220934;C1456803|||C0220934;C1456803|MSH;MTH|1|0.0062|1  
US|ultrasonic diagnosis|C0080351;C0175676|||C0175676|MSH;MTH|||  
US|ultrasonic imaging|C0041618|||C0041618|CHV|||  
US|ultrasonogram|C0041618|||C0041618|CHV;NCI|||  
US|ultrasonograph|||1|  
US|ultrasonographic|||1|0.0502|  
US|ultrasonographically|||1|0.0032|  
US|ultrasonography|C0041618;C0162481;C0175676|||C0041618;C0162481;C0175676|AOD;C  
HV;CSP;MSH;MTH;NCI;PDQ;SNOMEDCT|1|0.3175|1  
US|ultrasound|C0041618;C0041621;C0220934;C1456803;C1875843|1|0.188|C0041618;C004  
1621;C0220934;C1456803;C1875843|AOD;CHV;CSP;HL7V2.5;HL7V3.0;MEDLINEPLUS;MSH;NCI;  
NDFRT;SNOMEDCT;VANDF|1|0.4581|1  
US|ultrasound diagnostic|||C0041618|CHV|||  
US|ultrasound diagnostic procedure|||C0041618|CHV|||  
US|ultrasound examination|C0948501|||1|0.0021|  
US|ultrasound imaging|C0701813|||C0041618|CHV;CSP|1|0.0013|  
US|ultrasound imaging/scanning|||C0041618|CSP|||  
US|ultrasound procedure|C0041618|||C0041618|CHV|||  
US|ultrasound scan|C0041618|||C0041618|CHV;SNOMEDCT|1|0.0032|  
US|ultrasound scanning|C0041618|||C0041618|AOD;CHV;CSP|1|0.0018|  
US|ultrasound test|C0041618|||C0041618|CHV|||  
US|ultrasounded|||C0041618|CHV|||  
US|ultrasounding|||C0041618|CHV|||  
US|ultrasounds|C0041618|||C0041618|CHV|||  
US|unconditioned stimulus|C0234403|||C0234403|AOD;CHV;MTH;SNOMEDCT|1|0.0703|1  
US|undetermined significance|C1272585|||C1272585|CHV|||  
US|unique short|||1|0.0057|  
US|upper segment|C0442063|||1|  
US|urinary sugar|C0017979|||1|  
US|urine specimen|C0444180|||1|  
US|us|||C0439224|NCI;SNOMEDCT|||  
US|us (qualifier value)|||C0439224|SNOMEDCT|||  
US|use of ultrasonography|C0175676|||C0175676|MTH|||  
UTI|A1M|C1412376|||C1412376|OMIM|||  
UTI|ALPHA-1 MICROGLOBULIN|C0051266;C1412376|||C1412376|OMIM|||  
UTI|ALPHA-1 MICROGLOBULIN/BIKUNIN PRECURSOR|||C1412376|OMIM|||  
UTI|AMBP|C1412376|||C1412376|HUGO;OMIM|||  
UTI|AMBP gene|C1412376|||C1412376|HUGO;MTH|||  
UTI|BIKUNIN|C0051266;C1412376|||C1412376|OMIM|||  
UTI|COMPLEX-FORMING GLYCOPROTEIN HETEROGENEOUS IN CHARGE|||C1412376|OMIM|||  
UTI|EDC1|C1412376|||C1412376|HUGO|||  
UTI|HCP|C2985545|||C1412376|HUGO;OMIM|||  
UTI|HI30|C1412376|||C1412376|HUGO|||  
UTI|IATIL|C1412376;C1867668|||C1412376|HUGO|||

UTI|INFECTION URINARY TRACT|C0042029|||C0042029|CST|||  
UTI|INFECTION, URINARY TRACT|C0042029|||C0042029|NCI|||  
UTI|ITILC|C1412376|||C1412376|HUGO|||  
UTI|Infection - urinary NOS|||C0042029|SNOMEDCT|||  
UTI|Infection of urinary tract|C0042029|||C0042029|SNOMEDCT|||  
UTI|Infection, Urinary Tract|C0042029|||C0042029|MSH|||  
UTI|Infections, Urinary Tract|C0042029|||C0042029|MSH|||  
UTI|PROTEIN HC|C0051266;C1412376|||C1412376|OMIM|||  
UTI|TRACT, INFECTION OF URINARY|||C0042029|NCI|||  
UTI|Tract Infection, Urinary|C0042029|||C0042029|MSH|||  
UTI|Tract Infections, Urinary|C0042029|||C0042029|MSH|||  
UTI|URINARY TRACT INFECT|||C0042029|MSH|||  
UTI|URINARY TRACT INFECTION|C0042029|||C0042029|COSTAR;CST;DXP;NCI|||  
UTI|UTI|C0042029;C1412376|||C0042029;C1412376|CHV;DXP;HUGO;MEDLINEPLUS|||  
UTI|UTI - Urinary tract infection|C0042029|||C0042029|SNOMEDCT|||  
UTI|Urin tract infection NOS|||C0042029|ICD9CM|||  
UTI|Urinary Tract Infection|C0042029|||C0042029|MSH;NCI|||  
UTI|Urinary Tract Infections|C0042029|||C0042029|COSTAR;MEDLINEPLUS;MSH;NDFRT|||  
UTI|Urinary Tract Infections [Disease/Finding]|||C0042029|NDFRT|||  
UTI|Urinary infection NOS|C0042029|||C0042029|SNOMEDCT|||  
UTI|Urinary infection NOS (disorder)|||C0042029|SNOMEDCT|||  
UTI|Urinary tract infection|C0042029|||C0042029|MTH;NCI;SNOMEDCT|||  
UTI|Urinary tract infection (& [NOS])|||C0042029|SNOMEDCT|||  
UTI|Urinary tract infection (& [NOS]) (disorder)|||C0042029|SNOMEDCT|||  
UTI|Urinary tract infection NOS|C0042029|||C0042029|SNOMEDCT|||  
UTI|Urinary tract infection, NOS|C0042029|||C0042029|SNOMEDCT|||  
UTI|Urinary tract infection, site not specified|||C0042029|ICD9CM;SNOMEDCT|||  
UTI|Urinary tract infection, site not specified NOS|||C0042029|SNOMEDCT|||  
UTI|Urinary tract infection, site not specified NOS  
(disorder)|||C0042029|SNOMEDCT|||  
UTI|Urinary tract infection; site not specified|C0042029|||C0042029|CCS|||  
UTI|Urinary tract infections|C0042029|||C0042029|CCS;LCH;OMIM|||  
UTI|Urinary tract infectious disease|C0042029|||C0042029|SNOMEDCT|||  
UTI|Urinary tract infectious disease (disorder)|||C0042029|SNOMEDCT|||  
UTI|Urinary tract infectious disease, NOS|C0042029|||C0042029|SNOMEDCT|||  
UTI|alpha-1-microglobulin/bikunin precursor|||C1412376|HUGO|||  
UTI|bikunin|C0051266;C1412376|||C1412376|HUGO|||  
UTI|complex-forming glycoprotein heterogeneous in charge|||C1412376|HUGO|||  
UTI|growth-inhibiting protein 19|||C1412376|HUGO|||  
UTI|inter-alpha-trypsin inhibitor light chain|C1412376|||C1412376|HUGO|||  
UTI|protein HC|C0051266;C1412376|||C1412376|HUGO|||  
UTI|trypstatin|C1412376|||C1412376|HUGO|||  
UTI|ulinastatin|C0077906|||1|0.0075|  
UTI|urinary infection|C0042029|||C0042029|CHV|||  
UTI|urinary tract|C0042027;C1508753|||1|0.0063|  
UTI|urinary tract  
infection|C0042029|1|1.000|C0042029|CHV;COSTAR;CSP;CST;DXP;MSH;MTH;NCI;SNOMEDCT|  
1|0.9204|1|  
UTI|urinary tract infection (UTI)|C0042029|||C0042029|CHV|||  
UTI|urinary tract infections|C0042029|||C0042029|CHV|||  
UTI|urinary trypsin inhibitor|C0077906|||C0077906|MSH|1|0.0658|1|  
UTI|uristatin|C1412376|||C1412376|HUGO|||  
UTI|uronic-acid-rich protein|C1412376|||C1412376|HUGO|||  
UTI|uti|C0042029;C1412376|||C0042029|RAM|||  
UTI|utis|C0042029|||C0042029|CHV|||  
VAC|ACO|||C0054889|NCI;PDQ|||  
VAC|CAV|||C0054889|PDQ|||

VAC|CAV chemotherapy protocol|C0054889|||C0054889|CHV|||  
VAC|CAV protocol|C0054889|||C0054889|MSH|||  
VAC|CDV|||C0054889|NCI;PDQ|||  
VAC|CHO|||C0054889|NCI;PDQ|||  
VAC|CTX/DACT/VBL|||C0280063|NCI;PDQ|||  
VAC|CTX/DACT/VCR|||C0077964|NCI;PDQ|||  
VAC|CTX/DOX/VBL|||C0280062|NCI;PDQ|||  
VAC|CTX/DOX/VCR|||C0054889|NCI;PDQ|||  
VAC|CVA|C0038454|||C0054889|NCI;PDQ|||  
VAC|Cyclophosphamide/Dactinomycin/Vinblastine|||C0280063|NCI|||  
VAC|Cyclophosphamide/Dactinomycin/Vincristine|||C0077964|NCI|||  
VAC|Cyclophosphamide/Doxorubicin/Vinblastine|||C0280062|NCI|||  
VAC|Cyclophosphamide/Doxorubicin/Vincristine|||C0054889|NCI|||  
VAC|OCA|C1015366|||C0054889|NCI;PDQ|||  
VAC|VA-C|C0054889|||C0054889|NCI;PDQ|||  
VAC|VAC|||C0054889;C0077964;C0280062;C0280063|NCI;PDQ|||  
VAC|VAC (CTX/DACT/VCR)|||C0077964|NCI;PDQ|||  
VAC|VAC protocol|C0077964|||C0077964|MSH|||  
VAC|VADRC|C0054889|||C0054889|NCI;PDQ|||  
VAC|cyclophosphamide/dactinomycin/vinblastine|||C0280063|PDQ|||  
VAC|cyclophosphamide/dactinomycin/vinblastine protocol|||C0280063|MTH|||  
VAC|cyclophosphamide/dactinomycin/vincristine|||C0077964|PDQ|||  
VAC|cyclophosphamide/dactinomycin/vincristine  
protocol|C0077964|||C0077964|MTH|||  
VAC|cyclophosphamide/doxorubicin/vinblastine|||C0280062|PDQ|||  
VAC|cyclophosphamide/doxorubicin/vinblastine protocol|||C0280062|MTH|||  
VAC|cyclophosphamide/doxorubicin/vincristine|||C0054889|PDQ|||  
VAC|cyclophosphamide/doxorubicin/vincristine protocol|C0054889|||C0054889|MTH|||  
VAC|vaccine|C0042210;C1552558|||1|  
VAC|vaccinia virus|C0042216|||1|0.3559|  
VAC|vacuum|C0042221|||1|  
VAC|vacuum-assisted closure|C1956080|1|1.000||1|0.5593|1  
VAC|ventriculoarterial connection|||1|  
VAC|ventriculoatrial condition|||1|  
VAC|ventriculoatrial conduction|||1|0.0847|1  
VAD|DM/DOX/VCR|||C0077973|NCI;PDQ|||  
VAD|Dexamethasone/Doxorubicin/Vincristine|||C0077973|NCI|||  
VAD|VAD|C0077973|||C0077973|NCI;PDQ|||  
VAD|VAD I protocol|C0077973|||C0077973|MSH|||  
VAD|Vibroacoustic disease|||1|0.049|  
VAD|dexamethasone/doxorubicin/vincristine|||C0077973|PDQ|||  
VAD|vascular access device|C0184269|1|0.026|C0184269|CHV|||1  
VAD|vascular access dressing|||1|  
VAD|vascular atherosclerotic disease|||1|0.0232|  
VAD|vascular dementia|C0011269|||C0011269|CHV;ICD9CM;MSH;NCI;NDFRT;SNOMEDCT|||1  
VAD|venous access device|||1|  
VAD|ventricular assist device|C0179926|1|0.174|C0179926|CHV;SNOMEDCT|1|0.5747|1  
VAD|vertebral artery  
dissection|C0338586|||C0338586|CHV;MSH;NDFRT;SNOMEDCT|1|0.0361|1  
VAD|vincristine adriamycin and dexamethasone||1|0.792|||1|  
VAD|vincristine-Adriamycin-dexamethasone|||1|0.0284|  
VAD|virus-adjusting diluent|||1|  
VAD|vitamin A deficiency|C0042842|||1|0.1624|1  
VAD|vitamin A-deficient|||1|0.1263|  
VATS|Surgeries, Video-Assisted Thoracic|||C0752151|MSH|||  
VATS|Surgeries, Video-Assisted Thoracoscopic|||C0752151|MSH|||  
VATS|Surgery, Thoracic, Video-Assisted|C0752151|||C0752151|MSH|||

VATS|Surgery, Video-Assisted Thoracic|C0752151|||C0752151|MSH|||  
VATS|Surgery, Video-Assisted Thoracoscopic|||C0752151|MSH|||  
VATS|Thoracic Surgeries, Video-Assisted|||C0752151|MSH|||  
VATS|Thoracic Surgery, Video Assisted|C0752151|||C0752151|MSH|||  
VATS|Thoracic Surgery, Video-Assisted|C0752151|||C0752151|MSH|||  
VATS|Thoracoscopic Surgeries, Video-Assisted|||C0752151|MSH|||  
VATS|Thoracoscopic Surgery, Video-Assisted|||C0752151|MSH|||  
VATS|VATS|C0752151|||C0752151|MSH;NCI|||  
VATS|VATSs|C0752151|||C0752151|MSH|||  
VATS|Video Assisted Thoracic Surgery|C0752151|||C0752151|MSH|||  
VATS|Video Assisted Thoracoscopic Surgery|||C0752151|MSH|||  
VATS|Video-Assisted Thoracic Surgeries|||C0752151|MSH|||  
VATS|Video-Assisted Thoracic Surgery|C0752151|||C0752151|MSH|||  
VATS|Video-Assisted Thoracoscopic Surgeries|||C0752151|MSH|||  
VATS|Video-Assisted Thoracoscopic Surgery|||C0752151|MSH|||  
VATS|Video-assisted Thoracic Surgery|C0752151|||C0752151|NCI|||  
VATS|Video-assisted thoracic surgery|C0752151|||1|0.4494|  
VATS|variable antigen types|||1|0.0417|  
VATS|variable antigen, surface|||1|  
VATS|vats|C0752151|||C0752151|CHV|||  
VATS|video assisted thoracic surgery|C0752151|||C0752151|CHV|||  
VATS|video-assisted thoracic surgery|C0752151|1|1.000|C0752151|CHV|||1  
VATS|video-assisted thoracic surgery (VATS)|C0752151|||C0752151|CHV|||  
VATS|video-assisted thoracic surgical|||1|0.0241|  
VATS|video-assisted thoracoscopic|||1|0.0225|  
VATS|video-assisted thoracoscopic surgery|||1|0.4189|1  
VATS|video-assisted thoracoscopic surgical|||1|0.0128|  
VATS|video-assisted thoracoscopy|||1|0.0305|1  
VATS|video-assisted transthoracic surgery|||1|  
VBAC|VBAC|C0080301|||C0080301|MSH;NCI|||  
VBAC|Vaginal Birth After Cesarean|C0080301|||C0080301|COSTAR|||  
VBAC|Vaginal Birth after Cesarean|C0080301|||C0080301|MSH;NCI|||  
VBAC|Vaginal Birth after Cesareans|C0080301|||C0080301|MSH|||  
VBAC|Vaginal Births after Cesarean|C0080301|||C0080301|MSH|||  
VBAC|Vaginal birth after cesarean|C0080301|||1|0.4725|  
VBAC|vaginal birth after Caesarean|C0080301|||1|0.1429|  
VBAC|vaginal birth after caesarean|C0080301|||C0080301|CHV|||  
VBAC|vaginal birth after  
cesarean|C0080301|1|1.000|C0080301|CHV;COSTAR;MSH;NCI|||1  
VBAC|vaginal birth after cesarean delivery|||1|0.1319|  
VBAC|vaginal birth after cesarean section|||1|0.2527|  
VBAC|vaginal births after cesarean|C0080301|||C0080301|CHV|||  
VBG|Veronal-buffered gelatin|||1|  
VBG|Vertical banded gastroplasty|C0729258|||1|1|  
VBG|vagotomy and Billroth gastroenterostomy|||1|  
VBG|vascularized bone graft|||1|  
VBG|venoaortocoronary artery bypass graft|||1|  
VBG|venous blood gas||1|0.402|||1|  
VBG|venous bypass graft|||1|  
VBG|vertical banded gastroplasty|C0729258|1|0.598|||1|  
VCUG|voiding cysto-urethrography|||1|0.0867|  
VCUG|voiding cystourethrogram|C0203123|1|1.000|||1|0.2133|  
VCUG|voiding cystourethrography|||1|0.7|  
VDRL|VDRL|C0201406|||C0201406|LNC|||  
VDRL|VDRL - Venereal diseases research laboratory  
test|C0201406|||C0201406|SNOMEDCT|||  
VDRL|VDRL test|C0201406|||C0201406|MTH;SNOMEDCT|||

VDRL|VDRL test (procedure)|||C0201406|SNOMEDCT|||  
VDRL|VDRL test, NOS|C0201406|||C0201406|SNOMEDCT|||  
VDRL|Venereal Disease Research Laboratory|C0042430|1|1.000|||1|0.9355|1  
VDRL|Venereal Disease Research Laboratory (VDRL) test|||C0201406|SNOMEDCT|||  
VDRL|Venereal Disease Research Laboratory (VDRL) test  
(procedure)|||C0201406|SNOMEDCT|||  
VDRL|Venereal Disease Research Laboratory test|||1|0.0645|  
VDRL|Venereal diseases research laboratory test|||C0201406|SNOMEDCT|||  
VDRL|Venereal diseases research laboratory test  
(procedure)|||C0201406|SNOMEDCT|||  
VDRL|vdr1 test|C0201406|||C0201406|CHV|||  
VDRL|venereal disease research laboratory|C0042430|||C0042430|MTH|||  
VDRL|venereal disease research laboratory (VDRL) test|||C0201406|CHV|||  
VK|V potassium||1|1.000|||  
VK|vervet kidney|||1|  
VK|vitamin K|C0042878;C2936884|||1|1|  
VLDL|Lipoprotein.pre-beta|C0023825|||C0023825|LNC|||  
VLDL|Lipoproteins, VLDL|C0023825|||C0023825|MSH;NDFRT|||  
VLDL|Lipoproteins, VLDL [Chemical/Ingredient]|||C0023825|NDFRT|||  
VLDL|Lipoproteins, Very-Low-Density|C0023825|||C0023825|MSH|||  
VLDL|Pre beta Lipoproteins|C0023825|||C0023825|MSH|||  
VLDL|Pre-beta lipoprotein|C0023825|||C0023825|SNOMEDCT|||  
VLDL|Pre-beta-Lipoproteins|C0023825|||C0023825|MSH;NDFRT|||  
VLDL|Prebeta Lipoproteins|C0023825|||C0023825|MSH|||  
VLDL|Prebeta-Lipoproteins|C0023825|||C0023825|MSH;NDFRT|||  
VLDL|Serum VLDL Cholesterol Measurement|C0428461|||C0428461|NCI|||  
VLDL|Serum VLDL cholesterol level|C0428461|||C0428461|SNOMEDCT|||  
VLDL|Serum VLDL cholesterol measurement|C0428461|||C0428461|MTH;SNOMEDCT|||  
VLDL|Serum VLDL cholesterol measurement (procedure)|||C0428461|SNOMEDCT|||  
VLDL|VLDL|C0428461|||C0023825;C0428461;C1325416|AOD;CSP;GO;NCI;SNOMEDCT|||  
VLDL|VLDL - Very low density lipoprotein|C0023825|||C0023825|SNOMEDCT|||  
VLDL|VLDL Cholesterol|C0023826;C0428461|||C0428461|NCI|||  
VLDL|VLDL Lipoproteins|C0023825|||C0023825|MSH|||  
VLDL|Very Low Density Lipoproteins|C0023825|||C0023825|MSH|||  
VLDL|Very low density lipoprotein|C0023825|||C0023825|MTH;SNOMEDCT|||  
VLDL|Very low density lipoprotein (substance)|||C0023825|SNOMEDCT|||  
VLDL|Very-Low-Density Lipoproteins|C0023825|||C0023825|MSH;NDFRT|||  
VLDL|lipoprotein cholesterol|C0065055|||1|0.0037|  
VLDL|low density|||1|0.0436|  
VLDL|low density lipoprotein|C0023823|||1|0.8731|  
VLDL|pre-beta Lipoprotein|C0023825|||C0023825|SNOMEDCT|||  
VLDL|very low density lipoprotein|C0023825|1|1.000|C0023825|AOD;CHV;CSP|||1  
VLDL|very low density lipoprotein (VLDL)|C0023825|||C0023825|CHV|||  
VLDL|very low density lipoproteins|C0023825|||C0023825|CHV|||  
VLDL|very-low-density|||1|0.0104|  
VLDL|very-low-density lipoprotein|C0023825|||C1325416|GO|||  
VLDL|very-low-density lipoprotein activity|C1325416|||C1325416|MTH|||  
VLDL|very-low-density lipoproteins|C0023825|||1|0.0693|  
VLDL|vld1|C0428461|||C0023825|CHV|||  
VP|ADH|||C0138318;C1706109|NCI|||  
VP|ARVP|||C0138318;C1706109|NCI|||  
VP|AVP|||C0138318;C1706109|NCI|||  
VP|AVP wt Allele|C1706109|||C1706109|MTH;NCI|||  
VP|AVP-NPII|C0138318;C1706109|||C0138318;C1706109|NCI|||  
VP|AVRP|C0138318;C1706109|||C0138318;C1706109|NCI|||  
VP|Arginine Vasopressin (Neurophysin II, Antidiuretic Hormone, Diabetes  
Insipidus, Neurohypophyseal) wt Allele|||C1706109|NCI|||

VP|Arginine Vasopressin-Neurophysin II  
Preproprotein|C0138318|||C0138318|MTH;NCI|||  
VP|Arginine-vasopressin|C0003779;C1527128|||1|0.006|  
VP|CBDCA/VCR|||C0280102|NCI;PDQ|||  
VP|CDDP and VBL chemotherapy protocol|||C0280544|CHV|||  
VP|CDDP/DAVA|||C0280545|NCI;PDQ|||  
VP|CDDP/VBL|||C0280544|NCI;PDQ|||  
VP|Carboplatin/Vincristine|||C0280102|NCI|||  
VP|Cisplatin/Vinblastine|||C0280544|NCI|||  
VP|Cisplatin/Vindesine|||C0280545|NCI|||  
VP|Dean-Barnes syndrome|C0162532|||C0162532|SNOMEDCT|||  
VP|Deficiencies, Protoporphyrinogen Oxidase|C0162532|||C0162532|MSH|||  
VP|Mixed porphyria|C0162532|||C0162532|SNOMEDCT|||  
VP|Nuclei ventrales posteriores|C0228336|||C0228336|FMA|||  
VP|Nucleus ventralis posterior|||C0228336|FMA;SNOMEDCT|||  
VP|Nucleus ventralis posterior (body structure)|||C0228336|SNOMEDCT|||  
VP|Nucleus, Ventral Posterior|C0228336|||C0228336|MSH|||  
VP|PORPHYRIA CUTANEA TARDA HEREDITARIA|C0162532|||C0162532|DXP|||  
VP|PORPHYRIA VARIEGATA|C0162532|||C0162532|OMIM|||  
VP|PORPHYRIA, MIXED HEPATIC|C0162532|||C0162532|DXP|||  
VP|PORPHYRIA, SOUTH AFRICAN GENETIC|C0162532|||C0162532|DXP|||  
VP|PORPHYRIA, VARIEGATE|C0162532|||C0162532|DXP|||  
VP|PPOX DEFICIENCY|C0162532|||C0162532|OMIM|||  
VP|PRDL/VCR|||C0078413|NCI;PDQ|||  
VP|PROTOPORPHYRINOGEN OXIDASE DEFIC|||C0162532|MSH|||  
VP|PROTOPORPHYRINOGEN OXIDASE DEFICIENCY|C0162532|||C0162532|OMIM|||  
VP|PVe|C0280544|||C0280544|NCI;PDQ|||  
VP|Porphyria Variegata|||C0162532|MSH;NDFRT|||  
VP|Porphyria Variegates|||C0162532|MSH|||  
VP|Porphyria variegata|C0162532|||C0162532|SNOMEDCT|||  
VP|Porphyria, Variegata|C0162532|||C0162532|MSH;NDFRT|||  
VP|Porphyria, Variegata [Disease/Finding]|||C0162532|NDFRT|||  
VP|Posterior Nucleus, Ventral|C0228336|||C0228336|MSH|||  
VP|Prednisolone/Vincristine|||C0078413|NCI|||  
VP|Prepro-Arginine-Vasopressin-Neurophysin II|C0138318|||C0138318|NCI|||  
VP|Protocoproporphyrinogen|C0162532|||C0162532|MTHICD9;SNOMEDCT|||  
VP|Protoporphyrinogen Oxidase Deficiency|C0162532|||C0162532|MSH;NDFRT|||  
VP|Protoporphyrinogen oxidase deficiency|C0162532|||C0162532|SNOMEDCT|||  
VP|Protoporphyrinogen oxidase deficiency (disorder)|||C0162532|SNOMEDCT|||  
VP|South African genetic porphyria|C0162532|||C0162532|SNOMEDCT|||  
VP|South African porphyria|C0162532|||C0162532|SNOMEDCT|||  
VP|Structure of ventral posterior nucleus of  
thalamus|C0228336|||C0228336|SNOMEDCT|||  
VP|Structure of ventral posterior nucleus of thalamus (body  
structure)|||C0228336|SNOMEDCT|||  
VP|V-DDP|C0280544|||C0280544|NCI;PDQ|||  
VP|VARIEGATE PORPHYRIA|C0162532|||C0162532|OMIM|||  
VP|VP|C1883540|||C0078413;C0138318;C0162532;C0228336;C0280102;C0280544;C0280545;  
C1706109;C1883540;C2247213|FMA;GO;NCI;OMIM;PDQ|||  
VP|VP - Variegate porphyria|C0162532|||C0162532|SNOMEDCT|||  
VP|VP protocol|C0078413|||C0078413|MSH|||  
VP|Variegate Porphyria|C0162532|||C0162532|MSH;MTH;NCI;NDFRT|||  
VP|Variegate porphyria|C0162532|||C0162532|SNOMEDCT|||  
VP|Variegate porphyria (disorder)|||C0162532|SNOMEDCT|||  
VP|Variegate, Porphyria|||C0162532|MSH|||  
VP|Variegates, Porphyria|||C0162532|MSH|||  
VP|Vasopressin-Neurophysin II-Copeptin|C0138318|||C0138318|NCI|||

VP|VeP||||C0280544|PDQ|||  
VP|Ventral Posterior Nucleus|C0228336|||C0228336|MSH;MTH|||  
VP|Ventral Posterior Thalamic Nucleus|C0228336|||C0228336|MSH|||  
VP|Ventral posterior nucleus|C0228336|||C0228336|FMA|||  
VP|Ventral posterior nucleus of  
thalamus|C0228336;C1284633|||C0228336|SNOMEDCT|||  
VP|Ventral posterior thalamic nucleus|C0228336|||C0228336|FMA|||  
VP|Ventrobasal complex|C0228336|||C0228336|FMA|||  
VP|Ventrobasal nucleus|C0228336|||C0228336|FMA|||  
VP|Vind-Plat|C0280545|||C0280545|NCI;PDQ|||  
VP|Viral Particle|C0042760;C1883540|||C1883540|NCI|||  
VP|Viral Particle Unit|C1883540|||C1883540|MTH;NCI|||  
VP|Viral Particles|C0042760;C1883540|||C1883540|NCI|||  
VP|Voges-Proskauer|||||1  
VP|carboplatin/vincristine|||C0280102|PDQ|||  
VP|carboplatin/vincristine protocol|||C0280102|MTH|||  
VP|cisplatin and vincristine chemotherapy protocol|||C0280544|CHV|||  
VP|cisplatin/vinblastine|||C0280544|PDQ|||  
VP|cisplatin/vinblastine protocol|C0280544|||C0280544|MTH|||  
VP|cisplatin/vindesine|||C0280545|PDQ|||  
VP|cisplatin/vindesine protocol (CDDP/DAVA)|C0280545|||C0280545|MTH|||  
VP|correction for the residual plasma volume|||||1|0.003|  
VP|etoposide|C0015133|||||1|0.006|  
VP|flow propagation velocity|||||1|0.0126|  
VP|hybrid peroxidase activity|C2247213|||C2247213|GO|||  
VP|plasma volume|C0032127|||||1  
VP|polyvalent peroxidase activity|C2247213|||C2247213|GO|||  
VP|porphyria variegata|C0162532|||C0162532|CHV|||  
VP|porphyria variegate|||C0162532|CHV|||  
VP|porphyria variegated|||C0162532|CHV|||  
VP|potential|C0035647|||||1|0.0072|  
VP|prednisolone/vincristine|||C0078413|PDQ|||  
VP|prednisolone/vincristine protocol|C0078413|||C0078413|MTH|||  
VP|principal sensory trigeminal nucleus|C0228701|||||1|0.0042|  
VP|proteins|C0033684|||||1|0.0054|  
VP|reactive-black-5:hydrogen-peroxide oxidoreductase activity|||C2247213|GO|||  
VP|vagal paraganglioma|C0474819|||||1  
VP|vapor pressure|C0563290|||C0563290|AOD;MSH;SNOMEDCT|||1  
VP|variably positive|||||1  
VP|variegate  
porphyria|C0162532|||C0162532|AOD;CHV;MSH;MTH;NCI;NDFRT;OMIM;SNOMEDCT|1|0.0312|1  
VP|vascular parkinsonism|C0393568|||||1|0.0162|  
VP|vascular permeability|C0162337|||C0162337|CHV;MSH;SNOMEDCT|1|0.0192|1  
VP|vasopressin|C0003779;C0042413;C1705480|||C0003779;C0042413;C0201849;C1705480|  
AOD;CHV;CSP;FMA;LCH;LNC;MSH;MTH;MTHSPL;NCI;NDFRT;PDQ;SNOMEDCT;USPMG;UWDA;VANDF|1  
|0.5357|1  
VP|velopharyngeal|||||1|0.0144|1  
VP|venipuncture|C0190979;C0600406;C1548758|||||1  
VP|venous plethysmograph|||||1  
VP|venous pressure|C0042486|||C0042486|CHV;LCH;MSH;SNOMEDCT|1|0.0132|1  
VP|ventral|C1704448|||||1|0.0066|  
VP|ventral pallidum|C2328531|||||1|0.0414|  
VP|ventral posterior|||||1|0.0036|  
VP|ventral posterior nucleus|C0228336|||C0228336|CHV|||  
VP|ventral prostate|||||1|0.0498|  
VP|ventralis posterior|||||1|0.003|  
VP|ventricle to peritoneal cavity|||||1

VP|ventricular pacing|||||1|0.0156|1  
VP|ventricular pericardium|||||1  
VP|ventricular peritoneal||1|1.000||||1  
VP|ventricular premature|||||1  
VP|ventriculo-peritoneal|||||1|0.0186|  
VP|ventriculoperitoneal|||||1|0.1248|  
VP|ventrobasal complex|C0228336|||C0228336|CHV|||  
VP|ventroposterior|||||1|0.009|1  
VP|ventroposterior nucleus|||||1|0.006|  
VP|verapamil|C0042523|||||1|0.033|  
VP|versatile peroxidase activity|C2247213|||C2247213|GO;MTH|||  
VP|vertex potential|||||1  
VP|viral particles|C0042760;C1883540|||C1883540|NCI|1|0.0042|  
VP|viral protein|C0042736|||C0042736|NCI|1|0.0042|1  
VP|virus protein|C0042736|||||1  
VP|visual perception|C0042789;C0042830|||||1  
VP|voiding pressure|||||1  
VP|volume plethysmograph|C0492284|||||1  
VP|volume-pressure|||||1  
VP|volumetric lung depth|||||1  
VP|vulnerable period|||||1|0.006|1  
VP|{VP}|C1883540|||C1883540|NCI|||  
VQ|US Virgin Islands|||C0042752|AOD|||  
VQ|US Virgin island|||C0042752|SNOMEDCT|||  
VQ|US Virgin island (geographic location)|||C0042752|SNOMEDCT|||  
VQ|US Virgin islands|||C0042752|SNOMEDCT|||  
VQ|United States Virgin Islands|C0042752|||C0042752|MSH;MTH;NCI|||  
VQ|United States Virgin island|||C0042752|SNOMEDCT|||  
VQ|VI|C0445379;C1706398|||C0042752|NCI|||  
VQ|VIR|C0042752|||C0042752|NCI|||  
VQ|VIRGIN ISLANDS|C0042752|||C0042752|MSH|||  
VQ|VIRGIN ISLANDS, U.S.|C0042752|||C0042752|NCI|||  
VQ|VQ|||C0042752|NCI|||  
VQ|Virgin Islands|C0042752|||C0042752|NCI|||  
VQ|Virgin Islands of the United States|C0042752|||C0042752|AOD;LCH;MSH|||  
VQ|Virgin Islands, U.S.|C0042752|||C0042752|NCI|||  
VQ|vector quantization|||||1|0.4545|  
VQ|ventilation perfusion||1|1.000||||  
VQ|ventilation-perfusion|||||1|0.5455|  
VQ|voice quality|C0042943|||C0042943|CHV;MSH;MTH|||1  
VRE|VRE|C1265175|||C1265175|NCI;SNOMEDCT|||  
VRE|Vancomycin Resistant Enterococcus|C1265175|||C1265175|NCI;SNOMEDCT|||  
VRE|Vancomycin Resistant Enterococcus (organism)|||C1265175|SNOMEDCT|||  
VRE|Vancomycin resistant enterococcus|C1265175|||C1265175|SNOMEDCT|||  
VRE|Vancomycin resistant enterococcus (organism)|||C1265175|SNOMEDCT|||  
VRE|vancomycin resistant enterococcus (VRE)|C1265175|||C1265175|CHV|||  
VRE|vancomycin-resistant Enterococcus|C1265175|1|1.000||||1  
VRE|vancomycin-resistant Enterococcus faecium|||||1|0.0533|  
VRE|vancomycin-resistant enterococcal|||||1|0.0313|  
VRE|vancomycin-resistant enterococci|||||1|0.7574|  
VRE|vancomycin-resistant enterococcus|C1265175|||||1|0.1581|  
VRE|vision right eye|||||1  
VRE|vre|C1265175|||C1265175|CHV|||  
VSD|DEFECT INTERVENTRICULAR SEPTUM|C0018818|||C0018818|CST|||  
VSD|Defect, Intraventricular Septal|C0018818|||C0018818|MSH|||  
VSD|Defect, Ventricular Septal|C0018818|||C0018818|MSH|||  
VSD|Defects, Intraventricular Septal|C0018818|||C0018818|MSH|||

VSD|Heart Septal Defects, Ventricular|C0018818|||C0018818|MSH;NDFRT|||  
VSD|Heart Septal Defects, Ventricular [Disease/Finding]|||C0018818|NDFRT|||  
VSD|Interventricular septal defect|C0018818|||C0018818|MTHICD9;SNOMEDCT|||  
VSD|Interventricular septal defect (disorder)|||C0018818|SNOMEDCT|||  
VSD|Intraventricular Septal Defect|C0018818|||C0018818|MSH|||  
VSD|Intraventricular Septal Defects|C0018818|||C0018818|MSH;NDFRT|||  
VSD|SEPTUM INTERVENTRICULAR PATENT|C0018818|||C0018818|CST|||  
VSD|Septal Defect, Intraventricular|C0018818|||C0018818|MSH|||  
VSD|Septal Defect, Ventricular|C0018818|||C0018818|MSH|||  
VSD|Septal Defects, Intraventricular|C0018818|||C0018818|MSH|||  
VSD|Septal Defects, Ventricular|C0018818|||C0018818|MSH|||  
VSD|Septal def.-ventricular|||C0018818|SNOMEDCT|||  
VSD|VENTRICULAR SEPTAL DEFECT|C0018818|||C0018818|COSTAR;CST;DXP|||  
VSD|VSD|C0018818|||C0018818|DXP;NCI|||  
VSD|VSD - Ventricular septal defect|C0018818|||C0018818|SNOMEDCT|||  
VSD|Vaccine Safety Datalink|||1|0.0123|1  
VSD|Ventricular Septal Defect|C0018818|||C0018818|MSH;NCI;NDFRT|||  
VSD|Ventricular Septal Defect (VSD)|C0018818|||C0018818|CHV|||  
VSD|Ventricular Septal Defects|C0018818|||C0018818|MSH;MTH;NDFRT|||  
VSD|Ventricular sept defect|||C0018818|ICD9CM|||  
VSD|Ventricular septal abnormality|C0018818|||C0018818|SNOMEDCT|||  
VSD|Ventricular septal abnormality (disorder)|||C0018818|SNOMEDCT|||  
VSD|Ventricular septal def.|||C0018818|SNOMEDCT|||  
VSD|Ventricular septal defect|C0018818|||C0018818|CCS;ICD9CM;OMIM;SNOMEDCT|||  
VSD|Ventricular septal defect (VSD)|C0018818|||C0018818|OMIM|||  
VSD|Ventricular septal defect (disorder)|||C0018818|SNOMEDCT|||  
VSD|Ventricular septal defect NOS|C0018818|||C0018818|SNOMEDCT|||  
VSD|Ventricular septal defect NOS (disorder)|||C0018818|SNOMEDCT|||  
VSD|Ventricular septal defect, unspecified|||C0018818|SNOMEDCT|||  
VSD|Ventricular septal defect, unspecified (disorder)|||C0018818|SNOMEDCT|||  
VSD|Ventricular septal defects|C0018818|||C0018818|OMIM|||  
VSD|interventricular septal defect|C0018818|||C0018818|CHV|||  
VSD|vascular surface density|||1|0.0164|  
VSD|ventricular septal  
defect|C0018818|1|1.000|C0018818|AOD;CCS;CHV;COSTAR;CST;DXP;ICD9CM;MSH;NCI;NDFRT  
;OMIM;SNOMEDCT|1|0.9446|1  
VSD|ventricular septal defects|C0018818|||C0018818|CHV|||  
VSD|vesical external sphincter dyssynergia|||1  
VSD|vesicular stomatitis virus|C0042587;C0206548;C1623048|||1  
VSD|virtually safe dose|||1|0.0175|1  
VSD|voltage-sensitive dye|||1|0.0092|  
VSD|vsd|C0018818|||C0018818|CHV|||  
VT|Holy See|||C0042427|NCI|||  
VT|Holy See (Vatican City State)|||C0042427|NCI|||  
VT|Lung tidal volume|C0040210|||C0040210|SNOMEDCT|||  
VT|TACHYCARDIA VENTRICULAR|||C0042514|CST|||  
VT|TACHYCARDIA, VENTRICULAR|C0042514;C1963247|||C0042514|DXP|||  
VT|TV - Tidal volume|C0040210|||C0040210|SNOMEDCT|||  
VT|Tachycardia - ventric.|||C0042514|SNOMEDCT|||  
VT|Tachycardia, Ventricular|C0042514;C1963247|||C0042514|MSH;MTH;NDFRT|||  
VT|Tachycardia, Ventricular [Disease/Finding]|||C0042514|NDFRT|||  
VT|Tachycardia, ventricular|C0042514;C1963247|||C0042514|OMIM|||  
VT|Tachycardias, Ventricular|C0042514|||C0042514|MSH|||  
VT|Tidal Volume|C0040210|||C0040210|MSH;MTH|||  
VT|Tidal Volumes|C0040210|||C0040210|MSH|||  
VT|Tidal volume|C0040210|||C0040210|LNC;SNOMEDCT|||  
VT|Tidal volume (observable entity)|||C0040210|SNOMEDCT|||

VT|V T|C0040210|||C0040210|SNOMEDCT|||  
VT|V<sub>T</sub>|C0040210|||C0040210|SNOMEDCT|||  
VT|V>T<|C0040210|||C0040210|SNOMEDCT|||  
VT|VA|||C0042427|NCI|||  
VT|VAT|C0042427|||C0042427|NCI|||  
VT|VATICAN CITY STATE|C0042427|||C0042427|NCI|||  
VT|VENTRICULAR TACHYARRHYTHMIA|C0042514|||C0042514|COSTAR|||  
VT|VENTRICULAR TACHYCARDIA|C0042514;C1963247|||C0042514|COSTAR;CST;NCI|||  
VT|VT|||C0040210;C0042427;C0042514;C0042537|DXP;MTH;NCI|||  
VT|VT - Tidal volume|C0040210|||C0040210|SNOMEDCT|||  
VT|VT - Ventricular tachycardia|C0042514|||C0042514|SNOMEDCT|||  
VT|Vatican City|C0042427|||C0042427|AOD;LCH;MSH;MTH;NCI;SNOMEDCT|||  
VT|Vatican City (geographic location)|||C0042427|SNOMEDCT|||  
VT|Ventilation tube|C0850121;C1317862|||1|0.0029|  
VT|Ventricular Tachycardia|C0042514;C1963247|||C0042514|MSH;NCI;NDFRT|||  
VT|Ventricular Tachycardias|C0042514|||C0042514|MSH|||  
VT|Ventricular tachyarrhythmia|C0042514|||C0042514|SNOMEDCT|||  
VT|Ventricular tachyarrhythmia (disorder)|||C0042514|SNOMEDCT|||  
VT|Ventricular tachycardia|C0042514;C1963247|||C0042514|MTHICD9;NCI;SNOMEDCT|||  
VT|Ventricular tachycardia (disorder)|||C0042514|SNOMEDCT|||  
VT|Ventricular tachycardia, NOS|C0042514;C1963247|||C0042514|SNOMEDCT|||  
VT|Ventricular techycardia|||C0042514|SNOMEDCT|||  
VT|Vermont|C0042537|1|0.002|C0042537|AOD;LCH;MSH;MTH;NCI;SNOMEDCT|||  
VT|Vermont (geographic location)|||C0042537|SNOMEDCT|||  
VT|Volume, Tidal|C0040210|||C0040210|MSH|||  
VT|Volumes, Tidal|C0040210|||C0040210|MSH|||  
VT|exposure to the trichothecene vomitoxin|||1|0.001|  
VT|insertion of ventilation tubes|||1|0.0012|  
VT|lungs tidal volume|C0040210|||C0040210|CHV|||  
VT|respiratory airway volume|C0040210|||C0040210|CSP|||  
VT|t v|C0039461;C0040210|||C0040210|CHV|||  
VT|tetrazolium violet|C2603970|||1|  
VT|tidal volume|C0040210|1|0.002|C0040210|AOD;CHV;CSP|1|0.3243|1  
VT|tidal volume (vt)|||C0040210|CHV|||  
VT|tidal volumes|C0040210|||C0040210|CHV|||  
VT|total ventilation|||1|  
VT|transepithelial potential|||1|0.0053|  
VT|transepithelial potential difference|||1|0.0043|  
VT|transepithelial voltage|||1|0.0176|  
VT|unsustained ventricular tachycardia|||1|  
VT|v t|C0040210|||C0040210|CHV|||  
VT|v tach|C0042514|||C0042514|CHV|||  
VT|vacuum tube|||1|  
VT|vacuum tuberculin|||1|  
VT|validation therapy|C0556529|||1|  
VT|variable temperature|||1|  
VT|vasotocin|C0042418|||1|0.0111|1  
VT|venous thromboembolism|C1861172|||1|0.0027|  
VT|venous thrombosis|C0042487;C0517555|1|0.002|||1|0.0092|1  
VT|venous tone|||1|0.0012|  
VT|ventilating tubes|||1|0.0014|  
VT|ventilation  
tube|C0850121;C1317862|||C0850121;C1317862|CHV;LNC;MTH;SNOMEDCT|||  
VT|ventilatory threshold|||1|0.035|  
VT|ventral tegmentum|||1|0.0019|  
VT|ventricular tachyarrhythmia|C0042514|||C0042514|CHV|||1  
VT|ventricular tachyarrhythmias|||1|0.0135|

VT|ventricular  
tachycardia|C0042514;C1963247|1|0.980|C0042514;C1963247|CHV;COSTAR;CST;MSH;MTHIC  
D9;NCI;NDFRT;SNOMEDCT|1|0.5322|1  
VT|ventricular tachycardia (V-tach)|C0042514;C1963247|||C0042514|CHV|||  
VT|vermont|C0042537|||C0042537|CHV|||  
VT|vero cytotoxin|C0148323|||1|0.0036|  
VT|verocytotoxin|C0148323|||1|0.006|1  
VT|verotoxin|C0148323|||1|0.0186|1  
VT|video telemetry|||1|1|  
VT|vitellin|C0042892|||1|0.0046|  
VT|vocational training|C0204116|||1|0.0012|  
VT|volume transmission|||1|0.0012|  
VT|vt|||C0040210;C0042514|CHV|||  
VT|vts|C0040210|||C0040210|CHV|||  
WBC|Blood Cell Count, White|C0023508;C0427512|||C0023508|MSH|||  
WBC|Blood Cell, White|C0023516|||C0023516|MSH|||  
WBC|Blood Cells, White|C0023508;C0023516|||C0023516|MSH|||  
WBC|Blood Corpuscle, White|C0023516|||C0023516|MSH|||  
WBC|Blood Corpuscles, White|C0023516|||C0023516|MSH|||  
WBC|Corpuscle, White Blood|C0023516|||C0023516|MSH|||  
WBC|Corpuscles, White Blood|C0023516|||C0023516|MSH|||  
WBC|Count, Leukocyte|C0023508|||C0023508|MSH|||  
WBC|Counts, Leukocyte|C0023508|||C0023508|MSH|||  
WBC|Leucocyte|C0023516|||C0023516|FMA;SNOMEDCT|||  
WBC|Leukocyte|C0023516|||C0023516|FMA;LNC;MSH;NCI;SNOMEDCT|||  
WBC|Leukocyte (cell)|||C0023516|SNOMEDCT|||  
WBC|Leukocyte Count|C0023508|||C0023508|MSH;NCI|||  
WBC|Leukocyte Counts|C0023508|||C0023508|MSH|||  
WBC|Leukocyte Number|C0023508|||C0023508|MSH|||  
WBC|Leukocyte Numbers|C0023508|||C0023508|MSH|||  
WBC|Leukocyte, NOS|C0023516|||C0023516|SNOMEDCT|||  
WBC|Leukocytes|C0023516|||C0023508;C0023516|HL7V2.5;LNC;MSH;MTH;NCI|||  
WBC|Number, Leukocyte|C0023508|||C0023508|MSH|||  
WBC|Numbers, Leukocyte|C0023508|||C0023508|MSH|||  
WBC|Reticuloendothelial System, Leukocytes|C0023516|||C0023516|NCI|||  
WBC|WBC|C0023508;C0023516;C1882326|||C0023508;C0023516|CHV;LNC;MTH;NCI|||  
WBC|WBC (white blood cell)|C0023516|||C0023516|CSP|||  
WBC|WBC - White blood cell|C0023516|||C0023516|SNOMEDCT|||  
WBC|WBC - White blood cell count|C0023508|||C0023508|SNOMEDCT|||  
WBC|WBC count|C0023508|||C0023508|SNOMEDCT|||  
WBC|WCC - White blood cell count|C0023508|||C0023508|SNOMEDCT|||  
WBC|White Blood Cell|C0023516|||C0023516|MSH;NCI|||  
WBC|White Blood Cell Count|C0023508;C0427512|||C0023508|MSH;MTH|||  
WBC|White Blood Cell Count procedure|C0023508|||C0023508|MTH|||  
WBC|White Blood Cells|C0023508;C0023516|||C0023508;C0023516|MSH;NCI|||  
WBC|White Blood Corpuscle|C0023516|||C0023516|MSH|||  
WBC|White Blood Corpuscles|C0023516|||C0023516|MSH|||  
WBC|White Cell|C0023516|||C0023516|NCI|||  
WBC|White blood cell|C0023516|||C0023516|FMA;SNOMEDCT|||  
WBC|White blood cell (cell)|||C0023516|SNOMEDCT|||  
WBC|White blood cell count|C0023508;C0427512|||C0023508|SNOMEDCT|||  
WBC|White blood cell count (procedure)|C0023508|||C0023508|SNOMEDCT|||  
WBC|White blood cell count - observation|C0023508|||C0023508|SNOMEDCT|||  
WBC|White blood cell test|C0023508|||C0023508|SNOMEDCT|||  
WBC|White blood cell test (procedure)|||C0023508|SNOMEDCT|||  
WBC|White blood cell, NOS|C0023516|||C0023516|SNOMEDCT|||  
WBC|White blood cells|C0023508;C0023516|||C0023516|SNOMEDCT|||

WBC|blood corpuscles white||||C0023516|CHV|||  
WBC|blood leukocytes|C0023516|||C0023516|CHV|||  
WBC|blood white cell|C0023516|||C0023516|CHV|||  
WBC|blood white cells|C0023516|||C0023516|CHV|||  
WBC|bloods cells white||||C0023516|CHV|||  
WBC|cell leukocyte|C0023516|||C0023516|CHV|||  
WBC|leucocyte|C0023516|||C0023516|CHV|1|0.0095|  
WBC|leucocytes|C0023516|||C0023516|CHV|||  
WBC|leukocyte|C0023516|||C0023516|CHV;CSP;NCI|||  
WBC|leukocyte count|C0023508|||C0023508|AOD;CSP;MTH|||  
WBC|leukocytes|C0023516|||C0023516|AOD;CHV;MTH|1|0.0445|  
WBC|leukocytic|C0023516|||C0023516|CHV|||  
WBC|weightbearing with crutches|||||||1  
WBC|well-baby clinic|||||||1  
WBC|white blood  
cell|C0023516|1|1.000|C0023516|AOD;CHV;FMA;MSH;NCI;SNOMEDCT|1|0.7498|1  
WBC|white blood cell (WBC)|C0023516|||C0023516|CHV|||  
WBC|white blood cell  
count|C0023508;C0427512|||C0023508;C0427512|AOD;CHV;MSH;MTH;SNOMEDCT|1|0.1588|  
WBC|white blood cell count procedure|C0023508|||C0023508|CHV|||  
WBC|white blood cells|C0023508;C0023516|||C0023516|CHV|||  
WBC|white blood corpuscle|C0023516|||C0023516|AOD|||  
WBC|white blood count|||||1|0.0332|  
WBC|whole-body counter|C0043160|||||1|0.0043|  
XRT|external beam radiation therapy|C1517033|||C1517033|MTH;NCI|||  
XRT|external radiation therapy|C1517033;C1880643|||||||1  
XRT|irradiation|C1282930;C1522449|||||1|0.1185|  
XRT|radiation|C0034519;C0560559;C0851346;C1522449;C1524020;C1524021|||||1|0.1533  
|  
XRT|radiation therapy|C0034619;C1522449|1|1.000|||1|0.3589|  
XRT|radiotherapy|C0034619;C0243005;C1522449|||||1|0.3693|  
XRT|x-ray therapy|C0043308;C0220941|||C0043308;C0220941|AOD;CHV;MSH;MTH;NCI|||1
