# Supplementary material
Source: PubMed Central journal article supplement (PMC3932450)
Supplement: amiajnl-2012-001506-s2.pdf [file amiajnl-2012-001506-s2.pdf]

SF|LF|MetaMap CUI|CSI|Ratio in CSI|UMLS CUI|UMLS SOURCE|ADAM|Ratio in ADAM|Dictionary  
5-FU|2,4(1H,3H)-Pyrimidinedione, 5-fluoro-;5-Fluoro-2,4(1H,3H)-pyrimidinedione;5-Fluoro-2,4(1H,3H)-pyrimidinedione|||C0016360|MSH;NCI;NDFRT;PDQ|||  
5-FU|2,4-Dioxo-5-fluoropyrimidine|||C0016360|NCI;PDQ|||  
5-FU|5 Fluorouracil;5 fluorouracil;5-Fluorouracil;5-fluoro-uracil;5-fluorouracil;5fluorouracil;5 fu;5-FU;5-Fu;5-fu;5FU;5-Fluracil;5Fluracil;5FU - Fluorouracil;FLUOROURACIL;Fluoro Uracil;Fluorouracil;fluorouracil;Fluoruracil;Fluouracil|C0016360|1|1|C0016360|CHV;CSP;LCH;LNC;MSH;MTH;MTHSPL;NCI;NDFRT;PDQ;RXNORM;SNOMEDCT;USPMG;VANDF|1|0.9959|  
5-FU|5-flourouracil|||1|0.0018|  
5-FU|FU|C0016360;C1424823|||C0016360|PDQ|||  
5-FU|Fluorouracil (product)|||C0016360|SNOMEDCT|||  
5-FU|Fluorouracil (substance)|||C0016360|SNOMEDCT|||  
5-FU|Fluorouracil [Chemical/Ingredient]|||C0016360|NDFRT|||  
5-FU|chemotherapy|C0013216;C0013217;C0392920|||1|0.0024|  
6-MP|1,7-Dihydro-6H-purine-6-thione;6H-Purine-6-thione, 1,7-dihydro-|||C0000618|MSH;NCI;NDFRT;PDQ|||  
6-MP|1,7-Dihydro-6H-purine-6-thione Monohydrate|||C0000618|NCI;PDQ|||  
6-MP|3H-Purine-6-thiol;6 MP;6-MP;6-mp;6MP;6 Mercaptopurine;6 mercaptopurine;6-Mercaptopurine;6-mercaptopurine;Mercapto-6-purine;Purine, 6-mercpto-;6 Thiohypoxanthine;6-Thiohypoxanthine;6 Thiopurine;6 thiopurine;6-Thiopurine;6-thiopurine;6-Purinethiol;6-Thioxopurine;6MP - Mercaptopurine;MERCAPTOPURINE;Mercaptopurine;mercaptopurine;Mercapurin;Mern|C0000618|1|1|C0000618|CHV;CSP;LNC;MSH;MTH;MTHSPL;NCI;NDFRT;PDQ;RXNORM;SNOMEDCT;USPMG;VANDF|1|1|  
6-MP|6-Mercaptopurine [Chemical/Ingredient]|||C0000618|NDFRT|||  
6-MP|6H-Purine-6-thione, 1,7-dihydro- (9CI)|||C0000618|NCI;PDQ|||  
6-MP|7-Mercapto-1,3,4,6-tetrazaindene|||C0000618|NCI;PDQ|||  
6-MP|MERCAPTOPURINE A 06|||C0000618|MSH|||  
6-MP|MP|||C0000618|PDQ|||  
6-MP|Mercaptopurine (product)|||C0000618|SNOMEDCT|||  
6-MP|Mercaptopurine (substance)|||C0000618|SNOMEDCT|||  
6-MP|Purine-6-thiol (8CI)|||C0000618|NCI;PDQ|||  
AAA|A4|||C1705543|NCI|||  
AAA|AAA|||C0162871;C0271742;C0611285;C1364818;C1705543|MEDLINEPLUS;NCI;OMIM|||  
AAA|AAA - Abdominal aortic aneurysm;abdominal aortic aneurysm (AAA);ABDOMINAL AORTIC ANEURYSM;ANEURYSM, ABDOMINAL AORTIC;Abdominal Aortic Aneurysm;Abdominal Aortic Aneurysms;Abdominal aortic aneurysm;Aneurysm, Abdominal Aortic;Aneurysms, Abdominal Aortic;Aortic Aneurysm, Abdominal;Aortic Aneurysms, Abdominal;abdominal aortic aneurysm;abdominal aortic aneurysms|C0162871;C2926614|1|0.998|C0162871;C2926614|CHV;COSTAR;LNC;MEDLINEPLUS;MSH;MTH;NCI;NDFRT;OMIM;SNOMEDCT|1|0.93|1  
AAA|ABETA|C1420510;C1705543|||C1705543|NCI|||  
AAA|ABPP|C0054150;C0611285|||C0611285|NCI|||  
AAA|ACHALASIA-ADDISONIANISM-ALACRIMA SYNDROME;ADDISONIAN-ACHALASIA SYNDROME;Achalasia-addisonian syndrome;Addisonian achalasia syndrome;ALACRIMA-ACHALASIA-ADDISONIANISM;Alacrima-Achalasia-Addisonianism;ALACRIMA-ACHALASIA-ADRENAL INSUFFICIENCY NEUROLOGIC DISORDER;Alacrima-achalasia-adrenal insufficiency neurologic disorder;ALLGROVE SYNDROME;Allgrove Syndrome;Allgrove syndrome;allgrove syndrome;allgroves syndrome;Achalasia Addisonianism Alacrimia syndrome;Alacrimia-achalasia-addisonianism;GLUCOCORTICOID DEFICIENCY AND ACHALASIA;Glucocorticoid deficiency and achalasia;Glucocorticoid deficiency with achalasia;HYPOADRENALISM WITH ACHALASIA;Hypoadrenalism with achalasia;TRIPLE-A SYNDROME;Triple A syndrome;triple a syndrome|C0271742|||C0271742|CHV;MSH;MTH;NCI;OMIM;SNOMEDCT|||

AAA|ACTH resistant adrenal insufficiency, achalasia and alacrima;ACTH-RESISTANT  
ADRENAL INSUFFICIENCY, ACHALASIA AND ALACRIMA|||C0271742|MSH;OMIM|||  
AAA|AD1|||C1705543|NCI|||  
AAA|AMYLOID BETA A4 PRECURSOR PROTEIN;Amyloid Beta (A4) Precursor  
Protein;Amyloid Beta A4 Protein Precursor;amyloid beta (A4) precursor  
protein|C0611285;C1364818||C0611285;C1364818|HUGO;NCI;OMIM|||  
AAA|AMYLOID OF AGING AND ALZHEIMER DISEASE|||C1364818|OMIM|||  
AAA|ANEURYSM, AORTA, ABDOMINAL;abdominal aorta aneurysm;abdominal  
aneurysm;abdominal aneurysms;aneurysm abdominal|C0162871||C0162871|CHV;DXP|||  
AAA|APP|||C0611285;C1364818|HUGO;NCI;OMIM|||  
AAA|APP Gene;APP gene;CEREBRAL VASCULAR AMYLOID PEPTIDE;DEMENTIA, EARLY-ONSET  
PROGRESSIVE, AUTOSOMAL RECESSIVE;peptidase nexin-  
II|C1364818||C1364818|HUGO;MTH;NCI;OMIM|||  
AAA|APP protein, human;APPI;Alzheimer Disease 1 Protein;Alzheimer's Disease  
Amyloid Protein;Cerebralvascular Amyloid Peptide;PN II;PN-II;PreA4;Protease  
Nexin-II, Alzheimer Disease;peptidase nexin-II, human;protease nexin 2,  
human|C0611285||C0611285|MSH;MTH;NCI|||  
AAA|APP wt Allele|C1705543||C1705543|MTH;NCI|||  
AAA|Abdominal aortic aneurysm (disorder)|||C0162871|SNOMEDCT|||  
AAA|Aleuria aurantia agglutinin|||1|0.0034|  
AAA|Amyloid|C0002716;C0011560;C0611285||C0611285|NCI|||  
AAA|Amyloid Beta (A4) Precursor Protein (Protease Nexin-II, Alzheimer Disease)  
Gene|||C1364818|NCI|||  
AAA|Amyloid Beta (A4) Precursor Protein (Protease Nexin-II, Alzheimer Disease)  
wt Allele|||C1705543|NCI|||  
AAA|Amyloid Beta-Peptide|C0078939;C0611285||C0611285|NCI|||  
AAA|Amyloid of Aging and Alzheimer Disease Protein|||C0611285|NCI|||  
AAA|Anguilla anguilla agglutinin|||1|0.0046|  
AAA|Aortic Aneurysm, Abdominal [Disease/Finding]|||C0162871|NDFRT|||  
AAA|CVAP|||C0611285;C1364818;C1705543|NCI;OMIM|||  
AAA|Glucocorticoid deficiency with achalasia (disorder)|||C0271742|SNOMEDCT|||  
AAA|PN2|C0332398;C0611285;C1364818||C0611285;C1364818|NCI;OMIM|||  
AAA|PROTEASE NEXIN II;Protease Nexin  
II|C0085151;C0611285;C1364818||C0611285;C1364818|NCI;OMIM|||  
AAA|abdominal Aorta|C0003484;C1269882|||1|0.0189|  
AAA|abdominal aortic aneurysm repair|C0741152|||1|0.004|  
AAA|abdominal aortic aneurysmectomy|||1|  
AAA|achalasia-addisonism-alacrimia|||1|  
AAA|acne-associated arthritis|||1|  
AAA|acquired aplastic anemia|C0271907|1|0.002|C0271907|SNOMEDCT|||1|  
AAA|acute anxiety attack|||1|  
AAA|acute apical abscess|C1290646||C1290646|SNOMEDCT|||  
AAA|addiction, autoimmune diseases, aging|||1|  
AAA|alpha-aminoadipic acid|C0000257||C0000257|MSH;NDFRT;SNOMEDCT|||  
AAA|amalgam|C0440138;C0580619|||1|  
AAA|amino acid analysis|||1|  
AAA|amyloid beta (A4) precursor protein (protease nexin-II, Alzheimer disease)  
protein, human|||C0611285|MSH|||  
AAA|androgenic anabolic agent|||1|  
AAA|aneurysm of ascending aorta|C0856747||C0856747|CHV;SNOMEDCT|||1|  
AAA|angiography of abdominal aorta|||1|  
AAA|anti-actin antibody|C0369998||C0369998|SNOMEDCT|||  
AAA|anti-albumin antibodies|||1|0.0029|  
AAA|antigen-extracted allogenic|||1|  
AAA|aromatic amino acid;aromatic amino  
acids|C0301713||C0301713|CHV;MSH;SNOMEDCT|1|0.0201|1|  
AAA|arrest after arrival|||1|

AAA|arthrosomy, arthrosomy, arthrotomy|||||||1  
AAA|aryl acylamidase|C0052439|||C0052439|MSH;SNOMEDCT|||  
AAA|autoantibodies|C0004358|||||1|0.0052|  
AAA|autolyzed antigen-extracted allogeneic||||||1|0.0029|  
AAA|autolyzed, antigen-extracted, allogenic|||||||1  
AAA|cellular activities||||||1|0.008|  
ABG|A1B||||C1412045|OMIM|||  
ABG|A1BG;A1BG gene;ALPHA-1-B-GLYCOPROTEIN;alpha-1-B  
glycoprotein|C1412045|||C1412045|HUGO;MTH;OMIM|||  
ABG|ABG|C0150411;C1412045|||C0150411;C1412045|NCI;OMIM|||  
ABG|ABG - Arterial blood gas analysis;ABGs measurement;Analysis of arterial  
blood gases and pH;Arterial Blood Gas Measurement;Arterial blood gas  
analysis;analysis arterial blood gas;arterial blood gas analysis;Arterial blood  
gases;arterial blood gases;Blood gases, arterial measurement;Gases, arterial  
measurement;Measurement of systemic arterial blood gases;arterial blood  
gas;blood gas arterial;arterial blood  
gase|C0150411|1|1|C0150411|CCS;CHV;ICD9CM;MTH;NCI;SNOMEDCT|1|0.8022|1  
ABG|Analysis of arterial blood gas (oxygen saturation, pO2, pCO2, CO2, pH); rest  
only||||C0150411|MTH|||  
ABG|Analysis of arterial blood gases and pH (procedure)|||C0150411|SNOMEDCT|||  
ABG|Arterial bld gas measure||||C0150411|ICD9CM|||  
ABG|Arterial blood gas analysis (procedure)|||C0150411|SNOMEDCT|||  
ABG|Atrophic body gastritis|||||1|0.0604|  
ABG|Blood Gas Analysis;Blood Gas Measurement|C0005800;C0150411|||C0150411|NCI|||  
ABG|Blood gases, arterial measurement (procedure)|||C0150411|SNOMEDCT|||  
ABG|GAB|C0016910;C1412045|||C1412045|OMIM|||  
ABG|air-bone gap||||||1|0.1374|1  
ABG|aortoiliac bypass graft|||||||1  
ABG|axiobuccogingival|||||||1  
AB|AB;Ab;NOS AB;NOS Ab;Little NOS Ab;Little not otherwise specified  
Antibody;Unidentified Ab;Unidentified Antibody;not otherwise specified AB;not  
otherwise specified  
Antibody|C0003241|||C0000769;C0003241;C0580927;C1705545;C2700382|LNC;MSH;NCI;SNO  
MEDCT|||  
AB|AB - Zebrafish;AB Zebrafish|C2700382|||C2700382|MTH;NCI|||  
AB|AB Term Type|C1705545|||C1705545|MTH;NCI|||  
AB|AB hearing assessment list|C0580927|||C0580927|MTH;SNOMEDCT|||  
AB|AB hearing assessment list (physical object)|||C0580927|SNOMEDCT|||  
AB|ABNORM||||C0000769|MSH|||  
AB|Ace bandage|C0336591||||||1  
AB|Alcian blue|C0001933|||||1|0.0444|1  
AB|Antibodies;Antibody;Antibody,  
NOS;antibodies;antibody|C0003241;C0021027|||C0003241;C0021027;C1621287|AOD;CHV;C  
SP;FMA;GO;LNC;MSH;MTH;NCI;NDFRT;SNOMEDCT;UWDA|1|0.7669|1  
AB|Antibodies [Chemical/Ingredient]||||C0003241|NDFRT|||  
AB|Antibody (substance)|||C0003241|SNOMEDCT|||  
AB|Autologous blood||||||1|0.0112|  
AB|X-ray finding||1|0.002|||||  
AB|abdomen|C0000726;C0230168;C1281594|||C0000726;C0230168;C1281594|AOD;CHV;CSP;C  
ST;FMA;HL7V2.5;LCH;LNC;MSH;MTH;NCI;OMIM;SNOMEDCT;UWDA|||  
AB|abdominal|C0000726|||C0000726|CHV;LNC;NCI;SNOMEDCT|||1  
AB|able-bodied|||||1|0.0264|  
AB|abnormal|C0205161;C2347472;C2699333||||||1  
AB|abnormalities;abnormality|C0000768;C0000769;C1704258|||C0000769|MSH|||1  
AB|abortion|C0156543;C0392535|1|0.690|C0156543;C0392535;C1548806|AOD;CHV;COSTAR;  
CSP;CST;HL7V2.5;LCH;MEDLINEPLUS;NCI;SNOMEDCT|||1  
AB|abortus|C0000781;C1281512;C2004086||||||1

AB|active bilaterally|||||1  
AB|acute bronchitis|C0149514||||1|0.0045|  
AB|aid to the blind|C0001844|||||1  
AB|air bleed|||||1  
AB|air-bone|||||1  
AB|amobarbital|C0002640||||1|0.0051|  
AB|amphotericin B|C0002679||||1|0.0163|  
AB|ankle-brachial||1|0.002||||1  
AB|anomalies;teratologic|C0000769|||C0000769|MSH;MTH|||  
AB|anterior basal|||||1  
AB|anterior burster|||||1|0.0163|  
AB|antibiotic;antibiotics|C0003232|||C0003232|AOD;CHV;CSP;LCH;LNC;MEDLINEPLUS;MS  
H;MTH;NCI;PDQ;SNOMEDCT|1|0.014|1  
AB|antibodi;antibodied;antibodis|||C0003241|CHV|||  
AB|antibodys|||C0003241|CHV|||  
AB|antigen binding|C1148575|||C1148575|GO;MTH;NCI|||1  
AB|antipyrine benzocaine|C1445655|1|0.002|||||  
AB|aortic banding|||||1|0.0056|  
AB|apex beat|C0277909|||||1  
AB|apical-to-basolateral|||||1|0.0073|  
AB|apnea and bradycardia|||||1  
AB|armboard|||||1  
AB|arsenobetaine|C0052420||||1|0.0051|  
AB|arterial blood|C0229665;C1550611;C2335890|1|0.002|||||  
AB|artium baccalaureus|C1549948|||C1549948|NCI|||  
AB|asbestos bodies;asbestos body|C0333598|||C0333598|NCI;SNOMEDCT|1|0.0247|1  
AB|asthmatic bronchitis|C1319018|||C1319018|CHV;MTH;SNOMEDCT|||1  
AB|attentional blink|C1955945|||C1955945|MSH|1|0.0298|1  
AB|autoantibodies|C0004358|||||1|0.0118|  
AB|autogenous bone|||||1|0.0034|  
AB|autonomic blockade|||||1|0.0073|  
AB|axiobuccal|||||1  
AB|azure B|C0052827|||||1  
AB|blood group in ABO system||1|0.274|||||1  
AB|teratology|C0000769;C0220925|||C0000769|MSH|||  
AB|type A, type B||1|0.016|||||  
ABR|ABR;ABR gene;ACTIVE BCR-RELATED GENE;active BCR-related  
gene|C1412101|||C1412101|HUGO;MTH;OMIM|||  
ABR|American Board of Radiology|||||1|0.0143|  
ABR|Auditory brainstem response;auditory brain stem response;auditory brainstem  
response|C0079319;C0085854|1|1|C0085854|CHV;MSH|1|0.9697|1  
ABR|MDB|C0025149;C0043896;C1412101|||C1412101|HUGO|||  
ABR|abortus-Bang-ring|||||1  
ABR|abrasion|C0043242;C0580209;C1302752|||||1  
ABR|absolute bedrest|||||1  
ABR|agglutination test for brucellosis|||||1  
ABR|anterior band remover|||||1  
ABR|arterial baroreflex|||||1  
ABR|artery to bronchus ratio|||||1  
ABR|audiometric brainstem response|||||1  
ABR|auditory brain stem evoked response|C0079319|||C0079319|MSH|||  
ABR|auditory brainstem|||||1|0.0101|  
ABR|response testing|||||1|0.0059|  
ACE|AC|C1879503|||C0050385|PDQ|||  
ACE|AC chemotherapy protocol;AC protocol;CA  
protocol;Cyclophosphamide/Doxorubicin;Doxorubicin/Cyclophosphamide;cyclophosphan

ide/doxorubicin;doxorubicin cyclophosphamide;cyclophosphamide/doxorubicin  
protocol|C0050385|||C0050385|CHV;MSH;MTH;NCI;PDQ|||  
ACE|ACE;ACe|C0022709;C0201888|||C0022709;C0050385;C0108844;C0201888;C0279078;C14  
13931|CSP;HUGO;NCI;OMIM;PDQ|||  
ACE|ACE (wrap)||1|0.016|||  
ACE|ACE - Angiotensin-converting enzyme;Angiotensin Converting  
Enzyme;Angiotensin converting enzyme;Angiotensin-Converting Enzyme;Angiotensin-  
converting enzyme;angiotensin converting enzyme;angiotensin converting  
enzymes;angiotensin-converting enzyme;Antigens, CD143;CD143 Antigen;CD143  
Antigens;Carboxycathepsin;Dipeptidyl Carboxypeptidase I;Dipeptidyl  
carboxypeptidase I;Dipeptidyl Peptidase A;Peptidase P;Peptidyl Dipeptidase  
A;Peptidyl-Dipeptidase A;Peptidyl-dipeptidase A;peptidyl dipeptidase  
A;dipeptidyl  
peptidase;kininase|C0022709|1|0.982|C0022709;C0201888;C2258685|CHV;CSP;GO;LNC;MS  
H;MTH;NCI;NDFRT;SNOMEDCT|1|0.9545|1  
ACE|ACE Gene;ACE gene|C1413931|||C1413931|HUGO;LNC;MTH;NCI|||  
ACE|ACE measurement;Angiotensin Converting Enzyme Measurement;Angiotensin  
converting enzyme measurement;Angiotensin-I-converting enzyme  
measurement;Peptidyl dipeptidase A  
measurement|C0201888|||C0201888|MTH;NCI;SNOMEDCT|||  
ACE|ACE-II;AVE;CAVP-16;CDE chemotherapy protocol;CDE protocol;CDE protocol-  
cyclophosphamide/doxorubicin/etoposide|C0108844|||C0108844|CHV;MSH;MTH;NCI;PDQ||  
|  
ACE|ACE1|C1413931;C2984140|||C1413931|HUGO;OMIM|||  
ACE|ANGIOTENSIN I-CONVERTING ENZYME;Angiotensin I Converting Enzyme;Angiotensin  
I-Converting Enzyme;angiotensin converting enzyme i;angiotensin i converting  
enzyme;DIPEPTIDYL CARBOXYPEPTIDASE 1;Dipeptidyl Carboxypeptidase 1;KININASE  
II;Kininase  
II|C0022709;C1413931|||C0022709;C1413931|CHV;MSH;NCI;NDFRT;OMIM;SNOMEDCT|||  
ACE|ANTIGENS CD 143;CD 143 ANTIGENS|||C0022709|MSH|||  
ACE|APE|C0032636;C1675848|||C0279078|NCI;PDQ|||  
ACE|APE chemotherapy protocol;cisplatin/cytarabine/etoposide  
protocol|C0279078|||C0279078|CHV;MTH|||  
ACE|ARA-C/CDDP/VP-16|||C0279078|NCI;PDQ|||  
ACE|Addenbrooke's Cognitive Examination|||1|0.0017|  
ACE|Angiotensin I Converting Enzyme (Peptidyl-Dipeptidase A) 1  
Gene|||C1413931|NCI|||  
ACE|Angiotensin converting enzyme inhibitors|C0003015;C2757044|||1|0.0023|  
ACE|Angiotensin converting enzyme measurement  
(procedure)|||C0201888|SNOMEDCT|||  
ACE|Angiotensin-converting enzyme (substance)|||C0022709|SNOMEDCT|||  
ACE|CA|||C0050385|NCI;PDQ|||  
ACE|CAE|||C0108844|NCI;PDQ|||  
ACE|CAVP|C0055598;C0108844;C0163868|||C0108844|NCI;PDQ|||  
ACE|CD143|C0022709;C1413931;C2599700;C2984140|||C0022709;C1413931|HUGO;NCI|||  
ACE|CDE|C0108844;C1521917|||C0108844|NCI;PDQ|||  
ACE|CED|||C0108844|NCI;PDQ|||  
ACE|CTX/DOX|||C0050385|NCI;PDQ|||  
ACE|CTX/DOX/VP-16|||C0108844|NCI;PDQ|||  
ACE|Cisplatin/Cytarabine/Etoposide;cisplatin/cytarabine/etoposide|||C0279078|NC  
I;PDQ|||  
ACE|Cyclophosphamide/Doxorubicin/Etoposide;cyclophosphamide/doxorubicin/etoposid  
e|||C0108844|NCI;PDQ|||  
ACE|DCP1|C0752526;C1413931;C2984140|||C1413931|OMIM|||  
ACE|Dipeptidyl carboxypeptidase I (substance)|||C0022709|SNOMEDCT|||  
ACE|EC 3.2.1.-|||C0022709|NCI|||  
ACE|EC 3.4.15.1|||C0022709|NCI|||

ACE|Kininase A||||C0022709|MSH;NDFRT|||  
ACE|Peptidyl dipeptidase A measurement (procedure)||||C0201888|SNOMEDCT|||  
ACE|Peptidyl-Dipeptidase A [Chemical/Ingredient]||||C0022709|NDFRT|||  
ACE|accessory cholera enterotoxin|C0216868|||C0216868|MSH|||1  
ACE|acentric|||||||1  
ACE|acerebellar|||||1|0.0021|  
ACE|acetaldehyde|C0000966|||C0000966|AOD;CHV;CSP;LNC;MSH;NCI;NDFRT;SNOMEDCT|||  
ACE|acetate|C0000975|||C0000975|AOD;CHV;CSP;LNC;MTH;NCI;NDFRT;RXNORM;SNOMEDCT;VA  
NDF|||  
ACE|acetone|C0001002|||C0001002|AOD;CHV;CSP;LCH;LNC;MSH;MTH;NCI;NDFRT;RXNORM;SNO  
MEDCT;VANDF|||  
ACE|acetonitrile|C0050456|||||||1  
ACE|acetylcholine  
esterase;acetylcholinesterase|C0001044|||C0001044;C1412122|AOD;CHV;CSP;HUGO;LNC;  
MSH;MTH;NDFRT;OMIM;RXNORM;SNOMEDCT|1|0.0064|  
ACE|actinium emanation|||||||1  
ACE|acute care for elderly|||||||1  
ACE|acute cerebral encephalopathy|||||||1  
ACE|acute coronary event|||||||1  
ACE|adrenocortical extract|||||||1  
ACE|advanced combined encoder|||||||1  
ACE|adverse clinical event|||||||1  
ACE|aerobic chair exercise|||||||1  
ACE|aerosol cloud enhancer|||||||1  
ACE|affinity capillary electrophoresis|||||1|0.0116|  
ACE|alcohol, chloroform, ether|||||||1  
ACE|amygdaloid central nucleus;central amygdaloid  
nucleus|C0175219|||C0175219|FMA|1|0.0068|  
ACE|angiotensin I converting enzyme (peptidyl-dipeptidase A)  
1||||C1413931|HUGO|||  
ACE|angiotensin converting enzyme (ACE) test||||C0201888|CHV|||  
ACE|angiotensin converting enzyme gene|||||1|0.0015|  
ACE|antegrade colonic enema|||||||1  
ACE|antegrade continence enema||1|0.002|||1|0.0044|1  
ACE|arm crank ergometer|||||1|0.0011|  
ACE|arm crank ergometry|||||1|0.0009|  
ACE|autologous-cultured epithelium|||||||1  
ACE|central nucleus of the amygdala|||||1|0.0061|  
ACE|cisplatin, cytarabine, and etoposide chemotherapy  
protocol||||C0279078|CHV|||  
ACE|cyclophosphamide and etoposide|||||1|0.0006|  
ACE|cyclophosphamide doxorubicin (AC protocol);cyclophosphamide doxorubicin (AC)  
protocol||||C0050385|CHV|||  
ACE|cyclophosphamide, doxorubicin and etoposide chemotherapy  
protocol||||C0108844|CHV|||  
ACL|ACL|C0683459;C1412125|||C0683459;C1412125|AOD;HUGO;OMIM|||  
ACL|ACLY;ACLY gene;ATPCL;CLATP|C1412125|||C1412125|HUGO;MTH;OMIM|||  
ACL|ATP CITRATE LYASE;ATP citrate lyase;ATP-citrate lyase;ATP citrate  
synthase|C0004199;C1412125|||C1412125|HUGO;OMIM|1|0.009|  
ACL|Achievement Checklist|||||||1  
ACL|Adjective Check List;Adjective CheckList;adjective check  
list|C0683459|||C0683459|AOD;CHV;MTH|1|0.0082|1  
ACL|Allen Cognitive Level|||||||1  
ACL|American cutaneous leishmaniasis|C1328252|||||1|0.0301|  
ACL|accessory collateral ligament|||||||1  
ACL|acetyl-L-carnitine|C0524474|1|0.008|||1  
ACL|acromegaloid features, cutis verticis gyrata, corneal leukoma|||||||1

ACL|adenocarcinoma of the lung|C0152013|||||1|0.0043|  
ACL|anal canal length|||||||1  
ACL|anterior|C0205094|||||1|0.0043|  
ACL|anterior cruciate|||||1|0.0047|  
ACL|anterior cruciate  
ligament|C0078960;C1748452|1|0.984|C0078960;C1748452|CHV;FMA;MSH;MTH;NCI;SNOMEDC  
T;UWDA|1|0.6521|1  
ACL|anti-cardiolipin;anticardiolipin||1|0.002|||1|0.0886|1  
ACL|anti-cardiolipin antibody;anticardiolipin antibodies|C0162596|||||1|0.1897|  
ACL|antibodies to cardiolipin|||||1|0.009|  
AC|(drug) AC||1|0.322|||||  
AC|A||||C0560271|NCI|||  
AC|AC;ac;AC Regimen;AC regimen;Adriamycin-Cytosan Regimen;CA  
Regimen|C1879503|||C0003354;C0050385;C0560271;C1300813;C1412573;C1550738;C187950  
3|HL7V3.0;HUGO;LNC;MTH;NCI;OMIM;PDQ|||  
AC|AC DEFICIENCY;ACDase;ACID CDase;ASAH;ASAH1;ASAH1 gene;FLJ21558;N-  
ACYLSPHINGOSINE AMIDOHYDROLASE 1;N-ACYLSPHINGOSINE  
DEACYLASE;PHP32|C1412573|||C1412573|HUGO;MTH;OMIM|||  
AC|AC chemotherapy protocol;AC protocol;CA  
protocol;Cyclophosphamide/Doxorubicin;Doxorubicin/Cyclophosphamide;cyclophospham  
ide/doxorubicin;doxorubicin and cyclophosphamide;doxorubicin  
cyclophosphamide;cyclophosphamide/doxorubicin  
protocol|C0050385|||C0050385|CHV;MSH;MTH;NCI;PDQ|1|0.0077|  
AC|ACE;ACE|C0022709;C0201888|||C0050385|CSP;NCI;PDQ|||  
AC|ACID CERAMIDASE;acid ceramidase|C1412573;C2350443|||C1412573|OMIM|1|0.0033|  
AC|ACID CERAMIDASE DEFICIENCY;FARBER  
LIPOGRANULOMATOSIS|C0268255;C1412573|||C1412573|OMIM|||  
AC|AG||||C0003354|NCI|||  
AC|ANTIGUA AND BARBUDA;Antigua and Barbuda;Barbuda and  
Antigua||||C0003354|AOD;MSH;MTH;NCI;SNOMEDCT|||  
AC|ATG||||C0003354|NCI|||  
AC|Abdominal Circumference;Abdominal circumference;abdominal  
circumference|C1300813|1|0.004|C1300813|CHV;LNC;MTH;SNOMEDCT|||1  
AC|Abdominal circumference (observable entity)|||C1300813|SNOMEDCT|||  
AC|Acebutolol|C0000946|||||1|0.0037|  
AC|Acinetobacter calcoaceticus|C0085467|||||||1  
AC|Acre;acre;acres|C0560271;C2347175|||C0560271|CHV;HL7V3.0;MTH;NCI;SNOMEDCT|||  
AC|Acre British;[ACR\_BR]|C0560271|||C0560271|NCI|||  
AC|Acre International||||C0560271|NCI|||  
AC|Adriamycin and cyclophosphamide;adriamycin  
cyclophosphamide||1|0.236|||1|0.003|  
AC|Air Conduction;air conduction|C0234744|||C0234744|SNOMEDCT|1|0.0055|1  
AC|Antigua and Barbuda (geographic location)|||C0003354|SNOMEDCT|||  
AC|Ar|C2986463|||C0560271|NCI|||  
AC|Arachnoid cysts|C0078981|||||1|0.003|  
AC|Autographa californica|C2767814|||||1|0.0033|  
AC|Before Meal;Before Meals;Before meal;before meals;meal before;Before  
food;before food;food before;Preprandial;preprandial;ac - ante cibum;ante  
cibum;ante cibus|C1550738|1|0.084|C1550738|CHV;MTH;NCI;SNOMEDCT|||1  
AC|Before food (qualifier value)|||C1550738|SNOMEDCT|||  
AC|Before meal (qualifier value)|||C1550738|SNOMEDCT|||  
AC|CA||||C0050385|NCI;PDQ|||  
AC|CERAMIDASE DEFICIENCY|C0268255;C2936785|||C1412573|OMIM|||  
AC|CTX/DOX||||C0050385|NCI;PDQ|||  
AC|FARBER DISEASE|C0268255;C1412573;C2936785|||C1412573|OMIM|||  
AC|N-LAURYLSPHINGOSINE DEACYLASE DEFICIENCY|C1412573;C2936785|||C1412573|OMIM|||  
AC|N-acylsphingosine amidohydrolase (acid ceramidase) 1||||C1412573|HUGO|||

AC|NATO code for HCN|||||||1  
AC|abcoulomb|||||||1  
AC|abdominal compression|||||||1  
AC|aberrant crypts|||||1|0.0055|  
AC|ablation catheter|C0162563|||||||1  
AC|abrupt closure|||||||1  
AC|absorption coefficient|||||||1  
AC|absorptive cell|||||||1  
AC|abuse case|||||||1  
AC|accessory cell;accessory cells|C0003315|||C0003315|CSP;NCI|1|0.0373|  
AC|accommodative convergence|||||||1  
AC|acetate|C0000975|1|0.008|||1|0.0096|1  
AC|acetone|C0001002|||||1|0.0055|  
AC|acetyl|||||||1  
AC|acetylcholine|C0001041;C0523441|||C0001041;C0523441|AOD;CHV;CSP;FMA;LCH;LNC;M  
SH;MTH;NCI;NDFRT;RXNORM;SNOMEDCT;UWDA;VANDF|1|0.0052|  
AC|achaete|||||1|0.0074|  
AC|acid|C0001128|||||||1  
AC|acidified complement|||||||1  
AC|acidity|C0001128;C0847097;C0920750|||||||1  
AC|aconitine|C0001159|||||||1  
AC|acre (qualifier value)|||C0560271|SNOMEDCT|||  
AC|acromioclavicular|C0695640|1|0.316|C0695640|CHV|1|0.0251|1  
AC|acrylamide|C0050587|||||1|0.0037|  
AC|actinium|C0001246|||||||1  
AC|activated carbon;activated  
charcoal|C0001275|||C0001275|CHV;MSH;MTHSPL;NCI;NDFRT;RXNORM;SNOMEDCT|1|0.0354|1  
AC|activation coefficient|||||1|0.003|  
AC|activity coefficient|||||1|0.0033|  
AC|acupuncture clinic|||||||1  
AC|acute|C0205178|||C0205178;C1547229;C1547295|CHV;DXP;HL7V2.5;MTH;NCI;SNOMEDCT|  
||1  
AC|acute acalculous cholecystitis|C0267842|||||1|0.0018|  
AC|acute  
cholecystitis|C0149520|||C0149520|AOD;CHV;COSTAR;ICD9CM;MSH;NCI;NDFRT;SNOMEDCT|1  
|0.0144|1  
AC|adenocarcinoma|C0001418|||C0001418|AOD;CHV;CSP;CST;LCH;MSH;MTH;NCI;NDFRT;OMIM  
;SNOMEDCT|1|0.0568|1  
AC|adenylate  
cyclase|C0001492;C1382029|||C0001492;C1382029|AOD;CHV;CSP;MSH;MTH;NCI;NDFRT;SNOM  
EDCT|1|0.2107|1  
AC|adenylate cyclase activity|C1151015|||||1|0.0044|  
AC|adenyl cyclase|C0001492|||||1|0.1985|1  
AC|adherent cell;adherent cells|||||1|0.0081|1  
AC|adrenal  
cortex|C0001613|||C0001613|AOD;CHV;FMA;LCH;LNC;MSH;MTH;NCI;SNOMEDCT;UWDA|||1  
AC|adrenocorticoid|||||||1  
AC|aesthetic component|||||1|0.0103|  
AC|affinity chromatography|C0008551|||||1|0.0048|  
AC|aftercoming|||||||1  
AC|air chamber|||||||1  
AC|air changes|||||||1  
AC|air conditioning|C0001864|||C0001864|CHV;LCH;MSH|||  
AC|alcoholic  
cirrhosis|C0023891|||C0023891|AOD;CHV;COSTAR;MSH;NCI;NDFRT;SNOMEDCT|||1  
AC|alcoholic coma|C0394017|||||||1  
AC|all culture|||||||1

AC|allergic conjunctivitis|C0009766|||||1|0.0055|  
AC|allyl chloride|C0051228|||||1|0.0026|  
AC|alternating|C0332270|||||1|0.0033|  
AC|alternating current|C0442830|1|0.002|C0442830|CHV;SNOMEDCT|1|0.0428|1  
AC|alveolar crest|||||||1  
AC|ambulatory  
care|C0002423;C1555966|||C0002423;C1555966|AOD;CHV;CSP;HL7V3.0;MSH|||1  
AC|ambulatory controls|||||||1  
AC|ammonium chloride|C0002615|||||1|0.0018|  
AC|amniocentesis|C0002627|||C0002627|AOD;CHV;CSP;LCH;LNC;MEDLINEPLUS;MSH;NCI;SNO  
MEDCT|1|0.0077|  
AC|amygdaloid complex|C0002708|||||1|0.0048|  
AC|anchor cell|||||||1|0.0044|  
AC|anchored catheter|||||||1  
AC|anesthesia circuit|||||||1  
AC|angiocellular|||||||1  
AC|antecubital|C1549091|1|0.002|C1549091|HL7V2.5|||1  
AC|anterior|C0205094|||||1|0.0044|  
AC|anterior chamber|C0003151|||C0003151|CHV;CSP;LNC;MSH;NCI|1|0.0579|1  
AC|anterior cingulate|||||||1|0.0059|  
AC|anterior circulation|||||||1  
AC|anterior colporrhaphy|C0195224|||C0195224|CHV;MTHICD9;SNOMEDCT|||1  
AC|anterior column|||||||1  
AC|anterior  
commissure|C0152335;C1289546|||C0152335;C1289546|FMA;NCI;SNOMEDCT|1|0.024|1  
AC|anterior cruciate|||||||1  
AC|antibiotic concentrate|||||||1  
AC|anticholinergic|C0242896|||||||1  
AC|anticoagulant|C0003280;C0848112|||C0003280|CHV;CSP;LNC;NCI;NDFRT;SNOMEDCT|1|0  
.0063|1  
AC|anticoagulation|C0003281;C2917212;C2919015|1|0.002|||1|0.007|  
AC|anticomplement|C0052026|||||||1  
AC|anticomplementary|||||||1  
AC|anticonvulsant|C0003286|||||||1  
AC|antiinflammatory corticoid|||||||1  
AC|antiphlogistic corticoid|||||||1  
AC|aortic closure|||||||1  
AC|aortic coarctation|C0003492|||||1|0.0033|  
AC|aortic compliance|||||||1  
AC|aortic constriction|||||1|0.0085|  
AC|aortocoronary|C0450107|||C0450107|CHV;SNOMEDCT|||1  
AC|apatite cement|||||||1|0.0022|  
AC|arm circumference|||||||1|0.0081|1  
AC|arterial capillary|||||||1  
AC|arterial compliance|||||||1|0.0066|  
AC|articular cartilage|C0007303;C1281692|||||1|0.0111|  
AC|artificial circulation|C0868932|||||1|0.003|  
AC|asbestos cement|||||||1|0.0022|  
AC|ascending  
colon|C0227375|||C0227375|AOD;CHV;CSP;FMA;MSH;MTH;MTHMST;NCI;SNOMEDCT;UWDA|||1  
AC|assist control||1|0.018|||||1  
AC|asymptomatic carriers|||||||1|0.0033|  
AC|atrial contraction|||||||1  
AC|atriocarotid|||||||1  
AC|attenuation correction|C2986723|||||1|0.014|  
AC|attenuation-corrected|||||||1|0.0044|  
AC|atypical carcinoid|||||||1|0.0077|

AC|auditory  
cortex|C0004302|||C0004302|AOD;CHV;CSP;FMA;MSH;MTH;NCI;SNOMEDCT|1|0.024|  
AC|autoclave|C0179177|||1|  
AC|autologous cell|||1|  
AC|axillary clearance|||1|0.003|  
AC|axiocervical|||1|  
AC|azure C|C0052828|||1|  
AC|capacity|C1516240|||1|0.0059|  
AC|carcinoma|C0007097|||1|0.0052|  
AC|concentration|C0086045;C1446561|||1|0.0033|  
AC|control|C0009932;C0243148;C1550141;C1882979;C2587213|||1|0.0092|  
AC|cyclophosphamide doxorubicin (AC protocol);cyclophosphamide doxorubicin (AC) protocol|||C0050385|CHV||  
AC|maize Activator|||1|0.0063|  
AC|maize transposable element Activator|||1|0.0055|  
AC|nucleus accumbens|C0028633|||1|0.0037|  
AC|patients had alcoholic cirrhosis|||1|0.0004|  
ACTH|1-39 ACTH;ACTH (1-39);ACTH preparation;Adrenocorticotrophic hormone preparation;CCTROP;Corticotrophic hormone;Corticotrophic hormone;Corticotropin preparation;acth hormone;adrenocorticotrophic peptide;adrenotrophin;adrenotropin;adrenotropic hormone|C0001655|||C0001655|AOD;CHV;MSH;NDFRT;PDQ;SNOMEDCT|||  
ACTH|ACTH|||C0001655;C0201835;C1337111;C1523997;C1704793|AOD;CHV;CSP;FMA;HUGO;MSH;MTH;NCI;NDFRT;PDQ;SNOMEDCT;UWDA|||  
ACTH|ACTH - Adrenocorticotrophic hormone;adrenocorticotrophic hormone (ACTH);Adrenocorticotrophic Hormone;Adrenocorticotrophic hormone;Adrenocorticotrophic Hormone;Adrenocorticotrophic hormone;Hormone, Adrenocorticotrophic;Hormone, Adrenocorticotrophic;adrenocorticotrophic hormone;adrenocorticotrophic hormone|C0001655;C1523997;C2825093|1|1|C0001655;C0201835;C1337111;C1523997;C2825093|AOD;CHV;CSP;HUGO;MSH;NCI;NDFRT;PDQ;SNOMEDCT|1|0.543|1  
ACTH|ACTH measurement;Adrenocorticotrophic hormone level;Adrenocorticotrophic Hormone Measurement;Adrenocorticotrophic hormone measurement;Corticotropin measurement;acth test;acth testing|C0201835|||C0201835|CHV;MTH;NCI;SNOMEDCT|||  
ACTH|Adrenocorticotrophic;adrenocorticotrophic|||1|0.007|  
ACTH|Adrenocorticotrophic Hormone [Chemical/Ingredient]|||C0001655|NDFRT|||  
ACTH|Adrenocorticotrophic hormone (substance)|||C0001655|SNOMEDCT|||  
ACTH|Adrenocorticotrophic hormone measurement (procedure)|||C0201835|SNOMEDCT|||  
ACTH|Adrenocorticotropin;adrenocorticotropin;CORTICOTROPIN;Corticotrophin;Corticotrophins;Corticotropin;Corticotropins;corticotrophin;corticotrophins;corticotropin;corticotropins|C0001655;C1523997|||C0001655;C0201835;C1337111;C1523997|AOD;CHV;CSP;FMA;GO;HUGO;LNC;MSH;MTH;MTHSPL;NCI;NDFRT;PDQ;RXNORM;SNOMEDCT;UWDA;VANDF|1|0.4441|  
ACTH|CLIP|C0175722;C1705205|||C1337111;C1704793|HUGO;NCI|||  
ACTH|Corticotrophin (1-39);Corticotropin (1-39)|||C0001655|MSH;NDFRT|||  
ACTH|Corticotrophins (product)|||C0001655|SNOMEDCT|||  
ACTH|Corticotrophins (substance);Corticotropin (substance)|||C0001655;C1523997|SNOMEDCT|||  
ACTH|Corticotropin preparation (product)|||C0001655|SNOMEDCT|||  
ACTH|Corticotropin preparation (substance)|||C0001655|SNOMEDCT|||  
ACTH|LPH|C0023832;C1337111;C1416808|||C1337111|HUGO|||  
ACTH|MSH|||C1337111;C1704793|HUGO;NCI|||  
ACTH|NPP;POMC Gene;POMC gene|C1337111|||C1337111|HUGO;MTH;NCI|||  
ACTH|POC|C1337111;C1704793|||C1337111;C1704793|HUGO;LNC;NCI;OMIM|||  
ACTH|POMC|||C1337111;C1704793|HUGO;NCI;OMIM|||  
ACTH|POMC wt Allele|C1704793|||C1704793|MTH;NCI|||

ACTH|PRO-ACTH-  
ENDORPHIN;PROOPIOMELANOCORTIN;proopiomelanocortin|C0033195;C1337111|||C1337111|HUGO;OMIM|||  
ACTH|Proopiomelanocortin (Adrenocorticotropin/ Beta-Lipotropin/ Alpha-Melanocyte Stimulating Hormone/ Beta-Melanocyte Stimulating Hormone/ Beta-Endorphin) Gene|||C1337111|NCI|||  
ACTH|Proopiomelanocortin (Adrenocorticotropin/ Beta-Lipotropin/ Alpha-Melanocyte Stimulating Hormone/ Beta-Melanocyte Stimulating Hormone/ Beta-Endorphin) wt Allele|||C1704793|NCI|||  
ACTH|Recombinant Corticotropin;Therapeutic ACTH|C1523997|||C1523997|MTH;NCI|||  
ACTH|adrenocorticotropic hormone (ACTH) level test|||C0201835|CHV|||  
ACTH|alpha-melanocyte stimulating hormone|C0002302;C1337111|||C1337111|HUGO|||  
ACTH|beta-endorphin|C0005210;C1337111|||C1337111|HUGO|||  
ACTH|beta-lipotropin|C0023832;C1337111|||C1337111|HUGO|||  
ACTH|beta-melanocyte stimulating hormone|C0005261;C1337111|||C1337111|HUGO|||  
ACTH|plasma adrenocorticotrophin|||1|0.0059|  
ADA|ADA;Ada;Ada Lindl.;Genus  
Ada|C1060325|||C0001457;C0002456;C1060325;C1151644;C1412179;C1705019|GO;HUGO;MSH;MTH;NCBI;NCI;OMIM|||  
ADA|ADA - Adenosine deaminase|C0001457|||C0001457|SNOMEDCT|||  
ADA|ADA Gene;ADA gene;Adenosine Deaminase Gene;adenosine deaminase gene|C1412179|||C1412179|HUGO;MTH;NCI|1|0.0038|  
ADA|ADENOSINE AMINOHYDROLASE;Adenosine Aminohydrolase;Adenosine aminohydrolase;Aminohydrolase, Adenosine;adenosine aminohydrolase;ADENOSINE DEAMINASE;Adenosine Deaminase;Adenosine deaminase;Deaminase, Adenosine;adenosine deaminase|C0001457;C1412179|1|0.002|C0001457;C1412179|CHV;CSP;HUGO;LCH;LNC;MSH;MTH;NCI;NDFRT;OMIM;SNOMEDCT|1|0.6517|1  
ADA|Adenine Deaminase|C0001457;C0050739|||C0001457|NCI|||  
ADA|Adenosine Deaminase [Chemical/Ingredient]|||C0001457|NDFRT|||  
ADA|Adenosine deaminase (substance)|||C0001457|SNOMEDCT|||  
ADA|Adenosine deaminase activity|C1149733|||1|0.0159|  
ADA|American Dental Association;American association dental;Association, American Dental;Dental Association, American|C0002456|||C0002456|CHV;MSH;MTH;NCI|1|0.0257|  
ADA|American Diabetes Association|C1705019|1|0.992|C1705019|MTH;NCI|1|0.1002|  
ADA|Americans with Disabilities Act|||1|0.1846|1  
ADA|Americans with Disabilities Act of 1990|||1|0.0093|  
ADA|Azodicarbonamide|C0043716|||1|0.0055|  
ADA|DmpF;acetaldehyde dehydrogenase (acetylating) activity|C1151644|||C1151644|GO;MTH|||  
ADA|EC 3.5.4.4|||C0001457|NCI|||  
ADA|alcohol dependence and abuse|||1|0.0033|  
ADA|alternated delay acquisition|||1  
ADA|anterior descending artery|||1  
ADA|antideoxyribonucleic acid antibody|||1  
ADA|approved dietary allowance|||1  
ADD|4 Androstene 3,17 dione;4-Androstene-3,17-dione|||C0002860|MSH;NCI;NDFRT|||  
ADD|ADD;Add;Added|C1524062;C1883712|||C0002860;C0004269;C1524062;C1548443;C1720086;C1883712|HL7V2.5;LNC;MEDLINEPLUS;NCI;SNOMEDCT|||  
ADD|ADD action code|||C1548443|MTH|||  
ADD|ADIONE - Delta 4-androstenedione;Androstanedione;Delta 4-androstenedione;Delta-4-Androstenedione;delta 4 Androstenedione;delta-4-Androstenedione;Therapeutic Androstenedione;Therapeutic\_Androstenedione|C0002860|||C0002860|MSH;NCI;NDFRT;SNOMEDCT|||

ADD|ANDROSTENEDIONE;Androstenedione;androstenedione;androstenedione  
 (ADD)|C0002860;C0337432|||C0002860|AOD;CHV;CSP;LNC;MSH;MTH;NCI;NDFRT;RXNORM;SNOM  
 EDCT;VANDF|||  
 ADD|Add - dosing instruction fragment|||C1720086|MTH;SNOMEDCT|||  
 ADD|Add - dosing instruction fragment (qualifier value)|||C1720086|SNOMEDCT|||  
 ADD|Add - instruction  
 imperative;Addition;addition|C1883712|||C1883712|MTH;NCI|||1  
 ADD|Additional|C1524062|||C1524062|LNC;MTH;NCI|||  
 ADD|Androst-4-ene-3,17-dione|||C0002860|MSH;NCI;NDFRT|||  
 ADD|Androstenedione (substance)|||C0002860|SNOMEDCT|||  
 ADD|Androstenedione (substance)|||C0002860|SNOMEDCT|||  
 ADD|Androstenedione [Chemical/Ingredient]|||C0002860|NDFRT|||  
 ADD|Attention Deficit Disorder;attention deficit  
 disorder|C0041671;C0339002|1|0.99|||1|0.7991|1  
 ADD|Attention deficit disorder of childhood;Child attention deficit  
 disorder;Child attention deficit disorder NOS;child attention deficit disorder  
 (child ADD)|C0004269|||C0004269|CHV;ICD9CM;MTH;MTHICD9;SNOMEDCT|||  
 ADD|Child attention deficit disorder (disorder);Child attention deficit disorder  
 NOS (disorder)|||C0004269|SNOMEDCT|||  
 ADD|acceptable daily dose|||1  
 ADD|acute diarrheal disease|||1|0.0268|  
 ADD|adduction|C0231457|||1  
 ADD|adenosine deaminase|C0001457;C1412179|||1  
 ADD|afterdischarge duration|||1|0.0625|  
 ADD|alcohol and drug dependency|||1  
 ADD|androsta-1,4-diene-3,17-dione|||1|0.0402|  
 ADD|angled delivery device|||1  
 ADD|anterior disc displacement|||1|0.0491|  
 ADD|auditory discrimination|C0234747|||1  
 ADD|average daily dose|||1  
 ADD|delta4-Androstene-3,17-dione|||C0002860|NCI|||  
 ADD|let there be added|||1  
 ADD|surgical induction of anterior disk displacement|||1|0.0223|  
 ADHD|ADD - Attention deficit disorder with hyperactivity|||C1263846|SNOMEDCT|||  
 ADHD|ADDH;addh|C1263846;C2676242|||C1263846|CHV;CSP;MSH|||  
 ADHD|ADHD;ADHD (attention deficit hyperactivity disorder);ADHD - Attention  
 deficit disorder with hyperactivity;Attention deficit hyperactivity disorder  
 (ADHD);attention deficit hyperactivity disorder (ADHD);ATTENTION DEFICIT-  
 HYPERACTIVITY DISORDER;Attention Deficit Disorder with Hyperactivity;Attention  
 Deficit Disorders with Hyperactivity;Attention Deficit Hyperactivity  
 Disorder;Attention Deficit Hyperactivity Disorders;Attention deficit  
 hyperactivity disorder;attention deficit disorder with hyperactivity;attention  
 deficit hyperactivity disorder;Attention deficit hyperactivity disorder,  
 predominantly hyperactive impulsive type;Attention deficit hyperkinetic  
 disorder;Attention-Deficit Disorder, Predominantly Hyperactive-Impulsive  
 Type;Childhood hyperkinetic syndrome;Hyperkinetic syndrome of  
 childhood;childhood hyperkinetic syndrome;HYPERACTIVITY OF  
 CHILDHOOD;HYPERKINETIC SYNDROME;Hyperkinetic Syndrome;Hyperkinetic  
 syndrome;Hyperkinetic syndrome NOS;SYNDROME HYPERKINETIC;Syndromes,  
 Hyperkinetic;hyperkinetic syndrome;Hyperactive child syndrome;hyperactive child  
 syndrome;Hyperactivity Disorder NOS;disorder hyperactivity;hyperactivity  
 disorder;Hyperactivity Disorder, Predominantly Hyperactive-Impulsive  
 Type;Hyperkinetic disorder;hyperkinetic disorder;Overactive child  
 syndrome;Unspecified hyperkinetic syndrome of childhood;attention deficit hyper  
 disorder;attention deficit (hyper) disorder;attention deficits disorder  
 hyper|C1263846|1|0.998|C1263846|AOD;CHV;CSP;CST;ICD9CM;MEDLINEPLUS;MSH;MTH;MTHIC  
 D9;NDFRT;OMIM;SNOMEDCT|1|1|1

ADHD|ATTENTION DEFICIT DIS WITH HYPERACTIVITY;ATTENTION DEFICIT HYPERACTIVITY  
DIS|||C1263846|MSH|||  
ADHD|Attention Deficit Disorder with Hyperactivity  
[Disease/Finding]|||C1263846|NDFRT|||  
ADHD|Attention deficit disorder|C0041671;C0339002|||C1263846|SNOMEDCT|||  
ADHD|Attention deficit disorder (disorder)|||C1263846|SNOMEDCT|||  
ADHD|Attention deficit disorder of childhood with  
hyperactivity|||C1263846|ICD9CM|||  
ADHD|Attention deficit hyperactivity disorder (disorder)|||C1263846|SNOMEDCT|||  
ADHD|Attention deficit hyperactivity disorder, predominantly hyperactive  
impulsive type (disorder)|||C1263846|SNOMEDCT|||  
ADHD|Attn deficit w hyperact|||C1263846|ICD9CM|||  
ADHD|Childhood hyperkinetic syndrome (disorder)|||C1263846|SNOMEDCT|||  
ADHD|Hyperkinetic synd NOS|||C1263846|ICD9CM|||  
ADHD|Hyperkinetic syndrome NOS (disorder)|||C1263846|SNOMEDCT|||  
ADHD|[X]Hyperkinetic disorder, unspecified|||C1263846|SNOMEDCT|||  
ADHD|[X]Hyperkinetic disorder, unspecified (disorder)|||C1263846|SNOMEDCT|||  
ADHD|minimal brain dysfunction|C1263846;C1321905|||C1263846|CHV|||  
ADL|50-DAG;50kD DAG;DAG2;DYSTROGLYCAN 2;SCARMD1;SGCA;SGCA  
gene|C1420005|||C1420005|HUGO;LNC;MTH;OMIM|||  
ADL|A2|||C1420005|HUGO|||  
ADL|ADHALIN;adhalin;SARCOGLYCAN, ALPHA|C0248537;C1420005|||C1420005|HUGO;OMIM|||  
ADL|ADL;adl;adls|C0001288;C1420005|||C0001288;C1420005|CHV;CSP;LNC;MSH;NCI;OMIM;  
SNOMEDCT|||  
ADL|Activities of Daily Living;Activities, Daily Living;Activity of Daily  
Living;Activity of daily living;Activity, Daily Living;Daily Living  
Activities;Daily Living Activity;Living Activities, Daily;Living Activity,  
Daily;activities of daily living;activity of daily living;daily living  
activities;Activities of Daily Living (activity);Activities of everyday  
life;Household Activity;activities of daily living (ADL);functional  
ability|C0001288|1|0.988|C0001288|CHV;CSP;MSH;MTH;NCI;SNOMEDCT|1|0.935|1  
ADL|Activities of Daily Living Scale|||1|0.0084|  
ADL|Activity of daily living (function)|||C0001288|SNOMEDCT|||  
ADL|Activity of daily living (observable entity)|||C0001288|SNOMEDCT|||  
ADL|Activity of daily living, function (observable  
entity)|||C0001288|SNOMEDCT|||  
ADL|Amsterdam Depression List|||1|  
ADL|DMA2;LGMD2D|C1420005;C1842550|||C1420005|HUGO|||  
ADL|DYSTROPHIN-ASSOCIATED GLYCOPROTEIN, 50-KD|||C1420005|OMIM|||  
ADL|Daily Activity;daily activities|C0001288;C0871707|||C0001288|NCI|1|0.0038|  
ADL|Sarcoglycan, alpha (50kD dystrophin-associated glycoprotein;  
adhalin)|||C1420005|HUGO|||  
ADL|acid detergent lignin|||1|0.0122|  
ADL|activities of daily life|||1|0.0298|  
ADL|acute adenolymphangitis|||1|0.0046|  
ADL|adhalin (limb girdle muscular dystrophy 2D)|||C1420005|HUGO|||  
ADL|adolescent medicine|C0001581|||1|  
ADL|adrenoleukodystrophy|C0162309;C1412084|||1|  
ADL|aerobic dive limit|||1|0.0061|  
ADL|sarcoglycan, alpha (50kDa dystrophin-associated  
glycoprotein)|||C1420005|HUGO|||  
AFB|AFB - Acid fast bacillus;Acid-fast bacillus;acid fast bacillus;acid-fast  
bacilli;acid-fast  
bacillus;afb|C0483226|1|0.99|C0483226|CHV;MTH;SNOMEDCT|1|0.7925|1  
AFB|Acid-fast bacillus (organism)|||C0483226|SNOMEDCT|||  
AFB|acetate-free biofiltration|C0282467|||1|0.0608|  
AFB|aflatoxin B|C0085754|||1|

AFB|aflatoxin B1|C0085180|||||1|0.1279|  
AFB|aflatoxin biomarker|||||||1|  
AFB|air-fluidized bed|C0179267|||||||1|  
AFB|aortofemoral bypass|C0149619|||||1|0.0189|1|  
AFB|aspirated foreign body|C0686705|||||||1|  
AFB|scid-fast bacilli (AFB)||||C0483226|CHV|||  
AFI|acute febrile illness|||||||1|  
AFI|amaurotic familial idiocy|C0282220|||||||1|  
AFI|amniotic fluid index|C0552315|1|1.000|||1|0.9098|1|  
AFI|atrial flutter|C0004239;C1963068|||||1|0.0902|  
AFO|ankle-foot orthosis|1|1.000|||1|1|1|  
AFP|ACID FINGER PROTEIN;RNF95;TRIM26;TRIM26 gene;TRIPARTITE MOTIF-CONTAINING PROTEIN 26;ZINC FINGER PROTEIN 173, FORMERLY;ZNF173, FORMERLY|C1421661|||C1421661|HUGO;MTH;OMIM|||  
AFP|AFP|||C0002210;C0201539;C1367597;C1421661|AOD;DXP;HUGO;NCI;NDFRT;OMIM|||  
AFP|AFP - Alpha-fetoprotein;alpha-fetoprotein (AFP);ALPHA-FETOPROTEIN;Alpha Fetoprotein;Alpha fetoproteins;Alpha-Fetoprotein;Alpha-fetoprotein;Alpha-fetoprotein NOS;alfa-fetoprotein;alpha Fetoprotein;alpha Fetoproteins;alpha Foetoprotein;alpha fetoprotein;alpha fetoproteins;alpha foetoprotein;alpha-Fetoprotein;alpha-Fetoproteins;alpha-feto-protein;alpha-fetoprotein|C0002210;C0201539;C1367597|1|0.996|C0002210;C0201539;C1367597|AOD;CH V;CSP;HUGO;LCH;MSH;MTH;NCI;NDFRT;OMIM;SNOMEDCT|1|0.8558|1|  
AFP|AFP Gene;AFP gene;Alpha-Fetoprotein Gene|C1367597|||C1367597|HUGO;MTH;NCI|||  
AFP|AFP measurement;Alpha Fetoprotein measurement;Alpha Foetoprotein measurement;Alpha-fetoprotein Measurement;Alpha one fetoprotein measurement;Alpha-1-Fetoprotein measurement;Alpha-1-Foetoprotein measurement;alpha fetoprotein test;alpha fetoprotein testing|C0201539|||C0201539|CHV;MTH;NCI;SNOMEDCT|||  
AFP|Alpha one fetoprotein (AFP) test|||C0201539|CHV|||  
AFP|Alpha-1-Fetoprotein;alpha 1-fetoprotein;Alpha-Fetoglobulin;alpha1-fetoprotein|C0002210|||C0002210|LNC;NCI|1|0.0263|  
AFP|Alpha-1-Fetoprotein measurement (procedure)|||C0201539|SNOMEDCT|||  
AFP|Alpha-fetoprotein NOS (procedure)|||C0201539|SNOMEDCT|||  
AFP|FETA|C1367597;C1706654;C2828822|||C1367597|HUGO|||  
AFP|Fetuin;Fetuins;fetuin|C0002210;C3178998|||C0002210|AOD;CHV;CSP;NDFRT;SNOMEDCT|||  
AFP|Fetuin (substance)|||C0002210|SNOMEDCT|||  
AFP|Serum alphafoetoprotein;serum alphafetoprotein||||||1|0.0134|  
AFP|a-fetoprotein||||||1|0.0036|  
AFP|acute flaccid paralysis||||||1|0.0496|1|  
AFP|adiabatic fast passage|||||||1|  
AFP|alpha Fetoprotein (substance)|||C0002210|SNOMEDCT|||  
AFP|alpha-Fetoproteins [Chemical/Ingredient]|||C0002210|NDFRT|||  
AFP|anterior faucial pillar|||||||1|  
AFP|anterior fontanel pressure;anterior fontanelle pressure||||||1|0.0039|  
AFP|anterior forebrain pathway||||||1|0.0051|  
AFP|anti-alpha-fetoprotein||||||1|0.0042|  
AFP|antifreeze polypeptide||||||1|0.0036|  
AFP|antifreeze protein||||||1|0.0218|  
AFP|antifungal protein||||||1|0.0051|  
AFP|ascending frontal parietal|||||||1|  
AFP|atrial filling pressure|||||||1|  
AFP|atypical facial pain|C0154729|||C0154729|CHV;SNOMEDCT|1|0.0048|1|  
AFP|serum alpha-foetoprotein|C0373538;C0546833;C1287375||||||1|0.003|  
AFP|tripartite motif containing 26|||C1421661|HUGO|||  
AGA|18-alpha-glycyrrhetic acid||||||1|0.0092|  
AGA|AGA|||C0071561;C0162311;C1412276|HUGO;OMIM;PDQ|||

AGA|AGA gene;ASRG|C1412276|||C1412276|HUGO;MTH|||  
AGA|AGA1;ALOPECIA, ANDROGENETIC, 1;ANDROGENETIC ALOPECIA;Alopecia,  
Androgenetic;Androgenetic Alopecia;Androgenetic alopecia;alopecia  
androgenetic;androgenetic alopecia;Alopecia hereditaria;Alopecia, Male  
Pattern;Male Pattern Alopecia;Male pattern alopecia;male pattern  
alopecia;Androgenic alopecia;alopecia androgenic;androgenic alopecia;BALDNESS,  
MALE PATTERN;Baldness, Male Pattern;Male Pattern Baldness;Male pattern  
baldness;baldness male pattern;male pattern baldness;Common baldness;Hereditary  
alopecia;MPB;Pattern baldness;pattern  
baldness|C0162311|||C0162311|CHV;MSH;MTH;OMIM;SNOMEDCT|1|0.1048|1  
AGA|ALOPECIA ANDROGENET;ANDROGENET ALOPECIA|||C0162311|MSH|||  
AGA|ASPARYLGLUCOSAMINIDASE;aspartylglucosaminidase;GLYCOSYLASPARAGINASE;glycosy  
lasparaginase|C0004025;C1412276|||C1412276|HUGO;OMIM|1|0.0601|  
AGA|Alopecia hereditaria (disorder)|||C0162311|SNOMEDCT|||  
AGA|Androgenic alopecia (disorder)|||C0162311|SNOMEDCT|||  
AGA|Glutaminase-Asparaginase;Glutaminase-asparaginase;glutaminase-  
asparaginase;PEG-Glutaminase-Asparaginase;PEG-L-glutaminase-L-  
asparaginase;Polyethylene Glycol-Glutaminase-Asparaginase;polyethylene glycol-  
glutaminase-asparaginase;polyethyleneglycol-L-glutaminase-L-  
asparaginase|C0071561|||C0071561|MSH;MTH;NCI;PDQ|||  
AGA|Male pattern alopecia (disorder)|||C0162311|SNOMEDCT|||  
AGA|accelerated growth area|||1  
AGA|acetylglutamate|||1  
AGA|acute gonococcal arthritis|C2062407|||1  
AGA|allergic granulomatosis and angiitis|||1|0.0077|1  
AGA|allergic granulomatous angiitis|C0008728|||1|0.0169|  
AGA|anti-gliadin;antigliadin|||1|0.0601|  
AGA|anti-gliadin antibodies|C0312639|||1|0.0354|  
AGA|anti-immunoglobulin A autoantibody|||1  
AGA|antibodies to gliadin|||1|0.0139|  
AGA|antigliadin antibodies;antigliadin antibody|||1|0.114|1  
AGA|antiglomerular antibody|||1  
AGA|appropriate|C1548787|||1|0.0231|  
AGA|appropriate for gestational age|C2985271|1|1.000|C2985271|NCI|1|0.5378|1  
AGA|average gestational age|||1  
AGA|presents the official recommendations of the American Gastroenterological  
Association|||1|0.0169|  
AICD|AICD;aicd;aicds|C0972395;C2611803|||C0972395;C2611803|CHV;GO|||  
AICD|APP intracellular domain|||1|0.0388|  
AICD|Activation-induced cell death of T cells;activation-induced cell death of T  
cells;activation-induced cell death of T-cells|C2611803|||C2611803|GO;MTH|||  
AICD|Automatic Implantable Cardioverter-Defibrillators;DEFIBRILLATOR, AUTOMATIC  
IMPLANTABLE CARDIOVERTER;automatic implantable cardioverter  
defibrillator;automatic implantable cardioverter-  
defibrillator|C0972395|1|1|C0972395|MTH;SPN|1|0.3134|1  
AICD|activation-induced B cell apoptosis;activation-induced B-cell  
apoptosis|||C2611803|GO|||  
AICD|activation-induced cell death|||1|0.6478|1  
AICD|activation-induced cell death of B cells;activation-induced cell death of  
B-cells|||C2611803|GO|||  
AICD|activation-induced cell death of B lymphocytes;activation-induced cell  
death of B-lymphocytes|||C2611803|GO|||  
AICD|activation-induced cell death of T lymphocytes;activation-induced cell  
death of T-lymphocytes|||C2611803|GO|||  
AICD|automatic implanted cardioverter-defibrillator|||1  
AIDS|ACQUIRED IMMUNE DEFIC SYNDROME|||C0001175|MSH|||

AIDS|ACQUIRED IMMUNE DEFICIENCY SYNDROME;Acquired Immune Deficiency Syndrome;Acquired immune deficiency syndrome;Acquired immune deficiency syndrome, NOS;acquired immune deficiency syndrome;ACQUIRED IMMUNODEFICIENCY SYNDROME, AIDS;AIDS - Acquired immunodeficiency syndrome;AIDS, ACQUIRED IMMUNODEFICIENCY SYNDROME;acquired immunodeficiency syndrome (AIDS);AIDS;AIDS, NOS;AIDS (disorder);AIDS disorders;AUTOIMMUNE DEFICIENCY SYNDROME;autoimmune deficiency syndrome;Acquired Immune Deficiency;acquired immune deficiency;Acquired Immuno Deficiency Syndrome;Acquired Immuno-Deficiency Syndrome;Acquired Immuno-Deficiency Syndromes;Immuno-Deficiency Syndrome, Acquired;Immuno-Deficiency Syndromes, Acquired;Syndrome, Acquired Immuno-Deficiency;Syndromes, Acquired Immuno-Deficiency;acquired immuno-deficiency syndrome;Acquired Immunodeficiency Syndrome;Acquired Immunodeficiency Syndromes;Acquired immunodeficiency syndrome;Acquired immunodeficiency syndrome, NOS;Immunodeficiency Syndrome, Acquired;Immunodeficiency Syndromes, Acquired;Syndrome, Acquired Immunodeficiency;Syndromes, Acquired Immunodeficiency;acquired immunodeficiency syndrome;Acquired immune deficiency syndrome (AIDS);IMMUNE DEFICIENCY SYNDROME ACQUIRED <AIDS>;IMMUNE DEFICIENCY SYNDROME ACQUIRED AIDS;Immunodeficiency due to human immunodeficiency virus infection;Immunologic Deficiency Syndrome, Acquired|C0001175|1|0.992|C0001175|AOD;CHV;COSTAR;CSP;CST;MEDLINEPLUS;MSH;MTH;MT HICD9;NCI;NDFRT;QMR;RAM;SNOMEDCT|1|0.9954|1  
AIDS|ACQUIRED IMMUNO DEFIC SYNDROME|||C0001175|MSH|||  
AIDS|ACQUIRED IMMUNODEFIC SYNDROME;IMMUNODEFIC SYNDROME ACQUIRED|||C0001175|MSH|||  
AIDS|Acquired Immunodeficiency Syndrome [Disease/Finding]|||C0001175|NDFRT|||  
AIDS|Acquired human immunodeficiency virus infection syndrome NOS|||C0001175|SNOMEDCT|||  
AIDS|Acquired human immunodeficiency virus infection syndrome NOS (disorder)|||C0001175|SNOMEDCT|||  
AIDS|Acquired immune defic. synd.|||C0001175|SNOMEDCT|||  
AIDS|Acquired immune defic. syndr.|||C0001175|SNOMEDCT|||  
AIDS|Acquired immune deficiency syndrome (AIDS) (disorder)|||C0001175|SNOMEDCT|||  
AIDS|Acquired immune deficiency syndrome (disorder)|||C0001175|SNOMEDCT|||  
AIDS|Assessment of Intelligibility of Dysarthric Speech|||1  
AIDS|IMMUNOL DEFIC SYNDROME ACQUIRED|||C0001175|MSH|||  
AIDS|acquired immunodeficiency|C0596032|||1|0.0014|  
AIDS|acquired immunodeficiency disease|||1|0.0021|  
AIDS|acquired immunodeficiency virus|||1|0.0013|  
AIDS|hearing aids|C0018768|1|0.008|||  
AI|(class) AI||1|0.002|||  
AI|(stage) AI||1|0.002|||  
AI|AI;ai|C0003353;C0003504|||C0003139;C0003353;C0003504|CHV;MSH;NCI|||  
AI|AI - Aortic incompetence;AORTIC INSUFFICIENCY;Aortic Insufficiency;Aortic insufficiency;aortic insufficiency;AORTIC REGURGITATION;Aortic Regurgitation;Aortic regurgitation;Aortic regurgitation, NOS;Regurgitation, Aortic;aortic regurgitation;AORTIC VALVE INSUFFICIENCY;AORTIC VALVE, INSUFFICIENCY;Aortic Valve Insufficiency;Aortic valve insufficiency;Aortic valve insufficiency, NOS;Insufficiency, Aortic Valve;aortic valve insufficiency;AORTIC VALVE REGURGITATION;AORTIC VALVE, REGURGITATION;Aortic valve regurgitation;Aortic valve regurgitation, NOS;Regurgitation, Aortic Valve;aortic valve regurgitation;AORTIC VALVE, INCOMPETENCE;Aortic Valve Incompetence;Aortic valve incompetence;Aortic valve incompetence, NOS;Incompetence, Aortic Valve;aortic valve incompetence;AR - Aortic regurgitation;Aortic Incompetence;Aortic incompetence;Incompetence, Aortic;aortic incompetence|C0003504|1|0.972|C0003504|CHV;COSTAR;CSP;DXP;LCH;MSH;MTH;NCI;NDFRT; OMIM;SNOMEDCT|1|0.0547|1

AI|AIA;Anguilla island;Antigua|C0003353|||C0003353|MSH;MTH;NCI;SNOMEDCT|||  
AI|ANGUILLA;Anguilla|C0003025;C0003353|||C0003353|AOD;NCI|||  
AI|ANTAG|||C0003139|MSH|||  
AI|AR|C2986463|||C0003504|NCI|||  
AI|Adequate Intake|||1|0.0091|  
AI|Amelogenesis imperfecta|C0002452|||1|0.0397|  
AI|American Indian|C0002460|||1|0.0129|  
AI|Anguilla island (geographic location)|||C0003353|SNOMEDCT|||  
AI|Aortic Valve Insufficiency [Disease/Finding]|||C0003504|NDFRT|||  
AI|Aortic valve regurgitation (disorder)|||C0003504|SNOMEDCT|||  
AI|Apoptosis|C0162638|||1|0.0054|  
AI|Apoptotic|C1516044|||1|0.0059|  
AI|Artificial intelligence;artificial intelligence|C0003916|||1|0.0338|1  
AI|Astragalus Injection|||1|0.0038|  
AI|Axonal injury|||1|0.007|  
AI|acceleration index|||1|  
AI|acceptable intake|||1|  
AI|accidental injury|C0151736|||C0151736|AOD;CHV;CST;NCI;SNOMEDCT|||1  
AI|accidentally incurred|||1|  
AI|accommodative insufficiency|C0339687|||1|  
AI|acetabular index|||1|  
AI|active ingredient|C1292749;C1372955|||1|0.0204|  
AI|activity|C0026606;C0205177;C0439167;C0441655;C1561536|||1|0.0048|  
AI|acute ileus|||1|0.0064|  
AI|acute inflammation|C0333361|||1|  
AI|adiposity index|||1|  
AI|adrenal incidentalomas|||1|0.0043|  
AI|adrenal insufficiency|C0001623;C0405580|||1|0.0091|  
AI|after infection|||1|0.0027|  
AI|aggregation index|||1|  
AI|airway inflammation|||1|0.0032|  
AI|allelic imbalance|C0887935|||1|0.0676|  
AI|allergy and immunology|C0002112|||C0002112|MSH|||1  
AI|allergy index|||1|  
AI|aluminum|C0002367;C2348254|||1|0.0064|  
AI|amylogenesis imperfecta|||1|  
AI|anal index|||1|  
AI|anaphylatoxin  
inactivator|C0003766;C1413673|||C0003766;C1413673|MSH;NDFRT;OMIM;SNOMEDCT|||1  
AI|anaphylatoxin inhibitor|||1|  
AI|anchorage-independent|||1|0.0097|  
AI|androgen-independent|||1|0.0263|  
AI|angiogenesis inhibitor|C0596087|||C0596087|CHV;CSP;NCI;SNOMEDCT|||1  
AI|angiotensin I|C0003006|||1|0.1025|  
AI|angiotensin inhibitor|||1|  
AI|antagonists &  
inhibitors;inhibitor/antagonist|C0003139|||C0003139|CSP;MSH;MTH|||  
AI|anti-inflammatory|C0003209;C1515999|||1|0.0054|  
AI|anxiety index|||1|  
AI|apical impulse|C0277909|||1|  
AI|apnea index|||1|  
AI|apoptotic index;apoptotic indices|||1|0.1728|1  
AI|aromatase inhibitor|C0593802;C2757060|||1|0.0225|1  
AI|articulation index|||1|  
AI|artificial  
insemination|C0021587|1|0.004|C0021587;C0699895|AOD;CHV;CSP;ICD9CM;MEDLINEPLUS;M  
SH;MTH;NCI;SNOMEDCT|1|0.1797|1

AI|artificially inseminated|||||1|0.0139|  
AI|association-induction|||||1|0.0048|  
AI|atherogenic index|||||1|  
AI|atrial insufficiency|||||1|  
AI|autoimmune|C0443146|||C0443146|CHV;NCI;SNOMEDCT|||1|  
AI|autoimmunity|C0004368|||C0004368|CHV;CSP;MSH;NCI;SNOMEDCT|||1|  
AI|avian influenza|C0016627|||||1|0.0327|  
AI|avidity index|||||1|  
AI|axioincisal|||||1|  
AI|intensity|C0522510|||||1|0.0064|  
AI|primary|C0205225;C0439631|||||1|0.0107|  
AI|primary auditory area|||||1|0.0043|  
AI|primary auditory cortex|C2954070|||||1|0.1041|  
AI|primary auditory field|||||1|0.007|  
AKA|AKA;Aka;aka;Aka  
<sponge>|C1204024|||C1199284;C1204024;C1417685|HUGO;MTH;NCBI|||  
AKA|Aka (de Laubenfels, 1949)|||C1204024|NCBI|||  
AKA|Broussonetia papyrifera;broussonetia papyrifera;gou shu;paper mulberry tree;paper-mulberry|C1199284|||C1199284|CHV;MTH;NCBI|||  
AKA|Broussonetia papyrifera L'Her. ex Vent.||||C1199284|NCBI|||  
AKA|Math4C;NEUROD3;NEUROG1;NEUROG1 gene;NEUROGENIC DIFFERENTIATION 3;neurogenic differentiation 3;NEUROGENIN 1;neurogenin 1;NGN1;ngn1;bHLHa6|C1417685|||C1417685|HUGO;MTH;OMIM|||  
AKA|above-knee amputation|C0002691|1|0.968|C0002691|CHV;NCI|1|0.1481|1|  
AKA|alcoholic ketoacidosis|C0268039|||C0268039|AOD;SNOMEDCT|1|0.1667|1|  
AKA|all known allergies|||||1|  
AKA|alpha-alkokainic acid|C2350922|||||1|  
AKA|also known as||1|0.030||||1|  
AKA|antikeratin antibodies;antikeratin antibody|||||1|0.6852|1|  
ALD|ADRENOLEUKODYSTROPHY;Adrenoleukodystrophy;Adrenoleukodystrophies;Adrenoleukodystrophy;adreno-leukodystrophy;adrenoleukodystrophy;adrenoleukodystrophy;ALD (Adrenoleukodystrophy);ALDs (Adrenoleukodystrophy);adrenoleukodystrophy (ALD)|C0162309;C1412084|1|0.176|C0162309;C1412084|CHV;CSP;HUGO;MEDLINEPLUS;MSH;MTH;NCI;NDFRT;OMIM;SNOMEDCT|1|0.0338|1|  
ALD|ALD;ald;Addison-Schilder disease;Adrenoleukodystrophies, X-Linked;Adrenoleukodystrophy, X-Linked;X Linked Adrenoleukodystrophy;X-Linked Adrenoleukodystrophies;X-Linked Adrenoleukodystrophy;X-linked adrenoleukodystrophy;X-linked adrenoleukodystrophy;Schilder Addison Complex;Schilder-Addison Complex;Schilder-Addison complex|C0162309|||C0162309|CHV;CSP;MSH;MTHICD9;NDFRT;OMIM;SNOMEDCT|1|0.1352|  
ALD|Adrenoleukodystrophy (disorder)|||C0162309|SNOMEDCT|||  
ALD|Adrenoleukodystrophy [Disease/Finding]||||C0162309|NDFRT|||  
ALD|acetyl lysergic acid diethylamide||1|0.002|||||  
ALD|ad lib on demand||1|0.814|||||  
ALD|adrenomyeloneuropathy|C0162309;C1527231|||C0162309|CHV|||  
ALD|alcoholic liver disease|C0023896|||C0023896|CHV;COSTAR;MSH;NCI;SNOMEDCT|1|0.4253|1|  
ALD|aldolase|C0016762|||C0016762;C0201839|AOD;CHV;CSP;LNC;MSH;NCI;NDFRT;SNOMEDCT|1|0.1032|1|  
ALD|aldosine|C0295644|||C0295644|MSH|||  
ALD|aldosterone|C0002006|||||1|  
ALD|anterior|C0205094|||||1|0.0267|  
ALD|anterior latissimus dorsi|||||1|0.194|1|  
ALD|anterior latissimus dorsi muscle|||||1|0.016|  
ALD|appraisal of language disturbances|||||1|  
ALD|approximate lethal dose|||||1|  
ALD|assistive listening device|C0493583|||||1|

ALD|atomic layer deposition|||||1|0.0196|  
ALD|average lens density|||||1|  
ALD|melanodermic leukodystrophy|C0162309;C2931920|||C0162309|CHV|||  
ALD|plasma aldosterone|||||1|0.0463|  
ALS|ACID-LABILE SUBUNIT;acid labile subunit;acid-labile subunit;ACID-LABILE  
SUBUNIT DEFICIENCY;IGFALS;IGFALS gene;IGFBP,  
SOLUBLE|C1456383|||C1456383|HUGO;MTH;OMIM|1|0.0073|1  
ALS|ALG;Antilymphocyte Serum;Antilymphocyte Serums;Antilymphocyte serum;Serum,  
Antilymphocyte;Serums, Antilymphocyte;anti-lymphocyte serum;antilymphocyte  
sera;antilymphocyte  
serum|C0003372|||C0003372|CSP;MSH;MTH;NCI;NDFRT;SNOMEDCT|1|0.063|1  
ALS|ALS|||C0002736;C0003372;C1456383;C1704945|CHV;CSP;DXP;HUGO;MEDLINEPLUS;MSH;  
NCI;OMIM|||  
ALS|ALS (Amyotrophic Lateral Sclerosis);ALS - Amyotrophic lateral  
sclerosis;AMYOTROPHIC LATERAL SCLEROSIS;Amyotrophic Lateral  
Sclerosis;Amyotrophic lateral sclerosis;Sclerosis, Amyotrophic  
Lateral;amyotrophic lateral sclerosis;amyotrophic laterals sclerosis;Bulbar  
motor neuron disease;Motor neuron disease, bulbar;Disease, Lou-Gehrigs;LOU  
GEHRIG DISEASE;Lou Gehrig Disease;Lou Gehrig's Disease;Lou Gehrig's disease;Lou-  
Gehrigs Disease;lou gehrig disease;lou gehrig's disease;lou gehrigs  
disease;Gehrig Disease;Gehrig's Disease;Gehrigs Disease;Lateral Scleroses,  
Amyotrophic;Motor Neuron Disease, Amyotrophic Lateral  
Sclerosis|C0002736|1|0.994|C0002736|AOD;CHV;COSTAR;CSP;DXP;ICD9CM;LCH;MEDLINEPLU  
S;MSH;MTH;MTHICD9;NCI;NDFRT;OMIM;SNOMEDCT|1|0.836|1  
ALS|ALS1|C1704945;C1862939|||C1704945|NCI|||  
ALS|Amyotrophic Lateral Sclerosis [Disease/Finding]||||C0002736|NDFRT|||  
ALS|Amyotrophic Lateral Sclerosis/Progressive Muscular  
Atrophy||||C0002736|QMR|||  
ALS|Amyotrophic lateral sclerosis (disorder)||||C0002736|SNOMEDCT|||  
ALS|Amyotrophic sclerosis||||C0002736|ICD9CM|||  
ALS|Antilymphocyte Globulin|C0003370;C0003372|||C0003372|NCI|||  
ALS|Antilymphocyte Serum [Chemical/Ingredient]||||C0003372|NDFRT|||  
ALS|GEHRIGS DIS||||C0002736|MSH|||  
ALS|INSULIN-LIKE GROWTH FACTOR-BINDING PROTEIN, ACID-LABILE SUBUNIT;insulin-like  
growth factor binding protein, acid labile  
subunit|C0170857;C1456383|||C1456383|HUGO;OMIM|||  
ALS|IPOA|C1420306;C1704945|||C1704945|NCI|||  
ALS|LOU GEHRIG DIS;LOU GEHRIGS DIS||||C0002736|MSH|||  
ALS|Lou Gehrig's disease (ALS)||||C0002736|CHV|||  
ALS|MOTOR NEURON DIS AMYOTROPHIC LATERAL SCLEROSIS||||C0002736|MSH|||  
ALS|SOD||||C1704945|NCI|||  
ALS|SOD1 wt Allele|C1704945|||C1704945|MTH;NCI|||  
ALS|Superoxide Dismutase 1, Soluble (Amyotrophic Lateral Sclerosis 1 (Adult)) wt  
Allele||||C1704945|NCI|||  
ALS|acetolactate synthase|C0000999|||||1|0.0156|  
ALS|acute lateral sclerosis|||||1|  
ALS|advanced life support|C0419055|1|0.006|C0419055|CHV;SNOMEDCT|1|0.0726|1  
ALS|afferent loop syndrome|C0001727|||C0001727|CHV;DXP;MSH;NDFRT;SNOMEDCT|||1  
ALS|alternating least squares|||||1|0.0032|  
ALS|angiotensin-like substance|||||1|  
ALS|antennal lobes|||||1|0.0022|  
ALS|anterolateral sclerosis|||||1|  
ALS|anticipated lifespan|||||1|  
ALS|antiviral lymphocyte serum|||||1|  
ALS|atypical lichenoid stomatitis|||||1|  
ALT|AAT1||||C0001899|NCI|||

ALT|ALAT - Alanine aminotransferase;ALT;alt;alts;ALT - Alanine aminotransferase;alt alanine aminotransferase;Alanine 2 Oxoglutarate Aminotransferase;Alanine-2-Oxoglutarate Aminotransferase;Aminotransferase, Alanine-2-Oxoglutarate;Alanine Transaminase;Alanine transaminase;Transaminase, Alanine;alanine transaminase;GPT;gpt;gpts;Glutamic Alanine Transaminase;Glutamic-Alanine Transaminase;Glutamic-alanine transaminase;Transaminase, Glutamic-Alanine;glutamic alanine transaminase;Glutamic Pyruvic Transaminase;Glutamic-Pyruvic Transaminase;Glutamic-pyruvic transaminase;Transaminase, Glutamic-Pyruvic;glutamic pyruvic transaminase;glutamic-pyruvic transaminase;transaminase glutamic-pyruvic;Glutamic-Pyruvate Transaminase;S-ALAT;s-alat;alanine transaminase  
(ALT)|C0001899||C0001899;C0201836;C0376147;C2257651|AOD;CHV;CSP;GO;MSH;MTH;NCI;NDFRT;SNOMEDCT|||  
ALT|ALT measurement;alt measurement;Alanine Aminotransferase Measurement;Alanine aminotransferase measurement;GPT measurement;Glutamic pyruvate transaminase measurement;SGPT measurement|C0201836||C0201836|CHV;MTH;NCI;SNOMEDCT|||  
ALT|ALT1;Glutamate pyruvate transaminase;glutamate pyruvate transaminase|C0001899;C1415274||C0001899|AOD;CHV;NCI;SNOMEDCT|||  
ALT|Alanine Aminotransferase;Alanine aminotransferase;Aminotransferase, Alanine;alanine amino transferase;alanine aminotransferase;alanine-aminotransferase|C0001899;C0057041|1|1|C0001899;C0201836|AOD;CHV;CSP;LNC;MSH;MTH;NCI;NDFRT;SNOMEDCT|1|0.1184|1  
ALT|Alanine Transaminase [Chemical/Ingredient]|||C0001899|NDFRT|||  
ALT|Alanine aminotransferase (substance)|||C0001899|SNOMEDCT|||  
ALT|Alanine aminotransferase measurement (procedure)|||C0201836|SNOMEDCT|||  
ALT|GPT1|||C0001899|NCI|||  
ALT|L-Alanine:2-oxoglutarate aminotransferase;L-alanine:2-oxoglutarate aminotransferase|||C0001899|MSH;NDFRT;SNOMEDCT|||  
ALT|L-alanine:2-oxoglutarate aminotransferase activity;alanine aminotransferase activity;alanine transaminase activity;alanine-alpha-ketoglutarate aminotransferase activity;alanine-pyruvate aminotransferase activity;pyruvate-alanine aminotransferase activity|C2257651||C2257651|GO;MTH|1|0.0171|  
ALT|SGPT|||C0001899;C0201836;C0376147|CHV;MSH;MTH;NCI;SNOMEDCT|||  
ALT|SGPT (ALT)|||C0376147|NCI|||  
ALT|SGPT - Glutamate pyruvate transaminase;alanine transferase;serum glutamate pyruvate transaminase;serum glutamate pyruvate transaminase (SGPT)|C0376147||C0376147|CHV;MTH;NCI;SNOMEDCT|||  
ALT|Serum alanine aminotransferase|||1|0.5431|  
ALT|Serum alanine transaminase|||1|0.1109|  
ALT|alanine aminotransaminase|||1|0.0133|  
ALT|alanine aminotransferase (ALT) level test|||C0201836|CHV|||  
ALT|alternate|C0332270;C1523987|||1|  
ALT|alternative lengthening of telomeres|||1|0.0341|  
ALT|altitude|C0002349;C1649428|||1|0.0085|1  
ALT|anterolateral thigh|||1|0.0123|  
ALT|anterolateral tract|||1|  
ALT|antibiotic lock technique|||1|  
ALT|argon laser trabeculopexy|||1|  
ALT|argon laser trabeculoplasty|C1319234|||1|0.1062|1  
ALT|autolymphocyte therapy|||1|0.0152|1  
ALT|auxiliary liver transplantation|||1|0.0076|  
ALT|avian laryngotracheitis|||1|  
ALT|serum alanine transferase|||1|0.0133|  
AMA|AMA|C0002461;C0279755;C2825862||C0002461;C0279755;C2825862|MSH;NCI;PDQ|||  
AMA|ARA-C/L-PAM|||C0279755|NCI;PDQ|||

AMA|American Medical Association;American association medical;Association, American Medical;Medical Association, American|C0002461|||C0002461|CHV;MSH;MTH;NCI|1|0.286|

AMA|Antimitochondrial Antibodies;antimitochondrial antibodies;antimitochondrial antibody;Mitochondrial Antibody|C0312621;C2825862|1|0.05|C2825862|NCI|1|0.2882|1

AMA|Antimitochondrial Antibody Measurement|C2825862|||C2825862|MTH;NCI|||

AMA|Antimitochondrial autoantibodies|||1|0.0409|

AMA|Cytarabine/Melphalan;cytarabine/melphalan|C0279755|||C0279755|MTH;NCI;PDQ|||

AMA|actual mechanical advantage|||1|

AMA|advanced maternal age||1|0.062||1|0.0301|1

AMA|against medical advice||1|0.888||1|0.0989|1

AMA|alkaline membrane assay|||1|

AMA|amantadine|C0002403|||1|0.0366|

AMA|anti-mitochondrial;antimitochondrial|||1|0.0409|

AMA|anti-mitochondrial antibodies|||1|0.114|

AMA|antimyosin antibody|||1|

AMA|antithyroid microsomal antibody|||1|

AMA|apocrine membrane antigen|||1|

AMA|arm muscle area|||1|0.0645|1

AMA|augmentation of mandibular angle|||1|

AMA|autoregressive moving average|||1|

AML|ACUTE MYELOBLASTIC LEUKEMIA;Acute Myeloblastic Leukemia;Acute Myeloblastic Leukemias;Acute myeloblastic leukaemia;Acute myeloblastic leukemia;LEUKEMIA ACUTE MYELOBLASTIC;LEUKEMIA MYELOBLASTIC ACUTE;LEUKEMIA, MYELOBLASTIC, ACUTE;Leukemia, Acute Myeloblastic;Leukemia, Myeloblastic, Acute;Leukemias, Acute Myeloblastic;Myeloblastic Leukemia, Acute;Myeloblastic Leukemias, Acute;acute myeloblastic leukemia;ACUTE MYELOGENOUS LEUKEMIA;Acute Myelogenous Leukemia;Acute Myelogenous Leukemias;Acute myelogenous leukaemia;Acute myelogenous leukemia;LEUKEMIA, ACUTE MYELOGENOUS;LEUKEMIA, MYELOGENOUS, ACUTE;Leukemia, Acute Myelogenous;Leukemia, Myelogenous, Acute;Leukemias, Acute Myelogenous;Myelogenous Leukemia, Acute;Myelogenous Leukemias, Acute;acute myelogenous leukaemia;acute myelogenous leukemia;AML;AML, NOS;aml;AML - Acute Myeloid Leukemia;AML - Acute myeloid leukaemia;AML - Acute myeloid leukemia;AML - Acute myeloblastic leukaemia;AML - Acute myeloblastic leukemia;ANLL;anll;Acute Myelocytic Leukemia;Acute Myelocytic Leukemias;Acute myelocytic leukaemia;Acute myelocytic leukemia;LEUKEMIA, MYELOCYTIC, ACUTE;Leukemia, Acute Myelocytic;Leukemia, Myelocytic, Acute;Leukemias, Acute Myelocytic;Myelocytic Leukemia, Acute;Myelocytic Leukemias, Acute;acute myelocytic leukaemia;acute myelocytic leukemia;Acute Nonlymphoblastic Leukemia;Acute Nonlymphoblastic Leukemias;Leukemia, Acute Nonlymphoblastic;Leukemia, Nonlymphoblastic, Acute;Leukemias, Acute Nonlymphoblastic;Nonlymphoblastic Leukemia, Acute;Nonlymphoblastic Leukemias, Acute;acute nonlymphoblastic leukemia;Acute Nonlymphocytic Leukemia;Acute Nonlymphocytic Leukemias;Acute non-lymphocytic leukaemia;Acute non-lymphocytic leukemia;Leukemia, Acute Nonlymphocytic;Leukemia, Nonlymphocytic, Acute;Leukemias, Acute Nonlymphocytic;Nonlymphocytic Leukemias, Acute;acute non-lymphocytic leukemia;acute nonlymphocytic leukemia;leukemia, acute nonlymphocytic;Acute granulocytic leukaemia;Acute granulocytic leukemia;LEUKEMIA, GRANULOCYTIC, ACUTE;acute granulocytic leukemia;Acute myeloid leukaemia - category;Acute myeloid leukemia - category;Acute myeloid leukaemia, disease;Acute myeloid leukemia, disease;Acute myeloid leukaemia, no ICD-0 subtype;Acute myeloid leukemia, no ICD-0 subtype;acute leukemias non lymphoblastic;acute non-lymphoblastic leukemia;non-lymphoblastic leukemia acute;acute myelogenous leukemia (AML);acute nonlymphocytic leukemia (ANLL)|C0023467|1|1|C0023467|CHV;COSTAR;CSP;CST;DXP;MEDLINEPLUS;MSH;MTH;NCI;NDFRT;OMIM;PDQ;QMR;SNOMEDCT|1|0.2615|1

AML|Acute Myeloid Leukemia;Acute Myeloid Leukemia NOS;Acute Myeloid Leukemia, NOS;Acute Myeloid Leukemias;Acute myeloid leukaemia;Acute myeloid leukemia;LEUKEMIA, ACUTE MYELOID;LEUKEMIA, MYELOID, ACUTE;Leukemia, Acute Myeloid;Leukemia, Myeloid, Acute;Leukemias, Acute Myeloid;Myeloid Leukemia, Acute;Myeloid Leukemias, Acute;Myeloid leukemia, acute;acute myeloid leukaemia;acute myeloid leukemia;acute myeloid leukemias;leukemia, acute myeloid;Acute Myeloid Leukemia Not Otherwise Specified|C0023467;C2984331||C0023467;C2984331|CHV;CSP;DXP;ICD9CM;MEDLINEPLUS;MSH;NCI;NDFRT;OMIM;PDQ;SNOMEDCT|1|0.7104|

AML|Acute Myeloid Leukemia Not Otherwise Categorized||||C0023467|NCI|||

AML|Acute myeloblastic leukemia (disorder)||||C0023467|SNOMEDCT|||

AML|Acute myeloid leukemia - category (morphologic abnormality)||||C0023467|SNOMEDCT|||

AML|Acute myeloid leukemia, disease (disorder)||||C0023467|SNOMEDCT|||

AML|Acute myeloid leukemia, no ICD-O subtype (morphologic abnormality)||||C0023467|SNOMEDCT|||

AML|Amlodipine;amlodipine|C0051696||C0051696|CHV;CSP;LNC;MSH;MTHSPL;NCI;NDFRT;RXNORM;SNOMEDCT;USPMG;VANDF|1|0.0022|

AML|Hematopoietic - Acute Myelogenous Leukemia (AML)||||C0023467|NCI|||

AML|Leukemia, Myeloid, Acute [Disease/Finding]||||C0023467|NDFRT|||

AML|[M]Acute myeloid leukaemia;[M]Acute myeloid leukemia||||C0023467|SNOMEDCT|||

AML|[M]Acute myeloid leukaemia (disorder)||||C0023467|SNOMEDCT|||

AML|acute monoblastic leukemia|C0023465;C0457334|||||1

AML|acute monocytic leukemia|C0023465;C1318544|||||1

AML|acute mucosal lesion|||||1

AML|acute myeloblastic|||||1|0.0024|

AML|acute myelogenous|||||1|0.0014|

AML|acute myeloid|||||1|0.0046|

AML|acute myeloid leukemic|||||1|0.0033|

AML|anatomic medullary locking|||||1|0.0019|1

AML|angiomyolipoma|C0206633||C0206633|CHV;MSH;NCI;NDFRT;PDQ;SNOMEDCT|||1

AML|anterior mitral leaflet|C0225950;C1305164||C0225950;C1305164|FMA;SNOMEDCT;UWDA|1|0.0045|1

AML|automated multitest laboratory|||||1

AML|renal angiomyolipoma|C0241961|||||1|0.0079|

AM|ACTIVATING TRANSCRIPTION FACTOR 7-INTERACTING PROTEIN;activating transcription factor 7 interacting protein;ATF7-INTERACTING PROTEIN;ATF7IP;ATF7IP gene;FLJ10688;MCAF1;p621|C1426677||C1426677|HUGO;MTH;OMIM|||

AM|ADM|||C1412244|HUGO;OMIM|||

AM|ADM gene|C1412244||C1412244|HUGO;MTH|||

AM|ADRENOMEDULLIN;adrenomedullin|C0215825;C1412244||C1412244|HUGO;OMIM|1|0.1924|1

AM|AM;Am;am|||C0002467;C0003798;C0332170;C0487769;C1412244;C1426677;C2346872|HL7V3.0;HUGO;LNC;NCI;OMIM|||

AM|AM AG;Am Ag|||C0487769|LNC|||

AM|AM antigen;Am Antigen|||C0487769|LNC;MTH|||

AM|ARM|C0446516;C1140618;C1269078;C1269612|||C0003798|NCI|||

AM|ARMENIA;Armenia;armenia;Armenian S.S.R.;Armenian SSR|C0003798||C0003798|AOD;CHV;LCH;MSH;MTH;NCI;SNOMEDCT|||

AM|ATFA MODULATOR, MOUSE, HOMOLOG OF|||C1426677|OMIM|||

AM|Am element|||C0002467|CSP|||

AM|Americium;Americium, NOS;americium|C0002467||C0002467|AOD;CSP;LCH;MSH;MTH;NCI;NDFRT;SNOMEDCT|||1

AM|Americium (substance)|||C0002467|SNOMEDCT|||

AM|Americium [Chemical/Ingredient]||||C0002467|NDFRT|||

AM|Americium, NOS||||C0002467|SNOMEDCT|||

AM|Armenia (geographic location)||||C0003798|SNOMEDCT|||  
AM|Astragalus membranaceus|C0949831||||1|0.0097|  
AM|Attometer|C2346872|||C2346872|MTH;NCI|||  
AM|Austin Moore||||||1|  
AM|Autobiographical Memory|C0561843||||1|0.0023|  
AM|During morning;In the morning;Morning;in the morning;morning;ante meridiem;om  
- omni mane|C0332170|||C0332170|AOD;CHV;MTH;NCI;SNOMEDCT|1|0.0184|  
AM|MBD1-CONTAINING CHROMATIN-ASSOCIATED FACTOR|||C1426677|OMIM|||  
AM|MCAF|C1337092;C1426677;C1522558;C1705079|||C1426677|OMIM|||  
AM|Morning (qualifier value)|||C0332170|SNOMEDCT|||  
AM|Sinusoidally amplitude-modulated||||1|0.0037|  
AM|acetoxymethyl||||1|0.0074|  
AM|acetoxymethyl ester||||1|0.0094|  
AM|acrylamide|C0050587||||1|0.0047|1|  
AM|actomyosin|C0001291;C1325607||||1|0.0043|1|  
AM|acute myelofibrosis|C0334674||||1|  
AM|adhesion molecules||||1|0.007|  
AM|adrenal medulla|C0001629||||1|0.0084|  
AM|adriamycin|C0085752||||1|0.0097|  
AM|adult male||||||1|  
AM|adult monocyte||||||1|  
AM|aerosol mask||||||1|  
AM|aerospace medicine|C0001713;C1555853||||||1|  
AM|akinetism|C0001889||||||1|  
AM|alternative medicine|C0002346||||1|0.0037|1|  
AM|alveolar|C1440080||||1|0.0033|  
AM|alveolar macrophage;alveolar  
macrophages|C0085236|||C0085236|CHV;CSP;FMA;MSH;NCI;SNOMEDCT|1|0.4788|1|  
AM|alveolar mucosa||||||1|  
AM|am - ante meridiem|||C0332170|SNOMEDCT|||  
AM|amacrine cell|C0229216||||||1|  
AM|amalgam|C0440138;C0580619||||||1|  
AM|ambulatory monitoring|C0242882||||1|0.0027|  
AM|ametropia|C1527310||||||1|  
AM|aminopyrine|C0002586||||1|0.0033|  
AM|amiodarone|C0002598||||1|0.018|  
AM|ammeter||||||1|  
AM|amnion|C0002630||||||1|  
AM|amniotic membrane|C0002630;C1305379||||1|0.0214|  
AM|amphetamine|C0002658;C0002667||||1|0.0104|  
AM|ampicillin|C0002680||||1|0.005|  
AM|amplitude|C2346753||||||1|  
AM|amplitude modulated||||1|0.0097|  
AM|amplitude modulation||||1|0.0277|1|  
AM|amygdala|C0002708||||1|0.0321|  
AM|amygdaloid||||1|0.0057|  
AM|amyl||||||1|  
AM|amylase|C0002712||||1|0.004|  
AM|anovular menstruation|C0404557||||||1|  
AM|anterior midpapillary||||||1|  
AM|anteromeatal||||||1|  
AM|anteromedial|C1179847||||1|0.007|  
AM|anteromedial nucleus|C0228319||||1|0.0023|  
AM|antimycotic||||||1|  
AM|apparent motion||||1|0.007|  
AM|arabinomannan|C0052278||||||1|  
AM|arbuscular mycorrhiza||||1|0.004|

AM|arbuscular mycorrhizal|||||1|0.0551|  
AM|arithmetic mean|||||1|0.0033|1  
AM|arousal mechanism|||||1|  
AM|artemether|C0052429|||||1|0.003|  
AM|arterial malformation|C0151489|||||1|  
AM|arterial mean|||||1|  
AM|articulation manipulation|||||1|  
AM|aseptic meningitis|C0025290|||||1|0.0084|  
AM|aseptic meningo-encephalitis|||||1|0.0027|  
AM|aseptic meningoencephalitis|||||1|0.004|  
AM|atrial myxoma|C0151241|||||1|  
AM|attitude to medication|||||1|  
AM|aviation medicine|C0004431|||||1|  
AM|axiomesial|||||1|  
AM|before noon||1|0.980||||1|  
AM|mane|C0222048;C0332170|||C0332170|SNOMEDCT|||  
AM|meter angle|||||1|  
AM|mixed astigmatism|||||1|  
AM|myopic astigmatism|||||1|  
ANA|ABUNDANT IN NEUROEPITHELIUM AREA;B-CELL TRANSLOCATION GENE 3;BTG family,  
member 3;BTG3;BTG3 gene;TOB5|C1412840|||C1412840|HUGO;MTH;OMIM|||  
ANA|ANA;Ana;ana|||C0002463;C0003243;C0702121;C1412840;C1882141|CHV;CST;HUGO;MSH  
;NCI;OMIM;SNOMEDCT|||  
ANA|ANA - Anti-nuclear antibody;ANF - Anti-nuclear factor;Anti-nuclear  
antibodies;Anti-nuclear antibody;anti-nuclear antibody;Antinuclear  
Autoantibody;antinuclear autoantibodies;antinuclear autoantibody;Antinuclear  
Factor;Antinuclear Factors;Antinuclear factor;Factor, Antinuclear;Factors,  
Antinuclear;antinuclear factor;antinuclear factors;antiDNA  
autoantibody;antinuclear antibody (ANA);antinuclear antibody  
ana|C0003243|||C0003243|CHV;CSP;MSH;NCI;NDFRT;SNOMEDCT|1|0.0952|  
ANA|ANF|||C0003243|SNOMEDCT|||  
ANA|American Nurses Association;American Nurses' Association;American Nurses'  
Associations;American association nurse;American association nurses;American  
nurse association;American nurses' association;Association, American  
Nurses';Associations, American Nurses';Nurses' Association, American;Nurses'  
Associations, American|C0002463|||C0002463|CHV;MSH;MTH|1|0.0558|  
ANA|Anti nuclear factor;Anti-nuclear factor|||C0003243|SNOMEDCT|||  
ANA|Antibodies, Antinuclear;Antibody, Antinuclear;Antinuclear  
Antibodies;Antinuclear Antibody;Antinuclear antibodies;Antinuclear  
antibody;antinuclear antibodies;antinuclear  
antibody|C0003243;C0702121|1|1|C0003243;C0702121|CHV;CSP;MSH;MTH;NCI;NDFRT;SNOME  
DCT|1|0.7644|1  
ANA|Antibodies, Antinuclear [Chemical/Ingredient]|||C0003243|NDFRT|||  
ANA|Antinuclear Antibody Assay;Antinuclear Antibody  
Measurement|C0702121|||C0702121|MTH;NCI|||  
ANA|Antinuclear antibody (substance)|||C0003243|SNOMEDCT|||  
ANA|Of Each|C1882141|||C1882141|MTH;NCI|||  
ANA|aa|C1235746|||C1882141|NCI|||  
ANA|acetylneuraminic acid|||||1|  
ANA|anandamide|C0211726|||||1|0.0156|  
ANA|anesthesia|C0002903;C0002930;C0278134|||||1|  
ANA|anesthetic|C0002932|||||1|  
ANA|anti-nuclear;antinuclear|||||1|0.0525|  
ANA|antinuclear antibody (ANA) test|||C0702121|CHV|||  
ANA|aortic nerve activity|||||1|0.0057|  
ANA|articular/nonarticular|||||1|  
ANA|aspartyl naphthylamide|||||1|

ANA|nuclear antigens|C0069115|||||1|0.0107|  
ANA|tob55|C1412840;C1826973|||C1412840|HUGO|||  
ANCA|ANCA;anca;ANCA - Anti-neutrophil cytoplasmic antibody;Anti Neutrophil  
Cytoplasmic Antibodies;Anti Neutrophil Cytoplasmic Antibody;Anti-Neutrophil  
Cytoplasmic Antibodies;Anti-Neutrophil Cytoplasmic Antibody;Anti-neutrophil  
cytoplasmic antibody;Antibodies, Anti-Neutrophil Cytoplasmic;Antibody, Anti-  
Neutrophil Cytoplasmic;Cytoplasmic Antibodies, Anti-Neutrophil;Cytoplasmic  
Antibody, Anti-Neutrophil;Anti neutrophilic cytoplasm antibody;Antibodies,  
Antineutrophil Cytoplasmic;Antibody, Antineutrophil Cytoplasmic;Antineutrophil  
Cytoplasmic Antibodies;Antineutrophil Cytoplasmic Antibody;Cytoplasmic  
Antibodies, Antineutrophil;Cytoplasmic Antibody, Antineutrophil;antineutrophil  
cytoplasmic antibodies;antineutrophil cytoplasmic antibody;Neutrophil  
cytoplasmic Ab;Neutrophil cytoplasmic Antibody;Neutrophil cytoplasmic  
antibody;antineutrophil cytoplasmic antibody  
(ANCA)|C0103647|1|1|C0103647|CHV;LNC;MSH;MTH;NDFRT;SNOMEDCT|1|0.7358|1  
ANCA|Anti neutrophilic cytoplasm antibody (substance)|||C0103647|SNOMEDCT|||  
ANCA|Antibodies, Antineutrophil Cytoplasmic  
[Chemical/Ingredient]||||C0103647|NDFRT|||  
ANCA|Antineutrophil cytoplasmic autoantibodies|||||1|0.1509|  
ANCA|anti-neutrophil cytoplasm autoantibodies|||||1|0.0257|  
ANCA|antineutrophil cytoplasm autoantibodies|||||1|0.0154|  
ANCA|cytoplasmic auto-antibodies|||||1|0.0103|  
ANCA|neutrophil cytoplasmic antigens|||||1|0.0463|  
ANCA|neutrophils|C0027950;C0948762|||||1|0.0154|  
ANC|ANC;Absolute Neutrophil Count;Absolute neutrophil count;absolute count  
neutrophils;absolute neutrophil  
count|C0948762|1|1|C0948762|CHV;MTH;NCI|1|0.7669|1  
ANC|Active noise control|||||1|0.0199|  
ANC|NEUT|C0027944;C0948762|||C0948762|NCI|||  
ANC|Neutrophils|C0027950;C0948762|||C0948762|NCI|||  
ANC|acid neutralization capacity|||||1|  
ANC|acid neutralizing capacity|||||1|0.0359|  
ANC|adult neuronal ceroid|||||1|  
ANC|antenatal care|C0033052|||C0033052|CHV;SNOMEDCT|1|0.0916|  
ANC|antenatal clinic|C1274027|||||1|0.0857|  
AP|2-aminopurine;aminopurine|C0000263|||C0000263|CHV;CSP|1|0.0033|  
AP|ABSOLUTE PITCH;Absolute pitch;MUSICAL PERFECT  
PITCH|C1834650|||C1834650|MTH;OMIM|1|0.003|  
AP|ALKALINE PHOSPHATASE;Alkaline Phosphatase;Alkaline phosphatase;alkaline  
phosphatase;alkaline phosphatases;ALP - Alkaline phosphatase;alkaline  
phosphatase  
(ALP)|C0002059;C1318717|||C0002059;C0201850;C1318717;C1561546|AOD;CHV;CSP;LCH;LNC;  
C;MSH;MTH;NCI;NDFRT;SNOMEDCT;SPN|1|0.1961|1  
AP|AP|||C0002059;C0179108;C0279212;C0332142;C1834650;C1879722;C1999039|LNC;NCI;  
OMIM;PDQ;SNOMEDCT|||  
AP|AP - Alkaline phosphatase;Alkaline phosphomonoesterase;alkaline  
phosphomonoesterase;Glycerophosphatase;glycerophosphatase|C0002059|||C0002059|CSP;  
SNOMEDCT|||  
AP|AP diagnosis;aps diagnosis;Pathology diagnosis;pathology  
diagnosis|C0332142|||C0332142|CHV;MTH;SNOMEDCT|||  
AP|APPLICATOR;APPLICATORS;Applicator;applicator;applicators|C0179108;C1705092|||  
C0179108;C1879722|CHV;HL7V2.5;NCI;NDFRT;SNOMEDCT;VANDF|||  
AP|Abasic|||||1|0.0102|  
AP|Actinic prurigo|C0406217|||||1|0.0029|  
AP|Actinobacillus pleuropneumoniae|C0085489|||||1|0.0015|  
AP|Alkaline Phosphatase [Chemical/Ingredient]||||C0002059|NDFRT|||  
AP|Alkaline phosphatase (substance)|||C0002059|SNOMEDCT|||

AP|Allopregnanolone|C0376202|||||1|0.0018|  
AP|Allopurinol|C0002144|||||1|0.0027|  
AP|Annular pancreas|C0149955|||||1|0.0008|  
AP|Anterior Pagoda|||||1|0.0032|  
AP|Anterior-Posterior;anterior and posterior;anterior posterior;anterior to  
posterior;anterior-posterior;anterior/posterior;posterior  
anterior|C1999039|1|0.968|C1999039|CHV;MTH|1|0.0023|1  
AP|Antiplasmin;antiplasmin|C0003410|||||1|0.0014|1  
AP|Applicator (physical object)|||C0179108|SNOMEDCT|||  
AP|Applicator - device|C0179108||C0179108|MTH|||  
AP|Applicator Dosing Unit|C1879722||C1879722|MTH;NCI|||  
AP|CDDP/DOX|||C0279212|NCI;PDQ|||  
AP|Cisplatin/Doxorubicin;cisplatin/doxorubicin|||C0279212|NCI;PDQ|||  
AP|Orthophosphoric-monoester phosphohydrolase (alkaline  
optimum)|||C0002059|MSH;NDFRT|||  
AP|Pathology diagnosis (contextual qualifier)|||C0332142|SNOMEDCT|||  
AP|Pathology diagnosis (contextual qualifier) (qualifier  
value)|||C0332142|SNOMEDCT|||  
AP|Phosphomonoesterase;phosphomonoesterase|C0002059;C0031678|||C0002059|CHV;SNOM  
EDCT|||  
AP|Pseudomonas aeruginosa alkaline protease|||||1|0.0009|  
AP|[14C]aminopyrine|||||1|0.0047|  
AP|abdominal  
pain|C0000737|||C0000737|AOD;CCS;CHV;COSTAR;CST;DXP;ICD9CM;LNC;MEDLINEPLUS;MSH;M  
TH;NCI;NDFRT;OMIM;SNOMEDCT|||1  
AP|abdominal pressure|C0429218|||||1|  
AP|abdominoperineal|C0442411|1|0.008|||||1  
AP|absolute power|||||1|0.0011|  
AP|accelerated phase|C0457345|||||1|0.0092|1  
AP|accessory  
pathway|C0006383;C0264897|||C0006383;C0264897|CHV;SNOMEDCT|1|0.0177|1  
AP|accessory processes|||||1|0.0009|  
AP|accounts payable|C0000939|||C0000939|MSH|||  
AP|accumulation of 14C-aminopyrine|||||1|0.0008|  
AP|acellular pertussis|C0982332|||||1|0.0027|  
AP|acetaminophen|C0000970;C2917659|||||1|0.0015|  
AP|acid  
phosphatase|C0001109|||C0001109;C0201834|CHV;CSP;LCH;LNC;MSH;MTH;NCI;NDFRT;SNOME  
DCT|1|0.0312|1  
AP|acinar parenchyma|||||1|  
AP|action potential|C0001272|||C0001272|AOD;CHV;CSP;MSH|1|0.1356|1  
AP|activation peptide|||||1|0.0014|  
AP|activator protein|||||1|  
AP|active pepsin|||||1|  
AP|active pressure|||||1|  
AP|acupuncture|C0001299;C0394664|||||1|0.0029|  
AP|acute  
pancreatitis|C0001339|||C0001339|AOD;CCS;CHV;COSTAR;ICD9CM;MTHMST;NCI;SNOMEDCT|1  
|0.0637|1  
AP|acute phase|C0439557|||C0439557|CHV;SNOMEDCT|1|0.005|1  
AP|acute pneumonia|C0740766|||C0740766|CHV;NCI|1|0.0033|1  
AP|acute proliferative|||||1|  
AP|adaptor protein|C1135629|||||1|0.0047|  
AP|adductor pollicis|C0224288;C1305009|1|0.002||||1|0.0045|1  
AP|adenomatous polyp|C0206677|||||1|  
AP|adenomatous polyposis|C0032580|||C0032580|CHV;SNOMEDCT|||1  
AP|adolescent psychiatry|C0001583|||||1|

AP|adult periodontitis|C0266929|||||1|0.0219|  
AP|advance placement||1|0.002|||||  
AP|aerosolized pentamidine|||||1|0.0044|  
AP|after parturition|||||||1|  
AP|after polarization|||||||1|  
AP|alkaline phosphatase activity|C1149888|||||1|0.0039|  
AP|alkaline phosphate|||||1|0.0009|  
AP|alpha 2-antiplasmin|C0003410;C1418648|||||1|0.0021|  
AP|alternative pathway|||||1|0.0092|  
AP|alum-precipitated|||||||1|  
AP|alveolar permeability|||||1|0.0011|1|  
AP|aminopeptidase|C0002570|||C0002570|CSP;LNC;MTH;SNOMEDCT|1|0.0068|1|  
AP|aminopyrine|C0002586|||||1|0.0063|  
AP|ammonium perchlorate|C0103081|||||1|0.0018|  
AP|ampicillin|C0002680|||||1|0.0066|  
AP|amyloid P|C0002721;C2825878|||||1|0.0017|  
AP|amyloid P component;amyloid P-component|C0002721|||||1|0.0081|1|  
AP|amyloid peptide|||||||1|  
AP|amyloid plaques|C0333463;C2936349|||||1|0.0008|  
AP|anaphylactoid purpura|C0034152|||||1|0.0018|  
AP|anatomic profile|||||||1|  
AP|angina  
pectoris|C0002962|||C0002962|AOD;CCS;CHV;COSTAR;CSP;CST;DXP;ICD9CM;ICPC;LCH;MSH;  
MTH;NCI;NDFRT;OMIM;QMR;SNOMEDCT|1|0.023|1|  
AP|antepartum|C0456336|||C0456336|CHV;NCI;SNOMEDCT|||1|  
AP|anterior pituitary|C0032016|||C0032016|CHV;NDFRT;VANDF|1|0.0478|1|  
AP|anterior pituitary gland|C0032008|||||1|0.0044|  
AP|antero-posterior;anteroposterior|||||1|0.0916|1|  
AP|antidromic potential|||||||1|  
AP|antigen presentation|C0206431|||||1|0.0015|  
AP|antiparkinsonian|C0003405|||||||1|  
AP|antipsychotic|C0040615|||||1|0.0015|  
AP|antipyrine|C0003420|||C0003420|AOD;CHV;CSP;LCH;LNC;MSH;MTH;MTHSPL;NCI;NDFRT;R  
XNORM;SNOMEDCT;VANDF|1|0.0117|  
AP|antiviral protein|||||||1|  
AP|antral peristalsis|||||||1|  
AP|aortic pressure|C0456180|||C0456180|CHV;SNOMEDCT|||1|  
AP|aortic pulmonary||1|0.020|||||1|  
AP|aortopulmonary|||||||1|  
AP|apatite|C0003522|||||1|0.0017|  
AP|apex|C1522410|||||||1|  
AP|apical pulse|||||||1|  
AP|apomorphine|C0003596|||||1|0.0027|  
AP|apothecary|||||||1|  
AP|appendectomy|C0003611|||C0003611|AOD;CCS;CHV;COSTAR;ICD9CM;LCH;MSH;MTH;NCI;SN  
OMEDCT|||1|  
AP|appendiceal perforation|||||||1|  
AP|appendicitis|C0003615;C0085693|||C0003615;C0085693|AOD;CHV;COSTAR;ICD9CM;ICPC  
;LCH;MEDLINEPLUS;MSH;MTH;NCI;NDFRT;SNOMEDCT|||1|  
AP|appendix|C0003617;C1269000|||C0003617;C1269000;C1552860|AOD;CHV;CSP;FMA;HL7V2  
.5;HL7V3.0;LNC;MSH;MTH;NCI;SNOMEDCT;UWDA|||1|  
AP|aprotinin|C0003641|||||1|0.0023|  
AP|apterous|||||1|0.0044|  
AP|apurinic|||||1|0.0051|  
AP|apurinic acid|C0003651|||C0003651|MSH;NDFRT|||1|  
AP|apurinic/aprimidinic|||||1|0.0387|

AP|area  
postrema|C0228530;C1289468|||C0228530;C1289468|CSP;FMA;MSH;SNOMEDCT|1|0.0478|1  
AP|arithmetic progression|||||1  
AP|arterial|C0003842;C0221464|||1|0.0014|  
AP|arterial blood pressure|C1272641|||1|0.0108|  
AP|arterial  
pressure|C0232108;C1272641|||C0232108;C1272641|CHV;SNOMEDCT|1|0.0838|1  
AP|arteriosclerotic plaque|||||1  
AP|artificial perilymph|||||1|0.002|  
AP|artificial pneumothorax|C0032328|||C0032328|AOD;MSH;SNOMEDCT|||1  
AP|ascorbyl palmitate|C0049690|||1|0.0014|  
AP|aspiration  
pneumonia|C0032290|||C0032290|CHV;COSTAR;CST;LCH;MSH;MTH;NCI;NDFRT;OMIM;QMR;SNOM  
EDCT|||  
AP|aspiration pneumonitis|C0032290;C1761609|||1  
AP|assessment and plan|||||1  
AP|association period|||||1  
AP|asthmatic patients|||||1|0.0012|  
AP|atherosclerotic plaque|C2936350|||C2936350|CHV;CSP;MSH;NCI;NDFRT|||1  
AP|atrial pacing|||||1|0.0042|1  
AP|atrioepetin|C0027481;C0201900|||1|0.0045|  
AP|atrioventricular pathway|||||1  
AP|atrium pace|||||1  
AP|attending physician|C1320929|||1  
AP|autologous plasma|||||1|0.0009|  
AP|available P|||||1|0.003|  
AP|available phosphorus|||||1|0.0023|  
AP|average power|||||1|0.0017|  
AP|axiopulpal|||||1  
AP|cisplatin/doxorubicin protocol|||C0279212|MTH|||  
AP|proteinase|C0030946;C1622131;C1947941|||1|0.0014|  
AQ|AMERICAN SAMOA;American Samoa;Eastern  
Samoa|C0242536|||C0242536|AOD;MSH;MTH;NCI|||  
AQ|ANTARCTICA;Antarctica;antarctica;Antarctic Regions;Antarctic region;Antarctic  
regions|C0454691|||C0454691|AOD;CHV;LCH;MSH;MTH;NCI;SNOMEDCT|||  
AQ|AQ|||C0242536;C0454691;C1705414|NCI|||  
AQ|AQ Term Type|C1705414|||C1705414|MTH;NCI|||  
AQ|AS|||C0242536|NCI|||  
AQ|ASM|||C0242536|NCI|||  
AQ|ATA|||C0454691|NCI|||  
AQ|AY|||C0454691|NCI|||  
AQ|Acoustic quantification;acoustic quantification|||||1|0.1837|1  
AQ|Aggression Questionnaire|||||1|0.0476|  
AQ|Antarctica (geographic location)|||C0454691|SNOMEDCT|||  
AQ|Quotient|C2347741|||||1|0.1361|  
AQ|accomplishment quotient|||||1  
AQ|achievement quotient|||||1  
AQ|amodiaquine|C0002641|||||1|0.3605|  
AQ|anthraquinone|C0003174;C0050133;C0303858|||||1|0.1156|  
AQ|anxiety quotient|||||1  
AQ|any quantity|||||1  
AQ|aphasia quotient|||||1  
AQ|aqueous|C0599956|1|0.998|||1|0.0612|1  
AQ|areca quid|||||1|0.0952|  
ARB|\*Arbitrary;Arbitrary;arbitrary;Arbitrary (property) (qualifier  
value)|C1264693|||C1264693|CHV;HL7V2.5;MTH;NCI;SNOMEDCT|||1  
ARB|ARB;Arb|||C0521942;C1264693;C2678493|LNC;NCI;OMIM;SNOMEDCT|||

ARB|Angiotensin 2 Receptor Blocker;Angiotensin 2 Receptor Blocker  
[EPC]|C0521942|||C0521942|NDFRT|||  
ARB|Angiotensin II Receptor Antagonist;Angiotensin II Receptor  
Antagonists;Angiotensin II receptor antagonist;Angiotensin II receptor  
antagonist, NOS;Angiotensin II Receptor Blocker;Angiotensin II Receptor  
Blockers;angiotensin II receptor  
blocker|C0521942;C2757003|||C0521942|MSH;MTH;NCI;NDFRT;SNOMEDCT;USPMG|1|0.6667|  
ARB|Angiotensin II receptor antagonist (product)|||C0521942|SNOMEDCT|||  
ARB|Angiotensin II receptor antagonist (substance)|||C0521942|SNOMEDCT|||  
ARB|Angiotensin Receptor Blockers;angiotensin receptor  
blocker|C0521942;C0815017|1|1|C0521942|NCI|||1  
ARB|Arbitrary (property)|||C1264693|SNOMEDCT|||  
ARB|BESTROPHINOPATHY|C2678493|||C2678493|MTH;OMIM|||  
ARB|adrenergic receptor binder|||1  
ARB|angiotensin II type 1 receptor blocker|||1|0.2444|  
ARB|antibiotic-resistant bacteria|||1  
ARB|any reliable brand|||1  
ARB|receptor blockade|||1|0.0889|  
ARDS|ADULT RESPIRATORY DISTRESS SYNDROME;Adult Respiratory Distress  
Syndrome;Adult respiratory distress syndrome;Adult respiratory distress  
syndrome, NOS;DISTRESS RESPIRATORY SYNDROME ADULTS;RESPIRATORY DISTRESS SYNDROME  
ADULT;RESPIRATORY DISTRESS SYNDROME, ADULT;Respiratory Distress Syndrome,  
Adult;Respiratory distress syndrome, Adult;SYNDROME ADULT RESPIRATORY  
DISTRESS;SYNDROME RESPIRATORY DISTRESS ADULT;adult respiratory distress  
syndrome;ADULT RESPIRATORY DISTRESS SYNDROME, ARDS;ARDS - Adult respiratory  
distress syndrome;adult respiratory distress syndrome (ARDS);ARDS;ards;ARDS,  
Human;Human ARDS;ARDSs, Human;Acquired respiratory distress syndrome;Acute  
Respiratory Distress Syndrome;Respiratory Distress Syndrome, Acute;acute  
respiratory distress syndrome;Adult RDS;adult rds;Adult hyaline membrane  
disease;adult hyaline membrane disease;DaNang lung;danang lung;Lung, Shock;SHOCK  
LUNG;Shock Lung;Shock lung;shock lung;Non-cardiogenic pulmonary edema;Non-  
cardiogenic pulmonary oedema;non-cardiogenic pulmonary edema;Pulmonary capillary  
leak syndrome;SYNDROME ADULT RESPIRATORY;adult respiratory syndrome;Vietnam  
lung;a r d  
s;a.r.d.s.|C0035222|1|1|C0035222|AOD;CHV;COSTAR;CSP;CST;DXP;LCH;MEDLINEPLUS;MSH;  
MTH;MTHICD9;NCI;NDFRT;SNOMEDCT|1|0.9883|1  
ARDS|Adult respiratory distress syndrome (disorder)|||C0035222|SNOMEDCT|||  
ARDS|Congestive atelectasis|C0035222;C0205938|||C0035222|SNOMEDCT|||  
ARDS|Non-cardiogenic pulmonary edema (disorder)|||C0035222|SNOMEDCT|||  
ARDS|Resp. distress synd. - adult|C0001675;C1706450|||C0035222|SNOMEDCT|||  
ARDS|Respirat distress synd-adult|||C0035222|SNOMEDCT|||  
ARDS|Respiratory Distress Syndrome, Adult [Disease/Finding]|||C0035222|NDFRT|||  
ARDS|WET LUNG SYNDROME;wet lung syndrome|C0035222;C0158940|||C0035222|CHV;DXP|||  
ARDS|acute respiratory failure|C0264490|||1|0.0073|  
ARDS|lung failure|||1|0.0044|  
ARDS|wet lung|C0034063;C0035222|||C0035222|CHV;CSP|||  
ASA|2-(Acetyloxy)benzoic Acid;Benzoic acid, 2-(acetyloxy)-  
|||C0004057|MSH;NCI;NDFRT;PDQ|||  
ASA|ASA;ASPIRIN;Aspirin;aspirin;aspirins;Acetylsalicylic Acid;Acetylsalicylic  
acid;Acid, Acetylsalicylic;acetylsalicylic acid;Antiplatelet aspirin;Aspirin  
[antiplatelet];antiplatelet aspirin;aspirin antiplatelet;Aspirin  
(product);Aspirin product;aspirin products;Aspirin - chemical;aspirin  
chemicals;acetylsalicylic  
acid|C0004057|1|0.808|C0004057|AOD;CHV;CSP;LCH;MSH;MTH;MTHSPL;NCI;NDFRT;PDQ;RXNO  
RM;SNOMEDCT;USPMG;VANDF|1|0.637|1  
ASA|Acetylsalicylic acid - chemical|||C0004057|SNOMEDCT|||  
ASA|Adams-Stokes attack|||1

ASA|Adaptive Speech Alignment|||||1  
ASA|American Society of Anaesthesiologists;American Society of  
Anesthesiologists|C2346733|1|0.186|||1|0.153|1  
ASA|American Society of Anesthesiology|||||1|0.0297|  
ASA|Antiplatelet aspirin (product)|||C0004057|SNOMEDCT|||  
ASA|Antiplatelet aspirin (substance)|||C0004057|SNOMEDCT|||  
ASA|Aspirin (substance)|||C0004057|SNOMEDCT|||  
ASA|Aspirin - chemical (substance)|||C0004057|SNOMEDCT|||  
ASA|Aspirin [Chemical/Ingredient]||||C0004057|NDFRT|||  
ASA|Aspirin [central nervous system use]||||C0004057|SNOMEDCT|||  
ASA|Aspirin [central nervous system use] (product)|||C0004057|SNOMEDCT|||  
ASA|Aspirin [central nervous system use] (substance)|||C0004057|SNOMEDCT|||  
ASA|Aspirin [musculoskeletal use]||||C0004057|SNOMEDCT|||  
ASA|Aspirin [musculoskeletal use] (product)|||C0004057|SNOMEDCT|||  
ASA|Aspirin [musculoskeletal use] (substance)|||C0004057|SNOMEDCT|||  
ASA|Aspirin product (substance)|||C0004057|SNOMEDCT|||  
ASA|Atrial septal aneurysm;atrial septal aneurysm|C0521533|||||1|0.0332|1  
ASA|accessible surface area|||||1|0.0148|  
ASA|acetylsalicylate|C0304348|||||1|0.0071|  
ASA|active systemic anaphylaxis|||||1|0.013|1  
ASA|activity|C0026606;C0205177;C0439167;C0441655;C1561536|||||1|0.0059|  
ASA|acute severe asthma|C0038218|||||1|0.0047|1  
ASA|allele-specific amplification|||||1|0.0148|  
ASA|aminosalicylic acid|C0030125|1|0.006|||||  
ASA|anterior spinal artery|C0149603;C1278946|||||1|0.0095|1  
ASA|anti-sperm antibodies|C0432662|||||1|0.0119|  
ASA|antibody to surface antigen ratio|||||1|  
ASA|anticoagulation regimen of aspirin|||||1|  
ASA|antisperm antibodies|||||1|0.0451|  
ASA|argininosuccinate|C0368700|||||1|  
ASA|argininosuccinic acid|C0003777|||C0003777|CHV;MSH;NDFRT;SNOMEDCT|||1  
ASA|arsenate|C0104238|||||1|  
ASA|ascorbate|C0178487|||||1|0.0148|  
ASA|aspirin-sensitive asthma|||||1|0.0053|1  
ASA|asthma, nasal polyps, aspirin intolerance|||||1|  
ASCUS|ASCUS;Asci;Ascus;asci;ascus|C0521060;C1510965|||C0521060;C0521184|CHV;GO;N  
CI;PDQ;SNOMEDCT|||  
ASCUS|Ascus (fungus);ascus fungus|C0521060|||C0521060|CHV;MTH;SNOMEDCT|||  
ASCUS|Ascus (fungus) (organism)|||C0521060|SNOMEDCT|||  
ASCUS|Atypical Squamous Cell of Uncertain Significance;Atypical squamous cells  
of uncertain significance;atypical squamous cells of uncertain  
significance;Atypical Squamous Cell of Undetermined Significance;Atypical  
squamous cells of undetermined significance;atypical squamous cells of  
undetermined significance|C0521184|1|1|C0521184|CHV;MTH;NCI;PDQ;SNOMEDCT|1|1|1  
ASCUS|Atypical squamous cells of undetermined significance (morphologic  
abnormality)|||C0521184|SNOMEDCT|||  
ASCUS|ascis|||C0521060|CHV|||  
ASCUS|ascu|||C0521060;C0521184|CHV|||  
ASCVD|ASCVD;Ascvd;ascvd;Arteriosclerotic Cardiovascular Disease;Arteriosclerotic  
cardiovascular disease;Arteriosclerotic cardiovascular disease,  
NOS;arteriosclerotic cardiovascular disease;Atherosclerotic Cardiovascular  
Disease;Atherosclerotic cardiovascular disease;atherosclerotic cardiovascular  
disease;Cardiovascular arteriosclerosis;arteriosclerosis  
cardiovascular;Cardiovascular degeneration with arteriosclerosis;Cardiovascular  
disease with arteriosclerosis;Cardiovascular sclerosis with  
arteriosclerosis|C0003972|1|1|C0003972;C0007222|CHV;ICD9CM;MTH;MTHICD9;NCI;SNOME  
DCT|1|1|1

ASCVD|Arteriosclerotic cardiovascular disease (disorder)|||C0003972|SNOMEDCT|||  
ASCVD|CARDIOVASC DIS|||C0007222|MSH|||  
ASCVD|CARDIOVASCULAR DISORDER;CARDIOVASCULAR DISORDER (NOS);CARDIOVASCULAR  
DISORDERS;Cardiovascular Disorder;Cardiovascular Disorders;Cardiovascular  
disorder;Cardiovascular disorder, NOS;DISORDER CARDIOVASCULAR  
(NOS);cardiovascular disorder;cardiovascular disorders;CVD;CVD, NOS;CVS  
disease;Cardiovascular disease, unspecified;Cardiovascular system  
disease;Cardiovascular system diseases;Disease of cardiovascular system;Disease  
of cardiovascular system, NOS;cardiovascular system disease;cardiovascular  
system diseases;Disorder of cardiovascular  
system|C0007222|||C0007222|AOD;CHV;CSP;CST;ICD9CM;NCI;SNOMEDCT|||  
ASCVD|CVS - Cardiovascular system diseases|||C0007222|SNOMEDCT|||  
ASCVD|CVS disorders NOS|||C0007222|SNOMEDCT|||  
ASCVD|Cardiovascular Disease;Cardiovascular Diseases;Cardiovascular  
disease;Cardiovascular disease, NOS;Disease, Cardiovascular;Diseases,  
Cardiovascular;cardiovascular disease;cardiovascular diseases;Cardiovascular  
Disease  
(CVD)|C0007222;C1555754|||C0007222|CHV;LNC;MEDLINEPLUS;MSH;MTH;MTHICD9;NCI;NDFRT  
;SNOMEDCT|||  
ASCVD|Cardiovascular Diseases [Disease/Finding]|||C0007222|NDFRT|||  
ASCVD|Cardiovascular arteriosclerosis unspecified|||C0003972|SNOMEDCT|||  
ASCVD|Cardiovascular arteriosclerosis unspecified  
(disorder)|||C0003972|SNOMEDCT|||  
ASCVD|Disease of cardiovascular system (disorder)|||C0007222|SNOMEDCT|||  
ASCVD|Disorder of cardiovascular system (disorder)|||C0007222|SNOMEDCT|||  
ASCVD|[X]Cardiovascular disease, unspecified|||C0007222|SNOMEDCT|||  
ASCVD|[X]Cardiovascular disease, unspecified (disorder)|||C0007222|SNOMEDCT|||  
ASD|ASD;asd|C0018817;C1510586|||C0018817;C1510586|CHV;DXP;OMIM;RAM|||  
ASD|ASD - Atrial septal defect;Atrial septal defect (ASD);atrial septal defect  
(ASD);ATRIAL SEPTAL DEFECT;Atrial Septal Defect;Atrial Septal Defects;Atrial  
septal defect;Atrial septal defect NOS;Atrial septal defects;Defect, Atrial  
Septal;Defects, Atrial Septal;Septal Defect, Atrial;Septal Defects,  
Atrial;atrial septal defect;atrial septal defects;Congenital atrial septal  
defect;DEFECT ARTRIAL SEPTUM;HEART SEPTAL DEFECT ATRIAL;Heart Septal Defects,  
Atrial;atrial septal heart defect;atrial septal heart defects;IA SEPTAL  
DEFECT;Interatrial septal defect;SEPTAL DEFECT INTERATRIAL;interatrial septal  
defect;Interauricular septal defect;atrioseptal  
defect|C0018817|1|0.956|C0018817|CCS;CHV;COSTAR;CSP;CST;DXP;MSH;MTH;NCI;NDFRT;OM  
IM;QMR;SNOMEDCT|1|0.6981|1  
ASD|AUTISM SPECTRUM DISORDER;Autism Spectrum Disorder;Autism Spectrum  
Disorders;Disorder, Autism Spectrum;Disorders, Autism Spectrum;Spectrum  
Disorder, Autism;Spectrum Disorders, Autism;autism spectrum  
disorder|C1510586|1|0.034|C1510586|MSH;MTH;NCI;OMIM|1|0.1028|1  
ASD|Acute Stress Disorder;acute stress disorder|C0236816|||1|0.066|1  
ASD|Alzheimer senile dementia|||||1  
ASD|Atria septal defect (ASD)|||C0018817|OMIM|||  
ASD|Atrial septal defect (disorder);Atrial septal defect NOS  
(disorder)|||C0018817|SNOMEDCT|||  
ASD|Auricular septal defect NOS|||C0018817|SNOMEDCT|||  
ASD|Auricular septal defect NOS (disorder)|||C0018817|SNOMEDCT|||  
ASD|Congenital atrial septal defect (disorder)|||C0018817|SNOMEDCT|||  
ASD|Heart Septal Defects, Atrial [Disease/Finding]|||C0018817|NDFRT|||  
ASD|Interauricular septal defect (disorder)|||C0018817|SNOMEDCT|||  
ASD|adaptive seating device|||||1  
ASD|adult Still's disease|C0085253|||1|0.0227|  
ASD|adult/adolescent spectrum of disease|||||1  
ASD|air-space disease|||||1

ASD|aldosterone secretion defect|||||||1  
ASD|androstenedione|C0002860;C0337432|||||1|0.0152|  
ASD|anterior sagittal diameter|||||||1  
ASD|anti-siphon device|||||1|0.0065|  
ASD|antisiphon device|||||1|0.0065|1  
ASD|argininosuccinic acid synthetase deficiency|C0175683|||||||1  
ASD|arthritis syphilitica deformans|||||||1  
ASD|arthroscopic subacromial decompression|||C0408088|SNOMEDCT|1|0.0195|  
ASD|aspartate semialdehyde dehydrogenase|C0004012|||||1|0.0054|  
ASD|autistic spectrum disorder|C0524528|||||1|0.0574|  
AST|ASAT - Aspartate aminotransferase;Aminotransferase,  
Aspartate;Aminotransferases, Aspartate;Aspartate Aminotransferase;Aspartate  
Aminotransferases;Aspartate aminotransferase;aspartate  
aminotransferase;aspartate-aminotransferase;Aminotransferase, L-Aspartate-2-  
Oxoglutarate;L Aspartate 2 Oxoglutarate Aminotransferase;L-Aspartate-2-  
Oxoglutarate Aminotransferase;L-aspartate:2-oxoglutarate  
aminotransferase;Apoaminotransferase, Aspartate;Aspartate  
Apoaminotransferase;Glutamate Aspartate Transaminase;Glutamate-Aspartate  
Transaminase;Transaminase, Glutamate-Aspartate;Glutamate oxaloacetate  
transaminase;glutamate oxaloacetate transaminase;Glutamic Oxaloacetic  
Transaminase;Glutamic-Oxaloacetic Transaminase;Glutamic-oxaloacetic  
transaminase;Transaminase, Glutamic-Oxaloacetic;glutamic oxaloacetic  
transaminase;Glutamic-aspartic transaminase;glutamic aspartic transaminase;S-  
ASAT;s-  
asat|C0004002|1|1|C0004002;C0201899|AOD;CHV;CSP;LNC;MSH;MTH;NCI;NDFRT;SNOMEDCT|1  
|0.109|1  
AST|AST|||C0004002;C0201899;C0242192;C1420113|AOD;CHV;HUGO;NCI|||  
AST|AST - Aspartate transaminase;aspartate transaminase (AST);Aspartate  
Transaminase;Aspartate transaminase;Transaminase, Aspartate;aspartate  
transaminase|C0004002;C0242192|||C0004002;C0242192|CHV;CSP;MSH;MTH;NCI;NDFRT;SNO  
MEDCT|||  
AST|AST measurement;Aspartate Aminotransferase Measurement;Aspartate  
aminotransferase measurement;Aspartate aminotransferase assay;GOT  
measurement;Glutamic oxaloacetic transaminase measurement;SGOT;sgot;SGOT  
measurement;serum AST;serum  
SGOT|C0201899|||C0201899;C0242192|CHV;MSH;MTH;NCI;SNOMEDCT|||  
AST|Antimicrobial susceptibility testing|||||1|0.0962|  
AST|Aphasia Screening Test|C0450996|||||||1  
AST|Aryl sulfotransferase|C0003942;C1152487|||||1|0.0705|  
AST|Aspartate Aminotransferases [Chemical/Ingredient]|||C0004002|NDFRT|||  
AST|Aspartate aminotransferase (substance)|||C0004002|SNOMEDCT|||  
AST|Aspartate aminotransferase measurement (procedure)|||C0201899|SNOMEDCT|||  
AST|GLUTAMIC OXALOACETIC TRANS 000|||C0004002|MSH|||  
AST|GOT;got|||C0004002|AOD;CHV;SNOMEDCT|||  
AST|Glutamic-Oxaloacetic Transaminase, Serum;Serum Glutamic Oxaloacetic  
Transaminase;Serum Glutamic-Oxaloacetic Transaminase;Transaminase, Serum  
Glutamic-Oxaloacetic;serum glutamic-oxaloacetic transaminase;SGOT - Glutamate  
oxaloacetate transaminase|C0242192|||C0242192|MSH;MTH;NCI;SNOMEDCT|||  
AST|ISSD|C1096902;C1420113|||C1420113|HUGO|||  
AST|L-Aspartate:2-oxoglutarate aminotransaminase|||C0004002|MSH;NDFRT|||  
AST|NSD|C1420113;C2930923|||C1420113|HUGO|||  
AST|SD|||C1420113|HUGO|||  
AST|SGOT (AST)|||C0242192|NCI|||  
AST|SIALIN;SLC17A5;SLC17A5 gene;SLD|C1420113|||C1420113|HUGO;MTH;OMIM|||  
AST|SOLUTE CARRIER FAMILY 17 (SODIUM PHOSPHATE COTRANSPORTER), MEMBER  
5|||C1420113|OMIM|||  
AST|Transaminase A;transaminase A|||C0004002|CSP;SNOMEDCT|||

AST|above selected threshold|||||||1  
AST|acid suppression therapy|||||||1  
AST|acoustic stimulation test|C0521310|||||||1  
AST|acute suppurative thyroiditis|C0040150|||||1|0.0705|  
AST|alcohol sniff test|||||||1  
AST|androgen suppression therapy|||||1|0.0256|1  
AST|angiotensin sensitivity test|||||||1  
AST|anterior spinothalamic  
tract|C0228591;C1289706|||C0228591;C1289706|FMA;SNOMEDCT|||1  
AST|antistreptolysin titer|C1318462|||||||1  
AST|antistreptozyme|||||||1  
AST|arginine stimulation test|C0430097|||||1|0.0385|  
AST|aspartate|C0085845|||||1|0.2051|  
AST|aspartate aminotransferase (AST) assay test|||C0201899|CHV|||  
AST|aspartate transferase|||||1|0.0962|  
AST|astigmatism|C0004106|||C0004106|AOD;CHV;COSTAR;CSP;CST;DXP;ICD9CM;LCH;MEDLIN  
EPLUS;MSH;NDFRT;OMIM;SNOMEDCT|||1  
AST|atrial overdrive stimulation rate|||||||1  
AST|audiometry sweep test|||||||1  
AST|serum aspartate transaminase|||||1|0.2885|  
AST|serum glutamate oxaloacetate transaminase (SGOT)|||C0242192|CHV|||  
AST|solute carrier family 17 (anion/sugar transporter), member  
5|||C1420113|HUGO|||  
ATG|AC|C1879503|||C0003354|NCI|||  
ATG|AG|||C0003354|NCI|||  
ATG|ANTI-THYMOCYTE GLOBULIN;Anti Thymocyte Globulin;Anti-Thymocyte  
Globulin;Anti-Thymocyte Globulins;Antithymocyte Globulin;Antithymocyte  
Globulins;Antithymocyte globulin;GLOBULIN,ANTI-THYMOCYTE;Globulin, Anti-  
Thymocyte;Globulin, Antithymocyte;Globulins, Anti-Thymocyte;Globulins,  
Antithymocyte;anti thymocyte globulin;anti-thymocyte globulin;antithymocyte  
globulin;antithymocyte globulins;Antithymocyte Serum;Antithymocyte gamma  
globulin;Antithymocyte immunoglobulin;antithymocyte  
immunoglobulin;Antithymoglobulin;Antithymoglobulins;antithymoglobulin;Lymphocyte  
Immune Globulin, Anti Thymocyte Globulin;Lymphocyte Immune Globulin, Anti-  
Thymocyte  
Globulin|C0003442|1|1|C0003442|CHV;MSH;MTH;NCI;NDFRT;PDQ;RXNORM;SNOMEDCT;VANDF|1  
|0.949|1  
ATG|ANTIGUA AND BARBUDA;Antigua and Barbuda;Barbuda and  
Antigua|||C0003354|AOD;MSH;MTH;NCI;SNOMEDCT|||  
ATG|ATG;atg|||C0003354;C0003442|CHV;NCI;PDQ;SNOMEDCT|||  
ATG|ATS|||C0003442|NCI|||  
ATG|Antigua and Barbuda (geographic location)|||C0003354|SNOMEDCT|||  
ATG|Aurothioglucose;aurothioglucose|C0018033|||C0018033|CHV;CSP;MSH;NCI;NDFRT;RX  
NORM;SNOMEDCT;VANDF|1|0.0216|  
ATG|adenine-thymine-guanine|||||||1  
ATG|angiotensinogen|C0003017|||C0003017;C0523500;C1366631|AOD;CHV;CSP;LNC;MSH;MT  
H;NCI;NDFRT;OMIM;SNOMEDCT|1|0.0294|  
ATG|antihuman thymocyte globulin|||||||1  
ATG|antithyroglobulin|C0443883|||||||1  
ATN|ALBINISM I;ALBINISM, OCULOCUTANEOUS, TYPE IA;ATN;Albinism 1;OCA1;OCA1 -  
Tyrosinase-negative oculocutaneous albinism;OCA1A;OCULOCUTANEOUS ALBINISM, TYPE  
I;OCULOCUTANEOUS ALBINISM, TYROSINASE-NEGATIVE;Oculocutaneous albinism,  
tyrosinase negative;Tyrosinase-negative oculocutaneous albinism;tyrosinase-  
negative oculocutaneous albinism;Oculocutaneous albinism type 1;Oculocutaneous  
albinism type 1A|C0268494|||C0268494|MSH;OMIM;SNOMEDCT|||1  
ATN|Tyrosinase-negative oculocutaneous albinism  
(disorder)|||C0268494|SNOMEDCT|||

ATN|Tyrosinase-related oculocutaneous albinism|||C0268494|SNOMEDCT|||  
ATN|acute tubular  
necrosis|C0022672|1|1.000|C0022672|CHV;COSTAR;CSP;DXP;MTHICD9;SNOMEDCT|1|0.9693|  
1  
ATN|anterior thalamic nuclei|C0228316|||1|0.0307|  
ATN|augmented transition network|||1  
ATN|autonomous thyroid nodule|||1  
AVF|Arteriovenous fistula;Arteriovenous fistulae;arteriovenous  
fistula|C0003855|1|0.024||1|0.9445|1  
AVF|Lead AVF;lead aVF;aVF;avf|C0449215||C0449215|CHV;LNC;SNOMEDCT|||  
AVF|aVF (body structure)|||C0449215|SNOMEDCT|||  
AVF|abdominal visceral fat|C1563740|||1|0.0556|  
AVF|antiviral factor|||1  
AVF|augmented vector foot|C2983584|1|0.976|||  
AVF|augmented voltage left leg|||1  
AVM|AV - Congenital arteriovenous malformation;Arteriovenous Malformation,  
Unspecified;CONGENITAL ARTERIOVENOUS MALFORMATION;Congenital arteriovenous  
malformation;a v malformation;a v malformations;a-v malformation;anomalies  
arteriovenous;arteriovenous anomaly;av malformation;av  
malformations|C0003857||C0003857|CHV;COSTAR;MTH;SNOMEDCT|||  
AVM|AVM|C0003857;C0279476||C0003857;C0279476|MEDLINEPLUS;NCI;PDQ|||  
AVM|AVM - Congenital arteriovenous malformation|||C0003857|SNOMEDCT|||  
AVM|Arteriovenous Malformation;Arteriovenous Malformations;Arteriovenous  
malformation;Arteriovenous malformation, NOS;Malformation,  
Arteriovenous;Malformations, Arteriovenous;arteriovenous  
malformation;arteriovenous  
malformations|C0003857;C0334533|1|0.974|C0003857;C0334533|CHV;CSP;MEDLINEPLUS;MS  
H;MTH;NCI;NDFRT;OMIM;SNOMEDCT|1|0.9807|1  
AVM|Arteriovenous Malformations [Disease/Finding]|||C0003857|NDFRT|||  
AVM|Arteriovenous malformation (morphologic abnormality)|||C0003857|SNOMEDCT|||  
AVM|Avermectin Bla|C0052701|||1|0.0097|  
AVM|Congenital arteriovenous malformation (disorder)|||C0003857|SNOMEDCT|||  
AVM|DOX/MTX/VBL|||C0279476|NCI;PDQ|||  
AVM|Doxorubicin/Methotrexate/Vinblastine;doxorubicin/methotrexate/vinblastine|C0  
279476|||C0279476|MTH;NCI;PDQ|||  
AVM|atrioventricular malformation|||1  
AVM|avian vacuolar myelinopathy|||1|0.0097|  
AVM|aviation medicine|C0004431|||C0004431|CHV;MSH|||1  
AV|AO|||C0280598|NCI;PDQ|||  
AV|AV|||C0280598;C0752050;C1706433|FMA;NCI;PDQ|||  
AV|Adriamycin and vincristine|||1|0.0015|  
AV|Anterior ventral nucleus of thalamus;Anteroprincipal thalamic  
nucleus;Anteroventral Nucleus;Anteroventral nucleus;Nucleus,  
Anteroventral;anteroventral nucleus;Anteroventral Thalamic Nucleus;Anteroventral  
thalamic nucleus;Nucleus, Anteroventral Thalamic;Thalamic Nucleus,  
Anteroventral;Nucleus anterior thalami ventralis;Nucleus anterior  
ventralis;Nucleus anteroventralis of thalamus;Nucleus anteroventralis  
thalami;Nucleus thalamicus anteroprincipalis;Structure of anteroventral nucleus  
of thalamus|C0752050||C0752050|FMA;MSH;MTH;SNOMEDCT|1|0.0015|  
AV|Anteroventral nucleus of thalamus;Nucleus  
anteroventralis|C0752050;C1761582||C0752050|FMA;SNOMEDCT|||  
AV|Anteroventral nucleus of thalamus (body structure)|||C0752050|SNOMEDCT|||  
AV|Artificial vagina|||1|0.0027|  
AV|Atrioventricular;atrio-ventricular;atrioventricular||1|0.748||1|0.7883|1  
AV|Audiovisual;audiovisual|||1|0.0042|1  
AV|CAP;Cap;cap|C0179586;C1657858;C1706092;C2985259||C1706433|NCI|||

AV|CAPSULE;Capsule;capsule;{Capsule}|C0006935;C1325531;C1704652;C1706433;C282504  
1|||C1706433|NCI;SNOMEDCT|||  
AV|Capsule - unit of product usage;Capsule Dosing  
Unit|C1706433|||C1706433|MTH;NCI;SNOMEDCT|||  
AV|Capsule - unit of product usage (qualifier value)|||C1706433|SNOMEDCT|||  
AV|DOX/VCR|||C0280598|NCI;PDQ|||  
AV|DOX/VCR chemotherapy protocol|||C0280598|CHV|||  
AV|Doxorubicin/Vincristine;doxorubicin/vincristine|||C0280598|NCI;PDQ|||  
AV|Nucleus anterior principalis (Hassler)|||C0752050|FMA|||  
AV|Nucleus anteroinferior|||C0752050|FMA|||  
AV|Nucleus anteroventralis (body structure)|||C0752050|SNOMEDCT|||  
AV|Structure of anteroventral nucleus of thalamus (body  
structure)|||C0752050|SNOMEDCT|||  
AV|abomasal volvulus|||||1|0.0036|  
AV|abvolt|||||1|  
AV|adenoassociated virus|C0001417;C1564874|||||1|  
AV|adriamycin plus vincristine|||||1|0.0015|  
AV|allergic vasculitis|C0151436|||||1|  
AV|alveolar duct|C0391892|||C0391892|CHV;FMA;NCI;UWDA|||1|  
AV|annexin V|C0059249;C1332095|||||1|0.0018|  
AV|anterior ventral|||||1|0.0042|  
AV|anteroventral|||||1|  
AV|anteversion|C0333053|||||1|  
AV|anteverted|||||1|  
AV|anticipatory vomiting|C0042964|||||1|  
AV|aortic  
valve|C0003501;C1269005|1|0.016|C0003501;C1269005|AOD;CHV;CSP;FMA;HL7V2.5;LCH;LN  
C;MSH;NCI;SNOMEDCT;UWDA|1|0.0097|1|  
AV|arteriovenous|C0302193;C0450109|1|0.232|||1|0.1574|1|  
AV|artificial ventilation|C0035205|||||1|0.0024|1|  
AV|assisted ventilation|C0554804|||C0554804|CHV|1|0.0021|1|  
AV|auditory-visual|||||1|0.0042|1|  
AV|augmented vector|||||1|  
AV|autophagic vacuoles|C0544966|||||1|0.0054|  
AV|aviation medicine|C0004431|||||1|  
AV|avoirdupois|||||1|  
AV|doxorubicin and vincristine chemotherapy protocol|||C0280598|CHV|||  
AV|doxorubicin/vincristine protocol|||C0280598|MTH|||  
AV|femoral anteversion|||||1|0.0021|  
AV|human adenovirus|C0001490|||||1|0.0027|  
AV|velocity|C0439830;C1547053|||||1|0.0045|  
AVR|Lead AVR;lead avr;aVR|C0449217|||C0449217|CHV;LNC;SNOMEDCT|||  
AVR|aVR (body structure)|||C0449217|SNOMEDCT|||  
AVR|accelerated ventricular rhythm|||||1|  
AVR|acute vascular rejection|||||1|0.0634|  
AVR|antiviral regulator|||||1|  
AVR|aortic valve regurgitation|C0003504|1|0.010|||  
AVR|aortic valve  
replacement|C0003506|1|0.762|C0003506|CHV;COSTAR;NCI;SNOMEDCT|1|0.8687|1|  
AVR|aortic valve resistance||1|0.008|||  
AVR|arteriole-to-venule ratio|||||1|0.0133|  
AVR|ascending vasa recta|C2952018|||C2952018|FMA|1|0.0398|  
AVR|augmented voltage right arm||1|0.206|||1|  
AVR|pathogen avirulence|||||1|0.0147|  
BAI|Baying;bay;baying;bays|C0234880;C3203003|||C0234880|CHV;SNOMEDCT|||  
BAI|Baying (function)|||C0234880|SNOMEDCT|||  
BAI|Baying (observable entity)|||C0234880|SNOMEDCT|||

BAI|Baying, function (observable entity)||||C0234880|SNOMEDCT|||  
BAI|Brain Atrophy Index;brain atrophy index|||||1|0.1395|1  
BAI|bai;baies|C0234880|||C0234880|CHV|||  
BAI|basilar artery insufficiency|C0004812||||||1  
BAI|basion-axial interval||||||1  
BAI|beck anxiety inventory|C0582613|1|1.000|||||  
BAI|blunt abdominal injury||||||1  
BAI|blunt aortic injury|||||1|0.2791|1  
BAI|breath-actuated inhaler||||||1  
BAI|bronchial arterial infusion|||||1|0.3488|1  
BAI|bronchial artery infusion|||||1|0.2326|  
BAL|1,2-Dithioglycerol|||C0012383|NCI|||  
BAL|1-Propanol, 2,3-dimercapto-;2,3-Dimercapto-1-propanol;2,3-dimercapto-1-  
propanol|||C0012383|MSH;NCI;NDFRT|1|0.004|  
BAL|2,3 Dimercaptopropanol;2,3-Dimercaptopropanol;2,3-  
dimercaptopropanol|||C0012383|MSH;NDFRT|1|0.0107|  
BAL|2,3 Dithiopropan 1 ol;2,3-Dithiopropan-1-ol|||C0012383|MSH;NDFRT|||  
BAL|Anti-Lewisite Agent, British;British Anti Lewisite Agent;British Anti-  
Lewisite Agent;Anti-Lewisite, British;British Anti Lewisite;British Anti-  
Lewisite;British anti-Lewisite;British anti-lewisite;british anti  
lewisite;british anti-lewisite;BAL - British Anti-Lewisite;British anti-Lewisite  
(BAL);BAL-  
Dimercaprol;DIMERCAPROL;Dimercaprol;dimeraprol;Dimercaptopropanol;dimercaptopro  
panol;Dithioglycerol|C0012383|||C0012383|CHV;MSH;MTH;MTHSPL;NCI;NDFRT;RXNORM;SNO  
MEDCT;VANDF|1|0.0066|1  
BAL|B-AGGRESSIVE LYMPHOMA 1;BAL1;PARP9;PARP9 gene;POLY(ADP-RIBOSE) POLYMERASE  
9;poly (ADP-ribose) polymerase family, member  
9|C1538586|||C1538586|HUGO;MTH;OMIM|||  
BAL|BAC|||C0684262|AOD|||  
BAL|BAL;bal|||C0012383;C0684262;C1538586|AOD;CHV;HUGO;LNC;OMIM;SNOMEDCT|||  
BAL|Blood alcohol concentration;blood alcohol concentration;blood alcohol  
concentration (BAC)|C0684262|||C0684262|AOD;CHV;MTH|||  
BAL|Dimercaprol (product)|||C0012383|SNOMEDCT|||  
BAL|Dimercaprol (substance)|||C0012383|SNOMEDCT|||  
BAL|Dimercaprol [Chemical/Ingredient]|||C0012383|NDFRT|||  
BAL|balance;balanced|C0014653;C0205415;C0560184|||C0205415|CHV;SNOMEDCT|||1  
BAL|balsam|C0004714||||||1  
BAL|bioartificial liver|C0336562|||C0336562|CHV;CSP;MSH|1|0.021|1  
BAL|biphenotypic acute leukemia|C0023464|||C0023464|MSH;NDFRT|1|0.0017|  
BAL|blood alcohol  
level|C0428249;C0542492;C0684262|1|0.086|C0428249;C0542492;C0684262|AOD;CHV;CSP;  
SNOMEDCT|1|0.0158|1  
BAL|bronchoalveolar|||||1|0.0078|  
BAL|bronchoalveolar  
lavage|C0189381;C0396473;C1535502|1|0.914|C0189381;C1535502|CHV;CSP;MSH;MTH;NCI;  
PDQ;SNOMEDCT|1|0.9023|1  
BAL|bronchoalveolar lavage  
fluid|C0006279|||C0006279|MSH;MTH;NCI;SNOMEDCT|1|0.0302|  
BIPAP|bilevel positive airway pressure||1|1.000|||||1  
BIPAP|positive airway pressure|||||1|0.9541|  
BIPAP|positive airway pressure ventilation|||||1|0.0459|  
BKA|Bka;CGI-35;FCF1;FCF1 gene|C1426785|||C1426785|HUGO;MTH|||  
BKA|FCF1 small subunit (SSU) processome component homolog (S.  
cerevisiae)|||C1426785|HUGO|||  
BKA|below-knee amputation|C0002692|1|1.000|C0002692|NCI|1|0.5714|1  
BKA|bongkreic acid|C0005982|||C0005982|MSH;NDFRT|1|0.4286|

BK|Arg Pro Pro Gly Phe Ser Pro Phe Arg;Arg-Pro-Pro-Gly-Phe-Ser-Pro-Phe-Arg|||C0006100|MSH;NDFRT|||  
BK|BA|||C0006036|NCI|||  
BK|BIH;BOSNIA-HERZEGOVINA;Bosnia and Hercegovina;Bosnia and Herzegovina;Bosnia-Hercegovina;Bosnia-Herzegovina;Bosnia;bosnia;Bosnia - Herzegovnia;Herzegovina|C0006036||C0006036|AOD;CHV;CSP;MSH;MTH;NCI;SNOMEDCT|||  
BK|BK;Kallidin I;kallidin I;kallidin  
9|C0006100||C0006036;C0006100|CSP;NCI;OMIM;SNOMEDCT|||  
BK|BK (virus)|C0005670|1|0.686|||  
BK|BRADYKININ;Bradykinin;bradykinin;bradykinins|C0006100;C0006101;C1537501|||C0006100;C0006101;C1537501|AOD;CHV;CSP;HUGO;LCH;LNC;MSH;MTH;NCI;NDFRT;OMIM;SNOMEDCT|1|0.9115|1  
BK|Bosnia - Herzegovnia (geographic location)|||C0006036|SNOMEDCT|||  
BK|Bradykinin [Chemical/Ingredient]|||C0006100|NDFRT|||  
BK|Ca(2+)-activated K(+)|||1|0.0189|  
BK|K+ channel|||1|0.0072|  
BK|Kallidin I (substance)|||C0006100|SNOMEDCT|||  
BK|back|C0004600;C0205095;C0460009;C1281593;C1995000|||1|  
BK|below knee;below the knee;below-knee||1|0.314||1|0.0267|1  
BK|berkelium|C0005124|||1|  
BK|bovine kidney|||1|  
BK|bullous keratopathy|C0155111|||1|  
BK|calcium-activated potassium channels|||1|0.0028|  
BK|large conductance|||1|0.0117|  
BK|large-conductance Ca2+-activated K+|||1|0.0122|  
BK|large-conductance calcium-activated potassium|||1|0.005|  
BK|potassium channel|C0032824|||1|0.0039|  
BMI|BMI|||C0005893;C1305855;C1542867|AOD;CHV;CSP;LNC;NCI;OMIM|||  
BMI|BMI - Body mass index;body mass index (BMI);BODY MASS INDEX;Body Mass Index;Body Mass Indices;Body mass index;Body mass index, NOS;Index, Body Mass;body mass index;Index, Quetelet;Quetelet Index;Quetelet index;Quetelet's Index;Quetelets Index;quetelet index|C0005893;C1305855|1|0.994|C0005893;C1305855;C2240399|AOD;CHV;CSP;ICD9CM;LNC;MSH;MTH;NCI;OMIM;SNOMEDCT|1|0.9842|1  
BMI|Body mass index (BMI) [Ratio]|||C1542867|LNC|||  
BMI|Body mass index (observable entity)|||C1305855|SNOMEDCT|||  
BMI|Body mass index - observation|||C1305855|SNOMEDCT|||  
BMI|Body mass index [dup] (observable entity)|||C1305855|SNOMEDCT|||  
BMI|Body mass index procedure|C0005893||C0005893|MTH|||  
BMI|Body mass index:Ratio:Pt:^Patient:Qn|||C1542867|LNC|||  
BMI|Body mass index:Relative Density:Point in time:^Patient:Quantitative|||C1542867|LNC;MTH|||  
BMI|Bone marrow involvement|C1517677|||1|0.0009|  
BMI|Quetelet index (observable entity)|||C1305855|SNOMEDCT|||  
BMI|bicuculline methiodide|C0053558|||1|0.0133|1  
BMI|biomedical informatics|||1|  
BMI|body weight|C0005910;C1305866|||1|0.0006|  
BMI|brain-machine interface|||1|0.0009|  
BMP|BCNU/MTX/PCB|||C0279266|NCI;PDQ|||  
BMP|BMP;bmp|C0053932;C0279266||C0053932;C0279266|CHV;CSP;NCI;PDQ|||  
BMP|Bone Morphogenetic Protein;Bone Morphogenetic Proteins;Morphogenetic Protein, Bone;Morphogenetic Proteins, Bone;bone morphogenetic protein;bone morphogenetic proteins|C0053932|1|0.014|C0053932|CHV;CSP;MSH;MTH;NCI;NDFRT|1|1|1  
BMP|Bone Morphogenetic Proteins [Chemical/Ingredient]|||C0053932|NDFRT|||  
BMP|Carmustine/Methotrexate/Procarbazine;carmustine/methotrexate/procarbazine|||C0279266|NCI;PDQ|||  
BMP|basic metabolic profile||1|0.912|||1|

BMP|behavior management plan|||||||1  
BMP|bone marrow pressure|||||||1  
BMP|carmustine/methotrexate/procarbazine protocol|C0279266|||C0279266|MTH|||  
BM|BD|||C0005126|NCI|||  
BM|BERMUDA;Bermuda;bermuda;BMU;Bermuda  
Islands;Bermudas|C0005126|||C0005126|AOD;CHV;MSH;MTH;NCI;SNOMEDCT|||  
BM|BM|||C0005126;C0006416;C0011135;C1704651|MEDLINEPLUS;NCI|||  
BM|Barrett's metaplasia|C1862318|||||1|0.0037|  
BM|Bergersen medium|||||||1  
BM|Bermuda (geographic location)|||C0005126|SNOMEDCT|||  
BM|Birma;Burma;burma;MYANMAR;Myanma;Myanmar;myanmar;Union of  
Myanmar|C0006416|||C0006416|AOD;CHV;CSP;LCH;MSH;MTH;NCI;SNOMEDCT|||  
BM|Bohr magneton|||||||1  
BM|Bombyx mori|C0323309|||||1|0.0018|  
BM|Bone Measurements;Bone Measurements Domain;Bone Mineral Density Data  
Domain|C1704651|||C1704651|MTH;NCI|||  
BM|Bone marrow;bone marrow|C0005953|1|0.028|||1|0.7803|1  
BM|Bowel Function;Bowel function;bowel function;bowel functioning;Bowel  
Movement;Bowel movements;bowel movement;bowel movements;bowels movement;bowels  
movements;Bowel action;bowel action;Bowel habit;Bowel habits;Bowel habits,  
NOS;bowel habit;bowel habits;Bowel motion -  
function;Defaecation;Defecation;Defecation,  
NOS;Defecations;defaecation;defecation;Normal defecation;stool  
passing|C0011135|1|0.918|C0011135|AOD;CHV;CSP;GO;LCH;MEDLINEPLUS;MSH;MTH;NCI;SNO  
MEDCT|||1  
BM|Bowel action (observable entity)|||C0011135|SNOMEDCT|||  
BM|Burma (geographic location)|||C0006416|SNOMEDCT|||  
BM|Defecation (function)|||C0011135|SNOMEDCT|||  
BM|Defecation (observable entity)|||C0011135|SNOMEDCT|||  
BM|Defecation, function (observable entity)|||C0011135|SNOMEDCT|||  
BM|MM|C0439190|||C0006416|NCI|||  
BM|MMR|||C0006416|NCI|||  
BM|Passes stool completely|||C0011135|SNOMEDCT|||  
BM|Passes stool completely (finding)|||C0011135|SNOMEDCT|||  
BM|bacterial meningitis|C0085437|||||1|0.0094|1  
BM|basal medium|||||1|0.0018|1  
BM|basal membrane|||||||1  
BM|basal metabolism|C0678121|||||||1  
BM|basement membrane|C0004799|||||1|0.1198|1  
BM|basilar membrane|C0004816|||||1|0.024|1  
BM|betamethasone|C0005308|||||1|0.0039|  
BM|bicuculline methiodide|C0053558|||||1|0.0018|  
BM|biological monitoring|C0005517|||||1|0.0022|  
BM|biomedical|C1879848|||||||1  
BM|bleomycin|C0005740|||||1|0.0057|  
BM|blind matching|||||||1  
BM|blood meal|||||1|0.0049|  
BM|blood monitoring|||||||1  
BM|blood monocyte|C0026473|||||||1  
BM|body mass|C0518010|||||1|0.0199|1  
BM|bone marrow cells|C0005955|||||1|0.0026|  
BM|bone metastases;bone metastasis|C0153690|||||1|0.0053|1  
BM|brain metastases|C0220650|||||1|0.0061|  
BM|breast milk|C0026131;C0026140|1|0.050|||1|0.0018|1  
BM|bronchial mucosa|C0225600|||||1|0.0012|  
BM|buccal mass|||||||1  
BM|buccal mucosa|C0026639;C1280540;C1578559|||||1|0.0016|

BM|buccomesial|||||||1  
BM|bullous myringitis|C0155461|||||||1  
BM|butadiene monoxide|C0047001|||||1|0.002|  
BMT|BMT;bmt;BMT - Bone marrow transplant;bone marrow transplant (BMT);bone marrow transplant bmt;BONE MARROW TRANSPLANT;Bone Marrow Transplant;Bone marrow transplant;Bone marrow transplanted;bone marrow transplant;bone marrow transplants;Bone Marrow Grafting;Bone marrow graft;Graft of bone marrow NOS;Grafting of bone marrow NOS;Grafting, Bone Marrow;bone marrow graft;bone marrow grafting;Bone Marrow Transplantation;Transplantation of bone marrow;Transplantation of bone marrow, NOS;Transplantation, Bone Marrow;bone marrow transplantation;bone marrow transplantations;transplantation, bone marrow;Bone marrow transplant, not otherwise specified;Marrow Transplantation|C0005961|1|1|C0005961|CCS;CHV;COSTAR;CSP;DXP;ICD9CM;MEDLINEPLUS;MSH;MTH;NCI;PDQ;SNOMEDCT|1|0.9862|1  
BMT|BONE MARROW TRANSPL;TRANSPL BONE MARROW|||C0005961|MSH|||  
BMT|Basic Military Training|||||1|0.0031|  
BMT|Bone marrow transplant (procedure)|||C0005961|SNOMEDCT|||  
BMT|Bone marrow trnsplnt NOS|||C0005961|ICD9CM|||  
BMT|Buschke Memory Test|||||||1  
BMT|Graft of bone marrow NOS (procedure);Grafting of bone marrow NOS (procedure)|||C0005961|SNOMEDCT|||  
BMT|Transplantation of bone marrow (procedure)|||C0005961|SNOMEDCT|||  
BMT|basement membrane thickening|C0544995|||||||1  
BMT|basement membrane thickness|||||1|0.0023|1  
BMT|behavioral marital therapy|||||1|0.0038|1  
BMT|benign mesenchymal tumor|||||||1  
BMT|bilateral myringotomy tubes|||||||1  
BMT|bone marrow|C0005953|||||1|0.0046|  
BNP|B-Type Natriuretic Peptide;B-type natriuretic peptide|C0054015;C1095989|||C1095989|NCI|1|0.954|  
BNP|BNP|C1095989;C1417808;C2982014|||C1095989;C1417808;C2982014|NCI;OMIM|||  
BNP|Brain Natriuretic Peptide;brain natriuretic peptide;brain natriuretic peptides|C0054015|||C0054015;C1095989|CHV;MSH;NCI;NDFRT;SNOMEDCT|1|0.046|  
BNP|Brain Natriuretic Peptide Measurement;Brain natriuretic peptide measurement;Brain natriuretic peptide level|C1095989|||C1095989|MTH;NCI;SNOMEDCT|||  
BNP|Brain natriuretic peptide level (procedure)|||C1095989|SNOMEDCT|||  
BNP|Brain natriuretic peptide measurement (procedure)|||C1095989|SNOMEDCT|||  
BNP|NATRIURETIC PEPTIDE PRECURSOR B;NATRIURETIC PEPTIDE, BRAIN TYPE;NPPB Gene;NPPB gene;Natriuretic Peptide Precursor B Gene|C1417808|||C1417808|HUGO;MTH;NCI;OMIM|||  
BNP|NPPB|C0049330;C1417808|||C1417808|HUGO;NCI;OMIM|||  
BNP|NPPB wt Allele;Natriuretic Peptide Precursor B wt Allele|C2982014|||C2982014|MTH;NCI|||  
BNP|beta-natriuretic peptide||1|0.964|||||1  
BNP|brain natriuretic peptide (BNP) level test|||C1095989|CHV|||  
BNP|natriuretic peptide B|C1317554;C1417808|||C1417808|HUGO|||  
BOOP|BOOP;boop;Bronchiolitis Obliterans Organizing Pneumonia;Bronchiolitis obliterans organising pneumonia;Bronchiolitis obliterans organizing pneumonia;Bronchiolitis obliterans with organising pneumonia;Bronchiolitis obliterans with organizing pneumonia;bronchiolitis obliterans-organizing pneumonia;Cryptogenic Organizing Pneumonia;Cryptogenic Organizing Pneumonias;Cryptogenic organising pneumonia;Cryptogenic organizing pneumonia;Organizing Pneumonia, Cryptogenic;Organizing Pneumonias, Cryptogenic;Pneumonia, Cryptogenic Organizing;Pneumonias, Cryptogenic Organizing;cryptogenic organizing pneumonia;Cryptogenic organising pneumonitis;Cryptogenic organizing pneumonitis;bronchiolitis obliterans

organizing pneumonia  
(BOOP)|C0242770|1|1|C0242770|CHV;ICD9CM;MSH;MTH;NCI;NDFRT;SNOMEDCT|1|1|1  
BOOP|BOOP - Bronchiolitis obliterans and organising pneumonitis;BOOP -  
Bronchiolitis obliterans and organizing pneumonitis|||C0242770|SNOMEDCT|||  
BOOP|Bronchiolitis obliterans and organising pneumonitis;Bronchiolitis  
obliterans and organizing pneumonitis|||C0242770|SNOMEDCT|||  
BOOP|Bronchiolitis obliterans organizing pneumonia  
(disorder)|||C0242770|SNOMEDCT|||  
BOOP|COP|C0086825|||C0242770|NCI|||  
BOOP|COP - Cryptogenic organising pneumonitis;COP - Cryptogenic organizing  
pneumonitis|||C0242770|SNOMEDCT|||  
BOOP|Cryptogenic Organizing Pneumonia [Disease/Finding]|||C0242770|NDFRT|||  
BOOP|Cryptogenic organiz neu|||C0242770|ICD9CM|||  
BPH|BEP - Benign enlargement of prostate;BPH - Benign prostatic hypertrophy;BPH  
- benign prostatic hypertrophy;Benign Prostatic Hypertrophy;Benign prostatic  
hypertrophy;Hypertrophy, Benign Prostatic;Prostatic Hypertrophy, Benign;benign  
prostatic hypertrophy;Benign enlargement of prostate;Benign enlargement of  
prostate, NOS;benign prostate enlargement;Benign hypertrophy of prostate  
NOS;Hypertrophy (benign) of prostate;PROSTATE, HYPERTROPHY, BENIGN;benign  
prostate hypertrophy;Enlarged prostate - benign;benign enlarged  
prostate|C0005001|||C0005001|CHV;COSTAR;DXP;ICD9CM;ICPC;MEDLINEPLUS;MSH;MTH;MTHI  
CD9;NCI;SNOMEDCT|1|0.1329|  
BPH|BPH;Benign Hyperplasia of Prostate;Benign Hyperplasia of the Prostate;Benign  
Prostate Hyperplasia;benign hyperplasia of the prostate;benign prostate  
hyperplasia|C0005001;C1704272|||C0005001;C1704272|CHV;CSP;DXP;MEDLINEPLUS;NCI;OM  
IM;PDQ;SNOMEDCT|1|0.0061|  
BPH|Benign Prostatic Hyperplasia;Benign prostatic hyperplasia;Benign prostatic  
hyperplasia, NOS;PROSTATIC HYPERPLASIA, BENIGN;Prostatic Hyperplasia,  
Benign;benign prostatic hyperplasia;Benign Prostatic Hyperplasia - BPH;benign  
prostatic hyperplasia  
(BPH)|C0005001;C1704272;C2937421|1|1|C0005001;C1704272|CHV;CSP;LNC;MSH;MTH;NCI;O  
MIM;PDQ;SNOMEDCT|1|0.8443|1  
BPH|Benign prostatic hyper.;Prostatic hyper -benign|||C0005001|SNOMEDCT|||  
BPH|Benign prostatic hyperplasia (disorder)|||C1704272|SNOMEDCT|||  
BPH|Brown Planthopper|||1|0.0034|  
BPH|Hypertrophy-prost.ben. |||C0005001|SNOMEDCT|||  
BPH|Nodular hyperplasia of prostate  
gland|C1704272;C2937421|||C1704272|SNOMEDCT|||  
BPH|PROSTATIC HYPERPLASIA BENIGN <PROSTATISM>|||C1704272|QMR|||  
BPH|bacteriopheophytin|C0052909|||1|0.0038|1  
BPH|benign hyperplastic|||1|0.0041|  
BPH|benzo[a]pyrene hydroxylase|C0005080|||1|0.0034|  
BPH|buccopharyngeal|||1|  
BPH|hyperplastic prostate tissue|||1|0.002|  
BPH|prostate hyperplasia;prostatic  
hyperplasia|C0005001;C2937421|||C0005001|CHV|||  
BPH|prostate hypertrophy|C0005001;C1739363|||C0005001|CHV|||  
BPH|prostatic hypertrophy|C0005001;C1739363;C2937421|||C0005001|CHV|||  
BPP|BPP;CBPS;Congenital bilateral perisylvian syndrome;PERISYLVIAN SYNDROME,  
CONGENITAL BILATERAL;Perisylvian syndrome, congenital  
bilateral;PMGX;POLYMICROGYRIA, BILATERAL PERISYLVIAN;Polymicrogyria, bilateral  
perisylvian;Perisylvian syndrome|C1845668|||C1845668|MSH;OMIM;SNOMEDCT|||  
BPP|Bloembergen, Purcell, Pound|||1|  
BPP|Congenital bilateral perisylvian syndrome (disorder)|||C1845668|SNOMEDCT|||  
BPP|binding protein protease|||1|  
BPP|biophysical profile||1|1.000||1|0.2754|1  
BPP|bovine PP|||1|0.1014|

BPP|bovine pancreatic polypeptide|||||1|0.6232|1  
BPP|brachial plexus paralysis|C0541435|||||1  
BPP|bradykinin potentiating peptide|||||1  
BPP|breast parenchymal pattern|||||1  
BP|72-base-pair|||||1|0.0007|  
BP|BLEO/CDDP|||C0057191|NCI;PDQ|||  
BP|BLOOD PRESSURE;Blood Pressure;Blood pressure;Blood pressure, NOS;Pressure,  
Blood;blood  
pressure|C0005823;C1271104;C1272641|1|0.992|C0005823;C0005824|AOD;CHV;CSP;LCH;LN  
C;MEDLINEPLUS;MSH;MTH;NCI;SNOMEDCT|1|0.7029|1  
BP|BP;Bp;Binding Potential;binding  
potential|C2986841|||C0005823;C0005824;C0037623;C0057191;C1841672;C2986841|CHV;M  
TH;NCI;OMIM;PDQ|1|0.0092|  
BP|BP - Blood pressure|C0005823|||C0005823|SNOMEDCT|||  
BP|Back-Propagation;backpropagation|||||1|0.0026|  
BP|Bell palsy;Bell's palsy|C0015469;C0376175|||||1|0.0008|1  
BP|Bereitschaftspotential;bereitschaftspotential|C1704305|||C1704305|MSH|1|0.005  
7|  
BP|Bisphosphonates|C0012544|||||1|0.0019|  
BP|Bleomycin/Cisplatin;bleomycin/cisplatin|||C0057191|NCI;PDQ|||  
BP|Blood Pressure Determination;Blood Pressure Determinations;Blood pressure  
determination;Determination, Blood Pressure;Determinations, Blood Pressure;blood  
pressure determination;Blood pressure taking;Blood pressure taking, NOS;take  
blood pressure;taking blood  
pressure|C0005824|||C0005824|AOD;CHV;MSH;MTH;SNOMEDCT|||  
BP|Blood pressure (observable entity)|||C0005823|SNOMEDCT|||  
BP|Blood pressure taking (procedure)|||C0005824|SNOMEDCT|||  
BP|Bolton point|||||1  
BP|Bordetella pertussis|C0006017|||||1|0.0022|  
BP|Bp (binding peptide) haptoglobin beta polypeptide chain  
locus|||C1841672|MTH|||  
BP|British Pharmacopoeia|||||1|0.0011|  
BP|DDP-BLM protocol;bleomycin/cisplatin protocol|C0057191|||C0057191|MSH;MTH|||  
BP|Pharmacopoeia Britannica|||||1  
BP|SB|||C0037623|NCI|||  
BP|SLB|C0037623;C1825575|||C0037623|NCI|||  
BP|SOLOMON ISLANDS;Solomon Islands;Solomon  
islands|C0037623|||C0037623|AOD;MSH;MTH;NCI;SNOMEDCT|||  
BP|Solomon islands (geographic location)|||C0037623|SNOMEDCT|||  
BP|Systolic and diastolic blood pressures|||||1|0.0014|  
BP|[3H]benzo[a]pyrene|||||1|0.0011|  
BP|bacillary peliosis|C0343770|||||1  
BP|back pressure|||||1  
BP|bacterial pneumonia|C0004626|||||1|0.0007|  
BP|barometric pressure|C0237510|||||1  
BP|base pair;base pairs;basepairs|C0600436|||||1|0.1581|1  
BP|basic protein|||||1  
BP|basilar papilla|C1136024|||||1|0.0013|  
BP|bathroom privileges|||||1  
BP|bed pan|C0179263|||||1  
BP|beet pulp|||||1|0.0008|  
BP|before polarization|||||1  
BP|before present|||||1  
BP|behavior pattern|C0018464|||||1  
BP|bench press|C0454326|||||1|0.0013|  
BP|benz(a)pyrene|||||1|0.0027|  
BP|benzo(a)pyrene|C0005052|||||1|0.0207|

BP|benzo[alpha]pyrene|C1507317|||||1|0.0028|  
 BP|benzophenone|C0053233|||||1|0.0014|  
 BP|benzoyl peroxide|C0005088|||||1|0.0023|1  
 BP|benzpyrene|C0005097|||||1|  
 BP|benzylpenicillin|C0030827|||||1|0.0021|  
 BP|beta-protein|C1750295;C2362547|||||1|  
 BP|biliopancreatic||1|0.006|||||  
 BP|binding protein|C0242210|||||1|0.0066|1  
 BP|bioequivalence problem|||||1|  
 BP|biotic potential|||||1|  
 BP|biparietal|||||1|  
 BP|biphenyl|C0058372|||||1|0.0014|1  
 BP|bipolar|C0443156|||||1|0.0043|1  
 BP|bipolar affective disorder;bipolar disorder|C0005586|||||1|0.0051|  
 BP|birthplace|C0805310;C3202966|||||1|  
 BP|bladder pressure|||||1|  
 BP|blastic phase|||||1|0.0022|  
 BP|blood plasma|C0032105|||||1|0.0012|  
 BP|bodily pain|||||1|0.0015|1  
 BP|body part|C0229962|||||1|  
 BP|body plethysmography|C0032224|||||1|  
 BP|boiling point|C1257887|||C1257887|AOD;CHV|||1|  
 BP|borderline personality|C0006012|||||1|  
 BP|bovine pericardium|||||1|0.0015|  
 BP|bowenoid papulosis|C0334106|||||1|0.0016|1  
 BP|brachial plexus|C0006090;C1278841|||||1|0.0008|  
 BP|breech presentation|C0006157|||||1|  
 BP|brevipedicellus|||||1|0.0008|  
 BP|bronchopleural|C0450194;C0545668|||||1|  
 BP|bronchopulmonary|C0545675|||||1|  
 BP|buccopalpal|||||1|  
 BP|bullous pemphigoid|C0030805|||||1|0.0335|  
 BP|bullous pemphigus|C0262398|||||1|  
 BP|bypass|C0741847|||||1|  
 BP|metabolism of benzo[a]pyrene|||||1|0.0029|  
 BP|myelin basic protein|C0014063;C1417057|||||1|0.0113|  
 BP|point|C1552961;C2347617|||||1|0.0014|  
 BP|total biopterin|||||1|0.0004|  
 BSO|2-Amino-4-(S-butylsulfonimidoyl) Butanoic Acid;Butanoic Acid, 2-Amino-4-(S-butylsulfonimidoyl)-;Butanoic acid, 2-amino-4-(S-butylsulfonimidoyl)-  
 |||C0054252|MSH;NCI;NDFRT;PDQ|||  
 BSO|BSO;Buthionine Sulfoximine;Buthionine Sulphoximine;Sulfoximine, Buthionine;buthionine sulfoximine;buthionine sulphoximine;L-Buthionine Sulfoximine;L-Buthionine sulfoximine|C0054252|||C0054252|CSP;MSH;NCI;NDFRT;PDQ|1|0.7259|  
 BSO|Buthionine Sulfoximine [Chemical/Ingredient]|||C0054252|NDFRT|||  
 BSO|D,L-buthionine-S,R-sulfoximine;DL-buthionine-S,R-sulfoximine;d,l-Buthionine-s,r-sulfoximine|||C0054252|NCI;PDQ|1|0.066|  
 BSO|L-buthionine-(S,R)-sulfoximine|||||1|0.1624|  
 BSO|L-buthionine-SR-sulfoximine|||||1|0.0165|  
 BSO|R-sulfoximine|||||1|0.0178|  
 BSO|S-(3-Amino-3-carboxypropyl)-S-butylsulfoximine|||C0054252|NCI;PDQ|||  
 BSO|S-(n-Butyl)homocysteine Sulfoximine|||C0054252|NCI;PDQ|||  
 BSO|behavior, speech, other syndromes|||||1|  
 BSO|bilateral sagittal osteotomy|||||1|  
 BSO|bilateral salpingo-  
 oophorectomy|C0195495|1|1.000|C0195495|CHV;ICD9CM;NCI;SNOMEDCT|||1|

BSO|bilateral serous otitis|||||1  
BSO|bile salt output|||||1  
BSO|buthionine sulfoximide|||||1|0.0114|  
BUN|BUN|||C0005845;C0600137|AOD;MSH;MTH;NCI;SNOMEDCT|||  
BUN|BUN measurement;bun measurement;Blood Urea Nitrogen Measurement;Blood urea nitrogen measurement;Blood urea measurement|C0005845|||C0005845|CHV;MTH;NCI;SNOMEDCT|||  
BUN|Blood Urea;Blood urea;Urea - blood;blood urea;urea blood;Blood Urea Nitrogen;Blood urea nitrogen;Nitrogen, Blood Urea;Urea Nitrogen, Blood;blood urea nitrogen;blood urea nitrogen (BUN)|C0005845;C0600137|1|1|C0005845;C0600137|AOD;CHV;CSP;MSH;MTH;NCI;SNOMEDCT|1|0.9937|1  
BUN|Blood urea (procedure)|||C0005845|SNOMEDCT|||  
BUN|Blood urea measurement (procedure)|||C0005845|SNOMEDCT|||  
BUN|Blood urea nitrogen (substance)|||C0600137|SNOMEDCT|||  
BUN|Blood urea nitrogen concentration|||||1|0.0063|  
BUN|Blood urea nitrogen measurement (procedure)|||C0005845|SNOMEDCT|||  
BUN|blood urea nitrogen (BUN) level test||||C0005845|CHV|||  
BUN|bunion|C0006386|||||1  
BUN|urea nitrogen|C0600137;C1291218|||C0600137|NCI|||  
BUS|1, 4-Bis[methanesulfonyl]butane;1, 4-Bis(methanesulfonyl)butane;BSF;bsf;BU;BUSULFAN;Busulfan;Busulphan;busulfan;busulphan;Bussulfam;Busulfanum;Methanesulfonic Acid Tetramethylene Ester;Methanesulfonic acid, tetramethylene ester;Myeleukon;Sulfabutin;Tetramethylene Bis(methanesulfonate);Tetramethylene bis[methanesulfonate]|C0006463|||C0006463|CHV;CSP;LNC;MSH;MTH;MTHSPL;NCI;NDFRT;PDQ;RXNORM;SNOMEDCT;USPMG;VANDF|||  
BUS|1,4-Butanediol Dimethanesulfonate Esters|||C0006463|NCI;PDQ|||  
BUS|1,4-Butanediol Dimethylsulfonate|||C0006463|NCI;PDQ|||  
BUS|1,4-Butanediol, dimethanesulfonate|||C0006463|MSH;NDFRT|||  
BUS|1,4-Di(methanesulfonyloxy)butane|||C0006463|NCI;PDQ|||  
BUS|1,4-Di(methylsulfonyloxy)butane|||C0006463|NCI;PDQ|||  
BUS|BUS;Bus;Buses;bus;buses|C0336815;C1704736|||C0006463;C0336815;C1552509;C1704736|CHV;HL7V3.0;MSH;NCI;PDQ;SNOMEDCT|||  
BUS|Bartholin, urethral, and Skene||1|1.000||||1  
BUS|Bus - Transportation Service|C1552509|||C1552509|MTH|||  
BUS|Bus Device Component|C1704736|||C1704736|MTH;NCI|||  
BUS|Busulfan (product)|||C0006463|SNOMEDCT|||  
BUS|Busulfan (substance)|||C0006463|SNOMEDCT|||  
BUS|Busulfan [Chemical/Ingredient]|||C0006463|NDFRT|||  
BUS|Motor bus;Motor bus, device|C0336815|||C0336815|MTH;SNOMEDCT|||  
BUS|Motor bus, device (physical object)|||C0336815|SNOMEDCT|||  
BUS|bladder ultrasound|C0855956|||||1  
BUS|bulbourethral sling|||||1  
BUS|buspirone|C0006462|||||1|1|  
C&S|conjunctiva and sclera;conjunctivae and sclerae||1|0.868||||1  
C&S|cough and sneeze|||||1  
C&S|culture and sensitivity||1|0.094||||1  
C&S|culture and susceptibility|C0430388|||||1  
C&S|protein C and protein S||1|0.032||||1  
C3|(complement) component 3;COMPLEMENT COMPONENT 3;Complement Component 3;Complement component 3;Component 3, Complement;complement component 3|C0009506;C1332656|1|0.486|C0009506;C1332656|HUGO;MSH;NCI;NDFRT;OMIM;SNOMEDCT|1|0.1041|  
C3|(stage) C3|C0441788|1|0.004||||1

C3|C3;Complement C3  
Measurement|C2699419|||C0009506;C0456881;C1305853;C1332656;C2699419|FMA;HUGO;MTH  
;NCI;OMIM;SNOMEDCT;UWDA|||  
C3|C3 - Complement component 3;Complement 3;complement 3;Complement component  
C3;Complement component C3, NOS;c3 complement component;complement component  
c3|C0009506|||C0009506|CHV;MSH;MTH;NDFRT;SNOMEDCT|1|0.0571|  
C3|C3 - TNM certainty factor;TNM certainty factor C3;C3  
certainty|C0456881|||C0456881|MTH;SNOMEDCT|||  
C3|C3 - TNM certainty factor (tumor staging)|||C0456881|SNOMEDCT|||  
C3|C3 Complement;C3, Complement;Complement C3;Complement, C3;c3  
complement;complement C3;complement  
c3|C0009506;C2699419|||C0009506;C2699419|CHV;LNC;MSH;NCI;NDFRT|1|0.0143|  
C3|C3 Gene;C3 gene;C3c;CPAMD1;Complement Component 3  
Gene|C1332656|||C1332656|HUGO;MTH;NCI;OMIM|||  
C3|C3 and PZP-Like Alpha-2-Macroglobulin Domain-Containing Protein  
1|||C0009506|NCI|||  
C3|C3 certainty (qualifier value)|||C0456881|SNOMEDCT|||  
C3|C3 certainty (tumor staging)|||C0456881|SNOMEDCT|||  
C3|C3 innervation|C1305853|||C1305853|MTH|||  
C3|C3 (H2O)|||C0009506|SNOMEDCT|||  
C3|C3 (H2O) (substance)|||C0009506|SNOMEDCT|||  
C3|C3H/HeJ|||1|0.0429|  
C3|C3d|C1332656;C2826008;C3151071|||C1332656|OMIM|||  
C3|COMPLEMENT C 03|||C0009506|MSH|||  
C3|Clostridium botulinum C3 exoenzyme|||1|0.0102|  
C3|Collins solution|C0056123|||1|  
C3|Complement -third component-C3|||C0009506|SNOMEDCT|||  
C3|Complement C3 [Chemical/Ingredient]|||C0009506|NDFRT|||  
C3|Complement component 3 (procedure)|||C0009506|SNOMEDCT|||  
C3|Complement component C3 (substance)|||C0009506|SNOMEDCT|||  
C3|Flaveria pringlei|C0996999|||1|0.0143|  
C3|cervical (level) 3||1|0.498|||  
C3|complement factor 3|||1|0.0531|  
C3|propionylcarnitine|C0072196|1|0.012|||  
C3|third|C0205437|||1|0.0571|  
C3|third carpal bone|C0223733|||1|0.0245|  
C3|third cervical (c3) nerve|||C1305853|CHV|||  
C3|third cervical vertebra|C0459939|||C0459939|FMA;SNOMEDCT;UWDA|||  
C3|third complement component;third component of complement|||1|0.5755|  
C3|third component|||1|0.0469|  
C4|(PO Box) C4||1|0.002|||  
C4|(complement) component 4;Complement Component 4;Complement Component-  
4;Complement component 4;Component 4, Complement;complement component 4;C4 -  
Complement component 4;C4 Complement Component;Complement Component,  
C4;Complement component C4;Complement component C4, NOS;Component, C4  
Complement;complement component c4;Complement 4;complement  
4|C0009516|1|0.462|C0009516|CHV;MSH;MTH;NCI;NDFRT;SNOMEDCT|1|0.1149|  
C4|ACIDIC C4;C4A gene;C4A2;C4A3;C4A4;C4A6;COMPLEMENT COMPONENT  
4S;CPAMD2;RG|C1412999|||C1412999|HUGO;MTH;OMIM|||  
C4|C4;C4S|C0577608;C1412999|||C0009516;C0456882;C0577608;C1305858;C1412999|FMA;H  
UGO;NCI;OMIM;SNOMEDCT;UWDA|||  
C4|C4 - TNM certainty factor;TNM certainty factor C4;C4  
certainty|C0456882|||C0456882|MTH;SNOMEDCT|||  
C4|C4 - TNM certainty factor (tumor staging)|||C0456882|SNOMEDCT|||  
C4|C4 Complement;C4, Complement;Complement C4;Complement, C4;complement  
c4|C0009516;C0577608|||C0009516;C0577608|CHV;LNC;MSH;NCI;NDFRT|||  
C4|C4 certainty (qualifier value)|||C0456882|SNOMEDCT|||

C4|C4 certainty (tumor staging)|||C0456882|SNOMEDCT|||  
C4|C4 complement assay;C4 complement assay (procedure);Complement C4  
Measurement;Complement C4 measurement;Complement component 4  
test|C0577608|||C0577608|MTH;NCI;SNOMEDCT|||  
C4|C4 innervation|C1305858|||C1305858|MTH|||  
C4|C4A|C0523345;C1412999|||C1412999|HUGO;OMIM|||  
C4|C4B|||C1412999|HUGO|||  
C4|C<sub>4</sub> complement assay|||C0577608|SNOMEDCT|||  
C4|C<sub>4</sub> complement assay (procedure)|||C0577608|SNOMEDCT|||  
C4|C>4< complement assay|||C0577608|SNOMEDCT|||  
C4|C>4< complement assay (procedure)|||C0577608|SNOMEDCT|||  
C4|C04|C1412999;C1413000|||C1412999|HUGO|||  
C4|COMPLEMENT C 04|||C0009516|MSH|||  
C4|COMPLEMENT COMPONENT 4A|C0009517;C1412999|||C1412999|OMIM|||  
C4|Complement C4 [Chemical/Ingredient]|||C0009516|NDFRT|||  
C4|Complement component 4 (procedure)|||C0009516|SNOMEDCT|||  
C4|Complement component 4 (substance)|||C0009516|SNOMEDCT|||  
C4|Complement component C4 (substance)|||C0009516|SNOMEDCT|||  
C4|Complement component C4 (substance) [Ambiguous]|||C0009516|SNOMEDCT|||  
C4|Complement-fourth component-C4|||C0009516|SNOMEDCT|||  
C4|F trinervia|||1|0.0068|  
C4|Flaveria trinervia|C0997000|||1|0.0743|  
C4|RODGERS BLOOD GROUP|||C1412999|OMIM|||  
C4|RODGERS FORM OF C4|||C1412999|OMIM|||  
C4|cervical (level) 4||1|0.522|||  
C4|complement component 4A (Rodgers blood group)|||C1412999|HUGO|||  
C4|fourth cervical (c4) nerve|||C1305858|CHV|||  
C4|fourth cervical vertebra|C0459941|||C0459941|FMA;SNOMEDCT;UWDA|||  
C4|fourth complement component;fourth component of complement|||1|0.804|  
C5|(complement) component 5;COMPLEMENT COMPONENT 5;Complement Component  
5;Complement component 5;Component 5, Complement;complement component  
5|C0009519;C1367710|1|0.008|C0009519;C1367710|HUGO;MSH;NCI;NDFRT;OMIM;SNOMEDCT|1  
|0.0513|  
C5|C3 and PZP-Like Alpha-2-Macroglobulin Domain-Containing Protein  
4|||C0009519|NCI|||  
C5|C5|||C0009519;C0456883;C1305859;C1367710|FMA;HUGO;NCI;OMIM;SNOMEDCT;UWDA|||  
C5|C5 - Complement component 5;C5 Complement;C5, Complement;Complement  
C5;Complement, C5;c5 complement;complement c5;Complement 5;complement  
5;Complement component C5;Complement component C5, NOS;complement component  
c5|C0009519|||C0009519|CHV;LNC;MSH;MTH;NCI;NDFRT;SNOMEDCT|||  
C5|C5 - TNM certainty factor;TNM certainty factor C5;C5  
certainty|C0456883|||C0456883|MTH;SNOMEDCT|||  
C5|C5 - TNM certainty factor (tumor staging)|||C0456883|SNOMEDCT|||  
C5|C5 Gene;C5 gene;CPAMD4;Complement Component 5  
Gene|C1367710|||C1367710|HUGO;MTH;NCI|||  
C5|C5 certainty (qualifier value)|||C0456883|SNOMEDCT|||  
C5|C5 certainty (tumor staging)|||C0456883|SNOMEDCT|||  
C5|C5 innervation|C1305859|||C1305859|MTH|||  
C5|C5(-OH acylcarnitine)||1|0.010|||  
C5|COMPLEMENT C 05|||C0009519|MSH|||  
C5|Complement C5 [Chemical/Ingredient]|||C0009519|NDFRT|||  
C5|Complement component C5 (substance)|||C0009519|SNOMEDCT|||  
C5|cervical (level) 5||1|0.982|||  
C5|fifth cervical (c5) nerve|||C1305859|CHV|||  
C5|fifth cervical vertebra|C0459943|||C0459943|FMA;SNOMEDCT;UWDA|||  
C5|fifth complement component;fifth component of complement|||1|0.7692|  
C5|fifth component|||1|0.1026|

C5|five or more coughs|||||1|0.0769|  
C6|C6||||C1305860;C1413014;C1419009|FMA;HUGO;OMIM;UWDA|||  
C6|C6 (acylcarnitine)||1|0.004||||  
C6|C6 gene|C1413014||C1413014|HUGO;MTH|||  
C6|C6 innervation|C1305860||C1305860|MTH|||  
C6|COMPLEMENT COMPONENT 6;complement component  
6|C0009523;C1413014||C0009523;C1413014|HUGO;MSH;NDFRT;OMIM;SNOMEDCT|||  
C6|HSPC;PROTEASOME SUBUNIT ALPHA-4;PROTEASOME SUBUNIT, ALPHA-TYPE, 7;PSMA7;PSMA7  
gene;RC6-1;XAPC7;proteasome subunit RC6-1;proteasome subunit  
XAPC7|C1419009||C1419009|HUGO;MTH;OMIM|||  
C6|cervical (level) 6||1|0.992||||  
C6|complement 6|C0009523||C0009523|MSH;NDFRT|||  
C6|hexamethonium|C0062637||||1|0.339|1  
C6|proteasome (prosome, macropain) subunit, alpha type, 7||||C1419009|HUGO|||  
C6|rat glioma|||||1|0.2458|  
C6|sixth|C0205440||||1|0.0847|  
C6|sixth cervical|||||1|0.0424|  
C6|sixth cervical (c6) nerve||||C1305860|CHV|||  
C6|sixth cervical vertebra|C0459944||C0459944|FMA;SNOMEDCT;UWDA|||  
C6|sixth complement component;sixth component of complement|||||1|0.2458|  
C6|sixth component|||||1|0.0424|  
C7|C7||||C1305861;C1367714;C1413019;C1706327|FMA;HUGO;NCI;OMIM;UWDA|||  
C7|C7 gene|C1413019||C1413019|HUGO;MTH|||  
C7|C7 innervation|C1305861||C1305861|MTH|||  
C7|CHEMOKINE, CXC MOTIF, LIGAND 10;CXCL10 Gene;CXCL10 gene;SMALL INDUCIBLE  
CYTOKINE SUBFAMILY B, MEMBER 10|C1367714||C1367714|HUGO;MTH;NCI;OMIM|||  
C7|COMPLEMENT COMPONENT 7;complement component  
7|C0009524;C1413019||C0009524;C1413019|HUGO;MSH;NDFRT;OMIM;SNOMEDCT|||  
C7|CRG-2;crq-2;IFI10;INP10;MOB-1;mob-1;SCYB10;qIP-  
10|C1367714;C1706327||C1367714;C1706327|HUGO;NCI;OMIM|||  
C7|CXCL10||||C1367714|HUGO;NCI;OMIM|||  
C7|CXCL10 wt Allele|C1706327||C1706327|MTH;NCI|||  
C7|Chemokine (C-X-C Motif) Ligand 10 Gene||||C1367714|NCI|||  
C7|Chemokine (C-X-C Motif) Ligand 10 wt Allele||||C1706327|NCI|||  
C7|INTERFERON-GAMMA-INDUCED FACTOR||||C1367714|OMIM|||  
C7|INTERFERON-GAMMA-INDUCIBLE PROTEIN 10|C1367714;C1522712||C1367714|OMIM|||  
C7|IP-10|C1522712||C1367714;C1706327|HUGO;NCI|||  
C7|IP10||||C1367714|OMIM|||  
C7|MOB1, MOUSE, HOMOLOG OF||||C1367714|OMIM|||  
C7|cervical (level) 7||1|1.000||||  
C7|chemokine (C-X-C motif) ligand 10||||C1367714|HUGO|||  
C7|complement 7|C0009524||C0009524|MSH;NDFRT|||  
C7|seventh cervical|||||1|0.2941|  
C7|seventh cervical (c7) nerve||||C1305861|CHV|||  
C7|seventh cervical vertebra|C0223176||C0223176|FMA;MTH;SNOMEDCT;UWDA|||  
C7|seventh component of complement|||||1|0.7059|  
CABG|ACB graft||||C0010055|SNOMEDCT|||  
CABG|Aortocoronary Bypass;Aortocoronary Bypasses;Aortocoronary bypass  
NOS;Bypass, Aortocoronary;Bypasses, Aortocoronary;aortocoronary  
bypass;Aortocoronary artery bypass graft;Aortocoronary bypass for heart  
revascularisation;Aortocoronary bypass for heart revascularization;Aortocoronary  
bypass for heart revascularization, NOS;Aortocoronary bypass for heart  
revascularization, not otherwise specified;Artery Bypass, Coronary;Artery  
Bypasses, Coronary;Bypass, Coronary Artery;Bypasses, Coronary Artery;CORONARY  
ARTERY BYPASS;Coronary Artery Bypass;Coronary Artery Bypasses;coronary artery  
bypass;Bypass Surgery, Coronary Artery;Coronary Artery Bypass Surgery;coronary  
artery bypass surgery;Bypass anastomosis for heart revascularization;CABG;CAG -

Coronary artery graft;CBG - Coronary bypass graft;CORONARY BYPASS;Coronary bypass;coronary bypass;Cardiac revascularisation with aortocoronary bypass anastomosis;Cardiac revascularization with aortocoronary bypass anastomosis;Cardiac revascularisation with bypass anastomosis;Cardiac revascularization with bypass anastomosis, NOS;Coronary artery bypass graft operations;Vascular aortocoronary bypass;coronary bypass surgery|C0010055|||C0010055|AOD;CHV;COSTAR;CSP;ICD9CM;MEDLINEPLUS;MSH;MTH;NCI;SNOMEDCT|1|0.0693|

CABG|Aortocoronary artery bypass graft (procedure)|||C0010055|SNOMEDCT|||

CABG|BYPASS SURG CORONARY ARTERY;CORONARY ARTERY BYPASS SURG|||C0010055|MSH|||

CABG|CAB|C0010055;C1417778;C2986493|||C0010055|NCI|||

CABG|CAB graft|||C0010055|SNOMEDCT|||

CABG|CABG - Coronary artery bypass graft;Coronary artery bypass graft (CABG);Coronary Artery Bypass Graft;Coronary Artery Bypass Grafting;Coronary artery bypass graft;Coronary artery bypass grafting;coronary artery bypass graft;coronary artery bypass grafting|C0010055;C1260596|1|1|C0010055;C1260596|CCS;CHV;MEDLINEPLUS;MSH;NCI;SNOMEDCT|1|0.8542|1

CABG|Cardiac revascularization with bypass anastomosis (procedure)|||C0010055|SNOMEDCT|||

CABG|Coronary A. operations|||C0010055|SNOMEDCT|||

CABG|Coronary artery bypass graft (procedure);Coronary artery bypass grafting (procedure)|||C0010055|SNOMEDCT|||

CABG|Coronary artery bypass graft (procedure) [Ambiguous]|||C0010055|SNOMEDCT|||

CABG|Coronary artery operations|C0190188|||C0010055|SNOMEDCT|||

CABG|Coronary artery operations (& bypass)|||C0010055|SNOMEDCT|||

CABG|Coronary artery operations (& bypass) (procedure)|||C0010055|SNOMEDCT|||

CABG|Heart Bypass|C0007202;C0010055|||C0010055|NCI|||

CABG|bypass graft operation|||1|0.0017|

CABG|coronary artery bypass graft (GABG)|||C0010055|CHV|||

CABG|coronary artery bypass graft surgery|||1|0.0724|

CABG|coronary revascularization|C0877341|||1|0.0024|

CAD|AD|||C0280573|PDQ|||

CAD|ARA-C/DNR|||C0280573|NCI;PDQ|||

CAD|ARTERIOSCLEROSIS CORONARY ARTERY;Coronary artery arteriosclerosis;ARTERIOSCLEROTIC HEART DISEASE;Arteriosclerotic heart disease;arteriosclerotic heart disease;ASHD;ATHEROSCLEROTIC CORONARY VASCULAR DISEASE;ATHEROSCLEROTIC HEART DISEASE;Atherosclerotic heart disease;atherosclerotic heart disease;Arterioscleroses, Coronary;Arteriosclerosis, Coronary;CORONARY ARTERIOSCLEROSIS;Coronary Arterioscleroses;Coronary Arteriosclerosis;Coronary arteriosclerosis;coronary arteriosclerosis;CORONARY SCLEROSIS;Coronary sclerosis;coronary sclerosis;Coronary artery sclerosis;coronary artery atherosclerosis|C0010054|||C0010054|CHV;COSTAR;CST;DXP;LNC;MEDLINEPLUS;MSH;MTH;MTHICD9;QMR;SNOMEDCT|||

CAD|ASHD - Atherosclerotic heart disease|||C0010054|SNOMEDCT|||

CAD|Artery Disease, Coronary;Artery Diseases, Coronary;CORONARY ARTERY DISEASE;Coronary Artery Disease;Coronary Artery Diseases;Coronary artery disease;Coronary artery disease, NOS;DISEASE CORONARY ARTERY;Disease of the coronary arteries;Disease, Coronary Artery;Diseases, Coronary Artery;coronary artery disease;coronary artery diseases|C0010054;C0010068;C1956346|1|1|C0010054;C0010068;C1956346|CHV;COSTAR;CSP;CST;DXP;LNC;MEDLINEPLUS;MSH;MTH;NCI;NDFRT;OMIM;SNOMEDCT|1|0.9018|1

CAD|Atheroscleroses, Coronary;Atherosclerosis, Coronary;CORONARY ATHEROSCLEROSIS;Coronary Atheroscleroses;Coronary Atherosclerosis;Coronary

atherosclerosis;coronary  
atherosclerosis|C0010054;C2733225|||C0010054|CCS;CHV;DXP;ICD9CM;MEDLINEPLUS;MSH;  
NCI;OMIM;SNOMEDCT|1|0.0018|  
CAD|B4GALNT2;B4GALNT2 gene;GALGT2|C1428349|||C1428349|HUGO;MTH;OMIM|||  
CAD|BETA-1, 4-N-ACETYL-GALACTOSAMINYLTRANSFERASE 2|||C1428349|OMIM|||  
CAD|BLOOD GROUP--Cad SYSTEM|C1862195|||C1862195|MTH;OMIM|||  
CAD|CAD;Cad|||C0010054;C0010068;C0011905;C0170509;C0280573;C1413078;C1413983;C1  
428349;C1862195;C1956346|DXP;HUGO;MEDLINEPLUS;NCI;OMIM;PDQ|||  
CAD|CAD (coronary artery disease);CAD - Coronary artery disease;CORONARY ARTERY  
DISORDER;CORONARY ARTERY DISORDER (NOS);DISORDER CORONARY ARTERY;Disorder of  
coronary artery;coronary artery  
disorder|C1956346|||C1956346|AOD;CSP;CST;SNOMEDCT|||  
CAD|CAD Gene;CAD gene;CAD TRIFUNCTIONAL  
PROTEIN|C1413078|||C1413078|HUGO;MTH;NCI;OMIM|||  
CAD|CARBAMOYL PHOSPHATE SYNTHETASE/ASPARTATE  
TRANSCARBAMOYLASE/DIHYDROOROTASE|||C1413078|OMIM|||  
CAD|CASPASE-ACTIVATED DNase;Caspase-activated  
DNase|C0669174;C1413983|||C1413983|OMIM|1|0.0065|  
CAD|CHD (coronary heart disease);CHD - Coronary heart disease;CORONARY  
DISEASE;Coronary Disease;Coronary Diseases;Disease, Coronary;Diseases,  
Coronary;coronary disease;coronary diseases;coronary  
disorder|C0010068|||C0010068|CHV;CSP;CST;DXP;MSH;NCI;NDFRT;SNOMEDCT|||  
CAD|CIA|||C0170509|NCI;PDQ|||  
CAD|COMPUTER ASSISTED DIAG;DIAG COMPUTER ASSISTED|||C0011905|MSH|||  
CAD|CORONARY ARTERY DIS|||C1956346|MSH|||  
CAD|CORONARY DIS|||C0010068|MSH|||  
CAD|CORONARY HEART DIS|||C0010068|MSH|||  
CAD|CPAN;DEOXYRIBONUCLEASE III, CASPASE-ACTIVATED;DFP-40;DFP2;DFP40;DFPB;DFPB  
gene;DNA FRAGMENTATION FACTOR, 40-KD, BETA  
SUBUNIT|C1413983|||C1413983|HUGO;MTH;OMIM|||  
CAD|CPSase/ATCase/DHOase|||C1413078|OMIM|||  
CAD|CTX/DOX/DTIC|||C0170509|NCI;PDQ|||  
CAD|Carbamoyl-Phosphate Synthetase 2, Aspartate Transcarbamylase, and  
Dihydroorotase Gene|||C1413078|NCI|||  
CAD|Cervical artery dissection|||1|0.0034|  
CAD|Cinnamyl alcohol dehydrogenase;cinnamyl alcohol  
dehydrogenase|C0055763|||C0055763|MSH|1|0.0031|  
CAD|Computer Assisted Diagnosis;Computer-Assisted Diagnosis;Diagnosis, Computer  
Assisted;Diagnosis, Computer-Assisted;computer assisted diagnosis;computer-  
assisted diagnosis;Computer-Aided Diagnosis;computer-aided diagnosis;Computer-  
Assisted Diagnoses;Diagnoses, Computer-  
Assisted|C0011905|||C0011905|AOD;CHV;CSP;MSH;MTH;NCI|1|0.0193|1  
CAD|Coronary Artery Disease [Disease/Finding]|||C1956346|NDFRT|||  
CAD|Coronary Disease [Disease/Finding]|||C0010068|NDFRT|||  
CAD|Coronary Heart Disease;Coronary Heart Diseases;Coronary heart  
disease;Disease, Coronary Heart;Diseases, Coronary Heart;Heart Disease,  
Coronary;Heart Diseases, Coronary;coronary heart disease;coronary heart  
diseases|C0010054;C0010068|||C0010054;C0010068|AOD;CHV;CSP;LCH;MSH;MTH;NCI;NDFRT  
;SNOMEDCT|||  
CAD|Coronary arteriosclerosis (disorder)|||C0010054|SNOMEDCT|||  
CAD|Coronary artery disease (disorder)|||C1956346|SNOMEDCT|||  
CAD|Coronary atherosclerosis (disorder)|||C0010054|SNOMEDCT|||  
CAD|CyADIC chemotherapy protocol;CyADIC protocol;CyADIC  
regimen;cyclophosphamide/dacarbazine/doxorubicin  
protocol|C0170509|||C0170509|CHV;MSH;MTH|||  
CAD|Cyclophosphamide/Dacarbazine/Doxorubicin;cyclophosphamide/dacarbazine/doxoru  
bicin|||C0170509|NCI;PDQ|||

CAD|Cytarabine/Daunorubicin;cytarabine/daunorubicin||||C0280573|NCI;PDQ|||  
CAD|DA|C1602374||||C0280573|NCI;PDQ|||  
CAD|DNA fragmentation factor, 40kDa, beta polypeptide (caspase-activated DNase)||||C1413983|HUGO|||  
CAD|Disorder of coronary artery (disorder)||||C1956346|SNOMEDCT|||  
CAD|HEART: CORONARY ARTERY||||C1956346|CST|||  
CAD|Sda|C0276477;C1428349;C1553165||||C1428349|HUGO|||  
CAD|beta-1,4-N-acetyl-galactosaminyl transferase 2|C0648330||||C1428349|HUGO|||  
CAD|cadaver|C0006629||||C0006629|CHV;CSP;MSH;NDFRT;SNOMEDCT|||1  
CAD|cadaver donor|C0524354;C1548660|||||1  
CAD|cadaveric|||||1|0.0031|1  
CAD|cadaveric donor|||||1|0.0013|  
CAD|calcium alginate dressing|||||1  
CAD|caldesmon|C0006746|||||1  
CAD|carbamoyl-phosphate synthetase 2, aspartate transcarbamylase, and dihydroorotase||||C1413078|HUGO|||  
CAD|cardiac ischaemia;cardiac ischemia;ischaemic heart disease;myocardial ischaemia;myocardial ischemia|C0010054;C0151744||||C0010054|CHV|||  
CAD|caspase-activated deoxyribonuclease|C0669174||||C0669174|MSH;MTH|1|0.0016|  
CAD|chronic actinic dermatitis|C1510437||||C1510437|CHV;MSH;SNOMEDCT|1|0.005|1  
CAD|chronic airways disease|C0024117|||||1  
CAD|chronic allograft dysfunction|||||1|0.0015|  
CAD|coenzyme A dehydrogenase|||||1  
CAD|cold agglutinin disease|C0175816||||C0175816|CHV;MSH;SNOMEDCT|||1  
CAD|collision-activated dissociation|||||1|0.0029|  
CAD|collisionally activated decomposition|||||1|0.0023|  
CAD|collisionally activated dissociation|||||1|0.0101|1  
CAD|compound absorption device|||||1  
CAD|compressed-air disease|C0011119|||||1  
CAD|computer-aided design|C0162517||||C0162517|MSH|1|0.0146|  
CAD|computer-aided detection|||||1|0.0159|1  
CAD|computer-aided diagnostic|||||1|0.0024|  
CAD|computer-assisted dialogue|||||1  
CAD|congenital abduction deficiency|||||1  
CAD|constitutive activation domain|||||1|0.001|  
CAD|coronary artery diameter|||||1|0.0008|  
CAD|coronary atheroma|C0010054;C0264683||||C0010054|CHV|||  
CAD|coronoradiographic documentation|||||1  
CAD|cyclophosphamide, dacarbazine, and doxorubicin chemotherapy protocol||||C0170509|CHV|||  
CAD|cytarabine/daunorubicin (CAD)||||C0280573|CHV|||  
CAD|cytarabine/daunorubicin protocol||||C0280573|MTH|||  
CAD|smooth muscle caldesmon|||||1|0.0015|  
CA|(7R)-7-(4-carboxybutanamido)cephalosporanate amidohydrolase activity||||C2314861|GO|||  
CA|(Neoplasms) or (cancers)||||C0006826|SNOMEDCT|||  
CA|(Neoplasms) or (cancers) (disorder)||||C0006826|SNOMEDCT|||  
CA|7beta-(4-carboxybutanamido)cephalosporanic acid acylase activity||||C2314861|GO|||  
CA|AC|C1879503||||C0050385|PDQ|||  
CA|AC chemotherapy protocol;AC protocol;CA protocol;Cyclophosphamide/Doxorubicin;Doxorubicin/Cyclophosphamide;cyclophosphamide/doxorubicin;doxorubicin cyclophosphamide;cyclophosphamide/doxorubicin protocol|C0050385||||C0050385|CHV;MSH;MTH;NCI;PDQ|||  
CA|ACE;ACe|C0022709;C0201888||||C0050385|CSP;NCI;PDQ|||  
CA|Ammon Horn;Ammon's Horn;Ammon's horn;Ammons Horn;Horn, Ammon;Horn, Ammon's;ammon's horn;Cornu Ammonis;Cornu ammonis;cornu

ammonis;Hippocampal;Hippocampal structure;Hippocampus (Brain);Hippocampus major;Hippocampus proprius|C0019564|||C0019564|AOD;CHV;CSP;FMA;LCH;MSH;MTH;NCI;SNOMEDCT|1|0.0066|CA|Assay|C0005507;C0243073;C1510438|||1|0.0021|CA|BLOOD COAG FACTOR IV|||C0006675|MSH|||CA|Blood Coagulation Factor IV;Ca - Calcium;Ca element;Ca++ element;Calcium coagulation factor;Coagulation Factor IV;Coagulation factor IV;Factor IV, Coagulation;Factor IV;factor iv;[TN420]CALCIUM|C0006675|||C0006675|CHV;CSP;LNC;MSH;NDFRT;SNOMEDCT|||CA|CA;Ca|||C0006675;C0006754;C0006823;C0006826;C0019564;C0050385;C0201925;C2314861|AOD;CHV;GO;NCI;PDQ|||CA|CA - Cancer;Cancer, unspecified site;Malignancy, unspecified site;Malignant neoplasm without specification of site;Malignant neoplastic disease;malignant tumoral disease|C0006826|||C0006826|AOD;CCS;ICD9CM;MTHICD9;SNOMEDCT|||CA|CALCIUM;Calcium;Calcium (NOS);Calcium, NOS;calcium;calciums|C0006675;C0006726;C2936886|||C0006675;C0201925|AOD;CHV;CSP;LCH;LNC;MEDLINEPLUS;MSH;MTH;MTHSPL;NCI;NDFRT;RXNORM;SNOMEDCT;USPMG;VANDF|1|0.286|1CA|CAN|||C0006823|NCI|||CA|CANADA;Canada|C0006823|||C0006823|AOD;CHV;CSP;HL7V3.0;LCH;MSH;MTH;NCI;SNOMEDCT|||CA|CANCER;CANCER (NOS);Cancer;Cancers;cancer;cancers|C0006826;C0998265;C1306459|1|0.782|C0006826;C0998265;C1306459;C1547140|AOD;CHV;CSP;CST;DXP;HL7V2.5;LCH;LNC;MEDLINEPLUS;MSH;NCBI;NCI;PDQ;SNOMEDCT|1|0.0059|1CA|COAG FACTOR IV|||C0006675|MSH|||CA|CTX/DOX|||C0050385|NCI;PDQ|||CA|Ca - unspecified site;Ca - unspecified site NOS|||C0006826|SNOMEDCT|||CA|Ca - unspecified site NOS (disorder)|||C0006826|SNOMEDCT|||CA|Calcium (substance)|||C0006675|SNOMEDCT|||CA|Calcium Measurement;Calcium measurement;Calcium measurement, NOS;calcium measurement;calcium measurements;Calcium.total;calcium level test;total calcium test|C0201925|||C0201925|CHV;LNC;MTH;NCI;SNOMEDCT|||CA|Calcium [Chemical/Ingredient]|||C0006675|NDFRT|||CA|Calcium analyte|||C0006675|SNOMEDCT|||CA|Calcium analyte (substance)|||C0006675|SNOMEDCT|||CA|Calcium level;calcium level;calcium levels|C0201925;C0428302|||C0201925|CHV;SNOMEDCT|||CA|Calcium measurement (procedure)|||C0201925|SNOMEDCT|||CA|California|C0006754;C0324542;C3146274|1|0.004|C0006754|AOD;CHV;LCH;LNC;MSH;MTH;NCI;SNOMEDCT|1|0.0024|1CA|California (geographic location)|||C0006754|SNOMEDCT|||CA|Canada (geographic location)|||C0006823|SNOMEDCT|||CA|Candida albicans|C0006837;C0717551|||1|0.0108|1CA|Caucasian American|C0221786|||1|0.001|CA|Cholic|||1|0.0031|CA|Chromosome aberrations;chromosome aberration;chromosomal aberration;chromosomal aberrations|C0008625;C0008626|||C0008625|CHV;CSP;MSH;NCI|1|0.0624|1CA|Coagulation factor IV (substance)|||C0006675|SNOMEDCT|||CA|Coagulation factor IV -RETIRED-|||C0006675|SNOMEDCT|||CA|Cocaine Anonymous|||1|CA|Cold agglutinins;cold agglutinin|C0056097|||C0056097|CHV;LNC;NCI;SNOMEDCT|1|0.0099|1CA|GA|||C2314861|GO|||CA|GCA|C0039483;C1423891;C2314861|||C2314861|GO|||

CA|GL-7-ACA acylase activity;cephalosporin C acylase activity;cephalosporin acylase activity;glutaryl-7-ACA acylase activity;glutaryl-7-aminocephalosporanic acid acylase activity;glutaryl-7-aminocephalosporanic-acid acylase activity|C2314861||C2314861|GO;MTH|||

CA|Hippocampal structure (body structure)|||C0019564|SNOMEDCT|||

CA|Hippocampus;hippocampus|C0019564;C0949582;C1029104;C1284077|||C0019564|AOD;CHV;CSP;FMA;MSH;NCI;SNOMEDCT|||

CA|Hippocampus proper|||C0019564|FMA|||

CA|MALIGNANCIES;MALIGNANCY;Malignancy;malignancies;malignancy;MALIGNANT NEOPLASM;Malignant Neoplasm;Malignant Neoplasms;Malignant neoplasm;Malignant neoplasm NOS;Malignant neoplasms;NEOPLASM MALIGNANT;Neoplasms - malignant;malignant neoplasm;malignant neoplasms;MALIGNANT TUMOR;Malignant Tumor;Malignant tumor;Malignant tumour;malignant tumor;malignant tumours;malignant tumour;malignant tumours|C0006826;C1306459|||C0006826|AIR;AOD;CHV;COSTAR;CST;LNC;MEDLINEPLUS;MTH;NCI;SNOMEDCT|||

CA|Malignant neoplasm of unspecified site;Malignant neoplasm of unspecified site NOS|||C0006826|SNOMEDCT|||

CA|Malignant neoplasm of unspecified site (disorder);Malignant neoplasm of unspecified site NOS (disorder)|||C0006826|SNOMEDCT|||

CA|Malignant neoplastic disease (disorder)|||C0006826|SNOMEDCT|||

CA|Malignant tumor (disorder);Malignant tumour (disorder)|||C0006826|SNOMEDCT|||

CA|NATO code for riot control agent bromobenzylcyanide|||1

CA|[X]Malignant neoplasm without specification of site|||C0006826|SNOMEDCT|||

CA|[X]Malignant neoplasm without specification of site (disorder)|||C0006826|SNOMEDCT|||

CA|abnormalities|C0000768;C0000769|||1|0.0019|

CA|about|||1

CA|activity|C0026606;C0205177;C0439167;C0441655;C1561536|||1|0.0049|

CA|adenocarcinoma|C0001418|||1|0.0019|

CA|alcohol|C0001962;C0001975;C0202304|||1|0.0021|

CA|anterior commissure|C0152335;C1289546|||1

CA|antigens|C0003320|||1|0.0016|

CA|arterial|C0003842;C0221464|||1|0.0016|

CA|caffeic acid|C0054433|||C0054433|CHV;MSH;NCI|1|0.0083|

CA|caffeine|C0006644|||C0006644;C0202348|AOD;CHV;CSP;LCH;LNC;MEDLINEPLUS;MSH;MTH;MTHSPL;NCI;NDFRT;PDQ;RXNORM;SNOMEDCT;VANDF|1|0.0057|

CA|calcium antagonist;calcium antagonists|C0006684|||C0006684|CHV;CSP|1|0.0047|1

CA|cancer antigen|||1|0.0056|1

CA|candle|||1

CA|caproic acid|C0062655|||C0062655|AOD;CHV;FMA;NCI;SNOMEDCT|||1

CA|capsid|C0006933;C1136102|||C0006933;C1136102|CHV;CSP;LNC;MSH;MTH;NCI|1|0.0168|1

CA|capsid protein|C1136102|||1|0.0057|

CA|carbohydrate antigen|C0443758|1|0.210|C0443758|CHV;SNOMEDCT|||1

CA|carbonate apatite;carbonated apatite|C0054675|||1|0.0018|

CA|carbonic anhydrase|C0007028|||C0007028|CHV;CSP;LCH;MSH;NDFRT;SNOMEDCT|1|0.1301|1

CA|carbonic anhydrase II|C0007034;C1413043|||1|0.001|

CA|carcinoma|C0007097|||C0007097|AOD;CHV;COSTAR;CSP;CST;DXP;MEDLINEPLUS;MSH;MTH;NCI;NDFRT;SNOMEDCT|1|0.0114|1

CA|cardiac angiography|C0002971|||1

CA|cardiac arrest|C0018790|||C0018790|AOD;CHV;COSTAR;CSP;CST;DXP;ICD9CM;LCH;MEDLINEPLUS;MSH;MTH;NCI;NDFRT;OMIM;SNOMEDCT|1|0.0201|1

CA|cardiac  
 arrhythmia|C0003811;C1560249|||C0003811;C1560249|AOD;CHV;COSTAR;MSH;MTH;NCI;NDFRT;OMIM;SNOMEDCT|||1  
 CA|cardiac-apnea|||||||1  
 CA|carotid  
 artery|C0007272;C0162859|||C0007272;C0162859|AOD;CHV;CSP;FMA;LCH;LNC;MSH;NCI;SNOMEDCT;UWDA|1|0.0137|1  
 CA|cast|C0179686;C0302143|||C0179686;C0302143;C0687709;C1366482;C1413137;C1539080;C1705948;C1825060|AOD;CHV;HUGO;NCI;OMIM;SNOMEDCT|||1  
 CA|catalase|C0007367;C1413138|||||1|0.0021|  
 CA|catecholamine|C0007412|||||1|0.0975|1  
 CA|catecholaminergic|||||1|0.0144|1  
 CA|catheter ablation|C0162563|||||1|0.0017|  
 CA|cathode|C0007441|||C0007441|CSP;MSH|||1  
 CA|celiac artery;celiac  
 axis|C0007569;C1268965|||C0007569;C1268965|CHV;FMA;LCH;LNC;MSH;MTH;SNOMEDCT;UWDA|||1  
 CA|cellular automata;cellular automaton|||||1|0.0051|  
 CA|cellulose acetate|C0050505|||C0050505|CHV;MSH;NDFRT;SNOMEDCT;VANDF|1|0.0168|1  
 CA|central apnea|C0520680|||||||1  
 CA|central nucleus of the amygdala|||||1|0.0012|  
 CA|cerebellar atrophy|C0740279|||||1|0.0023|  
 CA|cerebral  
 aqueduct|C0007769;C1284576|||C0007769;C1284576|AOD;CHV;CSP;FMA;MSH;MTH;NCI;SNOMEDCT|||1  
 CA|cerebral  
 atrophy|C0235946|||C0235946|AOD;CHV;COSTAR;CST;MTH;OMIM;SNOMEDCT|1|0.0024|1  
 CA|cerebral autoregulation|||||1|0.0052|  
 CA|chemotactic activity|||||||1  
 CA|child abuse|C0008060;C1541830|||||||1  
 CA|chloroamphetamine|C2599027|||C2599027|LNC|||  
 CA|choanal atresia|C0008297|||||1|0.0016|  
 CA|cholate|C0109497|||||1|0.0024|  
 CA|cholic acid|C0055568|||C0055568|AOD;CHV;LCH;MSH;NCI;NDFRT;SNOMEDCT|1|0.0205|1  
 CA|chorioamnionitis|C0008495|||||||1  
 CA|chronic anovulation|||||||1  
 CA|chronologic age|||||||1  
 CA|chronological age|||||1|0.026|  
 CA|circulatory arrest|C0444720|||C0444720|CHV;SNOMEDCT|||  
 CA|citric  
 acid|C0055819;C1171556|||C0055819;C1171556|CHV;MSH;MTH;MTHSPL;NCI;NDFRT;RXNORM;SNOMEDCT;VANDF|1|0.0087|1  
 CA|clavulanic  
 acid|C0055860|||C0055860|CHV;LCH;MSH;MTHSPL;NCI;NDFRT;RXNORM;SNOMEDCT|||  
 CA|clotting assay|||||||1  
 CA|cluster analysis|C0009085|||||1|0.0036|  
 CA|coagglutination|C0441689|||C0441689|CHV;SNOMEDCT|||1  
 CA|coarctation of aorta;coarctation of the  
 aorta|C0003492;C2930803|||C0003492;C2930803|CHV;COSTAR;MSH;OMIM|1|0.0017|1  
 CA|cobblestone areas|||||1|0.0009|  
 CA|cochlear aqueduct|C0009196|||||1|0.0026|  
 CA|coefficient of absorption|||||||1  
 CA|cold adapted|||||1|0.0012|  
 CA|cold-acclimated|||||1|0.0068|  
 CA|cold-acclimated rats|||||1|0.0017|  
 CA|collagen antigen|||||||1  
 CA|collagenolytic activity|||||||1

CA|colloid antigen|||||||1  
 CA|commissura anterior|C0152335|||C0152335|FMA|||  
 CA|common antigen|||||||1  
 CA|community acquired;community-acquired|C0456394|||||1|0.0026|1  
 CA|complement activation|C0009528;C2984768|||||1|0.001|  
 CA|compressed air|C0337081|||C0337081|CHV;MSH;SNOMEDCT|||1  
 CA|concentration|C0086045;C1446561|||||1|0.004|  
 CA|conception age|||||||1  
 CA|conditioned abstinence|C0683359|||||||1  
 CA|conditioned air|||||||1  
 CA|condyloma acuminata;condylomata acuminata;condyloma  
 acuminatum|C0009663|||||1|0.0068|1  
 CA|congenital anomaly|C0000768|||||||1  
 CA|congruence angle|||||1|0.001|  
 CA|conjoint analysis|||||1|0.0024|  
 CA|constitutively activated|||||1|0.001|  
 CA|constitutively active|||||1|0.0054|  
 CA|contact angle|||||1|0.0012|  
 CA|continuous aerosol|||||||1  
 CA|contrast agent|C0009924|||C0009924|CHV;NCI|1|0.0064|  
 CA|contrast arteriography|||||1|0.0026|  
 CA|controlled atmosphere|||||1|0.0014|  
 CA|conventional angiography|C0442842|||C0442842|SNOMEDCT|1|0.0029|  
 CA|conventional arteriography|||||1|0.0014|  
 CA|conversation analysis|||||1|0.0024|  
 CA|coracoacromial|||||||1  
 CA|corneal abrasion|C0010032|||||||1  
 CA|coronary  
 angiography|C0085532;C1548829|||C0085532;C1548829|AOD;CHV;HL7V2.5;MSH;MTH;SNOMED  
 CT|1|0.0121|  
 CA|coronary angioplasty|C0002997;C0190211|||||||1  
 CA|coronary arrest|||||||1  
 CA|coronary arteriography|C0085532|||||1|0.0017|  
 CA|coronary  
 artery|C0205042;C1269008|||C0205042;C1269008|CHV;CSP;FMA;MSH;MTH;NCI;SNOMEDCT;UW  
 DA|1|0.0161|1  
 CA|coronary atherosclerosis|C0010054;C2733225|||||1|0.0012|  
 CA|corpora allata;corpus allatum|C0010085|||C0010085|CSP;MSH|1|0.0221|1  
 CA|corpora  
 amylacea|C0333564;C1235668|||C0333564;C1235668|MTH;NCI;SNOMEDCT;UWDA|1|0.0043|  
 CA|corpus albicans|C0227895|||C0227895|FMA;UWDA|||1  
 CA|corpus amylaceum|||||||1  
 CA|corrected area|||||||1  
 CA|correspondence analysis|||||1|0.0029|  
 CA|cortical area|||||1|0.0033|  
 CA|cortisone  
 acetate|C0056391|||C0056391|CHV;MSH;MTHSPL;NCI;NDFRT;RXNORM;SNOMEDCT;USPMG;VANDF  
 |1|0.0057|  
 CA|cricoarytenoid|||||||1  
 CA|cricoid arch|||||||1  
 CA|croup-associated|||||||1  
 CA|croup-associated virus|C0030391|||C0030391|MSH|||  
 CA|cyclophosphamide doxorubicin (AC protocol);cyclophosphamide doxorubicin (AC)  
 protocol|||||C0050385|CHV|||  
 CA|cyproterone  
 acetate|C0056855|||C0056855|CHV;MSH;NCI;NDFRT;PDQ;RXNORM;SNOMEDCT|1|0.0186|

CA|cytosine  
arabinoside|C0010711|||C0010711|CHV;CSP;MSH;NCI;NDFRT;PDQ;SNOMEDCT|1|0.0038|1  
CA|cytotoxic antibody|C0024284|||C0024284|SNOMEDCT|||1  
CA|highly polymorphic|||1|0.0009|  
CA|hippocampus|||C0019564|CHV|||  
CA|isolated a polymorphic dinucleotide|||1|0.0012|  
CA|live attenuated cold-adapted|||1|0.0007|  
CA|measurement of compressed air|||1|0.0007|  
CA|neoplasm/cancer|||C0006826|CSP|||  
CA|plasma catecholamines|||1|0.0057|  
CA|weeks of conceptional age|||1|0.0007|  
CBC|Blood Cell Count;blood cell count|C0005771;C0009555|||C0009555|NCI|||  
CBC|Blood Count, Complete;Blood Counts, Complete;Complete Blood Count;Complete  
Blood Counts;Complete blood count;Complete blood count, NOS;Count, Complete  
Blood;Counts, Complete Blood;complete blood count;complete blood counts;FBC;FBC  
- Full blood count;Full Blood Count;Full blood count;Full blood count NOS;full  
blood count;blood test full count;full blood count  
test|C0009555|1|1|C0009555|CHV;CSP;MSH;MTH;NCI;SNOMEDCT|1|0.6597|1  
CBC|CBC;CBC,  
NOS|C0009555;C2263086|||C0009555;C2263086|CHV;CSP;GO;LNC;MTH;NCI;SNOMEDCT|||  
CBC|CBC (complete blood count)|||C0009555|CSP|||  
CBC|Camelot Behavioral Checklist|||1  
CBC|Chlorambucil|C0008163|||1|0.0471|  
CBC|Complete blood count (procedure)|||C0009555|SNOMEDCT|||  
CBC|Full blood count (procedure);Full blood count NOS  
(procedure)|||C0009555|SNOMEDCT|||  
CBC|Nuclear cap binding complex location;nuclear cap binding complex  
location;nuclear cap binding complex;nuclear cap-binding  
complex|C2263086|||C2263086|GO;MTH|1|0.0576|  
CBC|binding capacity|C0439155|||1|0.0576|  
CBC|cannabichromene|C0054589|||1|0.0628|  
CBC|cerebral-buccal connective|||1|0.0314|  
CBC|cerebrobuccal connective|||1  
CBC|child behavior characteristics|||1  
CBC|complete blood count test (CBC)|||C0009555|CHV|||  
CBC|contralateral breast cancer|C1096616|||1|0.0838|  
CD4|ANTIGENS CD 004;CD 004 ANTIGENS|||C0003323|MSH|||  
CD4|Antigen, CD4;Antigens, CD4;CD4 ANTIGEN;CD4 Antigen;CD4 Antigens;CD4  
antigen;CD4 Molecule;CD4  
molecule|C0003323;C1332714|||C0003323;C1332714|CHV;CSP;HUGO;LNC;MSH;MTH;NCI;NDFR  
T;OMIM|||  
CD4|Antigens, CD4 [Chemical/Ingredient]|||C0003323|NDFRT|||  
CD4|Antigens, T-Cell T4;T-Cell T4 Antigens;T4 Antigens, T Cell;T4 Antigens, T-  
Cell;CD4 - Cluster of differentiation antigen 4;CD4 Ag;CD4 Protein;CD4 Receptor,  
Surface;CD4 Receptors, Surface;Receptors, Surface CD4;Surface CD4  
Receptor;Surface CD4 Receptors;CD4 Receptors;Receptors, CD4;cd4 receptor;cd4  
receptors;Cluster of differentiation antigen 4;Leucocyte 3a;Leukocyte  
3a;Lymphocyte antigen CD4;OKT4 - Ortho Kung T4;OKT4 Antigen;OKT4 antigen;Ortho  
Kung T4;T-cell lineage 4;T-helper cell marker;T4 - T-cell lineage 4;T4  
molecule;helper T lymphocyte  
marker|C0003323|||C0003323|CHV;CSP;LNC;MSH;NCI;NDFRT;SNOMEDCT|||  
CD4|CD 004 MOLECULE|||C0003323|MSH|||  
CD4|CD 004 RECEPTORS;RECEPTORS CD 004|||C0003323|MSH|||  
CD4|CD4;cd4|||C0003323;C1332714;C2698595|CHV;HUGO;LNC;NCI;OMIM|||  
CD4|CD4 Antigen (P55)|||C0003323|NCI|||  
CD4|CD4 Antigen (P55) Gene|||C1332714|NCI|||  
CD4|CD4 Expressing T Cell Count|C2698595|||C2698595|MTH;NCI|||

CD4|CD4 Gene;CD4 gene|C1332714|||C1332714|HUGO;MTH;NCI|||  
 CD4|CD4 RECEPT;RECEPT CD4|||C0003323|MSH|||  
 CD4|Lymphocyte antigen CD4 (substance)|||C0003323|SNOMEDCT|||  
 CD4|RECEPT SURFACE CD4;SURFACE CD4 RECEPT|||C0003323|MSH|||  
 CD4|T AAB ANTIGENS T CELL 04|||C0003323|MSH|||  
 CD4|T helper cells|C0018894|||1|0.2143|  
 CD4|T helper/inducer|||1|0.0893|  
 CD4|T-CELL ANTIGEN T4/LEU3;T-Cell Antigen  
 T4/Leu3|||C0003323;C1332714|NCI;OMIM|||  
 CD4|T-Cell Surface Antigen T4/Leu-3|||C0003323|NCI|||  
 CD4|anti-L3T4|||1|0.4107|  
 CD4|cluster of differentiation 4||1|1.000|||1|  
 CD4|receptor|C0597357|||1|0.2857|  
 CDI|1,1'-carbonyldiimidazole|||1|0.0505|  
 CDI|CD-I;CDI|C0282601;C1151574|||C0282601|MSH;NCI|||  
 CDI|CDI (Compact Disc-Interactive)|||C0282601|NCI|||  
 CDI|Ca(2+)-dependent inactivation|||1|0.0189|  
 CDI|Children's Depression Inventory||1|0.540||1|0.3249|1|  
 CDI|Color Doppler imaging;color Doppler imaging|||1|0.3565|1|  
 CDI|Compact Disc-Interactive;Compact Disk Interactive;Compact Disk,  
 Interactive;Compact Disks, Interactive;Disk, Interactive Compact;Disks,  
 Interactive Compact;Interactive Compact Disk;Interactive Compact  
 Disks;Interactive CD|C0282601|||C0282601|MSH;MTH;NCI|||  
 CDI|Cotrel-Dubousset instrumentation|||1|0.0946|1|  
 CDI|cell-directed inhibitor|||1|  
 CDI|center for diagnostic imaging||1|0.450|||1|  
 CDI|central diabetes insipidus;cranial diabetes insipidus|C0687720|||1|0.142|1|  
 CDI|chronic diabetes insipidus|||1|  
 CDI|clam digger's itch|C0546996|||1|  
 CDI|clean, dry, intact||1|0.006|||1|  
 CDI|communicative development inventory|||1|  
 CDI|controlled diabetes insipidus|||1|  
 CDI|cyclin-dependent kinase inhibitor|C0919418;C1152568;C1511576|||1|0.0126|  
 CEA|ANTIGENS CD 066E|||C0007082|MSH|||  
 CEA|Antigen, CD66e;Antigens, CD66e;CD66e Antigen;CD66e Antigens;Antigen,  
 Carcinoembryonic;CARCINOEMBRYONIC ANTIGEN;Carcinoembryonic  
 Antigen;Carcinoembryonic antigen;Carcinoembryonic antigens;carcinoembryonic  
 antigen;CD66e Ag;CEA - Carcinoembryonic antigen;CEA Family  
 Protein;Carcinoembryonic Ag;carcinoembryonic Ag;Carcinoembryonic Antigen Family  
 Protein;Lymphocyte antigen CD66E;Meconium Antigen 100;carcinoembryonal  
 antigen|C0007082|1|0.888|C0007082;C0201933;C1332744|CHV;CSP;LCH;LNC;MSH;MTH;NCI;  
 NDFRT;OMIM;SNOMEDCT|1|0.7948|1|  
 CEA|CARCINOEMBRYONIC ANTIGEN-RELATED CELL ADHESION MOLECULE 5;Carcinoembryonic  
 Antigen-Related Cell Adhesion Molecule 5;carcinoembryonic antigen-related cell  
 adhesion molecule 5|C0007082;C1332744|||C0007082;C1332744|HUGO;NCI;OMIM|||  
 CEA|CD 066 E ANTIGEN|||C0007082|MSH|||  
 CEA|CD66e|||C0007082;C1332744;C1706545|HUGO;LNC;NCI|||  
 CEA|CEA;CEA measurement;Carcinoembryonic Antigen Measurement;Carcinoembryonic  
 antigen measurement;carcinoembryonic antigen  
 test|C0201933|||C0007082;C0201933;C1332744;C1332745;C1418994;C1706545|CHV;CSP;HU  
 GO;MSH;MTH;NCI;OMIM;SNOMEDCT|||  
 CEA|CEACAM5|||C0007082;C1332744;C1706545|HUGO;NCI;OMIM|||  
 CEA|CEACAM5 Gene;CEACAM5 gene;Carcinoembryonic Antigen-Related Cell Adhesion  
 Molecule 5 Gene|C1332744|||C1332744|HUGO;MTH;NCI|||  
 CEA|CEACAM5 wt Allele;Carcinoembryonic Antigen-Related Cell Adhesion Molecule 5  
 wt Allele|C1706545|||C1706545|MTH;NCI|||

CEA|CEACAM7;carcinoembryonic antigen-related cell adhesion molecule  
7|C1332745;C1332746|||C1332745|HUGO;NCI|||  
CEA|CEACAM7 Gene;CEACAM7 gene;Carcinoembryonic Antigen-Related Cell Adhesion  
Molecule 7 Gene|C1332745|||C1332745|HUGO;MTH;NCI|||  
CEA|Carcinoembryonic Antigen CGM2|C0007082;C1332746|||C0007082|NCI|||  
CEA|Carcinoembryonic Antigen [Chemical/Ingredient]|||C0007082|NDFRT|||  
CEA|Carcinoembryonic antigen (substance)|||C0007082|SNOMEDCT|||  
CEA|Carcinoembryonic antigen level;Carcinoembryonic antigen: (&  
level)|||C0201933|SNOMEDCT|||  
CEA|Carcinoembryonic antigen measurement (procedure)|||C0201933|SNOMEDCT|||  
CEA|Carcinoembryonic antigen: (& level) (procedure)|||C0201933|SNOMEDCT|||  
CEA|Cost-effectiveness analysis;cost-effectiveness  
analysis|C1511536|||1|0.0184|1  
CEA|Lymphocyte antigen CD66E (substance)|||C0007082|SNOMEDCT|||  
CEA|PREGNANCY-SPECIFIC BETA-1-GLYCOPROTEIN 2;pregnancy specific beta-1-  
glycoprotein 2;PSBG2;PSG2;PSG2 gene;PSGGB;carcinoembryonic antigen  
SG8|C1418994|||C1418994|HUGO;MTH;OMIM|||  
CEA|PSG1|C1418991;C1418994|||C1418994|HUGO|||  
CEA|carcinoembryonic|C1440204|||1|0.0018|  
CEA|carcinoembryonic antigen gene family member  
2|C1332745;C1332746;C1706153|||C1332745|HUGO|||  
CEA|carotid  
endarterectomy|C0014099|1|0.106|C0014099|CHV;COSTAR;MEDLINEPLUS;MSH;MTH;SNOMEDCT  
|1|0.1416|1  
CEA|central amygdala|||1|0.0064|  
CEA|central amygdaloid nucleus|C0175219|||1|0.0031|  
CEA|central nucleus of the amygdala|||1|0.0261|  
CEA|cervical epidural abscess|C1997613|||C1997613|SNOMEDCT|||  
CEA|cholesterol-esterifying activity|||1  
CEA|continuous epidural analgesia|||1|0.0015|  
CEA|cost-effectiveness analyses|||1|0.0013|  
CEA|cranial epidural abscess|C0238075|||1  
CEA|crystalline egg albumin|||1  
CEA|cultured epidermal autograft|||1|0.0015|  
CEA|cultured epithelial autograft;cultured epithelial autografts|||1|0.0024|1  
CEA|enzyme activity|C0243102|||1|0.0011|  
CEA|pregnancy-specific beta-1  
glycoprotein|C0033002;C1418994;C1418997|||C1418994|HUGO|||  
CEA|pregnancy-specific beta-1-glycoprotein  
7|C0640646;C1418994;C1418999|||C1418994|HUGO|||  
CF|5(6)-carboxyfluorescein|||1|0.003|  
CF|6-carboxyfluorescein|C0049522|||1|0.0016|  
CF|CAF|||C0007673|NCI|||  
CF|CDDP/5-FU|||C0280055|NCI;PDQ|||  
CF|CENTRAL AFRICAN REPUBLIC;Central African Republic;Ubangi-  
Shari|C0007673|||C0007673|AOD;LCH;MSH;MTH;NCI;SNOMEDCT|||  
CF|CF;cf|||C0007673;C0007807;C0009738;C0010674;C0055160;C0280055;C0731033;C1883  
561|CHV;MEDLINEPLUS;MSH;NCI;OMIM;PDQ;SNOMEDCT|||  
CF|CF - Cystic fibrosis;cystic fibrosis (CF);CYSTIC FIBROSIS;Cystic  
Fibrosis;Cystic fibrosis;Cystic fibrosis NOS;Fibrosis, Cystic;cystic  
fibrosis;Cystic fibrosis (disorder);Cystic fibrosis NOS (disorder);cystic  
disorder  
fibrosis;MUCOVISCIDOSIS;Mucoviscidosis;mucoviscidosis|C0010674|1|0.998|C0010674|  
AOD;CCS;CHV;COSTAR;CSP;CST;DXP;ICD9CM;LCH;LNC;MEDLINEPLUS;MSH;MTH;MTHICD9;NCI;ND  
FRT;OMIM;SNOMEDCT|1|0.727|1

CF|CF protocol;cf  
protocol;Cyclophosphamide/Fluorouracil;cyclophosphamide/fluorouracil;fluorouraci  
l cyclophosphamide|C0055160||C0055160|CHV;MSH;MTH;NCI;PDQ|||  
CF|CFR|C0731033;C1305363;C1515366||C0731033|PDQ|||  
CF|CG|||C0009738|NCI|||  
CF|COG|||C0009738|NCI|||  
CF|CONGO;Congo;congo;Republic of the  
Congo|C0009738||C0009738|AOD;CHV;MSH;MTH;NCI;SNOMEDCT|||  
CF|CSF|||C0007807|MSH|||  
CF|CT|||C0007673|NCI|||  
CF|CTX/5-FU|||C0055160|NCI;PDQ|||  
CF|Calcium (6S)-Folate|||C0731033|NCI;PDQ|||  
CF|Calcium Folate;Calcium folinate;Folate Calcium;Folate, Calcium;calcium  
folinate;folinate calcium;Calcium Leucovorin;Calcium leucovorin;LEUCOVORIN  
CALCIUM;Leucovorin Calcium;Leucovorin calcium;Leucovorin, Calcium;calcium  
leucovorin;leucovorin calcium;Calcium leucovorin preparation;Leucovorin calcium  
preparation;Citrovorum factor preparation;Folinic Acid Calcium Salt  
Pentahydrate;L-CF;Levofolate  
calcium|C0731033||C0731033|CHV;MSH;MTH;MTHSPL;NCI;NDFRT;PDQ;RXNORM;SNOMEDCT;USP  
MG;VANDF|||  
CF|Calcium leucovorin (substance)|||C0731033|SNOMEDCT|||  
CF|Calcium leucovorin preparation (product)|||C0731033|SNOMEDCT|||  
CF|Calcium leucovorin preparation (substance)|||C0731033|SNOMEDCT|||  
CF|Canadian Forces|||1|0.002|  
CF|Cascade filtration;cascade filtration|||1|0.0014|1  
CF|Central African Republic (geographic location)|||C0007673|SNOMEDCT|||  
CF|Christmas factor|C0015491|||1  
CF|Cisplatin/Fluorouracil;cisplatin/fluorouracil|||C0280055|NCI;PDQ|||  
CF|Citrovorum Factor;Citrovorum factor;Factor, Citrovorum;citrovorum  
factor|C0023413;C0731033||C0023413;C0731033|CHV;MSH;NCI;NDFRT;PDQ;SNOMEDCT|||1  
CF|Citrovorum Factor [Chemical/Ingredient]|||C0731033|NDFRT|||  
CF|Clastogenic factors|||1|0.0011|  
CF|Concentration factors|||1|0.0011|  
CF|Congo (Brazzaville)|||C0009738|MSH|||  
CF|Congo (geographic location)|||C0009738|SNOMEDCT|||  
CF|Crevicular fluid|||1|0.0026|  
CF|Crude fiber;crude fibre|C2348013|||1|0.0036|  
CF|Cystic Fibrosis [Disease/Finding]|||C0010674|NDFRT|||  
CF|Cystic fibrosis (disorder) [Ambiguous]|||C0010674|SNOMEDCT|||  
CF|Fibrocystic disease;disease fibrocystic;diseases fibrocystic;fibrocystic  
disease|C0010674;C0016033;C0016034||C0010674|CHV;SNOMEDCT|||  
CF|In Cerebrospinal Fluid;cerebrospinal  
fluid|C0007806;C0007807||C0007807|MSH;MTH|||  
CF|LV|C0023128;C0731033;C1881413||C0731033|PDQ|||  
CF|P-FU;cisplatin/fluorouracil protocol|C0280055||C0280055|MTH;NCI;PDQ|||  
CF|With Food|C1883561||C1883561|MTH;NCI|||  
CF|caffeine|C0006644|||1|0.003|  
CF|calcaneal fibular|||1  
CF|calf blood flow|||1  
CF|calibration factor|C2347552||C2347552|NCI|||1  
CF|californium|C0006758|||1  
CF|cancer free|||1  
CF|carbolfuchsin;carbolfuchsin|C0054697||C0054697|MSH;SNOMEDCT|||1  
CF|carboxyfluorescein|C0108453|||1|0.0171|  
CF|cardiac  
failure|C0018801;C0018802||C0018801;C0018802|CHV;CST;MEDLINEPLUS;MSH;NDFRT;OMIM  
;SNOMEDCT|1|0.0028|1

CF|carotid foramen|||||||1  
CF|carrier-free|||||||1  
CF|case fatality|||||1|0.0013|  
CF|case file|||||||1  
CF|cationic ferritin|||||1|0.0038|  
CF|cationized ferritin|C0071525|||||1|0.0171|  
CF|cell-free|C1183428|||||1|0.0012|  
CF|central field|||||||1  
CF|central fossa|||||||1  
CF|centrifugal force|C0563531|||C0563531|SNOMEDCT|||1  
CF|characteristic frequency|||||||1|0.0364|1  
CF|charcoal-filtered air|||||||1|0.0017|  
CF|chemotactic factor|C0008013|||C0008013|CSP|||1  
CF|chest and left leg|||||||1  
CF|chick fibroblast|||||||1  
CF|chicken fat|||||1|0.0009|  
CF|chloroform|C0008238|||||1|0.0043|  
CF|choroid fissure|C0262212|||||||1  
CF|chronic fatigue|C0518656|||||1|0.0026|  
CF|chronicity factor|||||||1  
CF|ciprofloxacin|C0008809|||||1|0.0018|  
CF|circumflex|C1880089|||||||1  
CF|clavicular fracture|C0159658|||||||1  
CF|climbing fiber;climbing fibre|C2752551|||||1|0.0092|1  
CF|clofibrate|C0009002|||||1|0.0024|  
CF|clotting factor|C0005789|||C0005789|CHV;CSP;NCI|||1  
CF|clubfoot|C0009081;C0158489|||||||1  
CF|coelomic fluid|||||||1|0.0014|  
CF|colicin factor|C1257900|||C1257900|MSH;SNOMEDCT|||1  
CF|collected fluid|||||||1  
CF|colonization factor|||||||1  
CF|colony formation|||||1|0.0008|  
CF|colony-forming|||||||1  
CF|color and form|||||||1  
CF|colostrum-fed|||||1|0.0013|  
CF|common femoral|||||||1  
CF|compare|C1707455|||||||1  
CF|complement factor|C0920104;C1305959|||||||1  
CF|complement  
fixation|C0301911;C1551400|||C0301911;C1551400|CHV;HL7V3.0;SNOMEDCT|1|0.068|1  
CF|complement fixation test|C0009541|||||1|0.0034|  
CF|complement fixing;complement-fixing|||||1|0.0181|1  
CF|complementary feeding|C0038847|||||||1  
CF|completely follicular|||||||1  
CF|complex fixation|||||||1  
CF|computed fluoroscopy|||||||1  
CF|constant frequency;constant-frequency|||||||1|0.0017|1  
CF|continuous-flow|||||1|0.0022|  
CF|contractile force|||||1|0.0053|1  
CF|conventional fractionation|||||1|0.0029|  
CF|coronary flow|||||1|0.0273|1  
CF|correction factor|||||||1  
CF|cortical fibroblasts|||||1|0.0013|  
CF|cough fracture|C0567413|||||||1  
CF|cough frequency|||||||1  
CF|count fingers;counting fingers|||||||1|0.0007|1  
CF|coupling factor|||||||1

CF|culture filtrate|||||1|0.0062|  
CF|cyclin fibroblast|||||1|  
CF|cystic fibrosi||||C0010674|CHV|||  
CF|cystic fibrosis pancreas;pancreas cystic fibrosis;disease fibrocystic  
pancreas;fibrocystic disease of pancreas|C0010674;C1527396|||C0010674|CHV|||  
CF|cystic fibrosys||||C0010674|CHV|||  
CF|cystics fibrosis||||C0010674|CHV|||  
CF|cytosolic fraction|||||1|0.0008|  
CF|cytotoxic factor|||||1|0.0055|  
CF|folinic acid;leucovorin|C0023413|||||1|0.0025|  
CF|function|C0031843;C0542341;C0700205;C1705273|||||1|0.0018|  
CF|mucoviscidose||||C0010674|CHV|||  
CF|mucoviscidosi||||C0010674|CHV|||  
CF|mucoviscidosys||||C0010674|CHV|||  
CHF|CARDIAC FAILURE CONGESTIVE;Cardiac Failure Congestive;Congestive cardiac  
failure;cardiac congestive failure;cardiac failure congestive;congestive cardiac  
failure;CCF - Congestive cardiac failure;CHF;CHF NOS;CHF - Congestive heart  
failure;congestive heart failure (CHF);congestive heart failure chf;CONGESTIVE  
HEART FAILURE;Congestive Heart Failure;Congestive heart failure;FAILURE HEART  
CONGESTIVE;FAILURE, CONGESTIVE HEART;HEART FAILURE, CONGESTIVE;Heart Failure,  
Congestive;congestive failure heart;congestive failure hearts;congestive  
failures heart;congestive heart failure;failure congestive heart;heart  
congestive failure;heart failure congestive;Congestive heart disease;congestive  
disease heart;congestive diseases heart;congestive heart disease;disease  
congestive heart;Congestive heart failure,  
unspecified|C0018802|1|1|C0018802|AIR;AOD;CCS;CHV;COSTAR;CSP;CST;DXP;ICD9CM;LCH;  
LNC;MEDLINEPLUS;MSH;MTH;MTHICD9;NCI;OMIM;PDQ;SNOMEDCT|1|0.891|1  
CHF|Cardiac Failure;Heart Failure|C0018801;C0018802|||C0018802|NDFRT|||  
CHF|Congenital hepatic fibrosis;congenital hepatic  
fibrosis|C0009714|||||1|0.0071|1  
CHF|Congestive cardiac fail||||C0018802|SNOMEDCT|||  
CHF|Congestive heart failure (disorder)|||C0018802|SNOMEDCT|||  
CHF|Congetive cardiac failure||||C0018802|SNOMEDCT|||  
CHF|Crimean Haemorrhagic Fever;Crimean hemorrhagic fever|C0019099|||||1|0.0035|1  
CHF|Heart Failure [Disease/Finding]||||C0018802|NDFRT|||  
CHF|ccf|C0009081;C0018802|||C0018802|CHV|||  
CHF|chick embryo fibroblast|||||1|  
CHF|chronic heart failure|C0264716|||||1|  
CHF|continuous hemofiltration|C0472683|||||1|0.006|  
CHF|patients with chronic heart failure|||||1|0.0925|  
CHOP|ACOP;VCAP|C0055598;C0163868|||C0055598;C0163868|NCI;PDQ|||  
CHOP|C EBP Homologous Protein;C-EBP Homologous Protein;C/EBP homologous  
protein;C/EBP-HOMOLOGOUS PROTEIN;C/EBP-Homologous Protein;Homologous Protein, C-  
EBP|C0287750;C1413947|||C0287750;C1413947|MSH;NCI;NDFRT;OMIM|1|0.3673|  
CHOP|C/EBP Zeta Gene;DDIT3 wt Allele;DNA-Damage-Inducible Transcript 3 wt  
Allele;MGC4154|C2985165|||C2985165|MTH;NCI|||  
CHOP|C/EBP zeta;DDIT3;DDIT3 Gene;DDIT3 gene;DNA DAMAGE-INDUCIBLE TRANSCRIPT  
3;DNA-damage-inducible transcript 3;DNA-Damage-Inducible Transcript 3  
Gene|C1413947|||C1413947|HUGO;LNC;MTH;NCI;OMIM|||  
CHOP|C/EBP-Homologous Protein 10;CHOP, Transcription Factor;Transcription Factor  
CHOP;DDIT-3;DDIT3 Protein;DNA Damage Inducible Transcript 3 Protein;DNA Damage-  
Inducible Transcript 3 Protein;GADD153  
Protein|C0287750|||C0287750|MSH;MTH;NCI;NDFRT|||  
CHOP|CAVP|C0055598;C0108844;C0163868|||C0055598;C0163868|NCI;PDQ|||  
CHOP|CEBPZ|C1428360;C2985165|||C2985165|NCI|||  
CHOP|CHOP;chop;chopping;chops|C0163868;C0287750;C2945739;C2985165|||C0055598;C01  
63868;C0287750;C1413947;C2945739;C2985165|CHV;HUGO;NCI;OMIM;PDQ|||

CHOP|CHOP Regimen;CHOP regimen;Cyclophosphamide-Hydroxydaunorubicin-Oncovin-Prednisone Regimen;VACP|C0163868|||C0055598;C0163868|MSH;MTH;NCI;PDQ|||  
CHOP|CHOP chemotherapy protocol;CHOP protocol;CHOP protocol-cyclophosphamide/doxorubicin/prednisone/vincristine|C0055598|||C0055598|CHV;MSH;MTH|||  
CHOP|CHOP-10|C0287750;C2985165|||C0287750;C2985165|NCI|||  
CHOP|CHOP10;GADD153|C1413947;C2985165|||C1413947;C2985165|HUGO;NCI;OMIM|||  
CHOP|COPA|C0055598;C0163868;C1413605|||C0055598;C0163868|NCI;PDQ|||  
CHOP|CTX/DOX/PRED/VCR|||C0055598;C0163868|NCI;PDQ|||  
CHOP|Chop (action)|C2945739|||C2945739|MTH|||  
CHOP|Cyclophosphamide/Doxorubicin/Prednisone/Vincristine;cyclophosphamide/doxorubicin/prednisone/vincristine;cyclophosphamide/doxorubicin/vincristine/prednisone|||C0055598;C0163868|NCI;PDQ|1|0.2245|  
CHOP|GROWTH ARREST- AND DNA DAMAGE-INDUCIBLE GENE GADD153|||C1413947|OMIM|||  
CHOP|Growth Arrest And DNA Damage Inducible Protein 153;Growth Arrest And DNA Damage-Inducible Protein 153|||C0287750|MSH;NDFRT|||  
CHOP|Growth Arrest and DNA Damage-Inducible Protein GADD153|||C0287750|NCI|||  
CHOP|Growth Arrest- and DNA Damage-Inducible Gene|||C2985165|NCI|||  
CHOP|Transcription Factor CHOP [Chemical/Ingredient]|||C0287750|NDFRT|||  
CHOP|cyclophosphamide, doxorubicin (hydroxydaunorubicin), vincristine (oncovin), prednisone||1|1.000|||  
CHOP|cyclophosphamide, doxorubicin, prednisone, and vincristine protocol|||C0055598|CHV|||  
CHOP|phosphorylcholine|C0031716|||1|0.4082|  
CIC|CAPICUA, DROSOPHILA, HOMOLOG OF;capicua homolog (Drosophila)|||C1422489|HUGO;OMIM|||  
CIC|CHVP;CHVP protocol;cyclophosphamide/doxorubicin/prednisone/teniposide protocol|C0055670|||C0055670|MSH;MTH;NCI;PDQ|||  
CIC|CIC;CICS;cic;cics|C0055670;C1422489;C1621392|||C0055670;C1422489|CHV;HUGO;OMIM;PDQ|||  
CIC|CIC gene;KIAA0306|C1422489|||C1422489|HUGO;MTH;OMIM|||  
CIC|CTX/DOX/PRED/VM-26|||C0055670|NCI;PDQ|||  
CIC|Cyclophosphamide/Doxorubicin/Prednisone/Teniposide;cyclophosphamide/doxorubicin/prednisone/teniposide|||C0055670|NCI;PDQ|||  
CIC|carbachol inhalation challenge|||1|  
CIC|cardiac intensive care unit/CICU||1|1.000|||  
CIC|cardioinhibitor center|||1|  
CIC|central nucleus of the inferior colliculus|||1|0.0072|  
CIC|chronic inactive cirrhosis|||1|  
CIC|cicletanine|C0056686|||1|0.0134|  
CIC|circulating immune complex;circulating immune complexes|C0003313|||C0003313|OMIM|1|0.816|1  
CIC|clean intermittent catheterisation;clean intermittent catheterization|||1|0.1193|1  
CIC|clean intermittent self-catheterization|||1|0.0072|  
CIC|completely in the canal|||1|  
CIC|complex instability of carpus|||1|  
CIC|conjunctival impression cytology|||1|0.037|  
CIC|constant initial concentration|||1|  
CIC|crisis intervention center|||1|  
CK|ATP Choline Transphosphatase;Choline Transphosphatase, ATP;Transphosphatase, ATP Choline;CHETK-Alpha;CHK Protein;Choline Kinase;Choline kinase;Kinase, Choline;choline kinase;Choline Phosphokinase;Phosphokinase, Choline|C0008415|||C0008415|MSH;MTH;NCI;NDFRT;SNOMEDCT|||1  
CK|ATP:choline phosphotransferase|||C0008415|MSH;NDFRT|||  
CK|BB-CK;CK-BB|C0010289;C1150462|||C1150462|GO|||  
CK|CC|||C0009212|NCI|||

CK|CCK||||C0009212|NCI|||  
CK|CHETK-Alpha Gene;CHKA wt Allele;Choline Kinase Alpha wt Allele;Choline Kinase Gene|C1706600|||C1706600|MTH;NCI|||  
CK|CHK||||C0008415;C1706600|NCI|||  
CK|CHOK|C0008415;C1706600|||C0008415;C1706600|NCI|||  
CK|CK;Centesimal Korsakovian Series of Attenuation;HOMEOPATHIC POTENCY OF CENTESIMAL KORSAKOVIAN SERIES;{kp\_C}|C2985360|||C0008415;C0009212;C0009956;C0201973;C1150462;C1706600;C2985360|GO;MTH;NCI|||  
CK|CK - Creatine kinase level;Creatine kinase level|C0750863|||C0201973|SNOMEDCT|||  
CK|CK measurement;CPK measurement;Creatine Kinase Measurement;Creatine kinase measurement;Creatine phosphokinase measurement|C0201973|||C0201973|MTH;NCI;SNOMEDCT|||  
CK|CK-MB;MB-CK|C0010290;C1150462|||C1150462|GO|||  
CK|CK-MM;MM-CK|C0010291;C1150462|||C1150462|GO|||  
CK|CKI||||C0008415;C1706600|NCI|||  
CK|CKI, Yeast, Human Complement of||||C0008415|NCI|||  
CK|CKMiMi;Mi-CK;creatine kinase activity|C1150462|||C1150462|GO;MTH|1|0.0105|  
CK|COCOS (KEELING) ISLANDS;Cocos (Keeling) Islands||||C0009212|MTH;NCI|||  
CK|COK;COOK ISLANDS;Cook Islands;cook island;cook islands|C0009956|||C0009956|CHV;MSH;MTH;NCI|||  
CK|CW||||C0009956|NCI|||  
CK|Choline Kinase [Chemical/Ingredient]||||C0008415|NDFRT|||  
CK|Choline kinase (substance)||||C0008415|SNOMEDCT|||  
CK|Conductive keratoplasty;conductive keratoplasty|C1301494|||1|0.0054|1  
CK|Creatine (phospho)kinase (& level)||||C0201973|SNOMEDCT|||  
CK|Creatine (phospho)kinase (& level) (procedure)||||C0201973|SNOMEDCT|||  
CK|Creatine Kinase;creatine kinase;creatinkinase;creatine phosphokinase|C0010287|1|0.998|C0010287;C0201973|AOD;CHV;CSP;LCH;LNC;MSH;MTH;NCI;NDFRT;SNOMEDCT|1|0.808|1  
CK|Creatine kinase measurement (procedure)||||C0201973|SNOMEDCT|||  
CK|EC 2.7.1.32||||C0008415|NCI|||  
CK|NATO code for cyanogen chloride|||||||1  
CK|Serum creatine-kinase|||||1|0.003|  
CK|anti-cytokeratin||||||1|0.0033|  
CK|calf kidney|||||||1  
CK|casein kinases|C0054846|||1|0.0018|  
CK|check;checked|C1283174;C1555524|||||||1  
CK|chick kidney||||||1|0.0033|  
CK|chicken kidney||||||1|0.0033|1  
CK|cholecystokinin|C0008328;C0523565;C1413167|||C0008328;C0523565;C1413167|AOD;C  
HV;CSP;FMA;HUGO;LCH;LNC;MSH;MTH;NCI;NDFRT;OMIM;RXNORM;SNOMEDCT|||1  
CK|color kinesis||||||1|0.0042|1  
CK|compound K|C0675992||||||1|0.0015|  
CK|contralateral knee|||||||1  
CK|creatine kinase (CK) level test||||C0201973|CHV|||  
CK|cyanogen chloride|C0056659|||||||1  
CK|cytokeratin|C0010803;C0022564||||||1|0.1517|1  
CK|cytokinin|C0010815|||C0010815|CHV;CSP|||  
CK|expression of cytokeratins||||||1|0.0042|  
CLL|B Cell CLL;B-Cell CLL;B-cell CLL;CLL, B-cell;b-cell cll;B Cell Leukemia, Chronic;B-Cell Leukemia, Chronic;B-Cell Leukemias, Chronic;Chronic B-Cell Leukemia;Chronic B-Cell Leukemias;Leukemia, B Cell, Chronic;Leukemia, B-Cell, Chronic;Leukemia, Chronic B-Cell;Leukemias, Chronic B-Cell;B Lymphocytic Leukemia, Chronic;B-Lymphocytic Leukemia, Chronic;B-Lymphocytic Leukemias, Chronic;Chronic B-Lymphocytic Leukemia;Chronic B-Lymphocytic

Leukemias;LYMPHOCYTIC LEUKEMIA CHRONIC B;Leukemia, Chronic B-  
Lymphocytic;Leukemias, Chronic B-Lymphocytic;b chronic lymphocytic leukemia;B-  
CLL - B-cell chronic lymphocytic leukaemia;B-CLL - B-cell chronic lymphocytic  
leukemia;B-Cell Chronic Lymphogenous Leukemia;B-Cell Chronic Lymphoid  
Leukemia;CHRONIC LYMPHOCYTIC LEUKEMIA;Chronic Lymphocytic Leukemia;Chronic  
Lymphocytic Leukemias;Chronic lymphocytic leukaemia;Chronic lymphocytic  
leukemia;LEUKEMIA CHRONIC LYMPHOCYTIC;LEUKEMIA LYMPHOCYTIC CHRONIC;LEUKEMIA,  
CHRONIC LYMPHOCYTIC;LEUKEMIA, LYMPHOCYTIC, CHRONIC;Leukemia, Chronic  
Lymphocytic;Leukemia, Lymphocytic, Chronic;Leukemias, Chronic  
Lymphocytic;Lymphocytic Leukemia, Chronic;Lymphocytic Leukemias, Chronic;chronic  
leukemia lymphocytic;chronic lymphocytic leukaemia;chronic lymphocytic  
leukemia;leukemia chronic lymphocytic;leukemia, chronic lymphocytic;lymphocytic  
leukemia chronic;lymphocytic leukemia, chronic;CLL;c11;c11s;CLL - Chronic  
lymphocytic leukaemia;CLL - Chronic lymphocytic leukemia;Leukemia, chronic  
lymphocytic (CLL);chronic lymphocytic leukemia (c11);c11 chronic lymphocytic  
leukemia;CLL Lymphoplasmacytoid Lymphoma;CLL Lymphoplasmacytoid  
Lymphomas;Lymphoma, CLL Lymphoplasmacytoid;Lymphoma, Lymphoplasmacytoid,  
CLL;Lymphomas, CLL Lymphoplasmacytoid;Lymphoplasmacytoid Lymphoma,  
CLL;Lymphoplasmacytoid Lymphomas, CLL;Chronic Lymphatic Leukemia;Chronic  
lymphatic leukaemia;Chronic lymphatic leukemia;LEUKEMIA, CHRONIC  
LYMPHATIC;chronic lymphatic leukaemia;chronic lymphatic leukemia;Chronic  
Lymphoblastic Leukemia;Chronic Lymphoblastic Leukemias;Leukemia, Chronic  
Lymphoblastic;Leukemia, Lymphoblastic, Chronic;Leukemias, Chronic  
Lymphoblastic;Lymphoblastic Leukemia, Chronic;Lymphoblastic Leukemias,  
Chronic;chronic lymphoblastic leukemia;Chronic Lymphogenous Leukemia;chronic  
lymphogenous leukemia;Chronic lymphocytic leukaemia, B-cell type;Chronic  
lymphocytic leukemia, B-cell type;Chronic lymphoid leukaemia;Chronic lymphoid  
leukemia;Lymphoid leukemia, chronic;chronic lymphoid leukemia;Chronic lymphoid  
leukaemia, disease;Chronic lymphoid leukemia, disease;Lymphoma, Small  
Lymphocytic,  
Plasmacytoid|C0023434|1|1|C0023434|CHV;COSTAR;CSP;CST;DXP;ICD9CM;LNC;MEDLINEPLUS  
;MSH;MTH;NCI;NDFRT;OMIM;PDQ;QMR;SNOMEDCT|1|0.9896|1  
CLL|B Cell Chronic Lymphocytic Leukemia;B cell chronic lymphocytic leukemia;B-  
Cell Chronic Lymphocytic Leukemia;B-cell chronic lymphocytic leukaemia;B-cell  
chronic lymphocytic leukemia;Chronic B-Cell Lymphocytic Leukemia;Leukemia,  
Lymphocytic, Chronic, B Cell;Leukemia, Lymphocytic, Chronic, B-Cell;Lymphocytic  
Leukemia, Chronic, B Cell;Lymphocytic Leukemia, Chronic, B-Cell;chronic  
lymphocytic leukemia, B-cell;leukemia, B-cell chronic lymphocytic;lymphocytic  
leukemia, B-cell  
chronic;BCLL|C0023434;C1868683|||C0023434|MSH;NCI;NDFRT;PDQ;SNOMEDCT|||  
CLL|B Cell Lymphocytic Leukemia;B-Cell Lymphocytic Leukemia;b cell lymphocytic  
leukemia;B-Cell Leukemia;b cell leukemia;b-cell leukemia;leukemia b  
cell|C0023434;C2004493|||C0023434|CHV;NCI|||  
CLL|B-Lymphocytic Leukemia|C2004493|||C0023434|NCI|||  
CLL|B-cell chronic lymphocytic leukaemia/small lymphocytic lymphoma;B-cell  
chronic lymphocytic leukemia/small lymphocytic lymphoma|||C0023434|SNOMEDCT|||  
CLL|B-cell chronic lymphocytic leukemia (disorder)|||C0023434|SNOMEDCT|||  
CLL|B-cell chronic lymphocytic leukemia/small lymphocytic lymphoma (morphologic  
abnormality)|||C0023434|SNOMEDCT|||  
CLL|Chronic lymphocytic leukemia, morphology (morphologic  
abnormality)|||C0023434|SNOMEDCT|||  
CLL|Chronic lymphoid leukemia, disease (disorder)|||C0023434|SNOMEDCT|||  
CLL|DIFFUSE WELL DIFFER LYMPHOCYTIC LYMPHOMA;LYMPHOCYTIC LYMPHOMA DIFFUSE WELL  
DIFFER;LYMPHOMA LYMPHOCYTIC DIFFUSE WELL DIFFER|||C0023434|MSH|||  
CLL|Diffuse Well Differentiated Lymphocytic Lymphoma;Diffuse Well-Differentiated  
Lymphocytic Lymphoma;Lymphocytic Lymphoma, Diffuse, Well  
Differentiated;Lymphocytic Lymphoma, Diffuse, Well-Differentiated;Lymphoma,

Lymphocytic, Diffuse, Well Differentiated;Lymphoma, Lymphocytic, Diffuse, Well-Differentiated|||C0023434|MSH;NDFRT|||  
CLL|Hematopoietic - Chronic Lymphocytic Leukemia (CLL)|||C0023434|NCI|||  
CLL|LYMPHOCYTIC LYMPHOMA WELL DIFFER;LYMPHOMA LYMPHOCYTIC WELL DIFFER|||C0023434|MSH|||  
CLL|LYMPHOMA SMALL;SMALL LYMPHOMA|||C0023434|MSH|||  
CLL|Leukemia, Lymphocytic, Chronic, B-Cell [Disease/Finding]|||C0023434|NDFRT|||  
CLL|Lymphocytic Lymphoma;Lymphocytic Lymphomas;Lymphocytic lymphoma;Lymphoma, Lymphocytic;Lymphomas, Lymphocytic|C0023434;C0024303;C0855095|||C0023434|MSH;NDFRT;OMIM|||  
CLL|Lymphocytic Lymphoma, Small;Lymphocytic Lymphomas, Small;Lymphoma, Small Lymphocytic;Lymphomas, Small Lymphocytic;Small Lymphocytic Lymphoma;Small Lymphocytic Lymphomas;Lymphocytic Lymphoma, Well Differentiated;Lymphocytic Lymphoma, Well-Differentiated;Lymphocytic Lymphomas, Well-Differentiated;Lymphoma, Lymphocytic, Well Differentiated;Lymphoma, Lymphocytic, Well-Differentiated Lymphocytic;Lymphomas, Well-Differentiated Lymphocytic;Well-Differentiated Lymphocytic Lymphoma;Well-Differentiated Lymphocytic Lymphomas|C0023434;C0855095|||C0023434|MSH;NDFRT|||  
CLL|Lymphoma, Small Cell;Lymphoma, Small-Cell;Lymphomas, Small-Cell;Small Cell Lymphoma;Small-Cell Lymphoma;Small-Cell Lymphomas|C0023434;C0024303|||C0023434|MSH;NDFRT|||  
CLL|[M]Chronic lymphoid leukaemia;[M]Chronic lymphoid leukemia|||C0023434|SNOMEDCT|||  
CLL|[M]Chronic lymphoid leukaemia (disorder)|||C0023434|SNOMEDCT|||  
CLL|centrocytelike cell|C1516393|||1  
CLL|cholesterol-lowering lipid|||1  
CLL|chronic lymphocytic|||1|0.0033|  
CLL|chronic lymphocytic leukemia cells|||1|0.0019|  
CLL|chronic lymphocytic leukemic|||1|0.0052|  
CLL|cow lung lavage|||1  
CML|ALL|C0444868|||C0105421;C0812385;C1704799|HUGO;NCI|||  
CML|BCR|||C0105421;C0812385|HUGO;LNC;NCI;OMIM|||  
CML|BCR Gene;BCR gene;bcr gene;BREAKPOINT CLUSTER REGION;breakpoint cluster region;Breakpoint Cluster Region Gene|C0812385|||C0812385|CHV;HUGO;MTH;NCI;OMIM|||  
CML|BCR Protein;BCR protein, human;breakpoint cluster region protein, human;c-bcr protein, human|C0105421|||C0105421|MSH;MTH;NCI|||  
CML|BCR wt Allele;Breakpoint Cluster Region wt Allele|C1704799|||C1704799|MTH;NCI|||  
CML|BCR-ABL Positive Chronic Myelogenous Leukemia;Leukemia, Myelogenous, Chronic, BCR-ABL Positive;CGL;CGL - Chronic granulocytic leukaemia;CGL - Chronic granulocytic leukemia;CHRONIC GRANULOCYTIC LEUKEMIA;Chronic Granulocytic Leukemia;Chronic Granulocytic Leukemias;Chronic granulocytic leukaemia;Chronic granulocytic leukemia;Granulocytic Leukemia, Chronic;Granulocytic Leukemias, Chronic;LEUKEMIA, GRANULOCYTIC, CHRONIC;Leukemia, Chronic Granulocytic;Leukemia, Granulocytic, Chronic;Leukemias, Chronic Granulocytic;chronic granulocytic leukaemia;chronic granulocytic leukemia;granulocytic leukemia, chronic;CHRONIC MYELOCYTIC LEUKEMIA;Chronic Myelocytic Leukemia;Chronic Myelocytic Leukemias;Chronic myelocytic leukaemia;Chronic myelocytic leukemia;LEUKEMIA CHRONIC MYELOCYTIC;LEUKEMIA MYELOCYTIC CHRONIC;LEUKEMIA, MYELOCYTIC, CHRONIC;Leukemia, Chronic Myelocytic;Leukemia, Myelocytic, Chronic;Leukemias, Chronic Myelocytic;Myelocytic Leukemia, Chronic;Myelocytic Leukemias, Chronic;chronic myelocytic leukemia;myelocytic leukemia, chronic;CML - Chronic Myelogenous Leukemia;Chronic myelogenous leukemia (CML);chronic myelogenous leukemia (CML);CML - Chronic myeloid leukaemia;CML - Chronic myeloid leukemia;Chronic Myelogenous Leukemia;Chronic Myelogenous Leukemias;Chronic

myelogenous leukaemia;Chronic myelogenous leukemia;LEUKEMIA, CHRONIC MYELOGENOUS;LEUKEMIA, MYELOGENOUS, CHRONIC;Leukemia, Chronic Myelogenous;Leukemia, Myelogenous, Chronic;Leukemias, Chronic Myelogenous;Myelogenous Leukemia, Chronic;Myelogenous Leukemias, Chronic;chronic myelogenous leukaemia;chronic myelogenous leukemia;leukemia, chronic myelogenous;myelogenous leukemia, chronic;Chronic Myelogenous Leukemia, BCR-ABL1 Positive;Chronic myelogenous leukemia, no ICD-O subtype;Chronic myeloid leukaemia, disease;Chronic myeloid leukemia, disease|C0023473|||C0023473|CHV;COSTAR;CSP;CST;DXP;MEDLINEPLUS;MSH;NCI;NDFRT;OMIM;PDQ;QMR;SNOMEDCT|1|0.4572|

CML|BCR1|||C0105421;C0812385;C1704799|NCI;OMIM|||

CML|Breakpoint Cluster Region Protein|C0072449;C0105421|||C0105421|NCI|||

CML|CML;cml|||C0023473;C0105421;C0812385;C1552913;C1704799|CHV;CSP;DXP;HUGO;MEDLINEPLUS;NCI;OMIM;PDQ|||

CML|Chronic Myeloid Leukemia;Chronic Myeloid Leukemias;Chronic myeloid leukaemia;Chronic myeloid leukaemia NOS;Chronic myeloid leukemia;Chronic myeloid leukemia NOS;LEUKEMIA, CHRONIC MYELOID;LEUKEMIA, MYELOID, CHRONIC;Leukemia, Chronic Myeloid;Leukemia, Myeloid, Chronic;Leukemias, Chronic Myeloid;Myeloid Leukemia, Chronic;Myeloid Leukemias, Chronic;Myeloid leukemia, chronic;chronic myeloid leukaemia;chronic myeloid leukemia;chronic myeloid leukemias|C0023473;C2984277|||C0023473|CHV;CSP;DXP;ICD9CM;MEDLINEPLUS;MSH;MTH;NCI;NDFRT;OMIM;SNOMEDCT|1|0.4601|

CML|Chronic myelogenous leukemia, no ICD-O subtype (morphologic abnormality)|||C0023473|SNOMEDCT|||

CML|Chronic myeloid leukaemia (disorder);Chronic myeloid leukemia NOS (disorder)|||C0023473|SNOMEDCT|||

CML|Chronic myeloid leukemia, disease (disorder)|||C0023473|SNOMEDCT|||

CML|Circular Mil;circular mil;[cml\_i]|C1552913|||C1552913|HL7V3.0;MTH;NCI|||

CML|D22S11|C0105421;C1704799|||C0105421;C1704799|NCI|||

CML|D22S662|C0105421;C0812385;C1704799|||C0105421;C0812385;C1704799|HUGO;NCI|||

CML|Hematopoietic - Chronic Myelocytic Leukemia (CML)|||C0023473|NCI|||

CML|LEUKEMIA PHILA POS|||C0023473|MSH|||

CML|Leukemia, Myelogenous, Chronic, BCR-ABL Positive [Disease/Finding]|||C0023473|NDFRT|||

CML|Leukemia, Myelogenous, Ph1 Positive;Leukemia, Myelogenous, Ph1-Positive;Leukemia, Ph1-Positive Myelogenous;Leukemias, Ph1-Positive Myelogenous;Myelogenous Leukemia, Ph1 Positive;Myelogenous Leukemia, Ph1-Positive;Myelogenous Leukemias, Ph1-Positive;Ph1-Positive Myelogenous Leukemia;Ph1-Positive Myelogenous Leukemias;Leukemia, Myeloid, Ph1 Positive;Leukemia, Myeloid, Ph1-Positive;Leukemia, Ph1-Positive Myeloid;Leukemias, Ph1-Positive Myeloid;Myeloid Leukemia, Ph1 Positive;Myeloid Leukemia, Ph1-Positive;MyeloidLeukemias, Ph1-Positive;Ph1-Positive Myeloid Leukemia;Ph1-Positive Myeloid Leukemias;Leukemia, Myeloid, Philadelphia Positive;Leukemia, Myeloid, Philadelphia-Positive;Leukemia, Philadelphia-Positive Myeloid;Leukemias, Philadelphia-Positive Myeloid;Myeloid Leukemia, Philadelphia Positive;Myeloid Leukemia, Philadelphia-Positive;Myeloid Leukemias, Philadelphia-Positive Myeloid Leukemias|C0023473;C0023476|||C0023473|MSH;NDFRT|||

CML|N epsilon-carboxymethyllysine|||1|0.0024|

CML|N(epsilon)-(carboxymethyl)lysine|||1|0.0171|

CML|Nepsilon-(Carboxymethyl)lysine|||1|0.0058|

CML|PHL|||C0105421;C0812385;C1704799|HUGO;NCI|||

CML|[M]Chronic myeloid leukaemia;[M]Chronic myeloid leukemia|||C0023473|SNOMEDCT|||

CML|carboxymethyllysine|C0083528|||C0083528|MSH|1|0.0081|

CML|cell-mediated lymphocytotoxicity|||1|0.0036|1

CML|cell-mediated lympholysis|C0301896|||C0301896|NCI;SNOMEDCT|1|0.039|1

CML|cell-mediated lysis|||||1|0.0026|1  
 CML|central motor latency|||||1  
 CML|chronic myeloblastic leukemia||1|1.000||||1  
 CML|chronic myeloid leukemic|||||1|0.0024|  
 CML|count median length|||||1  
 CML|cross midline|||||1  
 CML|mediated lysis|||||1|0.0017|  
 CMP|5'-Cytidylic acid;Acid, Cytidylic;Acids, Cytidylic;Cytidylic Acid;Cytidylic  
 Acids;Cytidylic acid;cytidylic acid;CMP (cytidine monophosphate);cytidine  
 monophosphate (CMP);Cytidine Monophosphate;Cytidine monophosphate;Monophosphate,  
 Cytidine;cytidine  
 monophosphate|C0010729|||C0010729|CHV;CSP;MSH;MTH;NDFRT;SNOMEDCT|1|0.0921|1  
 CMP|C'MP protocol;lomustine/methotrexate/procarbazine  
 protocol|C0054385|||C0054385|MSH;MTH|||  
 CMP|CARTILAGE MATRIX PROTEIN;Cartilage matrix protein;MATRILIN  
 1|C0054832;C1417041|||C1417041|OMIM|1|0.1513|  
 CMP|CCNU/MTX/PCB|||C0054385|NCI;PDQ|||  
 CMP|CMP|||C0010729;C0054385;C1417041|MSH;NCI;NDFRT;OMIM;PDQ;SNOMEDCT|||  
 CMP|CRTM;MATN1;MATN1 gene;matrilin 1, cartilage matrix  
 protein|C1417041|||C1417041|HUGO;MTH;OMIM|||  
 CMP|Cytidine Monophosphate [Chemical/Ingredient]|||C0010729|NDFRT|||  
 CMP|Cytidylic acid (substance)|||C0010729|SNOMEDCT|||  
 CMP|Lomustine/Methotrexate/Procarbazine;lomustine/methotrexate/procarbazine|||C  
 0054385|NCI;PDQ|||  
 CMP|calorie-protein malnutrition|||||1  
 CMP|captioned media program|||||1  
 CMP|cardiomyopathy|C0878544|1|0.006|C0878544|AOD;CCS;CHV;COSTAR;CSP;CST;DXP;ICD9  
 CM;MEDLINEPLUS;MSH;NCI;OMIM;SNOMEDCT|1|0.3553|1  
 CMP|caseinomacropeptide|C0286762|||||1|0.0789|  
 CMP|cervical mucus penetration|||||1  
 CMP|chemical mechanical polishing|||||1|0.0461|  
 CMP|chondromalacia patella;chondromalacia patellae|C0008475|||C0008475|CHV|||1  
 CMP|colorimetric microtiter plate|||||1  
 CMP|competitive medical plans|C0085130|||||1  
 CMP|complementary medical practice|||||1  
 CMP|complexity of mental processes|||||1  
 CMP|comprehensive medical plan|||||1  
 CMP|comprehensive metabolic panel|C0519825|1|0.990||||1  
 CMP|control measurement point|||||1  
 CMP|cow's milk protein|C0440448|||||1|0.1645|1  
 CMP|crossmodal priming|||||1  
 CMP|cushion mouthpiece|||||1  
 CMP|cyclophosphamide|C0010583|1|0.002||||1  
 CMP|cytidine 5'-monophosphate|||||1|0.0658|  
 CMP|dynamic cardiomyoplasty|C0242637|||||1|0.0461|  
 CMS|CAS LIGAND WITH MULTIPLE SH3 DOMAINS;CD2AP;CD2AP  
 gene|C1422519|||C1422519|HUGO;MTH;OMIM|||  
 CMS|CD2-ASSOCIATED PROTEIN;CD2-associated protein|||C1422519|HUGO;OMIM|||  
 CMS|CENTERS FOR MEDICARE MEDICAID SERV|||C0041718|MSH|||  
 CMS|CMS;Centers for Medicare and Medicaid Services;Centers for Medicare&Medicaid  
 Services;center medicaid medicare services;centers medicaid medicare  
 services;HCFA;Health Care Financing Administration;United States Health Care  
 Financing  
 Administration|C0041718|1|0.008|C0041718;C1422519;C1880120|CHV;HUGO;LNC;MSH;MTH;  
 NCI;OMIM|1|0.1692|1  
 CMS|Cardiovascular Measurement system|||||1  
 CMS|Centers for Medicare and Medicaid Services (U.S.)|||C0041718|MSH|||

CMS|Clyde Mood Scale|||||||1  
CMS|Colony Management System|C1880120|||C1880120|MTH;NCI|||  
CMS|Conditioned media|C0162518|||||1|0.0227|  
CMS|Conflict Management Survey|||||||1  
CMS|Congenital Myasthenic Syndromes|C0751882|||||1|0.1111|  
CMS|HEALTH CARE FINANCING ADMIN|||C0041718|MSH|||  
CMS|Health Care Financing Administration (U.S.)|||C0041718|MSH|||  
CMS|UNITED STATES CENTERS FOR MEDICARE MEDICAID SERV|||C0041718|MSH|||  
CMS|UNITED STATES HEALTH CARE FINANCING ADMIN|||C0041718|MSH|||  
CMS|United States Centers for Medicare and Medicaid Services;united states  
centers for medicare and medicaid services|||C0041718|CHV;MSH|||  
CMS|cardiomediastinal silhouette|||||||1  
CMS|cavernous malformations|||||1|0.0505|  
CMS|central margin syndrome|||||||1  
CMS|central material section|||||||1  
CMS|central material supply|||||||1  
CMS|cervical magnetic stimulation|||||1|0.048|  
CMS|cervical mucous solution|||||||1  
CMS|cholesterol monitoring system|||||||1  
CMS|chromosome modification site|||||||1  
CMS|chronic mild stress|||||1|0.1338|  
CMS|chronic mountain sickness|C0274294|||||1|0.0732|  
CMS|chronic mycelial stomatitis|||||||1  
CMS|chronic myelodysplastic syndrome|||||||1  
CMS|chylomicrons|C0008731|||||1|0.0303|  
CMS|circulation, motion, sensation||1|0.982|||||1  
CMS|clean, midstream|||||||1  
CMS|click-murmur syndrome|C0026267|||||||1  
CMS|clofibrate-induced muscular syndrome|||||||1  
CMS|cochlear microphonics|||||1|0.0379|  
CMS|compliance matching stent|||||||1  
CMS|continuous motion syndrome|||||||1  
CMS|cortical magnetic stimulation|||||||1  
CMS|cystadenoma with mesenchymal stroma|||||1|0.0177|  
CMS|cytoplasmic male sterile|||||1|0.0859|  
CMS|cytoplasmic male sterility|||||1|0.1971|  
CMS|solubilization|||||1|0.0227|  
CMV|CDDP/MTX/VBL|||C0285131|NCI;PDQ|||  
CMV|CMV|||C0010825;C0278819;C0285131|CHV;CSP;MEDLINEPLUS;NCI;PDQ|||  
CMV|CMV - Cytomegalovirus;CMV, CYTOMEGALOVIRUS;cmv  
cytomegalovirus;cytomegalovirus (CMV);Cytomegalovirus;Cytomegalovirus,  
NOS;Cytomegaloviruses;cytomegalovirus;Cytomegalovirus group;Cytomegalovirus  
group, NOS;cytomegalovirus group;Genus Cytomegalovirus;Salivary Gland  
Virus;Salivary Gland Viruses;Salivary gland virus;Salivary gland virus,  
NOS;Virus, Salivary Gland;Viruses, Salivary Gland;salivary gland virus;salivary  
gland  
viruses|C0010825|1|0.972|C0010823;C0010825|AOD;CHV;CSP;LCH;LNC;MSH;MTH;NCBI;NCI;  
SNOMEDCT|1|0.9302|1  
CMV|CMV chemotherapy protocol;MEC Protocol 1;MEC protocol  
1;cisplatin/methotrexate/vinblastine  
protocol|C0285131|||C0285131|CHV;MSH;MTH;NCI|||  
CMV|CTX/MTX/VP-16|||C0278819|NCI;PDQ|||  
CMV|Cisplatin/Methotrexate/Vinblastine;cisplatin, methotrexate,  
vinblastine;cisplatin/methotrexate/vinblastine||1|0.002|C0285131|NCI;PDQ|||  
CMV|Clo Mor virus|C0319042|||||||1  
CMV|Cyclophosphamide/Etoposide/Methotrexate;cyclophosphamide/etoposide/methotrex  
ate|||C0278819|NCI;PDQ|||

CMV|Cytomegalovirus (living organism) (organism)||||C0010825|SNOMEDCT|||  
CMV|Cytomegalovirus (living organism) [Ambiguous]||||C0010825|SNOMEDCT|||  
CMV|Cytomegalovirus group virus||||C0010825|SNOMEDCT|||  
CMV|Cytomegalovirus group virus (organism)||||C0010825|SNOMEDCT|||  
CMV|Genus Cytomegalovirus (organism)||||C0010825|SNOMEDCT|||  
CMV|MCV|C0524587|||C0285131|PDQ|||  
CMV|anti-cytomegalovirus|||||1|0.0062|  
CMV|canalicular membrane vesicles|||||1|0.0023|  
CMV|cancer family syndrome|C2931592|||||1|  
CMV|cerebrospinal fluid|C0007806;C0007807|||||1|  
CMV|circumferential shortening fraction|||||1|  
CMV|colony-stimulating factor|C0009392;C0079460|||||1|  
CMV|continuous mandatory ventilation||1|0.026||||1|  
CMV|continuous mechanical ventilation|||||1|  
CMV|contoured femoral stem|||||1|  
CMV|controlled mechanical ventilation|C0419012|||C0419012|CHV;SNOMEDCT|||1|  
CMV|conventional mechanical ventilation|||||1|0.0205|1|  
CMV|cool mist vaporizer|||||1|  
CMV|coronary sinus flow|||||1|  
CMV|cucumber mosaic cucumovirus|||||1|0.0028|  
CMV|cucumber mosaic virus|C0520499|||||1|0.0306|1|  
CMV|cyclophosphamide/etoposide/methotrexate protocol||||C0278819|MTH|||  
CMV|cytomegaloviral|||||1|0.003|  
CMV|cytomegalovirus infection|C0010823|||||1|0.0028|  
CMV|promoter|C0086860|||||1|0.0015|  
CNS|CLIN NURSE SPECIALIST;CLIN NURSE SPECIALISTS;NURSE SPECIALIST CLIN;NURSE  
SPECIALISTS CLIN;SPECIALIST CLIN NURSE;SPECIALISTS CLIN NURSE||||C0028654|MSH|||  
CNS|CNS|||C0028654;C0445625;C0927232;C2347597|AOD;CSP;FMA;NCI|||  
CNS|CNS - Clinical nurse specialist;Clin Spec;Clinician, Nurse;Clinicians,  
Nurse;Nurse Clinician;Nurse Clinicians;nurse clinician;nurse  
clinicians|C0028654|||C0028654|CHV;MSH;NCI;SNOMEDCT|||  
CNS|CNS - Coagulase-negative staphylococcus;COAGULASE NEGATIVE  
STAPHYLOCOCCUS;Coagulase-Negative Staphylococcus;Coagulase-negative  
staphylococcus;Staphylococcus, coagulase negative;coagulase negative  
staphylococcus;coagulase-negative staphylococci;coagulase-negative  
staphylococcus;Staphylococcus, coagulase negative  
(organism)|C0445625|||C0445625|CHV;MTH;NCI;SNOMEDCT|1|0.0283|1|  
CNS|Canadian Neurological Scale|||||1|0.0013|  
CNS|Central Nervous System;Central Nervous Systems;Central nervous  
system;Nervous System, Central;Nervous Systems, Central;System, Central  
Nervous;Systems, Central Nervous;central nervous  
system|C0927232;C1269563|1|0.998|C0927232;C1269563|AOD;CSP;CST;FMA;LCH;MSH;NCI;O  
MIM;SNOMEDCT;UWDA|1|0.9558|1|  
CNS|Central nervous system structure;Structure of central nervous  
system;Cerebrospinal axis;Nervous System, CNS;Neuraxis;neuraxis;Pars  
centralis;Systema nervosum  
centrale|C0927232|||C0927232|AOD;CHV;FMA;MTH;NCI;SNOMEDCT;UWDA|||  
CNS|Central nervous system structure (body structure);Structure of central  
nervous system (body structure)|||C0927232|SNOMEDCT|||  
CNS|Certified Nurse Specialist|C1549961;C2347597|||C2347597|MTH;NCI|||  
CNS|Clinical Nurse Specialist;Clinical Nurse Specialists;Clinical nurse  
specialist;Nurse Specialist, Clinical;Nurse Specialists, Clinical;Specialist,  
Clinical Nurse;Specialists, Clinical Nurse;clinical nurse specialist;clinical  
nurse  
specialists|C0028654;C1610180|1|0.002|C0028654;C1610180|CHV;HL7V3.0;MSH;MTH;NCI;  
SNOMEDCT|1|0.0113|  
CNS|Clinical nurse specialist (occupation)|||C0028654|SNOMEDCT|||

CNS|Congenital nephrotic syndrome;congenital nephrotic syndrome|C0268713;C0403399|||C0268713|CHV;NCI;SNOMEDCT|1|0.0019|1  
CNS|central nervous|||1|0.0009|  
CNS|coagulase-negative staphylococcal|||1|0.0005|  
CNS|computerized notation system|||1|  
COPD|CAFL - Chronic airflow limitation;CAL - Chronic airflow limitation;CHRONIC OBSTRUCTIVE LUNG DISEASE;Chronic Obstructive Lung Disease;Chronic obstructive lung disease;Chronic obstructive lung disease, NOS;chronic obstructive lung disease;COAD;coad;COAD - Chronic obstructive airways disease;COLD (chronic obstructive lung disease);COLD - Chronic obstructive lung disease;COPD;COPD NOS;Chronic Obstructive Airway Disease;Chronic Obstructive Airways Disease;Chronic obstructive airway disease;Chronic obstructive airways disease NOS;Chronic airflow limitation;chronic airflow limitation;Chronic airway disease;chronic airway disease;chronic airways disease;Chronic airway obstruction;Chronic irreversible airway obstruction;Chronic obstructive pulmonary disease  
finding|C0024117|||C0024117;C1847014|AOD;CHV;COSTAR;CSP;DXP;LNC;MSH;MTH;MTHICD9; NCI;NDFRT;OMIM;SNOMEDCT|||  
COPD|CHRONIC OBSTRUCTIVE AIRWAY DIS|||C0024117|MSH|||  
COPD|CHRONIC OBSTRUCTIVE LUNG DIS|||C0024117|MSH|||  
COPD|CHRONIC OBSTRUCTIVE PULM DIS;PULM DIS CHRONIC OBSTRUCTIVE|||C0024117|MSH|||  
COPD|CHRONIC OBSTRUCTIVE PULMONARY DISEASE;Chronic Obstructive Pulmonary Disease;Chronic obstructive pulmonary disease;Chronic obstructive pulmonary disease NOS;PULMONARY DISEASE, CHRONIC OBSTRUCTIVE;Pulmonary Disease, Chronic Obstructive;chronic obstructive pulmonary disease;CHRONIC OBSTRUCTIVE PULMONARY DISEASE, (COPD);COPD (Chronic Obstructive Pulmonary Disease);COPD - Chronic obstructive pulmonary disease;COPD, CHRONIC OBSTRUCTIVE PULMONARY DISEASE;Chronic Obstructive Pulmonary Disease (COPD);OBSTRUCTIVE PULMONARY DISEASE (COPD), CHRONIC;PULMONARY DISEASE (COPD), CHRONIC OBSTRUCTIVE;chronic obstructive pulmonary disease  
(COPD)|C0024117;C1847014|1|1|C0024117;C1847014|CHV;CSP;DXP;MEDLINEPLUS;MSH;MTH;M THICD9;NCI;NDFRT;OMIM;SNOMEDCT|1|1|1  
COPD|COLD|C0009264;C0009443;C0234192|||C0024117|NCI;SNOMEDCT|||  
COPD|Chronic airway obstruction; not otherwise specified|C0024117;C1518425|||C0024117|CCS|||  
COPD|Chronic obstructive airways disease NOS (disorder)|||C0024117|SNOMEDCT|||  
COPD|Chronic obstructive lung disease (disorder)|||C0024117|SNOMEDCT|||  
COPD|Chronic obstructive lung disease [Ambiguous]|||C0024117|SNOMEDCT|||  
COPD|Chronic obstructive pulmonary disease finding (finding)|||C0024117|SNOMEDCT|||  
COPD|DISEASE (COPD), CHRONIC OBSTRUCTIVE|||C0024117|NCI|||  
COPD|PULMONARY DISEASE, CHRONIC OBSTRUCTIVE, SEVERE EARLY-ONSET|C1847014|||C1847014|MTH;OMIM|||  
COPD|Pulmonary Disease, Chronic Obstructive [Disease/Finding]|||C0024117|NDFRT|||  
COR|3'-deoxyadenosine;3'-Deoxyadenosine;3'-deoxyadenosine;3'-dA-CE Phosphoramidite;3-dAdenosine;9-Cordyceposidoadenine;CORDYCEPIN;Cordycepin;cordycepin;Cordycepine;Kordicepin|C0056331|||C0056331|CHV;CSP;MSH;MTH;NCI;PDQ;SNOMEDCT|||  
COR|3'-Deoxyadenosine (product)|||C0056331|SNOMEDCT|||  
COR|3'-Deoxyadenosine (substance)|||C0056331|SNOMEDCT|||  
COR|COR;Cor|C0018787;C0056331|||C0018787;C0056331|FMA;NCI;PDQ|||  
COR|Cardiac;cardiac|C0018787;C1522601|||C0018787|AOD;CHV;CSP;NCI|||  
COR|Cardiac structure;cardiac structure;Heart structure;heart structure;coronary|C0018787|||C0018787|CHV;CSP;SNOMEDCT|||1  
COR|Cardiac structure (body structure)|||C0018787|SNOMEDCT|||

COR|Congo red|C0009742|||||1  
COR|HEART;Heart;Heart,  
NOS;Hearts;heart|C0018787;C1281570|||C0018787|AIR;AOD;CHV;CSP;FMA;HL7V2.5;LCH;LNC;MSH;MTH;NCI;OMIM;SNOMEDCT;UWDA|||  
COR|Heart structure (body structure)|||C0018787|SNOMEDCT|||  
COR|body|C0242821;C0460148;C1268086|||||1  
COR|cardi(o)-|||C0018787|AOD|||  
COR|cardiac output recorder|||||1  
COR|cardiovascular|C0007226|1|0.980|||  
COR|center of rotation|C2986818|||||1|0.0885|  
COR|cervico-ocular reflex;cervicoocular reflex|||||1|0.2478|1  
COR|coefficient of repeatability|||||1|0.0796|  
COR|coefficient of reproducibility|||||1  
COR|cold-regulated|||||1|0.0796|  
COR|conditioned orientation reflex|||||1  
COR|corepressor|||||1  
COR|coroner|C0010082|||||1  
COR|corrosion|C0010106;C1880183;C2919087|||C0010106;C1880183|CHV;CSP;MSH;MTH;NCI|||1  
COR|corrosive|C0524525|||C0524525;C1548763;C1551398|CHV;HL7V2.5;HL7V3.0|||1  
COR|cortex|C0007776;C1176472;C2700441|||C0001614;C0007776;C0595905;C1176472;C2700441|CHV;CST;FMA;NCI;UWDA|||  
COR|corticosterone|C0010124|||||1|0.1858|  
COR|cortisol|C0020268|||||1|0.1858|  
COR|cortisone|C0010137|||C0010137|AOD;CHV;CSP;LCH;LNC;MSH;MTH;NCI;NDFRT;PDQ;RXNORM;SNOMEDCT;USPMG;VANDF|||1  
COR|phytotoxin coronatine|||||1|0.1327|  
CPAP|BM032;CENPJ;CENPJ gene;CENTROMERIC PROTEIN J;CENTROSOMAL P4.1-ASSOCIATED PROTEIN;SASS4;Sas-4;centromere protein J|C1424863|||C1424863|HUGO;MTH;OMIM|||  
CPAP|CPAP|C0199451;C1424863|||C0199451;C1424863|CHV;CSP;HUGO;MTHICD9;OMIM|||  
CPAP|CPAP (continuous positive airway pressure);CPAP - Continuous positive airways pressure;continuous positive airway pressure (CPAP);CPAP Ventilation;Ventilation, CPAP;cpap ventilation;CPAP treatment;cpap treatment;Continuous CPAP;Continuous Positive Airway Pressure;Continuous positive airways pressure;Pressure.continuous positive airway;continuous positive airway pressure;Continuous positive airway pressure ventilation treatment|C0199451|||C0199451|CHV;CSP;LNC;MSH;MTH;SNOMEDCT|1|0.996|  
CPAP|CPAP - Continuous positive airways pressure therapy|||C0199451|SNOMEDCT|||  
CPAP|Continuous CPAP (procedure)|||C0199451|SNOMEDCT|||  
CPAP|Continuous CPAP (regime/therapy)|||C0199451|SNOMEDCT|||  
CPAP|Continuous positive airway pressure breathing|||||1|0.004|  
CPAP|Continuous positive airway pressure ventilation treatment (procedure)|||C0199451|SNOMEDCT|||  
CPAP|Continuous positive airway pressure ventilation treatment (regime/therapy)|||C0199451|SNOMEDCT|||  
CPAP|Continuous positive airways pressure (observable entity)|||C0199451|SNOMEDCT|||  
CPAP|Continuous positive airways pressure therapy|||C0199451|SNOMEDCT|||  
CPAP|LAP|||C1424863|HUGO|||  
CPAP|LIP1|C1418785;C1424863;C1426073|||C1424863|HUGO|||  
CPAP|constant positive airway pressure||1|1.000||||1  
CPK|ADP Phosphocreatine Phosphotransferase;Phosphocreatine Phosphotransferase, ADP;Phosphotransferase, ADP Phosphocreatine;ATP Creatine Phosphotransferase;Creatine Phosphotransferase, ATP;Phosphotransferase, ATP Creatine;CK - Creatine kinase;creatine kinase (CK);CPK - Creatine phosphokinase;creatine phosphokinase (CPK);Creatine Kinase;Creatine kinase;Kinase, Creatine;creatine kinase;Creatine Kinase-B;Creatine Kinase-B

Chain;Creatine Phosphokinase;Creatine phosphokinase;Phosphokinase,  
Creatine;creatine  
phosphokinase;creatinephosphokinase|C0010287|1|1|C0010287;C0750863|AOD;CHV;CSP;L  
CH;LNC;MSH;MTH;NCI;NDFRT;SNOMEDCT|1|0.9624|1  
CPK|ATP:creatine N-phosphotransferase|||C0010287|MSH;NDFRT|||  
CPK|C2-CONTAINING PHOSPHATIDYLINOSITOL KINASE;PHOSPHATIDYLINOSITOL 3-KINASE,  
CLASS 2, ALPHA;PI3K-C2alpha;PIK3C2A;PIK3C2A  
gene|C1418571|||C1418571|HUGO;MTH;OMIM|||  
CPK|CKB|||C0010287|NCI|||  
CPK|CPK|||C0010287;C1418571|CHV;OMIM|||  
CPK|Cell proliferation kinetics|||1|0.0106|  
CPK|Creatine Kinase [Chemical/Ingredient]|||C0010287|NDFRT|||  
CPK|Creatine kinase (substance)|||C0010287|SNOMEDCT|||  
CPK|EC 2.7.3.2|||C0010287|NCI|||  
CPK|calcium-dependent protein kinase|C0054490|||C0054490|MSH|||  
CPK|creatine phosphate kinase|||1|0.0106|  
CPK|phosphoinositide-3-kinase, class 2, alpha  
polypeptide|C1310696;C1418571|||C1418571|HUGO|||  
CPK|phosphokinase activity|C2266365|||1|0.0164|  
CPM|(-)-  
Cyclophosphamide;CYCLOPHOSPHAMIDE;Cyclophosphamide;cyclophosphamide;CYT;cyt;cyts  
;Ciclofosfamida;Ciclofosfamide;Claphene;Cyclophospham;Cyclophosphamidum;Cyclopho  
sphan;Cyclophosphane;cyclophosphane;Cyclophosphanum;Cytophosphan;Cytophosphane;M  
itoxan;Syklofosfamid;Zytoxan|C0010583|||C0010583|CHV;CSP;LNC;MSH;MTH;MTHSPL;NCI;  
NDFRT;PDQ;RXNORM;SNOMEDCT;USPMG;VANDF|1|0.2597|  
CPM|2H-1,3,2-Oxazaphosphorin-2-amine, N,N-bis(2-chloroethyl)tetrahydro-, 2-  
oxide;N,N-Bis(2-chloroethyl)tetrahydro-2H-1,3,2-oxazaphosphorin-2-amine 2-  
Oxide|||C0010583|MSH;NDFRT;PDQ|||  
CPM|2H-1,3,2-oxazaphosphorin-2-amine, N,N-is(2-chloroethyl)tetrahydro-,2-  
oxide|||C0010583|PDQ|||  
CPM|CARBOXYPEPTIDASE M;Carboxypeptidase M;carboxypeptidase  
M|C0054762;C1413672|||C1413672|HUGO;OMIM|1|0.0276|  
CPM|CPM;cpm|||C0010583;C0392412;C1413672;C1705768;C2348028|HUGO;NCI;OMIM;PDQ;SN  
OMEDCT|||  
CPM|CPM gene|C1413672|||C1413672|HUGO;MTH|||  
CPM|CTX|C0293227|||C0010583|NCI;PDQ;SNOMEDCT|||  
CPM|Cefpiramide|C0055010|||1|0.0763|  
CPM|Clinical Practice Model|||1|  
CPM|Colored Progressive Matrices|||1|  
CPM|Continuous Passive Motion;continuous passive motion||1|1|1|0.1656|1  
CPM|Contralateral Prophylactic Mastectomy|C1705768|||C1705768|MTH;NCI|||  
CPM|Count per Minute;Counts per minute;count per minute;counts per minute;Counts  
per minute (cpm)|C0392412|||C0392412|CHV;MTH;NCI;SNOMEDCT|1|0.1396|1  
CPM|Count/Minute|||C0392412|NCI|||  
CPM|Cycle per Minute;cycle per minute|C2348028|||C2348028|MTH;NCI|||1  
CPM|Cycle/min;cycle/min|||C2348028|NCI|||  
CPM|Cyclophosphamide (product)|||C0010583|SNOMEDCT|||  
CPM|Cyclophosphamide (substance)|||C0010583|SNOMEDCT|||  
CPM|Cyclophosphamide [Chemical/Ingredient]|||C0010583|NDFRT|||  
CPM|cancer pain management|C0392921|||1|  
CPM|central pontine myelinolysis|C0206083|||1|0.1867|1  
CPM|chlorpheniramine maleate|C0546857|||1|0.0487|  
CPM|chronic progressive myelopathy|||1|  
CPM|cognitive-perceptual-motor|||1|  
CPM|confined placental mosaicism|||1|0.0763|1  
CPM|continue present management|||1|  
CPM|cpm (qualifier value)|||C0392412|SNOMEDCT|||

CPM|critical path method|||||1|0.013|  
CPM|percentage of normal 2-4 cycles/min|||||1|0.0065|  
CPR|C-peptide immunoreactivity|||||1|0.0289|  
CPR|C-peptide reactivity|||||1|0.0054|  
CPR|CARDIO PULM RESUSCITATION;CARDIOPULM RESUSCITATION|||C0007203|MSH|||  
CPR|CPR;CPR (cardiopulmonary resuscitation);CPR - Cardiopulmonary  
resuscitation;cardiopulmonary resuscitation (CPR);Cardio Pulmonary  
Resuscitation;Cardio-Pulmonary Resuscitation;Cardiopulmonary  
Resuscitation;Cardiopulmonary resuscitation;Cardiopulmonary resuscitation,  
NOS;Resuscitation, Cardio-Pulmonary;Resuscitation, Cardiopulmonary;cardio-  
pulmonary resuscitation;cardiopulmonary resuscitation;Cardiopulmonary  
resuscitation, not otherwise specified;heart  
resuscitation|C0007203|1|0.994|C0007203|AOD;CHV;CSP;ICD9CM;MEDLINEPLUS;MSH;SNOME  
DCT|1|0.8239|1  
CPR|Cardiopulm resuscita NOS|||C0007203|ICD9CM|||  
CPR|Cardiopulmonary resuscitation (& closed cardiac massage &  
ventilation)|||C0007203|SNOMEDCT|||  
CPR|Cardiopulmonary resuscitation (& closed cardiac massage & ventilation)  
(procedure)|||C0007203|SNOMEDCT|||  
CPR|Cardiopulmonary resuscitation (procedure)|||C0007203|SNOMEDCT|||  
CPR|Closed cardiac massage+ventil.|||C0007203|SNOMEDCT|||  
CPR|Computerized Patient Record|C0600372|||||1|0.0102|  
CPR|P450 reductase|||||1|0.0278|  
CPR|carboxypeptidase R|C0255161|||||1|0.0043|  
CPR|cardiac and pulmonary rehabilitation|||||1|  
CPR|cardiopulmonary reserve|||||1|  
CPR|cefpirome|C0062986|||||1|0.0214|  
CPR|cefpirome sulfate|C0771341|||||1|0.0054|  
CPR|centripetal rub|||||1|  
CPR|cerebral cortex perfusion rate|||||1|  
CPR|chicken progesterone receptor|||||1|0.0075|  
CPR|chlorophenyl red|||||1|  
CPR|clinical partial response|||||1|  
CPR|clinical pregnancy rate|||||1|0.0037|  
CPR|cochleopalpebral reflex|C0450273|||||1|  
CPR|computer-based patient record|||||1|0.0273|1  
CPR|contraceptive prevalence rate|||||1|0.0139|  
CPR|cortisol production rate|||||1|0.0043|1  
CPR|cumulative potency rate|||||1|  
CPR|cumulative pregnancy rate|||||1|0.0048|  
CPR|curved multiplanar reformation|||||1|  
CPR|customary, prevailing, and reasonable|||||1|  
CPR|cytochrome P450 oxidoreductase|C1335232|||||1|0.0032|  
CPR|response|C0871261;C1704632;C1706817;C2911692|||||1|0.008|  
CRP|C Reactive Protein;C reactive protein;C-Reactive Protein;C-reactive  
protein;Protein, C-Reactive;c reactive protein;c reactive proteins;CRP - C-  
reactive protein;c-reactive protein  
(CRP)|C0006560;C0201657;C1879974|1|1|C0006560;C0201657;C1879974|CHV;CSP;LCH;LNC;  
MSH;MTH;NCI;NDFRT;SNOMEDCT|1|0.9835|1  
CRP|C reactive protein (substance)|||C0006560|SNOMEDCT|||  
CRP|C-REACTIVE PROTEIN, PENTRAXIN-RELATED;C-reactive protein, pentraxin-  
related;C-Reactive Protein, Pentraxin-Related Gene;CRP Gene;CRP gene;PENTRAXIN  
1, SHORT;pentraxin 1|C1413716|||C1413716|HUGO;MTH;NCI;OMIM|||  
CRP|C-Reactive Protein Gene;C-Reactive Protein, Pentraxin-Related wt Allele;CRP  
wt Allele;MGC88244|C1879974|||C1879974|MTH;NCI|||  
CRP|C-Reactive Protein Measurement;C-reactive protein measurement;CRP - C-  
reactive protein level|C0201657|||C0201657|MTH;NCI;SNOMEDCT|||

CRP|C-Reactive Protein [Chemical/Ingredient]|||C0006560|NDFRT|||  
CRP|C-Reactive Protein [Precursor]||C0006560||C0006560|NCI|||  
CRP|C-reactive protein level|C0201657;C0428528|||C0201657|SNOMEDCT|||  
CRP|C-reactive protein measurement (procedure)|||C0201657|SNOMEDCT|||  
CRP|CRP|||C0006560;C0201657;C1413716;C1413766;C1826658;C1879974|CHV;HUGO;NCI;OMIM;SNOMEDCT|||  
CRP|CRP1|||C1413766|OMIM|||  
CRP|CSR1|||C1413766|HUGO;OMIM|||  
CRP|CSR1;CSR1 gene;CYSTEINE-RICH PROTEIN 1;D1S181E|C1413766||C1413766|HUGO;MTH;OMIM|||  
CRP|CYSTEINE- AND GLYCINE-RICH PROTEIN 1;cysteine and glycine-rich protein 1|||C1413766|HUGO;OMIM|||  
CRP|CYSTEINE-RICH PROTEIN|C0599731;C1413766;C1420342|||C1413766|OMIM|||  
CRP|Canalith Repositioning Procedure;canalith repositioning procedure|||1|0.0025|1  
CRP|PPIAP10;PPIAP10 gene|C1826658||C1826658|HUGO;MTH|||  
CRP|PTX1|||C1413716;C1879974|HUGO;NCI;OMIM|||  
CRP|Proteins, specific or class, C-reactive|||C0006560|MSH;NDFRT|||  
CRP|c-reactive protein (CRP) test|C0850970|||C0201657|CHV|||  
CRP|cardiac rehabilitation program|||1|0.0021|1  
CRP|chronic recurrent parotitis|||1|1  
CRP|chronic relapsing pancreatitis|||1|1  
CRP|collagen-related peptide|||1|0.0075|1  
CRP|colorectal polyps|C0949059|||1|1  
CRP|confluent and reticulate papillomatosis;confluent and reticulated papillomatosis;confluent reticulated papillomatosis|C0263385||C0263385|MTHICD9;SNOMEDCT|1|0.0025|1  
CRP|corneal reflection pupillometer|||1|1  
CRP|corneal-retinal potential|||1|1  
CRP|coronary rehabilitation program|||1|1  
CRP|creatine phosphate|C0031634|||1|1  
CRP|cross-reacting protein|||1|1  
CRP|cyclic adenosine monophosphate receptor protein|||1|1  
CRP|cyclophillin related pseudogene|||C1826658|HUGO|||  
CRP|peptidylprolyl isomerase A (cyclophilin A) pseudogene 10|||C1826658|HUGO|||  
CRP|platelet recovery|||1|0.0019|1  
CR|C-reactive||1|0.002|||1  
CR|CD55|||C1824670|HUGO;OMIM|||  
CR|CD55 ANTIGEN;DAF|C0108793;C1824670|||C1824670|OMIM|||  
CR|CD55 gene;DECAY-ACCELERATING FACTOR FOR COMPLEMENT|C1824670|||C1824670|HUGO;MTH;OMIM|||  
CR|CD55 molecule, decay accelerating factor for complement (Cromer blood group)|||C1824670|HUGO|||  
CR|CHROMIUM;Chromium;Chromium, NOS;chromium|C0008574;C1445745;C2348261|||C0008574;C1445745;C2348261|AOD;CHV;CSP;LCH;LNC;MEDLINEPLUS;MSH;MTH;MTHSPL;NCI;NDFRT;RXNORM;SNOMEDCT;VANDF|||1  
CR|COSTA RICA;Costa Rica;costa rica|C0010182|||C0010182|AOD;CHV;LCH;MSH;MTH;NCI;SNOMEDCT|||  
CR|CR;Cr|||C0008574;C0010182;C0677874;C1420667;C1707506;C1824670;C2348261|HUGO;LNC;NCI|||  
CR|CRGF;CRIPTO GROWTH FACTOR;Cripto-1;TDGF1;TDGF1 gene|C1420667|||C1420667|HUGO;MTH;OMIM|||  
CR|CRI|C0010182;C1704519|||C0010182|NCI|||  
CR|CRIPTO|C1332788;C1420667;C1705780|||C1420667|HUGO|||  
CR|CROM|C1292305;C1824670|||C1824670|HUGO|||  
CR|CS|C2987276|||C0010182|NCI|||  
CR|Cajal-Retzius|||1|0.0065|1

CR|Caloric restriction|C1135809|||||1|0.0289|  
CR|Calreticulin|C0054543;C1413096|||||1|0.0021|  
CR|Cardiac Rehabilitation;cardiac rehabilitation|C0700431|||||1|0.0128|1  
CR|Charles River|||||1|0.0015|  
CR|Chromium (substance)||||C0008574|SNOMEDCT|||  
CR|Chromium [Chemical/Ingredient]||||C0008574|NDFRT|||  
CR|Complete Remission;In complete remission;complete remission;Complete  
response;complete response;Pathological Complete Remission;full  
remission|C0677874|1|0.032|C0677874|AOD;CHV;MTH;NCI;SNOMEDCT|1|0.7071|1  
CR|Congo red|C0009742|||||1|0.0059|1  
CR|Controlled Release;controlled release;controlled-  
release|C0868939;C1707506|1|0.906|C1707506|NCI|1|0.0252|1  
CR|Controlled Release Dosage Form;Controlled Release Dose  
Form|C1707506|||C1707506|MTH;NCI|||  
CR|Costa Rica (geographic location)||||C0010182|SNOMEDCT|||  
CR|Cr - Chromium;Cr element|C0008574|||C0008574|CSP;SNOMEDCT|||  
CR|Cryptococcus|C0010415|||||1|  
CR|Czech Republic|C0206578|||||1|0.003|  
CR|Dietary Chromium|C2348261|||C2348261|MTH;NCI|||  
CR|In complete remission (qualifier value)||||C0677874|SNOMEDCT|||  
CR|NATO code for dibenz(b,f)-1:4-oxazepine|||||1|  
CR|TC|C0041405;C1824670|||C1824670|HUGO;LNC|||  
CR|TERATOCARCINOMA-DERIVED GROWTH FACTOR 1;teratocarcinoma-derived growth factor  
1||||C1420667|HUGO;OMIM|||  
CR|achieved complete remission|||||1|0.001|  
CR|calcification rate|||||1|  
CR|calcium-binding protein calretinin|||||1|0.0023|  
CR|calorie restricted;calorie-restricted|||||1|0.0017|1  
CR|calorie restriction|||||1|0.0107|  
CR|capillary refill|C0425716|||||1|  
CR|capture-recapture|||||1|0.0014|  
CR|carbonyl reductase|C1413154|||||1|0.0031|  
CR|cardiac resuscitation|C2981152|||C2981152|CHV;LCH;SNOMEDCT|||1  
CR|cardiac rhythm|C0232187|||C0232187|CHV;NCI;SNOMEDCT|||1  
CR|cardiac rupture|C0018813|||||1|0.001|  
CR|cardiorespiratory||1|0.056|||1|0.0014|1  
CR|cardiorrhexis|||||1|  
CR|caries resistant;caries-resistant|||||1|0.0017|1  
CR|cartilage residue|||||1|  
CR|case report|C0007320;C0085973|||||1|  
CR|cathode ray|C0007443|||C0007443|CHV;MSH|||1  
CR|center of rotation|C2986818|||||1|  
CR|central ray|||||1|  
CR|centric relation|C0007702|||C0007702|CHV;MSH|1|0.0039|1  
CR|charge recombination|||||1|0.0013|  
CR|chemoradiation|C0436307;C1559154|||C0436307;C1559154|NCI|||1  
CR|chest and right arm|||||1|  
CR|chest roentgenogram|||||1|  
CR|chest roentgenograph|||||1|  
CR|chest roentgenography|||||1|  
CR|child-resistant|||||1|  
CR|choice reaction|||||1|  
CR|chorioretinal|||||1|  
CR|chronic rejection|||||1|0.0135|1  
CR|circadian rhythm|C0008810;C1522723|||||1|0.0041|  
CR|clinical record|||||1|  
CR|clinical research|C0008972|||C0008972|AOD;CHV;CSP;MSH;MTH;NCI|||1



CR|cremaster ratio|||||1  
CR|cremasteric reflex|C0234176|||C0234176|SNOMEDCT||  
CR|cresyl red|||||1  
CR|critical ratio|||||1  
CR|cross-reactive|||||1|0.0013|  
CR|crown|C0010384;C0226993;C1185616;C2700388|||||1  
CR|crown-rump|||||1|0.0035|1  
CR|crutches|C0010397|||||1  
CR|cycloplegic refraction|C0855713|||||1  
CR|cysteine-rich|||||1|0.0014|  
CR|energy cost of running|||||1|0.0014|  
CR|pCR|C0032520;C0677874|||C0677874|NCI||  
CR|rates|||||1|0.0027|  
CR|reactivity|||||1|0.0021|  
CR|remodeling|||||1|0.0013|  
CR|resistant|C0332325;C2827757|||||1|0.0023|  
CR|rotation|C0035868;C0677597|||||1|0.0018|  
CR|serum creatinine|C0201976;C0600061|||||1|0.0206|  
CR|serum creatinine concentration|||||1|0.0011|  
CSA|4-chloro-5-sulfamoylanthranilic acid|C0048170|||C0048170|MSH||  
CSA|CHORIONIC SOMATOMAMMOTROPIN A;chorionic somatomammotropin  
A|||C1413752|HUGO;OMIM||  
CSA|CHORIONIC SOMATOMAMMOTROPIN HORMONE 1;CSH1;CSH1  
gene;CSMT;FLJ75407|C1413752|||C1413752|HUGO;MTH;OMIM||  
CSA|CKN1;COCKAYNE SYNDROME, TYPE A;Cockayne Syndrome, Type A;Type A Cockayne  
Syndrome;Cockayne Syndrome, Group A;Group A Cockayne Syndrome;Cockayne Syndrome,  
Type I;Type I Cockayne Syndrome|C0751039|||C0751039|MSH;MTH;OMIM||  
CSA|CKN1 GENE;CSA GENE;ERCC8;ERCC8 gene;EXCISION-REPAIR CROSS-COMPLEMENTING,  
GROUP 8;excision repair cross-complementing rodent repair deficiency,  
complementation group 8|C1414440|||C1414440|HUGO;MTH;OMIM||  
CSA|CSA;CsA|||C0010592;C0751039;C1413752;C1414440|HUGO;NCI;OMIM;PDQ||  
CSA|CSA - Cyclosporin A;CYA - Cyclosporin;CYA - Cyclosporin A;CYSP;Ciclosporin  
product;Cyclosporin product;Cyclosporine (product);Cyclosporin A;Cyclosporine  
A;cyclosporin A;cyclosporin a;cyclosporin-A;cyclosporine a;cyclosporine-  
A|C0010592|1|0.996|C0010592|CHV;CSP;LCH;MSH;NCI;NDFRT;PDQ;SNOMEDCT|1|0.0458|  
CSA|CYCLOSPORINE;Ciclosporin;Cyclosporin;Cyclosporine;ciclosporin;ciclosporins;c  
ycloSPORINE;cyclosporin;cyclosporine|C0010592;C0010594|||C0010592|CHV;CSP;LNC;MS  
H;MTH;MTHSPL;NCI;NDFRT;PDQ;RXNORM;SNOMEDCT;SPN;USPMG;VANDF|1|0.507|  
CSA|Canadian Standards Association|||||1|0.0028|  
CSA|Central sleep apnoea;central sleep  
apnea|C0520680|||C0520680|CHV;MSH;NDFRT;SNOMEDCT|1|0.0123|1  
CSA|Ciclosporin - chemical;Cyclosporin - chemical|||C0010592|SNOMEDCT||  
CSA|Cognitive Skills Assessment|||||1  
CSA|Controlled Substances Act|||||1|0.004|1  
CSA|Cyclosporin - chemical (substance)|||C0010592|SNOMEDCT||  
CSA|Cyclosporine (substance)|||C0010592|SNOMEDCT||  
CSA|Cyclosporine [Chemical/Ingredient]|||C0010592|NDFRT||  
CSA|LACTOGEN, PLACENTAL  
lactogen|C1314785;C1413752;C1413753|||C1413752|HUGO;OMIM||  
CSA|PL|||C1413752|HUGO;OMIM||  
CSA|analysis|C0002778;C0936012;C1524024|||||1|0.0068|  
CSA|canavaninosuccinic acid|C0054576|||C0054576|MSH||1  
CSA|catalyzed signal amplification|||||1|0.0052|  
CSA|cell surface antigen;cell surface  
antigens|C0003339|||C0003339;C1325289|CHV;GO;MSH;NCI;NDFRT|1|0.0012|  
CSA|certified surgical assistant||1|0.002|||  
CSA|chemical shift anisotropy|||||1|0.016|

CSA|chicken serum albumin|||||1|0.0046|  
CSA|childhood sexual abuse|||||1|0.0387|  
CSA|chondroitin sulfate A;chondroitin-4-sulfate|C0086008|||||1|0.0034|1  
CSA|choriomammotropin|C1314785;C1413752|||C1413752|HUGO|||  
CSA|chorionic somatomammotropin hormone 1 (placental  
lactogen)|||C1413752|HUGO|||  
CSA|chronic stable angina|C0699826|||C0699826|CHV;MSH;MTH|1|0.0037|  
CSA|clinical skills assessment|||||1|0.004|  
CSA|clinically significant arrhythmia|||||||1|  
CSA|colon-specific antigen|C0056132|||C0056132|MSH|1|0.0021|1  
CSA|colony-stimulating activity|||||1|0.105|1  
CSA|compressed spectral array|C0443187|||C0443187|SNOMEDCT|1|0.0068|  
CSA|compressed spectral assay|||||||1|  
CSA|computer science and applications|||||1|0.0018|  
CSA|conformational space annealing|||||1|0.0034|  
CSA|continuous spinal anaesthesia;continuous spinal anesthesia|||||1|0.0086|  
CSA|controlled substance analog|||||||1|  
CSA|coronary spastic angina|||||1|0.0061|  
CSA|corticosteroid sensitive asthma|||||||1|  
CSA|cross-sectional area|||||1|0.2061|1  
CSA|cysteine sulfinic acid|C0056878|||||1|0.0046|  
CSA|hCS-A|||||C1413752|HUGO|||  
CSF|CEREBROSPINAL FLUID;Cerebrospinal Fluid;Cerebrospinal Fluids;Cerebrospinal  
fluid;Cerebrospinal fluid, NOS;Fluid, Cerebrospinal;Fluids, Cerebrospinal;In  
Cerebrospinal Fluid;cerebrospinal fluid;CSF - Cerebrospinal fluid;cerebrospinal  
fluid  
(CSF)|C0007806;C0007807|1|1|C0007806;C0007807|AOD;CHV;CSP;FMA;LCH;MSH;MTH;NCI;SN  
OMEDCT;UWDA|1|0.9145|1  
CSF|CF|||||C0007807|MSH|||  
CSF|CSF|||||C0007806;C0007807;C0009392;C0079460;C0376561|CHV;CSP;FMA;LNC;MSH;NCI;  
UWDA|||  
CSF|CSF Recombinant|||||C0376561|NDFRT|||  
CSF|CSF-2|C0079460;C1150621|||C0079460|MSH;NDFRT|||  
CSF|CSF-GM;GM CSF;GM-CSF;GMCSF;gm csf;gm-  
csf;gmcsf|C0079460;C0376563;C2825896|||C0079460|CHV;CSP;MSH;NCI;NDFRT;PDQ;SNOMED  
CT|||  
CSF|CSF2;Colony Stimulating Factor 2;Colony-stimulating factor  
2|C0079460;C1332791|||C0079460|MSH;NCI;NDFRT|||  
CSF|Cell-Growth Inducer, Myeloid;Inducer, Myeloid Cell-Growth;Myeloid Cell  
Growth Inducer;Myeloid Cell-Growth Inducer;Colony stimulating factor  
preparation;MGI 1 Protein;MGI-1 Protein;MGI-  
1|C0009392|||C0009392|MSH;NCI;NDFRT;SNOMEDCT|||  
CSF|Cell-Stimulating Factor, Histamine-Producing;Histamine Producing Cell  
Stimulating Factor;Histamine-Producing Cell-Stimulating Factor;histamine  
producing cell stimulating factor;TC-GM-CSF;Tumor Cell Human GM Colony  
Stimulating Factor;Tumor-Cell Human GM Colony-Stimulating Factor;gm-  
cfs|C0079460|||C0079460|CHV;CSP;MSH;NDFRT|||  
CSF|Cerebral Spinal Fluid;Cerebral spinal fluid;Liquor cerebrospinalis;Spinal  
Fluid;Spinal fluid;spinal  
fluid|C0007806|||C0007806|CSP;CST;FMA;HL7V2.5;LNC;NCI;SNOMEDCT|||  
CSF|Cerebrospinal fluid (substance)|||C0007806|SNOMEDCT|||  
CSF|Colony Stimulating Factor;Colony Stimulating Factors;Colony stimulating  
factor;Colony stimulating factors;Colony-Stimulating Factor;Colony-Stimulating  
Factors;Colony-stimulating factor;Colony-stimulating factor, NOS;colony  
stimulating factor;colony stimulating factors;colony-stimulating factor;colony-  
stimulating factor(s);colony-stimulating factors;colony stimulating factor

(CSF)|C0009392;C0079460|||C0009392;C0079460|AOD;CHV;CSP;LNC;MSH;MTH;NCI;NDFRT;SN  
OMEDCT|1|0.057|1  
CSF|Colony Stimulating Factor, Granulocyte Macrophage;Colony Stimulating Factor,  
Granulocyte-Macrophage;Colony-Stimulating Factor, Granulocyte-Macrophage;Colony-  
stimulating factor, granulocyte-macrophage;Granulocyte Macrophage Colony  
Stimulating Factor;Granulocyte Macrophage Colony-Stimulating Factor;Granulocyte  
macrophage colony stimulating factor;Granulocyte-Macrophage Colony Stimulating  
Factor;Granulocyte-Macrophage Colony-Stimulating Factor;granulocyte macrophage  
colony stimulating factor;granulocyte macrophage colony-stimulating  
factor;granulocyte-macrophage colony stimulating factor;granulocyte-macrophage  
colony-stimulating  
factor|C0079460;C0376563;C1149401;C1332791|||C0079460|CSP;MSH;MTH;NCI;NDFRT;PDQ;  
SNOMEDCT|||  
CSF|Colony stimulating factor (substance);Colony-stimulating factor  
(substance)|||C0009392|SNOMEDCT|||  
CSF|Colony stimulating factor preparation (product)|||C0009392|SNOMEDCT|||  
CSF|Colony stimulating factor preparation (substance)|||C0009392|SNOMEDCT|||  
CSF|Colony-Stimulating Factors [Chemical/Ingredient]|||C0009392|NDFRT|||  
CSF|Colony-Stimulating Factors, Recombinant;Recombinant Colony Stimulating  
Factor;Recombinant Colony-Stimulating Factors;Recombinant Hematopoietic Colony-  
stimulating Factor|C0376561|||C0376561|MTH;NCI;NDFRT|||  
CSF|Colony-Stimulating Factors, Recombinant  
[Chemical/Ingredient]|||C0376561|NDFRT|||  
CSF|Colony-stimulating factor, granulocyte-macrophage  
(substance)|||C0079460|SNOMEDCT|||  
CSF|GMCSF (granulocyte macrophage colony stimulating factor)|||C0079460|CSP|||  
CSF|GRANULOCYTE MACROPHAGE COLONY A STIMULATING FACTOR|||C0079460|MSH|||  
CSF|Granulocyte-Macrophage Colony-Stimulating Factor  
[Chemical/Ingredient]|||C0079460|NDFRT|||  
CSF|Spinal fluid (substance)|||C0007806|SNOMEDCT|||  
CSF|cancer family syndrome|C2931592|||C2931592|MSH|||1  
CSF|cerebrospinal|||||1|0.0027|  
CSF|cerebrospinal fluid samples|||||1|0.0007|  
CSF|circumferential shortening fraction|||||1|  
CSF|classical swine fever|C0019841|||||1|0.0109|  
CSF|contoured femoral stem|||||1|  
CSF|contrast sensitivity function|||||1|0.0073|  
CSF|coronary sinus blood flow|||||1|0.001|  
CSF|coronary sinus flow|||||1|0.0013|1  
CSF|cytostatic factor|C0072454|||||1|0.0045|  
CTA|CT angiography;computed tomography  
angiography|C1536105|||C1536105|SNOMEDCT|1|0.2805|  
CTA|CT during arteriography|||||1|0.0012|  
CTA|CT hepatic arteriography|||||1|0.007|  
CTA|Cell Transit Analyzer|||||1|0.0117|  
CTA|Computed tomographic arteriography|||||1|0.0153|  
CTA|Computed tomographic arthrography|||||1|0.0059|  
CTA|antigens|C0003320|||||1|0.0129|  
CTA|cellulose triacetate|C0055048|||||1|0.0317|  
CTA|chemotactic activity|||||1|  
CTA|chemotherapeutic  
agent|C0003392;C0729502|||C0003392;C0729502|CHV;MTH;NCI;SNOMEDCT|||  
CTA|chromotropic acid|C0055644|||||1|  
CTA|clear to auscultation||1|0.792|||||1|  
CTA|composite tissue allograft|||||1|0.0106|  
CTA|computed tomographic angiographic|||||1|0.007|  
CTA|computed tomographic angiography||1|0.200|||1|0.1315|1

CTA|computed tomography of abdomen|C0412620|||||1  
CTA|conditioned taste aversion|C0815105|||C0815105|AOD;CHV;GO|1|0.4472|  
CTA|conditioned taste avoidance|||||1|0.0094|  
CTA|congenital trigeminal anesthesia|||||1  
CTA|cortical taste area|||||1|0.0129|  
CTA|cuff tear arthropathy|||||1  
CTA|cystine trypticase agar|||||1  
CTA|cytoplasmic tubular aggregate|||||1  
CTA|cytotoxic activity|||||1|0.0094|  
CTA|cytotoxic assay|||||1  
CTA|menses|C0025344;C0559892|||||1  
CTA|task analysis|C0556033|||||1|0.0059|  
CT|BEHAVIOR THER COGNITIVE;COGNITIVE BEHAVIOR THER;THER COGNITIVE  
BEHAVIOR|||C0009244|MSH|||  
CT|Behavior Therapies, Cognitive;Behavior Therapy, Cognitive;Cognitive -  
behavior therapy;Cognitive - behaviour therapy;Cognitive Behavior  
Therapies;Cognitive Behavior Therapy;Cognitive-behaviour therapy;Therapies,  
Cognitive Behavior;Therapy, Cognitive Behavior;behaviour cognitive  
therapy;cognitive behavior therapy;cognitive behaviour therapy;therapy behavior  
cognitive;CBT - Cognitive - behavior therapy;CBT - Cognitive - behaviour  
therapy;Cognition Therapies;Cognition Therapy;Therapies, Cognition;Therapy,  
Cognition;Cognitive Psychotherapies;Cognitive Psychotherapy;Psychotherapies,  
Cognitive;Psychotherapy - cognitive;Psychotherapy, Cognitive;cognitive  
psychotherapy;Cognitive Therapies;Cognitive Therapy;Cognitive therapy;Therapies,  
Cognitive;Therapy, Cognitive;cognitive therapies;cognitive therapy;therapy  
cognitive;Cognitive and behavioral therapy;Cognitive and behavioural  
therapy;behavioral cognitive therapy;cognitive and behavioral therapy;cognitive  
behavioral therapy;cognitive behavioural therapy;Cognitive approach;Cognitive  
therapy approach;Cognitive-behavioral therapy approach;Cognitive-behavioural  
therapy approach;cognitive behavior  
modification|C0009244|||C0009244|AOD;CHV;CSP;MSH;MTH;NCI;SNOMEDCT|1|0.0027|1  
CT|C-terminal|C1707271|||||1|0.0004|  
CT|C.A.T. scan NOS;c a t scan;c.a.t. scan;CAT - Computerised axial  
tomography;CAT - Computerized axial tomography;CAT Scan, X Ray;CAT Scan, X-  
Ray;CAT Scans, X-Ray;Scan, X-Ray CAT;Scans, X-Ray CAT;X-Ray CAT Scan;X-Ray CAT  
Scans;CAT scan - NOS (procedure);cat procedure scan;cat scan procedure;CT -  
Computerised tomography;CT - Computerized tomography;CT Scan, X Ray;CT Scan, X-  
Ray;CT Scans, X-Ray;Scan, X-Ray CT;Scans, X-Ray CT;X-Ray CT Scan;X-Ray CT  
Scans;CT X Ray;CT X Rays;CT XRAY;X Ray, CT;X Rays, CT;CT scan without IV  
contrast;Computed Tomography, Transmission;Tomography, Transmission  
Computed;Transmission Computed Tomography;Computed Tomography, X Ray;Computed  
Tomography, X-Ray;Computed Tomography, Xray;Computed X Ray Tomography;Computed  
X-Ray Tomography;Tomographies, Computed X-Ray;Tomography, Computed X-  
Ray;Tomography, X Ray Computed;Tomography, X-Ray Computed;Tomography, Xray  
Computed;X Ray Tomography, Computed;X-Ray Computed Tomography;X-Ray Tomography,  
Computed;Xray Computed Tomography;computed tomography x rays;computed x-ray  
tomography;x-ray computed tomography;Computed axial tomography;computed axial  
tomography;Computerised axial tomography;Computerized Axial  
Tomography;Computerized axial tomography;Computerized axial tomography,  
NOS;computerized axial tomography;Computerised tomograph scan;Computerized  
tomograph scan;Computerised tomography;Computerized Tomography;Computerized  
tomography;computerised tomography;computerized tomography;Computerised  
transaxial tomography;Computerized transaxial tomography;Computerized transaxial  
tomography, NOS;Computerized Tomography, X Ray;Computerized Tomography, X-  
Ray;Tomography, X Ray Computerized;Tomography, X-Ray Computerized;X Ray  
Computerized Tomography;X-Ray Computerized Tomography;Computerized tomography  
without IV contrast;Computerized transaxial tomography without IV

contrast;Tomodensitometry;tomodensitometry;Tomography, X Ray Computer Assisted;Tomography, X-Ray Computer Assisted;X Ray Computer Assisted Tomography;X-Ray Computer Assisted Tomography;assisted computer tomography;computer assisted tomography;ctt|C0040405||C0040405|AOD;CHV;CSP;HL7V3.0;MSH;MTH;MTHICD9;NCI;SNOME DCT|1|0.0935|1  
CT|CAF|||C0007673|NCI|||  
CT|CALC1;CALCA|C1367551;C1705783||C1367551;C1705783|HUGO;NCI;OMIM|||  
CT|CALCA Gene;CALCA gene|C1367551||C1367551|HUGO;MTH;NCI|||  
CT|CALCA wt Allele;CGRP-I;CGRP1|C1705783||C1705783|MTH;NCI|||  
CT|CALCITONIN;calcitonin|C0006668;C0770558;C1704385;C2825090||C0006668;C0201924 ;C0770558;C1367551;C1704385;C2825090|AOD;CHV;CSP;FMA;HUGO;LCH;LNC;MSH;MTH;NCI;ND FRT;OMIM;PDQ;SNOMEDCT;VANDF|||1  
CT|CALCITONIN GENE-RELATED PEPTIDE|C0006669;C1367551||C1367551|OMIM|||  
CT|CALCITONIN/CALCITONIN-RELATED POLYPEPTIDE, ALPHA|||C1367551|OMIM|||  
CT|CAT;catting|C0007450;C0040405;C0325089;C0325090;C0524517||C0040405|AOD;CHV;N CI|||  
CT|CAT Scan;CAT Scans;CAT scan;CAT scan - NOS;CAT scan, NOS;cat scanning;cat scans;cats scan;scan cat;CT SCAN;CT Scans;CT scan;CT scans;ct scanning;scan ct|C0040405;C1547980||C0040405|AOD;CHV;CSP;MEDLINEPLUS;NCI;SNOMEDCT|||  
CT|CBT|C0009244;C1412770||C0009244|CSP;NCI|||  
CT|CENTRAL AFRICAN REPUBLIC;Central African Republic;Ubangi-Shari|C0007673||C0007673|AOD;LCH;MSH;MTH;NCI;SNOMEDCT|||  
CT|CF|||C0007673|NCI|||  
CT|CGRP|||C1367551;C1705783|NCI;OMIM|||  
CT|CHOLINE-PHOSPHATE CYTIDYLYLTRANSFERASE;CYTIDYLYLTRANSFERASE, CTP-PHOSPHOCHOLINE|C0311989;C1418396||C1418396|OMIM|||  
CT|COGNITION THER;THER COGNITION|||C0009244|MSH|||  
CT|COGNITIVE PSYCHOTHER;PSYCHOTHER COGNITIVE|||C0009244|MSH|||  
CT|COGNITIVE THER;THER COGNITIVE|||C0009244|MSH|||  
CT|CONTRA|||C0079164|MSH|||  
CT|CT|||C0007673;C0009244;C0009778;C0010377;C0040405;C0079164;C1367551;C1418396 ;C1705783|HUGO;LNC;MSH;NCI;OMIM;PDQ|||  
CT|CTPCT;PCYT1;PCYT1A;PCYT1A gene;PHOSPHATE CYTIDYLYLTRANSFERASE 1, CHOLINE;PHOSPHATE CYTIDYLYLTRANSFERASE 1, CHOLINE, ALPHA ISOFORM;phosphate cytidylyltransferase 1, choline, alpha isoform;phosphate cytidylyltransferase 1, choline, alpha|C1418396||C1418396|HUGO;MTH;OMIM|||  
CT|Calcitonin/Calcitonin-Related Polypeptide, Alpha Gene|||C1367551|NCI|||  
CT|Calcitonin/Calcitonin-Related Polypeptide, Alpha wt Allele|||C1705783|NCI|||  
CT|Cardiac transplantation;cardiac transplantation|C0018823||C0018823|CHV;MSH;NCI|1|0.0004|  
CT|Catalase;catalase|C0007367;C1413138||C0007367;C1413138|AOD;CHV;CSP;HUGO;LCH; LNC;MSH;MTH;NCI;NDFRT;OMIM;RXNORM;SNOMEDCT;VANDF|1|0.0004|  
CT|Category Test|C0589061|||1|  
CT|Central African Republic (geographic location)|||C0007673|SNOMEDCT|||  
CT|Cerebral toxoplasmosis;cerebral toxoplasmosis|C0085315||C0085315|CHV;MSH;NDFRT;SNOMEDCT|1|0.0003|  
CT|Chlamydia trachomatis|C0008151|||1|0.0075|1  
CT|Cholera enterotoxin|C0116227|||1|0.0013|  
CT|Cognitive - behavior therapy (procedure)|||C0009244|SNOMEDCT|||  
CT|Cognitive - behavior therapy (regime/therapy);Cognitive - behaviour therapy (regime/therapy)|||C0009244|SNOMEDCT|||  
CT|Cognitive and behavioral therapy (procedure)|||C0009244|SNOMEDCT|||  
CT|Cognitive and behavioral therapy (regime/therapy)|||C0009244|SNOMEDCT|||  
CT|Cognitive therapy (procedure)|||C0009244|SNOMEDCT|||  
CT|Cognitive therapy (regime/therapy)|||C0009244|SNOMEDCT|||

CT|Computed Tomography;Computed tomography;computed tomography;computing tomography;tomography, computed|C0040405;C1552357|1|0.998|C0040405;C1552357|CHV;HL7V2.5;HL7V3.0;NCI;PDQ;SNOMEDCT|1|0.6452|1  
CT|Computed tomographic scan;Computed tomographic scanning|||||1|0.0013|  
CT|Computed tomography (procedure)|||C0040405|SNOMEDCT|||  
CT|Computed tomography scan - NOS;computed tomography scan;computed tomography scanning|||C0040405|SNOMEDCT|1|0.0013|  
CT|Computed tomography scan - NOS (procedure)|||C0040405|SNOMEDCT|||  
CT|Computer-Tomography;computertomography|||||1|0.0007|  
CT|Computerized axial tomography scan - NOS;Computerized axial tomography scan - NOS|||C0040405|SNOMEDCT|||  
CT|Computerized axial tomography (procedure)|||C0040405|SNOMEDCT|||  
CT|Computerized axial tomography scan - NOS (procedure)|||C0040405|SNOMEDCT|||  
CT|Connecticut;connecticut|C0009778|||C0009778|AOD;CHV;LCH;MSH;MTH;NCI;SNOMEDCT|1|0.0004|  
CT|Connecticut (geographic location)|||C0009778|SNOMEDCT|||  
CT|Coombs test|C0009961|||||1|  
CT|Crotoxin;crotoxin|C0010377|||C0010377|MSH;MTH;NCI;NDFRT;PDQ|||  
CT|Crotoxin [Chemical/Ingredient]||||C0010377|NDFRT|||  
CT|EMI scan;emi scan|||C0040405|CHV;CSP|||  
CT|KC|C0022575;C1705783|||C1705783|NCI|||  
CT|Psychotherapy - cognitive (procedure)|||C0009244|SNOMEDCT|||  
CT|Psychotherapy - cognitive (regime/therapy)|||C0009244|SNOMEDCT|||  
CT|TOMOGRAPHY TRANSM COMPUTED|||C0040405|MSH|||  
CT|alone|C0205171;C0439044;C0679994|||||1|0.0003|  
CT|alpha-chymotrypsin|C0764105|||||1|0.0005|  
CT|calcitonin-related polypeptide alpha||||C1367551|HUGO|||  
CT|calf tenderness|C0238883|||||1|  
CT|calf testis|||||1|  
CT|calf thymus|||||1|0.0017|  
CT|cancer/testis|C0153594|||||1|0.0028|  
CT|carbon tetrachloride|C0007022|||C0007022|AOD;CHV;CSP;LCH;LNC;MSH;MTH;NCI;NDFRT;SNOMEDCT|1|0.0017|  
CT|carboxyl terminal;carboxyl-terminal|||||1|0.0007|1  
CT|carboxyl terminus|||||1|0.0003|  
CT|carcinoid tumor|C0007095|||C0007095|CHV;MSH;MTH;NCI;NDFRT;SNOMEDCT|||  
CT|cardiac tamponade|C0007177|||C0007177|AOD;CHV;COSTAR;CST;ICD9CM;LCH;MSH;NCI;NDFRT;QMR;SNOMEDCT|1|0.0004|1  
CT|cardiothoracic||1|0.002|||||1  
CT|carotid tracing|||||1|  
CT|carpal tunnel|C0007286;C0225091;C1269543|||||1|  
CT|cationic trypsinogen|C1418965|||||1|  
CT|celiac trunk|C0007569|||C0007569|CHV;FMA;SNOMEDCT;UWDA|1|0.0003|  
CT|cell therapy|C0302189|||||1|  
CT|cellulose triacetate|C0055048|||C0055048|MSH|1|0.0003|1  
CT|census tract|C1317843;C1547690|||||1|  
CT|center thickness|||||1|  
CT|central tendon|C0230162|||||1|0.0002|  
CT|cerebral thrombosis|C0079102;C0795687|||||1|  
CT|cerebral tumor|C1263885|||||1|  
CT|cervical traction|C0556664|||||1|  
CT|cervicothoracic|C0450195|||||1|  
CT|charge transport|||||1|0.0003|  
CT|charge-transfer|||||1|0.0044|

CT|chemotaxis|C0008018|||||1  
CT|chemotherapy|C0013216;C0013217;C0392920|||C0013216;C0013217;C0392920|AOD;CCS;  
CHV;CSP;LCH;LNC;MEDLINEPLUS;MSH;NCI;PDQ;SNOMEDCT|||1  
CT|chest  
tube|C0008034|||C0008034;C1549530;C1550230|CHV;HL7V2.5;LNC;MSH|1|0.0003|1  
CT|chlamydia|C0008148|||||1|0.0003|  
CT|chloramine-T|C0055332|||||1|0.0011|  
CT|cholera toxin|C0008356|||C0008356|CHV;CSP;MSH;NCI;NDFRT;SNOMEDCT|1|0.0346|1  
CT|cholesterol, total|C0543421;C1445957|||||1  
CT|chorda  
tympani|C0008483;C1269597|||C0008483;C1269597|CSP;FMA;SNOMEDCT;UWDA|1|0.0035|  
CT|chorda tympani nerve|C0008483|||||1|0.0009|  
CT|chordae tendineae|C0008484;C1305731|||||1  
CT|chronic  
thyroiditis|C0242520;C0677607;C2936918|||C0242520;C0677607|CHV;COSTAR;MTH;SNOMED  
CT|||1  
CT|chronic tonsillitis|C0149517|||C0149517|CHV;ICD9CM;SNOMEDCT|1|0.0004|  
CT|chymotrypsin|C0008742|||C0008742|AOD;CHV;CSP;LCH;LNC;MSH;MTH;NCI;NDFRT;RXNORM  
;SNOMEDCT;VANDF|1|0.0005|1  
CT|circadian time|||||1|0.0037|  
CT|circulation time|||||1  
CT|classic technique|||||1  
CT|clinical  
trial|C0008976;C1096775|||C0008976;C1096775;C1552009|AOD;CHV;CSP;HL7V2.5;HL7V3.0  
;MSH;NCI|1|0.0004|  
CT|closed thoracotomy|||||1  
CT|closure time|||||1|0.001|  
CT|clotting time;coagulation time|C0368930|||C0368930|CHV;LNC|||1  
CT|coal  
tar|C0009137|||C0009137|CHV;MSH;MTH;MTHSPL;NCI;NDFRT;RXNORM;SNOMEDCT;VANDF|||  
CT|coated tablet|C1273642|||||1  
CT|cobra toxin|||||1  
CT|coil test|||||1  
CT|collecting  
tubule|C0022675;C1280366|||C0022675;C1280366|CHV;SNOMEDCT;UWDA|1|0.0005|1  
CT|combined tumor|||||1  
CT|compliance|C0009563;C1321605|||||1|0.0008|  
CT|compressed tablet|||||1  
CT|computed tomogram|||||1|0.0036|  
CT|computed tomograph|||||1|0.0008|  
CT|computed tomographic|||||1|0.1414|  
CT|computed tomography|||||1|0.0003|  
CT|computerized tomogram|||||1|0.0009|  
CT|computerized tomograph|||||1|0.0003|  
CT|computerized tomographic|||||1|0.0128|  
CT|concentration|C0086045;C1446561|||||1|0.0006|  
CT|concentration-time product|||||1  
CT|condensed tannin;condensed  
tannins|C0072018;C0919289|||C0072018;C0919289|MSH;NCI;NDFRT|1|0.0007|  
CT|conduction time|||||1|0.0011|  
CT|congenital Toxoplasmosis;congenital  
toxoplasmosis|C0040560|||C0040560|CHV;MSH;MTHICD9;NCI;NDFRT;SNOMEDCT|1|0.0003|  
CT|connective  
tissue|C0009780|||C0009780|AOD;CHV;CSP;FMA;MSH;MTH;NCI;SNOMEDCT;UWDA|1|0.0013|1  
CT|conservative treatment|||||1|0.0006|  
CT|continue treatment|||||1  
CT|continuous-flow tub|||||1

CT|contraction time|||||||1  
CT|contraindications;contraindications  
aspect;counterindications|C0079164|||C0079164|MSH;MTH|||  
CT|control|C0009932;C0243148;C1550141;C1882979;C2587213|||C0009932;C0243148;C030  
8718;C1547100;C1550141;C1882979;C2587213|CHV;HL7V2.5;LCH;LNC;MSH;NCI;SNOMEDCT|1|  
0.001|  
CT|control diet|||||1|0.0004|  
CT|control group|C0009932|||||1|0.0002|  
CT|controlled temperature|C0449862|||||||1  
CT|conventional therapy|C0087111|||C0087111|NCI|||  
CT|conventional  
treatment|C0087111;C2945704|||C0087111;C2945704|CHV;NCI|1|0.0003|  
CT|core temperature|||||1|0.0005|  
CT|corneal thickness|C0429493|||C0429493|CHV;SNOMEDCT|1|0.0007|1  
CT|corneal transplant|C0010042|||||||1  
CT|coronary thrombosis|C0010072|||||||1  
CT|corrected transposition|C0332941|||||||1  
CT|correctional transfer|||||||1  
CT|corrective therapy|||||||1  
CT|cortical thickness|||||1|0.0003|1  
CT|corticosterone|C0010124|||C0010124;C0373588|AOD;CHV;CSP;LCH;LNC;MSH;MTH;NCI;N  
DFRT;SNOMEDCT|1|0.0005|  
CT|corticothalamic|||||1|0.0006|  
CT|cough threshold|||||||1  
CT|counseling and testing|||||1|0.0004|  
CT|count|C0750480;C1705566|||||||1  
CT|countertransference|C0010219|||C0010219|AOD;CHV;MSH;SNOMEDCT|||  
CT|countertransport|||||1|0.0005|  
CT|cover test|C0278241;C0444883|||||||1  
CT|crest time|||||||1  
CT|cricothyroid|C0224178|||C0224178|CHV;FMA;UWDA|1|0.002|  
CT|cricothyroid  
muscle|C0224178;C1280271|||C0224178;C1280271|CHV;FMA;MSH;NCI;SNOMEDCT;UWDA|1|0.0  
005|  
CT|crista  
terminalis|C0225852;C1305795|||C0225852;C1305795|FMA;SNOMEDCT;UWDA|1|0.0014|  
CT|critical thinking|||||1|0.0004|  
CT|crutch training|||||||1  
CT|ctt scan||||C0040405|CHV|||  
CT|curly tail|||||1|0.0007|  
CT|cycle threshold;threshold cycle|||||1|0.0011|  
CT|cystine-tellurite|||||||1  
CT|cytidyltransferase|C1333192|||C1333192|NCI|||  
CT|cytoplasmic domain;cytoplasmic tail|C1511625|||C1511625|NCI|1|0.0017|  
CT|cytotechnology|C1552390|||||||1  
CT|cytotoxic|C0677881;C1511636|||C0677881;C1511636|MTH;NCI|||  
CT|cytotoxic therapy|C0677881|||||||1  
CT|cytotrophoblast|C0230960;C1281788|||C0230960;C1281788|CHV;FMA;MSH;NCI;SNOMEDC  
T|1|0.0007|  
CT|tomography|C0040395;C0040405|||C0040405|NCI|1|0.001|  
CT|training|C0040607;C0220931;C2673163|||||1|0.0008|  
CT|twitch contraction time|||||1|0.0004|  
CVA|ACCIDENT CEREBROVASCULAR;Accident - cerebrovascular;CEREBROVASCULAR  
ACCIDENT;Cerebrovascular Accident;Cerebrovascular Accidents;Cerebrovascular  
accident;Cerebrovascular accident, NOS;cerebrovascular accident;cerebrovascular  
accidents;APOPLEXY;Apoplexy;Apoplexy, NOS;apoplexy;APOPLEXY, CEREBRAL;Cerebral  
apoplexy;Cerebral apoplexy, NOS;Apoplexy, Cerebrovascular;Cerebrovascular

Apoplexy;Brain Attack;Brain attack;Brain Vascular Accident;Brain Vascular Accidents;Vascular Accident, Brain;Vascular Accidents, Brain;vascular brain accident;CEREBRAL VASCULAR ACCIDENT;cerebral vascular accident;cerebral vascular accidents;vascular cerebral accident;CEREBROVASCULAR ACCIDENT, (CVA);CVA (Cerebrovascular Accident);CVA - Cerebrovascular accident;CVA, CEREBROVASCULAR ACCIDENT;CVAs (Cerebrovascular Accident);Cerebral Stroke;Cerebral Strokes;Stroke, Cerebral;Strokes, Cerebral;cerebral stroke;stroke cerebral;Cerebrovascular Stroke;Cerebrovascular Strokes;Stroke, Cerebrovascular;Strokes, Cerebrovascular;cerebrovascular stroke;STROKE;Stroke;Stroke NOS;Stroke, NOS;Strokes;stroke;strokes|C0038454|1|0.556|C0038454|AOD;CHV;COSTAR;CSP;CST;DXP;LNC;MEDLINEPLUS;MSH;MTH;NCI;NDFRT;OMIM;SNOMEDCT|1|0.8487|1  
CVA|ACO|||C0054889|NCI;PDQ|||  
CVA|Acute ill-defined cerebrovascular disease;Acute ill-defined cerebrovascular disease, NOS|C0001365|||C0001365|MTH;SNOMEDCT|||  
CVA|Acute ill-defined cerebrovascular disease (disorder)|||C0001365|SNOMEDCT|||  
CVA|Acute, but ill-defined cerebrovascular disease|||C0001365|ICD9CM|||  
CVA|CAV|||C0054889|PDQ|||  
CVA|CAV chemotherapy protocol;CAV protocol;VADRC;cyclophosphamide/doxorubicin/vincristine protocol|C0054889|||C0054889|CHV;MSH;MTH;NCI;PDQ|||  
CVA|CDV|||C0054889|NCI;PDQ|||  
CVA|CEREBRAL INFARCTION|C0007785;C0038454|||C0038454|OMIM|||  
CVA|CHO|||C0054889|NCI;PDQ|||  
CVA|CTX/DOX/VCR|||C0054889|NCI;PDQ|||  
CVA|CVA;CVA, NOS;Cva;VA-C|C0038454;C0054889|||C0001365;C0038454;C0054889|CHV;CST;DXP;ICD9CM;NCI;PDQ;SNOMEDCT|||  
CVA|CVA (cerebral vascular accident)|||C0038454|CSP|||  
CVA|CVA - Cerebrovascular accident unspecified|||C0038454|SNOMEDCT|||  
CVA|CVA - cerebrovascular accident (& unspecified [& stroke])|||C0038454|SNOMEDCT|||  
CVA|CVA - cerebrovascular accident (& unspecified [& stroke]) (disorder)|||C0038454|SNOMEDCT|||  
CVA|CVA unspecified|||C0038454|SNOMEDCT|||  
CVA|Cerebrovascular accident (disorder)|||C0038454|SNOMEDCT|||  
CVA|Cerebrovascular accident (disorder) [Ambiguous]|||C0038454|SNOMEDCT|||  
CVA|Clavulanic acid|C0055860|||1|0.0364|  
CVA|Cough variant asthma;cough variant asthma|C0694548|||C0694548|CHV;ICD9CM;SNOMEDCT|1|0.0616|1  
CVA|Cyclophosphamide/Doxorubicin/Vincristine;cyclophosphamide/doxorubicin/vincristine|||C0054889|NCI;PDQ|||  
CVA|OCA|C1015366|||C0054889|NCI;PDQ|||  
CVA|STROKE SYNDROME;SYNDROME, STROKE;Stroke Syndrome|C0038454;C1263853|||C0038454|NCI|||  
CVA|Stroke NOS (disorder)|||C0038454|SNOMEDCT|||  
CVA|Stroke [Disease/Finding]|||C0038454|NDFRT|||  
CVA|Stroke and cerebrovascular accident unspecified|||C0038454|SNOMEDCT|||  
CVA|Stroke and cerebrovascular accident unspecified (disorder)|||C0038454|SNOMEDCT|||  
CVA|Stroke unspecified|||C0038454|SNOMEDCT|||  
CVA|Stroke/CVA - undefined|||C0038454|SNOMEDCT|||  
CVA|Stroke/cerebrovasc accident|||C0038454|ICPC|||  
CVA|Stroke/cerebrovascular accident|||C0038454|ICPC|||  
CVA|VAC|||C0054889|NCI;PDQ|||  
CVA|canonical variate analysis|||1|0.0224|  
CVA|cardiovascular accident|||1|1

CVA|cerebrovascular disease|C0007820|||||1|0.0308|  
CVA|cerivastatin|C0528023|||C0528023|CHV;MSH;NCI;NDFRT;SNOMEDCT;VANDF|||  
CVA|cervicovaginal antibody|||||||1  
CVA|chronic villous arthritis|||||||1  
CVA|corrected visual acuity|C1275680|||C1275680|CHV;SNOMEDCT|||  
CVA|costovertebral angle||1|0.444|||||1  
CVA|cresyl violet acetate|C0056485|||||||1  
CVI|Cape Verde Islands|C0006893|||||1|0.0146|  
CVI|Children's Vaccine Initiative|||||||1|0.0521|1  
CVI|Chronic Venous Insufficiency;chronic venous  
insufficiency|C1306557|||||1|0.5521|1  
CVI|cardiovascular incident|||||||1  
CVI|cardiovascular insufficiency|||||||1  
CVI|cerebrovascular incident|||||||1  
CVI|cerebrovascular infarct||1|1.000|||||1  
CVI|cerebrovascular infarction|||||||1  
CVI|cerebrovascular insufficiency|C0241832|||||||1  
CVI|common variable immunodeficiency|C0009447|||||1|0.2604|1  
CVI|content validity index|||||||1|0.0313|  
CVI|continuous intravenous infusion|C1511497|||||1|0.0125|  
CVI|continuous venous infusion|||||||1|0.0104|1  
CVI|cortical visual impairment|C1531862|||||||1  
CVI|cyclic variation index|||||||1|0.0208|  
CVI|visual impairment|C0042798|||||1|0.0458|  
CVP|CDDP/CTX/VP-16|||C0280556|NCI;PDQ|||  
CVP|CEP|||C0280556|PDQ|||  
CVP|COP|C0086825|||C0056633|PDQ|||  
CVP|COP chemotherapy protocol 2;COP protocol 2;CVP regimen;CVP  
regimen;Cyclophosphamide-Vincristine-Prednisone  
Regimen;cyclophosphamide/prednisone/vincristine  
protocol|C0056633|||C0056633|CHV;MSH;MTH;NCI|||  
CVP|CTX/PRED/VCR|||C0056633|NCI;PDQ|||  
CVP|CVP|C0056633;C0280556|||C0056633;C0280556|NCI;PDQ|||  
CVP|Cisplatin/Cyclophosphamide/Etoposide;cisplatin/cyclophosphamide/etoposide|||  
|C0280556|NCI;PDQ|||  
CVP|Cyclophosphamide/Prednisone/Vincristine;cyclophosphamide, vincristine,  
prednisone;cyclophosphamide/prednisone/vincristine||1|0.124|C0056633|NCI;PDQ|||  
CVP|PCE|C0246101;C0280556;C1588205|||C0280556|NCI;PDQ|||  
CVP|PVC|C0151636|||C0280556|NCI;PDQ|||  
CVP|VCP|C0056633;C1421437|||C0056633|NCI;PDQ|||  
CVP|VCP-1;cisplatin/cyclophosphamide/etoposide  
protocol|C0280556|||C0280556|MTH;NCI;PDQ|||  
CVP|cardiac valve procedure|||||||1  
CVP|cardiovascular pulmonary||1|0.004|||||  
CVP|cardioventricular pacing|||||||1  
CVP|cell volume profile|||||||1  
CVP|central venous|C0444466|||||1|0.0305|  
CVP|central venous  
pressure|C0428640;C1321771|1|0.872|C0428640;C1321771|CHV;LCH;MSH;MTH;SNOMEDCT|1|  
0.9523|1  
CVP|cerebrovascular profile|||||||1  
CVP|chlorphenvinphos|C0008195|||||1|0.0172|  
CVP|cyclophosphamide, prednisone, and vincristine chemotherapy  
protocol|||C0056633|CHV|||  
CV|C-  
V;CV|C1547550;C2699739|||C0006893;C0280551;C0681921;C1547550;C1880201;C2699739|N  
CI;PDQ|||

CV|CAPE VERDE;Cape Verde;cape verde;Cape Verde islands;Republic of Cape Verde|C0006893|||C0006893|CHV;MSH;MTH;NCI;SNOMEDCT|||  
CV|CPV|C0006893;C0056285|||C0006893|NCI|||  
CV|CTX/VP-16|||C0280551|NCI;PDQ|||  
CV|CTX/VP-16 chemotherapy protocol|||C0280551|CHV|||  
CV|Cape Verde islands (geographic location)|||C0006893|SNOMEDCT|||  
CV|Chiba norovirus||1|0.002|||  
CV|Cibus Vespertinus (dinner)|||C2699739|HL7V2.5|||  
CV|Circularvection|||1|0.0029|  
CV|Coefficient of Variance;coefficient of variance;Coefficient of Variation;coefficient of variation|C0681921|||C0681921|AOD;CHV;MTH;NCI|1|0.6133|1  
CV|Cross-validation|C0681935|||1|0.0042|  
CV|Crystal Violet;crystal violet|C0017440|||1|0.0086|1  
CV|Curriculum Vitae;curriculum vitae|C1880201|||C1880201|MTH;NCI|1|0.0035|1  
CV|Cyclophosphamide/Etoposide;cyclophosphamide/etoposide|||C0280551|NCI;PDQ|||  
CV|Dinner;Supper;cibus vespertinus|C2699739|||C2699739|MTH;NCI|||  
CV|Resume|C1550028;C1880201|||C1880201|NCI|||  
CV|SPL DEA Schedule V;Schedule V;Schedule V Controlled Substance;Schedule V Substance|C1547550|||C1547550|HL7V2.5;MTH;NCI|||  
CV|VC|||C0280551|PDQ|||  
CV|cardiac volume|C0007179|||1|  
CV|cardiovascular|C0007226|1|0.958|C0007226|LNC;NCI;OMIM|1|0.1388|1  
CV|care vigilance|||1|  
CV|carotenoid vesicle|C2248600|||1|  
CV|cell volume|C0596292|||1|  
CV|central venous|C0444466|1|0.006||1|0.007|1  
CV|cerebrovascular|C1880018|||1|  
CV|cervical vertebra|C0728985;C1269049|||1|  
CV|chorionic villi;chorionic villus|C0008508|||1|0.0154|  
CV|closed vitrectomy|||1|  
CV|closing volume|C0009050|||1|0.0227|1  
CV|coated vesicles|C0242915|||1|0.0029|  
CV|coefficient of variability|||1|0.0038|  
CV|collateralizing vessel|||1|  
CV|collecting vein|||1|  
CV|color vision|C0086032|||1|  
CV|coma vigil|C0001889|||1|  
CV|common ventricle|C0152424|||1|  
CV|concentrated volume|||1|  
CV|conceptional vessel|||1|  
CV|conducting vein|||1|  
CV|conduction velocity|C0234084|||1|0.0685|1  
CV|consonant vowel|||1|  
CV|contingent valuation|||1|0.0096|  
CV|contrast venography|||1|0.0035|  
CV|contrast ventriculography|||1|0.0035|1  
CV|conventional ventilation|||1|0.0195|1  
CV|conversational voice|||1|  
CV|corpuscular volume||1|0.006||1|  
CV|costovertebral||1|0.018||1|  
CV|cowpox virus|C0010233|||1|0.0016|  
CV|craniosacral vault|||1|  
CV|cresyl violet|C0056484|||1|  
CV|critical value|||1|  
CV|cutaneous vasculitis|C0262988|||1|  
CV|cyclic voltammetry|||1|0.0528|

CV|cyclophosphamide and etoposide chemotherapy protocol||||C0280551|CHV|||  
CV|cyclophosphamide/etoposide protocol||||C0280551|MTH|||  
CV|dichotic consonant-vowel|||||1|0.0051|  
CV|electrical cardioversion|C0013778;C0542380|||||1|0.0022|  
CV|true conjugate|C0923003|||||1|  
CV|vaccine|C0042210;C1552558|||||1|0.0032|  
CV|value|C1522609|||||1|0.0029|  
CV|vasculitis|C0042384;C1963274|||||1|0.0029|  
CV|venous compliance|||||1|0.0016|  
CVS|Biopsies, Chorionic Villi;Biopsy, Chorionic Villi;Chorionic Villi  
Biopsies;Chorionic Villi Biopsy;chorionic villi biopsy;CVB - Chorionic villus  
biopsy;CVS - Chorionic villus sampling;chorionic villus sampling (CVS);Chorionic  
Villi Sampling;Chorionic Villus Sampling;Chorionic villus sampling;Sampling of  
chorionic villus;Sampling, Chorionic Villi;Sampling, Chorionic Villus;chorionic  
villi sampling;chorionic villus samples;chorionic villus sampling;Chorionic  
Villi Samplings;Chorionic Villus Samplings;Samplings, Chorionic Villi;Samplings,  
Chorionic  
Villus|C0008509|1|0.914|C0008509|AOD;CHV;CSP;MEDLINEPLUS;MSH;MTH;MTHICD9;NCI;SNO  
MEDCT|1|0.4606|1  
CVS|CORONAVIRUS 229E SUSCEPTIBILITY|C1852539|||C1852539|MTH;OMIM|||  
CVS|CVS|||C0008509;C0152164;C1852539|CSP;LNC;OMIM|||  
CVS|CYCLIC VOMITING SYNDROME;Cyclic vomiting syndrome;cyclic vomiting  
syndrome|C0152164;C2700509|||C0152164|MSH;OMIM|1|0.0343|1  
CVS|Challenge virus standard|||||1|0.0263|  
CVS|Coated vesicles|C0242915|||||1|0.0183|  
CVS|Cyclical vomiting;Cyclical vomiting NOS;cyclical vomiting;Cyclical vomiting  
NOS (disorder);cyclical vomiting disorder;Cyclical vomiting syndrome;cyclical  
vomiting syndrome;vomiting syndrome cyclical;Cyclical vomiting syndrome  
(disorder);Familial cyclic vomiting syndrome;Periodic vomiting;periodic  
vomiting|C0152164|||C0152164|CHV;MSH;MTH;MTHICD9;SNOMEDCT|||  
CVS|HCVS;HUMAN CORONAVIRUS SENSITIVITY|C1415503;C1852539|||C1852539|OMIM|||  
CVS|Sampling of chorionic villus (procedure)|||C0008509|SNOMEDCT|||  
CVS|cardiovascular surgery|C0038897|||||1|  
CVS|cardiovascular system|C0007226;C1269562|1|0.082|||1|0.0366|1  
CVS|centrifugal visual system|||||1|0.0103|  
CVS|cerebral vasospasm|C0265110|||||1|0.0137|1  
CVS|cervicovaginal secretions|||||1|0.0137|  
CVS|challenge virus strain|||||1|  
CVS|chronic variable stress|||||1|0.0137|  
CVS|clathrin-coated vesicles|C0887885|||||1|0.0091|  
CVS|clean-voided specimen|||||1|  
CVS|coefficients of variation|||||1|0.3326|  
CVS|collagen vascular sealing|||||1|  
CVS|computer vision syndrome|||||1|  
CVS|conduction velocities|C0234084|||||1|0.0309|  
CVS|continuing vegetative state|||||1|  
CVS|coronavirus susceptibility|||||1|  
CVS|current vital signs|||||1|  
CVS|customer, value, service||1|0.004|||1|  
CVS|cyclical syndrome vomiting|||C0152164|CHV|||  
CVS|cyclical vomiting|||C0152164|CHV|||  
CXR|CHRISTMAS ISLAND;Christmas Island;Canton and Enderbury  
Islands|C0006888|||C0006888|MSH;MTH;NCI|||  
CXR|CX|||C0006888|NCI|||  
CXR|CXR;cxr|C0006888;C0039985|||C0006888;C0039985|CHV;NCI|||  
CXR|CXR - Chest X-ray;Chest Radiography;Radiography of chest;Radiography of  
chest, NOS;chest radiography;Chest exclusion X-ray;Plain chest X-

ray;Radiographies, Thoracic;Radiography, Thoracic;Thoracic  
Radiographies;Thoracic Radiography;thoracic radiography;Radiologic examination  
of chest;Radiologic examination of chest, NOS;Thoracic cage X-ray;X-ray thoracic  
cage NOS;thoracic x rays;thoracic x-ray;thorax x-  
ray|C0039985|||C0039985|AOD;CHV;CSP;MSH;MTH;NCI;SNOMEDCT|1|0.1794|  
CXR|Chest X-ray;Chest x-ray;Chest x-ray, NOS;X-ray of chest NOS;chest X  
ray;chest X-ray;chest x ray;chest x rays;chest x-  
ray|C0039985;C1114557|1|1|C0039985|CHV;CSP;MTH;MTHICD9;NCI;SNOMEDCT|1|0.4466|1  
CXR|Christmas Island (Australia)|||C0006888|MSH|||  
CXR|KT|C1690540|||C0006888|NCI|||  
CXR|Plain chest X-ray (procedure)|||C0039985|SNOMEDCT|||  
CXR|RADIOGR THORACIC;THORACIC RADIOGR|||C0039985|MSH|||  
CXR|Radiographic procedure on chest|||C0039985|SNOMEDCT|||  
CXR|Radiographic procedure on chest (procedure)|||C0039985|SNOMEDCT|||  
CXR|Radiography of chest (procedure)|||C0039985|SNOMEDCT|||  
CXR|Thoracic cage X-ray (procedure);X-ray thoracic cage NOS  
(procedure)|||C0039985|SNOMEDCT|||  
CXR|chest radiograph|||1|0.3206|  
CXR|chest roentgenogram|||1|0.0534|  
D&C|CURETTAGE DILATATION;Curettage and Dilatation;DILATATION  
CURETTAGE;Dilatation & Curettage;Dilatation and Curettage;Dilatation and  
curettage;Dilatation and curettage NOS;curettage dilatation;dilatation and  
curettage;dilatation curettage;D&C - Dilatation and curettage;DILATION AND  
CURETTAGE;Dilation and Curettage;Dilation and curettage;Dilation and curettage,  
NOS;curettage dilation;dilation and curettage;dilation curettage;Uterine  
endometrectomy;curettage dilatation uterus;uterus d  
c|C0012358|1|0.982|C0012358|AOD;CHV;COSTAR;MSH;MTH;MTHICD9;NCI;SNOMEDCT|1|1|1|  
D&C|D & C;D and C;D&C;c  
d|C0012358;C0012764;C1444662;C1512015|||C0012358|CHV;MSH;NCI|||  
D&C|Dilatation and curettage NOS (procedure)|||C0012358|SNOMEDCT|||  
D&C|Dilatation of cervix and curettage of uterus|||C0012358|SNOMEDCT|||  
D&C|Dilatation of cervix and curettage of uterus  
(procedure)|||C0012358|SNOMEDCT|||  
D&C|Dilation and Curettage of the Uterus;Dilation and curettage of  
uterus;Dilation and curettage of uterus, NOS|||C0012358|ICD9CM;NCI;SNOMEDCT|||  
D&C|Dilation and curettage (procedure)|||C0012358|SNOMEDCT|||  
D&C|Dilation and curettage - action|||C0012358|SNOMEDCT|||  
D&C|Dilation and curettage - action (qualifier value)|||C0012358|SNOMEDCT|||  
D&C|Dilation and curettage of uterus (procedure)|||C0012358|SNOMEDCT|||  
D&C|deep and clear|||1|1|  
D&C|direct and consensual|||1|0.018|||1|  
D&C|drugs and cosmetics|||1|1|  
D1|(cyclin) D1|C0174680|1|0.014|||1|  
D1|(vitamin) D1|||1|0.028|||1|  
D1|D|C1416886;C1442449|||C1416886|HUGO;OMIM|||  
D1|64kD;D1;HASHIMOTO THYROIDITIS AUTOANTIGEN, 64-KD;LEIOMODIN 1;LEIOMODIN,  
SMOOTH MUSCLE;LMOD1;LMOD1 gene;SMLMOD|C1416886|||C1416886|HUGO;MTH;OMIM|||  
D1|THYROID AND EYE MUSCLE AUTOANTIGEN, 64-KD|||C1416886|OMIM|||  
D1|THYROID-ASSOCIATED OPHTHALMOPATHY AUTOANTIGEN, 64-KD|||C1416886|OMIM|||  
D1|Type 1 iodothyronine deiodinase|||1|0.0432|  
D1|day one|||1|1|  
D1|deiodinase type 1;type 1 deiodinase|C0669524|||1|0.0791|1|  
D1|depression 1|||1|0.002|||1|  
D1|domain|C1880389;C1883221|||1|0.2662|  
D1|domain 1|||1|0.1151|  
D1|first|C0205435;C1279901|||1|0.1079|  
D1|first day|||1|0.0432|

D1|first diagonal branch||1|0.952||1|0.0432|1  
D1|leiomodin 1 (smooth muscle)|||C1416886|HUGO||  
D1|limited|C0439801|||1|0.0863|  
D1|type I|C0441729|||1|0.0647|  
D1|type I deiodinase|||1|0.1007|  
D1|type I iodothyronine deiodinase|C1414051|||1|0.0504|  
DCIS|Carcinoma, Intraductal;Carcinomas, Intraductal;Intraductal  
Carcinoma;Intraductal Carcinomas;Intraductal carcinoma;Intraductal carcinoma,  
NOS;carcinoma intraductal;intraductal carcinoma;Carcinoma, Intraductal,  
Noninfiltrating;Carcinoma, Noninfiltrating Intraductal;Carcinomas,  
Noninfiltrating Intraductal;Intraductal Carcinoma, Noninfiltrating;Intraductal  
Carcinomas, Noninfiltrating;Intraductal carcinoma, noninfiltrating;Intraductal  
carcinoma, noninfiltrating, NOS;Noninfiltrating Intraductal  
Carcinoma;Noninfiltrating Intraductal Carcinomas;DCIS of the breast;Ductal  
Breast Carcinoma In Situ;Ductal Breast Carcinoma in Situ;Ductal Carcinoma in  
situ of Breast;Ductal Carcinoma in situ of the Breast;breast carcinoma ductal  
situ;breast ductal carcinoma in situ;ductal carcinoma in situ of the breast;in  
situ ductal breast carcinoma;Ductal Carcinoma In Situ;Ductal Carcinoma in  
situ;Ductal carcinoma in situ;carcinoma ductal in situ;carcinoma ductal  
situ;ductal carcinoma in situ;ductal carcinoma situ;ductal in situ carcinoma;in  
situ ductal carcinoma;Intraductal Breast Carcinoma;Intraductal Carcinoma of  
Breast;Intraductal Carcinoma of the Breast;Intraductal carcinoma of  
breast;intraductal breast carcinoma;intraductal carcinoma breast;Intraductal  
adenocarcinoma, noninfiltrating;Intraductal adenocarcinoma, noninfiltrating,  
NOS;Intraductal carcinoma in situ of breast;Non-Infiltrating Ductal  
Adenocarcinoma of Breast;Non-Infiltrating Ductal Adenocarcinoma of the  
Breast;Non-Infiltrating Ductal Breast Adenocarcinoma;Non-Infiltrating Ductal  
Breast Carcinoma;Non-Infiltrating Ductal Carcinoma of Breast;Non-Infiltrating  
Ductal Carcinoma of the Breast;Non-Infiltrating Intraductal Adenocarcinoma;Non-  
infiltrating intraductal adenocarcinoma;Non-Infiltrating Intraductal  
Adenocarcinoma of Breast;Non-Infiltrating Intraductal Adenocarcinoma of the  
Breast;Non-Infiltrating Intraductal Breast Adenocarcinoma;Non-Infiltrating  
Intraductal Carcinoma;Non-infiltrating intraductal carcinoma;Non-Invasive Ductal  
Adenocarcinoma of Breast;Non-Invasive Ductal Adenocarcinoma of the Breast;Non-  
Invasive Ductal Breast Adenocarcinoma;Non-Invasive Ductal Breast Carcinoma;Non-  
Invasive Ductal Carcinoma of Breast;Non-Invasive Ductal Carcinoma of the  
Breast;Non-Invasive Intraductal Adenocarcinoma of Breast;Non-Invasive  
Intraductal Adenocarcinoma of the Breast;Non-Invasive Intraductal Breast  
Adenocarcinoma;breast cancer intraductal;intraductal breast cancer;ductal cancer  
in situ of the  
breast|C0007124|1|1|C0007124|CHV;CSP;MSH;MTH;NCI;NDFRT;PDQ;SNOMEDCT|1|0.9875|1  
DCIS|Carcinoma, Intraductal, Noninfiltrating  
[Disease/Finding]|||C0007124|NDFRT||  
DCIS|DCIS;dci;dcis|C0007124;C1413929;C2348081|||C0007124|CHV;CSP;LNC;MSH;NCI;NDF  
RT;SNOMEDCT||  
DCIS|Intraduct carcinoma of breast|||C0007124|SNOMEDCT||  
DCIS|Intraduct carcinoma of breast (disorder)|||C0007124|SNOMEDCT||  
DCIS|Intraductal carcinoma in situ of breast (disorder)|||C0007124|SNOMEDCT||  
DCIS|Intraductal carcinoma of breast (disorder)|||C0007124|SNOMEDCT||  
DCIS|Intraductal carcinoma, noninfiltrating (morphologic  
abnormality)|||C0007124|SNOMEDCT||  
DCIS|Intraductal carcinoma, noninfiltrating, no ICD-O  
subtype|||C0007124|SNOMEDCT||  
DCIS|Intraductal carcinoma, noninfiltrating, no ICD-O subtype (morphologic  
abnormality)|||C0007124|SNOMEDCT||  
DCIS|[M]Intraductal carcinoma, non-infiltrating NOS|||C0007124|SNOMEDCT||

DCIS|[M]Intraductal carcinoma, non-infiltrating NOS (morphologic abnormality)|||C0007124|SNOMEDCT|||  
DCIS|carcinomas|C0007097|||1|0.0115|  
DCIS|ductal carcinoma of breast|C1527349|||1|0.001|  
DC|(diltiazem) DC||1|0.002|||  
DC|(drug) DC||1|0.002|||  
DC|2'-deoxycytidine|||1|0.0025|  
DC|CDR|||C0011485|MSH;NDFRT|||  
DC|Chiropractic Physician;D.C.M.;Doctor of Chiropractic|C1512015||C1512015|MTH;NCI|||  
DC|Cytidine, 2'-deoxy-;Cytosine Deoxyribonucleoside;Deoxyribonucleoside, Cytosine;Cytosine Deoxyriboside;Deoxyriboside, Cytosine;Deoxycytidine;deoxycytidine|C0011485||C0011485|CHV;CSP;MSH;MTH;NCI;NDFRT;PDQ|1|0.0076|1  
DC|D.C.;D/C;d.c.|C0012358;C0012764;C1444662;C1512015||C0012764;C1444662;C1512015|AOD;CHV;NCI|||  
DC|DBCN;LISX|C1413938;C2699546||C1413938;C2699546|HUGO;NCI;OMIM|||  
DC|DC;dC;dc|||C0011485;C0012764;C1413938;C1444662;C1512015;C1705348;C2699546|HUGO;NCI;PDQ|||  
DC|DCM|||C1512015|NCI|||  
DC|DCX;DCX Gene;DCX gene|C1413938||C1413938|HUGO;LNC;MTH;NCI;OMIM|||  
DC|DCX wt Allele|C2699546||C2699546|MTH;NCI|||  
DC|DIS|C0451119;C1444662||C1444662|NCI|||  
DC|DOUBLECORTIN;doublecortin;Doublecortex; Lissencephaly, X-Linked (Doublecortin) Gene;Doublecortex; Lissencephaly, X-Linked (Doublecortin) wt Allele;doublecortex|C1413938;C2698456||C1413938;C2699546|HUGO;NCI;OMIM|||  
DC|Deoxycytidine [Chemical/Ingredient]|||C0011485|NDFRT|||  
DC|Direct compression|||1|0.0018|  
DC|Discontinuation|C0457454;C1444662||C1444662|NCI|||  
DC|Discontinue;Discontinued;discontinue;discontinued|C1444662;C1706472|1|0.564|C1444662|MTH;NCI;SNOMEDCT|||1  
DC|Discontinued (qualifier value)|||C1444662|SNOMEDCT|||  
DC|Discontinuous|C0439599;C1444662||C1444662|NCI|||  
DC|Disease Characteristics;Disease Characteristics Domain|C1705348||C1705348|MTH;NCI|||  
DC|District of Columbia;columbia district;district of columbia;Washington, D.C.;Washington, DC|C0012764|1|0.062|C0012764|AOD;CHV;MSH;MTH;NCI;SNOMEDCT|||  
DC|District of Columbia (geographic location)|||C0012764|SNOMEDCT|||  
DC|Dupuytren contracture;Dupuytren's contracture|C0013312|||1|0.0038|1  
DC|NATO code for diphenylarsine chloride|||1|  
DC|NATO code for diphenylcyanoarsine|||1|  
DC|SCLH|||C1413938;C2699546|HUGO;NCI|||  
DC|XLIS|C1413938;C1848199;C2699546||C1413938;C2699546|HUGO;NCI|||  
DC|control|C0009932;C0243148;C1550141;C1882979;C2587213|||1|0.0043|  
DC|daily census|||1|  
DC|data communication|||1|  
DC|data conversion|C2827657||C2827657|NCI|||  
DC|daycare|C0011017;C2827363|||1|  
DC|decarboxylase|C0007054|||1|  
DC|decrease|C0392756;C0547047|||1|  
DC|deep compartment|||1|  
DC|degenerating cell|||1|  
DC|degree of conversion|||1|0.009|  
DC|dendritic cell;dendritic cells|C0003315;C0011306;C1511762|||1|0.7836|1  
DC|deoxycholate|C0086123||C0086123|CHV;CSP;LNC;MSH;RXNORM;SNOMEDCT|1|0.0058|  
DC|deoxycholic acid|C0011479|||1|0.0022|  
DC|dermatochalasis|C0010495;C0423124|||1|

DC|descending  
colon|C0227389|||C0227389|AOD;CHV;CSP;FMA;MSH;MTH;MTHMST;NCI;SNOMEDCT;UWDA|||1  
DC|dextran charcoal|||1  
DC|dextrocardia|C0011813|||1  
DC|diabetic coma|C1263960|||1  
DC|diagnostic center|||1  
DC|diagnostic code|||1  
DC|diagonal conjugate|C0923004|||C0923004|FMA;UWDA|||1  
DC|dichorionic|||1|0.004|  
DC|diene conjugates|||1|0.0085|  
DC|differentiated carcinoma|||1  
DC|differentiated cell|||1  
DC|diffuse cortical|||1  
DC|diffusing capacity|C1280474|||1  
DC|diffusion chambers|||1|0.0157|  
DC|digit copying|||1  
DC|digital computer|C0086044|||C0086044|MSH|||  
DC|dilated cardiomyopathy|C0007193;C2984282|||1|0.0101|  
DC|dilation and curettage|||1  
DC|dilation catheter|||1  
DC|diphenylarsine cyanide|||1  
DC|diphenylcyanoarsine|C0301230|||C0301230|SNOMEDCT|||  
DC|direct Coombs|||1  
DC|direct and consensual||1|0.002|||1  
DC|direct current|C0442831|1|0.304||1|0.0922|1  
DC|disc|C0180459;C1556138;C1705229;C2348299|||C1444662|NCI|||  
DC|discharge;discharged|C0012621;C0030685;C2926602|1|0.062|||1  
DC|discomfort|C0231218;C0234215|||1  
DC|distal colon|||1  
DC|distal cusp|C0447396|||1  
DC|distensibility|||1|0.002|  
DC|distensibility coefficient|||1|0.0067|  
DC|distocervical|||1  
DC|donor cells|||1  
DC|dorsal column|C0458459|||1|0.0139|1  
DC|dorsal cortex|||1|0.0031|  
DC|doxycycline|C0013090|||1|0.0076|  
DC|dressing change|C0085671|||C0085671|CHV;MTH;SNOMEDCT|||1  
DC|dual chamber|C0725893|||1  
DC|duodenal cap|C0227300;C1284424|||C0227300;C1284424|CHV;FMA;SNOMEDCT;UWDA|||1  
DC|dynamic compression|||1|0.0013|1  
DC|dyskeratosis  
congenita|C0265965|||C0265965|CHV;MSH;MTH;NDFRT;PDQ;SNOMEDCT|1|0.0137|1  
DDAVP|1-deamino-8-D-arginine  
vasopressin;desmopressin|C0011701|||C0011701|CHV;MSH;MTH;NCI;NDFRT;RXNORM;SNOMED  
CT;USPMG;VANDF|1|0.3715|  
DDAVP|1-desamino-8-D-arginine vasopressin||1|1.000||1|0.3883|  
DDAVP|DDAVP;ddavp;Desmopressine Ferring;Ferring,  
Desmopressine;Desmospray;Desmotabs;Ferring Brand 1 of Desmopressin  
Acetate;Octim;Octostim|C0701195|||C0701195|CHV;MSH;MTH;NCI;RXNORM|||  
DDAVP|desmopressin acetate|C0086135|||1|0.2095|  
DDAVP|vasopressin analogue|C2917446|||1|0.0307|  
DDDR|dual, dual, dual, rate||1|1.000|||1  
DEXA|Absorptiometries, DPX;Absorptiometry, DPX;DPX  
Absorptiometry;Absorptiometry, Dual Energy X Ray;Absorptiometry, Dual-Energy X-  
Ray;Dual Energy X Ray Absorptiometry;Dual Energy X-ray Absorptiometry;Dual-  
Energy X-Ray Absorptiometry;X Ray Absorptiometry, Dual Energy;X-Ray

Absorptiometry, Dual-Energy;dual energy x-ray absorptiometry;dual-energy X-ray absorptiometry;dual-energy x-ray absorptiometry;Absorptiometry, Dual X Ray;Absorptiometry, Dual X-Ray;Dual X Ray Absorptiometry;Dual X-Ray Absorptiometry;Dual X-ray Absorptiometry;X-Ray Absorptiometry, Dual;dual x-ray absorptiometry;BMD scan;DEXA;DXA;dxa;bone mineral density scan;dual energy x-ray absorptiometric scan|C1510486|1|0.998|C1510486|CHV;CSP;MSH;MTH;NCI;PDQ|1|0.8313|1  
DEXA|DEXA scan|C1510486;C1959592|||C1510486|NCI;PDQ|||  
DEXA|dexamethasone|C0011777|1|0.002|||1|0.1563|  
DEXA|dual energy X-ray absorptiometer|||1|0.0125|  
DEXA|dual-energy x-ray absorptiometry (DXA) scan|||C1510486|CHV|||  
DIC|1H-Imidazole-4-carboxamide, 5-(3,3-dimethyl-1-triazenyl)-;1H-imidazole-4-carboxamide, 5-(3,3-dimethyl-1-triazenyl)-;5-(3-3-dimethyl-1-triazenyl)-1H-imidazole-4-carboxamide|||C0010927|MSH;NCI;NDFRT;PDQ|||  
DIC|4-(Dimethyltriazeno)imidazole-5-carboxamide;5-(Dimethyltriazeno)imidazole-4-carboxamide;5-(dimethyltriazeno)imidazole-4-carboxamide|||C0010927|NCI;PDQ|||  
DIC|5(or 4)-(dimethyltriazeno)imidazole-4(or 5)-carboxamide|||C0010927|NCI;PDQ|||  
DIC|5-(3,3-Dimethyl-1-triazeno)imidazole-4-carboxamide|||C0010927|MSH;NDFRT|||  
DIC|COAG DISSEM INTRAVASC;DISSEM COAG INTRAVASC;DISSEM INTRAVASC COAG;INTRAVASC COAG DISSEM;INTRAVASC DISSEM COAG|||C0012739|MSH|||  
DIC|COAGULATION (DIC), DISSEMINATED INTRAVASCULAR;DIC - Disseminated intravascular coagulation;DIC, DISSEMINATED INTRAVASCULAR COAGULATION;DISSEMINATED INTRAVASCULAR COAGULATION (DIC);INTRAVASCULAR COAGULATION (DIC), DISSEMINATED;disseminated intravascular coagulation (DIC);CONSUMPTION COAGULOPATHY;Coagulopathies, Consumption;Coagulopathy, Consumption;Consumption Coagulopathies;Consumption Coagulopathy;Consumption coagulopathy;consumption coagulopathy;Coagulation, Disseminated Intravascular;Coagulation, Intravascular Disseminated;Coagulations, Disseminated Intravascular;Coagulations, Intravascular Disseminated;DISSEMINATED INTRAVASCULAR COAGULATION;Disseminated Coagulation, Intravascular;Disseminated Coagulations, Intravascular;Disseminated Intravascular Coagulation;Disseminated Intravascular Coagulations;Disseminated intravascular coagulation;Intravascular Coagulation, Disseminated;Intravascular Coagulations, Disseminated;Intravascular Disseminated Coagulation;Intravascular Disseminated Coagulations;disseminated intravascular coagulation;Consumptive Coagulopathy;Consumptive coagulopathy;consumptive coagulopathy;Consumptive thrombohaemorrhagic disorder;Consumptive thrombohemorrhagic disorder;Consumptive thrombohemorrhagic disorder, NOS;D.I.C.;DEFIBRINATION SYNDROME;Defibrination syndrome;defibrination syndrome;DIC SYNDROME;DIC syndrome;Haemorrhagic fibrinogenolysis;Hemorrhagic fibrinogenolysis|C0012739|1|1|C0012739|CHV;CSP;CST;DXP;ICD9CM;LCH;MSH;MTH;MTHICD 9;NCI;NDFRT;OMIM;QMR;SNOMEDCT|1|0.8473|1  
DIC|Carboxamide, Dimethyl Imidazole;Dimethyl Imidazole Carboxamide;Imidazole Carboxamide, Dimethyl;DACARBAZINE;Dacarbazine;Decarbazine;dacarbazine;DIC - Dacarbazine;DTIC;dtic;DTIC - Dacarbazine;Dacarbazine (DTIC);Dacarbazine - DTIC;Dacarbazina;Dakarbazin;Dimethyl Triazeno Imidazol Carboxamide;Dimethyl Triazeno Imidazole Carboxamide;Dimethyl-triazeno-imidazole carboxamide;Dimethyl-triazeno-imidazole-carboximide;dimethyl-triazeno-imidazole carboxamide;ICDT;Imidazole Carboxamide  
Dimethyltriazeno;dimethyltriazenoimidazole carboxamide|C0010927|||C0010927|CHV;CSP;MSH;MTH;MTHSPL;NCI;NDFRT;PDQ;RXNORM;SNOM EDCT;USPMG;VANDF|||  
DIC|DIC;dic|||C0010927;C0012739;C0333710;C1420151|CST;DXP;MSH;NCI;NDFRT;OMIM;PDQ|||  
DIC|DICARBOXYLATE ION CARRIER;SLC25A10;SLC25A10 gene|C1420151|||C1420151|HUGO;MTH;OMIM|||  
DIC|DISSEM. INTRAVASC. COAGULATION|C0005778;C0441509;C1328723|||C0012739|CST|||

DIC|Dacarbazine (product)|||C0010927|SNOMEDCT|||  
 DIC|Dacarbazine (substance)|||C0010927|SNOMEDCT|||  
 DIC|Dacarbazine [Chemical/Ingredient)|||C0010927|NDFRT|||  
 DIC|Dicentric;dicentric;Dicentric Chromosome;Dicentric  
 chromosome|C0333710|||C0333710|MTH;NCI;SNOMEDCT|||1  
 DIC|Dicentric chromosome (morphologic abnormality)|||C0333710|SNOMEDCT|||  
 DIC|Diffuse or disseminated intravascular coagulation|||C0012739|MTHICD9|||  
 DIC|Dimethyl (triazeno) imidazolecarboxamide|||C0010927|NCI;PDQ|||  
 DIC|Dissemin. intravascular coag.|||C0012739|SNOMEDCT|||  
 DIC|Disseminated Intravascular Coagulation  
 [Disease/Finding)|||C0012739|NDFRT|||  
 DIC|Disseminated intravascular coagulation (disorder)|||C0012739|SNOMEDCT|||  
 DIC|SOLUTE CARRIER FAMILY 25 (MITOCHONDRIAL CARRIER), MEMBER  
 10|||C1420151|OMIM|||  
 DIC|days in culture|||1|0.0057|  
 DIC|deviance information criterion|||1|0.0057|  
 DIC|diagnostic imaging center|||1|  
 DIC|dicumarol|C0005640|||C0005640|CHV;CSP;MSH;MTH;NCI;NDFRT;PDQ;RXNORM;SNOMEDCT;  
 VANDF|||  
 DIC|differential interference contrast|||1|0.0557|1  
 DIC|diffuse intravascular coagulation|||1|  
 DIC|diisopropylcarbodiimide|||1|0.0052|  
 DIC|direct isotope cystography|||1|  
 DIC|disposable inner cannula|||1|  
 DIC|disseminated intravascular clotting|||1|0.0057|  
 DIC|disseminated intravascular coagulation syndrome|||1|0.0098|  
 DIC|disseminated intravascular coagulopathy|||1|0.0449|  
 DIC|dissolved inorganic carbon|||1|0.0103|  
 DIC|drip infusion cholangiogram|||1|  
 DIC|drip infusion cholangiograph|||1|  
 DIC|drip infusion cholangiography|||1|0.0036|1  
 DIC|drug information center|||1|0.0062|1  
 DIC|solute carrier family 25 (mitochondrial carrier; dicarboxylate transporter),  
 member 10|||C1420151|HUGO|||  
 DIP|Biomedical Imaging Program;Diagnostic Imaging  
 Program|C1511878|||C1511878|MTH;NCI|||  
 DIP|DEATH-INDUCING PROTEIN;death-inducing-protein;GRAM DOMAIN-CONTAINING PROTEIN  
 4;GRAMD4;GRAMD4 gene;KIAA0767|C2266648|||C2266648|HUGO;MTH;OMIM|||  
 DIP|DELTA SLEEP-INDUCING PEPTIDE, IMMUNOREACTOR;DSIPI;GILZ;TSC-22R;TSC22 DOMAIN  
 FAMILY, MEMBER 3;TSC22 domain family, member 3;TSC22D3;TSC22D3  
 gene;hDIP|C1540075|||C1540075|HUGO;MTH;OMIM|||  
 DIP|DIP;Dip|||C0037390;C0040338;C0057737;C0238378;C1511878;C1540075;C2266648;C2  
 826223|DXP;HUGO;MEDLINEPLUS;MSH;NCI;OMIM|||  
 DIP|DIP - Desquamative interstitial pneumonitis;Desquamative Interstitial  
 Pneumonia;Desquamative interstitial pneumonia;PNEUMONIA, DESQUAMATIVE  
 INTERSTITIAL;desquamative interstitial pneumonia;Desquamative interstitial  
 pneumonitis;desquamative interstitial pneumonitis;ILD, DESQUAMATIVE;INTERSTITIAL  
 LUNG DISEASE, DESQUAMATIVE;INTERSTITIAL PNEUMONITIS, DESQUAMATIVE,  
 FAMILIAL;PNEUMONITIS, DESQUAMATIVE INTERSTITIAL, FAMILIAL;PNEUMONIA,  
 DESQUAMATIVE INTERSTITIAL, FAMILIAL;RBILD;Respiratory Bronchiolitis Interstitial  
 Lung Disease;Respiratory bronchiolitis interstitial lung disease;desquamative  
 interstitial pneumonia  
 (DIP)|C0238378|1|0.072|C0238378|CHV;DXP;ICD9CM;MTH;NCI;OMIM;SNOMEDCT|1|0.1463|1  
 DIP|Desquamative interstitial pneumonia (disorder)|||C0238378|SNOMEDCT|||  
 DIP|Desquamativ interst pneu|||C0238378|ICD9CM|||  
 DIP|Dip Dosing Unit|C2826223|||C2826223|MTH;NCI|||

DIP|GLUCOCORTICOID-INDUCED LEUCINE ZIPPER;glucocorticoid-induced leucine zipper|||C1540075|HUGO;OMIM|||  
DIP|GRAM domain containing 4|||C2266648|HUGO|||  
DIP|Resp brncio interst lung|||C0238378|ICD9CM|||  
DIP|Smokeless Tobacco;Smokeless Tobaccos;TOBACCO, SMOKELESS;Tobacco, Smokeless;Tobaccos, Smokeless;smokeless tobacco|C0040338|||C0040338|AOD;CHV;CSP;MEDLINEPLUS;MSH;MTH;NCI;SPN|||  
DIP|Smoking, Tobacco and Cancer - Smokeless Tobacco|||C0040338|NCI|||  
DIP|Snuff;Snuffs;snuff;Snuff Tobacco;Snuff tobacco|C0037390|||C0037390|AOD;CHV;CSP;MEDLINEPLUS;MSH;MTH;NCI;SNOMEDCT|||  
DIP|Snuff tobacco (substance)|||C0037390|SNOMEDCT|||  
DIP|Spit Tobacco;Spit tobacco|C0008038;C0040338|||C0040338|MEDLINEPLUS|||  
DIP|defective interfering particles|C0011139|||1|0.0213|  
DIP|degradable intake protein|||1|0.0457|  
DIP|diazenedicarboxylic acid bis(N'-methylpiperazide)|||C0057737|MSH;MTH|||  
DIP|dichlorophenolindophenol|C0000232|||1|  
DIP|diffuse interstitial pneumonia|||1|  
DIP|diffuse interstitial pneumonitis|||1|  
DIP|digital image processing;digital imaging processing|||1|0.0305|1|  
DIP|diisopropyl phosphate|||1|  
DIP|diphtheria toxoid vaccine|C0012551|||1|  
DIP|diploid|C0012568|||1|  
DIP|diplopia|C0012569|||1|  
DIP|dipropionate|||1|0.004|||  
DIP|dipyridamole|C0012582|||C0012582|CHV;CSP;LNC;MSH;MTH;MTHSPL;NCI;NDFRT;PDQ;RX NORM;SNOMEDCT;USPMG;VANDF|1|0.1768|  
DIP|distal interphalangeal|||1|0.924|||1|0.3628|1|  
DIP|distal interphalangeal joint|C0932510|||C0932510|CHV;FMA;UWDA|1|0.0549|  
DIP|drip infusion pyelography|||1|0.0945|  
DIP|drip-infusion pyelogram|||1|  
DIP|drug-induced parkinsonism|C0270729|||C0270729|SNOMEDCT|1|0.0671|1|  
DJD|ARTHRITIS, HYPERTROPHIC;Hypertrophic arthritis;Hypertrophic arthritis, NOS;hypertrophic arthritis;ARTHRITIS, SENESCENT;ARTHROPATHY, DEGENERATIVE;Degenerative arthropathy;Degenerative arthropathy, NOS;degenerative arthropathy;Arthritides, Degenerative;Arthritis, Degenerative;Degenerative Arthritides;Degenerative Arthritis;Degenerative arthritis;Degenerative arthritis, NOS;arthritis degenerative;degenerative arthritis;DEGENERATIVE JOINT DISEASE;Degenerative Joint Disease;Degenerative joint disease;Degenerative joint disease, NOS;JOINT DISEASE, DEGENERATIVE;degenerative disease joint;degenerative disease joints;degenerative diseases joint;degenerative joint disease;DJD;Degenerative polyarthritis;Degenerative polyarthritis, NOS;Hypertrophic polyarthritis;Hypertrophic polyarthritis, NOS;OA - Osteoarthritis;oa osteoarthritis;OA - Osteoarthrosis;OS1;OSTEOARTHRITIS;Osteoarthritides;Osteoarthritis;Osteoarthritis NOS;Osteoarthritis, NOS;osteoarthritis;OSTEOARTHRITIS SUSCEPTIBILITY 1;Osteoarthritis NOS, of unspecified site;a o;o a;arthritis osteoarthritis;osteoarthritis arthritis;degenerative osteoarthritis;osteoarthritis degenerative;primary OA|C0029408|1|1|C0029408|AIR;AOD;CCS;CHV;COSTAR;CSP;DXP;LCH;MEDLINEPLUS;MSH;MTH; NCI;NDFRT;OMIM;QMR;SNOMEDCT|1|1|1|  
DJD|Degenerative arthropathy (disorder)|||C0029408|SNOMEDCT|||  
DJD|Degenerative joint disease (disorder)|||C0029408|SNOMEDCT|||  
DJD|Degenerative polyarthritis (disorder)|||C0029408|SNOMEDCT|||  
DJD|Joint degeneration|||C0029408|SNOMEDCT|||  
DJD|OA;oas|C0029408;C0599973;C2985270|||C0029408|CHV;CSP;MEDLINEPLUS;OMIM|||  
DJD|OSTEOARTHRITIS OF HIP, FEMALE-SPECIFIC, SUSCEPTIBILITY TO|||C0029408|OMIM|||

DJD|OSTEOARTHRISIS;Osteoarthroses;Osteoarthritis;osteoarthritis;arthrosis|C00224  
08;C0029408|||C0029408|AOD;CHV;DXP;MEDLINEPLUS;MSH;NDFRT;OMIM;SNOMEDCT|||  
DJD|Osteoarthritis (& [allied disorders]);Osteoarthritis and allied  
disorders|||C0029408|SNOMEDCT|||  
DJD|Osteoarthritis (disorder);Osteoarthritis NOS  
(disorder)|||C0029408|SNOMEDCT|||  
DJD|Osteoarthritis NOS, of unspecified site (disorder)|||C0029408|SNOMEDCT|||  
DJD|Osteoarthritis [Disease/Finding]|||C0029408|NDFRT|||  
DJD|Osteoarthritis, unspecified whether generalized or  
localized|||C0029408|ICD9CM|||  
DJD|[Joint degeneration] or [osteoarthritis NOS]|||C0029408|SNOMEDCT|||  
DJD|[Joint degeneration] or [osteoarthritis NOS]  
(disorder)|||C0029408|SNOMEDCT|||  
DJD|arthrosys|||C0029408|CHV|||  
DJD|osteoarthriti|||C0029408|CHV|||  
DJD|osteoarthrities|||C0029408|CHV|||  
DJD|osteoarthrosys|||C0029408|CHV|||  
DKA|ACIDOSIS DIABETIC;ACIDOSIS, DIABETIC;Acidoses, Diabetic;Acidosis,  
Diabetic;DIABETIC ACIDOSIS;Diabetic Acidoses;Diabetic Acidosis;Diabetic  
acidosis;Diabetic acidosis, NOS;diabetic acidosis;DIABETIC KETOACIDOSIS;Diabetic  
Ketoacidoses;Diabetic Ketoacidosis;Diabetic ketoacidosis;KETOACIDOSIS,  
DIABETIC;Ketoacidoses, Diabetic;Ketoacidosis - diabetic;Ketoacidosis,  
Diabetic;diabetic ketoacidoses;diabetic ketoacidosis;DKA;Diabetes Mellitus with  
Ketoacidosis;Diabetes mellitus (& [ketoacidosis]);Diabetes mellitus NOS with  
ketoacidosis;Diabetes mellitus with ketoacidosis;Ketoacidosis in diabetes  
mellitus;Diabetes with ketoacidosis;Diabetic Ketoses;Ketoses, Diabetic;diabetic  
ketoses;Diabetic Ketosis;Ketosis, Diabetic;diabetic ketosis;Diabetic acidosis  
without coma;Diabetic ketosis without  
coma|C0011880|1|0.998|C0011880|AOD;CHV;COSTAR;CSP;CST;DXP;ICD9CM;MSH;MTH;NCI;NDF  
RT;OMIM;QMR;SNOMEDCT|1|1|1|  
DKA|DKA - Diabetic ketoacidosis|||C0011880|SNOMEDCT|||  
DKA|Diabetes mellitus (& [ketoacidosis]) (disorder);Diabetes mellitus NOS with  
ketoacidosis (disorder);Ketoacidosis in diabetes mellitus  
(disorder)|||C0011880|SNOMEDCT|||  
DKA|Diabetes with ketoacidosis (disorder)|||C0011880|SNOMEDCT|||  
DKA|Diabetic Ketoacidosis [Disease/Finding]|||C0011880|NDFRT|||  
DKA|did keep appointment|||1|  
DLCO|Carbon Monoxide Diffusing Capability Test;DLCO|C1516251|||C1516251|NCI|||  
DLCO|Diffusion Capacity of the Lung for Carbon Monoxide;diffusion capacity of  
the lung for carbon monoxide|||C1516251|NCI|1|0.0502|  
DLCO|PFT/DLCO|||C1516251|NCI|||  
DLCO|Pulmonary Function Test/Carbon Monoxide Diffusing  
Capability|||C1516251|NCI|||  
DLCO|carbon monoxide diffusing capacity;diffusing capacity for carbon  
monoxide|C0199525|||1|0.4983|  
DLCO|carbon monoxide diffusion capacity;diffusion capacity for carbon  
monoxide|||1|0.1605|  
DLCO|diffusing capacity for CO|||1|0.0569|  
DLCO|diffusing capacity of the lung|||1|0.0334|  
DLCO|diffusing capacity of the lung for carbon monoxide||1|1.000||1|0.1672|  
DLCO|transfer factor|C0040673;C1280474|||1|0.0334|  
DM|(11Beta,16alpha)-9-fluoro-11,17,21-trihydroxy-16-methylpregna-1,4-diene-3,20-  
dione;Pregna-1,4-diene-3,20-dione, 9-fluoro-11,17,21-trihydroxy-16-methyl-,  
(11beta,16alpha)-|||C0011777|MSH;NCI;NDFRT;PDQ|||  
DM|1-Dehydro-16alpha-methyl-9alpha-fluorohydrocortisone;16Alpha-methyl-9alpha-  
fluoro-delta1-hydrocortisone;9Alpha-fluoro-16alpha-methylprednisolone;9alpha-  
Fluoro-16alpha- methylprednisolone;Fluoro-9alpha Methyl-16alpha

Prednisolone;DEXAMETHASONE;Dexamethasone;dexamethasone;Desamethasone;Dexamethasone preparation;Dexamethasonum;Hexadecadrol;Methylfluorprednisolone|C0011777|||C0011777|AOD;CHV;CSP;LNC;MSH;MTH;MTHSPL;NCI;NDFRT;PDQ;RXNORM;SNOMEDCT;USPMG;VANDF|1|0.0369|  
DM|16Alpha-methyl-9alpha-fluoro-1,4-pregnadiene-11beta,17alpha,21-triol-3,20-dione|||C0011777|NCI;PDQ|||  
DM|16Alpha-methyl-9alpha-fluoroprednisolone|||C0011777|NCI;PDQ|||  
DM|9Alpha-fluoro-11beta,17alpha,21-trihydroxy-16alpha-methylpregna-1,4-diene-3,20-dione|||C0011777|NCI;PDQ|||  
DM|CURSCHMANN-BATTEN-STEINERT SYNDROME;DM - Dystrophia myotonica;DYSTROPHIA MYOTONICA;Dystrophia Myotonica;Dystrophia myotonica;dystrophia myotonica;DYSTROPHY, MYOTONIC;Dystrophies, Myotonic;Dystrophy, Myotonic;Myotonic Dystrophies;Myotonic Dystrophy;Myotonic dystrophy;dystrophy myotonic;myotonic dystrophy;MYOTONIA ATROPHICA;Myotonia Atrophica;Myotonia atrophica;myotonia atrophica;Myotonia Dystrophica;Myotonia dystrophica;myotonia dystrophica;STEINERT DISEASE;Steinert Disease;Steinert disease;Steinert's Disease;Steinert's disease;disease steinerts;steinert disease;steinert's disease;Steinert myotonic dystrophy syndrome;Steinert syndrome;steinert syndrome;syndrome steinert|C0027126|||C0027126|CHV;COSTAR;CSP;DXP;LCH;MSH;MTH;MTHICD9;NCI;NDFRT;OMIM;SNOMEDCT|1|0.1881|1  
DM|Commonwealth of  
Dominica;DOMINICA;Dominica|C0013013|||C0013013|MSH;MTH;NCI;SNOMEDCT|||  
DM|Commonwealth of Dominica (geographic location)|||C0013013|SNOMEDCT|||  
DM|DM;dm|||C0011777;C0013013;C0027126;C0439199;C1414085;C1512047;C1704791|HUGO;NCI;OMIM;PDQ;SNOMEDCT|||  
DM|DM KINASE;DM PROTEIN KINASE;DM protein kinase;MYOTONIN-PROTEIN KINASE|C0216045;C1414085|||C1414085|HUGO;OMIM|||  
DM|DM1|||C1414085|HUGO|||  
DM|DM1PK;DMK;DMPK;DMPK gene;DYSTROPHIA MYOTONICA PROTEIN KINASE;dystrophia myotonica-protein kinase;MDPK;MT-PK;thymopietin homolog|C1414085|||C1414085|HUGO;LNC;MTH;OMIM|||  
DM|DMA|C0013013;C0058243;C0301360|||C0013013|NCI|||  
DM|DO|||C0013013|NCI|||  
DM|DXM|C0011777;C0011816;C0350422|||C0011777|PDQ|||  
DM|Decimeter;decimeter;decimetre|C0439199|||C0439199|MTH;NCI;SNOMEDCT|||1  
DM|Defined Medium|||1|0.0092|  
DM|Demographics|C0011292;C0011298;C1704791|||C1704791|NCI|||  
DM|Demographics Domain|C1704791|||C1704791|MTH;NCI|||  
DM|Descemet membrane;Descemet's membrane|C0011665|||1|0.0107|1  
DM|Desmoplastic Melanoma|C1333280|||1|0.0063|  
DM|Deutschmarks|||1|0.0049|  
DM|Dexamethasone (product)|||C0011777|SNOMEDCT|||  
DM|Dexamethasone (substance)|||C0011777|SNOMEDCT|||  
DM|Dexamethasone [Chemical/Ingredient]|||C0011777|NDFRT|||  
DM|Dexamethasone [endocrine use]|||C0011777|SNOMEDCT|||  
DM|Dexamethasone [endocrine use] (product)|||C0011777|SNOMEDCT|||  
DM|Dexamethasone [endocrine use] (substance)|||C0011777|SNOMEDCT|||  
DM|Dexamethasone preparation (product)|||C0011777|SNOMEDCT|||  
DM|Dexamethasone preparation (substance)|||C0011777|SNOMEDCT|||  
DM|Diabetic|C0241863|||1|0.0292|  
DM|Disease management;disease management|C0039798;C0376636|||C0039798;C0376636|CHV;MSH;MTH|1|0.0185|1  
DM|Distant metastasis;distant metastases;distant metastasis|C1269798|||C1269798|NCI;SNOMEDCT|1|0.0384|1  
DM|Dominica (geographic location)|||C0013013|SNOMEDCT|||

DM|Double Minutes;double minute;double minutes|C1512047|||C1512047|MTH;NCI|1|0.0146|1  
DM|Drosophila melanogaster|C0013139|||1|0.018|  
DM|HLA-DM|||1|0.0088|  
DM|Myotonic Dystrophy [Disease/Finding]|||C0027126|NDFRT|||  
DM|NATO code for diphenylaminearsine|||1  
DM|STEINERT DIS;STEINERTS DIS|||C0027126|MSH|||  
DM|Steinert myotonic dystrophy syndrome (disorder)|||C0027126|SNOMEDCT|||  
DM|Type 2 diabetes|C0011860|||1|0.0097|  
DM|adamsite|C0070542|||1  
DM|daunomycin;daunorubicin|C0011015|||C0011015|CHV;MSH;NCI;NDFRT;PDQ|1|0.0268|  
DM|decimeter (qualifier value)|||C0439199|SNOMEDCT|||  
DM|decimorgan|||1  
DM|dehydrated and malnourished|||1  
DM|deltamethrin|C0057233|||1|0.0044|  
DM|dermatology|C0011627;C1555731|||1  
DM|dermatomyositis|C0011633;C0221056|||C0011633;C0221056|AOD;CHV;COSTAR;CSP;CST;DXP;ICD9CM;LCH;MEDLINEPLUS;MSH;MTH;NCI;NDFRT;OMIM;SNOMEDCT|||1  
DM|dermorphin|C0057492|||1|0.0049|  
DM|dexamethasone (DMX)|||C0011777|CHV|||  
DM|dextromaltose|||1  
DM|dextromethorphan|C0011816|1|0.572|C0011816|CHV;CSP;LNC;MSH;MTH;MTHSPL;NCI;NDFRT;RXNORM;SNOMEDCT;VANDF|1|0.0739|  
DM|diabetes mellitus|C0011849|1|0.418|C0011849|AIR;AOD;CHV;COSTAR;CSP;CST;DXP;ICD9CM;ICPC;LNC;MEDLINEPLUS;MSH;MTH;NCI;NDFRT;OMIM;QMR;SNOMEDCT|||1  
DM|diabetic group|||1|0.0029|  
DM|diabetic mother|||1  
DM|diabetic patients|||1|0.0044|  
DM|diabetic rats|||1|0.0024|  
DM|diastolic murmur|C0232262|||C0232262|CHV;MSH;SNOMEDCT|||1  
DM|differentiation medium|||1|0.0039|  
DM|diffuse mixed|||1  
DM|diffusing capacity of alveolar membrane|||1  
DM|distal metastasis|||1  
DM|dm (qualifier value)|||C0439199|SNOMEDCT|||  
DM|dopamine|C0013030;C0201989|||C0013030;C0201989|AOD;CHV;CSP;FMA;LCH;LNC;MSH;MTH;NCI;NDFRT;PDQ;RXNORM;SNOMEDCT;USPMG;UWDA;VANDF|||1  
DM|dorsal medulla|||1|0.0044|  
DM|dorsomedial|||1|0.0267|1  
DM|dorsomedial medulla|||1|0.0068|  
DM|dorsomedial nucleus|C0228329|||1|0.0063|  
DM|dorsomedial nucleus of the intercollicular complex|||1|0.0024|  
DM|dorsomedial visual area|||1|0.0058|  
DM|dose modification|C1707811|||1  
DM|double membrane|||1  
DM|double minute chromosomes|||1|0.0058|  
DM|double-muscler|||1|0.0053|  
DM|dry mass|||1|0.0053|  
DM|dry matter|||1|0.2528|1  
DM|dry muscle|||1|0.0034|  
DM|duodenal mucosa|C0227284|||C0227284|FMA;MTH;SNOMEDCT;UWDA|||1  
DM|dura mater|C0013313|||1|0.0044|  
DM|dystrophia myotonica 1|C1414085;C2931688|||C1414085|HUGO|||  
DM|membrane diffusing capacity|||1|0.0131|1  
DM|method|C0025663;C0449851;C0871511|||1|0.0044|  
DM|myotonic dystrophi|||C0027126|CHV|||

DM|myotonic dystrophy associated protein kinase||||C1414085|HUGO|||  
DM|myotonin protein kinase A||||C1414085|HUGO|||  
DM|patients with dermatomyositis|||||1|0.0146|  
DM|patients with diabetes mellitus|||||1|0.1215|  
DNA|DNA;DNA - Deoxyribonucleic acid;deoxyribonucleic acid (DNA);DNA molecule;dna  
molecule;dna molecules;Deoxyribonucleic Acid;Deoxyribonucleic  
acid;Deoxyribonucleic acid, NOS;Deoxyribonucleic acids;deoxyribonucleic  
acid;deoxyribonucleic  
acids|C0012854|1|1|C0012854;C1325786|AOD;CHV;CSP;FMA;GO;LCH;LNC;MSH;MTH;MTHFDA;N  
CI;NDFRT;SNOMEDCT;UWDA|1|1|1  
DNA|DNA [Chemical/Ingredient]||||C0012854|NDFRT|||  
DNA|DNA location|C1325786|||C1325786|GO;MTH|||  
DNA|Deoxyribonucleic acid (substance)|||C0012854|SNOMEDCT|||  
DNA|did not answer|||||1  
DNA|did not attend|||||1  
DNA|do not administer|||||1  
DNA|does not apply|||||1  
DNI|do not intubate||1|1.000|||1  
DNR|(8S-cis)-8-Acetyl-10-[(3-amino-2,3,6-trideoxy-alpha-L-lyxo-  
hexopyranosyl)oxy]-7,8,9,10-tetrahydro-6,8,11-trihydroxy-1-methoxy-5,12-  
naphthacenedione;5,12-Naphthacenedione, 8-acetyl-10-[(3-amino-2,3,6-trideoxy-  
alpha-L-lyxo-hexopyranosyl)oxy]-7,8,9,10-tetrahydro-6,8,11-trihydroxy-1-methoxy-  
, (8S-cis)-;5,12-Naphthacenedione, 8-acetyl-10-[(3-amino-2,3,6-trideoxy-.alpha.-  
L-lyxo-hexopyranosyl)oxy]-7,8,9,10-tetrahydro-6,8,11-trihydroxy-1-methoxy-, (8S-  
cis)-|||C0011015|MSH;NCI;NDFRT;PDQ|||  
DNR|DAUNOMYCIN;Daunomycin;daunomycin;DAUNORUBICIN;DAUNOrubicin;Daunorubicin;daun  
orubicin;DNM;dnm;Dauno Rubidomycine;Dauno-  
Rubidomycine;Daunorrubicina;Leukaemomycin C;RUBOMYCIN C;Rubomycin  
C;Rubidomycin;rubidomycin;Rubomycin;rubomycin|C0011015|||C0011015|CHV;CSP;MSH;MT  
H;MTHSPL;NCI;NDFRT;PDQ;RXNORM;SNOMEDCT;VANDF|1|0.6149|  
DNR|DNAR - Do not attempt resuscitation|||C0582114|SNOMEDCT|||  
DNR|DNR|C0011015;C0582114|||C0011015;C0582114|NCI;PDQ;SNOMEDCT|||  
DNR|DNR - Do not resuscitate;Do not resuscitate;do not resuscitate;do-not-  
resuscitate;Not for attempted cardiopulmonary resuscitation;Not for  
resuscitation|C0582114|1|0.994|C0582114;C1547313|HL7V2.5;MTH;SNOMEDCT|1|0.2764|1  
DNR|DRB;drb|||C0011015|CHV;PDQ|||  
DNR|Daunorubicin (product)|||C0011015|SNOMEDCT|||  
DNR|Daunorubicin (substance)|||C0011015|SNOMEDCT|||  
DNR|Daunorubicin [Chemical/Ingredient]||||C0011015|NDFRT|||  
DNR|Department of Natural Resources||1|0.006|||1  
DNR|L-lyxo-Hexopyranoside, 3.beta.-acetyl-1,2,3,4,6,11-hexahydro-3,5,12-  
trihydroxy-10-metldioxo-1a-naphthacenyl 3-amino-2,3,6-trideoxy-, .alpha.-  
|||C0011015|NCI|||  
DNR|Not for resuscitation (finding)|||C0582114|SNOMEDCT|||  
DNR|did not respond|||||1  
DNR|do not report|||||1  
DNR|do-not-resuscitate order|C0079252|||C0079252|MSH|||  
DNR|dorsal nerve root|||||1  
DNR|dose nonuniformity ratio|||||1  
DNR|not resuscitate|||||1|0.1086|  
DOB|BD|||C0421451|NCI|||  
DOB|BRTHDAT;DOB - Date of birth;Date of birth of recipient of care;Patient date  
of birth|C0421451|||C0421451|MTH;NCI;SNOMEDCT|||  
DOB|Birth Date;Birth date;Date of Birth;Date of birth;birth date;birth date  
of;birthDate;births date;date of  
birth|C0421451;C0803906|1|0.998|C0421451|CHV;LNC;NCI;SNOMEDCT|||1  
DOB|Bromdimethoxyamphetamine|C0301362|||C0301362|MTH;SNOMEDCT|||

DOB|Bromdimethoxyamphetamine (substance)|||C0301362|SNOMEDCT|||  
DOB|DOB|C0301362;C0421451|||C0301362;C0421451|NCI;SNOMEDCT|||  
DOB|Date of birth (finding)|||C0421451|SNOMEDCT|||  
DOB|Date of birth (observable entity)|||C0421451|SNOMEDCT|||  
DOB|Date of birth of person cared for|||C0421451|SNOMEDCT|||  
DOB|Date of birth of recipient of care (observable entity)|||C0421451|SNOMEDCT|||  
DOB|Dobrava hantavirus|||1  
DOB|Dobutamine|C0012963|||111|  
DOB|dangle out of bed|||1  
DOB|delta over baseline|||1  
DOB|distal occlusal buccal|C0447334|||1  
DOB|doctor's order book|||1  
DOL|day of life||1|1.000|||1  
DOL|dolorimetric unit|||1  
DP|2,2',2'',2'''-[4,8-Dipiperidinopyrimido-[5,4-d]pyrimidine-2,6-diyl)dinitrilo]tetraethanol|||C0012582|NCI;PDQ|||  
DP|CD4+CD8+|C0483191|||1|0.0176|  
DP|CD4+CD8+ double-positive|||1|0.0451|  
DP|D-penicillamine|C0030817|||1|0.0588|  
DP|D.P.;DP;dP;D.P.M.;Doctor of Podiatric Medicine;Pod.D.;PodD|C1512024|||C0012582;C1419059;C1420414;C1512024;C2599755|HUGO;LNC;MTH;NCI;OMIM;PDQ|||  
DP|DIPYRIDAMOLE;Dipyridamole;dipyridamole;Dipyramidole;dipyramidole|C0012582|||C0012582|CHV;CSP;LNC;MSH;MTH;MTHSPL;NCI;NDFRT;PDQ;RXNORM;SNOMEDCT;USPMG;VANDF|1|0.093|  
DP|DOCKING PROTEIN|C1420414;C1760028|||C1420414|OMIM|||  
DP|DP1|C1327771;C1384538;C1419059|||C1419059|OMIM|||  
DP|DPM|C1512024;C1634619|||C1512024|NCI|||  
DP|Dermatophagoides Pteronyssinus;Dermatophagoides pteronyssinus|C0446330;C1122992|||1|0.1018|1  
DP|Dipyridamole (product)|||C0012582|SNOMEDCT|||  
DP|Dipyridamole (substance)|||C0012582|SNOMEDCT|||  
DP|Dipyridamole [Chemical/Ingredient]|||C0012582|NDFRT|||  
DP|Ethanol, 2,2',2'',2'''-(4,8-di-1-piperidinylpyrimido(5,4-d)pyrimidine-2,6-diyl)dinitrilo)tetrakis-|||C0012582|MSH;NDFRT|||  
DP|PROSTAGLANDIN D2 RECEPTOR|C0072269;C1419059|||C1419059|OMIM|||  
DP|PROSTANOID DP RECEPTOR;PTGDR;PTGDR gene|C1419059|||C1419059|HUGO;MTH;OMIM|||  
DP|SIGNAL RECOGNITION PARTICLE RECEPTOR|C0074511;C1420414;C1760029|||C1420414|OMIM|||  
DP|SRP-alpha;SRPR;SRPR gene;Sralpha|C1420414|||C1420414|HUGO;MTH;OMIM|||  
DP|data processing|C0868941|||C0868941|LCH;MTH;NCI|||1  
DP|debonding pliers|||1  
DP|deep pulse|||1  
DP|definitive procedure|||1  
DP|degradation product|||1  
DP|degree of polymerisation;degree of polymerization|||1|0.1274|1  
DP|delayed puberty|C0034012|||1|0.0059|  
DP|deltopectoral|C0450110|||1  
DP|delusional parasitosis|||1|0.0069|  
DP|dementia praecox|C0036341|||1  
DP|dementia pugilistica|C0149843|||1  
DP|dense plate|||1  
DP|dental prosthesis|C0162686;C1316489|||1  
DP|dental prosthodontics|||1  
DP|dermal papilla|C0221931;C1282636|||1|0.0264|  
DP|dermatofibrosarcoma protuberans|C0392784|||1|0.0118|

DP|desmoplakin|C0057555;C1414172|||||1|0.0264|  
DP|desquamative pneumonia|||||||1  
DP|developed pressure|||||||1  
DP|dexamethasone pretreatment|||||||1  
DP|diabetes-prone|||||1|0.0754|  
DP|diabetic polyneuropathy|C0271680|||||1|0.0108|  
DP|diaphragmatic plaque|||||||1  
DP|diastolic pressure|C0428883|||||||1  
DP|differential pressure||1|0.002|||||  
DP|diffuse precipitation|||||||1  
DP|diffuse pressure|||||||1  
DP|diffusion pressure|||||||1  
DP|digestible protein|||||||1  
DP|diminutive polyp|||||||1  
DP|diphosgene|C0601846|||C0601846|MSH|||1  
DP|diphosphate|C0034320|||C0034320|CHV;CSP|||1  
DP|dipropionate|||||||1  
DP|direct puncture|||||||1  
DP|directed percolation|||||1|0.0157|  
DP|directional preponderance|||||1|0.0235|1  
DP|disability pension|||||||1  
DP|discharge planning|C0012622|||||||1  
DP|discriminating power|||||||1  
DP|disopyramide|C0012702|||||1|0.0411|  
DP|disopyramide phosphate|C0700534|||||1|0.0049|  
DP|displaced person|||||||1  
DP|distal pancreatectomy|C0176940|||C0176940|ICD9CM;NCI;SNOMEDCT|1|0.0118|1  
DP|distal phalanx|C0576464|||C0576464|SNOMEDCT|||1  
DP|distal pit|||||||1  
DP|distopulpal|||||||1  
DP|distortion product|||||1|0.0147|  
DP|donor's plasma|C0860067|||||||1  
DP|dopamine|C0013030;C0201989|||||1|0.0088|  
DP|dorsal|C0205095|||||1|0.0088|  
DP|dorsal prostate|||||1|0.0137|  
DP|dorsalis pedis||1|0.996|||||1  
DP|double pneumonia|||||||1  
DP|double positive|||||1|0.1126|  
DP|double potential|||||1|0.0059|  
DP|double product|||||1|0.0362|  
DP|driving pressure|||||||1  
DP|dry pint|C2348351|||C2348351|HL7V3.0;NCI|||  
DP|dynamic programming|||||1|0.0088|  
DP|dyspnea|C0013404|||||||1  
DP|left ventricular developed pressure|||||||1|0.0137|  
DP|patients|C0030705|||||1|0.0147|  
DP|pattern|C0449774|||||1|0.0147|  
DP|phase|C0205390|||||1|0.0088|  
DP|pressures|C0033095;C0460139|||||1|0.0108|  
DP|prostaglandin D2 receptor (DP)|||C1419059|HUGO|||  
DP|protein|C0033684|||||1|0.0118|  
DP|receptor|C0597357|||||1|0.0118|  
DP|signal recognition particle receptor (docking protein)|||C1420414|HUGO|||  
DT|(drug) DT||1|0.006|||||  
DT|2'-Deoxythymidine;2'-Deoxythymidine;2'-deoxythymidine;2'-deoxythymidine  
(dT);DThyd;Deoxythymidine;deoxythymidine;Thymidine Deoxyriboside;thymidine  
deoxyriboside|C0086126|||C0086126|CHV;MSH;MTH;NCI;PDQ|1|0.0234|1

DT|3,4-dihydroxyphenylalaninechrome tautomerase||||C0114832|MSH|||  
DT|BP240;BPA;BPAG1;BULLOUS PEMPFIGOID ANTIGEN 1;CATX-15;DST  
gene;DYSTONIN;dystonin;FLJ13425;FLJ21489;FLJ30627;FLJ32235;KIAA0728;MACF2|C15393  
12|||C1539312|HUGO;MTH;OMIM|||  
DT|CHEMOTHER|||C0013216|MSH|||  
DT|CT - Chemotherapy;DT;dT;dt;Pharmacological Treatment;Pharmacological  
Treatments;Treatment With Medication;chemotherapy procedures;drug therapy  
treatment;medication therapy;medications therapy;therapy  
medication;pharmacotheapeutics|C0013216|||C0013216;C0013217;C0040077;C0086126;C  
0114832;C0305059;C0678226;C1539312;C2926610|AOD;CHV;LNC;MSH;NCI;OMIM;PDQ;SNOMEDC  
T|||  
DT|Chemotherapies;Chemotherapy;chemotherapies;chemotherapy|C0013216;C0013217;C03  
92920|||C0013216;C0013217|AOD;CHV;CSP;LCH;LNC;MEDLINEPLUS;MSH;SNOMEDCT|||  
DT|DCT;Tyrosinase-Related Protein 2;Tyrosinase-Related Protein-2;tyrosinase-  
related protein-2;dopachrome  
tautomerase|C0114832;C1413933|||C0114832|MSH;NCI;PDQ|||  
DT|DMH|||C1539312|OMIM|||  
DT|DRUG THER;THER DRUG|||C0013216;C0013217|MSH|||  
DT|DST|C0430115;C1539312|||C1539312|HUGO;OMIM|||  
DT|DT - Drug therapy|||C0013216|SNOMEDCT|||  
DT|DT toxoid;Diphtheria and tetanus toxoid  
adsorbed|C0305059|||C0305059|MTH;SNOMEDCT|||  
DT|DYSTONIA MUSCULORUM, MOUSE, HOMOLOG OF|||C1539312|OMIM|||  
DT|Delirium Tremens;delirium  
tremens|C0001957|1|0.258|C0001957|AOD;CHV;COSTAR;CSP;CST;DXP;ICD9CM;MSH;MTHICD9;  
NDFRT;SNOMEDCT|1|0.0292|1  
DT|Diphtheria and tetanus toxoid adsorbed (product)|||C0305059|SNOMEDCT|||  
DT|Diphtheria and tetanus toxoid adsorbed (substance)|||C0305059|SNOMEDCT|||  
DT|Dopachrome D-isomerase;Dopachrome delta-isomerase;Dopachrome  
isomerase;dopachrome isomerase;EC5.3.3.12;L-Dopachrome Delta-Isomerase;L-  
Dopachrome Tautomerase;dopachrome conversion factor;dopachrome  
oxidoreductase|C0114832|||C0114832|MSH;MTH;NCI;SNOMEDCT|||  
DT|Dopachrome isomerase (substance)|||C0114832|SNOMEDCT|||  
DT|Drug Therapies;Drug Therapy;Drug therapy;Drug therapy NOS;Therapies,  
Drug;Therapy, Drug;drug therapies;drug therapy;drugs  
therapies;Pharmacotherapies;Pharmacotherapy;pharmacotherapies;pharmacotherapy|C0  
013216;C0013217|||C0013216;C0013217|AOD;CHV;CSP;HL7V3.0;MEDLINEPLUS;MSH;MTH;NCI;  
SNOMEDCT|||  
DT|Drug therapy (procedure);Drug therapy NOS (procedure)|||C0013216|SNOMEDCT|||  
DT|Due To;Due to;due;due to|C0678226;C3146286|||C0678226|CHV;MTH;NCI;SNOMEDCT|||  
DT|Due to (attribute)|||C0678226|SNOMEDCT|||  
DT|PHARMACOTHER|||C0013216|MSH|||  
DT|Resulting from;resulting from|||C0678226|CHV;SNOMEDCT|||  
DT|Sabin-Feldman dye test|||||1|0.0187|  
DT|Salmonella typhimurium definitive type|||||1|0.0047|  
DT|TDR;TdR|C0040077;C0086126|||C0040077;C0086126|NCI;PDQ|||  
DT|THYMIDINE;Thymidin;Thymidine;thymidin;thymidine|C0040077|||C0040077|AOD;CHV;C  
SP;LCH;LNC;MSH;MTH;NCI;NDFRT;PDQ;SNOMEDCT|1|0.0398|  
DT|TRP-2;TRP2|C0114832;C1150342;C1421166|||C0114832|NCI;PDQ|||  
DT|TRP-2 protein, tyrosinase-related|||C0114832|MSH|||  
DT|TYRP2|C0114832;C1413933;C2826556|||C0114832|NCI|||  
DT|Thymidine (substance)|||C0040077|SNOMEDCT|||  
DT|Thymidine [Chemical/Ingredient]|||C0040077|NDFRT|||  
DT|decayed teeth|C0011334|||||1|0.0117|  
DT|deceleration time|||||1|0.1146|  
DT|decidual tissue|||||1|0.007|  
DT|defibrillation threshold|||||1|

DT|definitive phage type|||||1|0.0164|  
DT|depression of transmission|||||1|  
DT|desmoid tumor|C0079218|||C0079218|CHV;NCI;OMIM;PDQ|1|0.0082|  
DT|developed tension|||||1|0.0819|  
DT|dietary thermogenesis|||||1|  
DT|differently tested|||||1|  
DT|diffraction tomography|||||1|0.0105|  
DT|diffusion tension|||||1|  
DT|diffusion tensor|||||1|0.0491|1|  
DT|diltiazem|C0012373|||C0012373|AOD;CHV;CSP;LNC;MSH;MTHSPL;NCI;NDFRT;RXNORM;SNO  
MEDCT;USPMG;VANDF|||  
DT|diphtheria and tetanus toxoids|||||1|0.0187|  
DT|diphtheria  
toxin|C0012550|||C0012550|CSP;LCH;MSH;NCI;NDFRT;SNOMEDCT|1|0.2632|1|  
DT|diphtheria toxoid|C0012551|||C0012551|CHV;CSP;MSH;NDFRT;SNOMEDCT;VANDF|||  
DT|diphtheria-tetanus||1|0.672|||1|0.0257|1|  
DT|diploÃ« thickness|||||1|  
DT|dipole tracing|||||1|0.0105|1|  
DT|discharge tomorrow|||||1|  
DT|dispensing tablet|||||1|  
DT|distal tubule;distal tubules|||||1|0.0374|1|  
DT|distance test|||||1|  
DT|dorsalis tibialis|||||1|  
DT|double tachycardia|||||1|  
DT|doubling time|C2986483|||C2986483|NCI|1|0.1205|1|  
DT|drive for thinness|||||1|0.0129|  
DT|drug treatment (drug therapy)|||C0013216|AOD|||  
DT|dt - divisor|C2926610|||C2926610|MTH|||  
DT|duration of tetany|||||1|  
DT|dye test|C0441697|||C0441697|CHV;LNC;SNOMEDCT|||1|  
DT|dystonia musculorum|||||1|0.0292|  
DT|genetically dystonic|||||1|0.0152|  
DT|impedance detection times|||||1|0.0058|  
DT|pharmacologic therapy;pharmacotherapeutic|C0013217|||C0013217|MSH;MTH|||  
DT|resulting|C0678226|||C0678226|CHV|||  
DT|threshold|C0449864|||1|0.0199|  
DT|treatment|C0039798;C0087111;C1522326;C1533734;C1705169;C3161471|||||1|0.0152|  
DT|vaccine|C0042210;C1552558|||||1|0.0105|  
DTR|(drug) DTR||1|0.002|||||  
DTR|DIPHtheria TOXIN RECEPTOR;Diphtheria Toxin Receptor;Diphtheria toxin  
receptor;diphtheria toxin receptor;diphtheria toxin receptors;receptor,  
diphtheria toxin;HB-  
EGF;HBEGF|C0058402;C1539630|||C0058402;C1539630;C1704816|HUGO;MSH;MTH;NCI;OMIM|1  
|1|  
DTR|DT-  
R;DTR;dtr|C0058402;C1704816|||C0058402;C0489815;C1148175;C1539630;C1704816;C2681  
647|HUGO;LNC;NCI;OMIM|||  
DTR|DTR Gene;Diphtheria Toxin Receptor Gene;Diphtheria Toxin Sensitivity  
Gene;HBEGF wt Allele;Heparin-Binding EGF-Like Growth Factor wt  
Allele|C1704816|||C1704816|MTH;NCI|||  
DTR|DTR Protein;Diphtheria Toxin Sensitivity;HB-EGF precursor;heparin-binding  
epidermal growth factor-like growth factor  
precursor|C0058402|||C0058402|MSH;NCI|||  
DTR|DTS||||C0058402;C1704816|NCI|||  
DTR|Deep Tendon Reflex;Deep tendon reflex;Deep tendon reflexes;deep reflex  
tendon;deep reflexes tendon;deep tendon reflex;deep tendon reflexes;reflexes  
deep tendon;Myostatic Reflex|C0489815|1|0.998|C0489815|CHV;LNC;MTH;NCI|||1

DTR|Deep tendon reflex of {Reflex location};Deep tendon reflex:Finding:Point in time:{Reflex location}:Ordinal:Observed|C1148175|||C1148175|LNC;MTH|||  
DTR|Deep tendon reflex:Find:Pt:{Reflex location}:Ord:Observed|||C1148175|LNC|||  
DTR|Diphtheria Toxin Receptor (Heparin-Binding EGF-Like Growth Factor) Gene|||C1704816|NCI|||  
DTR|Diphtheria toxin receptor (heparin-binding EGF-like growth factor)|||C1539630|HUGO|||  
DTR|HBEGF Gene;HBEGF gene;HEPARIN-BINDING EGF;Heparin-Binding EGF-Like Growth Factor Gene;heparin-binding epidermal growth factor|C1539630|||C1539630|HUGO;MTH;NCI;OMIM|||  
DTR|HEGFL|C0058402;C1539630;C1704816|||C0058402;C1539630;C1704816|NCI;OMIM|||  
DTR|HEPARIN-BINDING EGF-LIKE GROWTH FACTOR;Heparin-Binding EGF-Like Growth Factor;heparin-binding EGF-like growth factor|C0058402;C0166825;C1539630|||C0058402;C1539630|HUGO;NCI;OMIM|||  
DTR|LRRC67;LRRC67 gene|C2681647|||C2681647|HUGO;MTH|||  
DTR|detorubicin|C0057578|||C0057578|MSH;NCI;PDQ|||  
DTR|leucine rich repeat containing 67|||C2681647|HUGO|||  
DUI|DUI;DUI law;DUI laws;driving under the influence laws;impaired driving laws|C0683692|||C0683692|AOD;CHV|||  
DUI|doubly uniparental inheritance|||1|0.1358|  
DUI|driving under influence;driving under the influence|C0870447|1|1|||1|0.5802|1  
DUI|driving under the influence of alcohol|||1|0.284|  
DUI|driving while intoxicated (DUI) law|||C0683692|CHV|||  
DUI|driving while intoxicated laws|||C0683692|AOD|||  
DVT|DEEP THROMBOPHLEBITIS;Deep thrombophlebitis;Deep thrombophlebitis, NOS;THROMBOPHLEBITIS DEEP;deep thrombophlebitis|C0149871;C0151950|||C0149871|CHV;CST;SNOMEDCT|||  
DVT|DEEP VEIN THROMBOPHLEBITIS;deep vein thrombophlebitis;Deep Vein Thromboses;Deep-Vein Thromboses;Thromboses, Deep Vein;Thromboses, Deep-Vein;Vein Thromboses, Deep;deep vein thromboses;Deep Venous Thromboses;Deep-Venous Thromboses;Thromboses, Deep Venous;Thromboses, Deep-Venous;Venous Thromboses, Deep;deep venous thromboses;Deep Venous Thrombosis;Deep venous thrombosis;Deep-Venous Thrombosis;THROMBOSIS VENOUS DEEP;Thrombosis, Deep Venous;Thrombosis, Deep-Venous;Venous Thrombosis, Deep;Venous thrombosis -deep;deep venous thrombosis;deep vein thrombophlebitis (DVT)|C0149871|||C0149871|CHV;COSTAR;CST;MSH;OMIM;SNOMEDCT|1|0.9951|  
DVT|DEEP VEIN THROMBOSIS;Deep Vein Thrombosis;Deep vein thrombosis;Deep vein thrombosis NOS;Deep-Vein Thrombosis;Thrombosis, Deep Vein;Thrombosis, Deep-Vein;Vein Thrombosis, Deep;deep vein thrombosis;deep-vein thrombosis;DVT - Deep vein thrombosis;deep vein thrombosis (DVT)|C0149871;C0340708|1|1|C0149871;C0340708|AOD;CHV;COSTAR;CSP;DXP;LNC;MEDLINE PLUS;MSH;MTH;MTHICD9;NCI;OMIM;SNOMEDCT|||1  
DVT|DVT;DVT NOS;dvts|C0149871;C2926618|||C0149871;C2926618|CHV;DXP;LNC;MEDLINEPLUS;MTHICD9;NCI;SNOMEDCT|||  
DVT|Deep thrombophlebitis (disorder)|||C0149871|SNOMEDCT|||  
DVT|Deep venous thrombosis (disorder)|||C0149871|SNOMEDCT|||  
DVT|Ever told by doctor that you had deep venous thrombosis|||C2926618|LNC|||  
DVT|Ever told by doctor that you had deep venous thrombosis:Find:Pt:^Patient:Ord|||C2926618|LNC|||  
DVT|Ever told by doctor that you had deep venous thrombosis:Finding:Point in time:^Patient:Ordinal|C2926618|||C2926618|LNC;MTH|||  
DVT|deep venous thrombophlebitis|||1|0.0051|  
DWI|DWI;dwi|C0598801;C1171335|||C0598801;C1171335|CHV;CSP|||

DWI|DWI (diffusion weighted imaging);diffusion weighted imaging (DWI);Diffusion weighted imaging;diffusion weighted imaging;diffusion-weighted images;diffusion-weighted imaging|C0598801|1|0.016|C0598801|CHV;CSP;MTH|1|0.5864|1  
DWI|Diffusion-weighted|||||1|0.0349|  
DWI|Diffusion-weighted magnetic resonance imaging;diffusion weighted magnetic resonance imaging (DWMRI)|C2584984|||C0598801|CHV|1|0.0864|  
DWI|Driving While Intoxicated;driving while intoxicated;driving while intoxicated (DWI)|C1171335|||C1171335|CHV;MTH|1|0.0947|1  
DWI|diffusion-|C0012222;C1696141|||||1|0.0216|  
DWI|diffusion-weighted MRI|C1136216|||||1|0.1445|  
DWI|driving under influence of alcohol or drugs|||C1171335|CHV|||  
DWI|driving while impaired||1|0.984|||1|0.0316|1  
EBL|Endemic Burkitt's lymphoma;endemic Burkitt lymphoma|C0343640|||||1|0.0642|1  
EBL|Estimated blood loss;estimated blood loss|C1443559;C2926617|1|0.998|||1|0.4404|1  
EBL|endoscopic band ligation|||||1|0.1101|1  
EBL|enzootic bovine leukosis|C0085165|||||1|0.3853|  
EBL|erythroblastic leukemia|C0023440|||||1|  
EBV|Burkitt Herpesvirus;Herpesvirus, Burkitt;Burkitt Lymphoma Virus;Burkitt's Lymphoma Virus;Burkitt's lymphoma virus;Burkitt's Lymphoma Virus;Lymphoma Virus, Burkitt;E B Virus;E-B Virus;E-B Viruses;e b virus;e-b virus;EB virus;eb virus;EBV;EBV - Epstein-Barr virus;Epstein-Barr virus EBV;epstein barr virus (EBV);Epstein Barr Virus;Epstein Barr virus;Epstein-Barr Virus;Epstein-Barr virus;Virus-Epstein-Barr;epstein barr virus;epstein-barr virus;HERPESVIRUS 4 GAMMA HUMAN;Herpesvirus 4 (gamma), Human;HHV 4;HHV-4;HUMAN HERPESVIRUS 4;Herpesvirus 4, Human;Human Herpesvirus 4;Human herpesvirus 4;herpesvirus 4, human;Human herpesvirus type 4;Infectious Mononucleosis Virus;Infectious Mononucleosis Viruses;Mononucleosis Virus, Infectious;Mononucleosis Viruses, Infectious;mononucleosis infectious virus;human herpesvirus 4 group|C0014644|1|1|C0014644|AOD;CHV;CSP;LCH;LNC;MSH;NCBI;NCI;SNOMEDCT|1|0.982|1  
EBV|Epstein-Barr|||||1|0.0058|  
EBV|Epstein-Barr viral|||||1|0.0054|  
EBV|HERPESVIRUS HUMAN 04;HUMAN HERPESVIRUS 04|||C0014644|MSH|||  
EBV|Human (gamma) herpes virus 4|C0598396|||C0014644|SNOMEDCT|||  
EBV|Human herpesvirus 4 (organism)|||C0014644|SNOMEDCT|||  
EBV|INFECT MONONUCLEOSIS VIRUS|||C0014644|MSH|||  
EBV|effective blood volume|||||1|  
EBV|electron boost volume|||||1|  
EBV|estimated blood volume|||||1|0.0028|1  
EBV|estimated breeding values|||||1|0.0041|  
ECG|2R, 3R)-2-(3,4-dihydroxyphenyl)-5,7-dihydroxy-chroman-3-yl] 3,4,5-trihydroxybenzoate|||C0059422|NCI|||  
ECG|ECG;ECG NOS;eCG;ecgs;EKG;ekgs;Electrocardiography;Electrocardiography NOS;electrocardiography|C0013798;C1623258|||C0013798;C0018064;C0059422;C1623258|AOD;CHV;CSP;LCH;LNC;MSH;MTH;MTHICD9;NCI;SNOMEDCT|||1  
ECG|ELECTROCARDIOGR|||C1623258|MSH|||  
ECG|Electrocardiogram;Electrocardiogram, NOS;Electrocardiograms;electrocardiogram;electrocardiograms|C0013798;C1547122;C1623258;C1705651|||C0013798;C1623258;C1705651|CCS;CHV;CSP;ICD9CM;MSH;MTH;MTHHH;NCI;SNOMEDCT|1|0.6407|1  
ECG|Electrocardiograph;electrocardiograph|C0013798;C0180600;C1623258|1|1|C0013798;C1623258|CHV;LCH;LNC|1|0.0216|1  
ECG|Electrocardiographic procedure;Electrocardiographic procedure, NOS|C1623258|||C1623258|SNOMEDCT|||  
ECG|Electrocardiographic procedure (procedure)|||C1623258|SNOMEDCT|||  
ECG|Electrocardiographically|||||1|0.0043|

ECG|Electrocardiography (procedure);Electrocardiography NOS (procedure)||||C1623258|SNOMEDCT|||

ECG|Electrocardiography NOS (regime/therapy)||||C1623258|SNOMEDCT|||

ECG|Epicatechin-3-Gallate;epicatechin-3-gallate;epicatechin gallate;epicatechin-3-galloyl ester|C0059422|||C0059422|MSH;MTH;NCI|1|0.0084|

ECG|Equine Chorionic Gonadotropin;equine chorionic gonadotrophin;equine chorionic gonadotropin;Equine Gonadotropins;Equine gonadotropin;Gonadotropins, Equine|C0018064|||C0018064|MSH;MTH;NCI;NDFRT|1|0.0321|

ECG|Gonadotropins, Equine [Chemical/Ingredient]||||C0018064|NDFRT|||

ECG|cis-3,3?,4?,5,7-pentahydroxyflavane 3-gallate||||C0059422|NCI|||

ECG|electrocardiogram (EKG, ECG)||||C0013798|CHV|||

ECG|electrocardiographic|||||1|0.2793|

ECG|equine CG|||||1|0.0034|

ECG|exercise electrocardiography|||||1|0.0103|

ECMO|ECMO;ecmo;ECMO (extracorporeal membrane oxygenation);ECMO - Extracorporeal membrane oxygenation;Extracorporeal membrane oxygenation [ECMO];extracorporeal membrane oxygenation (ECMO);Extracorporeal Membrane Oxygenation;Extracorporeal Membrane Oxygenations;Extracorporeal membrane oxygenation;Membrane Oxygenation, Extracorporeal;Membrane Oxygenations, Extracorporeal;Oxygenation, Extracorporeal Membrane;Oxygenations, Extracorporeal Membrane;extracorporeal membrane oxygenation;extracorporeal bypass|C0015357|1|1|C0015357|AOD;CHV;CSP;ICD9CM;MSH;MTH;MTHICD9;SNOMEDCT|1|0.9852|1

ECMO|Extracorporeal memb oxy||||C0015357|ICD9CM|||

ECMO|Extracorporeal membrane oxygenation (procedure)||||C0015357|SNOMEDCT|||

ECMO|Extracorporeal membrane oxygenator;extracorporeal membrane oxygenator|||||1|0.0148|1

ECMO|enterocytopathogenic monkey orphan|||||1

EC|(-)-

Epicatechin;Epicatechin;epicatechin|C0014485;C1881340|||C1881340|NCI|1|0.0067|

EC|(-)-Epicatechol||||C1881340|NCI|||

EC|(2R-cis)-2-(3,4-Dihydroxyphenyl)-3,4-dihydro-2H-1-benzopyran-3,5,7-triol||||C1881340|NCI|||

EC|E-CERVIC;Endocervical Route of Administration;Endocervical Route of Drug Administration;Intracervical Route of Administration|C1524042|||C1524042|MTH;NCI|||

EC|E-cadherin|C0042172;C0694872|||||1|0.0018|

EC|EC||||C0013557;C0013593;C1524042;C1881340|MSH;NCI|||

EC|ECON||||C0013557|MSH|||

EC|ECU;ECUADOR;Ecuador;ecuador|C0013593|||C0013593|AOD;CHV;CSP;LCH;MSH;MTH;NCI;SNOMEDCT|||

EC|ENDOCERVICAL;Endocervical;endocervical|C0227837;C1550252|||C1524042|NCI|||1

EC|Economic;economics|C0013556;C0013557|||C0013557|MSH;MTH|||

EC|Ecuador (geographic location)||||C0013593|SNOMEDCT|||

EC|Energy charge|||||1|0.0168|

EC|Enzyme Commission|C1709239|||||1|0.0028|1

EC|Escherichia coli|C0014834|||||1|0.0282|1

EC|Euro-Collins|||||1

EC|Euro-Collins solution|C0059905|||||1|0.0049|

EC|Eurocollins|||||1|0.0061|

EC|European Commission|||||1|0.0091|

EC|European Community|C0015179|||||1|0.0219|

EC|L-Epicatechin|C1881340|||C1881340|MTH;NCI|||

EC|adenocarcinoma|C0001418|||||1|0.002|

EC|committee|C2699414|||||1|0.0018|

EC|complex environment|||||1|0.0024|

EC|concentration|C0086045;C1446561|||||1|0.0037|

EC|contraction|C1140999|||||1|0.0026|  
EC|control|C0009932;C0243148;C1550141;C1882979;C2587213|||||1|0.0073|  
EC|effect of closing|||||||1  
EC|effective concentration|||||||1  
EC|ejection click|C0277911|||C0277911|CHV;SNOMEDCT|||1  
EC|electrical cardioversion|C0013778;C0542380|||||1|0.002|1  
EC|electrical conductivity|C0013777|||||1|0.0124|  
EC|electrocautery|C0013804|||||||1  
EC|electrochemical|||||||1|0.0112|1  
EC|electron capture|||||||1|0.0028|1  
EC|elimination capacity|||||||1|0.002|  
EC|elongation complex|||||||1|0.0018|  
EC|embryonal  
carcinoma|C0206659|||C0206659|CHV;CSP;MSH;NCI;OMIM;SNOMEDCT|1|0.1141|1  
EC|emergency contraception|C0558252|||C0558252|CHV;MSH;SNOMEDCT|1|0.0246|1  
EC|emetic center|||||||1  
EC|emulsifiable concentrate|||||||1|0.0043|  
EC|endemic cretinism|C0342200|||C0342200|CHV;MSH;MTH;MTHICD9;OMIM;SNOMEDCT|||1  
EC|endochondral|||||||1|0.002|  
EC|endocrine cell|C0229525|||C0229525|CHV;FMA;MSH;NCI;SNOMEDCT|||1  
EC|endometrial cancer|C0007103;C0476089;C1883486;C2984333|||||1|0.0108|  
EC|endometrial carcinoma|C0476089|||||1|0.0146|1  
EC|endothelial;endothelium|C0014257|||||1|0.0091|  
EC|endothelial cell;endothelial  
cells|C0225336|||C0225336|AOD;CHV;FMA;LNC;MSH;NCI;SNOMEDCT;UWDA|1|0.5197|1  
EC|energy cost|||||||1|0.0014|  
EC|enkephalin-containing|||||||1|0.0018|  
EC|enriched|C0359583|||||||1|0.0016|  
EC|enriched condition|||||||1|0.0022|  
EC|enteric-coated|||1|0.878|||1|0.0018|1  
EC|entering complaint|||||||1  
EC|enterochromaffin|||||||1|0.0197|  
EC|enterochromaffin cell|C0014355;C0524979|||||||1  
EC|enterocutaneous|||1|0.090|||1  
EC|entorhinal  
cortex|C0175196;C1289526|||C0175196;C1289526|CHV;CSP;FMA;MSH;SNOMEDCT|1|0.0499|1  
EC|entrance complaint|||||||1  
EC|environmental complexity|||||||1  
EC|enzyme-treated cell|||||||1  
EC|eosinophilic cystitis|C0742965|||||||1|0.002|  
EC|epidermal cell|C1179149|||C1179149|CHV;FMA;UWDA|||1  
EC|epirubicin|C0014582|1|0.004|||1  
EC|epithelial cell|C0014597|||C0014597|AOD;CHV;FMA;MSH;NCI;SNOMEDCT;UWDA|||1  
EC|equalization-cancellation|||||||1  
EC|esophageal cancer|C0014859;C0152018;C0546837|||||1|0.0138|  
EC|esophageal candidiasis|C0239295|||||||1|0.0012|1  
EC|esophageal carcinoma|C0152018|||C0152018|CHV;COSTAR;CST;MTH;NCI;OMIM|||1  
EC|esterified cholesterol|C0008387|||||||1|0.0077|  
EC|ether-chloroform|||||||1  
EC|ethyl carbamate|C0041964|||||||1|0.0051|  
EC|ethyl cellulose;ethylcellulose|C0059756|||||||1|0.0181|  
EC|ethyl  
chloride|C0015058|||C0015058|CHV;LCH;MSH;NCI;NDFRT;RXNORM;SNOMEDCT;VANDF|||1  
EC|excitation-contraction|||||||1  
EC|excitatory center|||||||1  
EC|experimental control|||||||1  
EC|experimental immune-mediated blepharoconjunctivitis|||||||1|0.0028|

EC|extensor carpi||1|0.004|||||  
EC|external carotid|||||||1  
EC|external conjugate|C0923007|||||||1  
EC|extracapsular|C1517049|||||||1  
EC|extracellular|C0521119|||||1|0.0168|1  
EC|extracellular compartment|||||||1  
EC|extracellular concentration|||||||1  
EC|extracorporeal|C0442087;C1522201|||||||1  
EC|extracorporeal circulation|C0015354|||||1|0.0041|  
EC|extracranial|C0580586|||C0580586|CHV;NCI;SNOMEDCT|||1  
EC|extruded cell|||||||1  
EC|eye care|C0885957|||||||1  
EC|eyes closed|||||||1  
ECT|BCECTS;BECTS;Benign Childhood Epilepsy With Centro Temporal Spikes;Benign Childhood Epilepsy With Centro-Temporal Spikes;Benign Epilepsy With Centrotemporal Spikes;Benign Rolandic Epilepsy of Childhood;CENTRALOPATHIC EPILEPSY;Centralopathic Epilepsies;Centralopathic Epilepsy;Centralopathic epilepsy;Epilepsies, Centralopathic;Epilepsy, Centralopathic;CENTROTEMPORAL EPILEPSY;Centrotemporal Epilepsies;Centrotemporal Epilepsy;Centrotemporal epilepsy;Epilepsies, Centrotemporal;Epilepsy, Centrotemporal;TEMPORAL-CENTRAL FOCAL EPILEPSY;Temporal-central focal epilepsy|C2363129|||C2363129|MSH;OMIM;SNOMEDCT|||  
ECT|BENIGN EPILEPSY OF CHILDHOOD WITH CENTROTEMPORAL SPIKES|||C2363129|OMIM|||  
ECT|BENIGN ROLANDIC EPILEPSY;Benign Rolandic Epilepsy;Benign Rolandic epilepsy;Epilepsy, Benign Rolandic;Rolandic Epilepsy, Benign|C0376532;C2363129|||C2363129|MSH;MTH;OMIM;SNOMEDCT|||  
ECT|Benign Rolandic epilepsy (disorder)|||C2363129|SNOMEDCT|||  
ECT|CONVULSIVE THER ELECTRIC|||C0013806|MSH|||  
ECT|Convulsive Therapies, Electric;Convulsive Therapy, Electric;Electric Convulsive Therapies;Electric Convulsive Therapy;Therapies, Electric Convulsive;Therapy, Electric Convulsive;electric convulsive therapy;ECS;ecs;ECT - Electroconvulsive therapy;electroconvulsive therapy (ECT);ECT therapy;ect therapy;EST - Electroshock treatment;EST therapy;Electric Shock Therapies;Electric Shock Therapy;Electric shock therapy;Shock Therapies, Electric;Shock Therapy, Electric;Therapies, Electric Shock;Therapy, Electric Shock;electric shock therapy;Electroconvulsive Therapies;Electroconvulsive Therapy;Electroconvulsive therapy;Electroconvulsive therapy NOS;Electroconvulsive therapy, NOS;Therapies, Electroconvulsive;Therapy, Electroconvulsive;electroconvulsive therapy;Electroconvulsive treatment;electroconvulsive treatment;electroconvulsive treatments;Electroplexy;Electroshock Therapies;Electroshock Therapy;Electroshock therapy;Electroshock therapy, NOS;Therapies, Electroshock;Therapy, Electroshock;electroshock therapy;Electroshock treatment;electroshock treatment;electric shock treatment;electric shock treatments;electroconvulsive shock therapy;electroplexy shock therapy;shock treatment;shock treatments;shocking treatment|C0013806|1|1|C0013806|AOD;CCS;CHV;CSP;LCH;MSH;MTH;MTHICD9;NCI;SNOMEDCT|1|0.8923|1  
ECT|ECT;ect|C0013806;C2363129|||C0013806;C2363129|AOD;CHV;CSP;MTH;MTHICD9;NCI;OMIM|||  
ECT|ECT (Psychotherapy)|||C0013806|MSH|||  
ECT|ECT PSYCHOTHER|||C0013806|MSH|||  
ECT|ELECTROCONVULSIVE THER;Electroconvulsive ther.|||C0013806|MSH;SNOMEDCT|||  
ECT|ELECTROSHOCK THER|||C0013806|MSH|||  
ECT|EST;est|||C0013806|CHV;MTHICD9|||  
ECT|Electroconvulsive therapy (procedure);Electroconvulsive therapy NOS (procedure)|||C0013806|SNOMEDCT|||

ECT|Electroconvulsive therapy (regime/therapy)|||C0013806|SNOMEDCT|||  
ECT|Emission computed tomography;emission computed  
tomography|C0040398|||1|0.0462|1  
ECT|European compression technique|||1  
ECT|SHOCK THER ELECTRIC|||C0013806|MSH|||  
ECT|ecarin clotting time|||1|0.0276|1  
ECT|ectomesenchymal chondromyxoid tumor|||1  
ECT|ectopic|C0574895|||1  
ECT|eel calcitonin|C0013668|||1|0.0076|  
ECT|electrochemotherapy|C0678054|||1|0.0179|1  
ECT|endocurietherapy|||1|0.0083|  
ECT|enhanced computed tomography|||1  
ECT|enteric-coated tablet|C0039226|||1  
ECT|euglobulin clot test|||1  
ECT|extended code therapy|||1  
ECT|extracellular tissue|||1  
EDC|1,2-Dichloroethane;1,2-dichloroethane;ethane, 1,2-dichloro-  
|||C0015081|LNC;MSH;NCI;SNOMEDCT|1|0.031|  
EDC|1,2-Dichloroethane (substance)|||C0015081|SNOMEDCT|||  
EDC|1,2-Ethylene Dichloride|||C0015081|NCI|||  
EDC|1-ethyl-3-(3-dimethylaminopropyl) carbodiimide hydrochloride|||1|0.0172|  
EDC|1-ethyl-3-(3-dimethylaminopropyl)carbodiimide|||1|0.2379|  
EDC|1-ethyl-3-[3-(dimethylamino)propyl]carbodiimide|||1|0.0862|  
EDC|1-ethyl-3-[3-(dimethylamino)propyl]carbodiimide hydrochloride|||1|0.0276|  
EDC|Dichloroethylene|C0012074;C0015081|||C0015081|NCI|||  
EDC|Due Date;Due date;due date|C2825543;C3146290|||C2825543|CHV;NCI;SNOMEDCT|||  
EDC|EDC|C0015081;C1832097;C2825543|||C0015081;C1832097;C2825543|NCI;OMIM|||  
EDC|EDC - Expected date of confinement|||C2825543|SNOMEDCT|||  
EDC|EDD|C1825027;C2825543|||C2825543|LNC|||  
EDC|EDD - Expected date of delivery;Estimated date of birth;Estimated date of  
confinement;estimated date of confinement;Expected Date of Confinement;expected  
date of confinement;baby's due date|C2825543|||C2825543|CHV;MTH;NCI;SNOMEDCT|||1  
EDC|EPIDERMAL DIFFERENTIATION COMPLEX;epidermal differentiation  
complex|C1832097|||C1832097|MTH;OMIM|1|0.0448|  
EDC|ETHYLENE DICHLORIDE;Ethylene Dichloride;Ethylene dichloride;ethylene  
dichloride;Ethane Dichloride;Ethylene Chloride;Glycol  
Dichloride|C0015081|||C0015081|LCH;MSH;MTH;NCI;SNOMEDCT|1|0.0448|  
EDC|Endocrine disrupting chemicals;endocrine disrupting  
chemical|C1568245|||1|0.0483|1  
EDC|Estimated date of delivery;estimated date of delivery;estimated delivery  
date|C2741670;C2825543|||C2825543|CHV;LNC;SNOMEDCT|||  
EDC|Estimated date of delivery (observable entity)|||C2825543|SNOMEDCT|||  
EDC|Ethylene dichloride (substance)|||C0015081|SNOMEDCT|||  
EDC|N-(3-dimethylaminopropyl)-N'-ethylcarbodiimide|||1|0.031|  
EDC|compounds|||1|0.031|  
EDC|date of confinement|||1|0.0448|  
EDC|delivery date|C2053594;C2825543|||C2825543|CHV|||  
EDC|effective dynamic compliance|||1  
EDC|electrodesiccation and curettage|||1  
EDC|emergency decontamination center|||1  
EDC|end-diastolic count|||1  
EDC|estimated date of conception|C0425966|1|1.000|C0425966|SNOMEDCT|||1  
EDC|ethanol-derived calories|||1|0.1172|  
EDC|ethyl cysteinate dimer|C2716486|||1  
EDC|expected delivery, cesarean|||1  
EDC|extensor digitorum communis|C1707982|||C1707982|NCI|1|0.2379|1

EDD|DD5;E3 UBIQUITIN PROTEIN LIGASE, HECT DOMAIN-CONTAINING,  
1;EDD1;KIAA0896;UBR5;UBR5 gene;ubiquitin protein ligase E3 component n-recognin  
5|C1825027|||C1825027|HUGO;MTH;OMIM|||  
EDD|Due Date;Due date;due date|C2825543;C3146290|||C2825543|CHV;NCI;SNOMEDCT|||  
EDD|EDC|C0015081;C1832097;C2825543|||C2825543|NCI|||  
EDD|EDC - Expected date of confinement|||C2825543|SNOMEDCT|||  
EDD|EDD|C1825027;C2825543|||C1825027;C2825543|HUGO;LNC;OMIM|||  
EDD|EDD - Expected date of delivery;Estimated date of birth;Estimated date of  
confinement;estimated date of confinement;Expected Date of Confinement;baby's  
due date|C2825543|||C2825543|CHV;MTH;NCI;SNOMEDCT|||  
EDD|End-diastolic diameter;end-diastolic diameter|||1|0.2871|1  
EDD|Estimated date of delivery;estimated date of delivery;estimated delivery  
date|C2741670;C2825543|||C2825543|CHV;LNC;SNOMEDCT|||  
EDD|Estimated date of delivery (observable entity)|||C2825543|SNOMEDCT|||  
EDD|HYD|C0020402;C1825027|||C1825027|HUGO;OMIM|||  
EDD|HYPERPLASTIC DISCS, DROSOPHILA, HOMOLOG OF|||C1825027|OMIM|||  
EDD|PROGESTIN-INDUCED PROTEIN|||C1825027|OMIM|||  
EDD|date of delivery;delivery date|C2053594;C2825543|||C2825543|CHV|1|0.1188|  
EDD|effective drug duration|||1  
EDD|electron-dense deposits|||1|0.1089|  
EDD|end-diastolic dimension|||1|0.2475|1  
EDD|endothelium-dependent dilation|||1|0.1287|1  
EDD|enzyme-digested delta|||1  
EDD|esophageal detection device|||1  
EDD|esophageal detector device|||1|0.1089|  
EDD|estimated discharge date|||1  
EDD|estimated due date|||1  
EDD|expected date of delivery||1|1.000|||1  
EDD|extended daily dialysis|||1  
ED|(drug) ED||1|0.002|||1  
ED|A & E - Accident and Emergency Department|||C0562508|SNOMEDCT|||  
ED|AED - Accident and Emergency department|||C0562508|SNOMEDCT|||  
ED|Accident and Emergency department;accident emergency department;Casualty  
department;EMERGENCY ROOM;Emergency Room;Emergency room;emergencies  
room;emergency room;emergency rooms;Emergency Department;Emergency  
department;emergency  
department|C0562508|1|0.992|C0562508|AOD;CHV;HL7V3.0;LNC;MTH;NCI;SNOMEDCT|1|0.59  
07|1  
ED|Accident and Emergency department (environment)|||C0562508|SNOMEDCT|||  
ED|Dysfunction, Erectile;Erectile Dysfunction;Erectile dysfunction;dysfunction  
erectile;erectile dysfunction;erectile  
dysfunctions|C0242350;C1961100|1|0.002|C0242350;C1961100|CHV;CSP;MEDLINEPLUS;MSH  
;MTH;NCI;NDFRT;OMIM;SNOMEDCT|1|0.2244|1  
ED|ED|C0242350;C0562508;C1547353|||C0013622;C0242350;C0562508;C1547353|LNC;MEDLI  
NEPLUS;MSH;NCI|||  
ED|EDUC|||C0013622|MSH|||  
ED|Education;education|C0013621;C0013622;C0013658;C0039401|||C0013622|MSH;NCI|||  
1  
ED|Educational aspects|C0013622|||C0013622|MTH|||  
ED|Emergency department (DEEDS)|||C0562508|LNC|||  
ED|Encapsulated Data Data Type;Encapsulated data - Data  
types|C1547353|||C1547353|MTH;NCI|||  
ED|Encapsulated data|C1547353;C1548310|||C1547353|HL7V2.5|||  
ED|Entner-Doudoroff|||1|0.0041|1  
ED|Erectile Dysfunction [Disease/Finding]|||C0242350|NDFRT|||  
ED|Failure of erection;IMPOTENCE;Impotence;Impotence, NOS;impotence;Impotence,  
Male;Male Impotence;Impotence, Male Sexual;Male Sexual Impotence;Sexual

Impotence, Male;Impotent;impotent;Male Erectile Disorder;Male erectile disorder;male erectile disorder;PENILE ERECTION IMPAIRMENT;Sexual impotence;Sexual impotence, NOS;sexual impotence;dysfunction erection;erection dysfunction|C0242350|||C0242350|AOD;CHV;COSTAR;CSP;CST;DXP;LCH;MEDLINEPLUS;MSH;MTHICD9;NCI;NDFRT;OMIM;QMR;SNOMEDCT|||

ED|Impotence (disorder)|||C0242350|SNOMEDCT|||

ED|Male erectile disorder (disorder)|||C0242350|SNOMEDCT|||

ED|Sexual impotence (finding)|||C0242350|SNOMEDCT|||

ED|[X] Male erectile disorder;[X]Male erectile disorder|||C0242350|SNOMEDCT|||

ED|deprivation|C0871712|||1|0.0021|

ED|duration|C0449238;C2926735|||1|0.0023|

ED|dysfunctioning erectile|||C0242350|CHV|||

ED|early differentiation|||1|

ED|early distal|||1|0.0023|

ED|eating disorder;eating disorders|C0013473|||1|0.0301|1

ED|ectodermal dysplasia|C0013575|||C0013575|CHV;LCH;MSH;MTH;NCI;NDFRT;OMIM;SNOMEDCT|1|0.0044|1

ED|ectopic depolarization|||1|

ED|edema|C0013604;C1717255|||1|

ED|edge detection|||1|

ED|effective diameter|||1|

ED|effective dose|||1|0.0048|1

ED|effector domain|C0682970|||1|0.0011|

ED|elbow disarticulation|C0408839|||C0408839|CHV|||1

ED|electrodiagnosis|C0013816|||1|

ED|electrodialysis|C0683122|||C0683122|AOD|1|0.003|1

ED|electron diffraction|||1|0.0037|1

ED|elemental diet|C0012163|||1|0.0087|1

ED|embryonic day|||1|0.0333|

ED|embryonic death|||1|

ED|emotional defensiveness|||1|

ED|emotional disorder|C0233459|||C0233459|CHV;CSP;MTH;SNOMEDCT|||1

ED|emotional disturbance|C0013985|||1|

ED|emotionally disturbed|C0677660;C0677661|||C0677660;C0677661|CHV;SNOMEDCT|||1

ED|end diastole;end-diastole|C1562146|||1|0.0119|1

ED|end-diastolic|C0442709|||1|0.0177|

ED|endogenous depression|C0011573|||1|0.0021|

ED|endolymphatic duct|C0014167|||1|0.0023|

ED|energy density|||1|0.0069|

ED|enteric drainage|||1|0.0034|

ED|entering diagnosis|||1|

ED|enumeration district|||1|0.0023|

ED|enzyme deficiency|C0149676|||C0149676|CHV;COSTAR;CSP;NCI|||1

ED|epidural|C0812144|||C0592511;C0812144;C1283259;C1550254|CHV;HL7V2.5;NCI;SNOMEDCT|||1

ED|epileptiform discharge|||1|

ED|epithelial defect|||1|

ED|epithelial dysplasia|C0878500|||1|0.0037|

ED|equilibrium dialysis|C1553177|||1|0.0041|1

ED|equine dermis|||1|

ED|equivalent dose|||1|

ED|erythema dose|||1|

ED|erythrocyte deformability|C0014774|||1|0.0016|

ED|essential dynamics|||1|0.0021|

ED|ethyldichloroarsine|||1|

ED|ethylenediamine|C0015091|||1|

ED|evidence of disease|||1|

ED|exertional dyspnea|C0231807|||C0231807|CHV;OMIM;SNOMEDCT|||1  
ED|exit dose|||||1  
ED|exponential distribution|C1711243|||C1711243|NCI|||  
ED|extensive disease|C0849867|||C0849867|NCI|1|0.0245|1  
ED|extensor  
digitorum|C0224268;C1304999|1|0.002|C0224268;C1304999|CHV;FMA;SNOMEDCT;UWDA|||1  
ED|external diameter|C2314971|||C2314971|SNOMEDCT|1|0.0025|1  
ED|extra-low dispersion|||||1  
ED|impotents|||C0242350|CHV|||  
EEG|Brain electrical activity;electrical activity of the  
brain|C0234388|||||1|0.0044|  
EEG|EEG;EEG, NOS;EEG - Electroencephalography;eeg  
electroencephalography;electroencephalography  
(EEG);Electroencephalography;electroencephalography|C0013819|||C0013819;C1552380  
;C1611834;C1851758|AOD;CHV;CSP;HL7V3.0;LCH;LNC;MSH;MTH;NCI;OMIM;SNOMEDCT|1|0.162  
3|1  
EEG|EEG - Technician, Other - NUCCProviderCodes|||C1611834|MTH|||  
EEG|ELECTROENCEPHALOGR|||C0013819|MSH|||  
EEG|ELECTROENCEPHALOGRAPHIC PATTERNS|C1851758|||C1851758|MTH;OMIM|||  
EEG|Electroencephalogram;Electroencephalogram, NOS;electro-  
encephalogram;electroencephalogram;electroencephalograms;Electroencephalogram  
(EEG)|C0013819;C1527380;C1547121;C1704279|||C0013819;C1527380;C1704279|CCS;CHV;I  
CD9CM;MSH;MTH;NCI;SNOMEDCT|1|0.4853|1  
EEG|Electroencephalogram (procedure)|||C0013819|SNOMEDCT|||  
EEG|Electroencephalographic activity|||||1|0.0035|  
EEG|Electroencephalography (procedure)|||C0013819|SNOMEDCT|||  
EEG|Specialist / Technologist - EEG|||C1552380|MTH|||  
EEG|electro-encephalographic;electroencephalographic|||||1|0.3136|  
EEG|electroencephalograph|C0443310|1|1.000|||1|0.0238|1  
EEG|electroencephalographically|||||1|0.002|  
EEG|video-electroencephalographic|||||1|0.0026|  
EEG|video-electroencephalography|||||1|0.0024|  
EF|early follicular|||||1|0.0472|  
EF|eccentric fixation|C0262461|||||1  
EF|ectopic focus|||||1  
EF|edema factor|C0105042;C0962274|||C0105042;C0962274|MSH;MTH;SNOMEDCT|||1  
EF|ejection fraction;ejection  
fractions|C0489482;C2700378|1|0.998|C0489482;C2700378|CHV;LNC|1|0.1639|1  
EF|elastic fiber|C0230899|||||1  
EF|elastic fibril|||||1  
EF|elbow flexor||1|0.002|||1  
EF|electric field|C0337037|||C0337037|CHV;CSP;SNOMEDCT|1|0.0861|1  
EF|elongation factor|C0086206|||C0086206|CHV;CSP;MSH|1|0.1722|1  
EF|embryo fibroblast|||||1  
EF|embryofetal|||||1  
EF|emergency facility|||||1  
EF|emotional factor|||||1  
EF|encephalitogenic factor|||||1  
EF|endothoracic fascia|C0225799|||C0225799|FMA;MTH;SNOMEDCT;UWDA|||1  
EF|endurance factor|||||1  
EF|enrichment factors|||||1|0.0361|  
EF|enteral feeding|C0086225|||||1|0.0167|  
EF|eosinophilic  
fasciitis|C0264005|||C0264005|CHV;MTHICD9;OMIM;QMR;SNOMEDCT|1|0.1417|1  
EF|eosinophilic folliculitis|C0744066|||||1|0.025|  
EF|epithelial focus|||||1  
EF|equivalent focus|||||1

EF|erectile function|||||1|0.0667|  
 EF|erythroblastosis  
 fetalis|C0014761|||C0014761|CHV;CSP;CST;MSH;NDFRT;SNOMEDCT|||1  
 EF|erythrocytic fragmentation|||||1  
 EF|escape focus|||||1  
 EF|essential findings|||||1  
 EF|executive function;executive functioning|C0935584|||||1|0.1611|  
 EF|exophthalmic factor|||||1  
 EF|exoplasmic face|||||1|0.0194|  
 EF|exposure factor|||||1  
 EF|extended field|||||1  
 EF|external fixation|C0407333|||||1|0.0306|  
 EF|extra food|||||1  
 EF|extrafine|||||1  
 EF|extrinsic factor|||||1  
 EF|fluid|C0005889;C0302908;C0444611;C1704353|||||1|0.0333|  
 EGD|Combined upper GI endoscopy|||C0079304|SNOMEDCT||  
 EGD|EGD;egd;egds;Esophagogastroduodenoscopies;Esophagogastroduodenoscopy;Oesopha  
 gogastroduodenoscopy;esophagogastroduodenoscopy;oesophagogastroduodenoscopy;Fibe  
 roptic esophagogastroduodenoscopy;Fibreoptic oesophagogastroduodenoscopy;Upper  
 GI endoscopy;endoscopy gi upper;endoscopy upper gi;upper gi endoscopy;Upper  
 Gastrointestinal endoscopy;Upper gastrointestinal endoscopy;upper  
 gastrointestinal endoscopy;Upper gastrointestinal tract examination;upper  
 digestive system  
 endoscopy|C0079304|1|1|C0079304|AOD;CHV;CSP;LNC;MSH;MTH;MTHICD9;MTHMST;NCI;SNOME  
 DCT|1|0.9324|1  
 EGD|Endoscopic examination of esophagus, stomach and duodenum;Endoscopic  
 examination of oesophagus, stomach and duodenum|||C0079304|SNOMEDCT||  
 EGD|Endoscopic examination of esophagus, stomach and duodenum  
 (procedure)|||C0079304|SNOMEDCT||  
 EGD|Endoscopic examination of upper GI tract|||C0079304|SNOMEDCT||  
 EGD|Esophagogastroduodenoscopy (procedure);Oesophagogastroduodenoscopy  
 (procedure)|||C0079304|SNOMEDCT||  
 EGD|Fiberoptic esophagogastroduodenoscopy (procedure);Fibreoptic  
 oesophagogastroduodenoscopy (procedure)|||C0079304|SNOMEDCT||  
 EGD|OGD - Esophagogastroduodenoscopy;OGD -  
 Oesophagogastroduodenoscopy|||C0079304|SNOMEDCT||  
 EGD|endocervical glandular dysplasia|||||1  
 EGD|upper endoscopy|C0017195|||||1|0.0676|  
 EHL|Environmental Health Laboratory|||||1  
 EHL|Evaporative heat loss|||||1|0.1111|  
 EHL|effective half-life|C2986842|||||1  
 EHL|electrohydraulic lithotripsy|C2960072|||C2960072|SNOMEDCT|1|0.5802|1  
 EHL|endogenous hyperlipidemia|C0020480|||||1  
 EHL|endoscopic hemorrhoid ligation|||||1  
 EHL|essential hyperlipidemia|||||1  
 EHL|extensor hallucis  
 longus|C0224466;C1305069|1|1.000|C0224466;C1305069|CHV;FMA;SNOMEDCT;UWDA|1|0.308  
 6|1  
 EKG|ECG;ECG NOS;ecgs;EKG;ekgs;Electrocardiography;Electrocardiography  
 NOS;electrocardiography|C0013798;C1623258|||C0013798;C1623258|AOD;CHV;CSP;LCH;LN  
 C;MSH;MTH;MTHICD9;NCI;SNOMEDCT|1|0.0595|1  
 EKG|ELECTROCARDIOGR|||C1623258|MSH||  
 EKG|Electrocardiogram;Electrocardiogram,  
 NOS;Electrocardiograms;electrocardiogram;electrocardiograms|C0013798;C1547122;C1  
 623258;C1705651|||C0013798;C1623258|CCS;CHV;CSP;ICD9CM;MSH;MTH;MTHHH;NCI;SNOMEDC  
 T|1|0.7135|1

EKG|Electrocardiograph;electrocardiograph|C0013798;C0180600;C1623258|1|1|C0013798;C1623258|CHV;LCH;LNC|||1  
EKG|Electrocardiographic procedure;Electrocardiographic procedure, NOS|C1623258|||C1623258|SNOMEDCT|||  
EKG|Electrocardiographic procedure (procedure)|||C1623258|SNOMEDCT|||  
EKG|Electrocardiography (procedure);Electrocardiography NOS (procedure)|||C1623258|SNOMEDCT|||  
EKG|Electrocardiography NOS (regime/therapy)|||C1623258|SNOMEDCT|||  
EKG|electrocardiogram (EKG, ECG)|||C0013798|CHV|||  
EKG|electrocardiographic|||1|0.227|  
EMG|ELECTROMYOGR|||C0013839|MSH|||  
EMG|ELECTROMYOGRAPH, DIAGNOSTIC|||C0180677|SPN|||  
EMG|EM-Electromyography;EMG;EMG - Electromyography;electromyography emg;Electromyographies;Electromyography;Electromyography, NOS;electromyography|C0013839|||C0013839;C0180677;C0200204|AOD;CHV;CSP;ICD9CM;LCH;LNC;MSH;MTH;MTHCH;MTHICD9;NCI;SNOMEDCT|||1  
EMG|Electromyogram examination of eye;Electromyogram of eye;Electromyogram of eye [EMG];Ocular electromyography;Oculoelectromyography with medical evaluation|C0200204|||C0200204|ICD9CM;MTH;SNOMEDCT|||  
EMG|Electromyogram examination of eye (procedure)|||C0200204|SNOMEDCT|||  
EMG|Electromyogram examination of eye (regime/therapy)|||C0200204|SNOMEDCT|||  
EMG|Electromyographic;electromyographic|||1|0.7856|1  
EMG|Electromyographs;electromyograph;electromyographs;electromyograph (EMG)|C0180677|||C0180677|CHV;MTH|1|0.0227|1  
EMG|Electromyography (procedure)|||C0013839|SNOMEDCT|||  
EMG|Electromyography (regime/therapy)|||C0013839|SNOMEDCT|||  
EMG|electromyograph|||1|1.000|||1  
EMG|electromyogram|C2945634|||C2945634|CHV;LNC;SNOMEDCT|1|0.0073|1  
EMG|electromyographi|||C0013839|CHV|||  
EMG|electromyographic activity|||1|0.0491|  
EMG|electromyographical|||1|0.0091|  
EMG|electromyographically|||1|0.0039|  
EMG|emergency|C0013956;C0175673;C2745965|||1|1  
EMG|essential monoclonal gammopathy|||1|1  
EMG|exomphalos, macroglossia, gigantism|||1|1  
EMG|experimental myasthenia gravis|C0752087|||1|0.0033|  
EMG|eye movement gauge|||1|1  
EMG|surface electromyogram|||1|0.0555|  
EMG|surface electromyography|C0430815|||1|0.0634|  
EMLA|EMLA;EMLA [brand name];Eutectic Mixture of Local Anaesthetics;Eutectic Mixture of Local Anesthetics;eutectic mixture of local anesthetics|C0059079|1|1|C0059079|CHV;MSH;MTH;NCI;PDQ;RXNORM|1|0.9067|1  
EMLA|eutectic mixture of lidocaine and prilocaine|||1|0.0933|  
EMLA|eutectic mixture of lidocaine and prilocaine (EMLA)|||C0059079|CHV|||  
EMS|EMERGENCY MED SERV;EMERGENCY SERV MED;MED SERV EMERGENCY;SERV EMERGENCY MED|||C0013961|MSH|||  
EMS|EMERGENCY SERVICES;Emergency Services;Emergency service;emergency service|C0013961|||C0013961|CHV;HCPCS;LCH|||  
EMS|EMS|C0013961;C0015063|||C0013961;C0015063|LNC;NCI|||  
EMS|Electromyostimulation|||1|0.0146|  
EMS|Emergency Medical Service;Emergency Medical Services;Emergency Service, Medical;Emergency Services, Medical;Emergency medical service;Emergency medical services;Medical Emergency Service;Medical Emergency Services;Medical Service, Emergency;Medical Services, Emergency;Service, Emergency Medical;Service, Medical Emergency;Services, Emergency Medical;Services, Medical Emergency;emergency medical service;emergency medical

services|C0013961;C1555738|1|1|C0013961|CHV;LCH;MEDLINEPLUS;MSH;MTH;SNOMEDCT|1|0.4595|1

EMS|Emergency medical services (qualifier value)||||C0013961|SNOMEDCT|||

EMS|Ethyl Mesilate;Ethyl Mesylate;Ethylmesilate;Ethylmesylate;Mesilate, Ethyl;Mesylate, Ethyl;Ethyl Methanesulfonate;Ethylmethane Sulfonate;Methanesulfonate, Ethyl;Sulfonate, Ethylmethane;ethyl methane sulfonate;ethyl methane sulphonate;ethyl methanesulfonate;ethyl methanesulphonate;ethylmethane sulfonate;ethylmethane sulphonate;ethylmethane sulphonate;ethylmethanesulfonate;ethylmethanesulphonate;Methanesulfonic acid, ethyl ester|C0015063|||C0015063|MSH;MTH;NCI;NDFRT|1|0.3043|1

EMS|Ethyl Methanesulfonate [Chemical/Ingredient]|||C0015063|NDFRT|||

EMS|care emergency;emergency care|C0013961;C0013969;C1527398|||C0013961|CHV|||

EMS|early emergency specimen|||1

EMS|early morning stiffness|||1

EMS|electrical muscle stimulation|||1|0.0061|1

EMS|electrical muscle stimulator|||1

EMS|electrophoretic mobility shift|||1|0.0085|

EMS|emergency medical system|||1|0.0195|1

EMS|empty spiracles|||1|0.0103|

EMS|encephalo-myo-synangiosis;encephalomyosynangiosis|||1|0.0152|1

EMS|endometriosis|C0014175|||C0014175|CCS;CHV;COSTAR;CSP;CST;DXP;ICD9CM;LCH;MEDLINEPLUS;MSH;NCI;NDFRT;OMIM;QMR;SNOMEDCT|||1

EMS|eosinophilia-myalgia syndrome|C0085179|||C0085179|CHV;DXP;MSH;MTH;NDFRT|1|0.0822|1

EMS|esophageal manometric sequence|||1

EMS|expandable metallic stent|||1|0.0116|

EMS|extensive|C0205231|||1|0.0073|

EMS|extensive metabolisers;extensive metabolizers|||1|0.0609|

EMS|extramedullary site|||1

EMT|3-Oct|C0083838|||C1420138|HUGO;OMIM|||

EMT|EMERGENCY MED TECHNICIAN;EMERGENCY MED TECHNICIANS;MED TECHNICIAN EMERGENCY;MED TECHNICIANS EMERGENCY;TECHNICIAN EMERGENCY MED;TECHNICIANS EMERGENCY MED|||C0013963|MSH|||

EMT|EMERGENCY MEDICAL TECHNICIAN;Emergency Medical Technician;Emergency Medical Technicians;Emergency medical technician;Emergency medical technicians;Medical Technician, Emergency;Medical Technicians, Emergency;Technician, Emergency Medical;Technicians, Emergency Medical;emergency medical technician;emergency medical technicians;EMT (emergency medical technician);emergency medical technician

(EMT)|C0013963;C1549968|1|1|C0013963;C1549968|AOD;CHV;CSP;HL7V2.5;LCH;MSH;MTH;NCI;SNOMEDCT|1|0.1744|

EMT|EMT;emt|||C0013963;C0215474;C1367389;C1420138;C1523298;C1706224|AOD;CHV;GO;HUGO;NCI;OMIM;SNOMEDCT|||

EMT|EMT ORGANIC CATION TRANSPORTER 3;EXTRANEURONAL MONOAMINE TRANSPORTER;extraneuronal monoamine transporter;SLC22A3;SLC22A3 gene|C1420138|||C1420138|HUGO;MTH;OMIM|1|0.0923|

EMT|Emergency Medicine Technician;Emergency Medicine Technicians;Technician, Emergency Medicine;Technicians, Emergency Medicine;Emergency Paramedic;Emergency Paramedics;Paramedic, Emergency;Paramedics, Emergency|C0013963|||C0013963|MSH|||

EMT|Epithelial Mesenchymal Transformation;Epithelial-Mesenchymal Transformation;Epithelial-Mesenchymal Transformations;Transformation, Epithelial-Mesenchymal;Transformations, Epithelial-Mesenchymal;epithelial-mesenchymal transformation;Epithelial Mesenchymal Transition;Epithelial-Mesenchymal Transition;Epithelial-Mesenchymal Transitions;Transition, Epithelial-Mesenchymal;Transitions, Epithelial-Mesenchymal;epithelial to mesenchymal transition;epithelial-mesenchymal transition;mesenchymal to

epithelial transition;mesenchymal-epithelial transition|C1523298||C1523298|GO;MSH;MTH|1|0.6564|  
EMT|IL2-inducible T-cell kinase;IL2-INDUCIBLE T-CELL KINASE;IL2-Inducible T-Cell Kinase;IL2-inducible T-cell kinase|C0215474;C1367389||C0215474;C1367389|HUGO;MSH;MTH;NCI;OMIM|||  
EMT|IL2-Inducible T-Cell Kinase Gene;ITK;ITK Gene;ITK gene|C1367389||C1367389|HUGO;MTH;NCI;OMIM|||  
EMT|IL2-Inducible T-Cell Kinase wt Allele;ITK wt Allele|C1706224||C1706224|MTH;NCI|||  
EMT|Kinase EMT;T-Cell-Specific Kinase;T-cell-specific kinase;Tyrosine-Protein Kinase LYK;emt protein-tyrosine kinase;inducible T cell kinase;interleukin-2 tyrosine kinase|C0215474||C0215474|MTH;NCI|||  
EMT|LYK|C0215474;C1367389;C1706224||C0215474;C1367389;C1706224|HUGO;NCI|||  
EMT|PSCTK2|||C0215474;C1367389;C1706224|HUGO;NCI|||  
EMT|Paramedic|C0013963;C0030450||C0013963|SNOMEDCT|||  
EMT|Paramedic (occupation)|||C0013963|SNOMEDCT|||  
EMT|SOLUTE CARRIER FAMILY 22 (EXTRANEURONAL MONOAMINE TRANSPORTER), MEMBER 3;solute carrier family 22 (extraneuronal monoamine transporter), member 3|||C1420138|HUGO;OMIM|||  
EMT|T-CELL ITK/TSK TYROSINE KINASE, MOUSE, HOMOLOG OF|||C1367389|OMIM|||  
EMT|T-Cell ITK/TSK Homolog|||C0215474|NCI|||  
EMT|TYROSINE KINASE EXPRESSED MAINLY IN T CELLS|||C1367389|OMIM|||  
EMT|Tyrosine-Protein Kinase ITK/TSK|||C0215474|NCI|||  
EMT|electronic medical textbook|||1  
EMT|emergency medical tag|C0013962|||1  
EMT|emergency medical treatment|||1  
EMT|endocardial mapping technique|||1  
EMT|epithelial-mesenchymal transdifferentiation|||1|0.0308|  
EMT|transitions|||1|0.0462|  
ENT|\*Entitic;Entitic|C1304535||C1304535|HL7V2.5;MTH;SNOMEDCT|||  
ENT|5'-nucleotidase, ecto (CD73)|||C1417861|HUGO|||  
ENT|CD73;E5NT;ECTO-5-PRIME NUCLEOTIDASE;NUCLEOTIDASE, ECTO-5-PRIME;NT5E;NT5E gene|C1417861||C1417861|HUGO;MTH;OMIM|||  
ENT|ENT;eNT|||C0150934;C1274038;C1304535;C1417861|CHV;HUGO;LNC;OMIM;SNOMEDCT|||  
ENT|Ear, Nose and Throat;Ear, nose and throat;ear nose and throat;ear nose throat;ear throat nose;ear-nose-throat;ears nose throat;ears, nose, throat;nose ear throat;throat nose ear;ear, nose and throat (ENT)|C0150934|1|1|C0150934|AIR;CHV;MEDLINEPLUS;MTH;SNOMEDCT|1|0.4285|1  
ENT|Ear, nose and throat structure|||C0150934|SNOMEDCT|||  
ENT|Ear, nose and throat structure (body structure)|||C0150934|SNOMEDCT|||  
ENT|Ear, nose and throat surgery;ear nose throat surgery;ear throat nose surgery;ear nose and throat (ENT)|C1274038||C1274038|CHV;CSP;MTH;SNOMEDCT|||  
ENT|Ear, nose and throat surgery (qualifier value)|||C1274038|SNOMEDCT|||  
ENT|Entitic (property)|||C1304535|SNOMEDCT|||  
ENT|Entitic (property) (qualifier value)|||C1304535|SNOMEDCT|||  
ENT|NT5|C1417861;C1417863||C1417861|OMIM|||  
ENT|NTE|C1417861;C1826637||C1417861|OMIM|||  
ENT|eN|C1417861;C2987294||C1417861|HUGO|||  
ENT|embryonic nervous tissue|||1|0.1224|  
ENT|entorhinal cortex|C0175196;C1289526|||1|0.1837|  
ENT|enzootic nasal tumor|||1  
ENT|equilibrative nucleoside transporter|||1|0.2653|  
ENT|extranodular tissue|||1  
EOMI|extraocular movements intact||1|1.000|||1  
EOMI|extraocular muscles intact|||1

EOM|EOM;eom;eoms;EXTRAOCULAR;Extraocular;extraocular|C0241886|||C0241886|CHV;DXP;NCI|||  
EOM|end of message|||||||1  
EOM|equal ocular movement|||||||1  
EOM|error of measurement|||||||1  
EOM|external otitis media|||||||1  
EOM|extraocular motion||1|1.000|||||1  
EOM|extraocular  
muscle|C0028863;C1268995|||C0028863;C1268995|CHV;CSP;FMA;NCI;SNOMEDCT;UWDA|1|0.8803|1  
EOM|organic matter||||||1|0.1197|  
EPO|1-165-Erythropoietin (human clone lambdaHEPOFL13 protein moiety), glycoform alpha|||C0357126|MSH|||  
EPO|CLGI;TIMP1 wt Allele|C1705819|||C1705819|MTH;NCI|||  
EPO|COLLAGENASE INHIBITOR, HUMAN;TIMP metallopeptidase inhibitor 1;TIMP1 Gene;TIMP1 gene|C1367459|||C1367459|HUGO;MTH;NCI;OMIM|||  
EPO|ECSF;EPO;Epo;epo;epos;EPO - Erythropoietin;ESA - Erythropoietin stimulating agent;Epoetin;Erythropoietin preparation;Erythropoietin stimulating agent|C0014822|||C0014822;C0202001;C0357126;C1366564;C1367459;C1414438;C1705819|CHV;CSP;HUGO;NCI;OMIM;PDQ;SNOMEDCT|||  
EPO|ECSF (erythrocyte colony stimulating factor)|||C0014822|CSP|||  
EPO|EOSINOPHIL PEROXIDASE;eosinophil peroxidase|C0059407;C1414438|||C0059407;C1414438|HUGO;MSH;MTH;NDFRT;OMIM|1|0.0738|  
EPO|EP|||C1366564|HUGO;OMIM|||  
EPO|EPA|||C1367459;C1705819|NCI;OMIM|||  
EPO|EPO Gene;EPO gene;Erythropoietin Gene|C1366564|||C1366564|HUGO;MTH;NCI|||  
EPO|EPO assay;Erythropoietin Measurement;Erythropoietin measurement;erythropoietin level test;erythropoietin test|C0202001|||C0202001|CHV;MTH;NCI;SNOMEDCT|||  
EPO|EPOETIN ALFA, RECOMBINANT;epoetin alfa recombinant|||C0357126|CHV;NDFRT;VANDF|||  
EPO|EPP|C0162568;C1414438|||C1414438|HUGO|||  
EPO|EPX;EPX gene;EPX-PEN|C1414438|||C1414438|HUGO;MTH;OMIM|||  
EPO|ERYTHROID POTENTIATING ACTIVITY|C1367459;C1522552|||C1367459|OMIM|||  
EPO|ERYTHROPOIETIN;Erythropoietin;erythropoietin;erythropoietins|C0014822;C0202001;C0357126;C0376541;C1755594|1|1|C0014822;C0202001;C0357126;C1366564|AOD;CHV;CSP;HUGO;LCH;LNC;MSH;MTH;MTHSPL;NCI;NDFRT;OMIM;PDQ;SNOMEDCT|1|0.9036|1  
EPO|Epidemiology Program Office|||||||1  
EPO|Epoetin Alfa;Epoetin alfa;epoetin alfa;Epoetin alfa (product);Epoetin alfa product;recombinant 1-165 erythropoietin, glycoform alpha|C0357126|||C0357126|CHV;MSH;MTH;NCI;NDFRT;PDQ;RXNORM;SNOMEDCT;USPMG|||1  
EPO|Epoetin Alfa [Chemical/Ingredient]|||C0357126|NDFRT|||  
EPO|Epoetin alfa (substance)|||C0357126|SNOMEDCT|||  
EPO|Erythrocyte Colony Stimulating Factor;erythrocyte colony stimulating factor|C0014822;C0376541|||C0014822|CSP;NCI|||  
EPO|Erythropoietin (substance)|||C0014822|SNOMEDCT|||  
EPO|Erythropoietin [Chemical/Ingredient]|||C0014822|NDFRT|||  
EPO|Erythropoietin level;erythropoietin level;erythropoietin levels|C0202001;C0427434|||C0202001|CHV;SNOMEDCT|||  
EPO|Erythropoietin measurement (procedure)|||C0202001|SNOMEDCT|||  
EPO|Erythropoietin preparation (product)|||C0014822|SNOMEDCT|||  
EPO|Erythropoietin preparation (substance)|||C0014822|SNOMEDCT|||  
EPO|Erythropoietin product|||C0014822|SNOMEDCT|||  
EPO|Erythropoietin product (product)|||C0014822|SNOMEDCT|||  
EPO|Evening Primrose Oil;evening primrose oil|C0700602|||||1|0.02|1  
EPO|HCI|||C1367459;C1705819|NCI;OMIM|||

EPO|Hematopoietin;hematopoietin|C0014822;C0202001;C0376541|||C0014822;C0202001|C  
SP;NCI|||  
EPO|TIMP|||C1367459;C1705819|NCI;OMIM|||  
EPO|TIMP1|C1367459;C2825911|||C1367459|HUGO;NCI;OMIM|||  
EPO|TISSUE INHIBITOR OF METALLOPROTEINASE  
1|C0145947;C1367459;C1522552;C2825911|||C1367459|OMIM|||  
EPO|Tissue Inhibitor of Metalloproteinase 1 (Erythroid Potentiating Activity,  
Collagenase Inhibitor) Gene|||C1367459|NCI|||  
EPO|Tissue Inhibitor of Metalloproteinase 1 (Erythroid Potentiating Activity,  
Collagenase Inhibitor) wt Allele|||C1705819|NCI|||  
EPO|epoprosteno|C0033567|||1|0.0026|  
EPO|erythropoiesis|C0014819|||C0014819|AOD;CHV;CSP;GO;LCH;MSH;NCI;SNOMEDCT|||  
EPO|exclusive provider organization|C152477|||1|  
EP|Atypical Pneumonia, Primary;Atypical Pneumonias, Primary;PNEUMONIA, PRIMARY  
ATYPICAL;Pneumonia, Primary Atypical;Pneumonias, Primary Atypical;Primary  
Atypical Pneumonia;Primary Atypical Pneumonias;primary atypical  
pneumonia|C0032302;C0702135|||C0032302|CHV;DXP;MSH;NDFRT|||  
EP|CDDP-e TI;cisplatin/epirubicin protocol|C0280609|||C0280609|MTH;NCI|||  
EP|CDDP/EPI|||C0280609|NCI;PDQ|||  
EP|CDDP/VP-16|||C0078414|NCI;PDQ|||  
EP|Cisplatin-e therapeutic implant|C0280609;C0677669|||C0280609|NCI|||  
EP|Cisplatin/Epirubicin;cisplatin/epirubicin|||C0280609|NCI;PDQ|||  
EP|Cisplatin/Etoposide;cisplatin and etoposide;cisplatin  
etoposide;cisplatin/etoposide;etoposide and cisplatin;P-VP protocol;VP-P  
protocol;VP-P chemotherapy protocol;VP-Plat;VPP;cisplatin/etoposide  
protocol|C0078414|||C0078414|CHV;MSH;MTH;NCI;PDQ|1|0.0154|  
EP|E-prostanoid|||1|0.0128|  
EP|EP|||C0014508;C0032302;C0078414;C0115922;C0280609;C1366564;C1706321|HUGO;MSH  
;NCI;OMIM;PDQ;SNOMEDCT|||  
EP|EPIDEMIOLOGICAL|||C0014508|MSH|||  
EP|EPO|||C1366564|HUGO;NCI;OMIM|||  
EP|EPO Gene;EPO gene;Erythropoietin Gene|C1366564|||C1366564|HUGO;MTH;NCI|||  
EP|EPO wt Allele;Erythropoietin wt Allele|C1706321|||C1706321|MTH;NCI|||  
EP|ERYTHROPOIETIN;erythropoietin|C0014822;C0202001;C0357126;C0376541;C1755594|||  
C0014822;C0202001;C0357126;C0376541;C1366564;C1755594|AOD;CHV;CSP;GO;HUGO;LCH;LN  
C;MSH;MTH;MTHSPL;NCI;NDFRT;OMIM;PDQ;SNOMEDCT|1|0.2156|  
EP|Eaton agent pneumonia;Eaton's agent pneumonia;Eatons agent  
pneumonia;PNEUMONIA, EATON AGENT;Endemic pneumonia;Mycoplasma pneumoniae  
pneumonia;Mycoplasmal pneumonia;PNEUMONIA, MYCOPLASMAL;mycoplasmal pneumonia;PAP  
due to Mycoplasma pneumoniae;PNEUMONIA, COLD AGGLUTININ POSITIVE;cold agglutinin  
positive pneumonia;Pneumonia due to Eaton's agent;Pneumonia due to Mycoplasma  
pneumoniae;Primary atypical pneumonia due to Mycoplasma  
pneumoniae|C0032302|||C0032302|CHV;CSP;DXP;ICD9CM;MTHICD9;SNOMEDCT|||  
EP|Electrophysiology;electrophysiology|C0013865;C1446476|1|0.996|||1|0.0164|1  
EP|Endocrine-paracrine|||1|0.0051|  
EP|Endogenous pyrogen;endogenous pyrogen;LEM;Leucocyte endogenous  
mediator;Leukocyte endogenous mediator;leukocyte endogenous mediator;leukocyte  
pyrogen|C0115922|||C0115922|CSP;MSH;MTH;SNOMEDCT|1|0.0317|1  
EP|Infection by PPLO|C0026936;C0032302|||C0032302|SNOMEDCT|||  
EP|MYCOPLASMA PNEUMONIA;Mycoplasma Pneumonia;Mycoplasma Pneumonias;Mycoplasma  
pneumonia;Pneumonia, Mycoplasma;Pneumonias, Mycoplasma;mycoplasma  
pneumonia;mycoplasmas pneumonia;pneumonia  
mycoplasma|C0026941;C0032302|||C0032302|CHV;COSTAR;MSH;MTH;NDFRT;QMR;SNOMEDCT|||  
EP|Mycoplasma pneumonia (disorder)|||C0032302|SNOMEDCT|||  
EP|Mycoplasmal pneumonia (disorder)|||C0032302|SNOMEDCT|||  
EP|PE|||C0078414|NCI;PDQ|||  
EP|PGE(2) receptors|||1|0.0031|

EP|PPLO;pplo||||C0032302|CHV;CSP|||  
EP|PVp||||C0078414|NCI;PDQ|||  
EP|Pneu mycplsm pneumoniae||||C0032302|ICD9CM|||  
EP|Pneumonia due to Mycoplasma pneumoniae (disorder)||||C0032302|SNOMEDCT|||  
EP|Pneumonia due to PLO|C0032302;C0553970|||C0032302|SNOMEDCT|||  
EP|Pneumonia, Mycoplasma [Disease/Finding]||||C0032302|NDFRT|||  
EP|bovine encephalitogenic protein|||||1|0.0026|  
EP|cisplatin and etoposide chemotherapy protocol||||C0078414|CHV|||  
EP|early phase|||||1|0.0031|  
EP|ectopic  
pregnancy|C0032987;C1315536|||C0032987|CCS;CHV;COSTAR;CSP;DXP;ICD9CM;ICPC;LNC;ME  
DLINEPLUS;MSH;MTH;NCI;NDFRT;QMR;SNOMEDCT|1|0.1068|1  
EP|edible portion|||||1|  
EP|egg production|||||1|0.0138|  
EP|electrophoresis|C0013855|||C0013855|AOD;CHV;CSP;HL7V3.0;LCH;LNC;MSH;NCI;SNOME  
DCT|||1  
EP|electrophoretic|||||1|  
EP|electrophysiologic|||||1|0.0296|1  
EP|electrophysiological|||||1|0.0143|  
EP|electroprecipitin|||||1|  
EP|elopement precaution|||||1|  
EP|emergency physician|||||1|0.0184|  
EP|emergency procedure|C1298802|||||1|  
EP|encephalitogenic peptide|||||1|0.0031|  
EP|end point|C2349179;C2826544|||C2349179|MTH;NCI|||1  
EP|endocochlear potential|C0234738|||||1|0.1058|  
EP|endoperoxide|||||1|  
EP|endorphin|C0014242;C0205752|||||1|  
EP|endoscopic papillotomy|C0085263|||||1|0.0066|  
EP|enteropeptidase|C0014366;C1418973|||C0014366;C1418973|CHV;HUGO;LNC;MSH;MTH;ND  
FRT;SNOMEDCT|||1  
EP|entopeduncular nucleus|C0228359|||||1|0.023|  
EP|environmental protection|C0242228|||||1|  
EP|enzootic pneumonia|||||1|0.0046|  
EP|enzyme product|||||1|  
EP|eosinophilic  
pneumonia|C0034068;C1527407|||C0034068;C1527407|CHV;COSTAR;CST;MSH;MTH;NCI;SNOME  
DCT|1|0.0066|1  
EP|ependymal|C0521405|||||1|  
EP|ephedrine|C0014479|||||1|0.0051|  
EP|epicardial|C0442016|||||1|  
EP|epidemiologic|C0014507;C0014508|||C0014508|MTH|||  
EP|epidemiology|C0014507;C0014508;C0699910|||C0014508|MSH|||  
EP|epirubicin|C0014582|||C0014582|CHV;MSH;MTH;NCI;NDFRT;RXNORM;SNOMEDCT;VANDF|||  
EP|epithelial|C0221908|||||1|  
EP|epithelium|C0014609|||||1|  
EP|epoxide|C0014630|||C0014630|CHV;CSP|||  
EP|equilibrium point|C0678589|||||1|0.0026|  
EP|erythrocyte protoporphyrin|||||1|0.023|1  
EP|erythrophagocytosis|C0302486|||C0302486|CHV;MTH;NCI;SNOMEDCT|||1  
EP|erythropoietic porphyria|C0162530|||C0162530|CHV;MSH;NCI;NDFRT;SNOMEDCT|||1  
EP|escape protein|||||1|0.0046|  
EP|esophageal pressure|C0232531|||C0232531|CHV;CSP;SNOMEDCT|||1  
EP|esophoria|C0152216|||||1|  
EP|estrogen-progesterone|||||1|0.0056|  
EP|etoposide phosphate|C0059874|||||1|0.0056|  
EP|etoposide plus cisplatin|||||1|0.0051|

EP|evoked potential;evoked potentials|C0015214;C0561862|||C0015214|AOD;CHV;CSP;MSH;SNOMEDCT|1|0.208|1  
EP|excretory phase|||||||1  
EP|extreme pressure|||||||1  
EP|pale ear|||||||1|0.0051|  
EP|period|C0439531;C1948053|||||1|0.0056|  
EP|phosphoenzyme|||||||1|0.0271|  
EP|phosphoenzyme intermediate|||||||1|0.0051|  
EP|phosphorylated intermediate|||||||1|0.0107|  
EP|pressure|C0033095;C0460139;C1306345|||||||1|0.0118|  
EP|pressure strain elastic modulus|||||||1|0.0097|  
EP|progesterone|C0033308;C2757070|||||||1|0.0087|  
EP|prostaglandin E|C0033559|||||||1|0.0072|  
EP|receptor|C0597357|||||||1|0.0066|  
EP|vivo electroporation|||||||1|0.0046|  
ERCP|CHOLANGIOPANCREATOGR ENDOSCOPIC RETROGRADE;ENDOSCOPIC RETROGRADE CHOLANGIOPANCREATOGR;RETROGRADE CHOLANGIOPANCREATOGR ENDOSCOPIC||||C0008310|MSH|||  
ERCP|Cholangiopancreatographies, Endoscopic Retrograde;Cholangiopancreatography, Endoscopic Retrograde;Endoscopic Retrograde Cholangiopancreatographies;Endoscopic Retrograde Cholangiopancreatography;Endoscopic retrograde cholangiopancreatography;Endoscopic retrograde cholangiopancreatography, NOS;Retrograde Cholangiopancreatographies, Endoscopic;Retrograde Cholangiopancreatography, Endoscopic;endoscopic retrograde cholangiopancreatography;ERCP (endoscopic retrograde cholangiopancreatography);ERCP - Endoscopic retrograde cholangiopancreatography;Endoscopic retrograde cholangiopancreatography [ERCP];endoscopic retrograde cholangiopancreatography (ERCP);Endoscopic retrograde cholangio-pancreatography;Endoscopic retrograde choledochopancreatography;endoscopic retrograde choledochopancreatography|C0008310|||C0008310|AOD;CHV;CSP;ICD9CM;MSH;MTH;MTHICD9;MTHMST;NCI;SNOMEDCT|1|0.9215|1  
ERCP|Consent Type - ERCP|C1548852|||C1548852|MTH|||  
ERCP|Diagnostic endoscopic retrograde examination of bile duct and pancreatic duct;Diagnostic endoscopic retrograde examination of bile duct and pancreatic duct NOS||||C0008310|SNOMEDCT|||  
ERCP|Diagnostic endoscopic retrograde examination of bile duct and pancreatic duct (procedure);Diagnostic endoscopic retrograde examination of bile duct and pancreatic duct NOS (procedure)|||C0008310|SNOMEDCT|||  
ERCP|ERCP;ERCP, NOS|C0008310;C1548852|||C0008310;C1548852|HL7V2.5;LNC;MSH;MTHICD9;MTHMST;NCI;SNOMEDCT|||  
ERCP|ERP||||C0008310|AOD|||  
ERCP|Endosc retro cholangiopa||||C0008310|ICD9CM|||  
ERCP|Endoscopic catheterisation of pancreatic duct and bile duct systems;Endoscopic catheterization of pancreatic duct and bile duct systems||||C0008310|SNOMEDCT|||  
ERCP|Endoscopic catheterization of pancreatic duct and bile duct systems (procedure)|||C0008310|SNOMEDCT|||  
ERCP|Endoscopic retrograde cholangiopancreatography (procedure)|||C0008310|SNOMEDCT|||  
ERCP|Endoscopic retrograde cholangiopancreatography (procedure) [Ambiguous]||||C0008310|SNOMEDCT|||  
ERCP|Endoscopic retrograde cholangiopancreatography -RETIRED- |||C0008310|SNOMEDCT|||  
ERCP|endoscopic retrograde cholangiography|C0193504|||||1|0.0224|

ERCP|endoscopic retrograde cholangiopancreaticography|||1|0.0318|  
ERCP|endoscopic retrograde cholangiopancreatogram|||1|0.0087|1  
ERCP|endoscopic retrograde cholangiopancreatograph||1|1.000|||1|  
ERCP|endoscopic retrograde cholangiopancreatographic|||1|0.0062|  
ERCP|endoscopic retrograde pancreatography|C0337380|||1|0.0094|  
ER|E2R - Estrogen receptor;E2R - Oestrogen receptor;Estrogen receptor  
site;Oestrogen receptor site|C0034804||C0034804|SNOMEDCT|||  
ER|EPIREGULIN;epiregulin;EREG|C0296263;C1366644||C1366644|HUGO;NCI;OMIM|||  
ER|ER;Er;ERBIUM;Erbium;erbium;Erbium  
Metallicum|C0014688||C0014239;C0014688;C0014716;C0034804;C1366644;C1414461;C152  
1863;C1706235;C1706324;C1707968|AOD;CHV;GO;HUGO;LCH;MSH;MTH;MTHSPL;NCI;NDFRT;OMI  
M;SNOMEDCT|||1  
ER|ER-Alpha|C0665341;C1521863||C1521863|NCI|||  
ER|ERA;Era|C0681698;C1414461;C1706235||C1414461;C1706235|HUGO;NCI|||  
ER|EREG Gene;EREG gene;Epiregulin Gene|C1366644||C1366644|HUGO;MTH;NCI|||  
ER|EREG wt Allele;Epiregulin wt Allele|C1706324||C1706324|MTH;NCI|||  
ER|ERI;ERITREA;Eritrea|C0014716||C0014716|AOD;MSH;MTH;NCI|||  
ER|ESR|||C1414461;C1706235|NCI;OMIM|||  
ER|ESR1|||C1414461;C1521863;C1706235|HUGO;NCI;OMIM|||  
ER|ESR1 Gene;ESR1 gene;Estrogen Receptor 1  
Gene|C1414461||C1414461|HUGO;MTH;NCI|||  
ER|ESR1 protein, human;NR3A1 protein, human;estrogen receptor 1, human;estrogen  
receptor alpha, human|C1521863||C1521863|MSH;MTH|||  
ER|ESR1 wt Allele;Estrogen Receptor 1 wt Allele|C1706235||C1706235|MTH;NCI|||  
ER|ESRA;NR3A1|C1414461;C1706235||C1414461;C1706235|HUGO;NCI;OMIM|||  
ER|ESTROGEN RECEPT;RECEPT ESTROGEN|||C0034804|MSH|||  
ER|ESTROGEN RECEPTOR;Estrogen Receptor;Estrogen Receptors;Estrogen  
receptor;Oestrogen receptor;Receptors of estrogens;Receptors, Estrogen;estrogen  
receptor;estrogen receptors;oestrogen receptor;oestrogen receptors;estrogen  
receptor  
(ER)|C0034804;C1414461;C1521863|1|0.036|C0034804;C1414461;C1521863|CHV;CSP;LNC;M  
SH;MTH;NCI;NDFRT;OMIM;PDQ;SNOMEDCT|1|0.4295|1  
ER|ESTROGEN RECEPTOR 1;Estrogen Receptor 1;estrogen receptor  
1|C1121711;C1414461;C1521863||C1414461;C1521863|HUGO;NCI;OMIM|||  
ER|ESTROGEN RECEPTOR, ALPHA;Estrogen Receptor Alpha;Estrogen receptor  
alpha|C0665341;C1414461;C1521863||C1414461;C1521863|NCI;OMIM|1|0.008|  
ER|Emergency Room;emergency  
room|C0562508|1|0.896|C0562508;C1546435|AOD;CHV;HL7V2.5;HL7V3.0;NCI|1|0.0299|1  
ER|Endoplasmic Reticulum;Endoplasmic reticulum;Endoplasmic reticulum,  
NOS;Reticulum, Endoplasmic;endoplasmic reticulum;Reticulum  
cytoplasmaticum;Reticulum endoplasmicum;endoplasmic reticulum  
(ER)|C0014239||C0014239|AOD;CHV;CSP;FMA;GO;LCH;MSH;MTH;NCI;SNOMEDCT;UWDA|1|0.43  
21|1  
ER|Endoplasmic reticulum (body structure)|||C0014239|SNOMEDCT|||  
ER|Endoplasmic reticulum (cell structure)|||C0014239|SNOMEDCT|||  
ER|Erbium (substance)|||C0014688|SNOMEDCT|||  
ER|Erbium [Chemical/Ingredient]|||C0014688|NDFRT|||  
ER|Ergastoplasm|C0014239;C0230779||C0014239|MSH;SNOMEDCT|||  
ER|Estradiol|C0014912|||1|0.0025|  
ER|Estradiol Receptor;estradiol  
receptor|C0034803;C0034804;C1521863||C0034803;C0034804;C1521863|MSH;NCI;NDFRT;S  
NOMEDCT|||1  
ER|Estrogen receptor (substance)|||C0034804|SNOMEDCT|||  
ER|Extended Release;extended release;extended-release;Extended Release Dosage  
Form;Extended Release Dose Form|C1707968|1|0.068|C1707968|MTH;NCI|1|0.0152|1  
ER|OR - Estrogen receptor;OR - Oestrogen receptor|||C0034804|SNOMEDCT|||  
ER|Receptors, Estrogen [Chemical/Ingredient]|||C0034804|NDFRT|||

ER|XR|C1707968;C1962945|||C1707968|NCI|||  
ER|early|C1279919|||1|0.0014|  
ER|early repolarization|C1997354|||1|  
ER|early response|||1|0.0008|  
ER|early reticulocyte|||1|  
ER|efficacy ratio|||1|  
ER|ejection rate|||1|  
ER|electrical resistance|C0162535;C1547024|||1|0.0007|  
ER|electroresection|||C0441536|SNOMEDCT|||1|  
ER|electrorheological|||1|0.0013|  
ER|end range|||1|  
ER|endoplasmic reticular|||1|0.001|  
ER|endoscopic resection|||1|0.0009|  
ER|endovascular repair|||1|0.0006|  
ER|energy restriction|||1|0.0032|  
ER|energy retention|||1|0.0009|  
ER|energy-restricted|||1|0.0009|  
ER|enhanced reactivation|||1|0.0011|1|  
ER|enhancement ratio|||1|0.0053|1|  
ER|environmental resistance|||1|  
ER|epigastric region|C0230185|||C0230185|AOD;CHV;FMA;NCI;SNOMEDCT;UWDA|||1|  
ER|equine rhinopneumonia|||1|  
ER|equivalent roentgen|||1|  
ER|erythrocyte receptor|C0142009|||C0142009|MSH|||1|  
ER|erythromycin|C0014806|||1|0.0022|  
ER|esophageal rupture|C0281839|||C0281839|CHV;COSTAR|||1|  
ER|estrogen;oestrogen|C0014939;C2936882|||1|0.0507|  
ER|estrogen receptor protein|C0059672|||1|0.0005|  
ER|estrogen receptor status;oestrogen receptor  
status|C1516974;C2919114|||1|0.0014|  
ER|ethoxyresorufin|C0059734|||1|0.0009|  
ER|evoked response|||1|0.0023|1|  
ER|expiratory reserve|C0802739;C0806093|||C0802739;C0806093|LNC;MTH|||1|  
ER|extended external rotation|||1|  
ER|extended resistance|||1|  
ER|external reduction|||1|  
ER|external resistance|||1|  
ER|external rotation|C0231462|||C0231462|CHV;SNOMEDCT;UWDA|1|0.0014|1|  
ER|extraction ratio|||1|0.0026|1|  
ER|eye research|||1|  
ER|rabbit erythrocytes|||1|0.001|  
ER|reversal potential|||1|0.0018|  
ES|(drug) ES||1|0.002|||1|  
ES|ARSC|C1420490;C2699259|||C2699259|NCI|||  
ES|ARSC1;STS wt Allele|C2699259|||C2699259|MTH;NCI|||  
ES|ASC|C2985440|||C2699259|NCI|||  
ES|E-SINUS;ENDOSINUSIAL;Endosinusial;Endosinusial Route of  
Administration;Endosinusial Route of Drug  
Administration|C1522661|||C1522661|MTH;NCI|||  
ES|EC 3.1.6.2|||C2699259|NCI|||  
ES|EFTs;EWING TUMOR;Ewing Tumor;Ewing's Tumor;Ewing's tumor;Ewing's  
tumour;Ewings Tumor;Tumor, Ewing's;ewing tumor;ewing's tumor;ewing's  
tumors;ewings tumor;ewings tumors;Ewing Family of Tumors;Ewing's Family of  
Tumors;Ewing's Family of Tumours;Ewing's family of tumors;Tumors of Ewing's  
Family;Tumors of the Ewing's Family;Ewing sarcoma family of  
tumors|C0553580|||C0553580|CHV;CSP;DXP;MSH;NCI;NDFRT;PDQ;SNOMEDCT|||

ES|EL SALVADOR;El Salvador;el  
salvador|C0013754|||C0013754|AOD;CHV;LCH;MSH;MTH;NCI;SNOMEDCT|||  
ES|ES;Es|||C0013754;C0037747;C0553580;C1522661;C1527243;C1552150;C2699259|HL7V3  
.0;MSH;NCI;OMIM|||  
ES|ESP|C0015373;C0037747;C1421982;C2981686|||C0037747|NCI|||  
ES|ETHICS;ethics|C0015000;C1527243;C1552232|||C1527243|MSH|||  
ES|EWING SARCOMA;Ewing Sarcoma;Ewing sarcoma;Ewing's Sarcoma;Ewing's  
sarcoma;Ewings sarcoma;SARCOMA, EWING;Sarcoma, Ewing;Sarcoma, Ewing's;Sarcoma,  
Ewings;ewing sarcoma;ewing's sarcoma;ewings sarcoma;ewings's sarcoma;sarcoma  
ewing;sarcoma ewing's;sarcoma ewings;sarcoma,  
Ewing's|C0553580;C0684337|||C0553580|CHV;COSTAR;CSP;DXP;MEDLINEPLUS;MSH;MTH;NCI;  
NDFRT;OMIM;PDQ;SNOMEDCT|1|0.0491|1  
ES|Ego Strength;ego strength|||1|0.0029|1  
ES|El Salvador (geographic location)|||C0013754|SNOMEDCT|||  
ES|Embryonic stem;embryonic stem|||1|0.5118|1  
ES|Endotoxin shock|||1|0.002|  
ES|Epilepsy Surgery|||1|0.0017|  
ES|Ewing Sarcoma/Peripheral Primitive Neuroectodermal Tumor;Ewing's  
Sarcoma/Peripheral Primitive Neuroectodermal Tumor|||C0553580|NCI|||  
ES|Ewing's sarcoma (morphologic abnormality)|||C0553580|SNOMEDCT|||  
ES|Excretory-secretory;excretory and secretory;excretory-  
secretory|||1|0.0779|1  
ES|Expectation Score|||1|  
ES|SLV|C0013754;C1826764|||C0013754|NCI|||  
ES|SP|C0231290;C1420701;C1705920|||C0037747|NCI|||  
ES|SPAIN;Spain;spain|C0037747|||C0037747|AOD;CHV;LCH;MSH;MTH;NCI;SNOMEDCT|||  
ES|SSDD|C0079588;C2699259;C2717836|||C2699259|NCI|||  
ES|SV|C0013754;C0560132;C1704677|||C0013754|NCI|||  
ES|Sarcoma, Ewing's [Disease/Finding]|||C0553580|NDFRT|||  
ES|Spain (geographic location)|||C0037747|SNOMEDCT|||  
ES|Steroid Sulfatase (Microsomal), Isozyme S wt Allele|||C2699259|NCI|||  
ES|Steryl-sulfatase|C0052456;C2699259|||C2699259|NCI|||  
ES|Supernumerary maxillary right central primary  
incisor|C1552150|||C1552150|MTH|||  
ES|ectoplasmic specialization|||1|0.0037|  
ES|effect size|C0814843|||1|0.031|  
ES|einsteinium|C0013741|||1|  
ES|ejection sound|C0277911|||1|  
ES|elastic stockings|C0013761|||1|  
ES|elastic suspensor|||1|  
ES|electrical stimulation|C0013786|||1|0.0701|1  
ES|electrical stimulus|||1|  
ES|electrically stimulated|||1|0.0023|  
ES|electrophilic stress|||1|  
ES|electroshock|C0013870|||1|  
ES|electrospray|||1|0.0169|1  
ES|electrostimulation|||1|0.0069|  
ES|electrotherapy system|||1|  
ES|elopement status|||1|  
ES|embolic signals|||1|0.0034|  
ES|embryonic stem cells|C0596508|||1|0.0043|  
ES|emergency service|C0013961|||1|  
ES|emission spectrometry|C0596509|||1|  
ES|emotional stress|C0086209|||1|0.0043|  
ES|end stage|C0205088|||1|  
ES|end systole|||1|  
ES|end-to-side|||1|

ES|endolymphatic sac|C0014168;C1281159|||||1|0.0342|  
ES|endometrial stromal|||||1|0.0029|  
ES|endometritis-salpingitis|||||1|  
ES|endoscopic sclerosis|||||1|  
ES|endoscopic sclerotherapy|||||1|0.0055|1  
ES|endoscopic sphincterotomy|C0085263|||||1|0.0554|1  
ES|endosonography|C0376443;C0376444|||||1|0.0052|  
ES|endostatin|C0534628;C1332771;C1705207|||||1|0.0049|  
ES|endotoxic shock|C0036981|||||1|0.0026|  
ES|engraftment syndrome|C0919746|||||1|0.0026|  
ES|enhanced sensitivity||1|0.028|||||  
ES|environmental stimulation|||||1|  
ES|enzyme estrone sulfatase|||||1|0.0057|  
ES|enzyme substrate;enzyme-substrate|C0178623|||||1|0.0046|1  
ES|enzyme-substrate complex|C0596529|||||1|0.0029|  
ES|epileptic seizures|C0014544|||||1|0.0072|  
ES|epileptic syndrome|||||1|  
ES|epithelial sarcoma|||||1|  
ES|epithelioid sarcoma|C0205944|||||1|0.0066|  
ES|erector spinae|C0224301;C1305743|||||1|0.0109|  
ES|erythromycin stearate|C0059566|||||1|0.0032|  
ES|esophageal scintigraphy|||||1|  
ES|esophagus|C0014876;C0545823;C1278919|||||1|  
ES|esophoria|C0152216|||||1|  
ES|esterase|C0014894|||||1|0.0034|1  
ES|estrogens|C0014939|||||1|0.0026|  
ES|estrone sulfate|C0059668|||||1|0.004|  
ES|ethics qualifier|C1527243|||C1527243|MTH|||  
ES|ex-smoker|C0337671|||||1|  
ES|exanthem subitum|C0015231|||||1|0.0049|  
ES|excretory-secretory products|||||1|0.0089|  
ES|exfoliation syndrome|C0206368|||||1|0.0026|1  
ES|experimental study|C0681814|||||1|  
ES|expert system|C0015324|||||1|0.0086|  
ES|expression site|||||1|0.004|  
ES|extent score|||||1|0.0043|  
ES|exterior surface|||||1|  
ES|external sensory|||||1|0.0026|  
ES|extra strength||1|0.938|||||1  
ES|extracapsular spread|||||1|  
ES|extracellular space|C0015352|||||1|0.002|  
ES|extrasystole|C0340464|||||1|  
ES|nitrobenzylthioinosine (NBMPR)-sensitive|||||1|0.002|  
ES|sheep erythrocytes|||||1|0.0029|  
ES|surface|C0205148|||||1|0.0029|  
ES|sweetened ethanol solution|||||1|0.0017|  
ESR|EPR spectroscopy;ESR - Electron spin resonance;ESR  
Spectroscopy;Spectroscopy, ESR;Electron Paramagnetic Resonance;Paramagnetic  
Resonance, Electron;Resonance, Electron Paramagnetic;Electron Spin  
Resonance;Electron spin resonance;Resonance, Electron Spin;electron spin  
resonance;Electron Spin Resonance Spectroscopy;Spectroscopy, Electron Spin  
Resonance;electron spin resonance spectroscopy;Electron paramagnetic resonance  
spectroscopy;electron paramagnetic resonance spectroscopy;Electron spin  
resonance measurement;Electron spin resonance measurement, NOS;Paramagnetic  
Resonance;Resonance,  
Paramagnetic|C0013845|||C0013845|CSP;LCH;MSH;MTH;NCI;SNOMEDCT|1|0.5234|1

ESR|ER;ERS|C0014688;C0403549;C1704489|||C1414461;C1704489;C1706235|AOT;NCI;OMIM|  
||  
ESR|ERA;Era|C0681698;C1414461;C1706235|||C1414461;C1706235|HUGO;NCI|||  
ESR|ESR;esrs|C0086250|||C0013845;C0086250;C1176468;C1414461;C1619634;C1704489;C1  
706235|AOT;CHV;CSP;MTH;NCI;OMIM|||  
ESR|ESR - Erythrocyte sedimentation rate;erythrocyte sedimentation rate  
(ESR);Erythrocyte Sedimentation Rate;Erythrocyte Sedimentation Rates;Erythrocyte  
sedimentation rate;Rate, Erythrocyte Sedimentation;Rates, Erythrocyte  
Sedimentation;Sedimentation Rate, Erythrocyte;Sedimentation Rates,  
Erythrocyte;erythrocyte rate sedimentation;erythrocyte sedimentation  
rate;erythrocyte sedimentation rates;erythrocytes rate  
sedimentation|C0086250;C1176468;C1619634|1|1|C0086250;C1114891;C1176468;C1619634  
|AOD;CHV;LNC;MSH;MTH;NCI;SNOMEDCT|1|0.4697|1  
ESR|ESR1|||C1414461;C1706235|HUGO;NCI;OMIM|||  
ESR|ESR1 Gene;ESR1 gene;ESTROGEN RECEPTOR, ALPHA;Estrogen Receptor 1  
Gene|C1414461|||C1414461|HUGO;MTH;NCI;OMIM|||  
ESR|ESR1 wt Allele;Estrogen Receptor 1 wt Allele|C1706235|||C1706235|MTH;NCI|||  
ESR|ESRA;NR3A1|C1414461;C1706235|||C1414461;C1706235|HUGO;NCI;OMIM|||  
ESR|ESTROGEN RECEPTOR;estrogen  
receptor|C0034804;C1414461;C1521863|||C0034804;C1414461;C1521863|CHV;CSP;LNC;NCI  
;OMIM;PDQ;SNOMEDCT|1|0.007|  
ESR|ESTROGEN RECEPTOR 1;estrogen receptor  
1|C1121711;C1414461;C1521863|||C1414461|HUGO;OMIM|||  
ESR|Electron spin resonance (procedure)|||C0013845|SNOMEDCT|||  
ESR|Electron spin resonance measurement (procedure)|||C0013845|SNOMEDCT|||  
ESR|Erythrocyte Sedimentation Rate Measurement;Erythrocyte sedimentation rate  
measurement|C1176468|||C1176468|MTH;NCI;SNOMEDCT|||  
ESR|Erythrocyte sedimentation rate (observable entity)|||C0086250|SNOMEDCT|||  
ESR|Erythrocyte sedimentation rate - finding;Finding of erythrocyte  
sedimentation rate;erythrocyte sedimentation rate  
result|C1619634|||C1619634|MTH;SNOMEDCT|||  
ESR|Erythrocyte sedimentation rate measurement  
(procedure)|||C1176468|SNOMEDCT|||  
ESR|Extended Rotated Sidebent;Extended Sidebent  
Rotated|C1704489|||C1704489|AOT;MTH|||  
ESR|Finding of erythrocyte sedimentation rate (finding)|||C1619634|SNOMEDCT|||  
ESR|electric skin resistance|||1  
ESR|electric skin response|||1  
ESR|sedimentation rate|C0200704;C1176468|||C1176468|NCI|||  
ESWL|Disintegration of stones by extracorporeal induced  
shockwaves|||C0015359|MTHICD9|||  
ESWL|ESWL;eswl;ESWL (Extracorporeal Shockwave Lithotripsy);ESWLs (Extracorporeal  
Shockwave Lithotripsy);Extracorporeal shockwave lithotripsy  
[ESWL];extracorporeal shock wave lithotripsy (ESWL);Electrohydraulic Shockwave  
Lithotripsies;Electrohydraulic Shockwave Lithotripsy;Lithotripsies,  
Electrohydraulic Shockwave;Lithotripsy, Electrohydraulic Shockwave;Shockwave  
Lithotripsies, Electrohydraulic;Shockwave Lithotripsy,  
Electrohydraulic;electrohydraulic shock wave lithotripsy;Extracorporeal  
Shockwave Lithotripsies;Extracorporeal Shockwave Lithotripsy;Extracorporeal  
shockwave lithotripsy;Extracorporeal shockwave lithotripsy, NOS;Lithotripsies,  
Extracorporeal Shockwave;Lithotripsy, Extracorporeal Shockwave;Shockwave  
Lithotripsies, Extracorporeal;Shockwave Lithotripsy,  
Extracorporeal;extracorporeal shock wave lithotripsy;extracorporeal shockwave  
lithotripsy|C0015359|1|1|C0015359|CHV;CSP;ICD9CM;MSH;MTHICD9;SNOMEDCT|1|1|1|1  
ESWL|Extracorporeal shockwave lithotripsy (procedure)|||C0015359|SNOMEDCT|||  
ESWL|Extracorporeal shockwave lithotripsy - action|||C0015359|SNOMEDCT|||

ESWL|Extracorporeal shockwave lithotripsy - action (qualifier value) ||||C0015359|SNOMEDCT|||  
ETOH|ALCOHOL;Alcohol;alcohol|C0001962;C0001975;C0202304|||C0001962|CHV;LNC;MEDLINEPLUS;MTHSPL;NCI;NDFRT;PDQ;VANDF|||  
ETOH|ALCOHOL,ETHYL;Alcohol, Ethyl;Ethyl Alcohol;Ethyl alcohol;alcohol ethyl;ethyl alcohol|C0001962;C0885054|1|1|C0001962;C0885054|AOD;CHV;CSP;MSH;NCI;NDFRT;PDQ;SNOMEDCT;VANDF|1|1|1  
ETOH|Absolute Ethanol;Absolute ethanol|C0001962;C1511761|||C0001962|NCI;PDQ|||  
ETOH|Alcohol, Grain;Grain Alcohol;Grain alcohol;grain alcohol;ETHANOL;Ethanol;ethanol;ethanols;ETOH;EtOH;EtOH - Alcohol;EtOH - Ethanol;Methylcarbinol|C0001962|||C0001962;C0202304|AOD;CHV;CSP;LNC;MSH;MTH;MTHSPL;NCI;NDFRT;PDQ;RXNORM;SNOMEDCT|||  
ETOH|Drinking alcohol|C0001948;C0001962;C0589068|||C0001962|SNOMEDCT|||  
ETOH|Ethanol [Chemical/Ingredient]|||C0001962|NDFRT|||  
ETOH|Ethyl alcohol (product)|||C0001962|SNOMEDCT|||  
ETOH|Ethyl alcohol (substance)|||C0001962|SNOMEDCT|||  
ET|CTP:ethanolamine-phosphate cytidyltransferase activity|||C1152393|GO|||  
ET|CYTIDYLYLTRANSFERASE, CTP-PHOSPHOETHANOLAMINE;ETHANOLAMINE-PHOSPHATE CYTIDYLYLTRANSFERASE|C0311988;C1418398|||C1418398|OMIM|||  
ET|E-TRACHE;Endotracheal Route of Administration;Endotracheal Route of Drug Administration;Intratracheal Route of Administration;Intratracheal route;IntratrachealRoute|C1522653|||C1522653|HL7V3.0;MTH;NCI;SNOMEDCT|||  
ET|ENDOTRACHEAL;endotracheal|C0599554;C1522653|1|0.4|C0599554;C1522653|CHV;CSP;HL7V2.5;MTH;NCI|1|0.0184|1  
ET|ET|||C0015024;C0015127;C1152393;C1418398;C1522653|GO;HUGO;MSH;NCI;OMIM|||  
ET|ETH;ETHIOPIA;Ethiopia;ethiopia;Federal Democratic Republic of Ethiopia|C0015024|||C0015024|AOD;CHV;LCH;MSH;MTH;NCI;SNOMEDCT|||  
ET|ETIOL|||C0015127|MSH|||  
ET|Ebbinghaus test|||1  
ET|End-tidal;end-tidal|||1|0.0063|1  
ET|Escherichia coli endotoxin|C0059291|||1|0.0041|  
ET|Essential thrombocytosis;essential thrombocytosis;essential thrombocythaemia;essential thrombocythemia|C0040028|||C0040028|CHV;COSTAR;CSP;ICD9CM;MSH;MTHICD9;NCI;PDQ;SNOMEDCT|1|0.1475|1  
ET|Essential tremor;essential tremor|C0270736|||C0270736|CHV;MEDLINEPLUS;MSH;MTH;NDFRT;OMIM;SNOMEDCT|1|0.0691|1  
ET|Estrogen therapy;estrogen therapy|C0279494|||1|0.0055|1  
ET|Ethiopia (geographic location)|||C0015024|SNOMEDCT|||  
ET|Etiology aspects|C0015127|||C0015127|MTH|||  
ET|Ewing tumor;Ewing tumors|C0553580|||1|0.0052|1  
ET|Exchange transfusion;exchange transfusion|C0015236|||C0015236|CHV;ICD9CM;MSH;SNOMEDCT|1|0.0091|1  
ET|Intratracheal|||C1522653|NCI;SNOMEDCT|||  
ET|Intratracheal route (qualifier value)|||C1522653|SNOMEDCT|||  
ET|Intratracheal use|||C1522653|SNOMEDCT|||  
ET|PCYT2;PCYT2 gene;PHOSPHATE CYTIDYLYLTRANSFERASE 2, ETHANOLAMINE;phosphate cytidyltransferase 2, ethanolamine|C1418398|||C1418398|HUGO;MTH;OMIM|||  
ET|aetiology;etiologies;etiology;cause;caused by;causes|C0015127;C1314792;C1524003|||C0015127|CHV;MSH|||1  
ET|causality|C0015127;C1314792|||C0015127|CHV;MSH|||  
ET|edema toxin|||1  
ET|edge thickness|||1  
ET|educational therapy|C0204583|||1  
ET|effective temperature|||1

ET|ejection time|C0812388;C2697908|||C0812388;C2697908|CHV;MTH;NCI|1|0.0237|1  
ET|elective termination||1|0.002|||  
ET|electron  
transfer|C0013846;C2244393|||C0013846;C2244393|AOD;CHV;CSP;GO;SNOMEDCT|1|0.0586|  
ET|electrophoretic type|||1|0.0061|  
ET|embryo transfer;embryo  
transfers|C0013938|||C0013938|CHV;CSP;MSH;NCI;SNOMEDCT|1|0.0022|1  
ET|endometrial thickness|||1|0.003|1  
ET|endothelin|C0079284|||C0079284|AOD;CHV;CSP;LNC;MSH;MTH;NDFRT|1|0.4616|1  
ET|endothelin-1|C0079281;C1414260;C2825886|||1|0.0333|  
ET|endotoxin;endotoxins|C0014264|||C0014264|CHV;CSP;LNC;NCI;SNOMEDCT|1|0.0025|1  
ET|endotracheal intubation|C0021932|||C0021932|CCS;CHV;MSH;SNOMEDCT|||  
ET|endotracheal tube|C0336630;C1546626|||C0336630|CHV;MTH;SNOMEDCT|1|0.0077|  
ET|endurance time|||1|  
ET|endurance training;endurance-trained|||1|0.0129|  
ET|energy transfer|C0014274|||C0014274|AOD;CHV;LCH;MSH;SNOMEDCT|||  
ET|enterostomal therapy|C1555976|1|0.578|||1|  
ET|enterotoxin|C0014372|||1|  
ET|environmental temperature|C2983601|||C2983601|NCI|||  
ET|epidermolytic toxin|||1|  
ET|epitestosterone|C0014594|||C0014594|CHV;LNC;MSH;NDFRT|1|0.0025|  
ET|epithelial tumor|C1368683|||1|  
ET|ergotamine  
tartrate|C0086248|||C0086248|MSH;MTHSPL;NCI;NDFRT;RXNORM;SNOMEDCT;USPMG;VANDF|||  
ET|erythrotoxic toxin|C0059545|||C0059545|MSH|||  
ET|esotropia|C0014877|||C0014877|CHV;COSTAR;DXP;ICD9CM;MSH;MTH;NDFRT;OMIM;SNOMED  
CT|1|0.0039|1  
ET|esotropic|||1|  
ET|ethanol|C0001962|||1|0.0105|1  
ET|ethanolamine phosphate cytidyltransferase activity;ethanolamine-phosphate  
cytidyltransferase activity|C1152393|||C1152393|GO;MTH|||  
ET|ethyl|||1|  
ET|etiocholanolone test|||1|  
ET|etoposide|C0015133|||C0015133|CHV;CSP;LCH;MSH;MTHSPL;NCI;NDFRT;PDQ;RXNORM;SNO  
MEDCT;USPMG;VANDF|1|0.0036|  
ET|eustachian  
tube|C0015183|||C0015183|CHV;CSP;FMA;LCH;MSH;MTH;NCI;SNOMEDCT;UWDA|1|0.0404|1  
ET|evapotranspiration|||1|0.0025|  
ET|evolutionary trace|||1|0.0028|  
ET|exercise test;exercise  
testing|C0015260|||C0015260|AOD;CHV;CSP;MSH;SNOMEDCT|1|0.0157|1  
ET|exercise  
tolerance|C0162521;C2709256|||C0162521;C2709256|CHV;CSP;LNC;MSH;MTH;SNOMEDCT|1|0  
.003|  
ET|exercise training;exercise-trained|||1|0.0206|  
ET|exercise treadmill|||1|  
ET|exfoliative toxin|||1|0.0072|  
ET|expiration time|||1|  
ET|exploratory thoracoscopy|||1|  
ET|extracellular tachyzoite|||1|  
ET|temperature|C0005903;C0039476|||1|0.0055|  
ET|tests|C0022885;C0392366|||1|0.0025|  
ET|treatment|C0039798;C0087111;C1522326;C1533734;C1705169;C3161471|||1|0.0028|  
FANA|fluorescent antinuclear antibody||1|1.000||1|1|1|  
FENA|Fractional excretion of sodium;fractional excretion of sodium;fractional  
sodium excretion|C0428601;C1318192;C1955481|1|1||1|0.9405|1  
FENA|fractional excretion of Na|||1|0.0595|

FEN|Fenoterol|C0015840|||||1|0.1739|  
FEN|d,l-fenfluramine|||||1|0.1449|  
FEN|fenfluramine|C0015827|||||1|0.6812|  
FEN|fluids, electrolytes, nutrition||1|1.000|||||1  
FEV1|FEV1|C0802965;C0849974|||C0802965;C0849974|LNC;NCI|||  
FEV1|FEV1%VC;Forced Expiratory Volume 1 Test;Pulmonary Function Test/Forced  
Expiratory Volume 1|C0849974|||C0849974|MTH;NCI|||  
FEV1|Forced Expiratory Volume in 1 Second;forced expiratory volume in 1  
second|C0429706;C0849974|||C0849974|NCI|1|0.6298|  
FEV1|PFT/FEV1|||||C0849974|NCI|||  
FEV1|Volume^at 1.0 s post forced expiration:Vol:Pt:Respiratory  
system:Qn|||||C0802965|LNC|||  
FEV1|Volume^at 1.0 s post forced expiration:Volume:Point in time:Respiratory  
system:Quantitative|C0802965|||C0802965|LNC;MTH|||  
FEV1|fev 1|C0429706;C0802965;C0849974|||C0849974|CHV|||  
FEV1|forced expiratory volume at one second|||||1|0.0186|  
FEV1|forced expiratory volume during first second of expiration|||||1|0.0012|  
FEV1|forced expiratory volume in 1 sec|||||1|0.2435|  
FEV1|forced expiratory volume in 1s|||||1|0.0373|  
FEV1|forced expiratory volume in one second||1|1.000|||||  
FEV1|lung function|C0035245|||||1|0.0385|  
FEV1|pulmonary function|C0231921;C1547996;C3160731|||||1|0.0161|  
FEV1|vital capacity|C0042834;C0430511|||||1|0.0099|  
FEV1|volume of air expelled in the first second of forced  
expiration|||||1|0.005|  
FFP|FFP;FFP - Fresh frozen plasma|C0016709|||C0016709|NCI;SNOMEDCT|||  
FFP|Federal Financial Participation|||||1|0.0349|  
FFP|Fresh Frozen Plasma;Fresh Frozen Plasmas;Fresh frozen plasma;Frozen Plasma,  
Fresh;Frozen Plasmas, Fresh;Plasma, Fresh Frozen;Plasmas, Fresh Frozen;fresh  
frozen  
plasma|C0016709;C1547245|1|1|C0016709;C1547245|CHV;HL7V2.5;LNC;MSH;MTH;NCI;SNO  
MEDCT|1|0.8542|1  
FFP|Fresh frozen plasma (product)|||C0016709|SNOMEDCT|||  
FFP|Fresh frozen plasma (substance)|||C0016709|SNOMEDCT|||  
FFP|Fresh frozen plasma, human|||C0016709|SNOMEDCT|||  
FFP|Fresh frozen plasma, human (product)|||C0016709|SNOMEDCT|||  
FFP|Fresh frozen plasma, human (substance)|||C0016709|SNOMEDCT|||  
FFP|fast Fourier projection|||||1|  
FFP|flexible fluoropolymer|||||1|  
FFP|free of progression|||||1|  
FFP|freedom from progression|||||1|0.1109|1  
FISH|Actinistia;Coelacanthimorpha;lobe-finned fishes  
<coelacanthimorph>|C1056439|||C1056439|MTH;NCBI|||  
FISH|Actinopterygii;fish <Actinopterygii>;fishes  
<Actinopterygii>|C0998822|||C0998822|MTH;NCBI|||  
FISH|Cartilaginous fish;cartilaginous fish;cartilaginous  
fishes;Chondrichthyes;Class Chondrichthyes;fish  
<Chondrichthyes>|C0327606|||C0327606|AOD;CSP;MTH;NCBI;SNOMEDCT|||  
FISH|Class Chondrichthyes (organism)|||C0327606|SNOMEDCT|||  
FISH|Class chondrichthyes - cartilaginous fish|||C0327606|SNOMEDCT|||  
FISH|Class chondrichthyes - cartilaginous fish  
(organism)|||C0327606|SNOMEDCT|||  
FISH|Dipneusti;Dipnoi;dipnoans;fish <Dipnoi>;fishes  
<Dipnoi>|C0998806|||C0998806|MTH;NCBI|||  
FISH|FISH;Fish;Fish (NOS);Fish,  
NOS;Fishes;fish;fishes|C0016163;C2349190;C2700184|||C0016163;C0162789;C0327606;C

0949652;C0998806;C0998822;C1056205;C1056439;C1696695;C1822711;C2349190;C2700184|  
AOD;CHV;CSP;HL7V3.0;HUGO;LCH;LNC;MSH;MTH;NCBI;NCI;SNOMEDCT|||  
FISH|FISH (fluorescent in situ hybridization);fluorescent in situ hybridization  
(FISH);FISH - fluorescence in situ hybridisation;FISH - fluorescence in situ  
hybridization;FISH Technic;FISH Technics;Technic, FISH;Technics, FISH;FISH  
Technique;FISH Techniques;Technique, FISH;Techniques, FISH;fish  
technique;fishing techniques;Fluorescence In Situ Hybridization;Fluorescence in  
Situ Hybridization;Fluorescence in situ Hybridization;Fluorescence in situ  
hybridisation;Fluorescence in situ hybridization;Hybridization in Situ,  
Fluorescence;In Situ Hybridization, Fluorescence;fluorescence hybridization  
situ;fluorescence in situ hybridisation;fluorescence in situ  
hybridization;Fluorescent in Situ Hybridization;Hybridization in Situ,  
Fluorescent;In Situ Hybridization, Fluorescent;fluorescent hybridization  
situ;fluorescent in situ hybridisation;fluorescent in situ  
hybridization|C0162789|1|0.898|C0162789|CHV;CSP;MSH;MTH;NCI;PDQ;SNOMEDCT|1|0.996  
8|1  
FISH|Fish (food)|C2349190|||C2349190|MTH|||  
FISH|Fish (organism)|||C0016163|SNOMEDCT|||  
FISH|Fish Flavor|C2700184|||C2700184|MTH;NCI|||  
FISH|Fluorescence in situ hybridization (procedure)|||C0162789|SNOMEDCT|||  
FISH|Hyperoartia;fish <Hyperoartia>;fishes  
<Hyperoartia>|C1056205|||C1056205|MTH;NCBI|||  
FISH|Hyperotreti;Hyperotretus;fish <Hyperotreti>;fishes  
<Hyperotreti>|C0949652|||C0949652|MSH;MTH;NCBI|||  
FISH|KIAA0418;SH3PXD2A;SH3PXD2A gene;five SH3  
domains|C1822711|||C1822711|HUGO;MTH|||  
FISH|Pisces;pisces|C0016163|||C0016163|AOD;CHV|||  
FISH|SH3 and PX domains 2A|||C1822711|HUGO|||  
FISH|fish - EntityCode|C1696695|||C1696695|MTH|||  
FISH|fish <Coelacanthomorpha>;fishes <Coelacanthomorpha>|||C1056439|NCBI|||  
FISH|fishes <chondrichthyan>|||C0327606|NCBI|||  
FISH|fluorescence in situ hybridization technique|||1|0.0013|  
FISH|lobe-finned fishes|||C1056439|NCBI|||  
FISH|situ hybridization analysis|||1|0.0019|  
FSH|FOLLICLE STIMULATING HORMONE;Follicle Stimulating Hormone;Follicle  
stimulating hormone;Follicle-Stimulating Hormone;Follicle-stimulating  
hormone;follicle hormone stimulating;follicle hormones stimulating;follicle  
stimulating hormone;follicle-stimulating hormone;follicle-stimulating  
hormones;FOLLITROPIN;Follitropin;follitropin;FSH (Follicle Stimulating  
Hormone);FSH - Follicle-stimulating hormone;follicle stimulating fsh hormone;FSH  
preparation;Follicle stimulating hormone preparation;Follicle-stimulating horm  
prod;Follicle-stimulating hormone product;Follicular stimulating  
hormone;follicular hormones stimulating;follicular stimulating  
hormone;Follitropin preparation;Pituitary follicle stimulating  
hormone;fshs|C0733758|1|0.53|C020222;C0733758|AOD;CHV;CSP;FMA;LNC;MSH;MTH;MTHSP  
L;NCI;NDFRT;RXNORM;SNOMEDCT;UWDA;VANDF|1|0.1429|1  
FSH|FSH|||C020222;C0733758|AOD;CHV;CSP;FMA;NCI;SNOMEDCT;UWDA|||  
FSH|FSH - Follicle stimulating hormone level;FSH measurement;Follicle  
Stimulating Hormone Measurement;Follicle stimulating hormone  
measurement;Follicle stimulating hormone  
level|C020222|||C020222|MTH;NCI;SNOMEDCT|||  
FSH|FSH level|C020222;C0428406|||C020222|SNOMEDCT|||  
FSH|Fairview Southdale Hospital||1|0.462|||  
FSH|Follicle Stimulating Hormone [Chemical/Ingredient]|||C0733758|NDFRT|||  
FSH|Follicle stimulating hormone measurement (procedure)|||C020222|SNOMEDCT|||  
FSH|Follicle stimulating hormone preparation (product)|||C0733758|SNOMEDCT|||  
FSH|Follicle stimulating hormone preparation (substance)|||C0733758|SNOMEDCT|||

FSH|Follicle-stimulating horm prod (product)||||C0733758|SNOMEDCT|||  
FSH|Follicle-stimulating horm prod (substance)||||C0733758|SNOMEDCT|||  
FSH|Follicle-stimulating hormone product (product)||||C0733758|SNOMEDCT|||  
FSH|Pituitary follicle stimulating hormone (substance)||||C0733758|SNOMEDCT|||  
FSH|facioscapulohumeral|||||||1  
FSH|facioscapulohumeral muscular dystrophy;fascioscapulohumeral muscular  
dystrophy|C0238288|1|0.008|||1|0.1964|  
FSH|focal and segmental hyalinosis|||||||1  
FSH|follicle hormone stimulateing||||C0733758|CHV|||  
FSH|follicle stimulating hormone (FSH) level test||||C0202022|CHV|||  
FSH|follicle-stimulating||||||1|0.5893|  
FSH|patients with facioscapulohumeral||||||1|0.0714|  
FUTS|fairview university transitional services||1|1.000|||||  
FVC|Capacities, Forced Vital;Capacity, Forced Vital;Capacity.vital.forced;Forced  
Vital Capacities;Forced Vital Capacity;Forced vital capacity;Vital Capacities,  
Forced;Vital Capacity, Forced;Vital capacity.forced;forced vital  
capacity|C0042834;C0430511;C0802685|1|0.994|C0042834;C0430511;C0802685|AOD;CHV;L  
NC;MSH;SNOMEDCT|||1  
FVC|Capacities, Vital;Capacity, Vital;Capacity.vital;Vital Capacities;Vital  
Capacity;Vital capacity;vital  
capacity|C0042834;C0430511|||C0042834|CHV;LNC;MSH;MTH;SNOMEDCT|||  
FVC|Capacity.vital.forced:Vol:Pt:Respiratory system:Qn||||C0802685|LNC|||  
FVC|Capacity.vital.forced:Volume:Point in time:Respiratory  
system:Quantitative|C0802685|||C0802685|LNC;MTH|||  
FVC|FORCED VITAL CAPAC||||C0042834|MSH|||  
FVC|FVC;fvc|C0042834;C0802685|||C0042834;C0802685|CHV;LNC;SNOMEDCT|||  
FVC|FVC - Forced vital capacity;Forced vital cap.;Lung vital capacity;lung vital  
capacity;vital lung capacity;VC - Vital  
capacity|C0042834|||C0042834|CHV;SNOMEDCT|||  
FVC|Forced vital capacity (observable entity)||||C0042834|SNOMEDCT|||  
FVC|Forearm vascular conductance||||||1|1|  
FVC|VC;vc|||C0042834|CHV;SNOMEDCT|||  
FVC|VITAL CAPAC|||C0042834|MSH|||  
FVC|Vital capacity (function)||||C0042834|SNOMEDCT|||  
FVC|Vital capacity (observable entity)||||C0042834|SNOMEDCT|||  
FVC|Vital capacity, function (observable entity)||||C0042834|SNOMEDCT|||  
FVC|false vocal cord|C0149596|||||||1  
FVC|femoral vein catheter||1|0.006|||||  
FVC|filled voiding flow rate|||||||1  
G-CSF|CSF-G;G CSF;G-CSF;csf g;g csf;g-csf;Colony-stimulating factor,  
granulocytic|C0079459|||C0079459;C0210630;C1705750|CHV;MSH;NCI;NDFRT;PDQ;SNOMEDC  
T|||  
G-CSF|CSF3;Colony Stimulating Factor  
3;Pluripoietin|C0079459;C1332793|||C0079459|NCI|||  
G-CSF|CSF3 wt Allele|C1705750|||C1705750|MTH;NCI|||  
G-CSF|Colony Stimulating Factor 3 (Granulocyte) wt Allele||||C1705750|NCI|||  
G-CSF|Colony-Stimulating Factor (Granulocyte);Colony-stimulating factor,  
granulocyte;Granulocyte Colony Stimulating Factor;Granulocyte Colony-Stimulating  
Factor;Granulocyte colony stimulating factor;granulocyte colony stimulating  
factor;granulocyte colony-stimulating  
factor|C0079459;C2825895|1|1|C0079459|CSP;LNC;MSH;MTH;NCI;NDFRT;PDQ;SNOMEDCT|1|0  
.9888|1  
G-CSF|Colony-stimulating factor, granulocytic  
(substance)||||C0079459|SNOMEDCT|||  
G-  
CSF|FILGRASTIM;Filgrastim;filgrastim|C0210630;C1332793|||C0210630|CHV;MSH;MTH;MT  
HSPL;NCI;NDFRT;PDQ;RXNORM;SNOMEDCT;VANDF|1|0.0112|

G-CSF|Filgrastim (product)|||C0210630|SNOMEDCT|||  
G-CSF|Filgrastim (substance)|||C0210630|SNOMEDCT|||  
G-CSF|Filgrastim [Chemical/Ingredient)|||C0210630|NDFRT|||  
G-CSF|G-CSF - Recombinant human granulocyte-colony stimulating  
factor;Recombinant Methionyl Human Granulocyte Colony Stimulating  
Factor;Recombinant-Methionyl Human Granulocyte Colony Stimulating  
Factor;Recombinant-Methionyl Human Granulocyte Colony-Stimulating  
Factor;filgrastrim;r-metHuG-CSF;r-methug-  
csf|C0210630|||C0210630|CHV;CSP;MSH;NCI;NDFRT;PDQ;SNOMEDCT|||  
G-CSF|G-CSF Recombinant, Human Methionyl|||C0210630|MSH;NDFRT|||  
G-  
CSF|GCSF;gcsf|C0079459;C1332793;C1705750;C2825895|||C0079459;C1705750|CHV;CSP;MS  
H;NCI|||  
G-CSF|GCSF (granulocyte colony stimulating factor)|||C0079459|CSP|||  
G-CSF|GRANULOCYTE COLONY A STIMULATING FACTOR|||C0079459|MSH|||  
G-CSF|Granulocyte Colony-Stimulating Factor  
[Chemical/Ingredient)|||C0079459|NDFRT|||  
G-CSF|MGC45931|C1332793;C1705750|||C1705750|NCI|||  
G1|1, Gap Phase;Gap 1 Phase;Gap Phase 1;Phase 1, Gap;First Gap Phase;First Gap  
Phases;Gap Phase, First;Gap Phases, First;Phase, First Gap;Phases, First  
Gap;first gap phase;G1 Phase;G1 Phases;G1 phase;Phase, G1;Phases, G1;G1 Phase  
Process;G1 period|C0079395|||C0079395|CSP;GO;MSH;MTH;NCI|1|0.0461|  
G1|BASIC SALIVARY PROLINE-RICH PROTEIN, BstNI TYPE, 3;PAROTID SALIVARY  
GLYCOPROTEIN;PRB3;PRB3 gene;PROLINE-RICH PROTEIN, BstNI SUBFAMILY, 3;proline-  
rich protein BstNI subfamily 3|C1418868|||C1418868|HUGO;MTH;OMIM|||  
G1|Differentiated;Differentiated,  
NOS;differentiate;differentiated;differentiates;differentiating|C0007589;C020561  
5|||C0205615|CHV;SNOMEDCT|||  
G1|First generation|||1|0.0461|  
G1|Fuhrman Grade 1;Fuhrman Nuclear Grade 1|C1880858|||C1880858|MTH;NCI|||  
G1|G A 01 PHASE|||C0079395|MSH|||  
G1|G1|||C0079395;C0205615;C0475269;C0687695;C1418868;C1880858|NCI;OMIM;SNOMEDCT  
|||  
G1|G1 grade;G1 stage;Tumor grade G1;Tumour grade  
G1|C0475269|||C0475269|MTH;SNOMEDCT|||  
G1|G1 grade (finding)|||C0475269|SNOMEDCT|||  
G1|G1 stage (tumor staging)|||C0475269|SNOMEDCT|||  
G1|G1: well differentiated|||C0475269|SNOMEDCT|||  
G1|Grade 1;grade 1|C0547053;C0687695|||C0687695|CHV;NCI;SNOMEDCT|1|0.1447|  
G1|Grade 1 (qualifier value)|||C0687695|SNOMEDCT|||  
G1|Grade I;grade i|C0687695;C1883546|||C0205615;C0687695|CHV;NCI;SNOMEDCT|||  
G1|Grade one rank|C0687695|||C0687695|MTH|||  
G1|Group 1|C0441861|||1|0.3816|  
G1|PRG|C0033308;C1418868;C1418888|||C1418868|HUGO|||  
G1|Well Differentiated;Well differentiated;Well-differentiated;well  
differentiated;well-  
differentiated|C0205615|||C0205615|CHV;MTH;NCI;SNOMEDCT|1|0.1053|1  
G1|Well differentiated (grade) (qualifier value)|||C0205615|SNOMEDCT|||  
G1|Well differentiated (grade) [Ambiguous]|||C0205615|SNOMEDCT|||  
G1|Well differentiated (qualifier value)|||C0205615|SNOMEDCT|||  
G1|activated|C1879547|||1|0.0592|  
G1|control group|C0009932|||1|0.1053|  
G1|first group|||1|0.0526|  
G1|first pregnancy|C0860096|1|0.998|||1|  
G1|galactose 1||1|0.002|||1|  
G1|gap1|||1|  
G1|grid 1|||1|

G1|patients|C0030705|1|0.0592|  
GAF|Activation Factor|1|0.0644|  
GAF|FGF9;FIBROBLAST GROWTH FACTOR  
9|C0386595;C1333540|C1333540|HUGO;NCI;OMIM||  
GAF|FGF9 Gene;FGF9 gene|C1333540|C1333540|HUGO;MTH;NCI||  
GAF|FGF9 wt Allele;HBMG-9|C1708018|C1708018|MTH;NCI||  
GAF|Fibroblast Growth Factor 9 (Glia-Activating Factor) Gene|C1333540|NCI||  
GAF|Fibroblast Growth Factor 9 (Glia-Activating Factor) wt  
Allele|C1708018|NCI||  
GAF|GAF|C1333540;C1708018|C1333540;C1708018|NCI;OMIM||  
GAF|GLIA-ACTIVATING FACTOR;glia-activating factor|C1333540|OMIM||  
GAF|Global Assessment of Functioning;Global Assessment of Functioning;global  
assessment of functioning|C0017644|1|1|0.7723|1  
GAF|Global Assessment of Functioning Scale|1|0.1634|  
GAF|fibroblast growth factor 9 (glia-activating factor)|C1333540|HUGO||  
GAF|geographic adjustment factors|1|  
GAF|giant axon formation|1|  
GC|2R,3S)-2-(3,4,5-trihydroxyphenyl)chroman-3,5,7-triol|C0061012|NCI||  
GC|CHROMATOGR GAS;GAS CHROMATOGR|C0008555|MSH||  
GC|Chromatographies, Gas;Chromatography, Gas;Gas Chromatographies;Gas  
Chromatography;chromatography gas;gas chromatography;Gas chromatography (GC);Gas  
chromatography measurement;Gas chromatography measurement, NOS;vapor phase  
chromatography|C0008555|1|0.01|C0008555|AOD;CHV;CSP;HL7V3.0;MSH;MTH;NCI;SNOMEDCT  
|1|0.258|1  
GC|DBP|C1367452;C1704663|HUGO;NCI;OMIM||  
GC|GC|C0008555;C0061012;C1367452;C1704663|HUGO;LNC;NCI;OMIM||  
GC|GC Gene;GC gene;VITAMIN D-BINDING ALPHA-  
GLOBULIN;hDBP|C1367452|C1367452|HUGO;MTH;NCI;OMIM||  
GC|GC wt Allele|C1704663|C1704663|MTH;NCI||  
GC|GROUP-SPECIFIC COMPONENT;Group-specific component;group-specific  
component;VITAMIN D-BINDING PROTEIN;vitamin D binding  
protein|C0042872;C1367452|C0042872;C1367452|NCI;OMIM|1|0.0618|1  
GC|Galocatechin;galocatechin;epigallocatechol;galocatechol|C0061012|C006101  
2|MSH;MTH;NCI||  
GC|Gas chromatography measurement (procedure)|C0008555|SNOMEDCT||  
GC|Gliomatosis cerebri;gliomatosis  
cerebri|C0334576|C0334576|MSH;MTH;NCI;SNOMEDCT|1|0.0072|1  
GC|Glucocorticoid  
hormones;glucocorticoid|C0017710|C0017710|CHV;CSP;NCI;PDQ;SNOMEDCT|1|0.1549|1  
GC|Golgi complex|C0018042|1|0.0087|1  
GC|Group-Specific Component (Vitamin D Binding Protein) Gene|C1367452|NCI||  
GC|Group-Specific Component (Vitamin D Binding Protein) wt  
Allele|C1704663|NCI||  
GC|Neisseria gonorrhoeae|C0027573|1|0.0108|  
GC|VDBG;VDBP|C1367452;C1704663|C1367452;C1704663|HUGO;NCI;OMIM||  
GC|anti-galactocerebroside|1|0.0028|  
GC|chromatographic gas|C0008555|CHV||  
GC|conductance|1|0.0028|  
GC|control group|C0009932|1|0.0023|  
GC|epigallocatechin;epigallocatechins|C0061012;C2348459|C0061012|CHV;MSH||  
GC|galactocerebroside|C0060955|C0060955|CHV;MSH;SNOMEDCT|1|0.0205|  
GC|ganglion cell|C0228071|C0228071|CHV;CSP;FMA;NCI;SNOMEDCT|1|  
GC|gas chromatograph|1|0.0141|  
GC|gas chromatographic|1|0.0675|  
GC|gastric  
cancer|C0024623;C0699791|C0024623;C0699791|AOD;CHV;CSP;MEDLINEPLUS;MSH;MTHICD9  
;NCI;OMIM;PDQ;SNOMEDCT|1|0.0449|1

GC|gastric  
 carcinoma|C0699791|||C0699791|CHV;COSTAR;CST;MTHMST;NCI;QMR;SNOMEDCT|1|0.0172|1  
 GC|gel chromatography|C0008559|||1  
 GC|gemcitabine and cisplatin|||1|0.0018|  
 GC|general circulation|||1  
 GC|general closure|||1  
 GC|general condition|||1  
 GC|genetic counselor|C0587719|1|0.032|||  
 GC|genomic control|||1|0.0023|  
 GC|geriatric care|C1552319;C1552333|||1  
 GC|geriatric chair|C0179860|||1  
 GC|germinal center;germinal  
 centre|C0282491|||C0282491|CHV;FMA;MSH;NCI;UWDA|1|0.1087|1  
 GC|giant cell|C0017526|||1  
 GC|gigacycle|||1  
 GC|gingival crevice|C0447436;C1280386|||1  
 GC|gingival curettage|C0038544|||1  
 GC|glassy carbon|||1|0.0138|  
 GC|glucocerebrosidase|C0017768;C1414998|||C0017768;C1414998|CSP;MSH;NDFRT;OMIM|  
 |  
 GC|glucocorticosteroids|||1|0.0041|  
 GC|glucose challenge||1|0.004|||  
 GC|glycocalicin|C0061621|||C0061621|MSH;MTH;OMIM|1|0.0059|  
 GC|glycocholate|C0086356|||C0086356|CHV;MSH|||1  
 GC|glycocholic acid|C0017905|||1|0.0015|  
 GC|glycoconjugate|C0017906|||C0017906|CHV;CSP;FMA|||  
 GC|glycoprotein C|C0061666;C1423085|||1|0.0354|  
 GC|goblet cell|C0506994|||C0506994|CHV;CSP;FMA;MSH;NCI;UWDA|||1  
 GC|goniocurettage|||1  
 GC|gonococcal;gonorrhoea|C0018081|||1|0.0054|1  
 GC|gonococci;gonococcus|C0027571;C0027573|1|0.954|||1|0.0036|1  
 GC|gonorrhoea culture|||1  
 GC|good condition|||1  
 GC|graham cracker|||1  
 GC|granular cast|||1  
 GC|granular component|C1167080|||C1167080|GO|||  
 GC|granular cyst|||1  
 GC|granule cell|C0596630|||C0596630|CSP|1|0.0036|1  
 GC|granulocyte cytotoxic|||1  
 GC|granulomatous colitis|C0156147|||1  
 GC|granulosa cell;granulosa  
 cells|C0018207|||C0018207|CHV;CSP;FMA;MSH;MTH;NCI|1|0.0539|1  
 GC|group-specific component (vitamin D binding protein)|||C1367452|HUGO|||  
 GC|growth cartilage|||1|0.0023|  
 GC|growth cone|C0596632|||C0596632|CSP;GO;MSH|||  
 GC|guanine cytosine;guanine-cytosine|||1|0.0077|1  
 GC|guanine plus cytosine|||1|0.0015|  
 GC|guanylate cyclase;guanylyl  
 cyclase|C0018358|||C0018358|CHV;CSP;MSH;MTH;NCI;NDFRT;SNOMEDCT|1|0.0618|  
 GC|guanylcyclase|||1  
 GC|gustatory cortex|C0682660|||1|0.0026|  
 GC|human glucocerebrosidase|||1|0.0044|  
 GC|pituitary tumor|C0032019|||1|0.0026|  
 GC|rat pituitary|C1882827|||1|0.0015|  
 GC|sodium glycocholate|||1|0.0021|  
 GCT|Carcinoid Neoplasm of Digestive System;Carcinoid Neoplasm of the Digestive  
 System;Digestive System Carcinoid Neoplasm;Carcinoid Neoplasm of GI

System;Carcinoid Neoplasm of the GI System;Carcinoid Neoplasm of Gastrointestinal System;Carcinoid Neoplasm of the Gastrointestinal System;Gastrointestinal System Carcinoid Neoplasm;Carcinoid Tumor of Digestive System;Carcinoid Tumor of the Digestive System;Digestive System Carcinoid Tumor;Carcinoid Tumor of GI System;Carcinoid Tumor of the GI System;Carcinoid Tumor of Gastrointestinal System;Carcinoid Tumor of the Gastrointestinal System;Gastrointestinal System Carcinoid Tumor;Carcinoid tumor of gastrointestinal tract;Carcinoid tumour of gastrointestinal tract;Common Neuroendocrine Tumor;Digestive Carcinoid Neoplasm;Digestive Carcinoid Tumor;GI Carcinoid Neoplasm;GI Carcinoid Tumor;GI carcinoid tumor;Gastrointestinal Carcinoid Neoplasm;Gastrointestinal Carcinoid Tumor;Gastrointestinal carcinoid tumor;carcinoid gastrointestinal tumors;carcinoid tumor, gastrointestinal;gastrointestinal carcinoid tumor|C0220620|||C0220620|CHV;MTH;NCI;PDQ;SNOMEDCT||| GCT|Carcinoid tumor of gastrointestinal tract (disorder)|||C0220620|SNOMEDCT||| GCT|GCT|C0205851;C0220620;C1419183|||C0205851;C0220620;C1419183|HUGO;NCI;OMIM;PDQ||| GCT|GERM CELL NEOPL;NEOPL GERM CELL|||C0205851|MSH||| GCT|GERM CELL TUMOR;Germ Cell Tumor;Germ Cell Tumors;Germ cell tumor;Germ cell tumor, NOS;Germ cell tumour;Tumor of Germ Cell;Tumor of the Germ Cell;Tumor, Germ Cell;Tumors, Germ Cell;cell germ tumours;cells germ tumors;germ cell tumor;germ cell tumors;germ cell tumour;germ-cell tumor;Germ Cell Neoplasm;Germ Cell Neoplasms;Germ cell neoplasm;Neoplasm of Germ Cell;Neoplasm of the Germ Cell;Neoplasms, Germ Cell;germ cell neoplasm;germ cell neoplasms|C0205851|||C0205851|CHV;CSP;MSH;MTH;NCI;OMIM;SNOMEDCT|1|0.2235|1 GCT|GLUTAMINYL CYCLASE;glutaminyl cyclase;GLUTAMINYL-PEPTIDE CYCLOTRANSFERASE;glutaminyl-peptide cyclotransferase|C0245636;C1419183|||C1419183|HUGO;OMIM||| GCT|General Clerical Test|C0451181|||1 GCT|Germ cell neoplasm (morphologic abnormality)|||C0205851|SNOMEDCT||| GCT|Germ cell tumor (disorder);Germ cell tumour (disorder)|||C0205851|SNOMEDCT||| GCT|QC|C0034378;C1419183|||C1419183|HUGO;OMIM||| GCT|QPCT;QPCT gene|C1419183|||C1419183|HUGO;MTH;OMIM||| GCT|[M]Germ cell neoplasm NOS;[M]Germ cell neoplasms|||C0205851|SNOMEDCT||| GCT|[M]Germ cell neoplasm NOS (morphologic abnormality);[M]Germ cell neoplasms (morphologic abnormality)|||C0205851|SNOMEDCT||| GCT|cell tumor|||1|0.4693| GCT|general care and treatment|||1 GCT|giant cell tumor of bone|C0206638|||1|0.0987| GCT|giant-cell thyroiditis|C0040149|||1 GCT|giant-cell transformation|C1856459|||1 GCT|giant-cell tumor|C0017525|||1 GCT|glucose challenge test|C0017741|1|0.998||1|0.0931| GCT|granular cell tumor|C0085167|||1 GCT|granular convoluted tubule|||1|0.1155| GCT|granulosa cell tumor|C0018206|||1 GERD|Acid Reflux;Acid reflux;acid reflux;reflux acid;Acid Reflux, Gastric;Gastric Acid Reflux;Reflux, Gastric Acid;CARDIOESOPHAGEAL RELAXATION, GASTROESOPHAGEAL REFLUX;GASTROESOPHAGEAL REFLUX;Gastroesophageal reflux;Gastroesophageal Reflux;Gastroesophageal reflux;Reflux, Gastroesophageal;gastroesophageal reflux;gastrooesophageal reflux;reflux gastroesophageal;GASTROESOPHAGEAL REFLUX DISEASE;Gastroesophageal REFLUX, PEDIATRIC;GE REFLUX;ge reflux;GERD;gerd;GERD -

Gastro-esophageal reflux disease;GERD1;GOR - Gastro-esophageal reflux;GOR - Gastro-oesophageal reflux;GORD - Gastro-esophageal reflux disease;GORD - Gastro-oesophageal reflux disease;Gastric Acid Reflux Disease;Gastro Esophageal Reflux;Gastro oesophageal Reflux;Gastro-Esophageal Reflux;Gastro-esophageal reflux;Gastro-oesophageal Reflux;Gastro-oesophageal reflux;Reflux, Gastro-Esophageal;Reflux, Gastro-oesophageal;gastro esophageal reflux;gastro oesophageal reflux;gastro-esophageal reflux;gastro-oesophageal reflux;Gastro-oesophageal reflux disease;Gastro-oesophageal reflux disease;disease gastro-oesophageal reflux;gastro-oesophageal reflux disease;diseases esophageal reflux;esophageal reflux disease;reflux disease esophageal;gastroesophageal reflux disease  
(GERD)|C0017168|1|1|C0017168|CHV;CSP;CST;DXP;LCH;LNC;MEDLINEPLUS;MSH;MTH;MTHICD9;MTHMST;NCI;NDFRT;OMIM;SNOMEDCT|1|1|1  
GERD|ESOPHAGEAL REFLUX;Esophageal Reflux;Esophageal reflux;Oesophageal reflux;esophageal reflux;oesophageal reflux;reflux  
esophageal|C0017168;C0559234||C0017168|CHV;COSTAR;DXP;ICD9CM;MSH;NCI;NDFRT;SNOMEDCT||  
GERD|GASTROESOPHAGEAL REFLUX DIS||||C0017168|MSH||  
GERD|GER|C0017168;C0230779||C0017168|OMIM||  
GERD|Gastroesophageal Reflux [Disease/Finding]||||C0017168|NDFRT||  
GERD|Gastroesophageal reflux (finding)||||C0017168|SNOMEDCT||  
GERD|Gastroesophageal reflux disease (disorder)||||C0017168|SNOMEDCT||  
GERD|Gastroesophageal reflux disease [Ambiguous]||||C0017168|SNOMEDCT||  
GERD|gastric reflux|C0017168;C0558176||C0017168|NCI||  
GERD|gerding||||C0017168|CHV||  
GERD|reflux|C0017168;C0232483;C1882919||C0017168|NCI||  
GFR|Creatinine clearance|C0812399||||1|0.0023|  
GFR|Filtration Rate, Glomerular;Filtration Rates, Glomerular;Glomerular Filtration Rate;Glomerular Filtration Rates;Glomerular filtration rate;Glomerular filtration rate, NOS;Rate, Glomerular Filtration;Rates, Glomerular Filtration;filtration glomerular rate;glomerular filtration rate;rate filtration  
glomerular|C0017654;C1561549|1|1|C0017654;C1561549|AOD;CHV;CSP;LCH;LNC;MSH;MTH;NCI;SNOMEDCT|1|0.9857|1  
GFR|GFR;gfr|C0017654;C1424601||C0017654;C1424601|AOD;CHV;HUGO;NCI;OMIM||  
GFR|GUANINE NUCLEOTIDE EXCHANGE FACTOR FOR RAP1;KIAA0277;MR-GEF;MRAS-REGULATED GUANINE NUCLEOTIDE EXCHANGE FACTOR;MRGEF;RAP GUANINE NUCLEOTIDE EXCHANGE FACTOR 5;RAPGEF5;RAPGEF5 gene|C1424601||C1424601|HUGO;MTH;OMIM||  
GFR|Glomerular filtration rate (function)||||C0017654|SNOMEDCT||  
GFR|Glomerular filtration rate (observable entity)||||C0017654|SNOMEDCT||  
GFR|Glomerular filtration rate, function (observable entity)||||C0017654|SNOMEDCT||  
GFR|Inulin clearance||||1|0.0025|  
GFR|M-Ras-regulated GEF||||C1424601|HUGO||  
GFR|Rap guanine nucleotide exchange factor (GEF) 5||||C1424601|HUGO||  
GFR|glomerular filtration|C0232809||||1|0.0069|  
GFR|growth factor receptor|C0206454||||1|  
GFR|grunting, flaring, retracting||||1|  
GFR|renal function|C0232804||||1|0.0025|  
GGT|(5-L-Glutamyl)-peptide:amino-acid 5-glutamyltransferase||C0017040|MSH;NDFRT||  
GGT|CD224;D22S672;D22S732;GAMMA-GLUTAMYLTRANSFERASE 1;gamma-glutamyltransferase 1;GGT;GGT1;GGT1  
gene|C1415053||C0017040;C0202035;C1415053|AOD;CHV;HUGO;MTH;NCI;OMIM||  
GGT|GGT - Gamma-glutamyl transferase;Gamma-Glutamyl Transpeptidase;Gamma-glutamyl transpeptidase;Transpeptidase, gamma-Glutamyl;gamma Glutamyl Transpeptidase;gamma glutamyl transpeptidase;gamma glutamyltranspeptidase;gamma-

Glutamyl Transpeptidase;gamma-glutamyl transpeptidase;gamma-glutamyltranspeptidase;Glutamyl Transpeptidase;Glutamyl transpeptidase;Transpeptidase, Glutamyl;glutamyl transpeptidase|C0017040|||C0017040|AOD;CHV;CSP;MSH;MTH;NCI;NDFRT;SNOMEDCT|1|0.5887|

GGT|GGT measurement;GGTP measurement;GTP measurement;Gamma Glutamyl Transpeptidase Measurement;Gamma glutamyl transpeptidase measurement;Gamma glutamyl transferase measurement;Gamma-glutamyl transferase level;gamma glutamyl transferase level test;ggt test;test

ggt|C0202035|||C0202035|CHV;MTH;NCI;SNOMEDCT|||

GGT|GGTP;ggtp|||C0017040;C0202035|CHV;MSH;MTH;NCI;NDFRT|||

GGT|Gamma Glutamyl Transferase;Gamma glutamyl transferase;Gamma-Glutamyl transferase;Gamma-glutamyl transferase;gamma Glutamyltransferase;gamma glutamyl transferase;gamma glutamyltransferase;gamma-Glutamyltransferase;gamma-glutamyl transferase;gamma-glutamyltransferase;gammaglutamyltransferase|C0017040;C0202035|1|0.998|C0017040;C0202035|AOD;CHV;LNC;MSH;MTH;NCI;NDFRT;SNOMEDCT|1|0.344|1

GGT|Gamma glutamyl transferase measurement (procedure)|||C0202035|SNOMEDCT|||

GGT|Gamma-GT;gamma GTP|C0017040;C1324645|||C0017040|NCI;SNOMEDCT|||

GGT|activity|C0026606;C0205177;C0439167;C0441655;C1561536|||1|0.0091|

GGT|galactosylhydroxylysyl glucosyltransferase|C0077685|||C0077685|MSH|||

GGT|gamma-Glutamyltransferase (substance)|||C0017040|SNOMEDCT|||

GGT|gamma-Glutamyltransferase [Chemical/Ingredient]|||C0017040|NDFRT|||

GGT|serum gamma-glutamyltransferase|||1|0.0582|

GI|ADENYLATE CYCLASE INHIBITORY PROTEIN;GNAI1 Gene;GNAI1 gene|C1415142|||C1415142|HUGO;MTH;NCI;OMIM|||

GI|G PROTEIN, ALPHA-INHIBITING 1|||C1415142|OMIM|||

GI|GASTROINTESTINAL PROBLEM;Gastrointestinal problem;gastrointestinal problem;gastrointestinal problem;Gastrointestinal tract problem;gi problems|C0017187|||C0017187|CHV;COSTAR;MTH;SNOMEDCT|||

GI|GI;Gi|||C0017187;C0017540;C0521362;C1136206;C1415142;C1551090;C1553044;C1996906|CHV;LNC;NCI;OMIM|||

GI|GI - in LOINC|C1996906|||C1996906|MTH|||

GI|GIB;GIBALTAR;Gibraltar|C0017540|||C0017540|LCH;MSH;MTH;NCI;SNOMEDCT|||

GI|GIGANTEA|||1|0.0034|

GI|GNAI1;Gil protein alpha subunit|C1415142;C1517337|||C1415142|HUGO;NCI;OMIM|||

GI|GUANINE NUCLEOTIDE-BINDING PROTEIN, ALPHA-INHIBITING ACTIVITY POLYPEPTIDE 1|||C1415142|OMIM|||

GI|Gastrointestinal;gastro intestinal;gastro-intestinal;gastrointestinal;gastrointestinal (GI)|C0521362;C1559265;C2707256|1|1|C0521362;C1559265|CHV;LNC;MTH;NCI;OMIM|1|0.8684|1

GI|Gastrointestinal tract problem (finding)|||C0017187|SNOMEDCT|||

GI|Gb|C0041700;C1551090|||C1551090|NCI|||

GI|General Inquiry|||1|

GI|Gibi;gibi|C1553044|||C1553044|HL7V3.0;MTH;NCI|||

GI|Gibraltar (geographic location)|||C0017540|SNOMEDCT|||

GI|Gilbert;Units Of Measure - Gilbert|C1551090|||C1551090|HL7V3.0;MTH;NCI|||

GI|Gingival Index;gingival index;gingival indices|C0017569|||C0017569|CHV;MSH|1|0.0014|1

GI|Gingival inflammation|||1|0.002|

GI|Glass ionomer;glass ionomer|C0061297|||C0061297|CHV;MSH|1|0.0039|

GI|Glucagon immunoreactivity|||1|0.0031|

GI|Glycemic Index;Glycemic Indices;glycaemic indices;glycemic index;glycemic indices;Glycemic Index Number;Glycemic Index Numbers|C1136206|||C1136206|CHV;MSH;MTH;NCI|1|0.0284|1

GI|Group I|C0441843|||1|0.0116|

GI|Guanine Nucleotide Binding Protein (G Protein), Alpha Inhibiting Activity  
Polypeptide 1 Gene||||C1415142|NCI|||  
GI|INHIBITORY G PROTEIN;inhibitory G  
protein|C0086706;C1415142|||C1415142|OMIM|1|0.0135|  
GI|adenylate cyclase|C0001492;C1382029||||1|0.002|  
GI|gastroenterology|C0017163;C1555759;C1555978||||1|0.0034|  
GI|gastrointestinal tract|C0017189;C1281182||||1|0.0149|  
GI|gelatin infusion||||||1  
GI|gender identity|C0017249||||||1  
GI|gigantocellular reticular nucleus|C0262242||||1|0.0017|  
GI|gill|C0017558;C1552935||||||1  
GI|glass ionomer cement|C0017597||||1|0.002|  
GI|global ischemia||||||1|0.0025|  
GI|glomerular index||||||1  
GI|glucose  
intolerance|C0271650|||C0271650|AOD;CHV;COSTAR;DXP;MSH;NCI;NDFRT;OMIM;SNOMEDCT|1  
|0.0034|1  
GI|glycoprotein I||||||1|0.0124|  
GI|good impression||||||1  
GI|granuloma inguinale|C0018190||||||1  
GI|growth inhibiting||||||1  
GI|growth inhibition||||1|0.0034|1  
GI|guanine nucleotide binding protein (G protein), alpha inhibiting activity  
polypeptide 1||||C1415142|HUGO|||  
GI|guided imagery|C0150627||||||1  
GI|inhibitory GTP-binding protein||||||1|0.0076|  
GI|inhibitory guanine nucleotide binding protein||||||1|0.0076|  
GI|inhibitory guanine nucleotide regulatory protein||||||1|0.0034|  
GJ|GD||||C0018232|NCI|||  
GJ|GJ||||C0018232|NCI|||  
GJ|GRD|C0018213;C0018232|||C0018232|NCI|||  
GJ|GRENADA;Grenada;grenada|C0018232|||C0018232|AOD;CHV;MSH;MTH;NCI;SNOMEDCT|||  
GJ|Grenada (geographic location)|||C0018232|SNOMEDCT|||  
GJ|gap junction|C0206117;C2984290||||1|0.5208|1  
GJ|gastric juice|C0017133||||||1  
GJ|gastrojejunal|C0545827|1|1.000|||1  
GJ|gastrojejunostomy|C0399839||||1|0.0938|1  
GJ|grapefruit juice|C0452456||||1|0.0469|1  
GJ|junctional conductance||||||1|0.3385|  
GT|>||||C0439093|SNOMEDCT|||  
GT|> (qualifier value)|C1285164|||C0439093|SNOMEDCT|||  
GT|Deficiency of GP 2 b 3 a complex||||C0040015|NDFRT|||  
GT|G protein transducin||||||1|0.0114|  
GT|GLANZMANN DISEASE;Glanzmann's disease;glanzmann's disease;GLANZMANN  
THROMBASTHENIA;Glanzmann Thrombasthenia;Glanzmann thrombasthenia;Glanzmann's  
thrombasthenia;Thrombasthenia, Glanzmann;glanzmann thrombasthenia;glanzmann's  
thrombasthenia;glanzmanns thrombasthenia;Glanzmann thromboasthenia;Glanzmann's  
syndrome;Glanzmann-Naegeli disorder;Hereditary haemorrhagic  
thrombasthenia;Hereditary hemorrhagic thrombasthenia;Hereditary  
thromboasthenia;Hereditary thromboasthenia, NOS;PLATELET GLYCOPROTEIN IIb-IIIa  
DEFICIENCY;Platelet glycoprotein 2 b-3a  
deficiency;THROMBASTHENIA;Thrombasthenia;Thrombasthenia,  
NOS;Thrombasthenias;thrombasthenia;Thrombasthenia, hemorrhagic;Thrombasthenia,  
hereditary;Thromboasthenia;Thromboasthenia,  
NOS;thromboasthenia;Thrombocytasthenia;thrombocytasthenia|C0040015|||C0040015|CH  
V;CSP;CST;DXP;MSH;MTH;MTHICD9;NCI;NDFRT;OMIM;SNOMEDCT|1|0.2023|1  
GT|GLYCOPROTEIN COMPLEX IIb-IIIa, DEFICIENCY OF||||C0040015|OMIM|||

GT|GP IIB-IIIa COMPLEX, DEFICIENCY OF|||C0040015|OMIM|||  
GT|GT|||C0018367;C0040015;C0439093|NCI;OMIM|||  
GT|GTM;GUATEMALA;Guatemala;guatemala|C0018367|||C0018367|AOD;CHV;CSP;LCH;MSH;MTH  
;NCI;SNOMEDCT|||  
GT|Gambling Task|||||1|0.025|  
GT|Gamow-Teller|||||1|  
GT|Generation time;generation time|||||1|0.0114|1  
GT|Glanzmann's thrombasthenia (disorder)|||C0040015|SNOMEDCT|||  
GT|Glanzsmann's disease|||C0040015|SNOMEDCT|||  
GT|Gliotoxin|C0017641|||||1|0.0205|  
GT|Glycoprotein IIB/IIIA defect|||C0040015|SNOMEDCT|||  
GT|Glycoprotein IIB/IIIA defect (disorder)|||C0040015|SNOMEDCT|||  
GT|Greater Than;Greater than;greater  
than|C0439093|||C0439093|CHV;HL7V2.5;HL7V3.0;MTH;NCI|||  
GT|Greater-than symbol >|||C0439093|SNOMEDCT|||  
GT|Greater-than symbol > (qualifier value)|||C0439093|SNOMEDCT|||  
GT|Guatemala (geographic location)|||C0018367|SNOMEDCT|||  
GT|L-glutamic acid50-L-tyrosine50|||||1|0.0523|  
GT|PLATELET FIBRINOGEN RECEPTOR, DEFICIENCY OF;Platelet Fibrinogen Receptor,  
Deficiency of;Platelet fibrinogen receptor, deficiency  
of|||C0040015|MSH;NDFRT;OMIM|||  
GT|THROMBASTHENIA OF GLANZMANN AND NAEGELI;Thrombasthenia of Glanzmann and  
Naegeli|||C0040015|MSH;NDFRT;OMIM|||  
GT|Thrombasthenia [Disease/Finding]|||C0040015|NDFRT|||  
GT|UDP-Glc|||||1|0.0205|  
GT|UDP-glucuronosyltransferase;UDP-  
glucuronyltransferase;glucuronosyltransferase;glucuronyl  
transferase;glucuronyltransferase|C0041560|||C0041560|MSH;NDFRT|1|0.0772|1  
GT|drop|C1321095;C1705648;C2347093;C2348338|||||1|  
GT|gait|C0016928|||||1|  
GT|gait training|C0085673|||C0085673|CHV;SNOMEDCT|||1|  
GT|galactosyl transferase;galactosyltransferase|C0016964;C0702242|||||1|0.0705|1  
GT|gamma-glutamyl transferase;gamma-  
glutamyltransferase|C0017040;C0202035|||||1|0.0591|1  
GT|gamma-glutamyl transpeptidase;glutamyl  
transpeptidase|C0017040|1|0.06|C0017040|AOD;CHV;CSP;MSH;NDFRT;SNOMEDCT|1|0.0159|  
1  
GT|gastrostomy|C0017196;C0546256|||C0017196;C0546256;C0595806;C1522614|AOD;CHV;I  
CD9CM;LCH;MSH;MTH;MTHMST;NCI;SNOMEDCT|||  
GT|gastrostomy tube|C0150595;C1549523;C2985542|1|0.892|||1|0.0136|1  
GT|gene therapy|C0017296|||||1|0.0295|1  
GT|genetic therapy|||||1|  
GT|genital tubercle|C0231058;C1281767|||||1|0.0205|  
GT|germ tube|C1819077|||||1|0.0182|  
GT|giant|C0017547|||||1|0.0432|  
GT|gingiva treatment|||||1|  
GT|gingival tissue|||||1|0.0114|  
GT|glucagon test|C0337437|||||1|  
GT|glucose tolerance|C0178665|1|0.004|C0178665|CHV;CSP;LNC|1|0.0727|1  
GT|glucose transport|C0178666|||C0178666|CHV;CSP;GO|1|0.0136|1  
GT|glucose transporter|C0017742|||||1|0.0636|  
GT|glucosyltransferase|C0119452|||C0119452|CHV;CSP;MTH|||  
GT|glutathione  
transferase|C0017837|||C0017837|CHV;CSP;LCH;MSH;NDFRT;SNOMEDCT|1|0.0409|  
GT|glycityrosine|||||1|  
GT|glycosyltransferase|C0085249|||C0085249;C1152069|CHV;CSP;MTH;NCI;SNOMEDCT|||  
GT|glycyltyrosine|C0061748|||C0061748|MSH|||

GT|grand total|||||||1  
GT|granulation  
tissue|C0018180|||C0018180|AOD;CHV;LCH;MSH;NCI;SNOMEDCT|1|0.0159|1  
GT|great toe|C0018534;C1281588|||C0018534;C1281588|CHV;FMA;LNC;SNOMEDCT;UWDA|||1  
GT|greater  
trochanter|C0223865;C1279114|||C0223865;C1279114|CHV;FMA;SNOMEDCT;UWDA|||1  
GT|green tea|C1384640;C1704263|||||1|0.0295|1  
GT|group tension|||||||1  
GT|group  
therapy|C0033971;C1527374|||C0033971;C1527374|AOD;CHV;CSP;LNC;MSH;MTH;NCI;SNOMEDCT|||1  
GT|gutta||1|0.032|||||  
GT|tissue conductance|||||1|0.0614|  
GTT|DROPS;Drop;Drops;drop;drop(s);drops|C0991568;C1321095;C1705648;C2347093;C2348338|||C0991568;C1321095;C2347093|CHV;HL7V3.0;NCI;NDFRT;SNOMEDCT|||1  
GTT|Drop (qualifier value)|||C1321095|SNOMEDCT|||  
GTT|Drop - unit of product usage;Drop Unit;Drop measurement;Metric Drop;X4;drop as a measurement|C1321095|||C1321095|CHV;MTH;NCI;SNOMEDCT|||  
GTT|Drop - unit of product usage (qualifier value)|||C1321095|SNOMEDCT|||  
GTT|Drop Dosage Form;Drop Dose Form;Drops [Dose Form];Drops dose form;Drops - Drug Form|C0991568|||C0991568|MTH;NCI;NDFRT;SNOMEDCT|||  
GTT|Drop Dosing Unit|||C1321095|NCI|||  
GTT|Drops dose form (qualifier value)|||C0991568|SNOMEDCT|||  
GTT|GESTATIONAL TROPHOBLASTIC NEOPL;TROPHOBLASTIC NEOPL  
GESTATIONAL|||C1135868|MSH|||  
GTT|GTT;Gtt;Gtts;gtt;gtts|C0017741;C1321095|||C0017741;C0991568;C1135868;C1321095;C2347093|CHV;NCI;PDQ;SNOMEDCT|||  
GTT|GTT - Glucose tolerance test;Glucose Tolerance Test;Glucose Tolerance Tests;Glucose tolerance test;Glucose tolerance test NOS;Glucose tolerance test, NOS;Glucose tolerance tests;glucose test tolerance;glucose testing tolerance;glucose tests tolerance;glucose tolerance test;glucose tolerance tests;Glucose challenge test;challenge glucose testing;glucose challenge test;Glucose tolerance test (procedure);Glucose tolerance test NOS (procedure);glucose procedure testing tolerance;OGTT - Oral glucose tolerance test|C0017741|1|0.98|C0017741|AOD;CHV;CSP;LCH;MSH;MTH;NCI;SNOMEDCT|1|0.814|1  
GTT|Gestational Trophoblastic Neoplasia;Gestational trophoblastic neoplasia;Neoplasia, Gestational Trophoblastic;Trophoblastic Neoplasia, Gestational;gestational trophoblastic neoplasia;Gestational Trophoblastic Neoplasm;Gestational Trophoblastic Neoplasms;Gestational trophoblastic neoplasm;Neoplasm, Gestational Trophoblastic;Neoplasms, Gestational Trophoblastic;Trophoblastic Neoplasm, Gestational;Trophoblastic Neoplasms, Gestational;Gestational Trophoblastic Tumor;Gestational trophoblastic tumor;Gestational trophoblastic tumour;gestational trophoblastic tumor;trophoblastic tumor, gestational;trophoblastic tumor  
GTT|C1135868|||C1135868|MSH;MTH;NCI;NDFRT;PDQ;SNOMEDCT|1|0.186|1  
GTT|Gestational Trophoblastic Neoplasms [Disease/Finding]||||C1135868|NDFRT|||  
GTT|Gestational trophoblastic neoplasm (disorder)|||C1135868|SNOMEDCT|||  
GTT|Gestational trophoblastic neoplasm (morphologic abnormality)|||C1135868|SNOMEDCT|||  
GTT|Gestational trophoblastic tumor (disorder)|||C1135868|SNOMEDCT|||  
GTT|Medical Drop|C2347093|||C2347093|MTH;NCI|||  
GTT|Pharmacist's Drop|||C1321095|NCI|||  
GTT|[drp]|C0675739;C1413979;C1421412;C2347093;C2985158|||C2347093|NCI|||  
GTT|drip||1|0.002|||||  
GTT|gamma-glutamyltransferase|C0017040;C0202035|1|0.006|||||  
GTT|gelatin-tellurite-taurocholate|||||||1  
GTT|gestational transient thyrotoxicosis|||||||1

GTT|gestational trophoblastic disease|C1135868;C2931618|||C1135868|NCI|||  
GTT|guttae||1|0.012|||  
GU|GENITOURINARY;Genitourinary;genitourinary|C0042066;C2709259|1|1|C0042066;C2709258;C2709259|CHV;LNC;NCI;OMIM|1|0.3095|1  
GU|GQ|C0014651|||C0018309|NCI|||  
GU|GU|||C0018309;C0042066;C2709258|NCI;OMIM|||  
GU|GUAM;Guam;guam|C0018309|||C0018309|AOD;CHV;MSH;MTH;NCI;SNOMEDCT|||  
GU|GUM|C0017562;C0812395|||C0018309|NCI|||  
GU|Genitourinary Route of Administration;Genitourinary Route of Drug Administration;GenitourinaryRoute|C2709258|||C2709258|HL7V3.0;MTH;NCI|||  
GU|Genitourinary System;Genitourinary Systems;Genitourinary system;Genitourinary system, NOS;Genitourinary systems;System, Genitourinary;Systems, Genitourinary;genitourinary system|C0042066;C1280973|||C0042066|CHV;LNC;MSH;MTH;NCI;SNOMEDCT|||  
GU|Genitourinary Tract;Genitourinary tract;Genitourinary tract, NOS;genitourinary tract|C0042027;C0042066;C1283794|||C0042066|CHV;LNC;NCI;SNOMEDCT|||  
GU|Glucose uptake;glucose uptake|C0599781|||C0599781|CHV;CSP;GO|1|0.0688|1  
GU|Guam (geographic location)|||C0018309|SNOMEDCT|||  
GU|Structure of genitourinary system;System, Urogenital;Systems, Urogenital;Urogenital System;Urogenital Systems;Urogenital system;Urogenital system, NOS;urogenital system;urogenital systems;Urogenital Tract;Urogenital structure;urogenital structure;urogenital|C0042066|||C0042066|AOD;CHV;CST;MSH;NCI;SNOMEDCT|||  
GU|Structure of genitourinary system (body structure)|||C0042066|SNOMEDCT|||  
GU|Systema urinaria;urinary system|C0042066;C1508753|||C0042066|CHV;UWDA|||  
GU|Urogenital structure (body structure)|||C0042066|SNOMEDCT|||  
GU|gastric|C0038351;C1704242|||1|0.0529|  
GU|gastric ulcer|C0038358|||C0038358|AOD;CCS;CHV;COSTAR;CSP;CST;DXP;ICD9CM;MEDLINEPLUS;MSH;MTH;MTHMST;NCI;NDFRT;OMIM;SNOMEDCT|1|0.4471|1  
GU|gastric upset|||1|  
GU|glucose utilization|||1|0.0529|  
GU|glycogenic unit|||1|  
GU|gonococcal urethritis|C0018078|||C0018078|CHV;COSTAR;MTH;MTHICD9;NCI;SNOMEDCT|1|0.0344|1  
GU|gravitational ulcer|C0042344|||C0042344|SNOMEDCT|||1  
GU|reproductive and urinary system|||C0042066|CHV|||  
GU|units|C0439148;C1519795|||1|0.0344|  
GU|urogenital system (urinary part)|||C0042066|CSP|||  
GVHD|Disease, Graft-Versus-Host;Diseases, Graft-Versus-Host;GRAFT VERSUS HOST DISEASE;Graft Versus Host Disease;Graft versus host disease;Graft versus host disease, NOS;Graft-Versus-Host Disease;Graft-Versus-Host Diseases;Graft-Versus-Host-Disease;Graft-versus-host disease;disease graft host versus;disease graft versus host;graft versus host disease;graft-versus-host disease;graft-versus-host diseases;host versus graft disease|C0018133;C2984293|1|1|C0018133|CHV;CSP;DXP;ICD9CM;MSH;NCI;NDFRT;PDQ;SNOMEDCT|1|0.9812|1  
GVHD|Disease, Graft-vs-Host;Diseases, Graft-vs-Host;Graft Vs. Host Disease;Graft vs Host Disease;Graft-vs-Host Disease;Graft-vs-Host Diseases;disease graft host vs;graft vs host disease;graft-vs-host disease;host vs graft disease;Disease, Homologous Wasting;Homologous Wasting Disease;homologous wasting disease;Disease, Runt;Runt Disease;runt disease;GVH;gvh;GVHD - Graft-versus-host disease;autoimmune foreign transplant disease;gvh disease|C0018133|||C0018133|CHV;CSP;DXP;MSH;MTH;NCI;NDFRT;SNOMEDCT|1|0.0089|  
GVHD|GRAFT VERSUS HOST DIS|||C0018133|MSH|||  
GVHD|GRAFT VS HOST DIS|||C0018133|MSH|||

GVHD|GVHD;gvhd||||C0018133;C0278845|CHV;CSP;DXP;NCI;PDQ|||  
GVHD|GVHD prophylaxis/therapy;prophylaxis/therapy, GVHD||||C0278845|NCI;PDQ|||  
GVHD|Graft Versus Host Disease Prophylaxis/Therapy;Graft versus host disease  
prophylaxis/therapy;graft versus host disease  
prophylaxis/therapy;prophylaxis/therapy, graft versus host  
disease||||C0278845|MTH;NCI;PDQ|||  
GVHD|Graft versus host disease (disorder);Graft-versus-host disease  
(disorder)||||C0018133|SNOMEDCT|||  
GVHD|Graft versus host disease [Ambiguous]||||C0018133|SNOMEDCT|||  
GVHD|Graft vs Host Disease [Disease/Finding]||||C0018133|NDFRT|||  
GVHD|Graft-versus-host NOS||||C0018133|ICD9CM|||  
GVHD|Graft-versus-host disease, unspecified||||C0018133|ICD9CM|||  
GVHD|HOMOL WASTING DIS||||C0018133|MSH|||  
GVHD|RUNT DIS||||C0018133|MSH|||  
GVHD|Runting syndrome|C0018133;C1279471||||C0018133|SNOMEDCT|||  
GVHD|acute graft-versus-host-disease|C0856825||||1|0.0056|  
GVHD|chronic graft-versus-host-disease|C0867389||||1|0.0043|  
GVHD|graft versu host disease||||C0018133|CHV|||  
GVHD|graft versus host disease (GVHD) prophylaxis therapy||||C0278845|CHV|||  
GVH|Disease, Graft-Versus-Host;Diseases, Graft-Versus-Host;GRAFT VERSUS HOST  
DISEASE;Graft Versus Host Disease;Graft versus host disease;Graft versus host  
disease, NOS;Graft-Versus-Host Disease;Graft-Versus-Host Diseases;Graft-Versus-  
Host-Disease;Graft-versus-host disease;disease graft host versus;disease graft  
versus host;graft versus host disease;graft-versus-host disease;graft-versus-  
host diseases;host versus graft  
disease|C0018133;C2984293|||C0018133;C2984293|CHV;CSP;DXP;ICD9CM;MSH;NCI;NDFRT;P  
DQ;SNOMEDCT|1|0.0167|  
GVH|Disease, Graft-vs-Host;Diseases, Graft-vs-Host;Graft Vs. Host Disease;Graft  
vs Host Disease;Graft-vs-Host Disease;Graft-vs-Host Diseases;disease graft host  
vs;graft vs host disease;graft-vs-host disease;host vs graft disease;Disease,  
Homologous Wasting;Homologous Wasting Disease;homologous wasting  
disease;Disease, Runt;Runt Disease;runt disease;GVH;gvh;GVHD - Graft-versus-host  
disease;autoimmune foreign transplant disease;gvh  
disease|C0018133|||C0018133|CHV;CSP;DXP;MSH;MTH;NCI;NDFRT;SNOMEDCT|||  
GVH|GRAFT VERSUS HOST DIS||||C0018133|MSH|||  
GVH|GRAFT VS HOST DIS||||C0018133|MSH|||  
GVH|GVHD;gvhd||||C0018133|CHV;CSP;DXP;NCI;PDQ|||  
GVH|Graft versus host disease (disorder);Graft-versus-host disease  
(disorder)||||C0018133|SNOMEDCT|||  
GVH|Graft versus host disease [Ambiguous]||||C0018133|SNOMEDCT|||  
GVH|Graft vs Host Disease [Disease/Finding]||||C0018133|NDFRT|||  
GVH|Graft-Versus-Host reaction|C0018134||||1|0.0358|  
GVH|Graft-versus-host NOS;graft versus host;graft-versus-  
host||1|1|C0018133|ICD9CM|1|0.747|1  
GVH|Graft-versus-host disease, unspecified||||C0018133|ICD9CM|||  
GVH|HOMOL WASTING DIS||||C0018133|MSH|||  
GVH|RUNT DIS||||C0018133|MSH|||  
GVH|Runting syndrome|C0018133;C1279471||||C0018133|SNOMEDCT|||  
GVH|generalized visceral hypersensitivity||||||1  
GVH|graft versu host disease||||C0018133|CHV|||  
GVH|graft-vs-host||||1|0.2005|  
GYN|GYN|C0018417;C0205480|||C0018417;C0205480|NCI|||  
GYN|GYNECOL||||C0018417|MSH|||  
GYN|Gynaecologic;Gynecologic;gynaecologic;gynecologic|C0205480|||C0205480|CHV;MT  
H;NCI;SNOMEDCT|||1  
GYN|Gynaecology;Gynecology;gynaecology;gynecology|C0018417;C0237419|1|1|C0018417  
;C0237419|CHV;CSP;HL7V3.0;LCH;LNC;MSH;MTH;NCI;SNOMEDCT|||1

GYN|Gynaecology (qualifier value);Gynecology (qualifier value)|||C0018417|SNOMEDCT|||  
GYN|Gynecologic (qualifier value)|||C0205480|SNOMEDCT|||  
GYN|gynecological|C0018417|||C0018417|CHV|||  
GYN|gynecologist|C0237419|||C0237419|CHV;MTH;NCI;SNOMEDCT|||  
GYN|gynecology (field)|||C0018417|AOD|||  
HCG|CG - Chorionic gonadotrophin;CG - Chorionic gonadotropin;CG preparation;Choriogonadotrophin;Choriogonadotropin;Chorionic gonadotrophin preparation;Chorionic gonadotropin preparation;Chorionic gonadotrophin product;Chorionic gonadotropin product;Pregnancy urine hormone|C0018062|||C0018062|LNC;MSH;NDFRT;SNOMEDCT|||  
HCG|CGA|||C1413366|HUGO;OMIM|||  
HCG|CGA gene;CHORIONIC GONADOTROPIN, ALPHA CHAIN;FOLLICLE-STIMULATING HORMONE, ALPHA CHAIN;FSHA;GPHA1;GPHa;LHA;LUTEINIZING HORMONE, ALPHA CHAIN;THYROID-STIMULATING HORMONE, ALPHA CHAIN;THYROTROPIN, ALPHA CHAIN;TSHA;chorionic gonadotropin, alpha polypeptide;follicle-stimulating hormone alpha subunit|C1413366|||C1413366|HUGO;MTH;OMIM|||  
HCG|CGB5;CGB5 gene;CHORIONIC GONADOTROPIN, BETA POLYPEPTIDE 5;chorionic gonadotropin, beta polypeptide 5|C1424291|||C1424291|HUGO;MTH;OMIM|||  
HCG|CGH|||C1415796;C1855900|HUGO;OMIM|||  
HCG|Choriogonadotropin (substance)|||C0018062|SNOMEDCT|||  
HCG|Choriogonadotropin Beta;Choriogonadotropin Beta Measurement|C1880076|||C1880076|MTH;NCI|||  
HCG|Chorionic Gonadotropin;Chorionic gonadotrophin;Chorionic gonadotropin, NOS;Chorionic gonadotropin;Chorionic gonadotropin, NOS;GONADOTROPIN, CHORIONIC;GONADOTROPIN, CHORIONIC;Gonadotropin, Chorionic;chorionic gonadotropin|C0018062;C1527152|||C0018062;C1527152|CHV;CSP;MSH;MTH;MTHSPL;NCI;ND FRT;RXNORM;SNOMEDCT;USPMG;VANDF|||  
HCG|Chorionic Gonadotropin [Chemical/Ingredient]|||C0018062|NDFRT|||  
HCG|Chorionic Gonadotropin, Human;Chorionic gonadotrophin human;Chorionic gonadotropin human;Gonadotropin, Human Chorionic;HUMAN CHORIONIC GONADOTROPIN;Human Chorionic Gonadotropin;Human chorionic gonadotrophin;Human chorionic gonadotrophin, NOS;Human chorionic gonadotropin;Human chorionic gonadotropin, NOS;human chorionic gonadotrophin;human chorionic gonadotropin;human chorionic gonadotropins;HCG (Human Chorionic Gonadotropin);HCG - Human chorionic gonadotrophin;HCG - Human chorionic gonadotropin;human chorionic gonadotropin (HCG)|C0018062;C1141639;C1527152|1|1|C0018062;C1141639;C1527152|AOD;CHV;MSH;MTH; NCI;RXNORM;SNOMEDCT|1|0.9648|1  
HCG|Chorionic gonadotropin preparation (product)|||C0018062|SNOMEDCT|||  
HCG|Chorionic gonadotropin preparation (substance)|||C0018062|SNOMEDCT|||  
HCG|Congenital, generalized hypertrichosis;HYPERTRICHOSIS, CONGENITAL GENERALIZED|C1855900|||C1855900|MTH;OMIM|||  
HCG|GLYCOPROTEIN HORMONES, ALPHA CHAIN;glycoprotein hormones, alpha polypeptide|C0017963;C1413366|||C1413366|HUGO;OMIM|||  
HCG|HCG;hCG|C0106132|||C0018062;C1141639;C1413366;C1415796;C1424291;C1527152;C18 55900;C1880076|AOD;CHV;HUGO;LNC;MSH;NCI;OMIM;PDQ;SNOMEDCT|||  
HCG|HCG - Human chorionic gonadotrophin product;HCG - Human chorionic gonadotropin product;HCG preparation;hCG preparation;Human chorionic gonadotrophin product;Human chorionic gonadotropin (product);Human chorionic gonadotropin product|C1141639|||C1141639|SNOMEDCT|||  
HCG|HTC2|C1415796;C1855900|||C1415796;C1855900|HUGO;OMIM|||  
HCG|HTC2 gene|C1415796|||C1415796|HUGO;LNC;MTH|||  
HCG|Human choriogonadotropin|||||1|0.0333|  
HCG|Human chorionic gonadotropin (substance)|||C1141639|SNOMEDCT|||  
HCG|Pregnancy Test;Pregnancy test|C0032976;C1880076|||C1880076|LNC;NCI|||

HCG|Recombinant Human Chorionic Gonadotropin;Recombinant human chorionic gonadotrophin;Recombinant human chorionic gonadotropin;recombinant human chorionic gonadotropin|C1527152|||C1527152|MTH;NCI;PDQ;SNOMEDCT|||

HCG|Recombinant chorionic gonadotrophin|||C1527152|SNOMEDCT|||

HCG|Recombinant chorionic gonadotrophin (product)|||C1527152|SNOMEDCT|||

HCG|Recombinant human chorionic gonadotrophin (product)|||C1527152|SNOMEDCT|||

HCG|Recombinant human chorionic gonadotrophin (substance)|||C1527152|SNOMEDCT|||

HCG|human chorionic gonadotropin hormone|||||1|0.0018|

HCG|hypertrichosis 2 (generalized, congenital)|||C1415796|HUGO|||

HCG|rhCG|C1425338;C1527152|||C1527152|NCI|||

HCT|Erythrocyte Volume, Packed;Erythrocyte Volumes, Packed;Packed Erythrocyte Volume;Packed Erythrocyte Volumes;Volume, Packed Erythrocyte;Volumes, Packed Erythrocyte;HCT;Hct;Haematocrit (procedure);Hematocrit procedure;Haematocrit - PCV;Haematocrit - PCV - NOS;Hematocrit - PCV;Hematocrit - PCV - NOS;Haematocrit determination;Hematocrit determination;Hct - Haematocrit;Hct - Hematocrit;Hematocrit Measurement;Packed Red Cell Volume;Packed Red-Cell Volume;Packed Red-Cell Volumes;Red-Cell Volume, Packed;Red-Cell Volumes, Packed;Volume, Packed Red-Cell;Volumes, Packed Red-Cell;Packed cell volume measurement;hematocrit level

test|C0018935|||C0018935|AOD;CHV;MSH;MTH;NCI;SNOMEDCT|||

HCT|Haematocrit;Hematocrit;Hematocrits;hematocrit|C0018935;C0518014|||C0018935;C0518014|AOD;CHV;CSP;LCH;LNC;MSH;MTH;NCI;SNOMEDCT|1|0.6566|1

HCT|Haematocrit (observable entity)|||C0018935|SNOMEDCT|||

HCT|Haematocrit - PCV - NOS (procedure);Hematocrit - PCV - NOS (procedure)|||C0018935|SNOMEDCT|||

HCT|Halstead Category Test|||||1|0.009|

HCT|Health Check Test|||||1|

HCT|Helical Computed Tomography;helical computed tomography;helical CT|C0860888|||C0860888|CHV;MSH;NCI|1|0.0352|

HCT|Hematocrit determination (procedure)|||C0018935|SNOMEDCT|||

HCT|Hematopoietic cell transplantation|||||1|0.1033|

HCT|Packed cell volume|C0018935;C1318015|||C0018935|SNOMEDCT|||

HCT|Packed cell volume (observable entity)|||C0018935|SNOMEDCT|||

HCT|Packed cell volume measurement (procedure)|||C0018935|SNOMEDCT|||

HCT|haematocrit centrifugation technique|||||1|0.0074|

HCT|haematocrit value|||||1|0.0049|

HCT|head computerized tomography|C0202691|||||1|

HCT|heart-circulation training|||||1|

HCT|hematopoietic cell transplant|||||1|0.0107|

HCT|hematopoietic stem cell transplant|||||1|

HCT|histamine challenge test|C2697609|||||1|

HCT|historic control trial|||||1|

HCT|homocytotrophic|||||1|

HCT|human calcitonin|C0770558|||C0770558|MTH;RXNORM;SNOMEDCT|1|0.091|1

HCT|human chorionic thyrotropin|C0063010|||||1|

HCT|hundred count|||||1|

HCT|hydrochlorothiazide|C0020261|1|1.000|||1|0.082|

HCT|hydrocortisone|C0020268|||||1|

HCTZ|2H-1,2,4-Benzothiadiazine-7-sulfonamide, 6-chloro-3,4-dihydro-, 1,1-dioxide;6-Chloro-3,4-dihydro-2H-1,2,4-benzothiadiazine-7-sulfonamide 1,1-dioxide|||C0020261|MSH;NCI;NDFRT|||

HCTZ|Dichlothiazide;Dihydrochlorothiazide;HCTZ;hctz;HYDROCHLOROTHIAZIDE;Hydrochlorothiazide;hydrochlorothiazide|C0020261|1|1|C0020261|CHV;LNC;MSH;MTHFDA;MTHSPL;NCI;NDFRT;RXNORM;SNOMEDCT;USPMG;VANDF|1|1|1|

HCTZ|Hydrochlorothiazide (product)|||C0020261|SNOMEDCT|||

HCTZ|Hydrochlorothiazide (substance)|||C0020261|SNOMEDCT|||

HCTZ|Hydrochlorothiazide [Chemical/Ingredient]||||C0020261|NDFRT|||  
HDL|Alpha-lipoprotein;Lipoprotein.alpha;alpha Lipoprotein;alpha  
Lipoproteins;alpha-Lipoproteins;alpha-lipoprotein;HDL;hdl;HDL - High density  
lipoprotein;High density lipoprotein (HDL);high density lipoproteins (HDL);HDL  
Lipoproteins;Lipoproteins, HDL;Heavy Lipoproteins;Lipoproteins, Heavy;High  
Density Lipoprotein;High Density Lipoproteins;High density lipoprotein;High-  
Density Lipoproteins;Lipoproteins, High-Density;high density lipoprotein;high  
density lipoproteins;high-density lipoprotein;High densitiy  
lipoprotein|C0023821|1|1|C0023821;C0428472;C1325339|AOD;CHV;CSP;FMA;GO;LNC;MEDLI  
NEPLUS;MSH;MTH;NCI;NDFRT;SNOMEDCT;UWDA|1|0.9797|1  
HDL|HDL Cholesterol|C0023822;C0428472|||C0428472|NCI|||  
HDL|High density lipoprotein (substance)|||C0023821|SNOMEDCT|||  
HDL|Lipoproteins, HDL [Chemical/Ingredient]||||C0023821|NDFRT|||  
HDL|Serum HDL Cholesterol;serum HDL cholesterol;Serum HDL Cholesterol  
Measurement;Serum HDL cholesterol  
measurement|C0428472|||C0428472|MTH;NCI;SNOMEDCT|||  
HDL|Serum HDL cholesterol level|C0428472;C1318181|||C0428472|SNOMEDCT|||  
HDL|Serum HDL cholesterol level (procedure)|||C0428472|SNOMEDCT|||  
HDL|Serum HDL cholesterol measurement (procedure)|||C0428472|SNOMEDCT|||  
HDL|high density lipoprotein fraction|||||1|0.001|  
HDL|high-density lipoprotein activity|C1325339|||C1325339|MTH|||  
HDL|high-density lipoprotein cholesterol|C0023822|||||1|0.0194|  
HELLP|HELLP|||C0162739|MSH|||  
HELLP|HELLP - Syndrome of haemolysis, elevated liver enzymes and low  
platelet;HELLP - Syndrome of hemolysis, elevated liver enzymes and low  
platelet;HELLP syndrome (hemolysis, elevated liver enzymes, low  
platelets)|||C0162739|OMIM;SNOMEDCT|||  
HELLP|HELLP Syndrome;HELLP syndrome;Syndrome, HELLP;hellp syndrome;syndrome  
hellp;Haemolysis-elevated liver enzymes-low platelet count syndrome;Hemolysis-  
elevated liver enzymes-low platelet count  
syndrome|C0162739|||C0162739|CHV;MSH;NCI;NDFRT;OMIM;SNOMEDCT|||  
HELLP|HELLP Syndrome [Disease/Finding]||||C0162739|NDFRT|||  
HELLP|HELLP syndrome (disorder)|||C0162739|SNOMEDCT|||  
HELLP|Hemolysis, Elevated Liver Enzymes, Lowered  
Platelets|||C0162739|MSH;NDFRT|||  
HELLP|Hemolysis-elevated liver enzymes-low platelet count syndrome  
(disorder)|||C0162739|SNOMEDCT|||  
HELLP|Syndrome of haemolysis, elevated liver enzymes and low platelet;Syndrome  
of hemolysis, elevated liver enzymes and low platelet||||C0162739|SNOMEDCT|||  
HELLP|Syndrome of haemolysis, elevated liver enzymes and low platelet  
(disorder)|||C0162739|SNOMEDCT|||  
HELLP|elevated liver enzymes and low platelet|||||1|0.6667|  
HELLP|hellps syndrome|||C0162739|CHV|||  
HELLP|hemolysis elevated liver enzymes and low platelets;hemolysis, elevated  
liver enzymes, low platelets||1|1|||1|0.3333|1  
HIDA|HIDA;LIDOFENIN;Lidofenin;lidofenin;hepato-iminodiacetic  
acid;hepatoiminodiacetic acid|C0064964|1|1|C0064964|CHV;MSH;NCI|||1|  
HIDA|N-(carboxymethyl)-N-(2-((2,6-dimethylphenyl)amino)-2-  
oxoethyl)glycine|||C0064964|MSH|||  
HIDA|hepatic 2,6-dimethyliminodiacetic acid||||||1|  
HIT|HIT;Hit;Hit by;hit;hit  
by;hitting|C0332159;C1708373|||C0332159;C1708373|CHV;MTHICD9;NCI;SNOMEDCT|||  
HIT|Headache Impact Test|||||1|0.0209|  
HIT|Hit - database search return|C1708373|||C1708373|MTH|||  
HIT|Holtzman Inkblot Technique|||||1|0.0342|1  
HIT|Hydrothermal Isometric Tension|||||1|0.0152|  
HIT|Struck by|C0332159|||C0332159|MTH;SNOMEDCT|||

HIT|Struck by (contextual qualifier)||||C0332159|SNOMEDCT|||  
HIT|Struck by (contextual qualifier) (qualifier value)||||C0332159|SNOMEDCT|||  
HIT|cell line|C0007600||||1|0.0114|  
HIT|haemagglutination inhibition test;hemagglutination inhibition  
test|C0018904|||C0018904|AOD;CHV;CSP;MSH|1|0.0228|1  
HIT|heparin-induced  
thrombocytopenia|C0272285|1|1.000|C0272285|CHV;MTHICD9;SNOMEDCT|1|0.8289|1  
HIT|high-intensity interval training||||1|0.0114|  
HIT|histamine inhalation test|||||||1  
HIT|histamine ion transfer|||||||1  
HIT|histidine triad||||||1|0.0361|  
HIT|home infusion therapy|C0242945||||1|0.019|1  
HIT|hypertrophic infiltrative tendinitis|||||||1  
HIT|hypertrophied inferior turbinate|||||||1  
HIV|AIDS Virus;AIDS Viruses;AIDS virus;Virus, AIDS;Viruses,  
AIDS|C0019682;C0019704|||C0019682|CHV;MSH;SNOMEDCT|||  
HIV|Acquired Immune Deficiency Syndrome Virus;Acquired Immunodeficiency Syndrome  
Virus;HTLV III;HTLV-III;htlv iii;htlv-iii;Human T Cell Leukemia Virus Type  
III;Human T-Cell Leukemia Virus Type III;Human T Cell Lymphotropic Virus Type  
III;Human T-Cell Lymphotropic Virus Type III;Human T Lymphotropic Virus Type  
III;Human T-Lymphotropic Virus Type III;LAV;LAV-HTLV-III;Lymphadenopathy  
Associated Virus;Lymphadenopathy-Associated Virus;Lymphadenopathy-Associated  
Viruses;Virus, Lymphadenopathy-Associated;Viruses, Lymphadenopathy-  
Associated;lymphadenopathy associated virus;Lymphadenopathy-associated virus  
(LAV);Virus-HIV|C0019682|||C0019682|CHV;CSP;MSH;NCI;SNOMEDCT|||  
HIV|HIV|C0019682;C0019693;C0019699|||C0019682;C0019693;C0086413|AOD;CHV;CSP;HL7V  
2.5;HL7V3.0;LNC;MEDLINEPLUS;MSH;MTH;NCI;SNOMEDCT|||  
HIV|HIV - Human immunodeficiency virus;HIV, HUMAN IMMUNODEFICIENCY VIRUS;HUMAN  
IMMUNODEFICIENCY VIRUS (HIV);VIRUS (HIV), HUMAN IMMUNODEFICIENCY;human  
immunodeficiency virus (HIV);Human Immunodeficiency Virus;Human Immunodeficiency  
Viruses;Human immunodeficiency virus;Human immunodeficiency virus,  
NOS;Immunodeficiency Virus, Human;Immunodeficiency Viruses, Human;Virus, Human  
Immunodeficiency;Viruses, Human Immunodeficiency;human Immunodeficiency  
virus;human immunodeficiency  
virus|C0019682;C0019693|1|1|C0019682;C0019693|AOD;CHV;CSP;MEDLINEPLUS;MSH;NCBI;N  
CI;SNOMEDCT|1|0.9823|1  
HIV|HIV - Human immunodeficiency virus infection;HUMAN IMMUNODEFICIENCY VIRUS  
[HIV] INFECTION;HIV DISEASE;HIV disease;HIV Infection;HIV Infections;HIV  
infection;HIV infections;Infection, HIV;Infections, HIV;HTLV III  
Infections;HTLV-III Infection;HTLV-III Infections;Infection, HTLV-  
III;Infections, HTLV-III;HTLV III LAV Infections;HTLV-III-LAV Infection;HTLV-  
III-LAV Infections;HTLV-III/LAV infection;HTLV-III/LAV infection, NOS;Infection,  
HTLV-III-LAV;Infections, HTLV-III-LAV;Human immunodeficiency virus [HIV]  
disease;Human immunodeficiency virus disease;Human immunodeficiency virus  
infection;Human immunodeficiency virus infection, NOS;human immunodeficiency  
virus infection;LYMPHOTROPIC VIRUS TYPE III INFECTIONS HUMAN T;T Lymphotropic  
Virus Type III Infections, Human;T-Lymphotropic Virus Type III Infections,  
Human|C0019693|||C0019693|AOD;CCS;CHV;COSTAR;CSP;CST;ICD9CM;LNC;MSH;MTH;MTHICD9;  
NCI;NDFRT;SNOMEDCT|1|0.0037|  
HIV|HIV INFECT|||C0019693|MSH|||  
HIV|HIV Infections [Disease/Finding]||||C0019693|NDFRT|||  
HIV|HIV Vaccine;HIV Vaccines;HIV vaccine;HIV vaccines;vaccine  
HIV|C0086413|||C0086413|CHV;CSP;MSH;MTH;NCI|||  
HIV|HIV seropositivity or positivity||||C0019693|AOD|||  
HIV|HIV/AIDS Vaccines||||C0086413|NCI|||  
HIV|HTLV III INFECT|||C0019693|MSH|||  
HIV|HTLV III LAV INFECT|||C0019693|MSH|||

HIV|HTLV WIII||||C0019682|MSH|||  
HIV|HTLV WIII INFECTIONS||||C0019693|MSH|||  
HIV|HTLV WIII LAV INFECTIONS||||C0019693|MSH|||  
HIV|HTLV-III/LAV infection (disorder)|||C0019693|SNOMEDCT|||  
HIV|HTLV-III/LAV infection -RETIRED-|||C0019693|SNOMEDCT|||  
HIV|HUMAN IMMUNODEFIC VIRUS;HUMAN IMMUNODEFIC VIRUSES;IMMUNODEFIC VIRUS  
HUMAN;IMMUNODEFIC VIRUSES HUMAN;VIRUS HUMAN IMMUNODEFIC;VIRUSES HUMAN  
IMMUNODEFIC||||C0019682|MSH|||  
HIV|HUMAN LYMPHOTROPIC VIRUS TYPE III A T||||C0019682|MSH|||  
HIV|Human Immunodeficiency Virus type 1;human immunodeficiency virus type  
I;human immunodeficiency virus-1|C0019704|||||1|0.0091|  
HIV|Human T-lymphotropic virus, type III (HTLV-III)|||C0019682|SNOMEDCT|||  
HIV|Human immuno virus dis||||C0019693|ICD9CM|||  
HIV|Human immunodeficiency syndrome|||||1|0.0008|  
HIV|Human immunodeficiency virus (organism)|||C0019682|SNOMEDCT|||  
HIV|Human immunodeficiency virus infection (disorder)|||C0019693|SNOMEDCT|||  
HIV|Lymphadenopathy-associated virus, type I (LAV-I)|||C0019682|SNOMEDCT|||  
HIV|T LYMPHOTROPIC VIRUS TYPE III INFECT HUMAN||||C0019693|MSH|||  
HIV|[X]Human immunodeficiency virus disease||||C0019693|SNOMEDCT|||  
HIV|[X]Human immunodeficiency virus disease (disorder)|||C0019693|SNOMEDCT|||  
HIV|[X]Unspecified human immunodeficiency virus [HIV]  
disease||||C0019693|SNOMEDCT|||  
HIV|[X]Unspecified human immunodeficiency virus [HIV] disease  
(disorder)|||C0019693|SNOMEDCT|||  
HIV|human immunodeficiency|||||1|0.0036|  
HIV|human immunodeficiency viral|||||1|0.0006|  
HJR|HEPATOJUGULAR REFLUX;Hepatojugular reflux;hepatojugular  
reflux;HJR;hjr|C0239949|1|1|C0239949|CHV;DXP;SNOMEDCT|||1  
HJR|Hepatojugular reflux (finding)|||C0239949|SNOMEDCT|||  
HLA|ANTIGENS IR;IR ANTIGENS||||C0019630|MSH|||  
HLA|Antigen, Class II;Antigens, Class II;Class II Antigen;Class II  
Antigens;Antigen, I-A;I A Antigen;I-A Antigen;I-A-Antigen;Antigen, IA;Antigens,  
Ia;IA Antigen;Ia Antigens;Ia antigen;Antigens, Ia-Like;Ia Like Antigens;Ia-Like  
Antigens;Antigens, Immune Response;Immune Response Antigens;Antigens, Immune-  
Response-Associated;Immune Response Associated Antigens;Immune-Response-  
Associated Antigens;Class II Histocompatibility Antigens;Histocompatibility  
Antigen, Class II;Histocompatibility Antigens Class II;Class II Major  
Histocompatibility Antigens;MHC Class II Molecule;MHC class II antigen;Major  
Histocompatibility Complex Class II;human lymphocyte  
antigen|C0019630|||C0019630|CSP;MSH;MTH;NCI;NDFRT|||  
HLA|Antigens, HL-A;Antigens, HLA;HL A Antigens;HL-A Antigens;HLA Antigens;HLA  
antigen;HLA antigen, NOS;HLA antigens;antigens hla;hla antigen;hla  
antigens;Antigens, Leukocyte;Leukocyte Antigens;antigens leukocytes;leukocyte  
antigen;HLA Ag;HLA factors;hl antigens;human histocompatibility complex derived  
antigens Antigen|C0019721|||C0019721|AOD;CHV;CSP;LNC;MSH;MTH;NDFRT;SNOMEDCT|||  
HLA|Antigens, Human Leukocyte;Human Leukocyte Antigen;Human Leukocyte  
Antigens;Human leucocyte antigen;Human leukocyte antigen;Leukocyte Antigens,  
Human;antigen human leukocyte;antigen human leukocyte;antigen human  
leukocytes;antigens human leukocyte;antigens human leukocytes;human leukocyte  
antigen;human leukocyte antigen;human leukocyte antigens;HLA - Human leukocyte  
antigen;HLA - Human leukocyte antigen;Human leucocyte antigen  
(HLA)|C0019629;C0019630;C0019721|1|1|C0019630;C0019721|AOD;CHV;CSP;LNC;MSH;NCI;N  
DFRT;SNOMEDCT|1|0.9655|1  
HLA|Class II MHC Protein;MHC Class II  
Protein|C0019630;C2327910|||C0019630|NCI|||  
HLA|HISTOCOMPATIBILITY ANTIGENS CLASS 02||||C0019630|MSH|||

HLA|HLA;hlas|C0019630;C0019721;C1315037;C2327792|||C0019630;C0019721;C1315037;C2327792|AOD;CHV;FMA;LNC;MSH;NCI|||

HLA|HLA A 00 ANTIGENS|||C0019721|MSH|||

HLA|HLA Antigens [Chemical/Ingredient]|||C0019721|NDFRT|||

HLA|HLA antigen (substance)|||C0019721|SNOMEDCT|||

HLA|HLA tissue typing antigens|C1315037|||C1315037|MTH|||

HLA|HLA tissue typing antigens and antibodies|||C1315037|LNC|||

HLA|Histocompatibility Antigens Class II [Chemical/Ingredient]|||C0019630|NDFRT|||

HLA|Human Major Histocompatibility|1|0.003|

HLA|Human leucocyte antigen (HLA) antigen;Human leukocyte antigen (HLA) antigen|||C0019721|SNOMEDCT|||

HLA|Human leukocyte antigen (HLA) antigen (substance)|||C0019721|SNOMEDCT|||

HLA|Human leukocyte antigen complex|C2327792|||C2327792|FMA;MTH|||

HLA|Symposium on major histocompatibility antigens|||1|0.0055|

HLA|blood lactate|||1|0.0035|

HLA|heart, lungs, abdomen|||1|

HLA|histocompatibility leukocyte antigen|||1|

HLA|histocompatibility locus antigen|||1|

HLA|histocompatibility system|||1|0.003|

HLA|homologous leukocyte antibody|||1|

HLA|horizontal long axial|||1|

HLA|human MHC|||1|0.0035|

HLA|human leukocyte|||1|0.0045|

HLA|human leukocyte antibody|||1|

HLA|human leukocyte antigen system|||1|

HLA|human major histocompatibility complex|||1|0.0115|

HLA|hypoplastic left atrium|C1970625|||1|

HN|HN|C0019905;C1537997;C1853668|||C0019905;C1537997;C1853668|HUGO;NCI;OMIM|||

HN|HND|C0018609;C0019905|||C0019905|NCI|||

HN|HO|C1832110|||C0019905|NCI|||

HN|HONDURAS;Honduras;honduras|C0019905|||C0019905|AOD;CHV;LCH;MSH;MTH;NCI;SNOMED CT|||

HN|HUMANIN;Humanin;humanin|C0966511;C1537997;C1853668|||C1537997;C1853668|HUGO;OMIM|1|0.0428|

HN|HUMANIN gene|C1853668|||C1853668|MTH|||

HN|Heymann nephritis|C1704378|||1|0.097|

HN|Honduras (geographic location)|||C0019905|SNOMEDCT|||

HN|Huckman number|||1|

HN|MT-RNR2;MTRNR2;MT-RNR2 gene;RIBOSOMAL RNA, MITOCHONDRIAL, 16S;mitochondrially encoded 16S RNA;rRNA, 16S, MITOCHONDRIAL|C1537997|||C1537997|HUGO;MTH;OMIM|||

HN|NATO code for nitrogen mustard|||1|

HN|glycoprotein|C0017968|||1|0.0164|

HN|haemagglutinin-neuraminidase;hemagglutinin neuraminidase;hemagglutinin-neuraminidase|C2985502|||1|0.6118|1

HN|head and neck|||C0460004;C1283900|CHV;LNC;NCI;OMIM;SNOMEDCT|1|0.0329|1

HN|head nurse|C0018676|||C0018676|AOD;CHV;MSH|||

HN|hemagglutinin-neuraminidase protein|||1|0.0164|

HN|hematemesis neonatorum|||1|

HN|hemorrhage of newborn|C0270183|||C0270183|SNOMEDCT|||1

HN|hereditary nephritis|C0027706;C1567741|||C0027706;C1567741|CHV;MSH;MTH;NCI;OMIM;SNOMEDCT|1|0.0247|1

HN|heterogeneous nuclear|||1|0.023|

HN|heteronuclear|||1|0.0444|

HN|high necrosis|||1|

HN|high nitrogen|||1|

HN|high nutrition||1|1.000|||||  
HN|hilar node|||||||1  
HN|histamine-containing neuron|||||||1  
HN|home nursing|C0019860|||C0019860|CHV;LCH;MSH|||1  
HN|hyaluronectin|||||1|0.0313|  
HN|hydronephrosis|C0020295|||||1|0.0164|  
HN|hyperplastic nodules|C0020510|||||1|0.028|  
HN|hypertensive nephrosclerosis|C0264657|||||||1  
HN|hypertrophic neuropathy|C0545036|||||||1  
HN|hypoglossal nucleus|C0228802|||||1|0.0148|  
HPV|HPV;hpvs;HPV - Human papillomavirus;hpv human papillomavirus;human papillomavirus (HPV);human papillomavirus HPV;HUMAN PAPILOMAVIRUS;Human Papilloma Virus;Human Papillomavirus;Human papilloma virus;Human papillomavirus;Human papillomavirus, NOS;PAPILLOMAVIRUS HUMAN;human papilloma virus;human papilloma viruses;human papillomas virus;human papillomavirus;human papillomaviruses;Human papillomavirus group;Human papillomavirus group, NOS;Verruca vulgaris virus;Wart virus;Warts virus;virus wart;virus warts;wart virus;warts virus;human papilloma  
viru|C0021344|1|1|C0021344;C0375016;C1512511|AOD;CHV;CSP;HL7V2.5;HL7V3.0;ICD9CM;LNC;MEDLINEPLUS;MTH;NCBI;NCI;NDFRT;SNOMEDCT;VANDF|1|0.9371|1  
HPV|HPV Vaccine;HPV Vaccines;HPV vaccine;Human Papilloma Virus Vaccine;Human Papilloma Virus Vaccines;Human Papillomavirus Vaccines;Human papillomavirus vaccine;Papillomavirus Vaccines, Human;Vaccines, Human Papillomavirus;human papillomavirus vaccine|C1512511|||C1512511|MSH;MTH;NCI;SNOMEDCT|||  
HPV|Haemophilus pertussis vaccine|||||||1  
HPV|Hart Park virus|C0300964|||||||1  
HPV|Human papillomavirus (organism)||||C0021344|SNOMEDCT|||  
HPV|Human papillomavirus group (organism)||||C0021344|SNOMEDCT|||  
HPV|Human papillomavirus vaccine (product)||||C1512511|SNOMEDCT|||  
HPV|Human papillomavirus vaccine (substance)||||C1512511|SNOMEDCT|||  
HPV|heart period variability|||||1|0.0034|  
HPV|hepatic portal vein|C0032718|||||1|0.0017|1  
HPV|hepatopancreatic parvovirus|C1067160|||||1|0.003|  
HPV|human papillomavirus infection|C0343641|||||1|0.0031|  
HPV|human parvovirus|C1955655|||||1|0.0048|1  
HPV|human parvovirus B19|C0085274|||||1|0.0017|  
HPV|hypoxic pulmonary vasoconstriction|||||1|0.0451|1  
HR|AU|C2348420|||C1415713|HUGO|||  
HR|CROATIA;Croatia;croatia;HRV|C0010343|||C0010343|AOD;CHV;MSH;MTH;NCI;SNOMEDCT|||  
HR|Cardiac rate;Cardiac rate, NOS;cardiac rate;cardiac rates;Heart Rate;Heart Rates;Heart rate;Heart rate, NOS;Rate, Heart;Rates, Heart;heart rate;heart rates;Hrtrate|C0018810|1|0.96|C0018810;C0488794|AOD;CHV;CSP;LNC;MSH;MTH;NCI;SNOMEDCT|1|0.8365|1  
HR|Cardiac rate (function)||||C0018810|SNOMEDCT|||  
HR|Cardiac rate (observable entity)||||C0018810|SNOMEDCT|||  
HR|Cardiac rate, function (observable entity)||||C0018810|SNOMEDCT|||  
HR|Croatia (geographic location)||||C0010343|SNOMEDCT|||  
HR|HAIRLESS, MOUSE, HOMOLOG OF;hairless homolog (mouse)||||C1415713|HUGO;OMIM|||  
HR|HOUR;HOURS;Hour;hour;hours|C0439227;C0564385|||C0439227|CHV;HL7V2.5;HL7V3.0;LNC;MTH;NCI;SNOMEDCT|1|0.001|1  
HR|HR;hr;hrs|||C0010343;C0018810;C0332167;C0439227;C1415713;C2265291|CHV;GO;HUGO;NCI;OMIM;SNOMEDCT|||  
HR|HR - Heart rate|||C0018810|SNOMEDCT|||  
HR|HR gene|C1415713|||C1415713|HUGO;MTH|||  
HR|HR-PCD;plant-type hypersensitive response|C2265291|||C2265291|GO;MTH|||  
HR|Halstead-Reitan|||||||1

HR|Harrington rod|C0181119|||||1  
HR|Heart rate (observable entity)||||C0018810|SNOMEDCT|||  
HR|Heart rate (observable)||||C0018810|SNOMEDCT|||  
HR|Heart rate (observable) (observable entity)||||C0018810|SNOMEDCT|||  
HR|High risk of;high risk;high risk of;high risks;high-  
risk|C0332167|||C0332167|CHV;MTH;SNOMEDCT|1|0.0149|1  
HR|High risk of (contextual qualifier)||||C0332167|SNOMEDCT|||  
HR|High risk of (contextual qualifier) (qualifier value)||||C0332167|SNOMEDCT|||  
HR|High risk of -RETIRED-|||C0332167|SNOMEDCT|||  
HR|Human recombinant|||||1|0.0037|  
HR|Hybrid resistance;hybrid resistance|C1369008|||C1369008|NCI|1|0.0013|  
HR|O-(beta-hydroxyethyl)-rutosides|||||1|0.0021|  
HR|h|C0033727;C0369286;C0441932;C0564385;C1553030|||C0439227|NCI|||  
HR|h - hour|C0439227|||C0439227|SNOMEDCT|||  
HR|hairless|||||1|0.0037|  
HR|hairless gene|||||1|0.0008|  
HR|hallux rigidus|C0264134|||||1  
HR|halorhodopsin|C0062108|||C0062108|MSH;NDFRT|||  
HR|hazard ratio|C2985465|||C2985465|NCI|1|0.0624|1  
HR|health related|||||1  
HR|heart|C0018787;C1281570|||||1|0.0009|  
HR|hematopoietic reconstitution|||||1  
HR|hematopoietic resistance|||||1  
HR|hemerythrin|C0018976;C1149094|||||1|0.001|  
HR|hemorrhagic retinopathy|||||1  
HR|heparin-releasable|||||1|0.001|  
HR|hepatic resection|||||1|0.0008|  
HR|hepatorenal|C0545792|||||1  
HR|heptad repeat|||||1|0.0022|  
HR|heterosexual relations|||||1  
HR|high resolution;high-resolution|C1719039|||||1|0.0056|1  
HR|high responders|||||1|0.0037|  
HR|high responders to novelty|||||1|0.0005|  
HR|higher rate|||||1  
HR|histamine release|C0019595|||C0019595|CHV;CSP;MSH|1|0.0087|1  
HR|homing receptor|||||1|0.0013|  
HR|homologous  
recombination|C0599773;C2984295|||C0599773;C2984295|CSP;MSH;NCI|1|0.018|  
HR|homologous region|||||1|0.0009|  
HR|hormonal response|||||1  
HR|hormone  
receptor|C0019929;C0083740;C1367453|||C0019929;C0083740;C1367453|CHV;CSP;MTH;NCI  
;OMIM|1|0.0006|  
HR|hospital record|C0019980|||||1  
HR|hospital report|C0806434|||||1  
HR|host range|C2936413|||C2936413|MSH|1|0.0016|  
HR|hour (qualifier value)||||C0439227|SNOMEDCT|||  
HR|human  
resources|C0024752;C0220852;C0700103|1|0.034|C0024752;C0220852;C0700103|AOD;CHV;  
MSH;MTH|||1  
HR|hydroxyethylrutoside|C0020354|||C0020354|CHV;MSH;NDFRT|||  
HR|hyperimmune reaction|||||1  
HR|hypersensitive reaction|||||1|0.0036|  
HR|hypersensitive response|||||1|0.0208|  
HR|hypertensive retinopathy|C0152132|||||1  
HR|hypophosphatemic rickets|C0733682;C1704375|||||1  
HR|hypoxic reaction|||||1

HR|hypoxic responder|||||1  
HR|light-driven chloride pump halorhodopsin|||||1|0.0003|  
HR|plant hypersensitive response|||C2265291|GO||  
HR|resistant|C0332325;C2827757|||||1|0.0008|  
HR|rutosides|C0035976|||||1|0.0008|  
HSM|DKFZp761A179;HSM;LRR4B;LRR4B gene;leucine rich repeat containing  
4B|C1537594||C1537594|HUGO;MTH||  
HSM|heparin surface-modified intraocular lens|||||1  
HSM|heparin-surface-modified|||||1|1|  
HSM|hepatosplenomegaly|C0019214|1|1.000|C0019214|CHV;CST;DXP;OMIM;SNOMEDCT|||1  
HSM|holosystolic murmur|C0232258||C0232258|CHV;SNOMEDCT|||1  
HS|Bedtime;bedtime;bedtimes;Bedtime (qualifier value);Hour Of Sleep;hour of  
sleep;hora somni|C0521112||C0521112|CHV;MTH;NCI;SNOMEDCT|1|0.0054|1  
HS|DNase I hypersensitive|||||1|0.0067|  
HS|DNase I hypersensitive sites|||||1|0.0113|  
HS|FTDCR1B|C1367673;C1705574||C1367673;C1705574|HUGO;NCI|||  
HS|HS;Hs;Once a day, at  
bedtime|C1275563||C0521112;C1275563;C1367673;C1552153;C1705574;C2674218|HL7V3.0  
;HUGO;MTH;NCI;OMIM;SNOMEDCT|||  
HS|HS-142-1|C0122426|||||1|0.0046|  
HS|HS1|||C2674218|OMIM|||  
HS|HSNIK|C1335946;C1367673;C1705574||C1367673;C1705574|HUGO;NCI;OMIM|||  
HS|Harmonic Scalpel|||||1|0.0063|  
HS|Hartmann solution|C0073385|||||1  
HS|Hartmann-Shack|||||1  
HS|Haynes-Stellite|||||1  
HS|Headspace|||||1|0.0109|  
HS|Heparan sulfate;heparan sulfate  
sulphate|C0019143||C0019143|CHV;CSP;FMA;LNC;MSH;NCI;NDFRT;SNOMEDCT;UWDA|1|0.303  
5|  
HS|Hopelessness Scale|C0451217|||||1|0.0059|1  
HS|Humic substances|C1449672|||||1|0.0222|  
HS|Hypochondriasis;hypochondriasis|C0020604|||||1|0.0105|1  
HS|MAP3K14;MITOGEN-ACTIVATED PROTEIN KINASE KINASE KINASE 14;mitogen-activated  
protein kinase kinase kinase 14|C1335946;C1367673||C1367673|HUGO;NCI;OMIM|||  
HS|MAP3K14 Gene;MAP3K14 gene;Mitogen-Activated Protein Kinase Kinase Kinase 14  
Gene;NF-KAPPA-B-INDUCING KINASE|C1367673||C1367673|HUGO;MTH;NCI;OMIM|||  
HS|MAP3K14 wt Allele;Mitogen-Activated Protein Kinase Kinase Kinase 14 wt  
Allele|C1705574||C1705574|MTH;NCI|||  
HS|NIK|||C1367673;C1705574|HUGO;NCI;OMIM|||  
HS|Once a day, at bedtime (qualifier value)|||C1275563|SNOMEDCT|||  
HS|SERINE/THREONINE PROTEIN KINASE NIK|C1335946||C1367673|OMIM|||  
HS|SPH;SPHEROCYTOSIS, HEREDITARY, 1;SPHEROCYTOSIS, TYPE 1;SPHEROCYTOSIS, TYPE 1  
(disorder)|C2674218||C2674218|MTH;OMIM|||  
HS|SPH1|C1412402;C2674218;C2827376||C2674218|OMIM|||  
HS|Supernumerary maxillary left primary canine|C1552153||C1552153|MTH|||  
HS|at bedtime||1|0.964|||||1  
HS|haemorrhagic septicaemia;hemorrhagic  
septicemia|C0086973||C0086973|MSH;MTH;NDFRT|1|0.0071|1  
HS|half strength||1|0.024|||||1  
HS|half-scan|||||1  
HS|hamstring;hamstrings|C0584895||C0584895|NCI|||1  
HS|hamstring sets|||||1  
HS|hand surgery|C0187067|||||1  
HS|head sign|||||1  
HS|head sling|||||1  
HS|health status|C0018759||C0018759|AOD;CHV;HL7V3.0;MSH;NCI;SNOMEDCT|1|0.0042|

HS|healthy smokers|||||1|0.0029|  
HS|healthy subject;healthy subjects|C1708335|||||1|0.0468|1  
HS|heart size|C0744689|||||1|  
HS|heart sound;heart sounds|C0018820|1|0.002|C0018820|CHV;CSP;MSH;SNOMEDCT|||1  
HS|heat shock|C0282498|||C0282498|NCI|1|0.0707|  
HS|heat stable;heat-stable|||||1|0.0079|1  
HS|heat stress|C0282507|||C0282507|CHV|1|0.0305|  
HS|heat stroke|C0018843|||||1|0.0038|  
HS|heavy smoker|||||1|  
HS|heel spur|C0158322|||||1|  
HS|heelstick|C0419343|||||1|  
HS|heme synthetase|C0015880;C1414580|||||1|  
HS|hemophagocytic syndrome|C0024291|||C0024291|CHV;MSH;NCI;SNOMEDCT|1|0.0084|  
HS|hemorrhagic  
shock|C0036982|||C0036982|AOD;CHV;CSP;LCH;MSH;NCI;NDFRT;SNOMEDCT|1|0.0497|1  
HS|hemorrhagic stroke|C0553692|||C0553692|CHV;DXP;OMIM;SNOMEDCT|1|0.0054|  
HS|hemosorption|C0019063|||C0019063|MSH|1|0.0109|  
HS|henoch schonlein|C0034152|1|0.006|1|1|  
HS|heparin sulfate|||||1|  
HS|hepatic steatosis|C0015695;C2711227|||C0015695;C2711227|AOD;CHV;OMIM|||  
HS|hepatosplenic|||||1|0.0046|  
HS|hereditary  
spherocytosis|C0037889|||C0037889|CHV;COSTAR;CSP;DXP;ICD9CM;MSH;MTH;SNOMEDCT|1|0  
.0886|1  
HS|herpes  
simplex|C0019348|||C0019348|CHV;COSTAR;CST;DXP;ICD9CM;ICPC;LCH;MEDLINEPLUS;MSH;M  
TH;NDFRT;SNOMEDCT|1|0.0059|1  
HS|heterogeneous stock|||||1|0.0096|  
HS|hidradenitis  
suppurativa|C0162836|||C0162836|CHV;COSTAR;MEDLINEPLUS;MSH;MTH;MTHICD9;NDFRT;SNO  
MEDCT|1|0.0155|1  
HS|high school|C0599395;C0870649|||C0599395;C0870649|CHV;CSP;NCI|||1  
HS|high-salt|||||1|0.0234|  
HS|high-salt diet|||||1|0.0025|  
HS|high-spin|||||1|0.005|  
HS|hindlimb suspension|C0376593|||C0376593|MSH|1|0.0255|  
HS|hippocampal sclerosis|C1504404|||C1504404|MTHICD9|1|0.0535|1  
HS|histiocytic sarcoma|C0334663|||C0334663|CHV;MSH;MTH;NCI;NDFRT;SNOMEDCT|||  
HS|homologous serum|||||1|  
HS|horizontal system|||||1|0.0021|  
HS|horizontally selective|||||1|  
HS|horizontally selective visual cell|||||1|  
HS|hormone-sensitive|C1512498|||C1512498|NCI|||  
HS|horse serum|C1518416|||||1|0.0192|1  
HS|hospital ship|C0337966|||||1|  
HS|hospital stay|||||1|  
HS|human serum|||||1|0.0301|1  
HS|hunger sensation|||||1|0.0054|  
HS|hydrazine sulphate|C0063067|||C0063067|CHV;SNOMEDCT|||  
HS|hypereosinophilic syndrome|C0206141;C0263662;C0346421;C1540912|||||1|  
HS|hyperplastic synovium|||||1|  
HS|hypersensitivity|C0020517;C0520946|||||1|  
HS|hypersensitivity syndrome|C0543698|||C0543698|CHV|||  
HS|hypertonic saline;hypertonic saline  
solution|C0036085|||C0036085|CHV;NCI;PDQ;SNOMEDCT|1|0.0569|1  
HS|hypertrophic scar|C0162810|||C0162810|CHV;MSH;MTHICD9;NCI;SNOMEDCT|1|0.0029|1  
HS|hypochondriasis scale|||||1|

HS|hyposensitization|C0178702|||C0178702;C0354899|CHV;CSP;SNOMEDCT|1|0.0046|  
HS|hypothalamic stimulation|C0441693|||C0441693|SNOMEDCT|1|0.0029|  
HS|hypothalamic syndrome|C0751230|||1|1|  
HS|hysterosalpingography|C0020709|||1|1|  
HS|hysteroscopy|C0020710|||C0020710|CHV;ICD9CM;MSH;SNOMEDCT|||  
HS|qHS;qh;qhs|C0558292;C1275563|||C1275563|CHV;SNOMEDCT|||  
HS|score|C0449820|||1|1|0.0063|  
HS|serine/threonine protein-kinase|C0072402|||C1367673|HUGO|||  
HSV|Genus Simplexvirus;HHV;HS - Herpes simplex;HSV;hsv;HSV - Herpes simplex virus;Herpes Simplex Virus;Herpes Simplex Viruses;Herpes simplex virus;herpes simplex virus;herpes simplex viruses;herpes virus simplex;simplex virus herpes;Herpes labialis Virus;Herpes labialis Viruses;labialis herpes virus;Herpesvirus hominis;Simplexvirus;Simplexvirus,  
NOS;Simplexviruses;simplexvirus;human herpesvirus;human herpesvirus 1 group|C0206558|1|1|C0206558|AOD;CHV;CSP;LNC;MEDLINEPLUS;MSH;MTH;NCBI;NCI;SNOMEDCT|1|0.9355|1|  
HSV|Genus Simplexvirus (organism)|||C0206558|SNOMEDCT|||  
HSV|Genus: Human herpesvirus 1 group|||C0206558|SNOMEDCT|||  
HSV|Herpes simplex group virus;Herpes simplex virus group;Herpes simplex virus group, NOS|C0206557|||C0206558|SNOMEDCT|||  
HSV|Herpes simplex group virus (organism)|||C0206558|SNOMEDCT|||  
HSV|Herpesvirus;Herpesvirus,  
NOS;herpesvirus|C0019369;C0206558|||C0206558|CHV;CSP;LNC;SNOMEDCT|||  
HSV|Human Herpesvirus 1|C0206558;C0206679|||C0206558|NCI|||  
HSV|Human herpesvirus 1 group virus|||C0206558|SNOMEDCT|||  
HSV|Human herpesvirus 1 group virus (organism)|||C0206558|SNOMEDCT|||  
HSV|Simplexvirus (living organism) (organism)|||C0206558|SNOMEDCT|||  
HSV|Simplexvirus (living organism) [Ambiguous]|||C0206558|SNOMEDCT|||  
HSV|Simplexvirus (organism)|||C0206558|SNOMEDCT|||  
HSV|herpe simplex virus|||C0206558|CHV|||  
HSV|herpes simplex|C0019348|||1|1|0.0149|  
HSV|herpes simplex viral|||1|1|0.005|  
HSV|herpes simplex virus type 1;herpes simplex virus type I|C0206679|||1|1|0.0164|  
HSV|highly selective vagotomy|C0042273|||C0042273|ICD9CM;MSH;SNOMEDCT|1|0.0194|1|  
HSV|hop stunt viroid|C1000459|||C1000459|NCBI|1|0.0026|  
HSV|human saphenous vein|||1|1|0.0062|  
HSV|hyperviscosity syndrome|C0221030|||1|1|  
I&D|incision and drainage|C0152277|1|1.000|||1|1|  
I&D|irrigation and debridement|||1|1|  
I&D|irrigation and drainage|||1|1|  
IA|(class) IA||1|0.006|||1|  
IA|(grade) IA||1|0.022|||1|  
IA|(stage) IA|C0456595;C0457150|1|0.550|||1|  
IA|(status) IA||1|0.010|||1|  
IA|(type) IA||1|0.010|||1|  
IA|A-current|||1|1|0.017|  
IA|A-type K+ current|||1|1|0.0116|  
IA|Arterial injection|||C0021487|SNOMEDCT|||  
IA|Arterial injection (procedure)|||C0021487|SNOMEDCT|||  
IA|Class II major histocompatibility complex|||1|1|0.0116|  
IA|I region-associated|||1|1|0.0178|  
IA|I-ARTER;I-arter;Injection, Intra-Arterial;Injection, Intraarterial;Injection, intraarterial;Injections, Intra Arterial;Injections, Intra-Arterial;Injections, Intra-arterial;Injections, Intraarterial;Intra Arterial Injections;Intra-Arterial Injection;Intra-Arterial Injections;Intra-arterial injection;Intraarterial Injection;Intraarterial Injections;intra arterial

injection;intra-arterial injection;intra-arterial injections;intraarterial  
injections|C0021487|||C0021487|AOD;CHV;HL7V3.0;LCH;MSH;MTH;NCI;SNOMEDCT|||  
IA|IA;Ia;Ia  
<mammal>|C1947960|||C0021487;C0022037;C0444974;C1947960|MTH;NCBI;NCI;SNOMEDCT|||  
IA|INJECT INTRA ARTERIAL;INJECT INTRAARTERIAL;INTRA ARTERIAL  
INJECT;INTRAARTERIAL INJECT|||C0021487|MSH|||  
IA|Ia (qualifier value)|||C0444974|SNOMEDCT|||  
IA|Idiopathic anaphylaxis;idiopathic  
anaphylaxis|C0413235|||C0413235|CHV;SNOMEDCT|1|0.0124|1  
IA|Induced abortion|C0392535;C1704300|||1|0.0062|  
IA|Insulin antibodies|C0021644|||1|0.0155|  
IA|Intestinal atresia;intestinal  
atresia|C0021828|||C0021828|CHV;MSH;MTH;NCI;NDFRT|1|0.0077|  
IA|Intra-arterial injection (procedure)|||C0021487|SNOMEDCT|||  
IA|Intra-articular;intra-  
articular;intraarticular|C0442108|||C0205528;C0442108;C1522204|CHV;MTH;NCI;SNOME  
DCT|1|0.082|1  
IA|Intraarterial;intra-arterial;intraarterial|C0694634|1|0.352|||1|0.2629|1  
IA|Iowa|C0022037;C1555231|1|0.038|C0022037|AOD;CHV;LCH;MSH;MTH;NCI;SNOMEDCT|||  
IA|Iowa (geographic location)|||C0022037|SNOMEDCT|||  
IA|Serotype Ia;Ia serotype|C0444974|||C0444974|MTH;SNOMEDCT|||  
IA|Serotype Ia (qualifier value)|||C0444974|SNOMEDCT|||  
IA|activity|C0026606;C0205177;C0439167;C0441655;C1561536|||1|0.017|  
IA|arterial|C0003842;C0221464|||1|0.0077|  
IA|artery|C0003842;C0226004|||1|0.017|  
IA|class II MHC|C0017349|||1|0.0217|  
IA|class II antigen|C0019630|||1|0.017|  
IA|class II molecules|||1|0.0085|  
IA|component|C0449432;C1179435;C1705248|||1|0.0077|  
IA|ibotenic acid|C0020738|||C0020738|MSH;NDFRT;SNOMEDCT|1|0.0232|1  
IA|ideational apraxia|C0234526|||1|  
IA|image amplification|||1|  
IA|image analysis|C0200765|||C0200765|NCI;SNOMEDCT|1|0.0356|  
IA|immune -associated antigen|||1|  
IA|immune adherence|C0301893|||C0301893|SNOMEDCT|1|0.0162|1  
IA|immune-associated|||1|0.0077|  
IA|immunoadsorption|||1|0.0433|  
IA|immunoassay|C0020980;C0021060|||1|0.007|  
IA|immunobiologic activity|||1|  
IA|impedance angle|||1|  
IA|imperforate anus|C0003466|||1|  
IA|inactive alcoholic|||1|  
IA|incidental appendectomy|C0192882|||1|  
IA|incisors absent|||1|0.0062|  
IA|incurred accidentally|||1|  
IA|indocyanine green angiography|C0430879|||1|0.017|  
IA|indolaminergic-accumulating|||1|  
IA|indulin agar|||1|  
IA|infantile apnea|C0745261|||1|  
IA|infantile autism|C0004352|||C0004352|AOD;CHV;MSH;SNOMEDCT|1|0.0077|1  
IA|infarct area|||1|0.0085|  
IA|infected area|||1|  
IA|inferior angle|||1|  
IA|inferior apical|||1|  
IA|inflammatory arthritis|C0003864|||1|0.0124|  
IA|infrequent asthma|||1|  
IA|inhibitory antigen|||1|

IA|inhibitory avoidance|||||1|0.0193|  
IA|injected intra-arterially|||||1|0.007|  
IA|innominate artery|C0006094|||||1|0.0054|  
IA|insulin|C0021641;C1533581;C1579433|||||1|0.0085|  
IA|interarytenoid|||||1|0.0101|  
IA|interbronchial angle|||||1|  
IA|internal auditory|||||1|  
IA|intestinal amebiasis|C0013370;C0860230|||C0013370|CHV;MSH;NDFRT|||  
IA|intimal area|||||1|0.0116|  
IA|intra-abdominal|C1512910|||||1|0.0093|  
IA|intra-amniotic;intraamniotic|C1512912|||C1512912|NCI|||1|  
IA|intra-arterially;intraarterially|||||1|0.0333|  
IA|intraalveolar|||||1|  
IA|intraaortic|||||1|  
IA|intraatrial|||||1|  
IA|intraauricular|||||1|  
IA|intracranial aneurysm|C0007766|||||1|0.0124|  
IA|invasive aspergillosis|C0238013|||||1|0.0897|1|  
IA|iodoacetamide|C0021973|||||1|0.0155|  
IA|irradiation area|||||1|  
IA|isonicotinic acid|C0022210|||||1|  
IA|isopropyl  
alcohol|C0022237|||C0022237|AOD;CHV;MSH;MTH;MTHSPL;NCI;NDFRT;RXNORM;SNOMEDCT;VAN  
DF|||1|  
IA|osteopetrotic|||||1|0.0124|  
IA|transient K+ current|||||1|0.0139|  
IA|transient outward current|||||1|0.0139|  
IA|transient potassium current|||||1|0.0116|  
IB|(cycle) IB|||1|0.004|||||  
IB|(grade) IB|||1|0.016|||||  
IB|(stage) IB|C0456597;C0457152|1|0.944|||||  
IB|(status) IB|||1|0.016|||||  
IB|(type) IB|||1|0.004|||||  
IB|ATP|||C1366832;C1705556|NCI|||  
IB|ATP8A2|||C1366832|NCI|||  
IB|ATP8A2 wt Allele;ATPase, Aminophospholipid Transporter-Like, Class I, Type  
8A, Member 2 wt Allele|C1705556|||C1705556|MTH;NCI|||  
IB|ATPIB|||C1366832;C1705556|NCI|||  
IB|ATPase, Aminophospholipid Transporter-Like, Class I, Type 8A, Member 2;ML-1  
Protein|C1366832|||C1366832|MTH;NCI|||  
IB|DKFZP434B1913|C1366832;C1705556|||C1366832;C1705556|NCI|||  
IB|IB;Ib;IMMUNOBLOT;Immunoblot;Immunoblotting;immunoblot;immunoblotting;Immunobl  
ot Analysis;Immunoblot Assay;Immunoblot assay;Immunoblot assay, NOS;assays  
immunoblot;immunoblot  
assay;Immunoblottings|C0020985|||C0020985;C0444976;C1366832;C1705556|AOD;CHV;CSP  
;LNC;MSH;MTH;NCI;SNOMEDCT|1|0.1373|  
IB|Ib (qualifier value)|||C0444976|SNOMEDCT|||  
IB|Ib serotype;Serotype Ib;serotype Ib|C0444976|||C0444976|CHV;MTH;SNOMEDCT|||  
IB|Immunoblot assay (procedure)|||C0020985|SNOMEDCT|||  
IB|Immunoblotting (qualifier value)|||C0020985|SNOMEDCT|||  
IB|ML-1|||C1366832;C1705556|NCI|||  
IB|Serotype Ib (qualifier value)|||C0444976|SNOMEDCT|||  
IB|binding|C0243122;C1145667;C1167622|||||1|0.0423|  
IB|ibuprofen|C0020740|||||1|0.1373|  
IB|idiopathic blepharospasm|||||1|  
IB|ileal bypass|C0399975|||||1|  
IB|immune balance|||||1|

IB|immune body|||||||1  
 IB|inclusion bodies;inclusion body|C0007637|||C0007637|CHV;CSP;GO;MSH|1|0.0563|1  
 IB|index of body build|||||||1  
 IB|infantile botulism|C0238027|||||||1  
 IB|infectious bronchitis|||||1|0.1549|1  
 IB|inferior basal|||||||1  
 IB|insulin receptor binding test|||||||1  
 IB|integrated backscatter|||||1|0.1585|  
 IB|interferon beta|C0015980;C0751599;C2825876|1|0.002|||||  
 IB|international baccalaureate||1|0.010|||||  
 IB|intrinsic bursting|||||1|0.0352|  
 IB|intrinsically bursting|||||1|0.0563|  
 IB|ipratropium  
 bromide|C0700580|||C0700580|CHV;MSH;MTHSPL;NCI;NDFRT;RXNORM;SNOMEDCT;USPMG;VANDF  
 |1|0.2218|  
 IB|irradiated bone|C0022098|||||||1  
 IB|isolation bed|||||||1  
 ICA|Antibody to islet cells of pancreas measurement;ICA;Islet cell antibody  
 measurement;Islet cell cytoplasm  
 antibody|C0201519|||C0201519|LNC;MTH;SNOMEDCT|||  
 ICA|Antibody to islet cells of pancreas measurement  
 (procedure)|||C0201519|SNOMEDCT|||  
 ICA|Ca2+ channels|||||1|0.0027|  
 ICA|Ca2+ currents|||||1|0.0384|  
 ICA|Immunocytochemical assay;immunocytochemical assay|||||1|0.0097|1  
 ICA|Independent component analysis|||||1|0.0769|  
 ICA|L-type Ca2+ current|||||1|0.0349|  
 ICA|L-type calcium current|||||1|0.0198|  
 ICA|arthritis|C0003864|||||1|0.0047|  
 ICA|calcium currents|||||1|0.0326|  
 ICA|icariin|C0063273|||C0063273|MSH|||  
 ICA|ileocolic anastomosis|C0192751|||||||1  
 ICA|intercellular adhesion|||||1|0.0035|  
 ICA|intercountry adoption|C0175800|||||||1  
 ICA|intermediate care area|||||||1  
 ICA|internal carotid|C0741978|||||1|0.0113|  
 ICA|internal carotid  
 artery|C0007276|1|1.000|C0007276|CHV;FMA;LNC;MSH;NCI;SNOMEDCT;UWDA|1|0.5606|1  
 ICA|intracranial abscess|C0021874|||||||1  
 ICA|intracranial anatomy|||||||1  
 ICA|intracranial  
 aneurysm|C0007766|||C0007766|CHV;CSP;CST;MEDLINEPLUS;MSH;NCI;NDFRT;OMIM;SNOMEDCT  
 |||1  
 ICA|inward calcium current|||||1|0.0159|  
 ICA|ionized Ca|||||1|0.0039|  
 ICA|ionized calcium|C0201927;C0373561;C0596235|||||1|0.0268|1  
 ICA|iridocorneal angle|C0229238|||C0229238|FMA;SNOMEDCT;UWDA|||  
 ICA|islet cell antibodies;islet cell  
 antibody|C0063900|||C0063900|CHV;MSH;MTH;SNOMEDCT|1|0.1378|1  
 ICA|islet cell antibody (ICAb) test|||C0201519|CHV|||  
 ICA|islet cell antigen|||||||1  
 ICA|islet cell autoantibodies|||||1|0.007|  
 ICA|islet cells|C0022131|||||1|0.0136|  
 ICD|Between Lunch and Dinner;between lunch and  
 dinner|C1550747|||C1550747|MTH;NCI|||  
 ICD|Cardioverter Defibrillators, Implantable;Cardioverter-Defibrillator,  
 Implantable;Cardioverter-Defibrillators, Implantable;Implantable Cardioverter

Defibrillators;Implantable Cardioverter-Defibrillator;Implantable Cardioverter-Defibrillators;Implantable Cardioverter-defibrillator;implantable cardioverter defibrillator;implantable cardioverter-defibrillator;Defibrillator, Implantable;Defibrillators, Implantable;Implantable Defibrillator;Implantable Defibrillators;Implantable defibrillator;defibrillator implantable;implantable defibrillator;implantable defibrillators;Implantable defibrillator, device;automatic defibrillator;automatic defibrillators;internal defibrillator;internal defibrillators|C0162589|1|1|C0162589|CHV;CSP;MEDLINEPLUS;MSH;MTH;NCI;SNOMEDCT|1|0.6737|1  
 ICD|Cell Disease, Inclusion;Cell Diseases, Inclusion;Disease, Inclusion Cell;Diseases, Inclusion Cell;INCLUSION CELL DISEASE;Inclusion Cell Disease;Inclusion Cell Diseases;Inclusion-cell Disease;inclusion cell disease;Deficiency of N-acetylglucosamine-1-phosphotransferase;N-Acetylglucosamine-1-phosphotransferase deficiency;Disease, I-Cell;Diseases, I-Cell;I Cell Disease;I cell disease;I-CELL DISEASE;I-Cell Disease;I-Cell Diseases;I-cell disease;cell disease i;i cell disease;i-cell disease;I-cell - Inclusion cell disease;cell disease i cell inclusion;LEROY DISEASE;MUCOLIPIDOSIS II;Mucolipidosis II;mucolipidosis II;mucolipidosis ii;Mucolipidoses, Type II;Mucolipidosis Type II;Mucolipidosis type II;Mucolipidosis, Type II;Type II Mucolipidoses;Type II Mucolipidosis;mucolipidosis type ii;Mucolipidosis IIs;Mucolipidosis Type IIs|C0020725|C0020725|CHV;CSP;DXP;MSH;MTH;MTHICD9;NCI;OMIM;SNOMEDCT|1|0.0146|1  
 ICD|I CELL DIS|||C0020725|MSH|||  
 ICD|I-cell disease (disorder)|||C0020725|SNOMEDCT|||  
 ICD|ICD;icd;icds|C0020725;C0162589;C0870733;C1550747|||C0020725;C0162589;C0870733;C1550747|CHV;HL7V3.0;LNC;NCI;OMIM|||  
 ICD|INCLUSION CELL DIS|||C0020725|MSH|||  
 ICD|INTERNATIONAL CLASS DIS|||C0870733|MSH|||  
 ICD|INTERNATIONAL STATIS CLASS DIS RELAT HEALTH PROBLEMS|||C0870733|MSH|||  
 ICD|Implantable defibrillator, device (physical object)|||C0162589|SNOMEDCT|||  
 ICD|International Classification of Diseases;international Classification of Diseases;international classification of diseases (ICD)|C0870733|||C0870733|CHV;MSH;MTH;NCI|1|0.1383|1  
 ICD|International Statistical Classification of Diseases and Related Health Problems|||C0870733|MSH|||  
 ICD|Inventory for Counseling and Development|||1  
 ICD|ML II|C0020725;C0066972|||C0020725|OMIM|||  
 ICD|N-Acetylglucosamine-1-phosphotransferase deficiency (disorder)|||C0020725|SNOMEDCT|||  
 ICD|idiopathic cerebral dysfunction|||1  
 ICD|idiopathic cervical dystonia|||1|0.009|  
 ICD|immune complex disease|C0020951|||C0020951|CHV;CSP;MSH|||1  
 ICD|immune complex dissociation|||1|0.0106|1  
 ICD|immune complex-dissociated|||1|0.0155|  
 ICD|impulse control disorder|C0021122|||C0021122|AOD;CHV;SNOMEDCT|||1  
 ICD|indigocarmine dye|||1  
 ICD|induced circular dichroism|||1|0.0195|1  
 ICD|informed consent document|C0009797|||1  
 ICD|initial claudication distance|||1|0.0179|  
 ICD|initial consonant deletion|||1  
 ICD|inner canthal distance|||1  
 ICD|instantaneous cardiac death|||1  
 ICD|intercanthal distance|C1720475|||C1720475|SNOMEDCT|||1  
 ICD|intercapillary distance|||1|0.0081|  
 ICD|internal cardioverter-defibrillator|||1  
 ICD|internal cervical device|||1

ICD|intracardiac defibrillator|||||1  
ICD|intracellular domain|||||1|0.026|  
ICD|intracervical device|||||1  
ICD|intrauterine contraceptive device|C0021900|||C0021900|MSH;NCI;SNOMEDCT|||1  
ICD|irritant contact dermatitis|C0162823|||C0162823|CHV;NCI;SNOMEDCT|1|0.0423|1  
ICD|ischemic coronary disease|||||1  
ICD|isocitrate  
dehydrogenase|C0022157|||C0022157|CSP;LNC;MSH;NDFRT;SNOMEDCT|1|0.0244|1  
ICD|isolated conduction defect|||||1  
ID|(drug) ID||1|0.002|||||  
ID|DL|||C1522475|NCI|||  
ID|Descriptor|C0282354;C0600091;C0678257|||C0600091|NCI|||  
ID|Designation|C0600091;C1510813|||C0600091|NCI|||  
ID|Designator|C0600091|||C0600091|NCI|||  
ID|East Indies;IDN;Malay Archipelago;Netherlands East  
Indies|C0021247|||C0021247|MSH;NCI|||  
ID|I-DERMAL;I-dermal|||C1522475|NCI|||  
ID|IC|C0587121|||C1522475|NCI|||  
ID|ID;Id;Ids;id|C0020786;C0600091;C2986768|||C0020786;C0020787;C0021247;C0150647  
;C0600091;C1522475;C2349049;C2986768|AOD;CHV;LNC;MSH;NCI;SNOMEDCT|||  
ID|INDONESIA;Indonesia;indonesia|C0021247;C2987743|||C0021247|AOD;CHV;CSP;LCH;MS  
H;MTH;NCI;SNOMEDCT|||  
ID|INTRADERMAL;Intradermal;intradermal|C0150647|||C0150647;C1522475|CHV;HL7V2.5;  
MTH;NCI;SNOMEDCT|1|0.1495|1  
ID|Id Personality Component|C0020786|||C0020786|MTH|||  
ID|Idaho;idaho;Idaho (geographic  
location)|C0020787|||C0020787|AOD;CHV;LCH;MSH;MTH;NCI;SNOMEDCT|||  
ID|Identifier;identifier;identifiers|C0600091;C1554104;C1554159|||C0600091;C1554  
104;C1554159|CHV;HL7V3.0;LNC;MTH;NCI;SNOMEDCT|1|0.0146|  
ID|Identifier (property)|||C0600091|SNOMEDCT|||  
ID|Identifier (property) (qualifier value)|||C0600091|SNOMEDCT|||  
ID|Indonesia (geographic location)|||C0021247|SNOMEDCT|||  
ID|Injected Dose;injected dose|C2986768|||C2986768|MTH;NCI|1|0.0231|1  
ID|Intracutaneous;intracutaneous;Intracutaneous use;Intradermal Route of  
Administration;Intradermal Route of Drug Administration;Intradermal  
route;IntradermalRoute;Intradermal  
use|C1522475|||C1522475|HL7V3.0;MTH;NCI;SNOMEDCT|||  
ID|Intracutaneous route|C0205524;C1522475|||C1522475|SNOMEDCT|||  
ID|Intracutaneous route (qualifier value)|||C1522475|SNOMEDCT|||  
ID|Intradermal Injection|C0021489;C1522475|||C1522475|NCI|||  
ID|Intradermal route (qualifier value)|||C1522475|SNOMEDCT|||  
ID|Intradermal use (qualifier value)|||C1522475|SNOMEDCT|||  
ID|Unit of Infective Dose|C2349049|||C2349049|MTH;NCI|||  
ID|anti-idiotypic|||||1|0.0207|  
ID|anti-idiotypic|||||1|0.0182|  
ID|given either iv or intraduodenally|||||1|0.0024|  
ID|identification|C0020792;C0205396|1|0.002|C0020792;C0205396|LCH;LNC;MSH;MTH;NC  
I|1|0.0188|1  
ID|identify|||||1  
ID|idiotopes|||||1|0.0164|  
ID|idiotype|C0021013|||C0021013|CHV;NCI;SNOMEDCT|1|0.1118|1  
ID|idiotypic|||||1|0.0213|1  
ID|iditol dehydrogenase|C0020809|||||1  
ID|ill-defined|||||1  
ID|immune deficiency|C0850497|||C0850497|CHV|||1  
ID|immunodeficiency|C0021051|||C0021051|AOD;CHV;CSP;NCI;OMIM;SNOMEDCT|||  
ID|immunodiffusion|C0017231|||C0017231|CHV;CSP;MSH;SNOMEDCT|1|0.0705|1

ID|immunoglobulin deficiency|C0745242||||||1  
ID|inappropriate disability||||||1  
ID|incapacitating dose||||||1  
ID|incidence density|||||1|0.0115|  
ID|incision and drainage|C0152277|1|0.002|||||  
ID|inclusion disease|C0010823||||||1  
ID|index of difficulty|||||1|0.0049|  
ID|index of discrimination||||||1  
ID|individual dose||||||1  
ID|indomethacin|C0021246|||||1|0.0097|  
ID|induction delivery||||||1  
ID|infant death|C0549159||||||1  
ID|infant-directed|||||1|0.0073|  
ID|infecting dose||||||1  
ID|infectious  
disease|C0009450|1|0.988|C0009450;C1555764|CHV;COSTAR;CSP;HL7V3.0;LNC;MSH;NCI;SN  
OMEDCT|1|0.0304|1  
ID|infective dermatitis|C1260874|||C1260874|CHV;MTH;SNOMEDCT|1|0.0049|  
ID|infective dose|C1881203||||||1  
ID|infradentale|C2326002||||||1  
ID|inhibitor of DNA binding|||||1|0.0043|  
ID|inhibitor of differentiation|||||1|0.0055|  
ID|inhibitory dose||||||1  
ID|inhomogeneous deposition||||||1  
ID|initial diagnosis||||||1  
ID|initial dose||||||1  
ID|initial dyskinesia||||||1  
ID|inner diameter||1|0.002|||||1  
ID|insertion/deletion|||||1|0.0091|  
ID|inside diameter||||||1  
ID|insufficient data||||||1  
ID|intellectual disability|C0025362|||C0025362|CHV;MSH;SNOMEDCT|1|0.1385|1  
ID|intercalated disc|C0684215|||C0684215|CSP;FMA;GO;MTH;UWDA|||  
ID|intercalated duct|C1512817|||C1512817|NCI|||  
ID|interdigitating||||||1  
ID|interhemispheric disconnection||||||1  
ID|internal derangement|||||1|0.0249|1  
ID|internal diameter|C2314970|||C2314970|SNOMEDCT|1|0.0578|1  
ID|interscan delay||||||1  
ID|interstitial disease|C1881236||||||1  
ID|intervertebral  
disc|C0021815;C1280211|||C0021815;C1280211|CHV;FMA;MSH;NCI;SNOMEDCT;UWDA|||  
ID|intradermally|||||1|0.0541|  
ID|intraduodenal|||C1512937|NCI;SNOMEDCT|1|0.0492|1  
ID|intraduodenal administration|||||1|0.0055|  
ID|iodine deficiency|C0342199|||C0342199|CHV;MTHICD9;SNOMEDCT|1|0.0152|  
ID|iron deficiency|C0240066|||C0240066|AOD;CHV;DXP;MTH;OMIM;SNOMEDCT|1|0.0401|  
ID|iron dextran|C0022092|||C0022092|CHV;MTHSPL;NCI;NDFRT;SNOMEDCT;USPMG;VANDF|||  
ID|iron-deficient|||||1|0.0213|  
ID|isosorbide  
dinitrate|C0022252|||C0022252|AOD;CHV;CSP;MSH;MTH;MTHSPL;NCI;NDFRT;RXNORM;SNOMED  
CT;USPMG;VANDF|1|0.0134|  
ID|isotope dilution|||||1|0.0085|  
ID|mg/kg intraduodenally|||||1|0.003|  
ID|microm inner diameter|||||1|0.0049|  
ID|one-dimensional|||||1|0.0061|  
ID|primary immunodeficiency|C0398686;C2984310|||||1|0.003|

ID|the same|||||||1  
IJ|ileojejunal|||||||1  
IJ|internal jugular|C1550269|1|1.000|||||1  
IJ|intrajejunal|||||||1  
IJ|intrajugular|||||||1  
IJ|junctional current|||||||1|1|  
IM|At risk for impaired home maintenance management;at risk for impaired home maintenance management;Impaired home maintenance management, potential|C0231377|||C0231377|CHV;MTH;SNOMEDCT|||  
IM|At risk for impaired home maintenance management (finding)||||C0231377|SNOMEDCT|||  
IM|IM;Im|||C0021492;C0022132;C0231377;C0442117;C1522005|MSH;NCI;SNOMEDCT|||  
IM|IM - Intramuscular|||C0442117|SNOMEDCT|||  
IM|IM - Intramuscular injection;intramuscular (IM) injections;IM injection;im injection;im injections;IMI - Intramuscular injection;Injection, Intramuscular;Injection, intramuscular;Injections, Intramuscular;Intramuscular Injection;Intramuscular Injections;Intramuscular injection;Intramuscular injection NOS;intramuscular injection;intramuscular injections;Intramuscular Route of Administration|C0021492|||C0021492|AOD;CHV;CSP;HL7V3.0;LCH;MSH;MTH;NCI;SNOMEDCT|1|0.0059|  
IM|IMMUNOL|C1517844|||C1522005|MSH|||  
IM|IMN;ISLE OF MAN;Isle of Man|C0022132|||C0022132|MSH;MTH;NCI;SNOMEDCT|||  
IM|INJECT INTRAMUSCULAR;INTRAMUSCULAR INJECT|||C0021492|MSH|||  
IM|INTRAMUSCULAR;Intramuscular;intramuscular|C0021492;C0442117|1|0.922|C0021492;C0442117;C1556154|CHV;HL7V2.5;MTH;NCI;SNOMEDCT|1|0.2258|1  
IM|Index Medicus|C0021194|||||||1  
IM|Indomethacin;indomethacin|C0021246|||C0021246|AOD;CHV;CSP;LCH;LNC;MSH;MTH;MTH FDA;MTHSPL;NCI;NDFRT;PDQ;RXNORM;SNOMEDCT;USPMG;VANDF|1|0.0646|  
IM|Induced motion|||||||1|0.0041|  
IM|Infant mortality;infant mortality|C0021278|||C0021278|AOD;CHV;CSP;MSH;NCI|1|0.0059|  
IM|Intramuscular (qualifier value)|||C0442117|SNOMEDCT|||  
IM|Intramuscular drug therapy|||C0021492|SNOMEDCT|||  
IM|Intramuscular injection (procedure);Intramuscular injection NOS (procedure)|||C0021492|SNOMEDCT|||  
IM|Isle of Man (geographic location)|||C0022132|SNOMEDCT|||  
IM|M-current|||||||1|0.0164|  
IM|administered intramuscularly|||||||1|0.01|  
IM|current|C0521116;C1705970|||||||1|0.0127|  
IM|ice massage|C0695940|||||||1  
IM|idiopathic myelofibrosis|C0001815|||C0001815|CHV;NCI;PDQ|1|0.0164|1  
IM|imatinib|C0935989|||C0935989|CHV;MSH;NCI;NDFRT;RXNORM;SNOMEDCT;USPMG;VANDF|||  
IM|imatinib mesylate|C0939537|||C0939537|CHV;LNC;MSH;MTH;MTHSPL;NCI;NDFRT;PDQ;RXNORM;SNOMEDCT;USPMG;VANDF|1|0.0068|  
IM|imidazole|C0020923;C0020924|||C0020923;C0020924|CHV;CSP;LCH;MSH;MTH;SNOMEDCT|1|0.0164|  
IM|imipramine|C0020934|||C0020934;C0020935|AOD;CHV;CSP;LCH;LNC;MSH;MTH;NCI;NDFRT;RXNORM;SNOMEDCT;USPMG;VANDF|||  
IM|immature|C0205252|||C0205252|CHV;LNC;NCI;SNOMEDCT|||  
IM|immobilization|C0020944|||C0020944|CHV;LNC;MSH;SNOMEDCT|1|0.0086|  
IM|immunology|C0152036;C1522005|||C1522005|MSH|||  
IM|immunology aspects|C1522005|||C1522005|MTH|||  
IM|immunosuppression method|||||||1  
IM|impaired mentation|||||||1  
IM|industrial medicine|C0028802|||||||1

IM|infantile myofibromatosis|C0432284||C0432284|MTH;SNOMEDCT|1|0.0091|  
IM|infection medium|||||||1  
IM|infectious  
mononucleosis|C0021345||C0021345|AIR;AOD;CHV;COSTAR;DXP;ICD9CM;ICPC;MEDLINEPLUS  
;MSH;MTH;NCI;NDFRT;QMR;SNOMEDCT|1|0.1966|1  
IM|inflammatory myopathy|C0027121||C0027121|CHV;MSH;NDFRT;SNOMEDCT|1|0.0041|  
IM|inner medulla|||||1|0.0141|  
IM|inner medullary|||||1|0.0055|  
IM|inner membrane|||||1|0.0123|1  
IM|innocent murmur|C0232255|||||||1  
IM|inspiratory muscle|||||||1  
IM|integrative medicine|C2350258||C2350258|MEDLINEPLUS;MSH|||  
IM|intermediate|C0205103;C1550465;C2827755|||||1|0.0077|  
IM|intermediate megaloblast|||||||1  
IM|intermediate mesoderm|C1284010||C1284010|MSH;NCI;SNOMEDCT|||  
IM|intermetatarsal|||||1|0.0064|1  
IM|intermuscular|||||||1  
IM|internal malleolus|||||||1  
IM|internal mammary|||||1|0.0082|1  
IM|internal margin|||||||1  
IM|internal  
medicine|C0021782;C1555750||C0021782;C1555750|CHV;HL7V3.0;LCH;MSH;NCI;SNOMEDCT|  
1|0.0218|1  
IM|internal monitor|||||||1  
IM|interstitial macrophages|||||1|0.0064|  
IM|interval mapping|||||1|0.0023|  
IM|intestinal malrotation|C0221210;C2749839|||||||1  
IM|intestinal mesenchyme|||||||1  
IM|intestinal metaplasia|C0334037||C0334037|CHV;NCI;SNOMEDCT|1|0.122|1  
IM|intima-media|||||1|0.0064|  
IM|intracellular macroadenoma|||||||1  
IM|intracellular membrane;intracellular  
membranes|C0021868||C0021868|CSP;FMA;MSH;NCI|1|0.0023|  
IM|intrahepatic metastasis|||||1|0.0096|  
IM|intramedullary|C1512957;C2732619|1|0.076|C1512957;C2732619|NCI;SNOMEDCT|1|0.0  
296|1  
IM|intramembranous|||||1|0.0046|  
IM|intramuscularly|||||1|0.1224|  
IM|invasive mole|C0008493||C0008493|CHV;MSH;MTHICD9;NCI;NDFRT;PDQ;SNOMEDCT|||1  
IM|ionomycin|C0022020||C0022020|CSP;MSH;NCI;NDFRT;PDQ;SNOMEDCT|1|0.0041|  
IM|irsogladine maleate|C0091573||C0091573|MSH|||  
IM|myocardial infarction|C0027051;C2926063|||||1|0.005|  
INH|4-Pyridinecarboxylic acid, hydrazide;Hydrazide, Isonicotinic  
Acid;Isonicotinic Acid Hydrazide;Isonicotinic acid hydrazide;isonicotinic acid  
hydrazide;INA - Isoniazid;INAH -  
Isoniazid;ISONIAZID;Isoniazid;isoniazid;isonicotinyl Hydrazine;isonicotinyl  
hydrazine;Isonicotinylhydrazide|C0022209|1|0.93|C0022209|AOD;CHV;CSP;LCH;LNC;MSH  
;MTH;MTHSPL;NCI;NDFRT;PDQ;RXNORM;SNOMEDCT;USPMG;VANDF|1|0.9547|  
INH|By  
inhalation;INHALATION;Inhalation;inhalation;{Inhalation}|C0004048;C0205535;C1705  
211||C0205535;C1705211|HL7V2.5;HL7V3.0;NCI;SNOMEDCT|||1  
INH|By inhalation (route)|||C0205535|SNOMEDCT|||  
INH|By inhalation (route) (qualifier value)|||C0205535|SNOMEDCT|||  
INH|INH;Inh;inh|||C0022209;C0205535;C0598322;C1705211|CHV;CSP;NCI;PDQ;SNOMEDCT|  
||  
INH|INHALANT;Inhalant;inhalant;inhalants|C0001559;C0598322;C2362548;C2825042|||C  
0598322|AOD;CHV;CSP;HL7V3.0;NCI;NDFRT;RXNORM|||

INH|Inhalant Dosage Form;Inhalant Dose Form;Inhalant [Dose Form];Inhalant dose form|C0598322|||C0598322|MTH;NCI;NDFRT|||  
INH|Inhalation - unit of product usage;Inhalation Dosing Unit|C1705211|||C1705211|MTH;NCI;SNOMEDCT|||  
INH|Inhalation - unit of product usage (qualifier value)|||C1705211|SNOMEDCT|||  
INH|Inhalation Route of Administration;Inhalation Route of Drug Administration;RESPIR|C0205535|||C0205535|MTH;NCI|||  
INH|Isoniazid (product)|||C0022209|SNOMEDCT|||  
INH|Isoniazid (substance)|||C0022209|SNOMEDCT|||  
INH|Isoniazid [Chemical/Ingredient]|||C0022209|NDFRT|||  
INH|RESPIRATORY (INHALATION)|||C0205535|NCI|||  
INH|Respiratory use|||C0205535|SNOMEDCT|||  
INH|immunoreactive inhibin|||1|0.0117|  
INH|inhaler|C0021461;C1881212;C2825043|1|0.070|||1|  
INH|inhibitor|C1999216|||1|0.022|  
INH|isoniazide|||1|0.0117|  
INR|INR|C0525032;C1704538|||C0525032;C1704538|AOT;CHV;LNC;MSH;NCI|||  
INR|INR - Internationalised ratio;INR - Internationalized ratio;International Normalized Ratio;International Normalized Ratios;International normalised ratio;International normalized ratio;Normalized Ratio, International;Normalized Ratios, International;Ratio, International Normalized;Ratios, International Normalized;international normalised ratio;international normalising ratio;international normalize ratio;international normalized ratio;international normalized ratios;international normalizing ratio;International Normalized Ratio of Prothrombin Time;Internationalised ratio;Internationalized ratio;internationalised ratio;international normalized ratio (INR)|C0525032|1|1|C0525032|CHV;MSH;MTH;NCI;SNOMEDCT|1|0.8545|1  
INR|Integrated Neuromusculoskeletal Release|C1704538|||C1704538|AOT;MTH|||  
INR|International normalised ratio (procedure)|||C0525032|SNOMEDCT|||  
INR|International normalized ratio (observable entity)|||C0525032|SNOMEDCT|||  
INR|Prothrombin Intl. Normalized Ratio|||C0525032|NCI|||  
INR|Prothrombin time|C0033707|||1|0.0137|  
INR|bcr|||C0525032|CHV|||  
INR|immediate nasal response|||1|  
INR|initiator|C1444748|||1|0.0918|  
INR|initiator element|||1|0.0332|  
INR|insulin receptor|C0034818;C1334133|||1|0.0068|  
IOL|IOL;iol;Primary Intraocular Lymphoma|C0281658|||C0281658|CHV;NCI;PDQ|||  
IOL|Intraocular Lymphoma;Intraocular lymphoma;intraocular lymphoma;lymphoma, intraocular;intraocular lymphoma (IOL)|C0281658;C1706527|||C0281658|CHV;MTH;NCI;PDQ|||  
IOL|induction of labor|C0259787|||1|  
IOL|interosseous ligament|C0447892|||1|0.0968|  
IOL|intraocular lens;intraocular lenses|C0023311;C0023319;C0336564|1|1|C0023319;C0336564;C1706007|CHV;MSH;NCI;SNOMEDCT|1|0.7849|1  
IOL|intraocular lens implantation|C0023311|||1|0.1183|  
IQ|2-Amino-3-methylimidazo[4,5-f]quinoline;2-amino-3-methylimidazo(4,5-f)-quinoline;2-amino-3-methylimidazo[4,5-f]quinoline|||C1312059|MSH;MTH;NCI|1|0.4927|  
IQ|2-amino-3-methyl-3H-imidazo[4,5-f]quinoline|C2744043|||1|0.0134|  
IQ|2-amino-3-methyl-imidazo[4,5-f]quinoline|||1|0.0334|  
IQ|3-Methyl-3H-imidazo[4,5-f]quinolin-2-amine|||C1312059|NCI|||  
IQ|5-f]quinoline|||1|0.016|  
IQ|IQ;iq|||C0022066;C0456149;C1312059|CHV;CSP;NCI|||  
IQ|IQ - Intelligence quotient;intelligence quotient (IQ);Intelligence quotient;intelligence quotient|C0456149|1|1|C0456149|CHV;MTH;SNOMEDCT|1|0.3632|1

IQ|IRAQ;Iraq;IRQ|C0022066|||C0022066|AOD;CHV;LCH;MSH;MTH;NCI;SNOMEDCT|||  
IQ|IZ|||C0022066|NCI|||  
IQ|Ilimaquinone;ilimaquinone|C1171731|||C1171731|MSH|1|0.0134|  
IQ|Intelligence quotient (observable entity)|||C0456149|SNOMEDCT|||  
IQ|Iraq (geographic location)|||C0022066|SNOMEDCT|||  
IQ|intelligence|C0021704|||1|0.0534|  
IQ|interquartile|||1|0.0147|  
IQ|interquartile range|C1711350|||C1711350|NCI|||  
IR|Calcitonin gene-related peptide (CGRP)-immunoreactive|||1|0.0024|  
IR|INNERV|||C1619351|MSH|||  
IR|IR;Ir|C0022065;C0022071|||C0022065;C0022071;C1619351|MSH;NCI|||  
IR|IRAN;Iran;iran;IRN|C0022065|||C0022065|AOD;CHV;LCH;MSH;MTH;NCI;SNOMEDCT|||  
IR|IRIDIUM;Iridium;Iridium,  
NOS;iridium|C0022071;C0885452|||C0022071|AOD;CHV;CSP;LCH;MSH;MTH;NCI;NDFRT;SNOME  
DCT|||1  
IR|Incomplete Repair|||1|0.0018|  
IR|Infra-red;infrared|C1532326|1|0.002|C1532326|SNOMEDCT|1|0.119|1  
IR|Insulin resistance;insulin  
resistance|C0021655;C2700570|||C0021655;C2700570|CHV;CSP;LCH;MEDLINEPLUS;MSH;MTH  
;NDFRT;OMIM;SNOMEDCT|1|0.0605|1  
IR|Interventional radiology;interventional  
radiology|C0034602;C0344093|1|0.788|C0034602;C0344093|CHV;LNC;MSH;MTH;NCI;PDQ;SN  
OMEDCT|1|0.0039|1  
IR|Intrarectal;intrarectal|||1|0.003|1  
IR|Ir element;Iridium Metallicum|C0022071|||C0022071|CSP;NCI|||  
IR|Iran (geographic location)|||C0022065|SNOMEDCT|||  
IR|Iran, Islamic Republic of|||C0022065|NCI|||  
IR|Iridium (substance)|||C0022071|SNOMEDCT|||  
IR|Iridium [Chemical/Ingredient]|||C0022071|NDFRT|||  
IR|Ischemia-reperfusion;ischaemia-reperfusion;ischemia and  
reperfusion|||1|0.0679|1  
IR|Ratio|C0456603;C1547037|||1|0.0071|  
IR|current|C0521116;C1705970|||1|0.002|  
IR|idiopathic rhinitis|||1  
IR|ileal resection|C0399935|||C0399935|CHV;SNOMEDCT|||1  
IR|imidazoline receptors|C0063390|||1|0.0026|  
IR|immediate-release|C1708470|1|0.204|||1|0.0333|1  
IR|immune  
response|C0301872|||C0301872|AOD;CHV;CSP;GO;MTH;NCI;SNOMEDCT|1|0.0225|1  
IR|immunization rate|||1  
IR|immunologic response|||1  
IR|immunoreactive|||1|0.1679|1  
IR|immunoreactivity|C0597879|||1|0.1843|  
IR|immunoreagent|||1  
IR|impedance rheography|||1  
IR|implantation rate|||1|0.0035|  
IR|inactive renin|C0072249|||1|0.0039|  
IR|incidence rate|C1708485|||1|0.0136|  
IR|incisal ridge|||1  
IR|index of response|||1  
IR|individual reaction|||1  
IR|inferior rectus|C0224129;C0582819|||1|0.0043|1  
IR|inflow resistance|||1  
IR|information  
retrieval|C0021427;C0079623|||C0021427;C0079623|AOD;CHV;CSP;MSH;MTH|1|0.0049|  
IR|infrared spectroscopy|C0260249|||1|0.0122|  
IR|infrarenal|||1

IR|inhibition rate|||||1|0.0047|  
IR|innervation|C0021516;C0026828;C1619351|||C1619351|GO;MSH|||  
IR|innervation aspect|C1619351|||C1619351|MTH|||  
IR|inside radius|||||1|  
IR|insoluble residue|||||1|  
IR|inspiratory reserve|||||1|  
IR|inspiratory resistance|||||1|  
IR|insulin receptor|C0034818;C1334133|||||1|0.1068|1  
IR|insulin requirement|||||1|  
IR|insulin response|||||1|  
IR|insulin-resistant|||||1|0.0067|  
IR|integer ratio|||||1|  
IR|intelligence ratio|||||1|  
IR|intergenic region|C0887859|||||1|0.0026|  
IR|intermediate risk|||||1|0.003|  
IR|internal reduction|C0745350|||||1|  
IR|internal resistance|||||1|  
IR|internal rotation|C0231459|1|0.004|C0231459|CHV;SNOMEDCT;UWDA|1|0.0032|1  
IR|intrarenal|||||1|0.0022|1  
IR|intrastent restenosis|||||1|  
IR|inversion recovery|||||1|0.0311|1  
IR|inverted repeat;inverted repeats|||||1|0.0258|1  
IR|ionizing irradiation|||||1|0.0016|  
IR|ionizing  
radiation|C0034538|||C0034538|AOD;CHV;CSP;MSH;MTH;NCI;SNOMEDCT|1|0.0822|1  
IR|irritant reaction|||||1|  
IR|isotonic reversal|||||1|  
IR|isovolumetric relaxation|||||1|  
IR|isovolumic relaxation|C2924435|||C2924435|LNC|1|0.001|  
IR|min of reperfusion|||||1|0.0008|  
IR|near-infrared|||||1|0.0047|  
IR|nerve supply|C0021516;C1619351|||C1619351|MSH|||  
IR|reaction|C0443286;C1114821|||||1|0.0018|  
IR|resistance index|C0807745|||||1|0.0012|  
IS|DNA Insertion Element;DNA Insertion Elements;Element, DNA Insertion;Elements,  
DNA Insertion;Insertion Element, DNA;Insertion Elements, DNA;Insertion  
Sequence;insertion sequence;insertion  
element|C0600204|||C0600204|CSP;MSH;MTH;NCI|1|0.1256|1  
IS|IC|C0587121|||C0020750|NCI|||  
IS|ICELAND;Iceland;iceland;ISL|C0020750|||C0020750|AOD;CHV;CSP;DXP;LCH;MSH;MTH;N  
CI;SNOMEDCT|||  
IS|IL|C0020898;C0021764;C0022271|||C0022271|NCI|||  
IS|IMMUNE SUPPRESSION;immune  
suppression|C0021079;C1373218;C1840264|1|0.002|C1840264|MTH;OMIM|||1  
IS|INSTRUM|||C0021632|MSH|||  
IS|IS;Is;is|||C0020750;C0021632;C0022271;C0441913;C0600204;C1556119;C1840264|HL  
7V3.0;MSH;NCI;OMIM;SNOMEDCT|||  
IS|IS Element|||C0600204|NCI|||  
IS|ISCW;ISSCW|C1840264|||C1840264|OMIM|||  
IS|ISR;ISRAEL;Israel;israel|C0022271|||C0022271|AOD;CHV;CSP;LCH;MSH;MTH;NCI;SNOM  
EDCT|||  
IS|Iceland (geographic location)|||C0020750|SNOMEDCT|||  
IS|Infantile spasms;infantile  
spasm|C0037769|||C0037769|CHV;MSH;NCI;OMIM|1|0.0497|1  
IS|Insertion Sequence Element|C0205742;C0600204|||C0600204|NCI|||  
IS|International Standard;international standard|||||1|0.0369|1  
IS|Ionescu-Shiley|||||1|

IS|Israel (geographic location)|||C0022271|SNOMEDCT|||  
IS|STREPTOCOCCAL CELL WALL ANTIGEN, SUPPRESSION OF IMMUNE RESPONSE  
TO|||C1840264|OMIM|||  
IS|Supernumerary maxillary left first primary|C1556119|||C1556119|MTH|||  
IS|currently active tumor stage;is (tumor  
staging)|C0441913|||C0441913|CHV;MTH;SNOMEDCT|||  
IS|idiopathic  
scoliosis|C0595995|||C0036440;C0595995|CHV;ICD9CM;MTH;SNOMEDCT|1|0.0235|  
IS|ileal segment;ilial segment|C0440779|||C0440779|SNOMEDCT|||1  
IS|iliosacral|||||||1  
IS|immediate sensitivity|||||||1  
IS|immobilization stress|||||1|0.0087|  
IS|immune serum|C0020960|||C0020960|CHV;CSP|1|0.0047|1  
IS|immune suppressor|||||||1  
IS|immune  
system|C0020962|||C0020962|AOD;CHV;CSP;FMA;LCH;LNC;MEDLINEPLUS;MSH;MTH;NCI;SNOME  
DCT;UWDA|1|0.0121|  
IS|immunological synapse|C1171348|||||1|0.0168|  
IS|immunoscintigraphy|C0085264|||C0085264|NCI|1|0.0349|  
IS|immunostaining|||||1|0.006|  
IS|immunosuppressed|||||1|0.0087|  
IS|immunosuppression|C0021079;C0021080;C1373218|||C0021079;C0021080;C1373218|AOD  
;CHV;CSP;LCH;MSH;NCI;NDFRT;PDQ;SNOMEDCT|1|0.0201|  
IS|immunosuppressive|C0021081|||C0021081|CHV;CSP;NCI|1|0.0228|  
IS|immunosuppressive substance|||||1|0.0074|  
IS|immunosuppressive therapy|C0021079|||||1|0.0074|  
IS|imperative stimulus|||||1|0.0047|  
IS|impingement syndrome|C0263912|||C0263912|CHV;COSTAR;SNOMEDCT|||1  
IS|in situ|||||||1  
IS|incentive spirometer|C1961253|1|0.006|C1961253|CHV|||1  
IS|incentive spirometry|C0454512|||C0454512|CHV;MTH;SNOMEDCT|1|0.0101|  
IS|index of saponification|||||||1  
IS|index of sexuality|||||||1  
IS|indoxyl sulfate|C0021210|||C0021210|MSH;NDFRT|1|0.0074|  
IS|induced sputum|C3179346|||C3179346|MSH|1|0.0369|1  
IS|inescapable shock|||||||1|0.0215|  
IS|infant size|||||||1  
IS|infarct size|||||||1|0.0994|  
IS|information system;information systems|C0021428|1|0.002|||1|0.0262|1  
IS|infrahyoid strap|||||||1  
IS|initial segment|C1523840|||C1523840|GO|1|0.0134|1  
IS|inner segments|||||||1|0.0067|  
IS|insertion|C0021107;C0441587;C1512796;C1883719|||C0441587;C1512796;C1883719|CH  
V;HL7V3.0;LNC;NCI;SNOMEDCT|1|0.0067|  
IS|instrumentation|C0021632;C0348000;C1704339|||C0021632|MSH|||  
IS|instrumentation aspects|C0021632|||C0021632|MTH|||  
IS|insufficient signal|||||||1  
IS|insulin secretion|C1256369|||||||1  
IS|insulin sensitivity|C0920563|||||1|0.0322|  
IS|intercellular space|C0015352|||C0015352|FMA;GO;MSH;SNOMEDCT;UWDA|||1  
IS|intercostal space|C0230136;C1269872|||||||1  
IS|interictal spike|||||||1  
IS|internal standard|||||||1|0.2411|1  
IS|interspace|||||||1  
IS|interstitial space|C0225319|||C0225319|AOD;CHV;FMA;SNOMEDCT;UWDA|||1  
IS|interventricular septum|C0225870|||||1|0.0034|1  
IS|intracardial shunt|||||||1

IS|intraspinal|C1283188|||C1283188;C1522227|CHV;MTH;NCI;SNOMEDCT|||1  
IS|intrasplenic|||1  
IS|intraatriatal|||1  
IS|invalided from service|||1  
IS|inventory of systems|||1  
IS|ionic strength|C0086486|||C0086486|CSP;MSH;NCI|1|0.0107|  
IS|ionized serum||1|0.002|||1  
IS|ipecac syrup|C0022046|||1  
IS|ischaemic stroke;ischemic  
stroke|C0948008|||C0948008|CHV;MTH;OMIM;SNOMEDCT|1|0.051|  
IS|ischemia|C0022116|||C0022116|AOD;CHV;COSTAR;CSP;LCH;MSH;MTH;NCI;NDFRT;SNOMEDC  
T|1|0.006|  
IS|ischemic|C0475224|||C0475224|CHV;MTH;SNOMEDCT|||  
IS|ischemic score|||1  
IS|island|C0022130|||1  
IS|islet|||1  
IS|isolation|C0204727;C0205409;C0220862|||1  
IS|isoproterenol|C0022245|||C0022245|AOD;CHV;CSP;LCH;MSH;NCI;NDFRT;RXNORM;SNOMED  
CT;USPMG;VANDF|||  
IS|isosorbide|C0022251|||C0022251|AOD;CHV;MSH;MTHSPL;NCI;NDFRT;RXNORM;SNOMEDCT;U  
SPMG;VANDF|||  
IS|isotonic saline|||1|0.0054|  
IS|score|C0449820|||1|0.0107|  
IS|slow inward current|||1|0.0141|  
IS|space|C1883067|||1|0.0067|  
ITP|AITP;Autoimmune Thrombocytopenic Purpura;Autoimmune Thrombocytopenic  
Purpuras;Autoimmune thrombocytopenic purpura;Purpura, Autoimmune  
Thrombocytopenic;Purpura, Thrombocytopenic, Autoimmune;Purpuras, Autoimmune  
Thrombocytopenic;THROMBOCYTOPENIC PURPURA, AUTOIMMUNE;Thrombocytopenic Purpura,  
Autoimmune;Thrombocytopenic Purpuras, Autoimmune;Disease, Werlhof;Disease,  
Werlhof's;WERLHOF DISEASE;Werlhof Disease;Werlhof's Disease;Werlhof's  
disease;Werlhofs Disease;werlhof's disease;IDIOPATHIC THROMBOCYTOPENIC  
PURPURA;Idiopathic Thrombocytopenic Purpura;Idiopathic Thrombocytopenic  
Purpuras;Idiopathic purpura (& thrombocytopenic);Idiopathic thrombocytopenic  
purpura;Idiopathic thrombocytopenic purpura, NOS;PURPURA, THROMBOCYTOPENIC,  
IDIOPATHIC;Purpura, Idiopathic Thrombocytopenic;Purpura, Thrombocytopenic,  
Idiopathic;Purpuras, Idiopathic Thrombocytopenic;Thrombocytopenic Purpura,  
Idiopathic;Thrombocytopenic Purpuras, Idiopathic;idiopathic thrombocytopenic  
purpura;ITP - Idiopathic thrombocytopenic purpura;ITP - idiopathic  
thrombocytopenic purpura;Idiopathic thrombocytopenic purpura (ITP);idiopathic  
thrombocytopenic purpura (ITP);Idiopathic Thrombocytopenia Purpura;Idiopathic  
purpura;Idiopathic purpura, NOS;idiopathic  
purpura|C0043117|1|1|C0043117|CHV;COSTAR;DXP;MSH;MTH;MTHICD9;NCI;NDFRT;OMIM;SNOM  
EDCT|1|0.8418|1  
ITP|IMMUNE THROMBOCYTOPENIC PURPURA;immune thrombocytopenic  
purpura|C0043117;C0398650|||C0043117;C0398650|CHV;ICD9CM;MTH;NCI;OMIM;SNOMEDCT||  
|1  
ITP|ITP;ITP,  
NOS|C0021540;C0043117|||C0021540;C0043117|CHV;DXP;MSH;NCI;NDFRT;OMIM;SNOMEDCT|||  
ITP|ITP - Inosine triphosphate;inosine triphosphate (ITP);Inosine  
Triphosphate;Inosine triphosphate;Triphosphate, Inosine;inosine  
triphosphate|C0021540|||C0021540|CHV;MSH;MTH;NDFRT;SNOMEDCT|1|0.0154|1  
ITP|Ideopath thrombocytopenic pur|||C0043117|SNOMEDCT|||  
ITP|Idiopathic Thrombocytopenia;idiopathic  
thrombocytopenia|C0043117;C0920163|||C0043117;C0920163|CHV;MTH;NCI;OMIM|1|0.0224  
|

ITP|Idiopathic purpura (& thrombocytopenic) (disorder);Idiopathic thrombocytopenic purpura (disorder)|||C0043117|SNOMEDCT|||  
ITP|Inosine 5'-(tetrahydrogen triphosphate)|||C0021540|MSH;NDFRT|||  
ITP|Inosine Triphosphate [Chemical/Ingredient]|||C0021540|NDFRT|||  
ITP|Inosine triphosphate (substance)|||C0021540|SNOMEDCT|||  
ITP|Ion transport peptide|||1|0.0077|  
ITP|Purpura, Thrombocytopenic, Idiopathic [Disease/Finding]|||C0043117|NDFRT|||  
ITP|Thrombocytopenia Due to Platelet  
Alloimmunization|C0043117;C0272286|||C0043117|NCI|||  
ITP|WERLHOF DIS;WERLHOFS DIS|||C0043117|MSH|||  
ITP|capillary isotachophoresis|||1|0.0208|  
ITP|immune thrombocytopenia|C0272286|||C0272286|CHV;NCI;OMIM;SNOMEDCT|1|0.0486|  
ITP|inosine 5'-triphosphate|||1|0.0093|  
ITP|interim treatment plan;interim treatment planning|||1|1|  
ITP|intrathoracic pressure|||1|0.0247|  
ITP|inverse treatment plan;inverse treatment planning|||1|1|  
ITP|islet-cell tumor of pancreas|||1|1|  
ITP|isotachophoresis|C0022257|||C0022257|MSH|||  
ITP|isotachophoretic|||1|0.0093|  
IT|(drug) IT||1|0.004|||  
IT|Ca2+ current|||1|0.0058|  
IT|INTRATHECAL;Intrathecal;intrathecal|C1370196|1|0.116|C0677897;C1370196|CHV;HL7V2.5;NCI;SNOMEDCT|1|0.4525|1  
IT|IT|||C0022277;C0677897|NCI|||  
IT|ITA;ITALY;Italy;italy|C0022277|||C0022277|AOD;CHV;CSP;LCH;MSH;MTH;NCI;SNOMEDCT|||  
IT|Immune Tolerance|C0020963|||1|0.0043|  
IT|Intrathecal Route of Administration;Intrathecal Route of Drug Administration;Intrathecal use;into the spinal space|C0677897|||C0677897|CHV;MTH;NCI;SNOMEDCT|||  
IT|Intrathecal route;IntrathecalRoute|C0205527;C0677897|||C0677897|HL7V3.0;SNOMEDCT|||  
IT|Intrathecal route (qualifier value)|||C0677897|SNOMEDCT|||  
IT|Intrathymic;intrathymic|||1|0.0274|  
IT|Intratracheal;intratracheal|||C1522653|NCI;SNOMEDCT|1|0.0987|1  
IT|Italy (geographic location)|||C0022277|SNOMEDCT|||  
IT|administered intrathecally|||1|0.0232|  
IT|iliotibial||1|0.080|||1|  
IT|immature-to-total neutrophil||1|0.002|||1|  
IT|immunity test|||1|1|  
IT|immunologic test;immunological test|C0021061|||C0021061|CHV;MSH|||1|  
IT|immunotherapy|C0021083|||C0021083|AOD;CHV;CSP;LCH;MSH;MTH;NCI;SNOMEDCT|||1|  
IT|immunotoxin|C0021084|||C0021084|CHV;CSP;MSH;NCI;NDFRT;PDQ|1|0.0616|  
IT|immunotoxin therapy|C0796507|||1|1|  
IT|implantation test|||1|1|  
IT|incentive therapy|||1|1|  
IT|individual therapy|C0204525|||C0204525|AOD;CHV|||1|  
IT|inferior temporal|||1|0.0303|1|  
IT|inferior temporal cortex|||1|0.0125|  
IT|inferior turbinate|C0225434|||1|1|  
IT|inferotemporal|||1|0.0125|  
IT|inferotemporal cortex|||1|0.0082|  
IT|information technology|C0021423;C0683867|1|0.206|C0021423;C0683867|AOD;CHV;NCI|1|0.1021|1|  
IT|information transfer|C0681300|||1|0.0024|  
IT|inhalation test|||1|1|  
IT|inhalation therapy|C0021459|||1|1|

IT|injected intrathecally|||||1|0.0207|  
IT|injected intratumorally|||||1|0.0029|  
IT|injection|C0021485;C1272883;C1533685|||||1|0.0043|  
IT|injection time|||||1|  
IT|inspection time|||||1|0.0082|  
IT|inspiratory time|C0428686|1|0.002|||||1|  
IT|insulin therapy|||||1|  
IT|insulin treatment|C0745343|||||1|  
IT|intact|C0205266;C1554187|||||1|  
IT|intensive therapy|||||1|0.0039|1|  
IT|intentional tremor|||||1|  
IT|intermediate trophoblast|C1512865;C2335060|||||1|0.0077|  
IT|intermittent traction|C0565524|||||1|  
IT|internal thoracic|||||1|  
IT|interstitial tissue|C0225318|||C0225318|CHV;SNOMEDCT|||1|  
IT|intertrochanteric|C0745355|1|0.028|||||1|  
IT|intertuberous|||||1|  
IT|intestinal transplantation|||||1|0.0067|  
IT|intimal thickening|||||1|  
IT|intimal thickness|||||1|0.0048|  
IT|intolerance and toxicity|||||1|  
IT|intracellular tachyzoite|||||1|  
IT|intradermal test|C0021881|||C0021881|AOD;CHV;MSH|||1|  
IT|intratesticular|||C1517559|NCI;SNOMEDCT|||1|  
IT|intrathoracic|C0595836|||C0595836|NCI;SNOMEDCT|1|0.0063|1|  
IT|intratracheal instillation|C1555389|||||1|0.0091|  
IT|intratracheally|||||1|0.0347|  
IT|intratumoral|C1517564|||C1517564|NCI|1|0.0346|1|  
IT|ischial  
tuberosity|C0223656;C1279109|1|0.096|C0223656;C1279109|CHV;FMA;SNOMEDCT;UWDA|||1|  
IT|isomeric transition|||||1|  
IT|pravastatin or atorvastatin evaluation and infection therapy||1|0.002|||||  
IT|specific immunotherapy|||||1|0.0082|  
IT|treatment|C0039798;C0087111;C1522326;C1533734;C1705169;C3161471|||||1|0.0063|  
IUD|Contraceptive Device, Intrauterine;Contraceptive Devices,  
Intrauterine;Device, Intrauterine Contraceptive;Devices, Intrauterine  
Contraceptive;Intrauterine Contraceptive Device;Intrauterine Contraceptive  
Devices;Intrauterine contraceptive device;intrauterine contraceptive  
device;Contraceptive IUD;Contraceptive IUDs;IUD, Contraceptive;IUDs,  
Contraceptive;Device, Intrauterine;Devices, Intrauterine;INTRAUTERINE  
DEVICE;Intra Uterine Device;Intra-uterine device;Intrauterine  
Device;Intrauterine Devices;Intrauterine device;device intrauterine;devices  
intra uterine;devices intrauterine;intra uterine device;intra-uterine  
device;intrauterine device;intrauterine devices;IUCD;iucd;IUD - Intrauterine  
device;intrauterine devices  
(IUD)|C0021900|1|1|C0021900;C1546682;C1548866;C1706306|CHV;DXP;HL7V2.5;MSH;MTH;N  
CI;SNOMEDCT|1|1|1|  
IUD|IUCD - Intrauterine contraceptive device|||C0021900|SNOMEDCT|||  
IUD|IUD;iuds|C0021900;C1706306|||C0021900;C1706306|CHV;CSP;NCI;SNOMEDCT|||  
IUD|Intrauterine Device Dosage Form;Intrauterine Device Dose  
Form|C1706306|||C1706306|MTH;NCI|||  
IUD|Intrauterine contraceptive device (physical object)|||C0021900|SNOMEDCT|||  
IUD|Intrauterine device (physical object)|||C0021900|SNOMEDCT|||  
IUD|Intrauterine device (product)|||C0021900|SNOMEDCT|||  
IUD|Intrauterine device (qualifier value)|||C0021900|SNOMEDCT|||  
IUD|interuncal distance|||||1|

IUD|intrauterine  
death|C0015927;C0595939|||C0015927;C0595939|CCS;CHV;OMIM;SNOMEDCT|||1  
IUGR|(Fetal growth retardation NOS) or (intrauterine growth  
retardation)|||C0015934|SNOMEDCT|||  
IUGR|(Fetal growth retardation NOS) or (intrauterine growth retardation)  
(disorder)|||C0015934|SNOMEDCT|||  
IUGR|FGR - Fetal growth retardation|||C0015934|SNOMEDCT|||  
IUGR|Fet growth retard wtNOS|||C0015934|ICD9CM|||  
IUGR|Fetal Growth Restriction;Fetal growth restriction;Fetal Growth  
Retardation;Fetal growth retardation;Fetal growth retardation NOS;Fetal growth  
retardation, NOS;Foetal growth retardation, NOS;Growth Retardation,  
Fetal;Retardation, Fetal Growth;fetal growth retardation;Fetal growth  
retardation, unspecified;Fetal growth retardation, unspecified [weight];Fetal  
growth retardation, unspecified weight;Growth Retardation,  
Intrauterine;Intrauterine Growth Retardation;Intrauterine growth  
retardation;Intrauterine growth retardation, NOS;Retardation, Intrauterine  
Growth;growth intrauterine retardation;intrauterine growth  
retardation;IUGR;iugr;iugrs;IUGR - Intrauterine growth retardation;Intrauterine  
growth retardation (IUGR);Intrauterine Growth Restriction;Intrauterine growth  
restriction;growth intrauterine restriction;intrauterine growth  
restriction;Intrauterine growth retarded;intrauterine growth  
retard;Microsomia;microsomia;Microsomic baby;Poor fetal growth;poor fetal  
growth;Poor fetal growth state;prenatal growth  
disorder|C0015934|1|1|C0015934|CHV;CSP;ICD9CM;MSH;MTH;MTHICD9;NCI;NDFRT;OMIM;SNO  
MEDCT|1|0.9692|1  
IUGR|Fetal Growth Retardation [Disease/Finding]|||C0015934|NDFRT|||  
IUGR|Fetal growth retardation (disorder);Fetal growth retardation NOS  
(disorder)|||C0015934|SNOMEDCT|||  
IUGR|Insufficiency - placental|||C0015934|SNOMEDCT|||  
IUGR|Intrauterine growth retardatn.|||C0015934|SNOMEDCT|||  
IUGR|growth retarded fetuses|||1|0.0047|  
IUGR|intrauterine growth rate|||1|  
IUGR|intrauterine growth-restricted|||1|0.026|  
IUPC|IUPC;Intrauterine pressure catheter;intrauterine pressure  
catheter;Intrauterine pressure catheter,  
device|C1443347|1|1|C1443347|MTH;SNOMEDCT|||1  
IUPC|Intrauterine pressure catheter, device (physical  
object)|||C1443347|SNOMEDCT|||  
IUP|intraurethral pressure|||1|0.15|  
IUP|intrauterine pregnancy|C0149973|1|1.000|C0149973|CHV;SNOMEDCT|1|0.52|1  
IUP|intrauterine pressure|||1|0.33|1  
IU|F2|C0439453;C1414504|||C0439453|NCI|||  
IU|INTERNATIONAL UNITS;International Unit;International Units;Unit  
International;international unit;international unit(s);international  
units;IU;[iU];iu;ius;International Unit of Biological  
Activity|C0439453|1|1|C0439453|CHV;HL7V3.0;MTH;NCI;SNOMEDCT|1|0.7606|1  
IU|IU (qualifier value)|||C0439453|SNOMEDCT|||  
IU|Indiana University|||1|0.0585|  
IU|Intrauterine;intrauterine|C0694756|||1|0.1117|1  
IU|idiopathic uveitis|||1|0.0319|  
IU|immunizing unit|||1|  
IU|in utero|C1708480|||1|  
IU|infectious unit|||1|  
IU|intermediate uveitis|C0042166|||1|0.0372|  
IU|international units (qualifier value)|||C0439453|SNOMEDCT|||  
IU|iodouracil|C0063801|||C0063801|MSH|||  
IVC|individually viable cell|||1|

IVC|indwelling venous catheter|||||||1  
IVC|inferior vena cava;inferior vena  
cavae|C0042458;C1269024|1|0.998|C0042458;C1269024|CHV;FMA;MSH;NCI;SNOMEDCT;UWDA|  
1|0.9046|1  
IVC|inferior vena caval|C0521360|||||1|0.0505|  
IVC|inferior venacavogram|||||||1  
IVC|inferior venacavograph|||||||1  
IVC|inferior venacavography|||||||1  
IVC|inspiratory vital capacity|C0429710|||C0429710|SNOMEDCT|1|0.0213|1  
IVC|inspired vital capacity|||||||1  
IVC|integrated vector control|||||||1  
IVC|intravascular coagulation|||||||1  
IVC|intravenous chemotherapy|C0413365|||||||1  
IVC|intravenous  
cholangiogram|C0203082;C1548869|||C0203082;C1548869|CHV;HL7V2.5;ICD9CM;MTH;SNOME  
DCT|||1  
IVC|intravenous cholangiograph|||||||1  
IVC|intravenous cholangiography|C0203082|||C0203082|CHV|1|0.0237|1  
IVC|intraventricular catheter|||||||1  
IVC|intraventricular conduction|C0489574|||||||1  
IVC|isovolumic contraction|C2923410|||||||1  
IVF|Artificial Fertilization;artificial fertilization;Fertilization in  
Vitro;Fertilization in vitro;Fertilizations in Vitro;In Vitro Fertilization;In  
Vitro Fertilizations;In vitro fertilisation;In vitro fertilization;In-vitro  
fertilisation;In-vitro fertilization;fertilisation in vitro;fertilization in  
vitro;in vitro Fertilization;in vitro fertilisation;in vitro fertilization;in-  
vitro fertilisation;vitro fertilisation;vitro fertilization;Fertilization, Test-  
Tube;Fertilizations, Test-Tube;Test Tube Fertilization;Test-Tube  
Fertilization;Test-Tube Fertilizations;test-tube fertilization;In vitro  
fertilisation procedure;In vitro fertilization procedure;Test tube baby  
technique;Test tube ovum fertilisation;Test tube ovum  
fertilization|C0015915|1|0.616|C0015915|CHV;CSP;ICD10PCS;LCH;MEDLINEPLUS;MSH;MTH  
;MTHCH;NCI;SNOMEDCT|1|0.9695|1  
IVF|CDCD2|C1419864;C1832680|||C1419864|HUGO|||  
IVF|CMPD2|C1413522;C1419864|||C1419864|HUGO|||  
IVF|HB1|C1419864;C1825768|||C1419864|HUGO|||  
IVF|HB2|C1419864;C1825769|||C1419864|HUGO|||  
IVF|HBBB|C1419864;C1879286|||C1419864|HUGO|||  
IVF|HH1;ICCD;NAV1.5;Nav1.5;PFHB1;SCN5A;SCN5A  
gene|C1419864|||C1419864|HUGO;LNC;MTH;OMIM|||  
IVF|IVF|C0015915;C1419864|||C0015915;C1419864|CHV;CSP;HUGO;MEDLINEPLUS;NCI;SNOME  
DCT|||  
IVF|In vitro fertilisation procedure (procedure)|||C0015915|SNOMEDCT|||  
IVF|LQT3;long QT syndrome 3|C1419864;C1859062|||C1419864|HUGO|||  
IVF|Other Procedures @ Physiological Systems and Anatomical Regions @ Other  
Procedures @ None @ External @ Other Method @ In Vitro  
Fertilization|||C0015915|ICD10PCS|||  
IVF|SODIUM CHANNEL, VOLTAGE-GATED, TYPE V, ALPHA SUBUNIT;sodium channel,  
voltage-gated, type V, alpha subunit|C1121069;C1419864|||C1419864|HUGO;OMIM|||  
IVF|SSS1|C1419864;C1425415;C1837845|||C1419864|HUGO|||  
IVF|Test tube ovum fertilization (procedure)|||C0015915|SNOMEDCT|||  
IVF|idiopathic ventricular fibrillation|C0340493|||C0340493|MSH;OMIM|1|0.0073|  
IVF|in vitro fertilization (IVF)|||C0015915|CHV|||  
IVF|in vivo fertilization|C0232905|||||||1  
IVF|interventricular  
foramen|C0016520;C1281034|||C0016520;C1281034|CHV;FMA;NCI;SNOMEDCT;UWDA|||1

IVF|intervertebral  
 foramen|C0223085;C1281347|||C0223085;C1281347|CHV;FMA;SNOMEDCT;UWDA|||1  
 IVF|intravascular fluid|||||1  
 IVF|intravenous fluid|C1289919|1|0.376|C1289919|CHV;NCI;SNOMEDCT|1|0.0045|1  
 IVF|intravenous fluorescein|||||1  
 IVF|intravertebral foramen|||||1  
 IVF|vitro fertilization and embryo transfer|||||1|0.0032|  
 IVF|vitro fertilized|||||1|0.0155|  
 IVIG|Antibodies, Intravenous;Intravenous Antibodies;IV Immunoglobulins;IV  
 immunoglobulin;Immunoglobulins, IV;IVIG;Immune Globulin Intravenous;Immune  
 Globulin, Intravenous;Intravenous Immune Globulin;intravenous immune  
 globulin;Immunoglobulins, Intravenous;Intravenous Immunoglobulins;Intravenous  
 immunoglobulin;intravenous immunoglobulin;intravenous  
 immunoglobulins;Intravenous IG;intravenous  
 Ig|C0085297|1|1|C0085297|CHV;MSH;MTH;NDFRT;PDQ;RXNORM;SNOMEDCT|1|0.9057|1  
 IVIG|GLOBULIN, IMMUNE (IV);Immune Globulin IV;Immune globulin IV;IG IV;IGIV;IV  
 IG|C0085297;C1527233|||C0085297|HL7V2.5;HL7V3.0;MSH;NDFRT;PDQ;SNOMEDCT;VANDF|||  
 IVIG|Immune globulin IV (product)|||C0085297|SNOMEDCT|||  
 IVIG|Immune globulin IV (substance)|||C0085297|SNOMEDCT|||  
 IVIG|Immunoglobulins, Intravenous [Chemical/Ingredient]|||C0085297|NDFRT|||  
 IVIG|Intravenous immunoglobulin (product)|||C0085297|SNOMEDCT|||  
 IVIG|Intravenous immunoglobulin (substance)|||C0085297|SNOMEDCT|||  
 IVIG|intravenous IgG|||||1|0.0082|  
 IVIG|intravenous gamma globulin;intravenous gammaglobulin|||||1|0.0441|  
 IVIG|intravenous immunoglobulin G|||||1|0.0247|  
 IVIG|intravenous immunoglobulin preparations|||||1|0.0075|  
 IVIG|intravenous immunoglobulin therapy|||||1|0.0097|  
 IVP|Consent Type - IVP|C1548873|||C1548873|MTH|||  
 IVP|IVP;ivp|C0203108;C1548873|||C0203108;C1548873|CHV;HL7V2.5;NCI|||  
 IVP|IVP - Intravenous pyelogram;intravenous pyelogram (IVP);IVU - Intravenous  
 urogram;Intravenous Pyelogram;Intravenous pyelogram;Intravenous pyelogram,  
 NOS;intravenous pyelogram;Intravenous Pyelography;intravenous  
 pyelography;Intravenous pyelogram without KUB;Intravenous urogram;intravenous  
 urogram;Intravenous urography;Intravenous urography, NOS;intravenous  
 urography;Intravenous urography without KUB;excretory  
 urography;pyelogram;pyelograms|C0203108|||C0203108|CCS;CHV;ICD9CM;MTH;NCI;SNOMED  
 CT|1|0.596|1  
 IVP|Intravenous pyelogram (procedure)|||C0203108|SNOMEDCT|||  
 IVP|Intravenous urogram (procedure)|||C0203108|SNOMEDCT|||  
 IVP|Retired procedure (procedure) [P5-60030]|||C0203108|SNOMEDCT|||  
 IVP|Retired procedure [P5-60030]|||C0203108|SNOMEDCT|||  
 IVP|excretory urogram|||||1|0.0458|  
 IVP|intravascular pressure|||||1  
 IVP|intravenous push|C1319196|||C1319196|NCI;SNOMEDCT|||1  
 IVP|intravenous pyelograph||1|1.000|||||1  
 IVP|intraventricular pressure|C0206177|||C0206177|CHV;CSP;MSH|1|0.0974|1  
 IVP|intravesical pressure|C0232843|||||1|0.0315|1  
 IVP|vitro embryo production|||||1|0.0229|  
 IVP|vitro produced|||||1|0.1547|  
 IVP|vitro production|||||1|0.0516|  
 IV|CI|||C0022326|NCI|||  
 IV|CIV|||C0022326|NCI|||  
 IV|COTE D'IVOIRE;Cote d'Ivoire;cote d'ivoire;Ivory Coast;coast ivory;ivory  
 coast;Republic of Cote  
 diIvoire|C0022326|||C0022326|AOD;CHV;LCH;MSH;MTH;NCI;SNOMEDCT|||  
 IV|Fourth|C0205438;C1706303|||C1706303|NCI|||  
 IV|Fourth (suffix)|C1706303|||C1706303|MTH|||

IV|INTRAVENOUS;Intravenous;intravenous;IV - Intravenous;intravenous  
(IV)|C0348016|1|0.97|C0348016;C1522726|CHV;HL7V2.5;MTH;NCI;SNOMEDCT|1|0.9365|1  
IV|IV;On IV;iv;Roman Numeral IV;Roman numeral  
IV|C0677510|||C0021440;C0022326;C0348016;C0677510;C1416522;C1522726;C1706303|CHV  
;CSP;HL7V2.5;HUGO;LNC;MTH;NCI;SNOMEDCT|||  
IV|IV (qualifier value)|||C0677510|SNOMEDCT|||  
IV|IV - Intravenous infusion;IV Infusion;IVI - Intravenous infusion;Intravenous  
infusion (procedure);Intravenous infusion procedures;Parenteral Infusion  
Procedure|C0021440|||C0021440|MTH;NCI;SNOMEDCT|||  
IV|IV gene;inversus situs, viscerum|C1416522|||C1416522|HUGO;MTH|||  
IV|IV route;iv route;Intravenous Route of Administration;Intravenous Route of  
Drug Administration;Intravenous use;intravenous use;intravenous  
uses|C1522726|||C1522726|CHV;MTH;NCI;SNOMEDCT|||  
IV|IV use;iv uses|||C1522726|CHV;SNOMEDCT|||  
IV|IVI - Intavenous infusion|||C0021440|SNOMEDCT|||  
IV|Infusion, Intravenous;Infusions, Intravenous;Intravenous Infusion;Intravenous  
Infusions;Intravenous infusion;Intravenous infusion, NOS;infusion  
intravenous;intravenous infusion;intravenous  
infusions|C0021440;C1272892;C1621368|||C0021440|CHV;MSH;NCI;SNOMEDCT|1|0.0032|  
IV|Intravenous (qualifier value)|||C0348016|SNOMEDCT|||  
IV|Intravenous infusion procedures (procedure)|||C0021440|SNOMEDCT|||  
IV|Intravenous injection;intravenous  
injection|C0021494|||C0021494|AOD;CHV;MSH;NCI;SNOMEDCT|1|0.0063|  
IV|Intravenous  
route;IntravenousRoute|C0205520;C1522726|||C1522726|HL7V3.0;SNOMEDCT|||  
IV|Intravenous route (qualifier value)|||C1522726|SNOMEDCT|||  
IV|Ivory Coast (geographic location)|||C0022326|SNOMEDCT|||  
IV|Parenteral Infusion|C0021440;C0021441|||C0021440|NCI|||  
IV|Roman numeral IV (qualifier value)|||C0677510|SNOMEDCT|||  
IV|SIV|||C1416522|HUGO|||  
IV|administered intravenously|||1|0.0436|  
IV|administration intravenous;intravenous  
administration|C0013125;C0021440|||C0021440|CHV|1|0.0034|  
IV|ichnovirus|C0999783|||C0999783|NCBI|||  
IV|ichthyosis  
vulgaris|C0079584|||C0079584|CHV;MSH;MTH;NCI;NDFRT;OMIM;SNOMEDCT|||1  
IV|immunodeficiency virus|C0682458|||1|1  
IV|in  
vitro|C0021135;C1533691;C2827718|||C0021135;C1533691;C2827718|CHV;MSH;MTH;NCI|||1  
IV|in vivo|C1515655|||C1515655|CHV;NCI|||1  
IV|injections|C0021485;C1533685|||1|0.0029|  
IV|inserted into the vein (IV)|||C0348016|CHV|||  
IV|interventricular|||1|1  
IV|intervertebral|C0442106|||C0442106|CHV;SNOMEDCT|||1  
IV|interview|C0021822;C0935630|||1|1  
IV|intravaginal|C0442122|||C0442122|CHV;NCI;SNOMEDCT|||1  
IV|intravascular|C0442123|||1|1  
IV|intravenous feeding|C0021910|||C0021910|CHV;CSP;MSH;MTH;SNOMEDCT|||1  
IV|intravenously|||1|1  
IV|intraventricular|C1517569|||C1517569;C1517571|MTH;NCI;SNOMEDCT|||1  
IV|intravertebral|||1|1  
IV|invasive|C0205281|||C0205281|CHV;LNC;MTH;NCI;SNOMEDCT|||1  
IV|inversion|C0021943;C0021945;C1705687;C2349984|||1|1  
IV|iodine value|||1|1  
IV|iridovirus|C0206467|||C0206467|MSH;NCBI;SNOMEDCT|||1  
IV|jugular vein|C0022427;C1280188|||1|0.0019|

IV|systemically|||||1|0.0022|  
 IV|vein infusion|C0021440;C1621368|||C0021440|CHV|||  
 JP|Aggressive Periodontitis;Periodontitis, Aggressive;Circumpubertal  
 Periodontitis;Periodontitis, Circumpubertal;JP - Juvenile periodontitis;JPD -  
 Juvenile periodontitis;PERIODONTITIS, AGGRESSIVE, 1;PERIODONTITIS,  
 PREPUBERTAL;Periodontitis, Prepubertal;Prepubertal Periodontitis;Prepubertal  
 periodontitis;Paradentosis;paradentosis|C0031106|||C0031106|CHV;MSH;NDFRT;OMIM;S  
 NOMEDCT|||  
 JP|Aggressive Periodontitis [Disease/Finding]||||C0031106|NDFRT|||  
 JP|Early-Onset Periodontitis|C0031106;C0399447|||C0031106|MSH;NDFRT|||  
 JP|JA|||C0022341|NCI|||  
 JP|JAPAN;Japan;JPN|C0022341|||C0022341|AOD;CHV;CSP;LCH;MSH;MTH;NCI;SNOMEDCT|||  
 JP|JP|C0022341;C0031106;C1421124|||C0022341;C0031106;C1421124|HUGO;NCI;OMIM|||  
 JP|JPD|C0031106;C0268414;C1416530|||C0031106|OMIM|||  
 JP|Jackson-Pratt||1|1.000|||1|  
 JP|Japan (geographic location)|||C0022341|SNOMEDCT|||  
 JP|Jobst pump|||||1|  
 JP|Juvenile Periodontitis;Juvenile periodontitis;PERIODONTITIS,  
 JUVENILE;Periodontitis, Juvenile;juvenile  
 periodontitis|C0031106;C1416530|||C0031106;C1416530|CHV;CSP;HUGO;MSH;MTH;NDFRT;O  
 MIM;SNOMEDCT|1|0.452|1|  
 JP|Juvenile papillomatosis|||||1|0.0565|  
 JP|Juvenile periodontitis (disorder)|||C0031106|SNOMEDCT|||  
 JP|PPP|C0031106;C0370219|||C0031106|OMIM|||  
 JP|Periodontosis;periodontosis|C0031106;C0600298|||C0031106|CHV;SNOMEDCT|||  
 JP|Prepubertal periodontitis (disorder)|||C0031106|SNOMEDCT|||  
 JP|T cell receptor gamma joining P;TRGJP;TRGJP  
 gene|C1421124|||C1421124|HUGO;MTH|||  
 JP|T-cell receptor, gamma, joining segment JP|||C1421124|HUGO|||  
 JP|jimpy|||||1|0.1695|  
 JP|joining peptide|||||1|0.0678|  
 JP|joint protection|||||1|  
 JP|juvenile parkinsonism|C0752105|||||1|0.1017|  
 JP|juvenile polyposis|C0345893|||C0345893|NCI|1|0.096|1|  
 JP|psychotropic drugs in Japanese pharmacopoeia|||||1|0.0565|  
 JVD|JUGULAR VENOUS DISTENTION;Jugular venous distension;jugular venous  
 distention;JVD;jvd;Jugular venous engorgement;Venous congestion of  
 neck|C0425687|1|1|C0425687|CHV;DXP;SNOMEDCT|||1|  
 JVD|Jugular venous engorgement (finding)|||C0425687|SNOMEDCT|||  
 JVP|jugular vein pulse|||||1|  
 JVP|jugular venous pressure|C0428897|1|1.000|C0428897|CHV;SNOMEDCT|1|1|1|  
 JVP|jugular venous pulsation|||||1|  
 JVP|jugular venous pulse|C0232133|||C0232133|SNOMEDCT|||1|  
 KBC|knowledge based charting||1|1.000|||1|  
 KCL|high potassium|C0856882|||||1|0.022|  
 KCL|potassium chloride|C0032825|1|1.000|||1|0.978|1|  
 KUB|KUB;Kidney-Ureter-Bladder;kidneys, ureters,  
 bladder|C1979912|1|1|C1979912|LNC;MTH|||1|  
 KUB|kidney ultrasound biopsy|||||1|  
 KUB|kidneys and urinary bladder|||||1|  
 L1|IGKV1-16;IGKV1-16 gene;IGKV116;immunoglobulin kappa variable 1-  
 16|C1416177|||C1416177|HUGO;MTH|||  
 L1|L1|C0441918;C1179698;C1416177|||C0441918;C1179698;C1416177|FMA;HUGO;NCI;SNOME  
 DCT;UWDA|||  
 L1|L1 Cancer Stage Finding;L1 Lymphatic Invasion Finding;L1 Lymphatic  
 Stage;Lymphatic Stage L1;Lymphatic stage L1;L1 Lymphatic Vessel Invasion

Finding;L1 Stage;L1 stage;L1 Stage Finding;L1 stage (finding);L1 TNM  
Finding|C0441918|||C0441918|MTH;NCI;SNOMEDCT|||  
L1|L1 innervation|C1179698|||C1179698|MTH|||  
L1|L1 stage (tumor staging)|||C0441918|SNOMEDCT|||  
L1|L1: lymphatic vessel invasion|||C0441918|SNOMEDCT|||  
L1|LINE-1|||1|0.2912|  
L1|Lymphatic stage L1 (tumor staging)|||C0441918|SNOMEDCT|||  
L1|deferiprone|C0043832|||C0043832|CHV;MSH;MTH;NCI;RXNORM;SNOMEDCT|||  
L1|first|C0205435;C1279901|||1|0.0769|  
L1|first language|C0557073|||C0557073|SNOMEDCT|1|0.1209|  
L1|first larval stage|||1|0.044|  
L1|first lumbar vertebra|C0223492|||C0223492|FMA;MTH;SNOMEDCT;UWDA|||  
L1|first-stage larvae|||1|0.1264|  
L1|iron chelator deferiprone|||1|0.0934|  
L1|lumbar (level) 1||1|1.000|||  
L1|lymphatic invasion|C1708790|||1|  
L1|major|C0205164|||1|0.0495|  
L1|major capsid protein|||1|0.0659|  
L1|native language|C1510558|||1|0.0549|  
L1|oral iron chelator 1,2-dimethyl-3-hydroxypyrid-4-one|||1|0.0769|  
L2|L2|C1179699;C1418789;C1825810|||C0332411;C1179699;C1418789;C1825810|FMA;HUGO;  
OMIM;SNOMEDCT;UWDA|||  
L2|L2 innervation|C1179699|||C1179699|MTH|||  
L2|L2 stage|C0332411|||C0332411|MTH;SNOMEDCT|||  
L2|L2 stage (finding)|||C0332411|SNOMEDCT|||  
L2|L2 stage (tumor staging)|||C0332411|SNOMEDCT|||  
L2|LGICZ;LGICZ1;ZACN;ZACN gene|C1825810|||C1825810|HUGO;MTH;OMIM|||  
L2|LIGAND-GATED ION CHANNEL, ZINC-ACTIVATED, 1|||C1825810|OMIM|||  
L2|LIPRIN-BETA-1;PPFIBP1;PPFIBP1 gene;PROTEIN-TYROSINE PHOSPHATASE, RECEPTOR-  
TYPE, F POLYPEPTIDE-INTERACTING PROTEIN-BINDING PROTEIN 1;PTPRF-INTERACTING  
PROTEIN-BINDING PROTEIN 1;hSGT2;hSgt2p|C1418789|||C1418789|HUGO;MTH;OMIM|||  
L2|PTPRF interacting protein, binding protein 1 (liprin beta  
1)|||C1418789|HUGO|||  
L2|SGT2|C1418789;C1428131|||C1418789|HUGO|||  
L2|ZAC;ZAC1|C1335223;C1709407;C1825810|||C1825810|HUGO;OMIM|||  
L2|Zn(2+)-ACTIVATED CHANNEL|||C1825810|OMIM|||  
L2|cell line|C0007600|||1|0.1846|  
L2|lumbar (level) 2||1|1.000|||  
L2|second language|C0557074|||C0557074|CHV;SNOMEDCT|1|0.5538|  
L2|second lumbar|||1|0.0769|  
L2|second lumbar (L2) nerve|||C1179699|CHV|||  
L2|second lumbar vertebra|C0223507|||C0223507|FMA;MTH;SNOMEDCT;UWDA|||  
L2|second-stage larvae|||1|0.1846|  
L2|zinc activated ligand-gated ion channel|||C1825810|HUGO|||  
L3|CerS2;FLJ10243;LAG1 homolog, ceramide synthase 2;LASS2;LASS2  
gene;SP260|C1422392|||C1422392|HUGO;MTH;OMIM|||  
L3|L3|C1179700;C1419655;C1422392|||C1179700;C1419655;C1422392|FMA;HUGO;UWDA|||  
L3|L3 innervation|C1179700|||C1179700|MTH|||  
L3|LAG1, S. CEREVISIAE, HOMOLOG OF, 2|||C1422392|OMIM|||  
L3|RIBOSOMAL PROTEIN L3;ribosomal protein  
L3|C0073294;C1419655|||C1419655|HUGO;OMIM|||  
L3|RPL3;RPL3 gene|C1419655|||C1419655|HUGO;MTH;OMIM|||  
L3|infective|||1|0.0571|  
L3|infective larvae|||1|0.4318|  
L3|infective larval|||1|0.0174|  
L3|infective stage larvae|||1|0.0323|  
L3|infective third-stage|||1|0.0099|

L3|infective third-stage larvae|||||1|0.0943|  
L3|larva|C0023047|||||1|0.0397|  
L3|level 3|C0456949|||C0456949|CHV;SNOMEDCT|||  
L3|lumbar (level) 3|||1|1.000|||||  
L3|lumbar vertebra|C0024091;C1269051|||||1|0.0273|  
L3|third|C0205437|||||1|0.072|  
L3|third larval stage|||||1|0.0199|  
L3|third lumbar (l3) nerve|||C1179700|CHV|||  
L3|third lumbar vertebra|C0223522|||C0223522|FMA;MTH;SNOMEDCT;UWDA|||  
L3|third stage|C0441771|||||1|0.0273|  
L3|third stage larvae|||||1|0.1712|  
L4|60S ribosomal protein L4;L4;RPL4;RPL4  
gene|C1419676|||C1179701;C1419676|FMA;HUGO;MTH;OMIM;UWDA|||  
L4|Fourth-stage larvae|||||1|0.5842|  
L4|L4 Segmental Innervation|C1179701|||C1179701|MTH|||  
L4|RIBOSOMAL PROTEIN L4;ribosomal protein  
L4|C0073302;C1419676|||C1419676|HUGO;OMIM|||  
L4|fourth larval stage|||||1|0.0693|  
L4|fourth lumbar|||||1|0.099|  
L4|fourth lumbar vertebra|C0223537|||C0223537|CHV;FMA;MTH;SNOMEDCT;UWDA|||  
L4|fourth-stage|||||1|0.1881|  
L4|layer 4|||||1|0.0594|  
L4|lumbar (level) 4|||1|1.000|||||  
L5|5th lumbar vertebra nerves;L5 Segmental  
Innervation|C1179702|||C1179702|CHV;MTH|||  
L5|Bone structure of L5;Fifth lumbar vertebra;fifth lumbar  
vertebra|C0223552|||C0223552|CHV;FMA;MTH;SNOMEDCT;UWDA|||  
L5|Bone structure of L5 (body structure)|||C0223552|SNOMEDCT|||  
L5|FLJ32011;KINOCILIN;kinocilin;KNCN;KNCN  
gene|C1969618|||C1969618|HUGO;MTH;OMIM|||  
L5|KINO|C1011810;C1969618|||C1969618|HUGO;OMIM|||  
L5|L5;l5|C1419683;C1969618|||C0223552;C1179702;C1419683;C1969618|CHV;FMA;HUGO;OM  
IM;UWDA|||  
L5|L5 VERTEBRA;L5 Vertebra;L5 vertebra;l5  
vertebra|C0223552;C1305617|||C0223552|CHV;FMA;NCI;UWDA|||  
L5|RIBOSOMAL PROTEIN L5;ribosomal protein  
L5|C0073304;C1419683|||C1419683|HUGO;OMIM|||  
L5|RPL5;RPL5 gene|C1419683|||C1419683|HUGO;MTH;OMIM|||  
L5|fifth lumbar|||||1|0.4167|  
L5|lumbar (level) 5|||1|0.998|||||  
L5|lumbar vertebra|C0024091;C1269051|||||1|0.5833|  
LAD|Anterior descending branch of left coronary artery;Anterior interventricular  
branch of left coronary artery;Anterior interventricular coronary artery;LEFT  
ANTERIOR DESCENDING CORONARY ARTERY;left anterior descending coronary  
artery;Left anterior descending artery;left anterior descending artery;Left  
anterior descending branch of left coronary artery;Structure of anterior  
descending branch of left coronary  
artery|C0226032|||C0226032|CHV;FMA;HCPCS;MTH;SNOMEDCT;UWDA|1|0.6001|  
LAD|BRANCHED CHAIN ALPHA-KETO ACID DEHYDROGENASE COMPLEX, E3 COMPONENT;DLD  
gene;DLDH;GCSL;GLYCINE CLEAVAGE SYSTEM L PROTEIN;LIPOAMIDE  
REDUCTASE;PHE3;PYRUVATE DEHYDROGENASE COMPONENT  
E3|C1414063|||C1414063|HUGO;MTH;OMIM|||  
LAD|CD18|||C1706333|NCI|||  
LAD|DIAPHORASE;DIHYDROLIPOAMIDE DEHYDROGENASE;dihydrolipoamide  
dehydrogenase;DIHYDROLIPOYL DEHYDROGENASE;LIPOAMIDE DEHYDROGENASE;Lipoamide  
dehydrogenase;lipoamide dehydrogenase;LIPOYL

DEHYDROGENASE|C0023783;C1414063|||C0023783;C1414063|HUGO;MSH;NDFRT;OMIM|1|0.0033  
 |1  
 LAD|DLD|C1414063;C2826331|||C1414063|HUGO;OMIM|||  
 LAD|E3|||C1414063|OMIM|||  
 LAD|E3 component of pyruvate dehydrogenase complex, 2-oxo-glutarate complex,  
 branched chain keto acid dehydrogenase complex|||C1414063|HUGO|||  
 LAD|ITGB2 wt Allele;LCAMB;MF17|C1706333|||C1706333|MTH;NCI|||  
 LAD|Integrin, Beta 2 (Antigen CD18 (p95), Lymphocyte Function-Associated Antigen  
 1; Macrophage Antigen 1 (MAC-1) Beta Subunit) wt Allele|||C1706333|NCI|||  
 LAD|LAD|||C0226032;C0398738;C1414063;C1706333|FMA;NCI;OMIM|||  
 LAD|LAD - Leucocyte adhesion deficiency type 1;LAD - Leukocyte adhesion  
 deficiency type 1;LAD-Type I;LEUKOCYTE ADHESION DEFICIENCY, TYPE I;LFA-1  
 deficiency;LFA-I Deficiency;LFA1 IMMUNODEFICIENCY;LYMPHOCYTE FUNCTION-ASSOCIATED  
 ANTIGEN 1 IMMUNODEFICIENCY;Lymphocyte function-associated antigen 1  
 immunodeficiency;Leucocyte adhesion deficiency - type 1;Leukocyte Adhesion  
 Deficiency Type 1;Leukocyte adhesion deficiency - type 1;Leukocyte adhesion  
 deficiency type 1;Leukocyte adhesion molecule deficiency - type 1;Leukocyte  
 adhesion molecule deficiency - type 1;Mo-1  
 deficiency|C0398738|||C0398738|MSH;MTH;NCI;OMIM;SNOMEDCT|||  
 LAD|LAD1|C0398738;C1416770|||C0398738|OMIM|||  
 LAD|LDA;lda|||C0226032|CHV;UWDA|||  
 LAD|LFA-1|C0079717|||C1706333|NCI|||  
 LAD|Left ant des coronary artery|||C0226032|HCPCS|||  
 LAD|Leukocyte adhesion deficiency;leukocyte adhesion  
 deficiency|C0272187|||C0272187|CHV;NCI;SNOMEDCT|1|0.0247|  
 LAD|Leukocyte adhesion deficiency - type 1 (disorder)|||C0398738|SNOMEDCT|||  
 LAD|Ramus interventricularis anterior (Arteria coronaria  
 sinistra)|||C0226032|FMA|||  
 LAD|Structure of anterior descending branch of left coronary artery (body  
 structure)|||C0226032|SNOMEDCT|||  
 LAD|lactate dehydrogenase;lactic acid  
 dehydrogenase|C0022917|||C0022917|AOD;CHV;CSP;NCI;SNOMEDCT|||1  
 LAD|language acquisition device|||1  
 LAD|left anterior descending||1|0.992||1|0.2986|1  
 LAD|left anterior descending branch|||1|0.0075|  
 LAD|left anterior descending coronary|||1|0.0081|  
 LAD|left atrial defect|||1  
 LAD|left atrial diameter|||1|0.0114|1  
 LAD|left atrial dilation||1|0.002|||1  
 LAD|left atrial dimension|||1|0.0124|1  
 LAD|left axis deviation|C0232297|||C0232297|CHV;SNOMEDCT|1|0.0075|1  
 LAD|ligament augmentation device|||1|0.0091|1  
 LAD|ligamentous anterior dislocation|||1  
 LAD|linear A disease|||1  
 LAD|linear IgA bullous dermatosis;linear IgA dermatosis;linear IgA  
 disease|C0406650|||1|0.0173|  
 LAD|linoleic acid depression|||1  
 LAD|lymphadenopathy|C0497156|1|0.006|||1  
 LAD|lymphocyte-activating determinant|C0019754;C0302291|||1  
 LA|AUTOANTIGEN La;LARP3;La RIBONUCLEOPROTEIN DOMAIN FAMILY, MEMBER 3;La  
 ribonucleoprotein domain family, member 3;SJOGREN SYNDROME ANTIGEN B;SSB  
 gene|C1420423|||C1420423|HUGO;MTH;OMIM|||  
 LA|Agglutination Test, Latex;Agglutination Tests, Latex;Latex Agglutination  
 Test;Latex Agglutination Tests;Latex agglutination test;Latex agglutination  
 test, NOS;Test, Latex Agglutination;Tests, Latex Agglutination;agglutination  
 latex tests;latex agglutination test;latex agglutination tests;Fixation Test,  
 Latex;Fixation Tests, Latex;Latex Fixation Test;Latex Fixation Tests;Test, Latex

Fixation;Tests, Latex Fixation;latex fixation test;LA - Latex  
agglutination;Latex agglutination;agglutination latex;latex agglutination;latex  
particle agglutination  
test|C0023117|||C0023117|AOD;CHV;CSP;HL7V3.0;MSH;MTH;SNOMEDCT|1|0.058|1  
LA|L-arginine|C0003765|||1|0.0044|  
LA|LA;La|||C0023034;C0023117;C0024024;C1420423|HUGO;LNC;NCI|||  
LA|LAO;Laos;laos;LAO PEOPLE'S DEMOCRATIC REPUBLIC;Lao People's Democratic  
Republic|C0023034|||C0023034|AOD;CHV;LCH;MSH;MTH;NCI;SNOMEDCT|||  
LA|Lanthanum;lanthanum|C0023031|||1|0.0153|1  
LA|Laos (geographic location)|||C0023034|SNOMEDCT|||  
LA|Laparoscopic adrenalectomy;laparoscopic  
adrenalectomy|C0521267|||C0521267|CHV;SNOMEDCT|1|0.0102|1  
LA|Latex agglutination test (procedure)|||C0023117|SNOMEDCT|||  
LA|Los Angeles|C0024015|1|0.080||1|0.0071|1  
LA|Louisiana;louisiana;Louisiana (geographic  
location)|C0024024|1|0.004|C0024024|AOD;CHV;LCH;MSH;MTH;NCI;SNOMEDCT|||  
LA|Ludwig angina|C0024081|||1|  
LA|Lyme arthritis|C0242381|||1|0.0048|  
LA|SSB|C1167121;C1420423|||C1420423|HUGO;OMIM|||  
LA|Sjogren syndrome antigen B (autoantigen La)|||C1420423|HUGO|||  
LA|alpha-lactalbumin|C0002287;C1442889|||1|0.0082|  
LA|alpha-lipoic acid|C0023791|||C0023791|CHV;MSH;NCI;NDFRT;PDQ;SNOMEDCT;VANDF|||  
LA|anti-SS-B|||1|0.0037|  
LA|antibodies|C0003241|||1|0.0031|  
LA|blood lactate|||1|0.0231|  
LA|blood lactate concentration|||1|0.0037|  
LA|labial|C0023759|||1|  
LA|lactalbumin|C0022912|||C0022912|CHV;CSP;LNC;MSH;NDFRT;SNOMEDCT|||  
LA|lactate|C0022924;C0376261|||C0022924;C0202115;C0376261|AOD;CHV;CSP;LNC;MSH;MT  
H;NCI;NDFRT;RXNORM;SNOMEDCT;VANDF|||  
LA|lactate concentration|||1|0.0153|  
LA|lactic  
acid|C0064582|||C0064582;C0202115|AOD;CHV;MSH;MTH;MTHSPL;NCI;NDFRT;RXNORM;SNOMED  
CT;VANDF|1|0.0384|1  
LA|lactic acidemia|C0347959;C1855560|||C0347959|CHV;CSP;OMIM;SNOMEDCT|||  
LA|lactic  
acidosis|C0001125|||C0001125|AOD;CHV;CSP;CST;DXP;MSH;MTHICD9;NDFRT;OMIM;SNOMEDCT  
|1|0.0034|  
LA|lactide|C0293984|||C0293984|MSH|||  
LA|lambert|C1551092|||1|  
LA|laminin|C0022984|||C0022984|AOD;CHV;CSP;FMA;MSH;MTH;NCI;NDFRT;UWDA|1|0.0037|  
LA|language age|||1|  
LA|laparoscopic|C0031150;C0393360|||1|0.0034|  
LA|laparoscopic appendectomy;laparoscopic  
appendectomy|C0372525|||C0372525|CHV;ICD9CM;NCI;SNOMEDCT|1|0.0204|1  
LA|lard|C0064658|||C0064658;C1420806|CHV;HUGO;MSH;MTH;OMIM;SNOMEDCT|||  
LA|large aggregates|||1|0.0024|  
LA|large amount|||1|  
LA|large aspiny|||1|0.0031|  
LA|large surfactant aggregates|||1|0.0024|  
LA|laser ablation|C0348007|||C0348007|CHV;MSH;MTH;SNOMEDCT|1|0.0041|  
LA|laser angioplasty|C0078950|||C0078950|CHV;CSP;MSH|||1|  
LA|late abortion|C0948496|||C0948496|CHV|||1|  
LA|late antigen|||1|0.0048|1  
LA|lateral|C0205093|||C0205093|CHV;FMA;HL7V2.5;LNC;MTH;NCI;SNOMEDCT;UWDA|1|0.006  
5|  
LA|lateral amygdala|||1|0.0109|

LA|lateral apical|||||||1  
LA|lateral nucleus|||||1|0.0027|  
LA|lateral nucleus of the amygdala|||||1|0.0099|  
LA|lauric acid|C0023139|||C0023139|AOD;CHV;LCH;MSH;NCI;SNOMEDCT|||  
LA|lead acetate|C0064711|||C0064711|CHV;MSH;NDFRT;SNOMEDCT;VANDF|||  
LA|left angle|||||||1  
LA|left angulation|||||||1  
LA|left  
arm|C0230347;C1268256|||C0230347;C1268256|CHV;FMA;HL7V2.5;SNOMEDCT;UWDA|||1  
LA|left atria;left  
atrium|C0225860;C1269894|||C0225860;C1269894|AOD;CHV;FMA;MSH;NCI;SNOMEDCT;UWDA|1  
|0.0805|1  
LA|left atrial||1|0.060||1|0.1647|1  
LA|left auricle|C0225861|||C0225861|CHV;FMA;UWDA|||1  
LA|leucine  
aminopeptidase|C0023402|||C0023402;C0202118|CHV;LCH;MSH;MTH;NDFRT;SNOMEDCT|||1  
LA|leucoagglutinin;leukoagglutinin|C0312638|||C0312638|SNOMEDCT|1|0.0088|  
LA|leukemia antigen|||||||1  
LA|leukoagglutinating|||||||1  
LA|leukoaraiosis|C0521167;C0948163|||C0948163|MSH;NDFRT|1|0.0082|1  
LA|leuprolide  
acetate|C0700596|||C0700596|CHV;MSH;MTH;MTHSPL;NCI;NDFRT;PDQ;RXNORM;SNOMEDCT;USP  
MG;VANDF|1|0.0289|  
LA|levator  
ani|C0224384;C1305037|||C0224384;C1305037|CHV;FMA;NCI;SNOMEDCT;UWDA|||1  
LA|levulinic acid|C0023591|||C0023591|AOD;MSH;RXNORM;SNOMEDCT|||  
LA|lichen amyloidosis;lichen amyloidosis|C0268397|||C0268397|CHV|||1  
LA|light adaptation|C0237452|||||||1  
LA|linguoaxial|||||||1  
LA|linoleate|C0125894;C0220871|||C0125894;C0220871|CSP;LNC;MSH;MTH;RXNORM|||  
LA|linoleic|||||1|0.0115|  
LA|linoleic  
acid|C0023749|||C0023749|AOD;CHV;MSH;NCI;NDFRT;RXNORM;SNOMEDCT;VANDF|1|0.1345|1  
LA|lipoatrophy|C0023787;C1280433|||C0023787;C1280433|CHV;CSP;DXP;MTH;SNOMEDCT|||  
LA|lithocholic acid|C0023875|||C0023875|MSH;NDFRT;SNOMEDCT|||  
LA|lobuloalveolar|||||||1  
LA|local anaesthesia;local  
anesthesia|C0002921;C2930407|||C0002921;C2930407|AOD;CHV;CSP;LCH;MSH;MTH;NCI;NDF  
RT;SNOMEDCT|1|0.0292|1  
LA|local anaesthetic;local  
anesthetic|C0002921;C0002934|||C0002921;C0002934|CHV;CSP;NDFRT;SNOMEDCT|1|0.0343  
|1  
LA|localized adherence|||||1|0.0115|  
LA|locomotor activity|C0026606|||C0026606|MSH|1|0.0149|  
LA|long arm|C0575519|||||||1  
LA|long axis|C0522487|||C0522487|LNC;NCI;SNOMEDCT|||  
LA|long-acting||1|0.852||1|0.0034|1  
LA|loss of attachment|||||1|0.0041|  
LA|low affinity|||||1|0.0027|  
LA|low altitude|C0238618|||C0238618|SNOMEDCT|1|0.0031|  
LA|low anxiety|||||||1  
LA|low-average|||||1|0.0031|  
LA|lumen area|||||1|0.0092|  
LA|lupus  
anticoagulant|C0085240;C0311370|||C0085240|CHV;LNC;MSH;NDFRT;SNOMEDCT|1|0.1692|1  
LA|lymphadenectomy|C0024203|||C0024203|AOD;CHV;CSP;MSH;NCI;PDQ;SNOMEDCT|1|0.0034  
|

LA|lymphocyte antibody|C0003369|||||1  
 LA|lymphoid aggregates|||||1|0.002|  
 LDH|(S)-Lactate:NAD+ oxidoreductase||||C0022917|MSH;NDFRT|||  
 LDH|Dehydrogenase, L-Lactate;L Lactate Dehydrogenase;L lactate dehydrogenase;L-  
 (+)-Lactate Dehydrogenase;L-Lactate Dehydrogenase;L-Lactate  
 dehydrogenase;LACTATE DEHYDROGENASE L;l-lactate dehydrogenase;L-Lactic Acid  
 Dehydrogenase;LD - Lactate dehydrogenase;LDH;LDH - Lactate dehydrogenase;Lactic  
 Acid Dehydrogenase;Lactic acid dehydrogenase;lactic acid dehydrogenase;NAD-  
 Lactate  
 Dehydrogenase|C0022917|||C0022917;C0202113;C0851148|AOD;CHV;CSP;MSH;NCI;NDFRT;SN  
 OMEDCT|||  
 LDH|Dehydrogenase, Lactate;Lactate Dehydrogenase;Lactate  
 dehydrogenase;dehydrogenase lactate;lactate dehydrogenase;lactate  
 dehydrogenases|C0022917;C1260230|1|1|C0022917;C0202113|AOD;CHV;CSP;LCH;LNC;MSH;M  
 TH;NCI;NDFRT;SNOMEDCT|1|0.9584|1  
 LDH|EC 1.1.1.27||||C0022917|NCI|||  
 LDH|L-Lactate Dehydrogenase [Chemical/Ingredient]||||C0022917|NDFRT|||  
 LDH|L-Lactate dehydrogenase (substance)||||C0022917|SNOMEDCT|||  
 LDH|LD measurement;LDH measurement;ldh measurement;Lactate Dehydrogenase  
 Measurement;Lactate dehydrogenase measurement;Lactate dehydrogenase level;Lactic  
 acid dehydrogenase measurement;lactate dehydrogenase level  
 test|C0202113|||C0202113|CHV;MTH;NCI;SNOMEDCT|||  
 LDH|Lactate dehydrogenase (substance)||||C0022917|SNOMEDCT|||  
 LDH|Lactate dehydrogenase measurement (procedure)||||C0202113|SNOMEDCT|||  
 LDH|Lactatedehydrogenase|||||1|0.0037|  
 LDH|Lifetime Drinking History;lifetime drinking  
 history|C0851148|||C0851148|AOD;CHV;MTH|||  
 LDH|Serum lactic dehydrogenase|C1278052|||||1|0.0209|  
 LDH|dehydrogenase level|||||1|0.0019|  
 LDH|lactate dehydrogenase activity|C1151154|||||1|0.0054|  
 LDH|lactate dehydrogenase release|||||1|0.0029|  
 LDH|layered double hydroxide|||||1|0.0021|  
 LDH|low-dose heparin|||||1|0.0019|1  
 LDH|lumbar disc herniation|C0281899|||||1|0.0029|  
 LDL|Beta-lipoprotein;Lipoprotein.beta;beta Lipoprotein;beta Lipoproteins;beta  
 lipoprotein;beta lipoproteins;beta-Lipoproteins;LDL - Low density  
 lipoprotein;low density lipoprotein (LDL);LDL Lipoproteins;Lipoproteins, LDL;LOW  
 DENSITY LIPOPROTEIN;Lipoproteins, Low-Density;Low Density Lipoprotein;Low  
 Density Lipoproteins;Low density lipoprotein;Low-Density Lipoproteins;low  
 density lipoprotein;low density lipoproteins;low-density lipoprotein;low-density  
 lipoproteins|C0023823|1|1|C0023823;C1325353|AOD;CHV;CSP;CST;FMA;GO;LNC;MSH;MTH;N  
 CI;NDFRT;SNOMEDCT;UWDA|1|0.9883|1  
 LDL|LDL;ldls|C0023823;C0428474|||C0023823;C0428474;C1325353|AOD;CHV;CSP;FMA;GO;M  
 EDLINEPLUS;NCI;SNOMEDCT;UWDA|||  
 LDL|LDL Cholesterol|C0023824;C0428474|||C0428474|NCI|||  
 LDL|Lipoproteins, LDL [Chemical/Ingredient]||||C0023823|NDFRT|||  
 LDL|Low density lipoprotein (substance)||||C0023823|SNOMEDCT|||  
 LDL|Serum LDL Cholesterol;Serum LDL Cholesterol Measurement;Serum LDL  
 cholesterol measurement;Serum LDL cholesterol  
 level|C0428474|||C0428474|MTH;NCI;SNOMEDCT|||  
 LDL|Serum LDL cholesterol level (procedure)||||C0428474|SNOMEDCT|||  
 LDL|Serum LDL cholesterol measurement (procedure)||||C0428474|SNOMEDCT|||  
 LDL|limitation of daily life|||||1  
 LDL|loudness discomfort level|||||1|0.0021|1  
 LDL|low-density lipoprotein activity|C1325353|||C1325353|MTH|||  
 LDL|low-density lipoprotein cholesterol|C0023824|||||1|0.0097|  
 LDL|low-density lymphocyte|||||1

LD|DIAG LABORATORY;LABORATORY DIAG||||C0011911|MSH|||  
 LD|DKFZP686C2281;FLJ45135;FMN1;FMN1  
 gene;FORMIN;MGC125288;MGC125289|C1539521|||C1539521|HUGO;MTH;OMIM|||  
 LD|Diagnoses, Laboratory;Laboratory Diagnoses;Diagnosis, Laboratory;Laboratory  
 Diagnosis;Laboratory diagnosis;laboratory  
 diagnosis|C0011911|||C0011911|CHV;LCH;MSH;MTH;SNOMEDCT|||  
 LD|Disequilibrium, Linkage;Disequilibriums, Linkage;Linkage  
 Disequilibrium;Linkage Disequilibriums;linkage  
 disequilibrium|C0023746|||C0023746|CHV;CSP;MSH;MTH;NCI|1|0.2263|  
 LD|EPM2A|C0751783;C1414435|||C1414435|HUGO;OMIM|||  
 LD|EPM2A GENE;EPM2A gene;LAFORIN;LDE|C1414435|||C1414435|HUGO;LNC;MTH;OMIM|||  
 LD|FKHL14;MFH-1;MFH1|C1414669;C1705360|||C1705360|NCI|||  
 LD|FMN|C0016388;C1539521|||C1539521|OMIM|||  
 LD|FORMIN 1;formin 1;limb deformity  
 protein|C0125393;C1539521|||C1539521|HUGO;OMIM|||  
 LD|FOXC2 wt Allele;Forkhead Box C2 wt Allele;Mesenchyme Forkhead  
 Gene|C1705360|||C1705360|MTH;NCI|||  
 LD|L-  
 dopa;levodopa|C0023570|||C0023570|AOD;CHV;CSP;LNC;MSH;MTHSPL;NCI;NDFRT;PDQ;RXNOR  
 M;SNOMEDCT;USPMG;VANDF|1|0.0314|1  
 LD|LD|C0023746;C1705360|||C0011911;C0023746;C0228342;C1414435;C1539521;C1705360|  
 FMA;HUGO;NCI;OMIM;SNOMEDCT|||  
 LD|LIMB DEFORMITY, MOUSE, HOMOLOG OF|||C1539521|OMIM|||  
 LD|Laboratory diagnosis (contextual qualifier)|||C0011911|SNOMEDCT|||  
 LD|Laboratory diagnosis (contextual qualifier) (qualifier  
 value)|||C0011911|SNOMEDCT|||  
 LD|Lateral Dorsal Nucleus;Lateral dorsal nucleus;Nucleus, Lateral Dorsal;Lateral  
 Dorsal Thalamic Nucleus;Lateral dorsal thalamic nucleus;Laterodorsal Thalamic  
 Nucleus;Laterodorsal thalamic nucleus;Nucleus, Laterodorsal Thalamic;Thalamic  
 Nucleus, Laterodorsal;Laterodorsal nucleus, superficial part;Nucleus dorsalis  
 lateralis thalami;Nucleus lateralis dorsalis of thalamus;Nucleus lateralis  
 dorsalis thalami;Nucleus lateralis thalami dorsalis;Structure of lateral dorsal  
 nucleus of thalamus;lateral dorsal nucleus  
 (LDN)|C0228342|||C0228342|CHV;FMA;MSH;MTH;SNOMEDCT|||  
 LD|Lateral dorsal nucleus of thalamus;Nucleus lateralis  
 dorsalis|C0228342;C1761577|||C0228342|FMA;SNOMEDCT|||  
 LD|Lateral dorsal nucleus of thalamus (body structure)|||C0228342|SNOMEDCT|||  
 LD|Learning disabilities;learning disabilities;learning  
 disability|C0751265;C1321592|1|0.008|C0751265;C1321592|CHV;CSP;LCH;MEDLINEPLUS;M  
 SH;MTH;OMIM;SNOMEDCT|1|0.114|1  
 LD|Legionnaires' disease|C0023241|||1|0.0284|1  
 LD|Leishman-Donovan|||1|1  
 LD|Leishmania donovani|C0023273|||1|0.0038|  
 LD|Lepidoglyphus destructor|C0446326|||1|0.0038|  
 LD|Lombard-Dowell|||1|1  
 LD|Longissimus dorsi|||1|0.0129|  
 LD|Lyme disease|C0024198|||1|0.0351|  
 LD|Nucleus dorsalis superficialis (Hassler)|||C0228342|FMA|||  
 LD|Nucleus lateralis dorsalis (body structure)|||C0228342|SNOMEDCT|||  
 LD|Structure of lateral dorsal nucleus of thalamus (body  
 structure)|||C0228342|SNOMEDCT|||  
 LD|epilepsy, progressive myoclonus type 2A, Lafora disease  
 (laforin)|||C1414435|HUGO|||  
 LD|labor and delivery|||1|1  
 LD|laboratory data|C1705214|||1|1  
 LD|labyrinthine defect|||1|1

LD|lactate  
dehydrogenase|C0022917|1|0.966|C0022917;C0202113|CHV;CSP;LCH;LNC;MSH;MTH;NCI;NDF  
RT;SNOMEDCT|1|0.101|1  
LD|lamina  
densa|C0085872;C1167354;C1235665|||C0085872;C1167354;C1235665|FMA;GO;MTH;NCI;UWD  
A|1|0.0071|  
LD|laser Doppler|C0430489|||1|0.0305|1  
LD|last dose|||1  
LD|lateral dorsal|||1|0.0046|  
LD|laterodorsal|||1|0.0042|  
LD|latissimus  
dorsi|C0224362;C1305028|||C0224362;C1305028|CHV;FMA;SNOMEDCT;UWDA|1|0.0388|1  
LD|latissimus dorsi muscle|C0224362|||1|0.0046|  
LD|learning disabled|||1|0.0309|1  
LD|learning disorder|C0023186|||C0023186|CHV;CSP;MSH;NCI;SNOMEDCT|||1  
LD|left deltoid|C0694649|||1  
LD|lesion depth|||1|0.0063|  
LD|lethal dose|C1443964|||C1443964|SNOMEDCT|1|0.005|1  
LD|leukodystrophy|C0023520|||1  
LD|lichenoid dysplasia|||1  
LD|lidocaine|C0023660|||C0023660|AOD;CHV;CSP;LNC;MSH;MTH;MTHFDA;MTHSPL;NCI;NDFRT  
;PDQ;RXNORM;SNOMEDCT;USPMG;VANDF|1|0.0046|  
LD|light|C0023693;C1306462;C1881376|||1|0.0559|  
LD|light difference|||1  
LD|light differentiation|||1  
LD|light duty|||1  
LD|light-dark|||1  
LD|light-dark cycle|C2718082|||C2718082|MSH|1|0.0205|  
LD|limb deformity|C0239337|||1|0.0092|  
LD|limit of detection|C2718050|||C2718050|MSH|1|0.0046|  
LD|limited|C0439801|||C0439801|CHV;LNC;SNOMEDCT|1|0.0042|  
LD|limited disease|||1  
LD|limiting dilution|||1|0.018|  
LD|linear dichroism|||1|0.0263|1  
LD|linguodistal|||1  
LD|lipoatrophic  
diabetes|C0011859;C0221032;C1720860|||C0011859;C0221032;C1720860|CHV;MSH;OMIM;SN  
OMEDCT|||  
LD|lipodystrophy|C0023787|||C0023787|AOD;CHV;COSTAR;CSP;CST;ICD9CM;MSH;MTH;NDFRT  
;OMIM;SNOMEDCT|1|0.0142|1  
LD|lithium diluent|||1  
LD|lithium discontinuation|||1  
LD|liver disease|C0023895|||C0023895|CCS;CHV;COSTAR;DXP;MSH;NCI;SNOMEDCT|||1  
LD|living donor|C0348050|1|0.002|C0348050|CHV;MSH|1|0.0146|1  
LD|loading dose||1|0.002||1|0.0084|1  
LD|local deviation|||1  
LD|long days|||1|0.0367|  
LD|long dialysis|||1  
LD|long dwell|||1  
LD|longissimus|C0224306;C0448358|||1|0.0042|  
LD|longissimus muscle|C0224306|||1|0.0025|  
LD|longitudinal diameter|||1  
LD|low density|||1|0.0125|1  
LD|low dose;low-  
dose|C0445550;C1708745|||C0445550;C1708745|CHV;LNC;NCI;SNOMEDCT|1|0.0259|1  
LD|lumen diameter|||1|0.005|  
LD|luminance-defined|||1|0.0038|

LD|lung destruction|||||1  
 LD|lymphocyte defined|||||1  
 LD|lymphocyte depletion|C0024257|||C0024257|CHV;MSH;SNOMEDCT|||1  
 LD|lymphocytic depletion|||||1|0.0042|  
 LD|lymphocytically determined|||||1  
 LD|nucleus|C0007610|||||1|0.0042|  
 LD|patients with limited disease|||||1|0.0163|  
 LD|photoperiod|C0162811|||||1|0.0038|  
 LD|under light-dark|||||1|0.0121|  
 LEEP|LEEP;leep;Loop Electrosurgical Excision Procedure;Loop electrosurgical excision procedure;Loop electrosurgical excision procedure, NOS;loop electrosurgical excision procedure;loop electrosurgical excision procedure (LEEP);loop excision|C0184930|1|1|C0184930|CHV;MTHICD9;NCI;SNOMEDCT|1|1|1  
 LEEP|Loop Electrosurgical Excision|||C0184930|NCI|||  
 LEEP|Loop electrosurgical excision procedure (procedure)|||C0184930|SNOMEDCT|||  
 LEEP|left end-expiratory pressure|||||1  
 LE|<=|||C0439090|SNOMEDCT|||  
 LE|<= (qualifier value)|C1285164|||C0439090|SNOMEDCT|||  
 LE|Antigen, Le;Antigens, Le;Le Antigen;Le Antigens;BLOOD GROUP--LEWIS SYSTEM;Blood-Group System, Lewis;Lewis Blood Group System;Lewis Blood-Group System;Lewis blood group system;System, Lewis Blood-Group;ISBT system 007;ISBT system LE;L little e NOS Ag;Le NOS AG;Le not otherwise specified AG;Le not otherwise specified Antigen;Lewis System;Lewis system;System, Lewis;Lewis group|C0023595|||C0023595|LCH;LNC;MSH;MTH;NDFRT;OMIM;SNOMEDCT|||  
 LE|HPS4;HPS4 GENE;HPS4 gene;Hermansky-Pudlak syndrome 4;KIAA1667|C1423767|||C1423767|HUGO;MTH;OMIM|||  
 LE|HuIFN-alpha|||||1|0.0096|  
 LE|LB|||C0023190|NCI|||  
 LE|LBN|C0023190;C1426383|||C0023190|NCI|||  
 LE|LE;Le|C0439090;C1423767|||C0023190;C0023595;C0439090;C1423767|HUGO;NCI;OMIM|||  
 |  
 LE|LEBANON;Lebanon;lebanon|C0023190|||C0023190|AOD;CHV;CSP;LCH;MSH;MTH;NCI;SNOME DCT|||  
 LE|Lateral epicondylitis|C0039516|||||1|0.0096|  
 LE|Le(a) Blood Group System|||C0023595|MSH;NDFRT|||  
 LE|Lebanon (geographic location)|||C0023190|SNOMEDCT|||  
 LE|Leonard|||||1  
 LE|Less Than or Equal To;Less Than or Equal to;Less than or equal|C0439090|||C0439090|HL7V2.5;HL7V3.0;MTH;NCI|||  
 LE|Less-than-or-equal symbol <=|||C0439090|SNOMEDCT|||  
 LE|Less-than-or-equal symbol <= (qualifier value)|||C0439090|SNOMEDCT|||  
 LE|Lesser Than or Equal To|||C0439090|NCI|||  
 LE|Leu-enkephalin|C0014294;C1418447|||||1|0.0139|  
 LE|Leukocyte elastase;leukocyte elastase|C0064833;C1414369|||C0064833;C1414369|CSP;HUGO;MSH;MTH;NDFRT;SNOMEDCT|1|0.0193|  
 LE|Lewis|||||1|0.0622|1  
 LE|Lewis Blood-Group System [Chemical/Ingredient]|||C0023595|NDFRT|||  
 LE|Lewis blood group system (qualifier value)|||C0023595|SNOMEDCT|||  
 LE|Long Evans;Long-Evans|C2697858|||||1|0.2283|1  
 LE|Long-Evans rats|C0324537|||||1|0.0193|  
 LE|Loteprednol etabonate|C0126177|||||1|0.0161|  
 LE|labelling efficiency|||||1|0.0075|  
 LE|labor epidural|||||1  
 LE|law enforcement|C0162469|||C0162469|AOD;CHV;MSH|||

LE|left  
 ear|C0229299;C1289055|||C0229299;C1289055|CHV;FMA;HL7V2.5;NCI;SNOMEDCT;UWDA|1|0.0064|1  
 LE|left eye|C0229090|||C0229090|CHV;FMA;HL7V2.5;SNOMEDCT;UWDA|1|0.0129|1  
 LE|leg exercise|C0454361|||1|0.0075|  
 LE|leg extension|||1|0.0075|  
 LE|lens epithelial|||1|0.0064|  
 LE|lens extraction|C0197689;C0197717|||1|  
 LE|leucine enkephalin|C0014294|||1|0.0182|1  
 LE|leukocyte esterase|C0125619;C0427760|1|0.690||1|0.03|1  
 LE|leukoerythrogenic|||1|  
 LE|life events|C0557155|||1|0.0107|  
 LE|life expectancy|C0023671|||C0023671|AOD;CHV;CSP;LCH;LNC;MSH|1|0.0332|  
 LE|liquid-expanded|||1|0.0107|  
 LE|live embryo|||1|  
 LE|liver extract|C0023899|||1|0.0107|  
 LE|local excision|C0278259|||1|0.0193|1  
 LE|low-energy|||1|0.0225|  
 LE|lower  
 extremity|C0023216|1|0.268|C0023216|AOD;CHV;CST;FMA;LNC;MSH;MTH;NCI;SNOMEDCT;UWD  
 A|1|0.0364|1  
 LE|luminal epithelial|||1|0.0064|  
 LE|luminal epithelium|||1|0.0332|  
 LE|lupus  
 erythematosus|C0409974|1|0.006|C0409974|CHV;ICD9CM;LCH;LNC;MTH;NCI;SNOMEDCT|1|0.329|1  
 LE|lymphedema|C0024236|1|0.006||1|0.0129|  
 LE|sinemet-levodopa||1|0.002|||  
 LFT|Function Test, Liver;Function Tests, Liver;Liver Function Test;Liver  
 Function Tests;Liver function test;Liver function tests;Liver function tests  
 NOS;Test, Liver Function;Tests, Liver Function;liver function test;liver  
 function tests;test liver function;LFT;LFT's;LFT - Liver function test;Liver  
 Study;liver studies;liver study;Liver funct. test -gen.;liver panel;liver  
 panels;liver test;liver testing;liver  
 tests|C0023901|1|1|C0023901|AOD;CHV;LCH;MSH;MTH;MTHMST;NCI;SNOMEDCT|1|1|1  
 LFT|Hepatic function panel;function hepatic panel;hepatic function  
 panel|C0023901;C0812554|||C0023901|CHV;SNOMEDCT|||  
 LFT|Hepatic function panel (procedure)|||C0023901|SNOMEDCT|||  
 LFT|Liver function tests (& [general]);Liver function tests (& general);Liver  
 function tests - general|||C0023901|SNOMEDCT|||  
 LFT|Liver function tests (& [general]) (procedure);Liver function tests (&  
 general) (procedure);Liver function tests - general  
 (procedure)|||C0023901|SNOMEDCT|||  
 LFT|Liver function tests (procedure);Liver function tests NOS  
 (procedure)|||C0023901|SNOMEDCT|||  
 LFT|lateral femoral torsion|||1|  
 LFT|latex fixation test|C0023117|||1|  
 LFT|latex flocculation test|||1|  
 LFT|left front transverse|||1|  
 LFT|localized fibrous tumor|C1266119|||1|  
 LFT|low flap transverse|||1|  
 LFT|low-frequency tetanic|||1|  
 LFT|low-frequency transduction|||1|  
 LFT|low-frequency transfer|||1|  
 LFT|lung function test|C0024119|||C0024119|AIR;CHV;MSH;NCI||1|  
 LIMA|Lima;lima|C1047251|||C1047251|CHV;NCBI|||  
 LIMA|large intestinal mucin antigen|||1|0.0263|

LIMA|left internal mammary artery|C0447054|1|1.000|||1|0.9737|1

LMP|Date last menstrual period;Date of last menstrual period;date of last menstrual period|C0425932;C0488490|||C0425932|CHV;LNC;MTH;SNOMEDCT|||

LMP|Date of last menstrual period (observable entity)|||C0425932|SNOMEDCT|||

LMP|LMP;lmp;LMP - Last menstrual period;Last Menstrual Period;Last menstrual period;last menstrual period|C0425932|1|1|C0425932|CHV;LNC;NCI;SNOMEDCT|1|0.2586|1

LMP|latent membrane protein|||1|0.4116|1

LMP|left mentum posterior|||1|1|

LMP|low malignant potential|||1|0.3113|1

LMP|low molecular mass polypeptide|||1|0.0185|

LMP|lumbar puncture|C0037943;C0553794;C1548878|||1|

LP|LIVER PANCREAS ANTIGEN;O-PHOSPHOSERINE tRNA-SELENOCYSTEINE tRNA SYNTHASE;SEPSECS;SEPSECS gene|C2239920|||C2239920|HUGO;MTH;OMIM|||

LP|LP|C0037943;C0228341;C2239920|||C0037943;C0228341;C2239920|FMA;NCI;OMIM|||

LP|LP - Lumbar puncture|C0037943|||C0037943|SNOMEDCT|||

LP|Lateral Posterior Nucleus;Lateral posterior nucleus;Nucleus, Lateral Posterior;lateral posterior nucleus;Lateral Posterior Thalamic Nucleus;Lateral posterior thalamic nucleus;Laterodorsal nucleus, caudal part;Nucleus lateralis posterior thalami;Nucleus lateralis thalami posterior;Structure of lateral posterior nucleus of thalamus|C0228341|||C0228341|FMA;MSH;SNOMEDCT|1|0.016|

LP|Lateral Posterior Nucleus of the Thalamus;Lateral posterior nucleus of thalamus;Posterior lateral nucleus of thalamus|C0228341;C1761578|||C0228341|FMA;MTH;NCI;SNOMEDCT|||

LP|Lateral posterior nucleus of thalamus (body structure)|||C0228341|SNOMEDCT|||

LP|Legionella pneumophila|C0023238|||1|0.0124|1

LP|Lipiodol|C0947677|||1|0.0062|

LP|Lumbar Puncture;Lumbar Punctures;Lumbar puncture;Lumbar puncture, NOS;Puncture, Lumbar;Punctures, Lumbar;lumbar puncture;lumbar punctures|C0037943;C0553794;C1548878|1|0.978|C0037943;C0553794;C1548878|AOD;CHV;CSP;HL7V2.5;MSH;NCI;SNOMEDCT|1|0.0741|1

LP|Lumbar puncture (procedure)|||C0037943|SNOMEDCT|||

LP|Lumboperitoneal;lumboperitoneal|||1|0.0108|1

LP|Lymphocyte proliferation;lymphocyte proliferation|C0596873|||C0596873|CHV;CSP;GO;LNC|1|0.017|

LP|Nucleus dorsocaudalis (Hassler)|||C0228341|FMA|||

LP|Nucleus lateralis posterior;nucleus lateralis posterior|||C0228341|FMA;SNOMEDCT|1|0.0067|

LP|Nucleus lateralis posterior (body structure)|||C0228341|SNOMEDCT|||

LP|Puncture, Spinal;Punctures, Spinal;Spinal Puncture;Spinal Punctures;Spinal puncture;spinal puncture;Rachicentesis;Spinal Tap;Spinal Taps;Spinal tap;Tap, Spinal;Taps, Spinal;spinal tap;spinal tapping;spinal taps|C0037943;C0553794|||C0037943|AOD;CHV;CSP;MSH;MTH;NCI;SNOMEDCT|||

LP|SLA|C1420083;C2239920|||C2239920|HUGO;OMIM|||

LP|SLA/LP|||C2239920|HUGO|||

LP|SOLUBLE LIVER ANTIGEN|C0142996;C2239920|||C2239920|OMIM|||

LP|Sep (O-phosphoserine) tRNA:Sec (selenocysteine) tRNA synthase|||C2239920|HUGO|||

LP|Spinal puncture and aspiration|||C0037943|SNOMEDCT|||

LP|Spinal tap (procedure)|||C0037943|SNOMEDCT|||

LP|Spinal tap (procedure) [Ambiguous]|||C0037943|SNOMEDCT|||

LP|Structure of lateral posterior nucleus of thalamus (body structure)|||C0228341|SNOMEDCT|||

LP|coefficient|C1707429|||1|0.0072|

LP|diagnostic spinal tap|||C0037943|CHV|||

LP|hydraulic conductance|||1|0.0118|

LP|hydraulic conductivity|1|0.0726|  
LP|hydraulic permeability|1|0.0149|  
LP|insulin lispro;lispro|C0293359||C0293359|CHV;MSH;NDFRT|1|0.0051|  
LP|labile peptide|1|  
LP|labile protein|1|  
LP|laboratory procedure|C0022885|1|  
LP|lactic peroxidase|1|  
LP|lactoperoxidase|C0022948;C1416903||C0022948;C1416903|CHV;CSP;HUGO;MSH;MTH;NDFRT;OMIM|1|0.0154|  
LP|lamina propria|C1179187||C1179187|CHV;FMA;MSH;NCI;UWDA|1|0.0715|1|  
LP|large-plaque|1|0.0098|  
LP|laryngopharyngeal|C0023079|1|  
LP|late potentials|1|0.0592|  
LP|late proximal|1|0.0051|  
LP|latency period|C0023103|1|0.0036|1|  
LP|latent period|1|0.0072|1|  
LP|lateral plantar|1|  
LP|lateral posterior|1|0.0108|  
LP|lateral prostate|1|0.0077|  
LP|lateral pyloric|1|0.0237|  
LP|lateral pylorus|1|  
LP|lateralis posterior|1|  
LP|lateroposterior thalamic nucleus|1|0.0026|  
LP|latex particle|C0524643|1|  
LP|leading pole|1|  
LP|leg press|1|0.0057|  
LP|legionella pneumonia|C0023241|1|0.0026|  
LP|leukapheresis|C0023416||C0023416|AOD;CHV;CSP;LCH;MSH;NCI;PDQ|1|0.0046|  
LP|leukapheresis products|1|0.0057|  
LP|leukocyte poor|1|  
LP|leukocytic pyrogen|1|0.0196|1|  
LP|levator palati|C0448313|1|  
LP|levator palpebrae|1|  
LP|licensed practitioner|1|0.018|1|  
LP|lichen  
planus|C0023646||C0023646|AOD;CHV;COSTAR;CSP;DXP;ICD9CM;LCH;MSH;MTH;NCI;NDFRT;SNOMEDCT|1|0.1009|1|  
LP|ligamentum patellae|C0206332;C1305920|1|  
LP|light peak|1|0.0046|  
LP|light perception|1|0.0077|1|  
LP|lightly padded|1|  
LP|linear prediction|1|0.0057|1|  
LP|linear programming|C0033349|1|0.0087|1|  
LP|lingua plicata|C0040412|1|  
LP|linguopulpal|1|  
LP|link protein|C0065011||C0065011|CHV;CSP;MSH;MTH|1|0.0144|  
LP|lipid panel|C0200382|1|  
LP|lipid peroxidation|C0023775||C0023775|CHV;MSH;NCI;SNOMEDCT|1|0.1338|  
LP|lipid peroxide;lipid peroxides|C0023776||C0023776|CHV;CSP|1|0.019|  
LP|lipophorin|C0065050;C1153627|1|0.0057|  
LP|lipoprotein;lipoproteins|C0023820||C0023820|CHV;FMA;LNC;MSH;NCI;NDFRT;SNOMEDCT;UWDA|1|0.0345|1|  
LP|lipoprotein particles|1|0.0026|  
LP|liver plasma|1|  
LP|liver-pancreas|C1442317|1|  
LP|long photoperiod|1|0.0082|  
LP|loop-tail|1|0.0154|

LP|lost privileges|1  
LP|low passage|1|0.0026|  
LP|low potency|1  
LP|low power|1  
LP|low pressure;low-pressure|1|0.0046|1  
LP|low protein;low-  
protein|C0242972;C0748025||C0242972;C0748025|CHV;HL7V3.0|1|0.0412|1  
LP|low protein diet;low-protein diet|C0242972||C0242972|CHV;MSH|1|0.0036|  
LP|lung parenchyma|C0819757;C1279455|1  
LP|lung perfusion|1  
LP|luteal phase|C0024153||C0024153|CHV;CSP;GO;LCH;MSH;MTH|1|0.0108|  
LP|lymphocyte predominance|1|0.0098|  
LP|lymphocyte predominant|1|0.0072|1  
LP|lymphocyte proliferative|1|0.0031|  
LP|lymphocytic predominance|1|0.0057|  
LP|lymphoid plasma|1  
LP|lymphoid predominance|1  
LP|lymphomatoid  
papulosis|C0206182||C0206182|CHV;MSH;MTH;NCI;NDFRT;SNOMEDCT|1|0.0082|1  
LP|lymphomatous polyposis|1  
LP|lymphoproliferation|1|0.0046|  
LP|lymphoproliferative|1|0.0103|  
LP|lysylpyridinoline|C0057455||C0057455|MSH||  
LP|serum lipoprotein|1|0.0067|  
LP|soluble liver antigen/liver pancreas antigen|||C2239920|HUGO||  
LP|water permeability|1|0.0108|  
LVAD|left ventricular assist  
device|C0181598|1|1.000|C0181598|CHV;NCI;SNOMEDCT|1|1|1  
LVEF|left ventricular ejection  
fraction|C0428772;C0488728|1|1.000|C0428772;C0488728|LNC;MTH;SNOMEDCT|1|0.9964|1  
LVEF|left ventricular function|C0080310|||1|0.0036|  
LVH|Hypertrophies, Left Ventricular;Hypertrophy, Left Ventricular;LEFT  
VENTRICULAR HYPERTROPHY;Left Ventricular Hypertrophies;Left Ventricular  
Hypertrophy;Left ventricular hypertrophy;VENTRICULAR HYPERTROPHY,  
LEFT;Ventricular Hypertrophies, Left;Ventricular Hypertrophy, Left;Ventricular  
hypertrophy (& [left]);hypertrophy left ventricular;left ventricular  
hypertrophy|C0149721;C0232306|1|0.994|C0149721;C0232306|CHV;COSTAR;DXP;MSH;MTH;N  
CI;NDFRT;OMIM;SNOMEDCT|1|1|1  
LVH|Hypertrophy, Left Ventricular [Disease/Finding]|||C0149721|NDFRT||  
LVH|LV hypertrophy;lv hypertrophy;LV+ - Left ventricular hypertrophy;LVH;lvh;LVH  
- Left ventricular hypertrophy;left ventricular  
enlargement|C0149721||C0149721|CHV;DXP;SNOMEDCT||  
LVH|Left ventricular hypertrophy (disorder);Ventricular hypertrophy (& [left])  
(disorder)|||C0149721|SNOMEDCT||  
LVH|large vessel hematocrit|1  
LV|5-fluorouracil (5-FU)/leucovorin|||1|0.0013|  
LV|CF|||C0731033|PDQ||  
LV|CFR|C0731033;C1305363;C1515366||C0731033|PDQ||  
LV|Calcium (6S)-Folinate|||C0731033|NCI;PDQ||  
LV|Calcium Folate;Calcium folinate;Folate Calcium;Folate, Calcium;calcium  
folinate;folinate calcium;Calcium Leucovorin;Calcium leucovorin;LEUCOVORIN  
CALCIUM;Leucovorin Calcium;Leucovorin calcium;Leucovorin, Calcium;calcium  
leucovorin;leucovorin calcium;Calcium leucovorin preparation;Leucovorin calcium  
preparation;Citrovorum factor preparation;Folinic Acid Calcium Salt  
Pentahydrate;L-CF;Levofolate  
calcium|C0731033||C0731033|CHV;MSH;MTH;MTHSPL;NCI;NDFRT;PDQ;RXNORM;SNOMEDCT;USP  
MG;VANDF||

LV|Calcium leucovorin (substance)|||C0731033|SNOMEDCT|||  
LV|Calcium leucovorin preparation (product)|||C0731033|SNOMEDCT|||  
LV|Calcium leucovorin preparation (substance)|||C0731033|SNOMEDCT|||  
LV|Citrovorum Factor;Citrovorum factor;Factor, Citrovorum;citrovorum factor|C0023413;C0731033|||C0731033|CHV;MSH;NCI;NDFRT;PDQ;SNOMEDCT|||  
LV|Citrovorum Factor [Chemical/Ingredient]|||C0731033|NDFRT|||  
LV|LATVIA;Latvia;latvia;LVA|C0023128|||C0023128|AOD;CHV;LCH;MSH;MTH;NCI;SNOMEDCT|||  
LV|LG|||C0023128|NCI|||  
LV|LV|C0023128;C0731033;C1881413|||C0023128;C0731033;C1881413|NCI;PDQ|||  
LV|Lactobacillus viridescens|C0317606|||1|  
LV|Lassa Virus|C0023093|||1|0.0009|  
LV|Latvia (geographic location)|||C0023128|SNOMEDCT|||  
LV|Lelystad virus|C0376535|||1|0.0023|  
LV|Liposome Vesicle;Multilamellar Liposome Vesicles;Small Unilamellar Vesicles|C1881413|||C1881413|MTH;NCI|||  
LV|Lupus vulgaris|C0024131|||1|0.0009|  
LV|MLV|C0026398;C0026626;C1881413|||C1881413|NCI|||  
LV|SUV|C1881413;C2348529|||C1881413|NCI|||  
LV|lactoovovegetarian|||1|  
LV|laryngeal vestibule|C0225564|||C0225564|FMA;MTH;SNOMEDCT;UWDA|||1|  
LV|lateral  
ventricle|C0152279;C1268982|||C0152279;C1268982|CHV;CSP;FMA;MSH;NCI;SNOMEDCT|||1|  
LV|lecithovitellin|C0604480|||C0604480|MSH|||  
LV|left  
ventricle|C0225897;C1269892|1|1.000|C0225897;C1269892|AOD;CHV;FMA;MSH;NCI;SNOMEDCT;UWDA|1|0.119|1|  
LV|left ventricular|||1|0.8664|1|  
LV|left ventricular free wall|||1|0.0005|  
LV|left ventricle|||1|0.001|  
LV|length density|||1|0.0016|  
LV|leucovorin|C0023413|||C0023413|CHV;CSP;MSH;MTH;NCI;NDFRT;PDQ;RXNORM;SNOMEDCT;USPMG;VANDF|||  
LV|leukemia virus|C0596828|||C0596828|AOD;CHV;CSP|||1|  
LV|leukocytoclastic vasculitis|C0151436;C2973529|||1|0.0011|  
LV|lipovitellin|C0065069|||1|0.0013|  
LV|liquid ventilation|C0419019|||1|0.0013|1|  
LV|live vaccine|C0042211|||C0042211|CHV;CSP|||1|  
LV|live virus|||1|  
LV|low vertical|||1|  
LV|low volume|||1|  
LV|lumbar  
vertebra|C0024091;C1269051|||C0024091;C1269051|CHV;FMA;NCI;SNOMEDCT;UWDA|||1|  
LV|lung ventilation|C0554804|||1|0.0007|  
LV|lung volume|C0231953|||C0231953|CHV;CSP;SNOMEDCT|1|0.0017|1|  
M0|M0;M0 Cancer Stage Finding;M0 Distant Metastasis Finding;M0 Distant Metastasis Stage Finding;M0 Metastasis Finding;M0 Metastasis Stage;Metastasis Stage M0;Metastasis stage M0;M0 Stage;M0 stage;M0 Stage Finding;M0 stage (finding);M0 TNM Finding;M0 category|C0445034|||C0445034|NCI;SNOMEDCT|||  
M0|M0 category (finding)|||C0445034|SNOMEDCT|||  
M0|M0 stage (tumor staging)|||C0445034|SNOMEDCT|||  
M0|Metastasis stage M0 (tumor staging)|||C0445034|SNOMEDCT|||  
M0|acute myeloid leukemia with minimal differentiation|C0522631|1|0.002|||1|  
M0|distant metastases|||1|1|  
M0|no evidence of distant metastases||1|0.998|||1|

MAI|GLUTATHIONE S-TRANSFERASE Z1;GLUTATHIONE S-TRANSFERASE, ZETA-1;GSTZ1;GSTZ1  
gene;GSTZ1-1;MAAI;glutathione transferase zeta  
1|C1415341|||C1415341|HUGO;MTH;OMIM|||

MAI|MAC (Mycobacterium avium Complex);Mycobacterium avium complex  
(MAC);mycobacterium avium complex (MAC);MYCOBACTERIUM AVIUM  
COMPLEX;Mycobacterium avium Complex;Mycobacterium avium complex;mycobacterium  
avium  
complex|C0026914;C0026916|||C0026914|CHV;CSP;LNC;MSH;MTH;NCBI;NCI;SNOMEDCT|||

MAI|MAC complex;MAIC;maic;MAIS complex;Mycobacterium avium-intracellulare  
Complex;Mycobacterium avium-intracellulare complex;Mycobacterium, MAIS  
group|C0026914|||C0026914|CHV;MSH;SNOMEDCT|1|0.0352|

MAI|MAI;mai|C0026914;C1415341|||C0026914;C1415341|CHV;HUGO|||

MAI|MALEYLACETOACETATE ISOMERASE;maleylacetoacetate  
isomerase|C0065576;C1415341|||C1415341|HUGO;OMIM|||

MAI|MYCOBACT AVIUM COMPLEX|||C0026914|MSH|||

MAI|MYCOBACT AVIUM INTRACELLULARE|||C0026914|MSH|||

MAI|MYCOBACT AVIUM INTRACELLULARE COMPLEX|||C0026914|MSH|||

MAI|Marriage Adjustment Inventory|||1|

MAI|Medication Appropriateness Index|||1|

MAI|Movement Assessment of Infants|||1|0.0603|1

MAI|Multidimensional Anger Inventory|||1|0.0402|

MAI|Mycobacterium avium-  
intracellulare|C0026914;C2718284|1|1.000|C0026914|MSH|1|0.5829|1

MAI|mac|||C0026914|CHV|||

MAI|magnetic-assisted intervention|||1|

MAI|maximal aggregation index|||1|

MAI|microscopic aggregation index|||1|

MAI|milliampere impulse|||1|

MAI|minor acute illness|||1|

MAI|mitotic activity index|||1|0.2814|1

MAI|morbid anxiety inventory|||1|

MAI|movement arousal index|||1|

MAPS|MAP;MAPs;Map;Maps;map;maps|C0024779;C0026045;C1706473|||C0024779;C0026045|A  
OD;CHV;CSP;FMA;LCH;MSH;MTH;NCI;UWDA|||

MAPS|MICROTUBULE ASSOC PROTEINS|||C0026045|MSH|||

MAPS|Make A Picture Story|||1|

MAPS|Making Action Plans|||1|

MAPS|Microtubule Associated Protein;Microtubule Associated Proteins;Microtubule-  
Associated Proteins;Microtubule-associated protein;microtubule associated  
protein;microtubule-associated proteins;microtubule-associated proteins  
(MAP)|C0026045|||C0026045|CHV;CSP;FMA;MSH;MTH;NCI;NDFRT;UWDA|1|0.7491|

MAPS|Microtubule-Associated Proteins [Chemical/Ingredient]|||C0026045|NDFRT|||

MAPS|Multidimensional Affect and Pain Survey|||1|0.0174|

MAPS|Multiple antigen peptides|||1|0.0244|

MAPS|mean arterial pressures|||1|0.0226|

MAPS|medical advanced pain specialists||1|1.000|||

MAPS|monophasic action potentials|||1|0.1638|

MAPS|multiple antigenic peptides|||1|0.0226|

MCA|1,2-Dihydro-3-methyl-benz(j)aceanthrylene|||C0000325|NCI|||

MCA|20 Methylcholanthrene;20-Methylcholanthrene;20-  
methylcholanthrene|C0000325|||C0000325|MSH;MTH;NCI|1|0.0043|

MCA|3-methylcholanthrene|C0000431|||1|0.0509|

MCA|Arteria cerebri media;Structure of middle cerebral artery;Sylvian  
artery|C0149566|||C0149566|FMA;MTH;SNOMEDCT;UWDA|||

MCA|Arteries, Middle Cerebral;Artery, Middle Cerebral;Cerebral Arteries,  
Middle;Cerebral Artery, Middle;Cerebral artery middle;Middle Cerebral  
Arteries;Middle Cerebral Artery;Middle cerebral artery;Middle cerebral artery,

NOS;artery cerebral middle;middle cerebral  
 artery|C0149566;C1269012|1|1|C0149566;C1269012|CHV;FMA;LNC;MSH;NCI;SNOMEDCT;UWDA  
 |1|0.7959|1  
 MCA|MCA|C0000325;C0149566|||C0000325;C0149566|NCI|||  
 MCA|Metabolic control analysis|||1|0.0092|  
 MCA|Methylcholanthrene;methylcholanthrene|C0000325;C0025732|||C0000325;C0025732|  
 CSP;MSH;MTH;NCI;NDFRT;SNOMEDCT|1|0.0151|1  
 MCA|Multiple Correspondence Analysis|||1|0.0049|  
 MCA|Structure of middle cerebral artery (body structure)|||C0149566|SNOMEDCT|||  
 MCA|carcinoma associated antigen|||1|0.0043|  
 MCA|main coronary artery|||1|1|  
 MCA|major coronary artery|||1|1|  
 MCA|mammary carcinoma|C0678222|||C0678222|NCI|1|0.0033|  
 MCA|medical care administration|||1|1|  
 MCA|mesial contact area|||1|1|  
 MCA|metacarpal amputation|C1384684|||1|1|  
 MCA|methylcyanoacrylate|C0066180|||C0066180|MSH|||  
 MCA|metoclopramide|C0025853|||1|0.0049|  
 MCA|microcarcinoma|||1|1|  
 MCA|microcytotoxicity assay|||1|0.0023|  
 MCA|micrometastases clonogenic assay|||1|1|  
 MCA|middle cerebral|||1|0.0141|  
 MCA|middle cerebral aneurysm|||1|1|  
 MCA|middle cerebral arterial|||1|0.0039|  
 MCA|middle colic artery|C0226328;C1280137|||1|1|  
 MCA|minimal cross-sectional area|||1|0.0062|  
 MCA|monocarboxylic acid|||1|1|  
 MCA|monochloroacetate|C2708021|||C2708021|LNC|1|0.0039|  
 MCA|monochloroacetic  
 acid|C0008225|||C0008225|CHV;MSH;NDFRT;SNOMEDCT;VANDF|1|0.0069|  
 MCA|monoclonal antibodies;monoclonal  
 antibody|C0003250|||C0003250|CHV;CSP;NCI;SNOMEDCT|1|0.0424|  
 MCA|monocyte chemotactic activity|||1|0.0043|  
 MCA|motorcycle accident|C0574035|||C0574035|CHV;SNOMEDCT|||1|  
 MCA|mucin-like carcinoma-associated antigen|||1|0.0108|  
 MCA|mucinlike carcinoma-associated antigen|||1|1|  
 MCA|multichannel analyzer|||1|1|  
 MCA|multiple congenital abnormalities|||1|1|  
 MCA|multiple congenital anomalies;multiple congenital  
 anomaly|C0000772|||C0000772|CHV;CST;ICPC;MTH;SNOMEDCT|1|0.0122|1  
 MCH|Ery. Mean Corpuscular  
 Hemoglobin|C2344229;C0369183;C1261502|||C0369183|NCI|||  
 MCH|Erythrocyte Mean Corpuscular Hemoglobin;MCH - Mean corpuscular  
 haemoglobin;MCH - Mean corpuscular hemoglobin;Mean corpuscular haemoglobin (MCH)  
 - NOS;Mean corpuscular hemoglobin (MCH) - NOS;Mean corpuscular haemoglobin  
 NOS;Mean corpuscular hemoglobin NOS;mean corpuscular  
 hemoglobin|C0369183;C1261502|1|1|C0369183;C1261502|AOD;CHV;MSH;NCI;SNOMEDCT|||1|  
 MCH|Erythrocyte Mean Corpuscular Hemoglobin Test;MCH - Mean cell haemoglobin;MCH  
 - Mean cell hemoglobin;MCH determination;Mean corpuscular haemoglobin  
 determination|C0369183|||C0369183|MTH;SNOMEDCT|||  
 MCH|MCH;MCH -  
 NOS;mch|C0369183;C1418669;C2248810|||C0369183;C1418669;C2248810|GO;HUGO;NCI;OMIM  
 ;SNOMEDCT|||  
 MCH|MCH - NOS (procedure)|||C0369183|SNOMEDCT|||  
 MCH|MELANIN-CONCENTRATING HORMONE;Melanin-concentrating hormone;melanin-  
 concentrating hormone|C0065898;C1418669|||C1418669|OMIM|1|0.3767|1

MCH|Maternal and Child Health;maternal and child health|||||1|0.1947|1  
MCH|Mean cell haemoglobin;Mean cell hemoglobin;mean cell haemoglobin;mean cell hemoglobin||||C0369183|CHV;SNOMEDCT|||1  
MCH|Mean cell haemoglobin (& level);Mean cell hemoglobin (& level)|C1261502|||C0369183|SNOMEDCT|||  
MCH|Mean cell haemoglobin (& level) (procedure)||||C0369183|SNOMEDCT|||  
MCH|Mean corpuscular haemoglobin (MCH) - NOS (procedure)||||C0369183|SNOMEDCT|||  
MCH|Mean corpuscular hemoglobin NOS (procedure)||||C0369183|SNOMEDCT|||  
MCH|Mean corpuscular hemoglobin determination (procedure)||||C0369183|SNOMEDCT|||  
MCH|PMCH;PMCH gene|C1418669|||C1418669|HUGO;MTH;OMIM|||  
MCH|PRO-MELANIN-CONCENTRATING HORMONE;pro-melanin-concentrating hormone|C0526383;C1418669|||C1418669|HUGO;OMIM|||  
MCH|acetyl-beta-methylcholine|C0524770|||||1|0.0127|  
MCH|beta-methylmalyl-CoA dehydratase activity;mesaconyl-CoA hydratase activity;mesaconyl-coenzyme A hydratase activity|C2248810|||C2248810|GO;MTH|||  
MCH|intrafemoral artery infusions of the endothelium-dependent vasodilator methacholine chloride|||||1|0.0058|  
MCH|mean corpuscular Hb|||||1|0.0104|  
MCH|mean corpuscular hemoglobin (MCH) test||||C0369183|CHV|||  
MCH|methacholine|C0600370|||||1|0.3894|1  
MCH|microfibrillar collagen hemostat|C1289976|||||1|  
MCH|mucous cell hyperplasia|||||1|  
MCH|muscle contraction headache|C0393736|||||1|0.0104|1  
MCP|1-methylcyclopropene|C0960343|||||1|0.0171|  
MCP|4 Amino-5-chloro-N-(2-(diethylamino)ethyl)-2-methoxybenzamide||||C0025853|MSH;NDFRT|||  
MCP|ANTIGEN DEFINED BY MONOCLONAL ANTIBODY TRA-2-10||||C1824669|OMIM|||  
MCP|ANTIGENS CD 046;CD 046 ANTIGENS||||C0285488|MSH|||  
MCP|Antigen, CD46;Antigens, CD46;CD46 Antigen;CD46 Antigens;cd46 antigen;Common Antigen, Trophoblast-Leukocyte;Trophoblast Leukocyte Common Antigen;Trophoblast leucocyte common antigen;Trophoblast leukocyte common antigen;Trophoblast-Leukocyte Common Antigen;Gp45-70;Lymphocyte antigen CD46|C0285488|||C0285488|CHV;MSH;MTH;NDFRT;SNOMEDCT|||  
MCP|Antigens, CD46 [Chemical/Ingredient]||||C0285488|NDFRT|||  
MCP|Benzamide, 4-amino-5-chloro-N-(2-(diethylamino)ethyl)-2-methoxy-||||C0025853|MSH;NDFRT|||  
MCP|CAPG|C1413108;C1826382|||C1413108|HUGO;OMIM|||  
MCP|CAPG gene;CAPPING PROTEIN, GELSOLIN-LIKE;MACROPHAGE CAPPING PROTEIN;macrophage capping protein|C1413108|||C1413108|HUGO;MTH;OMIM|||  
MCP|CD46|||C0285488;C1824669|CSP;HUGO;LNC;OMIM;SNOMEDCT|||  
MCP|CD46 - Cluster of differentiation antigen 46||||C0285488|SNOMEDCT|||  
MCP|CD46 gene;COMPLEMENT MEMBRANE COFACTOR PROTEIN;MGC26544;MIC10;TRA2.10;TROPHOBLAST-LYMPHOCYTE CROSS-REACTIVE ANTIGEN|C1824669|||C1824669|HUGO;MTH;OMIM|||  
MCP|CD46 molecule complement regulatory protein;CD46 molecule, complement regulatory protein||||C0285488;C1824669|HUGO;SNOMEDCT|||  
MCP|Cluster of differentiation antigen 46||||C0285488|SNOMEDCT|||  
MCP|Lymphocyte antigen CD46 (substance)||||C0285488|SNOMEDCT|||  
MCP|MCP|||C0025853;C0285488;C1150292;C1413108;C1824669|GO;HUGO;OMIM;PDQ;SNOMEDCT|||  
MCP|MCP - Membrane cofactor protein;membrane cofactor protein (MCP);MEMBRANE COFACTOR PROTEIN;Membrane Cofactor Protein;Membrane cofactor protein;membrane cofactor protein|C0285488;C1824669|||C0285488;C1824669|CHV;MSH;NDFRT;OMIM;SNOMEDCT|||1

MCP|METOCLOPRAMIDE;Metaclopramide;Metoclopramide;metaclopramide;metoclopramide;M  
etaclopramide;metaclopramide|C0025853||C0025853|AOD;CHV;CSP;LNC;MSH;MTH;MTHSPL;  
NCI;NDFRT;RXNORM;SNOMEDCT;USPMG;VANDF|1|0.3251|  
MCP|Membrane cofactor protein (substance)|||C0285488|SNOMEDCT|||  
MCP|Metoclopramide (product)|||C0025853|SNOMEDCT|||  
MCP|Metoclopramide (substance)|||C0025853|SNOMEDCT|||  
MCP|Metoclopramide -RETIRED-|||C0025853|SNOMEDCT|||  
MCP|Metoclopramide [Chemical/Ingredient]|||C0025853|NDFRT|||  
MCP|Metoclopramide(motility) [see chapter d for  
preparations]|||C0025853|SNOMEDCT|||  
MCP|Metoclopramide(motility) [see chapter d for preparations]  
(product)|||C0025853|SNOMEDCT|||  
MCP|Metoclopramide(motility) [see chapter d for preparations]  
(substance)|||C0025853|SNOMEDCT|||  
MCP|TLX|C1417831;C1824669||C1824669|HUGO;OMIM|||  
MCP|TLX - Trophoblast leucocyte common antigen;TLX - Trophoblast leukocyte  
common antigen|||C0285488|SNOMEDCT|||  
MCP|calcium phosphate|C0006711;C0006712;C1161320|||1|0.0114|  
MCP|capping protein (actin filament), gelsolin-like|||C1413108|HUGO|||  
MCP|maximum closure pressure|||1|  
MCP|maximum contraction pattern|||1|  
MCP|mean carotid pressure|||1|  
MCP|mean circulatory pressure|||1|0.0209|  
MCP|medial coronoid process|||1|0.0114|  
MCP|melanocortin receptor|C0254370||C0254370|MSH;MTH;NDFRT|||  
MCP|melanosis circumscripta precancerosa|||1|  
MCP|metacarpophalangeal||1|1.000||1|0.4163|1|  
MCP|methyl-accepting chemotaxis protein|||1|  
MCP|methylclofenapate|C0008998|||1|0.038|  
MCP|methylenecyclopropane|C1699480||C1699480|MSH|||  
MCP|microchannel plate|||1|0.0114|  
MCP|mitotic control protein|||1|  
MCP|monocrotophos|C0026472|||1|0.0247|  
MCP|monocyte chemoattractant protein;monocyte chemotactic  
protein|C0282566||C0282566|CHV||1|  
MCP|mucin clot prevention|||1|  
MCP|mucopolysaccharidoses|C0026703|||1|  
MCP|mucosal carrier protein|||1|  
MCP|multicatalytic protease|||1|0.0171|  
MCP|multicatalytic proteinase|C0208355;C2258865|||1|0.0665|  
MCP|multifocal choroiditis and panuveitis;multifocal choroiditis with  
panuveitis|||1|0.0133|1|  
MCP|proteins|C0033684|||1|0.0266|  
MCP|threonine endopeptidase activity;threonine-type endopeptidase  
activity|C1150292||C1150292|GO;MTH|||  
MCV|CDDP/MTX/VBL|||C0285131|NCI;PDQ|||  
MCV|CMV|||C0285131|CHV;NCI;PDQ|||  
MCV|CMV chemotherapy protocol;MEC Protocol 1;MEC protocol  
1;cisplatin/methotrexate/vinblastine  
protocol|C0285131||C0285131|CHV;MSH;MTH;NCI|||  
MCV|Cell Volumes, Mean;Mean Cell Volume;Mean Cell Volumes;Mean cell  
volume;Volume, Mean Cell;Volumes, Mean Cell;mean cell  
volume|C0524587;C0863148||C0524587;C0863148|CHV;MSH;SNOMEDCT|1|0.1771|1|  
MCV|Cisplatin/Methotrexate/Vinblastine;cisplatin/methotrexate/vinblastine|||C02  
85131|NCI;PDQ|||  
MCV|Corpuscular Volumes, Mean;Mean Corpuscular Volume;Mean Corpuscular  
Volumes;Volume, Mean Corpuscular;Volumes, Mean Corpuscular;corpuscular mean

volume;mean corpuscular volume;mean corpuscular volume  
(MCV)|C0524587;C0863148;C1948043|1|1|C0524587;C0863148;C1948043|AOD;CHV;MSH|1|0.6325|1  
MCV|Ery. Mean Corpuscular  
Volume|C2344229;C0524587;C0863148;C1948043|||C1948043|NCI|||  
MCV|Erythrocyte Mean Corpuscular Volume;Erythrocyte mean corpuscular  
volume|C0524587;C1948043|||C0524587;C1948043|LNC;NCI;SNOMEDCT|||  
MCV|Erythrocyte Mean Corpuscular Volume Measurement|C1948043|||C1948043|MTH|||  
MCV|Erythrocyte Volume, Mean Cell;Finding of mean cell volume;Mean cell volume -  
finding;MCV;MCV - NOS;McV;mcV;mcv;Mean Corpuscular Volume  
(result)|C0524587|||C0285131;C0524587;C1948043;C1961129;C2304881|AOD;CHV;MSH;MTH  
;NCI;PDQ;SNOMEDCT|||  
MCV|Erythrocyte mean corpuscular volume (observable  
entity)|||C0524587|SNOMEDCT|||  
MCV|Finding of mean cell volume (finding)|||C0524587|SNOMEDCT|||  
MCV|MCPyV;Merkel Cell Polyomavirus;Merkel cell polyomavirus;Merkel cell  
polyomaviruses;polyomavirus, Merkel cell;polyomaviruses, Merkel  
cell|C2304881|||C2304881|MSH;MTH;NCBI;NCI|||  
MCV|MCV - NOS (finding)|||C0524587|SNOMEDCT|||  
MCV|Microvolt|C1961129|||C1961129|MTH;NCI;SNOMEDCT|||  
MCV|Microvolt (qualifier value)|||C1961129|SNOMEDCT|||  
MCV|Middle cardiac vein;middle cardiac  
vein|C0226660;C1280940|||C0226660;C1280940|FMA;NCI;SNOMEDCT;UWDA|1|0.0157|  
MCV|conduction velocities|C0234084|||1|0.0157|  
MCV|mean clinical value|||1|  
MCV|measles-containing vaccine|||1|0.012|1  
MCV|melanoma cell vaccine|||1|0.012|  
MCV|melanoma whole-cell vaccine|||1|  
MCV|molluscum contagiosum  
virus|C0026394|||C0026394|CSP;MSH;MTH;NCBI;SNOMEDCT|1|0.0723|1  
MCV|motor conduction velocity|||1|  
MCV|motor nerve conduction velocity|C0457379|||C0457379|CHV;SNOMEDCT|1|0.0627|  
MCV|myelocytomatosis virus|||1|  
MCV|uV|C0041625;C1961129|||C1961129|NCI|||  
MDI|BIPOLAR AFFECTIVE DISORDER|C0005586|||C1839839|OMIM|||  
MDI|BPAD|||C1839839|OMIM|||  
MDI|MAFD2;MAJOR AFFECTIVE DISORDER 2|C1416966;C1839839|||C1839839|MTH;OMIM|||  
MDI|MANIC-DEPRESSIVE ILLNESS;manic-depressive  
illness|C0005586;C1839839|||C0005586;C1839839|CHV;MEDLINEPLUS;OMIM;SNOMEDCT|1|0.0346|1  
MDI|MANIC-DEPRESSIVE PSYCHOSIS, X-LINKED;MDX|C1839839|||C1839839|OMIM|||  
MDI|MDI|C1839839;C2984065|||C1839839;C2984065|NCI;OMIM|||  
MDI|Major Depression Inventory|||1|0.0159|  
MDI|Mental Development Index;mental development index|C2825548|||1|0.0749|1  
MDI|Mental Developmental Index|||1|0.0634|  
MDI|Metered Dose Inhaler Dosage Form|C2984065|||C2984065|NCI|||  
MDI|Metered Dose Inhaler Dose Form|C0993596;C2984065|||C2984065|NCI|||  
MDI|Michelson Doppler imager|||1|  
MDI|Multiscore Depression Inventory|||1|  
MDI|diphenylmethane diisocyanate;methylene diphenyl  
diisocyanate|C0047822|||1|0.0591|1  
MDI|diphenylmethane-4,4'-diisocyanate|||1|0.0231|  
MDI|isocyanate|C0162344|||1|0.0144|  
MDI|metered dose inhaler;metered-dose  
inhaler|C0418991;C0993596|1|1|C0418991;C0993596|CHV;HL7V3.0;MSH;MTH;NCI;NDFRT;RX  
NORM;SNOMEDCT|1|0.6585|1  
MDI|methylenedioxyindenes|||1|

MDI|modulation detection interference|||||1|0.0159|  
MDI|multidirectional instability|||||1|  
MDI|multiple daily injection;multiple daily injections|||||1|0.0403|1  
MDI|multiple dose injection|||||1|  
MD|Doctor of Medicine;M.D.|C1512018|||C1512018|HL7V2.5;MTH;NCI|||  
MD|Dorsal Medial Nucleus;Medial Dorsal Nucleus;Medial dorsal nucleus;Nucleus,  
Dorsal Medial;Nucleus, Medial Dorsal;medial dorsal nucleus;Dorsomedial Nucleus  
of the Thalamus;Dorsomedial nucleus of  
thalamus|C0228329;C1284630|||C0228329|CHV;FMA;MSH;MTH;NCI;SNOMEDCT|||  
MD|Dorsal medial nucleus of thalamus;Medial dorsal nucleus of  
thalamus;Dorsomedial Nucleus;Dorsomedial nucleus;Nucleus,  
Dorsomedial;Dorsomedial Thalamic Nucleus;Nucleus, Dorsomedial Thalamic;Thalamic  
Nucleus, Dorsomedial;Dorsomedial nuclear group;Medial nuclear group;Medial  
nuclear group of thalamus;Medial nuclear group of thalamus, NOS;Medial thalamic  
nuclei;Medial thalamic nucleus;Mediodorsal Nucleus;Mediodorsal nucleus;Nucleus,  
Mediodorsal;Mediodorsal Thalamic Nucleus;Mediodorsal thalamic nucleus;Nucleus,  
Mediodorsal Thalamic;Thalamic Nucleus, Mediodorsal;mediodorsal thalamic  
nucleus;thalamic mediodorsal nucleus;Nucleus dorsomedialis thalami;Nucleus  
medialis dorsalis;Nucleus medialis dorsalis thalami;Nucleus mediodorsalis  
thalami;Structure of dorsomedial nucleus of  
thalamus|C0228329|||C0228329|FMA;MSH;SNOMEDCT|1|0.0248|  
MD|Dystrophies, Muscular;Dystrophy, Muscular;Muscular Dystrophies;Muscular  
Dystrophy;Muscular dystrophy;Muscular dystrophy NOS;Muscular dystrophy,  
NOS;muscular dystrophies;muscular dystrophy;Hereditary progressive muscular  
dystrophy;Hereditary progressive muscular dystrophy NOS;Hereditary progressive  
muscular dystrophy, NOS;MD - Muscular  
dystrophy;Myodystrophica;Myodystrophicas;Myodystrophies;Myodystrophy;myodystroph  
y;PMD - Progressive muscular dystrophy;Progressive muscular  
dystrophy;progressive muscular  
dystrophy|C0026850|||C0026850|AOD;CHV;COSTAR;CSP;ICD9CM;LCH;MEDLINEPLUS;MSH;MTH;  
MTHICD9;NCI;NDFRT;OMIM;SNOMEDCT|1|0.0291|1  
MD|Hered prog musc dystrophy|||C0026850|ICD9CM|||  
MD|Hereditary progressive muscular dystrophy (disorder);Hereditary progressive  
muscular dystrophy NOS (disorder)|||C0026850|SNOMEDCT|||  
MD|MD|||C0024858;C0026374;C0026850;C0228329;C1512018|FMA;MEDLINEPLUS;NCI|||  
MD|MDA|C0000379;C0026374|||C0026374|NCI|||  
MD|MOLDOVA, REPUBLIC OF;Moldova, Republic of;Republic of  
Moldova;Moldavia;Moldova;moldavia;moldova;Moldavian S.S.R.;Moldavian  
SSR|C0026374|||C0026374|AOD;CHV;LCH;MSH;MTH;NCI;SNOMEDCT|||  
MD|Mantoux diameter|||||1|  
MD|Marek disease;Marek's disease|C0024793|||||1|0.1075|1  
MD|Maryland;maryland;Maryland (geographic  
location)|C0024858|||C0024858|AOD;CHV;LCH;MSH;MTH;NCI;SNOMEDCT|||  
MD|Mean deviation;mean deviation|C1828170|||C1828170|SNOMEDCT|1|0.0531|1  
MD|Meckel diverticulum;Meckel's diverticulum|C0025037|||||1|0.0137|1  
MD|Mixed Dementia|||||1|0.0043|  
MD|Moldavia (geographic location)|||C0026374|SNOMEDCT|||  
MD|Monocular deprivation;monocular deprivation|||||1|0.0231|1  
MD|Movement disorders;movement  
disorder|C0026650|||C0026650|CHV;COSTAR;CSP;CST;MSH;SNOMEDCT|1|0.0034|1  
MD|Muscular Dystrophies [Disease/Finding]|||C0026850|NDFRT|||  
MD|Muscular dystrophy (disorder)|||C0026850|SNOMEDCT|||  
MD|Myelin deficiency|||||1|0.0026|  
MD|Nuclei mediales (thalami)|C1305699|||C0228329|FMA|||  
MD|Nucleus medialis dorsalis (Hassler)|||C0228329|FMA|||  
MD|Nucleus medialis dorsalis (body structure)|||C0228329|SNOMEDCT|||

MD|Structure of dorsomedial nucleus of thalamus (body structure)|||C0228329|SNOMEDCT|||  
MD|Structure of medial nuclear group of thalamus|||C0228329|SNOMEDCT|||  
MD|Structure of medial nuclear group of thalamus (body structure)|||C0228329|SNOMEDCT|||  
MD|diabetic|C0241863|||1|0.0043|  
MD|diseases|C0012634|||1|0.0051|  
MD|distance|C0012751|||1|0.0069|  
MD|macula densa|C0227662;C1280231|||1|0.03|1|  
MD|macular degeneration|C0024437;C0242383|||1|  
MD|magnesium deficiency|C0024473||C0024473|CHV;CSP;MSH;MTH;NDFRT;SNOMEDCT|||1|  
MD|main duct|||1|  
MD|maintenance dialysis|||1|  
MD|maintenance dose|||1|0.0047|1|  
MD|major depression;major depressive disorder|C0041696;C1269683||C0041696;C1269683|AOD;CHV;COSTAR;CSP;NCI;SNOMEDCT|1|0.0792|1|  
MD|malate dehydrogenase|C0024544;C0373676||C0024544;C0373676|CHV;CSP;LCH;LNC;MSH;MTH;NDFRT;SNOMEDCT|||1|  
MD|malignant disease|C0442867||C0442867|CHV;SNOMEDCT|||  
MD|malrotation of duodenum|||1|  
MD|mammary dysplasia|C0016034|||1|  
MD|mandibular|C0024687|||1|  
MD|manic depression;manic depressive;manic-depressive|C0005586||C0005586|CHV|||1|  
MD|maternal deprivation|C0024920||C0024920|CHV;LCH;MSH;SNOMEDCT|1|0.0056|1|  
MD|maximal dose|||1|  
MD|mean defect|||1|0.018|  
MD|mean diastolic|||1|  
MD|mean difference|||1|0.0116|  
MD|measurable disease|C1513041|||1|  
MD|medial dorsal|||1|0.0043|  
MD|medialis dorsalis|||1|0.0043|1|  
MD|median|C0549183;C0876920;C2347635;C2348144;C2939193|||1|  
MD|mediastinal disease|C0025061||C0025061|CHV;MSH;NCI;SNOMEDCT|||1|  
MD|medical department|C0587450||C0587450|CHV;MTH;SNOMEDCT|||1|  
MD|medical doctor|C0031831|1|1.000|||1|  
MD|mediodorsal|||1|0.0223|1|  
MD|mediodorsal nucleus of the thalamus|||1|0.0141|  
MD|mediodorsal thalamus|||1|0.0043|  
MD|medium dosage|||1|  
MD|megadaltons|||1|0.0128|  
MD|menadione|C0025270|||1|0.0064|  
MD|mendelevium|C0025275|||1|  
MD|meningococcal disease|C0025303|||1|  
MD|mental deficiency|C0917816||C0917816|AOD;CHV;COSTAR;CST;MSH;MTH;OMIM|||1|  
MD|mental depression|C0011570||C0011570|CHV;MTH|||1|  
MD|mentally deficient|C0079822|||1|  
MD|mesiodistal|||1|  
MD|methylchloroarsine|C0168004|||1|  
MD|methyl dopa|C0025741|||1|0.0039|  
MD|microdensitometry|||1|0.0081|  
MD|microdialysis|C0206056|||1|0.0201|  
MD|microtube dilution|||1|  
MD|microvessel density|||1|0.0047|  
MD|minimum dosage|||1|

MD|mitral disease|C0865573|||C0865573|MTHICD9|||1  
MD|mixed diet|||1  
MD|moderate disability|||1|0.0026|1  
MD|moderately differentiated|||1|0.0039|1  
MD|molecular dynamics|C0596957|||1|0.3448|  
MD|molecular dynamics simulations|C2717775|||1|0.0056|  
MD|monocularly deprived|||1|0.0086|  
MD|motion-defined|||1|0.0047|  
MD|multiple deficiency|||1  
MD|multiple dendritic|||1|0.0039|  
MD|multiple dose|||1  
MD|myelin-deficient|||1|0.0223|  
MD|myelodysplasia|C0026985;C0026986;C0033027|||C0026985;C0026986;C0033027;C19630  
99|CHV;COSTAR;DXP;MTH;MTHICD9;NCI;OMIM;PDQ;SNOMEDCT|||  
MD|myeloproliferative disease|C0027022|||1  
MD|myocardial damage|||1  
MD|myocardial disease|C0878544|||C0878544|CHV;CSP;MSH;MTHICD9;SNOMEDCT|||1  
MD|myotonic  
dystrophy|C0027126|||C0027126|CHV;COSTAR;CSP;MSH;MTH;MTHICD9;NCI;NDFRT;SNOMEDCT|  
1|0.0638|1  
MD|patients with Meniere's disease|||1|0.0077|  
MDS|CHROMOSOME 17p13.3 DELETION SYNDROME;Lissencephaly Syndrome, Miller  
Dieker;Lissencephaly Syndrome, Miller-Dieker;MILLER-DIEKER LISSENCEPHALY  
SYNDROME;Miller-Dieker Lissencephaly Syndrome;Miller-Dieker lissencephaly  
syndrome;Syndrome, Miller-Dieker Lissencephaly;Lissencephaly  
syndrome;lissencephaly syndrome;Lissencephaly, Miller Dieker;Lissencephaly,  
Miller-Dieker;Miller-Dieker Lissencephaly;MDLS;Miller Dieker Syndrome;Miller  
Dieker syndrome;Miller-Dieker Syndrome;Miller-Dieker syndrome;Syndrome, Miller-  
Dieker;miller dieker syndrome;miller-dieker  
syndrome|C0265219|||C0265219|CHV;MSH;MTH;MTHICD9;OMIM;SNOMEDCT|||  
MDS|Dysmyelopoietic Syndrome;Dysmyelopoietic Syndromes;Dysmyelopoietic  
syndrome;Syndrome, Dysmyelopoietic;Syndromes, Dysmyelopoietic;MDS -  
Myelodysplastic syndrome;Myelodysplastic Neoplasm;Myelodysplastic syndrome,  
unspecified;Oligoblastic Leukemia;PRELEUKEMIC SYNDROME;Preleukaemic  
syndrome;Preleukemic  
syndrome;dysmyelopoiesis|C0026986|||C0026986|DXP;ICD9CM;MSH;MTH;NCI;NDFRT;PDQ;SN  
OMEDCT|||  
MDS|Hematopoietic - Myelodysplastic Syndrome (MDS)|||C0026986|NCI|||  
MDS|LIS1|C1418245;C1843916;C2698684|||C2698684|NCI|||  
MDS|LIS2|C0796089;C1418248;C2698684|||C2698684|NCI|||  
MDS|MDCR|C1855481;C2698684|||C2698684|NCI|||  
MDS|MDS|||C0026986;C0265219;C1879299;C2698684|LNC;NCI;OMIM|||  
MDS|MYELOYDYSPLASTIC SYNDROME;Myelodysplastic Syndrome;Myelodysplastic  
Syndromes;Myelodysplastic syndrome;Myelodysplastic syndrome, NOS;Myelodysplastic  
syndromes;Syndrome, Myelodysplastic;Syndromes, Myelodysplastic;myelodysplastic  
syndrome;myelodysplastic  
syndromes;Preleukaemia;Preleukemia|C0026986;C0033027|1|0.998|C002698  
6;C0033027|CHV;COSTAR;LCH;MSH;NCI;NDFRT;OMIM;PDQ;SNOMEDCT|1|0.8756|1  
MDS|Miller Dieker syndrome (disorder);Miller-Dieker syndrome  
(disorder)|||C0265219|SNOMEDCT|||  
MDS|Miller-Dieker Syndrome Chromosome Region Gene;PAFAH1B1 wt Allele;Platelet-  
Activating Factor Acetylhydrolase, Isoform Ib, Alpha Subunit 45kDa wt  
Allele|C2698684|||C2698684|MTH;NCI|||  
MDS|Miller-Dieker syndrome (disorder) [Ambiguous]|||C0265219|SNOMEDCT|||  
MDS|Minimum Data Set, 2.0;Minimum data set;minimum data  
set|C1879299|||C1879299|LNC;MTH|1|0.0527|1

MDS|Myelodysplasia;myelodysplasia|C0026985;C0026986;C0033027|||C0026986|CHV;NCI;OMIM;PDQ;SNOMEDCT|||
MDS|Myelodysplasia (disorder)|||C0026986|SNOMEDCT|||
MDS|Myelodysplastic Syndrome/Neoplasm|||C0026986|NCI|||
MDS|Myelodysplastic Syndromes [Disease/Finding]|||C0026986|NDFRT|||
MDS|Myelodysplastic synd NOS|||C0026986|ICD9CM|||
MDS|Myelodysplastic syndrome (clinical)|||C0026986|SNOMEDCT|||
MDS|Myelodysplastic syndrome (disorder)|||C0026986|SNOMEDCT|||
MDS|Myelodysplastic syndrome (morphologic abnormality)|||C0026986|SNOMEDCT|||
MDS|Myelodysplastic syndrome (morphology)|||C0026986|SNOMEDCT|||
MDS|Myelodysplastic syndrome (morphology) -Retired-|||C0026986|SNOMEDCT|||
MDS|PAFAH|C1418245;C1418625;C2698684|||C2698684|NCI|||
MDS|Platelet-Activating Factor Acetylhydrolase, Isoform Ib, Alpha Subunit (45kD) Gene|||C2698684|NCI|||
MDS|Smoldering Leukemia;Smoldering leukemia;Smouldering leukaemia;smoldering leukemia|C0002894;C0026986|||C0026986|NCI;SNOMEDCT|||
MDS|[M]Myelodysplastic syndrome|||C0026986|SNOMEDCT|||
MDS|[X]Myelodysplastic syndrome, unspecified|||C0026986|SNOMEDCT|||
MDS|[X]Myelodysplastic syndrome, unspecified (disorder)|||C0026986|SNOMEDCT|||
MDS|maternal deprivation syndrome|||1
MDS|medical data screen|||1
MDS|medical data system|||1
MDS|membrane-spanning domain|||1
MDS|microdebrider system|||1
MDS|microdialysis system|||1|0.0096|
MDS|microdilution system|||1
MDS|microsurgical drill system|||1
MDS|milk drinker's syndrome|C0026141|||1
MDS|multidimensional scaling|C0681930|||1|0.0431|1
MDS|multilineage dysplasia|||1|0.002|||
MDS|myelodysplastic|||1|0.007|
MDS|myocardial depressant substance|||1
MDS|patients with myelodysplasia|||1|0.007|
MDS|physicians|C0031831|||1|0.005|
MFM|Millipore filter method|||1
MFM|magnetic force microscope|||1
MFM|magnetic force microscopy|||1
MFM|maternal fetal medicine;maternal-fetal medicine|C1555790|1|1|||1|0.4737|1
MFM|multifidus muscle|C0224319|||1
MFM|myofibrillar myopathy|C2678065|||1|0.5263|
MICD|MHC class I polypeptide-related sequence D (pseudogene)|||C1417165|HUGO|||
MICD|MICD;MICD gene;PERB11.4|C1417165|||C1417165|HUGO;MTH|||
MICD|mental illness chemical dependency|||1|1.000|||
MI|AMI|||C0027051|AOD;CHV|||
MI|ATTACK CORONARY;attacks coronary;coronary attack;ATTACK HEART (NOS);Attack - heart;HEART ATTACK;Heart Attack;Heart attack;Heart attack, NOS;attack hearts;attacking heart;attacks hearts;heart attack;heart attacks;Cardiac infarction;Cardiac infarction, NOS;cardiac infarction;HEART INFARCTION;Infarction of heart;Infarction of heart, NOS;heart infarction;INFARCT MYOCARDIAL;Infarct, Myocardial;Infarcts, Myocardial;MYOCARDIAL INFARCT;Myocardial Infarct;Myocardial Infarcts;Myocardial infarct;infarcts myocardial;myocardial infarct;myocardial infarcted;myocardial infarcts;mied;mies;syndrome myocardial infarction|C0027051|||C0027051|AOD;CHV;CSP;CST;DXP;MEDLINEPLUS;MSH;NCI;NDFRT;SNO MEDCT|1|0.0353|

MI|History of Myocardial Infarction Within 6 Months;History of myocardial infarction within 6 months;history of myocardial infarction within 6 months|||C0278960|MTH;NCI;PDQ|||

MI|INFARCTION (MI), MYOCARDIAL;MI - Myocardial infarction;MI, MYOCARDIAL INFARCTION;MYOCARDIAL INFARCTION, (MI);Myocardial infarction (MI);Infarction, Myocardial;Infarctions, Myocardial;MYOCARDIAL INFARCTION;Myocardial Infarction;Myocardial Infarctions;Myocardial infarction;Myocardial infarction NOS;Myocardial infarction, NOS;infarctions myocardial;myocardial infarction;myocardial infarctions|C0027051;C2926063|1|1|C0027051|AIR;AOD;CHV;COSTAR;CSP;CST;LNC;MEDLINEPLUS;MSH;MTH;MTHICD9;NCI;NDFRT;OMIM;SNOMEDCT|1|0.0371|1

MI|MALAWI;Malawi;malawi;MWI;Nyasaland;Republic of Malawi|C0024548|||C0024548|AOD;CHV;LCH;MSH;MTH;NCI;SNOMEDCT|||

MI|MI;Mi;MITF wt Allele;Microphthalmia-Associated Transcription Factor wt Allele|C2346914|||C0024548;C0025939;C0025953;C0027051;C0278960;C0332288;C1417172;C1553043;C2346914|CHV;CSP;HUGO;MEDLINEPLUS;MSH;MTH;NCI;OMIM;PDQ;SNOMEDCT|||

MI|MICROBIOL|||C0025953|MSH|||

MI|MICROPTHALMIA, MOUSE, HOMOLOG OF;homolog of mouse microphthalmia;MITF;MITF Gene;MITF gene;Microphthalmia-Associated Transcription Factor Gene|C1417172|||C1417172|HUGO;MTH;NCI;OMIM|||

MI|MICROPTHALMIA-ASSOCIATED TRANSCRIPTION FACTOR;microphthalmia-associated transcription factor|C0218694;C1417172|||C1417172|HUGO;OMIM|||

MI|MW|C0024548;C0026385;C0556966|||C0024548|NCI|||

MI|Magical Ideation|||1|0.0067|

MI|Malawi (geographic location)|||C0024548|SNOMEDCT|||

MI|Mebi;mebi|C1553043|||C1553043|HL7V3.0;MTH;NCI|||

MI|Meiosis I;meiosis I|C1155812|||1|0.0152|1

MI|Metabolic Intermediate|||1|0.0079|

MI|Michigan;michigan;Michigan (geographic location)|C0025939|||C0025939|AOD;CHV;LCH;MSH;MTH;NCI;SNOMEDCT|||

MI|Microbiological|C0025953|||C0025953|MTH|||

MI|Minus;minus|C0332288|||C0332288|CHV;SNOMEDCT|||

MI|Myocardial Infarction [Disease/Finding]|||C0027051|NDFRT|||

MI|Myocardial infarction (disorder);disorder infarction myocardial|||C0027051|CHV;SNOMEDCT|||

MI|WS2A|||C2346914|NCI|||

MI|Without;without|||C0332288|CHV;MTH;NCI;SNOMEDCT|||

MI|Without (attribute)|||C0332288|SNOMEDCT|||

MI|after acute myocardial infarction|||1|0.0718|

MI|bHLHe32|C0218694;C1417172;C2346914|||C1417172;C2346914|HUGO;NCI|||

MI|cardiac remodeling after myocardial infarction|||1|0.0061|

MI|first meiotic division|||1|0.0043|

MI|first meiotic metaphase|||1|0.003|

MI|infection|C0021311|||1|0.0067|

MI|intensity|C0522510|||1|0.0073|

MI|intervention|C0886296;C1273869;C1948041|||1|0.0073|

MI|macrophage migration inhibition|||1|0.003|

MI|magnetic-guided intubation|||1|

MI|massa intermedia|C0228325;C1289610|||C0228325;C1289610|FMA;SNOMEDCT|||

MI|maturation index|||1|

MI|meconium ileus|C0270246;C0546982;C2939175|||1|0.0134|1

MI|medical inspection|C0582103|||C0582103|NCI|||1

MI|melanophore index|||1|

MI|membrane intact|||1|

MI|menstruation induction|||1|

MI|mental illness|C0004936|||C0004936|AOD;CHV;CSP;MEDLINEPLUS;NCI;SNOMEDCT|||1

MI|mental institution|C0020021|||C0020021|MSH|||1

MI|mentally impaired|||||||1  
MI|mesenteric ischemia|C0920157|||||||1  
MI|mesioincisal|||||||1  
MI|metabolic index|||||||1  
MI|metabolic inhibition|C0021469|||||1|0.0225|  
MI|metaphase I|||||1|0.0517|  
MI|methyl indole|||||||1  
MI|microbiology|C0025952;C0025953;C0085672|||C0025953|MSH|||  
MI|microphthalmic|||||||1|0.0061|  
MI|microsatellite instability|C0796369;C0920269|||||1|0.0883|1  
MI|migration index|||||||1  
MI|migration inhibition|||||||1  
MI|mild irritant|||||||1  
MI|mile|C0331865;C2347127;C2348616|||||||1  
MI|mitotic|C1513354|||||1|0.011|  
MI|mitotic index;mitotic  
indices|C0812425|||C0812425|CHV;LNC;MSH;NCI;SNOMEDCT|1|0.2264|1  
MI|mitral incompetence;mitral  
insufficiency|C0026266|||C0026266|CHV;COSTAR;CST;DXP;MSH;NCI;NDFRT;OMIM;SNOMEDCT  
|1|0.0207|1  
MI|mononucleosis infectiosa|||||||1  
MI|morphology index|||||||1  
MI|motility index|||||||1  
MI|motivational interviewing|C0683474|||||1|0.0256|  
MI|motor imagery|||||||1|0.0085|  
MI|mouse microphthalmia|||||||1|0.0061|  
MI|multiple imputation|||||||1|0.0079|  
MI|mutual information|||||||1|0.0225|  
MI|myo-inositol;myoinositol|C0021547|||C0021547|FMA;NCI;PDQ|||1  
MI|myocardial  
ischemia|C0010054;C0151744|||C0010054;C0151744|AOD;CHV;CSP;CST;LNC;MSH;MTH;MTHIC  
D9;NDFRT;OMIM;SNOMEDCT|1|0.0274|1  
MI|myocardial necrosis|C0027051;C1442837|||C0027051|CHV|||  
MI|myometrial invasion|||||||1|0.0055|  
MI|nono|C0332288;C1417758|||C0332288|NCI|||  
MI|patients after myocardial infarction|||||||1|0.0329|  
MI|patients with acute myocardial infarction|||||||1|0.1223|  
MI|primary motor|||||||1|0.0158|  
MI|primary motor area|||||||1|0.0037|  
MI|primary motor cortex|C0026607|||||1|0.0645|  
MI|ventricular remodeling after myocardial infarction|||||||1|0.0055|  
MMF|DHAD/5-FU/MTX|||C0083765|NCI;PDQ|||  
MMF|Fluorouracil/Methotrexate/Mitoxantrone;fluorouracil/methotrexate/mitoxantron  
e|||C0083765|NCI;PDQ|||  
MMF|MMF|C0083765;C0209368|||C0083765;C0209368|NCI;PDQ|||  
MMF|MYCOPHENOLATE MOFETIL;Mycophenolate Mofetil;Mycophenolate mofetil;mofetil  
mycophenolate;mycophenolate mofetil;mycophenolic acid morpholinoethyl  
ester|C0209368|1|1|C0209368|CHV;CSP;MSH;MTH;MTHSPL;NCI;NDFRT;PDQ;RXNORM;SNOMEDCT  
;USPMG;VANDF|1|0.9232|  
MMF|Mycophenolate mofetil (product)|||C0209368|SNOMEDCT|||  
MMF|Mycophenolate mofetil (substance)|||C0209368|SNOMEDCT|||  
MMF|NMF|C0066373;C0083765;C1882111|||C0083765|NCI;PDQ|||  
MMF|NMF protocol;fluorouracil/methotrexate/mitoxantrone  
protocol|C0083765|||C0083765|MSH;MTH|||  
MMF|fraction|C1264633;C1554103|||||1|0.0093|  
MMF|macrophagic myofasciitis|C2931639|||C2931639|MSH|1|0.0114|  
MMF|mandibulomaxillary fixation|||||||1

MMF|maxillomandibular fixation|C0376509|||C0376509|MSH|1|0.0342|1  
MMF|maximal midexpiratory flow|||||1  
MMF|maximal midexpiratory flow  
rate|C0024966;C1306018|||C0024966;C1306018|AOD;MSH;MTH|||  
MMF|maximum mid-expiratory flow|||||1|0.0041|  
MMF|mean maximal flow|||||1  
MMF|mismatch field|||||1|0.0176|  
MMF|monomethylformamide|C0066373|||C0066373|MSH;NCI;PDQ|||  
MMF|monomethylfumarate|C0209986|||C0209986|MSH|||  
MMF|mycophenolate mofetil [Chemical/Ingredient]||||C0209368|NDFRT|||  
MN|BLOOD GROUP--MN LOCUS;GYPA Gene;GYPA  
gene|C1367455|||C1367455|HUGO;MTH;NCI;OMIM|||  
MN|CA IX;CAIX;CA9;CA9 gene;CARBONIC ANHYDRASE IX;carbonic anhydrase IX;MEMBRANE  
ANTIGEN MN|C1413052|||C1413052|HUGO;MTH;OMIM|||  
MN|CD235a|C0017955;C1367455|||C1367455|HUGO;LNC|||  
MN|Dietary Manganese|C2348271|||C2348271|MTH;NCI|||  
MN|GPA|||C1367455;C1706550|HUGO;NCI|||  
MN|GYPA|||C1367455;C1706550|HUGO;NCI;OMIM|||  
MN|GYPA wt Allele|C1706550|||C1706550|MTH;NCI|||  
MN|Glycophorin A (Includes MN Blood Group) Gene|||C1367455|NCI|||  
MN|Glycophorin A (Includes MN Blood Group) wt Allele|||C1706550|NCI|||  
MN|MANGANESE;Manganese;Manganese,  
NOS;manganese|C0024706;C2348271|||C0024706;C2348271|AOD;CHV;CSP;LCH;LNC;MSH;MTH;  
MTHSPL;NCI;NDFRT;RXNORM;SNOMEDCT;USPMG;VANDF|1|0.2704|1  
MN|MC|||C0026405|NCI|||  
MN|MCO|C0026405;C0605527;C1417073|||C0026405|NCI|||  
MN|MG|C1960952;C2346927|||C0026410|NCI|||  
MN|MN;MNS;Mn|C0025237;C1415376;C1706550|||C0024706;C0026183;C0026405;C0026410;C1  
367455;C1413052;C1706550;C2348271|AOD;HUGO;LNC;NCI;OMIM|||  
MN|MNG|C0025800;C0026410|||C0026410|NCI|||  
MN|MONACO;Monaco;monaco|C0026405|||C0026405|AOD;CHV;MSH;MTH;NCI;SNOMEDCT|||  
MN|MONGOLIA;Mongolia;mongolia|C0026410|||C0026410|AOD;CHV;LCH;MSH;MTH;NCI;SNOMED  
CT|||  
MN|Manganese (product)|||C0024706|SNOMEDCT|||  
MN|Manganese (substance)|||C0024706|SNOMEDCT|||  
MN|Manganese [Chemical/Ingredient]||||C0024706|NDFRT|||  
MN|Mauthner neurons|||||1|0.0049|  
MN|Melanocytic nevi;melanocytic  
nevus|C0027962;C1456781|||C0027962;C1456781|CHV;MSH;MTH;NCI;SNOMEDCT|1|0.0103|1  
MN|Membranous nephropathy;membranous  
nephropathy|C0017665|||C0017665|CHV;CSP;MSH;NDFRT|1|0.0955|1  
MN|Minnesota;minnesota|C0026183|1|1|C0026183|AOD;CHV;LCH;MSH;MTH;NCI;SNOMEDCT|||  
MN|Minnesota (geographic location)|||C0026183|SNOMEDCT|||  
MN|Mn - Manganese;Mn element|C0024706|||C0024706|CSP;SNOMEDCT|||  
MN|Monaco (geographic location)|||C0026405|SNOMEDCT|||  
MN|Mongolia (geographic location)|||C0026410|SNOMEDCT|||  
MN|RCC-associated protein G250|||C1413052|HUGO|||  
MN|blood group in MNS blood group system|||||1  
MN|blood monocytes|C0026473|||||1|0.006|  
MN|carbonic dehydratase|C1413052;C1538425|||C1413052|HUGO|||  
MN|glycophorin A (MNS blood group)|||C1367455|HUGO|||  
MN|malignant nephrosclerosis|C0238307|||||1  
MN|meal number|||||1|0.0049|  
MN|median  
nerve|C0025058;C1278845|||C0025058;C1278845|CHV;FMA;LCH;MSH;NCI;SNOMEDCT;UWDA|1|  
0.0141|1  
MN|meganewton|||||1

MN|melena neonatorum|||||1  
MN|membranous neuropathy|||||1  
MN|mental nerve|C0228739;C1281199|||||1|0.0054|  
MN|mesenteric node|C0229792|||C0229792|CHV;FMA;UWDA|||1  
MN|metanephrine|C0025562|||C0025562|AOD;CHV;CSP;LNC;MSH;MTH;NDFRT;SNOMEDCT|||1  
MN|methyl nicotinate|C0066412|||||1|0.0087|  
MN|micrococcal nuclease|C0025965|||||1|0.006|  
MN|micronucleated|||||1  
MN|micronuclei;micronucleus|C0026004|||C0026004|AOD;CHV;CSP;GO;SNOMEDCT|1|0.5043  
|1  
MN|micronucleus assay;micronucleus test|C0026006|||||1|0.0092|  
MN|midnight|C0332172|||C0332172|CHV;SNOMEDCT|||1  
MN|millinormal|||||1  
MN|mononuclear|C1513475|||||1  
MN|mononuclear cells|C0806987|||||1|0.0109|  
MN|motoneuron;motor  
neuron|C0026609|||C0026609|AOD;CHV;CSP;FMA;MSH;NCI;SNOMEDCT|1|0.0364|1  
MN|mucosal neurolysis|||||1  
MN|multinodular|C0205416|||||1  
MN|myoneural|||||1  
MN|nucleus|C0007610|||||1|0.0076|  
MN|number average molecular weight|||||1|0.0054|  
MOM|Miokamycin;miocamycin|C0026202|||||1|0.1379|  
MOM|MoM;Multiple of the median;multiple of the median;multiples of  
median;multiples of the median|C1442163|1|0.878|C1442163|LNC;SNOMEDCT|1|0.7143|1  
MOM|Multiple of the median (qualifier value)|||C1442163|SNOMEDCT|||  
MOM|metal-on-metal|||||1|0.0542|  
MOM|midecamycin acetate|C1136781|||||1|0.0493|  
MOM|milk of magnesia|C0591789|1|0.114|||||1  
MOM|modifier of Min|||||1  
MOM|mother|C0026591|||||1  
MOM|mucoid otitis media|C0029883|||||1|0.0443|1  
MP|(device) MP||1|0.010|||||  
MP|(drug) MP||1|0.004|||||  
MP|1,7-Dihydro-6H-purine-6-thione;6H-Purine-6-thione, 1,7-dihydro-  
|||C0000618|MSH;NCI;NDFRT;PDQ|||  
MP|1,7-Dihydro-6H-purine-6-thione Monohydrate|||C0000618|NCI;PDQ|||  
MP|3-mercaptopropionic acid|C0000424|||C0000424|MSH;NDFRT|1|0.0091|  
MP|3H-Purine-6-thiol;6 MP;6-MP;6-mp;6MP;6 Mercaptopurine;6 mercaptopurine;6-  
Mercaptopurine;6-mercaptapurine;Mercapto-6-purine;Purine, 6-mercapto-;6  
Thiohypoxanthine;6-Thiohypoxanthine;6 Thiopurine;6 thiopurine;6-Thiopurine;6-  
thiopurine;6-Purinethiol;6-Thioxopurine;6MP -  
Mercaptopurine;MERCAPTOPURINE;Mercaptopurine;mercaptapurine;Mercapurin;Mern|C000  
0618|1|0.214|C0000618|CHV;CSP;LNC;MSH;MTH;MTHSPL;NCI;NDFRT;PDQ;RXNORM;SNOMEDCT;U  
SPMG;VANDF|1|0.0254|  
MP|6-Mercaptopurine [Chemical/Ingredient]|||C0000618|NDFRT|||  
MP|6H-Purine-6-thione, 1,7-dihydro- (9CI)|||C0000618|NCI;PDQ|||  
MP|7-Mercapto-1,3,4,6-tetrazaindene|||C0000618|NCI;PDQ|||  
MP|AP protocol 2;MPH-P protocol;melphalan/prednisone  
protocol|C0284383|||C0284383|MSH;MTH|||  
MP|CQ|C1705968|||C0282245|NCI|||  
MP|L-PAM/PRED|||C0284383|NCI;PDQ|||  
MP|MAURITIUS;Mauritius;mauritius|C0024944|||C0024944|AOD;CHV;LCH;MSH;MTH;NCI;SNO  
MEDCT|||  
MP|MERCAPTOPURINE A 06|||C0000618|MSH|||  
MP|MNP;NORTHERN MARIANA ISLANDS;Northern Mariana  
Islands|C0282245|||C0282245|AOD;MSH;MTH;NCI|||

MP|MP||||C0000618;C0024944;C0282245;C0284383|NCI;PDQ|||  
MP|MU;MUS|C0024944;C0026809;C0347978|||C0024944|NCI|||  
MP|Matching pursuit|||||1|0.0073|  
MP|Mauritius (geographic location)|||C0024944|SNOMEDCT|||  
MP|Melphalan and prednisone;Melphalan/Prednisone;melphalan-  
prednisone;melphalan/prednisone|||C0284383|NCI;PDQ|1|0.0247|  
MP|Mercaptopurine (product)|||C0000618|SNOMEDCT|||  
MP|Mercaptopurine (substance)|||C0000618|SNOMEDCT|||  
MP|Methyl palmoxirate|C0127952|||||1|0.0121|  
MP|Mibelli porokeratosis|C0949506|||||1|  
MP|Mononuclear phagocytes;mononuclear  
phagocyte|C2952444|||C2952444|FMA|1|0.0175|  
MP|Mycoplasma pneumoniae|C0026941;C0032302|||||1|0.0284|  
MP|Purine-6-thiol (8CI)|||C0000618|NCI;PDQ|||  
MP|machine perfusion|||||1|0.0103|  
MP|machine preservation|||||1|  
MP|macrophage;macrophages|C0024432;C1546706;C1550652|||C0024432;C1546706;C155065  
2|AOD;CHV;CSP;FMA;HL7V2.5;HL7V3.0;LCH;LNC;MSH;MTH;NCI;SNOMEDCT|1|0.0066|1  
MP|macular pigment|||||1|0.0193|  
MP|magnetization prepared|||||1|  
MP|main process|||||1|0.0054|  
MP|malignant pyoderma|C0263211|||||1|  
MP|mannoprotein|||||1|0.0097|  
MP|mastoparan|C0065739|||C0065739|MSH|1|0.0139|  
MP|matrix protein|||||1|  
MP|maximum parsimony|||||1|0.0375|  
MP|mean pressure|C0445074|||C0445074|SNOMEDCT|||1|  
MP|mechanical percussion|||||1|  
MP|mechanical percussor|||||1|  
MP|meconium peritonitis|C0270250|||||1|0.0066|  
MP|medial plantar|||||1|  
MP|melting point;melting points|C1881775|||C1881775|NCI|1|0.003|1  
MP|membrane potential|C0025251|||C0025251|AOD;CHV;CSP;MSH;NCI|1|0.0568|1  
MP|membrane protein|C0025252|||C0025252|CHV;CSP;MSH;NCI;NDFRT|||  
MP|menstrual  
period|C0025329;C0025344|1|0.002|C0025329;C0025344|MEDLINEPLUS;NCI|||1|  
MP|mentum posterior|||||1|  
MP|mesangial proliferative||1|0.002|||1|  
MP|mesenteric panniculitis|C0025470|||||1|  
MP|mesial pit|||||1|  
MP|mesiopulpal|||||1|  
MP|metabolic panel||1|0.024|||1|  
MP|metacarpophalangeal||1|0.358||1|0.0471|1|  
MP|metalloproteinase|C0025543|||C0025543;C1150172|CHV;CSP;NCI;SNOMEDCT|1|0.0066|  
MP|metatarsophalangeal||1|0.012|||1|  
MP|metatarsophalangeal||1|0.110||1|0.0103|1|  
MP|metatarsophalangeal/metacarpophalangeal||1|0.210|||1|  
MP|methapyrilene|C0025625|||C0025625|CHV;LNC;MSH;MTH;NCI;NDFRT;RXNORM;SNOMEDCT;V  
ANDF|1|0.0127|  
MP|methyl parathion|C0025709|||C0025709|CHV;LNC;MSH;NDFRT;SNOMEDCT|1|0.0181|  
MP|methyl  
prednisolone;methylprednisolone|C0025815|||C0025815|CHV;CSP;LNC;MSH;MTHSPL;NCI;N  
DFRT;PDQ;RXNORM;SNOMEDCT;USPMG;VANDF|1|0.3305|  
MP|methylphenidate|C0025810|||C0025810|AOD;CHV;CSP;LNC;MSH;MTHSPL;NCI;NDFRT;RXNO  
RM;SNOMEDCT;USPMG;VANDF|1|0.0175|  
MP|methylphosphonate|C0066424|||C0066424|LNC;MSH|1|0.0066|  
MP|methylprednisolone sodium succinate|C0700546|||||1|0.0115|

MP|microfibrillar protein|C0066514|||||1  
 MP|micronized progesterone|C0873071|||C0873071|CHV|1|0.0145|  
 MP|microparticles|||||1|0.0308|  
 MP|microperoxidase|C0066521|||C0066521|MSH|1|0.006|  
 MP|micturition pressure|||||1|0.0048|  
 MP|middle phalanx|C0576463|||C0576463|SNOMEDCT|||1  
 MP|migration percentage|||||1|0.0097|  
 MP|military police||1|0.008|||||  
 MP|millipond|||||1  
 MP|minimal pigment|||||1  
 MP|minipool|||||1  
 MP|mitral prolapse|||||1|0.006|  
 MP|modulator protein|||||1  
 MP|moist pack|||||1  
 MP|monitor pattern|||||1  
 MP|monophasic|C0205186|||||1  
 MP|monophosphate|||||1  
 MP|monopolar|||||1|0.006|  
 MP|motor potential|C0429441|||||1|0.0133|1  
 MP|mouth pressure|||||1  
 MP|mouthpiece|||||1  
 MP|movement protein|||||1|0.0912|  
 MP|mucopolysaccharide|C0017973;C2267150|||C0017973;C2267150|CHV;CSP;NDFRT;SNOMED  
 CT|||1  
 MP|multiparous|C0026751|||C0026751|CHV;SNOMEDCT|||1  
 MP|multiprogrammable pacemaker|||||1  
 MP|muscle potential|||||1  
 MP|muscularis propria|C0225358|||||1|0.0066|  
 MP|mycoplasma pneumoniae pneumonia;mycoplasmal  
 pneumonia|C0032302|||C0032302|CHV;CSP;SNOMEDCT|1|0.003|1  
 MP|myelopeptides|C0067043|||C0067043|MSH|||  
 MP|myeloperoxidase|C0027021;C0440053;C1417245;C2698399|||C0027021;C0440053;C1417  
 245;C2698399|CHV;CSP;HUGO;LNC;MSH;NCI;NDFRT;OMIM;SNOMEDCT|1|0.0085|  
 MP|myenteric plexus|C0027028;C0038564;C1280770|||||1|0.0066|  
 MP|myocardial perfusion|C0428857|||||1|0.0073|1  
 MP|myosin phosphatase|C0067062|||||1|0.0073|  
 MP|peptide|C0030956|||||1|0.0054|  
 MP|peritoneal macrophages|C0206190|||||1|0.0073|  
 MP|proteins|C0033684|||||1|0.0109|  
 MRA|ANGIOGR MR;MR ANGIOGR|||C0243032|MSH|||  
 MRA|Angiographies, MRI;Angiography, MRI;MRI Angiographies;MRI  
 Angiography;Angiographies, Magnetic Resonance;Angiography, Magnetic  
 Resonance;Magnetic Resonance Angiographies;Magnetic Resonance  
 Angiography;Magnetic resonance angiography;Magnetic resonance angiography,  
 NOS;magnetic resonance angiography;Magnetic resonance imaging (MRI) of  
 vessels;Magnetic resonance imaging of vessels;Vascular MRI;Vascular magnetic  
 resonance imaging;magnetic resonance angiography  
 (MRA)|C0243032|||C0243032|CHV;HL7V2.5;MSH;MTH;SNOMEDCT|1|0.6635|1  
 MRA|Immunoglobulin G1, Anti-(Human Interleukin 6 Receptor) (Human-Mouse  
 Monoclonal MRA Heavy Chain), Disulfide with Human-Mouse Monoclonal MRA .Kappa.-  
 Chain, Dimer|||C1609165|NCI|||  
 MRA|MR angiography|||||1|0.2323|  
 MRA|MR arthrography|||||1|0.0048|  
 MRA|MRA;mra|C0243032;C1609165|||C0243032;C1609165|CHV;NCI;SNOMEDCT|||  
 MRA|MRI ANGIOGR|||C0243032|MSH|||  
 MRA|Magnetic resonance angiography (procedure)|||C0243032|SNOMEDCT|||  
 MRA|Magnetic resonance imaging of vessels (procedure)|||C0243032|SNOMEDCT|||

MRA|Multiple regression analysis|||||1|0.015|  
MRA|TOCILIZUMAB;Tocilizumab;tocilizumab;atlizumab;monoclonal antibody,  
MRA|C1609165|||C1609165|MSH;MTH;MTHSPL;NCI;NDFRT;RXNORM;SNOMEDCT;VANDF|||  
MRA|Tocilizumab (product)|||C1609165|SNOMEDCT|||  
MRA|Tocilizumab (substance)|||C1609165|SNOMEDCT|||  
MRA|Vascular MRI (procedure)|||C0243032|SNOMEDCT|||  
MRA|Vascular magnetic resonance imaging (procedure)|||C0243032|SNOMEDCT|||  
MRA|activity|C0026606;C0205177;C0439167;C0441655;C1561536|||||1|0.0095|  
MRA|magnetic resonance angiogram|||||1|0.0082|1  
MRA|magnetic resonance angiograph||1|1.000|||||1  
MRA|magnetic resonance angiographic|||||1|0.0068|  
MRA|magnetic resonance arteriograph|||||1|1  
MRA|magnetic resonance arteriography|||||1|0.0061|1  
MRA|magnetic resonance arteriogram|||||1|1  
MRA|magnetic resonance arthrography|||||1|0.0095|  
MRA|main renal artery|||||1|1  
MRA|malignant rheumatoid arthritis|||||1|0.0095|  
MRA|marrow repopulating ability|||||1|0.0136|  
MRA|marrow repopulation activity|||||1|1  
MRA|mesenteric resistance arteries|||||1|0.0123|  
MRA|midright atrium|||||1|1  
MRA|multivariate regression analysis|||||1|1  
MRA|risk assessment|C0086930|||||1|0.0089|  
MRCP|Cholangiopancreatographies, Magnetic Resonance;Cholangiopancreatography,  
Magnetic Resonance;Magnetic Resonance Cholangiopancreatographies;Magnetic  
Resonance Cholangiopancreatography;Magnetic resonance  
cholangiopancreatography;magnetic resonance cholangiopancreatography;MAGNETIC  
RESONANCE CHOLANGIOPANCREATOGRAPHY (MRCP);MRCP - Magnetic resonance  
cholangiopancreatography|C0994163|||C0994163|HCPCS;MSH;SNOMEDCT|1|0.6294|1  
MRCP|MR cholangiopancreatography|||||1|0.2912|  
MRCP|Magnetic resonance cholangiography|||||1|0.0206|  
MRCP|Magnetic resonance cholangiopancreatography  
(procedure)|||C0994163|SNOMEDCT|||  
MRCP|magnetic resonance cholangiopancreatograph||1|1.000|||||1  
MRCP|mental retardation, cerebral palsy|||||1|1  
MRCP|movement-related cortical potential;movement-related cortical  
potentials|||||1|0.0588|1  
MRCP|mrcp|||C0994163|HCPCS|||  
MRI|Imaging, Magnetic Resonance;Magnetic Resonance Imaging;Magnetic resonance  
imaging;Magnetic resonance imaging, NOS;magnetic resonance images;magnetic  
resonance imaging;MRI - Magnetic resonance imaging;magnetic resonance imaging  
(MRI)|C0024485;C1552358|1|1|C0024485;C1552358|AOD;CCS;CHV;CSP;HL7V3.0;LCH;MEDLIN  
EPLUS;MSH;MTH;NCI;PDQ;SNOMEDCT|1|0.9931|1  
MRI|Imaging, NMR;NMR Imaging;nmr imaging;MR - Magnetic resonance;MR  
Tomography;Tomography, MR;MRI;MRI, NOS;Magnetic Resonance Imaging Scan;Magnetic  
resonance imaging scan;Magnetic resonance imaging - action;Magnetic resonance  
study;Magnetic resonance technique;NMR - Nuclear magnetic resonance;NMR  
Tomography;Tomography, NMR;Nuclear Magnetic Resonance Imaging;imaging magnetic  
nuclear resonance;nuclear magnetic resonance  
imaging;Zeugmatography|C0024485|||C0024485|AOD;CHV;CSP;LNC;MSH;NCI;SNOMEDCT|1|0.  
0004|  
MRI|MR TOMOGR;TOMOGR MR|||C0024485|MSH|||  
MRI|MRI Scan;MRI Scans|C0024485;C0917711|||C0024485|MEDLINEPLUS;NCI|||  
MRI|Magnetic resonance imaging (procedure)|||C0024485|SNOMEDCT|||  
MRI|Magnetic resonance imaging - action (qualifier  
value)|||C0024485|SNOMEDCT|||  
MRI|Magnetic resonance study (procedure)|||C0024485|SNOMEDCT|||

MRI|Magnetic resonance: [imaging] or [study]|||C0024485|SNOMEDCT|||  
MRI|Magnetic resonance: [imaging] or [study] (procedure)|||C0024485|SNOMEDCT|||  
MRI|Medical Imaging, Magnetic Resonance / Nuclear Magnetic  
Resonance|||C0024485|NCI|||  
MRI|NMR|C0024485;C0028580|||C0024485|CSP;MEDLINEPLUS;PDQ|||  
MRI|NMR Scan|||C0024485|SNOMEDCT|||  
MRI|NMR TOMOGR;TOMOGR NMR|||C0024485|MSH|||  
MRI|NMRI|C0024485;C1513846|||C0024485|NCI|||  
MRI|Nuclear magnetic resonance;Nuclear magnetic resonance NOS;nuclear magnetic  
resonance|C0024485;C0028580;C1547989|||C0024485|MEDLINEPLUS;PDQ;SNOMEDCT|||  
MRI|Nuclear magnetic resonance NOS (procedure)|||C0024485|SNOMEDCT|||  
MRI|Research Institute|C0035172|||1|0.0005|  
MRI|ZEUGMATOGR|||C0024485|MSH|||  
MRI|machine-readable identifier|||1|  
MRI|magnetic resonance|C0028580;C0917874;C1551403|||1|0.004|  
MRI|magnetic resonance imagery|||1|0.0006|  
MRI|magnetic resonance tomography|||1|0.0013|  
MRI|medical records information|||1|  
MRI|moderate renal insufficiency|||1|  
MR|ALDOSTERONE RECEPTOR;Aldosterone  
Receptor|C0051133;C0066563|||C0066563;C1417835|NCI;OMIM|||  
MR|HISTIOCYTOMA, GIANT CELL|C0035290;C0311284|||C0311284|DXP|||  
MR|LIPOID DERMATOARTHRITIS;Lipoid dermatoarthritis;lipoid  
dermatoarthritis;MRH;Multicentric Reticulohistiocytosis;Multicentric  
reticulohistiocytosis;multicentric reticulohistiocytosis;Nicolau-Balus  
syndrome;RETICULOHISTIOCYTOMA,  
MULTICENTRIC|C0311284|||C0311284|CHV;DXP;MTH;MTHICD9;NCI;SNOMEDCT|1|0.0015|1  
MR|Lipoid dermatoarthritis (disorder)|||C0311284|SNOMEDCT|||  
MR|MAURITANIA;Mauritania;mauritania|C0024943|||C0024943|AOD;CHV;LCH;MSH;MTH;NCI;  
SNOMEDCT|||  
MR|MCR;MLR|C0066563;C1417835;C1705928|||C0066563;C1417835|NCI;OMIM|||  
MR|MINERALOCORTICOID RECEPT;RECEPT MINERALOCORTICOID;RECEPT  
MINERALOCORTICIDS|||C0066563|MSH|||  
MR|MINERALOCORTICOID RECEPTOR;Mineralocorticoid Receptor;Mineralocorticoid  
Receptors;Mineralocorticoids Receptors;Receptor, Mineralocorticoid;Receptors,  
Mineralocorticoid;Receptors, Mineralocorticoids;mineralocorticoid  
receptor;NUCLEAR RECEPTOR SUBFAMILY 3, GROUP C, MEMBER 2;Nuclear Receptor  
Subfamily 3 Group C Member 2;nuclear receptor subfamily 3, group C, member  
2|C0066563;C1417835|||C0066563;C1417835|CSP;HUGO;MSH;MTH;NCI;NDFRT;OMIM|1|0.0339  
|1  
MR|MR|C2347167|||C0024943;C0066563;C0311284;C1417835;C1996908|DXP;HUGO;LNC;NCI;O  
MIM|||  
MR|MR (in LOINC)|||C1996908|MTH|||  
MR|MRT|C0024943;C2949870|||C0024943|NCI|||  
MR|Maddox rod|||1|  
MR|Maillard reaction|C0024495|||1|0.0007|  
MR|Maudsley Reactive|||1|0.0016|  
MR|Mauritania (geographic location)|||C0024943|SNOMEDCT|||  
MR|Menstrual regulation;menstrual regulation|C0025335|||1|0.0014|1  
MR|Mental Rotation|||1|0.0008|  
MR|Moro reflex|C0234173|||1|  
MR|Multicentric reticulohistiocytosis (disorder)|||C0311284|SNOMEDCT|||  
MR|NR3C2|||C0066563;C1417835|HUGO;NCI;OMIM|||  
MR|NR3C2 Gene;NR3C2 gene;Nuclear Receptor Subfamily 3, Group C, Member 2  
Gene|C1417835|||C1417835|HUGO;MTH;NCI|||  
MR|Receptors, Mineralocorticoid [Chemical/Ingredient]|||C0066563|NDFRT|||  
MR|macrophage mannose receptor|C1417249|||1|0.0008|

MR|magnetic  
resonance|C0028580;C0917874;C1551403|1|0.628|C0028580;C0917874;C1551403|CHV;HL7V  
3.0;MSH;MTH;NCI|1|0.7672|1  
MR|magneto-resistance|1|0.0008|  
MR|malar rash|C0277942|1|0.0009|  
MR|mandelate racemase|C0065635|1|0.0009|  
MR|mandible ramus|1|0.0009|  
MR|mandibular reflex|1|0.0009|  
MR|manifest refraction|C1301318|1|0.0023|1  
MR|mannose-resistant|1|0.0023|1  
MR|maximal right|1|0.0023|1  
MR|may repeat|1|0.0023|1  
MR|measles-rubella|1|0.0023|1  
MR|medial rectus|C0224130;C0582820|1|0.0022|1  
MR|medial rotation|C0231459|1|0.0022|1  
MR|median raphe|1|0.0021|1  
MR|median raphe nucleus|C0228432|1|0.0024|  
MR|medical record|C0025102|1|0.002|C0025102|CHV;CSP;MSH;NCI;SNOMEDCT|1|1  
MR|medical rehabilitation|C0034991|1|0.002|1  
MR|medication responder|1|0.002|1  
MR|medium range|1|0.002|1  
MR|megaroentgen|1|0.002|1  
MR|mental  
retardation|C0025362|1|0.006|C0025362|AOD;CCS;CHV;COSTAR;CSP;CST;DXP;ICPC;LCH;LN  
C;MEDLINEPLUS;MSH;MTH;NCI;NDFRT;OMIM;QMR;SNOMEDCT|1|0.0234|1  
MR|mentally retarded|C0079822|1|0.0032|1  
MR|mesencephalic raphe|1|0.0032|1  
MR|metabolic rate|C0870882|1|0.0079|1  
MR|metabolic ratio|1|0.0072|1  
MR|methemoglobin  
reductase|C0025636;C1412802|1|0.0008|C0025636;C1412802|MSH;MTH;OMIM|1|1  
MR|methicillin-resistant|C1955827|1|0.002|1  
MR|methyl red|C0066279|1|0.0009|1  
MR|milk replacer|1|0.0009|1  
MR|milk ring|1|0.0009|1  
MR|milliroentgen|1|0.0009|1  
MR|minor responses|1|0.001|1  
MR|mitochondria-rich|1|0.0039|1  
MR|mitotic rate|1|0.0017|1  
MR|mitral reflux|1|0.0017|1  
MR|mitral  
regurgitation|C0026266|1|0.352|C0026266|CHV;COSTAR;CSP;DXP;MSH;MTH;NCI;NDFRT;OMI  
M;SNOMEDCT|1|0.0578|1  
MR|mixed respiratory|1|0.0578|1  
MR|moderate resistance|1|0.0578|1  
MR|modified release|C1709058|1|0.0022|1  
MR|modulation rate|1|0.0022|1  
MR|molecular weight|1|0.0039|1  
MR|molecular remission|1|0.0008|1  
MR|molecular replacement|1|0.0007|1  
MR|molecular size|C0596969|1|0.0005|1  
MR|molecular weight|C0026385|1|0.0325|1  
MR|morbid risk|1|0.0004|1  
MR|morphinone reductase|C0255930|1|0.0005|1  
MR|mortality  
rate|C0026565;C0205848|1|0.0022|1  
MR|mortality ratio|1|0.0017|1

MR|mother-reared|||||1|0.001|  
MR|motivation research|||||1|  
MR|multiplication rate|||||1|  
MR|multiplicity reactivation|||||1|  
MR|multiresistant|||||1|0.0008|  
MR|muscle receptor|||||1|  
MR|muscle relaxant|C0358430;C2911818|||C0358430;C2911818|CHV;CSP;NCI;NDFRT|||1|  
MR|myocardial revascularization|C0027056|||C0027056|AOD;CHV;LCH;MSH;SNOMEDCT|||1|  
MR|myotactic reflex|||||1|  
MR|relative molecular mass|||||1|0.0238|1|  
MR|resistance|C0237834;C1514892|||||1|0.0014|  
MRSA|Carrier or suspected carrier of Methicillin resistant Staphylococcus aureus|||C2350012|ICD9CM|||  
MRSA|Encounter due to methicillin resistant Staphylococcus aureus;Personal history of Methicillin resistant Staphylococcus aureus|C2350012|||C2350012|ICD9CM;MTH|||  
MRSA|Hx Methicln resist Staph|||C2350012|ICD9CM|||  
MRSA|Infection due to Methicillin resistant Staphylococcus aureus;MRSA - Methicillin resistant Staphylococcus aureus infection;methicillin-resistant staphylococcus aureus (MRSA) infection;MRSA infection;mrsa infection;Methicillin resistant Staphylococcus aureus infection;Methicillin-resistant staphylococcus aureus infection|C0343401|||C0343401|CHV;MTH;SNOMEDCT|||  
MRSA|METHICILLIN RESISTANT STAPH AUREUS|||C1265292|MSH|||  
MRSA|MRSA|C0343401;C1265292;C2350012|||C0343401;C1265292;C2350012|CHV;CSP;MEDLIN EPLUS;MSH;MTHICD9;SNOMEDCT|||  
MRSA|MRSA - Methicillin-resistant staphylococcus aureus;methicillin resistant staphylococcus aureus (MRSA);Methicillin Resistant Staphylococcus Aureus;Methicillin resistant Staphylococcus aureus;Methicillin resistant staphylococcus aureus;Methicillin-Resistant Staphylococcus aureus;Methicillin-resistant Staphylococcus aureus;Methicillin-resistant staphylococcus aureus;Staphylococcus aureus.methicillin resistant;methicillin resistant Staphylococcus aureus;methicillin-resistant Staphylococcus aureus|C0343401;C1265292|1|1|C0343401;C1265292|CHV;CSP;LNC;MEDLINEPLUS;MSH;MTHIC D9;SNOMEDCT|1|0.9512|1|  
MRSA|Meth resis Staph carrier|||C2350012|ICD9CM|||  
MRSA|Methicillin resistant Staphylococcus aureus (organism)|C1265292|||C1265292|MTH;SNOMEDCT|||  
MRSA|Methicillin resistant Staphylococcus aureus infection (disorder);Methicillin-resistant staphylococcus aureus infection (disorder)|||C0343401|SNOMEDCT|||  
MRSA|Methicillin-resistant S aureus|||||1|0.0072|  
MRSA|Methicillin-resistant Staphylococcus aureus strains|||||1|0.003|  
MRSA|methicillin-resistant;resistant to methicillin|C1955827|||||1|0.0335|  
MRSA|methicillin-resistant strains|||||1|0.0051|  
MS|(drug) MS;medical student|C0038495|1|0.004|||||  
MS|5-@METHYLTETRAHYDROFOLATE-HOMOCYSTEINE S-METHYLTRANSFERASE;5-methyltetrahydrofolate-homocysteine methyltransferase;METHIONINE SYNTHASE;methionine synthase;TETRAHYDROPTEROYLGLUTAMATE METHYLTRANSFERASE|C0039676;C1417453|||C0039676;C1417453|CHV;CSP;HUGO;MSH;NDFRT;O MIM;SNOMEDCT|1|0.005|  
MS|ANAL MASS SPECTRUM;MASS SPECTRUM ANAL;SPECTRUM ANAL MASS|||C0037813|MSH|||  
MS|Analyses, Mass Spectrum;Mass Spectrum Analyses;Spectrum Analyses, Mass;Analysis, Mass Spectrum;Mass Spectrum Analysis;Spectrum Analysis, Mass;mass spectrum analysis;MASS SPECTROMETRY;Mass Spectrometry;Mass spectrometry;Spectrometry, Mass;mass spectrometry;Mass Spec;Mass Spectroscopy;Spectroscopy, Mass;mass spectroscopy;Mass Spectrum;Mass spectrometry measurement;Mass spectrometry measurement, NOS;Mass spectroscopy

measurement;Mass spectroscopy measurement, NOS;mass spectrography|C0037813|||C0037813|AOD;CHV;CSP;LCH;MSH;MTH;NCI;PDQ;SNOMEDCT|1|0.0967|1

MS|Chinese Meishan|||||1|0.0008|

MS|DISSEMINATED SCLEROSIS;Disseminated Sclerosis;Disseminated sclerosis;SCLEROSIS, DISSEMINATED;Sclerosis, Disseminated;disseminated sclerosis|C0026769;C1868685|||C0026769;C1868685|CHV;CSP;DXP;MSH;NDFRT;OMIM;SNOME DCT|||

MS|DS - Disseminated sclerosis;Generalised multiple sclerosis;Generalized multiple sclerosis;SCLEROSIS, INSULAR;insular sclerosis|C0026769|||C0026769|CHV;CSP;DXP;SNOMEDCT|||

MS|Generalized multiple sclerosis (disorder)|||C0026769|SNOMEDCT|||

MS|M.S.|C0369637;C0441923;C1553034|||C1513009|NCI|||

MS|MASS SPECTROMETER, CLINICAL USE;Mass Spectrometer;mass spectrometer;Mass Spectrometers (device)|C0183396|||C0183396|CHV;MTH;NCI;SPN|1|0.0042|

MS|MH|||C0026514|NCI|||

MS|MITRAL STENOSIS;Mitral Stenosis;Mitral stenosis;STENOSIS, MITRAL;Stenosis, Mitral;mitral stenosis;MITRAL VALVE STENOSIS;MITRAL VALVE, STENOSIS;Mitral Valve Stenosis;Mitral valve stenosis;Mitral valve stenosis, NOS;Stenosis, Mitral Valve;Valve Stenosis, Mitral;mitral valve stenosis|C0026269;C0264766|1|0.002|C0026269;C0264766|CHV;COSTAR;CSP;DXP;ICD9CM;M SH;MTH;NCI;NDFRT;OMIM;QMR;SNOMEDCT|1|0.0243|1

MS|MONTSERRAT;Montserrat;Montserrat island|C0026514|||C0026514|AOD;MSH;MTH;NCI;SNOMEDCT|||

MS|MS;Ms;Ms.;ms|C2349943|||C0025867;C0026221;C0026269;C0026514;C0026769;C0037813 ;C0183396;C0439223;C1417325;C1417453;C1513009;C1552156;C1868685;C1881819;C234994 3|CHV;CSP;DXP;HL7V3.0;HUGO;MEDLINEPLUS;MSH;NCI;OMIM;SNOMEDCT|||

MS|MS (Multiple Sclerosis);MS - Multiple sclerosis;MS multiple sclerosis;multiple sclerosis (MS);multiple sclerosis MS;MULTIPLE SCLEROSIS;Multiple Sclerosis;Multiple sclerosis;Multiple sclerosis NOS;Multiple sclerosis, NOS;SCLEROSIS MULTIPLE;SCLEROSIS, MULTIPLE;Sclerosis, Multiple;multiple sclerosis;multiplesclerosis|C0026769;C1417325|1|0.414|C0026769;C1417325|AOD;CCS;CHV;COSTAR;CSP;CST ;DXP;HUGO;ICD9CM;ICPC;LCH;LNC;MEDLINEPLUS;MSH;MTH;NCI;NDFRT;QMR;SNOMEDCT|1|0.737 |1

MS|MS - Mitral stenosis;Mitral Stenoses;Stenoses, Mitral;Mitral Valve Stenoses;Stenoses, Mitral Valve;Valve Stenoses, Mitral|C0026269|||C0026269|MSH;SNOMEDCT|||

MS|MS gene|C1417325|||C1417325|HUGO;MTH|||

MS|MS1|C1417325;C1868685|||C1417325;C1868685|HUGO;OMIM|||

MS|MSR|C0026514;C1417458;C1826541|||C0026514|NCI|||

MS|MTR;MTR gene;cb1G|C1417453|||C1417453|HUGO;MTH;OMIM|||

MS|MULTIPLE SCLEROSIS, SUSCEPTIBILITY TO|C1868685|||C1868685|MTH;OMIM|||

MS|MULTIPLE SCLEROSIS, SUSCEPTIBILITY TO, 1|||C1868685|OMIM|||

MS|Manchester Scale|||||1|0.0005|

MS|Mass spectrometry (procedure)|||C0037813|SNOMEDCT|||

MS|Mass spectrometry measurement (procedure)|||C0037813|SNOMEDCT|||

MS|Master of Science;master of science|C1513009|1|0.006|C1513009|HL7V2.5;MTH;NCI|||

MS|Maternal serum|||||1|0.0042|

MS|Meal size|||||1|0.0006|

MS|Mean sensitivity|||||1|0.0027|

MS|Meckel syndrome|C0265215|||||1|

MS|Mental Stress|C0038443|||||1|0.0013|

MS|Metric System;Metric Systems;Metric system;System, Metric;Systems, Metric;metric system|C0025867|||C0025867|CHV;LCH;MSH;MTH;NCI|||

MS|Microbiology Susceptibility;Microbiology Susceptibility  
Domain|C1881819|||C1881819|MTH;NCI|||  
MS|Millisecond;millisecond;milliseconds;Msec;msec;millisecond  
(ms)|C0439223|||C0439223|CHV;MTH;NCI;SNOMEDCT|1|0.0029|1  
MS|Mississippi;mississippi;Mississippi (geographic  
location)|C0026221|||C0026221|AOD;CHV;LCH;MSH;MTH;NCI;SNOMEDCT|||  
MS|Mitral Valve Stenosis [Disease/Finding]|||C0026269|NDFRT|||  
MS|Mitral valve stenosis (disorder)|||C0026269|SNOMEDCT|||  
MS|Montserrat island (geographic location)|||C0026514|SNOMEDCT|||  
MS|Ms. - Title|C2349943;C1519530;C1704446;C1705823;C1705824|||C2349943|MTH|||  
MS|Multiple Sclerosis [Disease/Finding]|||C0026769|NDFRT|||  
MS|Multiple sclerosis (disorder);Multiple sclerosis NOS  
(disorder)|||C0026769|SNOMEDCT|||  
MS|Murashige and Skoog;Murashige-Skoog|||1|0.0063|  
MS|Mycoplasma synoviae|C0317810|||1|0.0045|  
MS|Photometry/Spectrum Analysis, Mass|||C0037813|NCI|||  
MS|Supernumerary mandibular left primary canine|C1552156|||C1552156|MTH|||  
MS|duration|C0449238;C2926735|||1|0.0007|  
MS|interval|C1272706;C1552654;C1552713|||1|0.0008|  
MS|magnetic source|||1|0.0008|  
MS|magnetic stimulation|||1|0.0021|  
MS|main scale|||1|  
MS|mainstream|C0024500|||C0024500|CHV|1|0.0025|  
MS|mainstream smoke|||1|0.0015|  
MS|maladjustment score|||1|  
MS|malate synthase|C0024545|||C0024545|CSP;MSH;MTH;NDFRT;SNOMEDCT|||  
MS|malignant Schwannoma;malignant  
schwannoma|C0751690|||C0751690|CHV;MSH;NCI;OMIM;SNOMEDCT|1|0.0006|  
MS|mannose-sensitive|||1|0.0032|1  
MS|manuscript|C0600659|||C0600659|AOD;CHV;NCI|||1  
MS|marbling score|||1|0.0007|  
MS|marijuana smokers|||1|0.0005|  
MS|mass screening|C0024870|||1|0.0013|  
MS|mass spectral|||1|0.0007|  
MS|mass spectrometric|||1|0.0116|  
MS|mass spectrophotometer|||1|  
MS|maternal separation|||1|0.0017|  
MS|maxillary sinus|C0024957;C1278899|||1|  
MS|mean score|||1|  
MS|mechanical stimulation|C1285354|||1|  
MS|mechanosensitive|||1|0.0038|  
MS|medial septal|||1|0.0032|  
MS|medial septal nucleus|C0175233|||1|0.0016|  
MS|medial septum|||1|0.008|  
MS|median sternotomy|C1282959|||1|0.0008|1  
MS|median survival|||1|0.0038|  
MS|medical services|C0587569|||1|  
MS|medical supply|C0740043|||1|  
MS|medical survey|||1|  
MS|medical-surgical|C1552239;C1555987|||1|  
MS|medium|C0009458;C0439536;C1705217|||1|0.001|  
MS|melanonychia striata|C1142305|||1|  
MS|menopausal syndrome|C0025319|||1|  
MS|mental status|C0278060|||1|  
MS|metabolic syndrome|C0524620;C0948265|||1|0.0134|1  
MS|methionine synthetase|C0039676|||C0039676|CHV;MSH;NDFRT|1|0.0009|  
MS|methyl salicylate|C0066282|||1|0.0008|

MS|microsatellite|C1519302|||C1519302|CHV;MSH;NCI|1|0.0038|  
MS|microscope slide|C0026017|||1|0.0008|  
MS|microsphere;microspheres|C0026032|||C0026032|CHV;CSP;LCH;MSH;NCI|1|0.0092|  
MS|middle suprasylvian|||1|0.0008|  
MS|mild steel|||1|0.0012|  
MS|milkshake|||1|  
MS|mineralizing surface|||1|0.0007|  
MS|minimal support|||1|  
MS|mitral sound|||1|  
MS|mobile surgical|||1|  
MS|modal sensitivity|||1|  
MS|moderately susceptible|C0442815|||1|  
MS|molar solution|||1|  
MS|molar substitution|||1|0.0005|  
MS|mongolian spot|C0265985|||1|  
MS|morning stiffness|C0457086|||1|  
MS|morphine|C0026549;C2698261|||1|0.0014|  
MS|morphine  
sulfate|C0066814|1|0.558|C0066814|CHV;MSH;MTH;MTHSPL;NCI;NDFRT;PDQ;RXNORM;SNOMED  
CT;USPMG;VANDF|1|0.0071|1|  
MS|motile sperm|||1|  
MS|motion  
sickness|C0026603|||C0026603|AOD;CHV;COSTAR;DXP;ICD9CM;LCH;MEDLINEPLUS;MSH;MTH;N  
CI;NDFRT;OMIM;SNOMEDCT|1|0.0028|  
MS|ms (qualifier value)|||C0439223|SNOMEDCT|||  
MS|mucosal-to-serosal|||1|0.0008|  
MS|mucosubstance|||1|  
MS|multilaminated structure|||1|  
MS|multiple sclerosis|||C0026769|CHV|||  
MS|multiple sclerosis|||1|0.0008|  
MS|multiple-scattering|||1|0.0008|  
MS|multiples sclerosis|||C0026769|CHV|||  
MS|murmurs|C0018808|||1|  
MS|muscle shortening|C0185423|||1|  
MS|muscle spasm|C0037763|||1|  
MS|muscle strength|C0517349|||1|  
MS|musculoskeletal|C0497254;C2707260|1|0.004|||1|  
MS|mutans streptococci|||1|0.0115|  
MS|mutator strain|||1|0.0006|  
MS|myasthenic syndrome|C0022972;C0549225|||1|  
MS|myeloid sarcoma|C0152276|||1|  
MS|strength|C0237897;C0808080;C1705922|||1|0.0008|  
MSSA|Encounter due to Methicillin susceptible Staphylococcus  
aureus|C2355591|||C2355591|MTH|||  
MSSA|MSSA;Methicillin susceptible Staphylococcus aureus;methicillin-susceptible  
Staphylococcus  
aureus|C1635274;C2355591|1|0.164|C1635274;C2355591|ICD9CM;MTHICD9;SNOMEDCT|1|0.3  
333|1|  
MSSA|Meth susc Staph carrier|||C2355591|ICD9CM|||  
MSSA|Methicillin susceptible Staphylococcus aureus  
(organism)|C1635274|||C1635274|MTH;SNOMEDCT|||  
MSSA|Methicillin-susceptible S aureus|||1|0.0133|  
MSSA|methicillin-sensitive|||1|0.0733|  
MSSA|methicillin-sensitive S aureus|||1|0.04|  
MSSA|methicillin-sensitive Staphylococcus aureus|||1|0.38|  
MSSA|methicillin-susceptible|||1|0.16|  
MSSA|modified selective severity assessment|||1|0.836|||

MTP|ABL|||C1826328|HUGO|||  
MTP|D-Glucose, 4-O-alpha-D-glucopyranosyl-, tetrahexadecanoate;Maltose tetrapalmitate;maltose tetrapalmitate;maltose tetrapalmitate (MTP)|C0065610||C0065610|CHV;MSH;MTH;SNOMEDCT|1|0.0443|  
MTP|MICROSOMAL TRIGLYCERIDE TRANSFER PROTEIN, 88-KD;MTP, LARGE SUBUNIT;MTTP gene|C1826328||C1826328|HUGO;MTH;OMIM|||  
MTP|MTP|C0065610;C1826328||C0065610;C1826328|OMIM;SNOMEDCT|||  
MTP|MTTP|C0069187;C1538010;C1826328||C1826328|HUGO;OMIM|||  
MTP|Maltose tetrapalmitate (substance)|||C0065610|SNOMEDCT|||  
MTP|Treatment Project|||||1|0.0285|  
MTP|first metatarsophalangeal|||||1|0.0823|  
MTP|master treatment plan|||||1|  
MTP|maximal tolerated pressure|||||1|  
MTP|medial tibial plateau|||||1|  
MTP|median time to progression|||||1|0.0222|  
MTP|median time to tumor progression|||||1|0.0222|  
MTP|medical termination of pregnancy|C3146282|||||1|0.0443|1|  
MTP|mesencephalic tegmental paralysis|C0455715|||||1|  
MTP|metatarsal periostitis|||||1|  
MTP|metatarsophalangeal||1|1.000||||1|  
MTP|microsomal triglyceride transfer protein|C0207079;C1826328||C0207079;C1826328|HUGO;MSH;MTH|1|0.6203|1|  
MTP|microtubule protein;microtubule proteins|C0026042|||||1|0.0158|1|  
MTP|mitochondrial permeability transition pore|C0908146;C2000322||C0908146|MSH;MTH|1|0.057|  
MTP|mitochondrial transmembrane potential|||||1|0.0633|  
MTP|multidisciplinary treatment plan|||||1|  
MUGA|MUGA;MUGA - Multiple-gated acquisition;MUGA Scan;MUGA scan;muga scan;muga scans;scan muga;Multi-Gated Acquisition Scan;Multiple gated acquisition scanning;Multiple gated acquisition scanning, NOS;acquisition gated multiple scanning;multiple gated acquisition scan;Radionuclide Ventriculogram Scan|C0521317||C0521317|CHV;NCI;SNOMEDCT|||  
MUGA|MUGA - Multiple-gated acquisiton|||C0521317|SNOMEDCT|||  
MUGA|Multiple gated acquisition;multiple gated acquisition||1|1|||1|0.4074|1|  
MUGA|Multiple gated acquisition scanning (procedure)|||C0521317|SNOMEDCT|||  
MUGA|multigated angiogram|||||1|  
MUGA|radionuclide angiography|C0034604|||||1|0.2222|  
MUGA|radionuclide ventriculography|C0034610|||||1|0.3704|  
MVA|AVM protocol;doxorubicin/mitomycin/vinblastine protocol|C0052712||C0052712|MSH;MTH|||  
MVA|DOX/MITO/VBL|||C0052712|NCI;PDQ|||  
MVA|Doxorubicin/Mitomycin/Vinblastine;doxorubicin/mitomycin/vinblastine|||C0052712|NCI;PDQ|||  
MVA|Instability mitotic non disjunction syndrome;MOSAIC VARIEGATED ANEUPLOIDY SYNDROME;Mosaic variegated aneuploidy syndrome;MVA SYNDROME|C1850343||C1850343|MSH;MTH;OMIM|||  
MVA|MOTOR VEHICLE ACCIDENT;Motor vehicle accident;motor vehicle accident|C0000932;C1553508;C2939181|1|0.986|C0000932;C1553508;C2939181|CHV;COSTA R;HL7V3.0;MTH;SNOMEDCT|1|0.1809|1|  
MVA|MOTOR VEHICLE TRAFFIC ACCIDENTS;Motor vehicle traffic accident;Motor vehicle traffic accident NOS;MVA - Motor vehicle accident;MVTA - Motor vehicle traffic accident|C2939181||C2939181|ICD9CM;SNOMEDCT|||  
MVA|MVA|C0052712;C1850343;C2939181||C0052712;C1850343;C2939181|NCI;OMIM;PDQ;SNO MEDCT|||  
MVA|Modified vaccinia Ankara|||||1|0.0589|  
MVA|Modified vaccinia virus Ankara;modified vaccinia virus Ankara|||||1|0.187|1|  
MVA|Motor vehicle accident (event)|||C2939181|SNOMEDCT|||

MVA|Motor vehicle collision NOS|C0000932|||C2939181|SNOMEDCT|||  
MVA|Motor vehicle collision NOS (event)|||C2939181|SNOMEDCT|||  
MVA|Motor vehicle collision NOS (finding)|||C2939181|SNOMEDCT|||  
MVA|Motor vehicle traffic accident (event);Motor vehicle traffic accident NOS  
(event)|||C2939181|SNOMEDCT|||  
MVA|Motor vehicle traffic accident (finding);Motor vehicle traffic accident NOS  
(finding)|||C2939181|SNOMEDCT|||  
MVA|Multivariate analysis;multivariate  
analysis|C0026777|||C0026777|AOD;CHV;MSH|1|0.0366|  
MVA|RTA - motor vehicle|||C2939181|SNOMEDCT|||  
MVA|car/truck accident|||C2939181|AOD|||  
MVA|malignant ventricular arrhythmia|||1|1|  
MVA>manual vacuum aspiration|||1|0.0874|1|  
MVA|mechanical ventricular assistance|||1|1|  
MVA|mevalonate|C0677647|||C0677647|CHV;CSP;LNC;MSH;SNOMEDCT|1|0.0874|  
MVA|mevalonic acid|C0025879|||1|0.1037|1|  
MVA|microvascular angina|C0206064|||C0206064|CHV;MSH;NDFRT|||  
MVA|microvascular angiopathy|||1|1|  
MVA|microvillus atrophy|||1|1|  
MVA|mitral valve area|C0428818|||C0428818|SNOMEDCT|1|0.2581|1|  
MVI|malignant vascular injury|||1|1|  
MVI|mitral valve insufficiency|C0026266|||1|1|  
MVI|motor vehicle injury|C1318747|||1|1|  
MVI|multi vitamin|1|1.000|||1|1|  
MVI|multiple vitamin injection|||1|1|  
MVI|multivalvular involvement|||1|1|  
MVI|multivitamin infusion|||1|1|  
N0|Lymph Node Stage N0;N0 Lymph Node Stage;N0;N0 Cancer Stage Finding;N0 Lymph  
Node Finding;N0 Node Finding;N0 Node Stage;Node Stage N0;Node stage N0;N0  
Regional Lymph Node Stage Finding;N0 Stage;N0 stage;N0 Stage Finding;N0 stage  
(finding);N0 TNM Finding;N0 category|C0441959|||C0441959|MTH;NCI;SNOMEDCT|||  
N0|N0 Regional Lymph Nodes Finding|||C0441959|NCI|||  
N0|N0 category (finding)|||C0441959|SNOMEDCT|||  
N0|N0 stage (tumor staging)|||C0441959|SNOMEDCT|||  
N0|N0|C1298908;C1549444|||C0441959|SNOMEDCT|||  
N0|Node stage N0 (tumor staging)|||C0441959|SNOMEDCT|||  
N0|clinically negative|||1|0.1875|  
N0|clinically negative neck|||1|0.125|  
N0|lymph node involvement|C0806692|||1|0.1042|  
N0|no lymph nodes containing cancer cells|1|1.000|||1|1|  
N0|node-negative|C0279781;C0678034|||C0279781;C0678034|CHV;NCI|1|0.5833|  
NAD|.Beta.-NAD;Adenine Dinucleotide, Dihydronicotinamide;Dihydronicotinamide  
Adenine Dinucleotide;Dinucleotide, Dihydronicotinamide  
Adenine;dihydronicotinamide adenine dinucleotide;Co-I;Codehydrogenase I;Coenzyme  
I;Cozymase;DPN;Dinucleotide, Nicotinamide-Adenine;Nicotinamide Adenine  
Dinucleotide;Nicotinamide adenine dinucleotide;Nicotinamide-Adenine  
dinucleotide;nicotinamide adenine dinucleotide;nicotinamide-adenine  
dinucleotide;Diphosphopyridine Nucleotide;Nucleotide,  
Diphosphopyridine;NAD;NAD+;nad;NADIDE;Nadide;Nicotinamide adenine dinucleotide  
(NAD);nicotinamide adenine dinucleotide  
(NAD)|C0027270|||C0027270;C0205748;C1850380|AOD;CHV;CSP;MSH;MTH;MTHSPL;NCI;NDFRT  
;OMIM;RXNORM;SNOMEDCT|1|0.8123|1|  
NAD|3-Carbamoyl-1-.Beta.-D-Ribofuranosylpyridinium Hydroxide 5'-5'-Ester with  
Adenosine 5'-(Trihydrogen Pyrophosphate) Inner Salt|||C0027270|NCI|||  
NAD|3-Carbamoyl-1-.Beta.-D-Ribofuranosylpyridinium Hydroxide, 5'-Ester with  
Adenosine 5'-Pyrophosphate, Inner Salt|||C0027270|NCI|||

NAD|Adenosine 5'-(Trihydrogen Diphosphate), 5'-5'-Ester with 3-(Aminocarbonyl)-1-.Beta.-D-Ribofuranosylpyridinium, Hydroxide, Inner Salt||||C0027270|NCI|||

NAD|Adenosine 5'-(trihydrogen diphosphate), P'-5'-ester with 3-(aminocarbonyl)-1-beta-D-ribofuranosylpyridinium, inner salt||||C0027270|MSH;NDFRT|||

NAD|Atypical Nevus;Atypical naevus;Atypical nevus;atypical naevus;atypical nevi;atypical nevus;Atypical naevus of skin;Atypical nevus of skin;Clark Nevus;Clark's Nevus;DN - Dysplastic naevus;DN - Dysplastic nevus;Dysplastic Nevi;Dysplastic Nevus;Dysplastic naevus;Dysplastic nevus;Nevi, Dysplastic;Nevus, Dysplastic;dysplastic naevus;dysplastic nevi;dysplastic nevus;naevus dysplastic;Dysplastic naevus of skin;Dysplastic nevus of skin;Lentiginous Nevus;atypical nevis;dysplastic

nevis|C0205748|||C0205748|CHV;MSH;MTH;NCI;SNOMEDCT|||

NAD|COENZYME A A 01||||C0027270|MSH|||

NAD|Dysplastic naevus (disorder)|||C0205748|SNOMEDCT|||

NAD|Dysplastic nevus (morphologic abnormality)|||C0205748|SNOMEDCT|||

NAD|Dysplastic nevus of skin (disorder)|||C0205748|SNOMEDCT|||

NAD|NAD [Chemical/Ingredient]||||C0027270|NDFRT|||

NAD|NEUTROPHIL ACTIN DYSFUNCTION|C1850380|||C1850380|MTH;OMIM|||

NAD|Neuroaxonal dystrophy;neuroaxonal dystrophy|C0338473|||C0338473|MSH;OMIM;SNOMEDCT|1|0.0686|

NAD|Nevus with Architectural Disorder and Cytologic Atypia of Melanocytes||||C0205748|NCI|||

NAD|Nicotinamide adenine dinucleotide (substance)|||C0027270|SNOMEDCT|||

NAD|[M] Dysplastic naevus;[M] Dysplastic nevus;[M]Dysplastic naevus;[M]Dysplastic nevus||||C0205748|SNOMEDCT|||

NAD|dehydrogenase|C0030016|||1|0.0289|

NAD|nadolol|C0027302|||C0027302|AOD;CHV;CSP;LCH;LNC;MSH;MTHSPL;NCI;NDFRT;RXNORM;SNOMEDCT;USPMG;VANDF|||

NAD|nevus with architectural disorder|||||1

NAD|new antigenic determinant|||||1

NAD|nicotinic acid dehydrogenase|||||1

NAD|no abnormal discovery|||||1

NAD|no abnormality demonstrable|||||1

NAD|no active disease|||||1

NAD|no acute disease|||||1

NAD|no acute distress||1|0.754|||1

NAD|no apparent distress|||||1

NAD|no appreciable disease|||||1

NAD|noradrenaline|C0028351;C0202145|||1|0.0903|

NAD|normal axis deviation|C1512122|||C1512122|NCI|||1

NAD|nothing abnormal detected||1|0.246|||1

NAD|nothing abnormal discovered|||||1

NAD|sodium dialysate|||||1

NA|Country of Namibia;Republic of Namibia;South West Africa;Southwest Africa|C0027366|||C0027366|MSH;MTH|||

NA|Dietary Sodium;Sodium, Dietary;dietary sodium|C0037570|||C0037570|CSP;MEDLINEPLUS;MSH;MTH;NCI;NDFRT|||

NA|Dosage Form Not Applicable||||C1705113|MTH;NCI|||

NA|N-acetyl|||||1|0.0029|

NA|N-acetyl compounds|||||1|0.0009|

NA|N/A;a n;n a;NOT APPLICABLE;Not Applicable;Not applicable;not applicable;{Not applicable}|C1272460|1|0.02|C1272460;C1546968;C1547280;C1549103;C1609491;C1610044;C1610595;C1611147;C1619691;C1705112;C1705113;C1705512|CHV;HL7V2.5;HL7V3.0;MTH;NCI;SNOMEDCT|||1

NA|NA;Na;{NA}|C0597484;C1272460|||C0027366;C0037473;C0037570;C1272460;C1417587;C1705113;C1705512;C2700321|AOD;CHV;HUGO;NCI|||

NA|NA gene;neurocanthocytosis|C1417587|||C1417587|HUGO;MTH|||

NA|NAM|C0027366;C2826269|||C0027366|NCI|||  
NA|NAMIBIA;Namibia;namibia|C0027366;C1504632|||C0027366|AOD;CHV;LCH;MSH;NCI;SNOM  
EDCT|||  
NA|Na - Sodium;na sodium;Sodium product;[TN440]  
SODIUM|C0037473|||C0037473|CHV;NDFRT;SNOMEDCT|||  
NA|Na element|C0037473;C0597484|||C0037473|CSP|||  
NA|Nadia;Nadia - zebrafish;Nadia Zebrafish|C2700321|||C2700321|MTH;NCI|||  
NA|Namibia (geographic location)|||C0027366|SNOMEDCT|||  
NA|Naphthalene|C0027375;C0027378|||1|0.0022|  
NA|Narcotics Anonymous||1|0.948|||1|  
NA|Nephrogenic adenoma;nephrogenic adenoma|C0334039|||1|0.0019|1|  
NA|No unit of measure required|||C1272460|NCI|||  
NA|Nomina Anatomica|||1|  
NA|None or Not Applicable|||C1272460|NCI|||  
NA|North America|C0028405|||1|0.0019|  
NA|North American|C0425358;C2700615|||1|0.0036|  
NA|Not applicable (qualifier value)|||C1272460|SNOMEDCT|||  
NA|Route of Administration Not Applicable|||C1705512|MTH;NCI|||  
NA|SODIUM;Sodium;Sodium (NOS);Sodium,  
NOS;sodium|C0037473;C0037570;C0597484|1|0.028|C0037473;C0037570|AOD;CHV;CSP;LCH;  
LNC;MSH;MTH;NCI;NDFRT;RXNORM;SNOMEDCT;USPMG;VANDF|1|0.0855|1|  
NA|Sodium (substance)|||C0037473|SNOMEDCT|||  
NA|Sodium [Chemical/Ingredient]|||C0037473|NDFRT|||  
NA|Sodium product (product)|||C0037473|SNOMEDCT|||  
NA|Sodium product (substance)|||C0037473|SNOMEDCT|||  
NA|Sodium, Dietary [Chemical/Ingredient]|||C0037570|NDFRT|||  
NA|WA|C0043038|||C0027366|NCI|||  
NA|[3H]-noradrenaline|||1|0.0055|  
NA|activity|C0026606;C0205177;C0439167;C0441655;C1561536|||1|0.0036|  
NA|applicable|C1272460;C1706839|||C1272460|CHV|||  
NA|concentration|C0086045;C1446561|||1|0.0015|  
NA|influenza virus neuraminidase|||1|0.0067|  
NA|naked neck|||1|0.0015|  
NA|nalidixic  
acid|C0027353|||C0027353|CHV;MSH;MTHSPL;NCI;NDFRT;RXNORM;SNOMEDCT;USPMG;VANDF|1|  
0.0134|1|  
NA|nanoampere|||1|  
NA|naphthenic acid|C0068418|||C0068418|MSH|||  
NA|nasopharyngeal angiofibroma|C1367536|||1|  
NA|needle aspiration|C0181959;C2243017|||1|  
NA|negative affect|||1|0.0077|  
NA|negative affectivity|||1|0.0062|  
NA|neuraminidase|C0027803|||C0027803|CHV;CSP;LNC;MSH;MTH;NDFRT;SNOMEDCT|||1|  
NA|neurologic age|||1|  
NA|neuropathic arthropathy|C0003892|||1|  
NA|neutralizing antibodies;neutralizing  
antibody|C0475463;C1142254|||C0475463|CHV;CSP;MSH;NDFRT;SNOMEDCT|1|0.0087|1|  
NA|neutrophil antibody|C0807098|||C0807098|CHV;LNC|||1|  
NA|neutrophil antigen|||1|0.001|  
NA|new admission|||1|  
NA|nicotianamine|C0660841|||1|0.0017|  
NA|nicotinamide|C0028027;C1142101|||C0028027;C1142101|AOD;CHV;CSP;LNC;MSH;NCI;ND  
FRT;PDQ;SNOMEDCT|1|0.0099|1|  
NA|nicotinic  
acid|C0027996;C0028049|||C0027996;C0028049|AOD;CHV;MSH;NCI;NDFRT;PDQ;SNOMEDCT;US  
PMG;VANDF|1|0.0183|1|  
NA|nitrosamine|C0028197|||C0028197|AOD;CHV;CSP;NCI;SNOMEDCT|||

NA|nitrous acid|C0028214|||C0028214|AOD;CSP;LCH;MSH;NDFRT;SNOMEDCT|||  
NA|no abnormality|||1  
NA|nocturnal asthma|||1|0.0022|  
NA|nodular amyloidoma|||1  
NA|non-A|||1  
NA|non-adherent|||1|0.0015|  
NA|nonadherent|||1|0.0038|1  
NA|nonalcoholic|||1  
NA|nonamniotic|||1  
NA|nonmyelinated axon|C0682683|||1  
NA|noradrenalin;noradrenaline|C0028351;C0202145|||C0028351;C0202145|AOD;CHV;CSP;  
FMA;MSH;NCI;NDFRT;SNOMEDCT;UWDA|1|0.6919|  
NA|noradrenaline-storing|||1|0.0024|  
NA|noradrenergic|C0599861|||1|0.0332|  
NA|norepinephrine|C0028351|||1|0.0051|  
NA|norethindrone  
acetate|C0068980|||C0068980|CHV;MSH;MTHSPL;NCI;NDFRT;PDQ;RXNORM;SNOMEDCT;USPMG;V  
ANDF|1|0.0019|  
NA|normal axis|||1  
NA|nosocomially acquired|||1  
NA|not admitted|||1  
NA|not antagonized|||1  
NA|not attempted|||1  
NA|not available|C1548671|||C1548671|HL7V2.5|||1  
NA|nuclear antibody|C0487261|||1  
NA|nuclear antigen|C0069115|||C0069115|CHV|||1  
NA|nuclear area|||1|0.0094|  
NA|nucleic acid|C0028606|||C0028606;C1325813|CHV;CSP;GO;NCI;SNOMEDCT|1|0.007|1  
NA|nucleoside analog|C1579410|||C1579410|CHV;CSP;NDFRT|||  
NA|nucleus accumbens|C0028633|||C0028633|AOD;CHV;CSP;FMA;MSH;SNOMEDCT|1|0.0202|1  
NA|nucleus ambiguous|||1|0.0024|  
NA|nucleus  
ambiguus|C0152400;C1281211|||C0152400;C1281211|CHV;FMA;NCI;SNOMEDCT;UWDA|1|0.023  
1|1  
NA|nucleus angularis|||1|0.0034|  
NA|numeric aperture|||1  
NA|numerical aperture|||1|0.0038|  
NA|nurse anesthetist|C1321571|1|0.002|||1  
NA|nurse's aide;nursing assistant;nursing  
auxiliary|C0028663|||C0028663|AOD;CHV;HL7V3.0;MSH;NCI;SNOMEDCT|||  
NA|nutrient agar|||1|0.0019|  
NA|release of [3H]noradrenaline|||1|0.0019|  
NG|1-Methyl-3-nitro-1-nitrosoguanidine;Guanidine, N-methyl-N'-nitro-N-nitroso-  
;MNNG;Methylnitronitrosoguanidine;Methylnitrosanitrosoguanidine;N Methyl N' nitro  
N nitrosoguanidine;N methyl N' nitro N nitrosoguanidine;N-Methyl-N'-nitro-N-  
nitrosoguanidine;N-Methyl-N-nitro-N-Nitrosoguanidine;N-methyl-N'-nitro-N-  
nitrosoguanidine;N'-nitro-N-nitroso-N-  
methylguanidine;Nitrosomethylnitrosoguanidine;Nitrosomitromethylguanidine|C0025800  
|||C0025800|CSP;MSH;MTH;NCI;NDFRT|1|0.0308|  
NG|Did not receive therapy or drug for;did not receive therapy or drug  
for;untreated|C0332155|||C0332155|CHV;MTH;SNOMEDCT|||  
NG|Did not receive therapy or drug for (contextual  
qualifier)|||C0332155|SNOMEDCT|||  
NG|Did not receive therapy or drug for (contextual qualifier) (qualifier  
value)|||C0332155|SNOMEDCT|||

NG|Federal Republic of  
Nigeria;NIGERIA;Nigeria;nigeria|C0028075|||C0028075|AOD;CHV;LCH;MSH;MTH;NCI;SNOM  
EDCT|||  
NG|MNG|C0025800;C0026410|||C0025800|NCI|||  
NG|Methylnitronitrosoguanidine [Chemical/Ingredient]|||C0025800|NDFRT|||  
NG|NANOGRAM;Nanogram;nanogram;nanogram(s);nanograms;NGM;nanogram  
(ng)|C0439212|||C0439212|CHV;MTH;NCI;SNOMEDCT|||1  
NG|NASOGASTRIC;Nasogastric;nasogastric;NG - Nasogastric route;NG - Nasogastric  
use;Nasogastric Route of Administration;Nasogastric Route of Drug  
Administration;Nasogastric route;Nasogastric  
use|C0694637|1|1|C0694637|CHV;HL7V2.5;MTH;NCI;SNOMEDCT|1|0.1851|1  
NG|NE|||C0028074|NCI|||  
NG|NER|C0028074;C0524550;C1417823|||C0028074|NCI|||  
NG|NG;Ng;ng|||C0025800;C0028074;C0028075;C0332155;C0439212;C0694637|CHV;LNC;NCI  
;SNOMEDCT|||  
NG|NGA|C0028075;C1882122|||C0028075|NCI|||  
NG|NI|C2348274|||C0028075|NCI|||  
NG|NIGER;Niger;niger|C0028074;C0997002|||C0028074|AOD;CHV;LCH;MSH;MTH;NCI;SNOMED  
CT|||  
NG|Nasogastric route (qualifier value)|||C0694637|SNOMEDCT|||  
NG|Neisseria gonorrhoeae|C0027573|||1|0.1028|1  
NG|Niger (geographic location)|||C0028074|SNOMEDCT|||  
NG|Nigeria (geographic location)|||C0028075|SNOMEDCT|||  
NG|Nitroglycerine;nitroglycerin;nitroglycerine|C0017887;C0885378|||C0017887;C088  
5378|AOD;CHV|1|0.2313|  
NG|Not treated for|||C0332155|SNOMEDCT|||  
NG|Republic of Niger|C0028074|||C0028074|MSH|||  
NG|group|C0441833;C0687744;C1257890;C1552516;C1705428;C1705429|||1|0.0591|  
NG|levonorgestrel|C0023566|||1|0.0257|  
NG|nanogram (qualifier value)|||C0439212|SNOMEDCT|||  
NG|net grains/nucleus|||1|0.0231|  
NG|neurogranin|C0083727;C1417847|||C0083727;C1417847|MSH;MTH;NDFRT;OMIM|1|0.0386  
|  
NG|neutrophil granulocytes|||1|0.018|  
NG|new growth|C0027651|||1|  
NG|ng (qualifier value)|||C0439212|SNOMEDCT|||  
NG|night guard|||1|  
NG|nitrosoguanidine|C0028203|||C0028203|CSP|1|0.0231|  
NG|no good|||1|  
NG|no growth|C0445119|||1|  
NG|nodose ganglia;nodose ganglion|C0028252|||C0028252|FMA;MSH;UWDA|1|0.1208|1  
NG|nodular  
goiter|C0018023;C1318500|||C0018023;C1318500|CHV;MSH;MTH;NDFRT;OMIM;SNOMEDCT|1|0  
.0231|  
NG|nongenetic|||1|  
NG|nongroupable|||1|  
NG|norgestrel|C0028368|||C0028368|AOD;CHV;LCH;MSH;MTHSPL;NCI;NDFRT;PDQ;RXNORM;SN  
OMEDCT;USPMG;VANDF|1|0.036|  
NG|normal glucose|C0860800|||C0860800|CHV|1|0.0283|  
NG|not given|||1|  
NG|nuclear grade|C1518435|||C1518435|CHV;NCI|1|0.054|  
NJ|NJ;New Jersey;jersey new;new  
jersey|C0027971|1|0.002|C0027971|AOD;CHV;LCH;MSH;NCI;SNOMEDCT|1|0.3426|  
NJ|New Jersey (geographic location)|||C0027971|SNOMEDCT|||  
NJ|nanojoule|||1|  
NJ|nasojejunal||1|0.998|C0595833|SNOMEDCT|||1  
NJ|neighbor-joining;neighbour-joining|||1|0.6575|

NKDA|no known drug allergies|C0262581||1|1.000|||1  
NO|Lymph Node Stage N0;N0 Lymph Node Stage;N0;N0 Cancer Stage Finding;N0 Lymph Node Finding;N0 Node Finding;N0 Node Stage;Node Stage N0;Node stage N0;N0 Regional Lymph Node Stage Finding;N0 Stage;N0 stage;N0 Stage Finding;N0 stage (finding);N0 TNM Finding;N0 category|C0441959||C0441959|MTH;NCI;SNOMEDCT||  
NO|N|C0369718;C0441922;C1553036||C1298908|NCI||  
NO|N0 Regional Lymph Nodes Finding|||C0441959|NCI||  
NO|N0 category (finding)|||C0441959|SNOMEDCT||  
NO|N0 stage (tumor staging)|||C0441959|SNOMEDCT||  
NO|NO;No;no;no|C1298908;C1549444||C0028423;C0441959;C1298908;C1546943;C1546946;C1546967;C1548170;C1549056;C1549062;C1549442;C1549444|CHV;HL7V2.5;LNC;MTH;NCI;SNOMEDCT||  
NO|NOR|||C0028423|NCI||  
NO|NORWAY;Norway;norway|C0028423||C0028423|AOD;CHV;CSP;LCH;MSH;MTH;NCI;SNOMEDCT||  
NO|Nitric oxide;nitric oxide;nitric oxide gas;nitrogen monoxide|C0028128|1|0.002|C0028128|AOD;CHV;CSP;MSH;MTH;MTHSPL;NCI;NDFRT;RXNORM;SNOMEDCT;VANDF|1|0.9978|1  
NO|No (qualifier value)|||C1298908|SNOMEDCT||  
NO|No - Assignment of Benefits|C1549442||C1549442|MTH||  
NO|No - Event Expected|||C1546946|MTH||  
NO|No - Event Seriousness|C1546943||C1546943|MTH||  
NO|No - Expanded yes/no indicator|C1549056||C1549056|MTH||  
NO|No - Identity May Be Divulged|||C1546967|MTH||  
NO|No - Notify Clergy Code|C1549062||C1549062|MTH||  
NO|No - Release Information|C1548170||C1548170|MTH||  
NO|No - yes/no indicator|C1549444||C1549444|MTH||  
NO|Node stage N0 (tumor staging)|||C0441959|SNOMEDCT||  
NO|Norway (geographic location)|||C0028423|SNOMEDCT||  
NO|concentration|C0086045;C1446561|||1|0.0009|  
NO|nasal oxygen|||1  
NO|nitric oxide radical|||1|0.0003|  
NO|nitroso-|||1  
NO|nitrous oxide|C0028215||C0028215|AOD;CHV;CSP;LCH;LNC;MSH;MTH;MTHSPL;NCI;NDFRT;RXNORM;SNOMEDCT;VANDF||  
NO|nobelium|C0028237|||1  
NO|nodes|C0746922|||1|0.0004|  
NO|none obtained|||1  
NO|nonobese|||1  
NO|normal|C0205307;C0439166;C2347086||C0205307;C0558145;C1550457;C1550469;C1551394;C1553386;C1553399;C1553402;C1553406;C1704701;C1873497;C2698497|CHV;HL7V2.5;HL7V3.0;LNC;MTH;NCI;OMIM;SNOMEDCT||  
NO|not operable|||1  
NO|nucleolar organizer|C0028609||C0028609|MSH|1|0.0003|  
NO|nucleolus organizer|||1|0.0003|  
NO|number|C0237753;C0449788|1|0.004|||1  
NOS|EC 1.14.13.39|||C0132555|NCI||  
NOS|Endothelium-derived relaxation factor-forming enzyme|||C0132555|SNOMEDCT||  
NOS|Endothelium-derived relaxing factor synthase;NO Synthase;NO synthase;NO-synthase;Nitric Oxide Synthase;Nitric-Oxide Synthase;Nitric-oxide synthase;Oxide Synthase, Nitric;Synthase, Nitric Oxide;nitric oxide synthase;nitric oxide synthases;Nitric Oxide Synthetase;Nitric oxide synthetase;Nitric-Oxide Synthetase;nitric oxide synthetase;synthase|C0132555||C0132555|CHV;CSP;MSH;MTH;NCI;NDFRT;SNOMEDCT|1|0.972|1

NOS|HEP-NOS;Macrophage Nitric Oxide Synthase;NITRIC OXIDE SYNTHASE,  
 MACROPHAGE;NITRIC OXIDE SYNTHASE 2A;Nitric Oxide Synthase  
 2A;NOS2A|C0669372;C1417760|||C0669372;C1417760|HUGO;NCI;OMIM|||  
 NOS|HEP-NOS protein, human;Hepatocyte Nitric Oxide Synthase;NOS Type II;NOS2  
 protein, human;NOS2A protein, human;Nanos2 protein, human;hepatocyte NOS  
 protein, human;iNOS protein, human;inducible nitric oxide 2A,  
 human|C0669372|||C0669372|MSH;MTH;NCI|||  
 NOS|INOS;iNOS|C0669372;C1417760;C1968833|||C0669372;C1417760|HUGO;NCI;OMIM|||  
 NOS|Inducible Nitric Oxide Synthase;NITRIC OXIDE SYNTHASE,  
 INDUCIBLE|C0669372;C1417760;C1533698|||C0669372;C1417760|NCI;OMIM|||  
 NOS|L-Arginine,NADPH:oxygen oxidoreductase (nitric-oxide-  
 forming)|||C0132555|MSH;NDFRT|||  
 NOS|NADPH-Diaphorase|C0027312;C0132555|||C0132555|NCI|||  
 NOS|NOS;Not Otherwise Specified;Not otherwise specified;not otherwise  
 specified;{NOS}|C1518425|1|0.986|C0132555;C0669372;C1417760;C1518425;C1705516|CS  
 P;HUGO;LNC;MTH;NCI|1|0.0253|1  
 NOS|NOS1 wt Allele|C1705516|||C1705516|MTH;NCI|||  
 NOS|NOS2|||C0669372;C1417760|HUGO;NCI;OMIM|||  
 NOS|NOS2 gene;NOS2A Gene;NOS2A, INDUCIBLE, HEPATOCYTE;nitric oxide synthase 2,  
 inducible|C1417760|||C1417760|HUGO;MTH;NCI;OMIM|||  
 NOS|Nitric Oxide Synthase 1 (Neuronal) wt Allele|||C1705516|NCI|||  
 NOS|Nitric Oxide Synthase 2A (Inducible, Hepatocytes) Gene|||C1417760|NCI|||  
 NOS|Nitric Oxide Synthase [Chemical/Ingredient]|||C0132555|NDFRT|||  
 NOS|Nitric-oxide synthase (substance)|||C0132555|SNOMEDCT|||  
 NOS|Not Specified|||C1518425|NCI|||  
 NOS|network operating system|||1  
 NOS|new-onset seizures|C0748604|||1  
 NOS|nitric oxide synthase 2A (inducible, hepatocytes), human|||C0669372|MSH|||  
 NOS|nitric oxide synthesis|C1157570|||C1157570|GO|1|0.0027|  
 NOS|nitrous oxide synthase|||1  
 NOS|no organisms seen|||1  
 NOS|nonorgan-specific|||1  
 NOS|nopaline synthase|C0068949|||C0068949|MSH|||  
 NOS|not on staff|||1  
 NOS|numbers|C0237753;C0449788|||1  
 NPH|Familial juvenile nephronophthisis|C0687120;C1855681|||1|0.0395|  
 NPH|HYDROCEPHALUS, NORMAL-PRESSURE;Hydrocephalus, Normal Pressure;NORMAL  
 PRESSURE HYDROCEPHALUS;Normal Pressure Hydrocephalus;Normal pressure  
 hydrocephalus;Normal pressure hydrocephalus NOS;hydrocephalus normal  
 pressure;hydrocephalus pressure normal;normal pressure hydrocephalus;normal-  
 pressure hydrocephalus;Hakim Syndrome;Hakim Syndromes;Hakim's Syndrome;Hakim's  
 Syndromes;Hakims Syndrome;Syndrome, Hakim;Syndrome, Hakim's;Syndromes,  
 Hakim;Syndromes, Hakim's;hakim syndrome;Low pressure hydrocephalus;low pressure  
 hydrocephalus;NPH;Nph;nph;NPH (Normal Pressure Hydrocephalus);NPH - Normal  
 pressure hydrocephalus;hydrocephalus normal nph pressure;normal pressure  
 hydrocephalus (nph);normal pressure  
 hydrocephaly|C0020258|||C0020258|CHV;COSTAR;DXP;LNC;MSH;MTHICD9;NDFRT;OMIM;QMR;S  
 NOMEDCT|1|0.6626|1  
 NPH|Hydrocephalus, Normal Pressure [Disease/Finding]|||C0020258|NDFRT|||  
 NPH|Low pressure hydrocephalus (disorder)|||C0020258|SNOMEDCT|||  
 NPH|NPH insulin|C0021658|||1|0.0243|  
 NPH|NPHs (Normal Pressure Hydrocephalus)|||C0020258|MSH|||  
 NPH|Normal pressure hydrocephalus (disorder)|||C0020258|SNOMEDCT|||  
 NPH|hydrocephalis normal pressure|||C0020258|CHV|||  
 NPH|nephronophthisis|C0687120|||C0687120|CHV;MTH;OMIM;SNOMEDCT|||1  
 NPH|neutral protamine Hagedorn;neutral protamine hagedorn||1|1|1|0.155|  
 NPH|no previous history|||1

NPH|nucleus prepositus hypoglossi|C0152399|||C0152399|FMA|1|0.0699|  
NPH|nucleus pulposus herniation|||1|  
NPH|patients with normal-pressure hydrocephalus|||1|0.0486|  
NPO|Fasting patient;fasting patients;NBM - Nil by mouth;NPO - Nothing by mouth;Nil by mouth;nil by mouth;Nil per os;nil per os;Nothing by Mouth;Nothing by mouth;nothing by mouth;nil  
peros|C0419179|1|1|C0419179|CHV;MTH;NCI;SNOMEDCT|||1|  
NPO|NBM|||C0419179|SNOMEDCT|||  
NPO|NON PROFIT ORGAN;ORGAN NON PROFIT|||C0029247|MSH|||  
NPO|NONPROFIT ORGAN;ORGAN NONPROFIT|||C0029247|MSH|||  
NPO|NPO|C0029247;C0419179|||C0029247;C0419179|NCI;SNOMEDCT|||  
NPO|Nil by mouth (procedure)|||C0419179|SNOMEDCT|||  
NPO|Nil by mouth (regime/therapy)|||C0419179|SNOMEDCT|||  
NPO|Non Profit Organizations;Non-Profit Organization;Non-Profit Organizations;Organization, Non-Profit;Organizations, Non Profit;Organizations, Non-Profit;non profit organizations;non-profit organizations;Non-profit;Nonprofit;nonprofit;nonprofits;Nonprofit Group;Nonprofit Organization;Nonprofit Organizations;Organization, Nonprofit;Organizations, Nonprofit;nonprofit organization;nonprofit organizations;Not for Profit Organization|C0029247|||C0029247|AOD;CHV;MSH;MTH;NCI|||  
NPO|Nothing by mouth (procedure)|||C0419179|SNOMEDCT|||  
NPO|Starving the patient;patients starving|||C0419179|CHV;SNOMEDCT|||  
NPO|channel activity|C1153410|||1|0.1098|  
NPO|neurogenic pulmonary edema|C0340098|||C0340098|CHV;SNOMEDCT|||  
NPO|nucleus pontis oralis|||1|0.122|  
NPO|nucleus preopticus|||1|0.3659|1|  
NPO|open probability|||1|0.4024|  
NP|(drug) NP||1|0.002|||  
NP|1-nitropyrene|C0044508|||C0044508|MSH;NCI|1|0.0142|  
NP|4-hydroxy-3-nitrophenyl acetyl;4-hydroxy-3-nitrophenylacetyl|C0048309|||1|0.0171|  
NP|4-nonylphenol|C0097405|||1|0.0266|  
NP|CAGH1;CAGH1A;CIZ;NMP4;NUCLEAR MATRIX PROTEIN 4;ZINC FINGER PROTEIN 384;zinc finger protein 384;ZNF384;ZNF384 gene|C1420834|||C1420834|HUGO;MTH;OMIM|||  
NP|CAS-INTERACTING ZINC FINGER PROTEIN|||C1420834|OMIM|||  
NP|CTF2P;CTF2P gene;cardiotrophin 2, pseudogene;neuropoietin|C1824810|||C1824810|HUGO;MTH|||  
NP|EC 2.4.2.1|||C0034135|NCI|||  
NP|Inosine Phosphorylase;Inosine phosphorylase;Phosphorylase, Inosine;inosine phosphorylase;PNP - Purine nucleoside phosphorylase;PNP Human|C0034135|||C0034135|CSP;MSH;NCI;NDFRT;SNOMEDCT|||  
NP|NEPAL;Nepal;nepal|C0027689|||C0027689|AOD;CHV;LCH;MSH;MTH;NCI;SNOMEDCT|||  
NP|NP;Nurse Practitioner;Nurse Practitioners;Nurse practitioner;Nurse practitioners;Practitioner, Nurse;Practitioners, Nurse;nurse practitioner;nurse practitioners|C0028657|1|0.876|C0027689;C0028657;C0034135;C0332124;C1417772;C1420834;C1549435;C1549986;C1618092;C1824810|AOD;CHV;CSP;HL7V2.5;HL7V3.0;HUGO;LCH;LNC;MSH;MTH;NCI;OMIM;SNOMEDCT|1|0.0898|  
NP|NP Gene;Nucleoside Phosphorylase Gene;PNP gene;PUNP|C1417772|||C1417772|HUGO;MTH;NCI|||  
NP|NPL|C0027689;C1150873;C1424540|||C0027689|NCI|||  
NP|NUCLEOSIDE PHOSPHORYLASE;nucleoside phosphorylase|C0133234;C1417772|||C0133234;C1417772|CSP;MSH;MTH;OMIM|1|0.0195|1|  
NP|Nasal polyposis;nasal polyp;nasal polyps|C0027430|||C0027430|CHV;COSTAR;CST;MSH;NCI;SNOMEDCT|1|0.0443|1|  
NP|Nepal (geographic location)|||C0027689|SNOMEDCT|||  
NP|Niemann-Pick|||1|

NP|No past history;No past history of;no past history  
of|C0332124|||C0332124|CHV;MTH;SNOMEDCT|||  
NP|No past history of (contextual qualifier)|||C0332124|SNOMEDCT|||  
NP|No past history of (contextual qualifier) (qualifier  
value)|||C0332124|SNOMEDCT|||  
NP|Nucleoside Phosphorylases, Purine;PURINE NUCLEOSIDE  
PHOSPHORYLASE;Phosphorylase, Purine-Nucleoside;Phosphorylases, Purine  
Nucleoside;Purine Nucleoside Phosphorylase;Purine Nucleoside  
Phosphorylases;Purine nucleoside phosphorylase;Purine-Nucleoside  
Phosphorylase;Purine-nucleoside phosphorylase;purine nucleoside  
phosphorylase;purine nucleoside  
phosphorylases|C0034135;C1417772|||C0034135;C1417772|AOD;CHV;CSP;HUGO;LNC;MSH;MT  
H;NCI;NDFRT;OMIM;SNOMEDCT|||  
NP|Nurse practitioner (occupation)|||C0028657|SNOMEDCT|||  
NP|PNP|||C0034135;C1417772|HUGO;NCI;OMIM|||  
NP|PURINE-NUCLEOSIDE:ORTHOPHOSPHATE RIBOSYLTRANSFERASE;Purine-  
nucleoside:orthophosphate  
ribosyltransferase|||C0034135;C1417772|MSH;NDFRT;OMIM|||  
NP|Purine-Nucleoside Phosphorylase [Chemical/Ingredient]|||C0034135|NDFRT|||  
NP|Purine-nucleoside phosphorylase (substance)|||C0034135|SNOMEDCT|||  
NP|alcohol nonpreferring|||1|0.0041|  
NP|anti-(4-hydroxy-3-nitrophenyl)acetyl|||1|0.0112|  
NP|hapten (4-hydroxy-3-nitrophenyl)acetyl|||1|0.0106|  
NP|influenza virus nucleoprotein|||1|0.0266|  
NP|metabolite norpropoxyphene|||1|0.003|  
NP|nanoparticle;nanoparticles|C1450054|||C1450054|MSH;NCI|1|0.0337|  
NP|nasal prong;nasal prongs|C0445087|||C0445087|CHV|||1  
NP|nasopharyngeal|C0027442|1|0.106|C0027442|CHV;HL7V2.5;SNOMEDCT|1|0.0473|1  
NP|nasopharynx|C0027442;C1268975|1|0.004|||1|0.01|1  
NP|natriuretic  
peptide|C1144709;C2709270|1|0.002|C1144709;C2709270|CHV;LNC;MTH;NDFRT|1|0.0437|1  
NP|near point|C0429572|||1|1  
NP|neck pressure|||1|0.0095|  
NP|necrotizing pancreatitis|C0267941|||C0267941|CHV;CST;SNOMEDCT|1|0.0089|1  
NP|negative priming|||1|0.0136|  
NP|neonatal-perinatal|||1|1  
NP|neopterin|C0068527;C0202143|||C0068527;C0202143|CHV;LNC;MSH;NCI;NDFRT;SNOMEDC  
T|1|0.0106|  
NP|nepals|||C0027689|CHV|||  
NP|neper|C1553004|||1|1  
NP|nephrographic phase|||1|1  
NP|neptunium|C0027734|||1|1  
NP|nerve palsy|C0262576|||1|1  
NP|neuritic plaque|C0333463|||C0333463|CHV;CSP;MSH|1|0.0065|1  
NP|neuropathic pain|C0027796|||1|0.0065|1  
NP|neuropathology|C0876934;C1540677;C1555824|||1|1  
NP|neuropeptide|C0027895|||C0027895|CHV;CSP;MSH;NCI;NDFRT|||1  
NP|neurophysin|C0027900|||C0027900|CSP;FMA;LNC;SNOMEDCT;UWDA|1|0.0236|1  
NP|neuropsychiatric|||1|0.0189|1  
NP|neuropsychiatry|C0870956|||1|1  
NP|neuropsychological|||1|0.0573|  
NP|neutrogenic precautions|||1|1  
NP|new patient|||1|1  
NP|newly presented|||1|1  
NP|nifedipine|C0028066|||C0028066|AOD;CHV;CSP;LCH;LNC;MSH;MTHSPL;NCI;NDFRT;RXNOR  
M;SNOMEDCT;USPMG;VANDF|1|0.0059|  
NP|nitrogen-phosphorus|||1|1

NP|nitrophenol|C0028187|||||1  
NP|nitroprusside|C0028193|||C0028193|AOD;CHV;CSP;LNC;MSH;NCI;NDFRT;RXNORM;SNOMED  
CT;USPMG|||  
NP|nitrosopiperidine|C0068235|||C0068235|MSH|||  
NP|no pain|C0234225|||||1  
NP|no phone|||||1  
NP|no progress|||||1  
NP|no progression|||||1  
NP|nodular paraganuloma|||||1  
NP|non-pregnant;nonpregnant|||||1|0.0485|  
NP|nonpalpable|||||1  
NP|nonpathologic|||||1  
NP|nonpaying|||||1  
NP|nonphagocytic|||||1  
NP|nonpracticing|||||1  
NP|nonproducer|||||1  
NP|nonylphenol|C0068946|||C0068946|CHV;MSH|1|0.0797|  
NP|normal|C0205307;C0439166;C2347086|||||1|0.0077|  
NP|normal plasma|C0440742|||C0440742|CHV;SNOMEDCT|1|0.0047|1  
NP|normal pregnancy|C0232989|||||1|0.0065|  
NP|normal pregnant|||||1|0.0053|  
NP|normal pregnant women|||||1|0.0035|  
NP|normal pressure|||||1  
NP|normal prostate|||||1|0.0047|  
NP|normal protein|C0860902|||C0860902|CHV|||  
NP|normal-phase|||||1|0.0142|  
NP|norpropoxyphene|C0069020|||C0069020|CHV;LNC;MSH;SNOMEDCT|||  
NP|nosocomial pneumonia|C0949083|||C0949083|CHV;SNOMEDCT|1|0.0307|1  
NP|not palpable|||||1  
NP|not perceptible|||||1  
NP|not performed|||||1  
NP|not practiced|||||1  
NP|not pregnant|C0232973;C2826362|||||1  
NP|not present|||||1  
NP|not protected|||||1  
NP|not provided|||||1  
NP|noun phrase|||||1|0.0077|  
NP|nuclear pharmacy|C1556041|||||1  
NP|nuclear protein|C0028589;C0949374|||C0028589;C0949374|CHV;CSP;MSH;MTH;NCI|||  
NP|nucleocapsid|C0178774;C1167518|||C0178774;C1167518|CSP;GO;MSH;MTH|1|0.023|  
NP|nucleocapsid protein|C0524816|||C0524816|MSH;NCI;NDFRT|1|0.0478|  
NP|nucleoplasmic|||||1  
NP|nucleoprotein;nucleoproteins|C0028612|||C0028612|CHV;CSP;MSH;NDFRT;SNOMEDCT|1  
|0.0071|1  
NP|nucleotide pair|||||1|0.0112|1  
NP|nucleotide position|||||1|0.0224|  
NP|nucleus pulposus|C1185714|||C1185714|CHV;FMA;UWDA|1|0.0337|  
NP|nursed poorly|||||1  
NP|nursing practice|||||1  
NP|nursing procedure|C0204636|||||1  
NP|p-nonylphenol|||||1|0.0171|  
NP|patients|C0030705|||||1|0.0059|  
NP|proper name|||||1  
NP|sodium nitroprusside|C0037533|||||1|0.0555|  
NSAID|AIANS|||C0003211|MSH|||  
NSAID|ANTI INFLAMM AGENTS NONSTEROIDAL;ANTIINFLAMM AGENTS NON STEROIDAL;NON  
STEROIDAL ANTI INFLAMM AGENTS|||C0003211|MSH|||

NSAID|ANTIINFLAMMATORY AGENTS NONSTEROIDAL;Agents, Non-Steroidal Anti-Inflammatory;Agents, Nonsteroidal Anti-Inflammatory;Agents, Nonsteroidal Antiinflammatory;Anti Inflammatory Agents, Non Steroidal;Anti Inflammatory Agents, Nonsteroidal;Anti-Inflammatory Agents, Non-Steroidal;Anti-Inflammatory Agents, Nonsteroidal;Antiinflammatory Agents, Non Steroidal;Antiinflammatory Agents, Nonsteroidal;NONSTEROIDAL ANTIINFLAMMATORY AGENTS;Non Steroidal Anti Inflammatory Agents;Non-Steroidal Anti-Inflammatory Agents;Non-steroidal Anti-inflammatory Agent;Non-steroidal Antiinflammatory Agent;Non-steroidal anti-inflammatory agent;Non-steroidal anti-inflammatory agent, NOS;Nonsteroidal Anti Inflammatory Agents;Nonsteroidal Anti-Inflammatory Agents;Nonsteroidal Anti-inflammatory Agent;Nonsteroidal Antiinflammatory Agent;Nonsteroidal Antiinflammatory Agents;non-steroidal anti-inflammatory agent;nonsteroidal antiinflammatory agent;NSAID;NSAIDS;NSAIDS;nsaid;nsaids;NSAID - Non-steroidal anti-inflammatory drug;Non-steroidal Anti-inflammatory Drug;Non-steroidal Antiinflammatory Drug;Non-steroidal anti-inflammatory drug;Nonsteroidal Anti-inflammatory Drug;Nonsteroidal Anti-inflammatory Drugs;Nonsteroidal Antiinflammatory Drug;non-steroidal anti-inflammatory drug;non-steroidal antiinflammatory drugs;nonsteroidal anti-inflammatory drug;nonsteroidal anti-inflammatory drugs;nonsteroidal antiinflammatory drug;nonsteroidal antiinflammatory drugs;Nonsteroidal Anti-inflammatory Drug [EPC];nonsteroidal anti-inflammatory drugs (NSAIDs)|C0003211|1|1|C0003211|AOD;CHV;CSP;MSH;NCI;NDFRT;SNOMEDCT;USPMG|1|0.994|1  
NSAID|NSAIA||||C0003211|MSH|||  
NSAID|Non-steroidal anti-inflammatory agent (product)||||C0003211|SNOMEDCT|||  
NSAID|Non-steroidal anti-inflammatory agent (substance)||||C0003211|SNOMEDCT|||  
NSAID|Non-steroidal anti-inflammatory drug (substance)||||C0003211|SNOMEDCT|||  
NSAID|Non-steroidal anti-inflammatory product||||C0003211|SNOMEDCT|||  
NSAID|Non-steroidal anti-inflammatory product (substance)||||C0003211|SNOMEDCT|||  
NSAID|non-steroidal anti-inflammatory|||||1|0.0059|  
NST|Nonsense Syllable Test|||||||1  
NST|Nutrition Support Team|||||1|0.027|  
NST|neospinothalamic|||||||1  
NST|neostigmine test|||||||1  
NST|nerve sheath tumor|C0206727|||C0206727|CHV;NCI;SNOMEDCT|||  
NST|nerve stimulation therapy|||||||1  
NST|neurostructural integration technique|||||||1  
NST|no specific type|||||||1  
NST|nocistatin|C0672514;C1418716|||C0672514;C1418716|HUGO;MSH;MTH|1|0.0202|  
NST|non-shivering thermogenesis|||||||1|0.0427|  
NST|non-stress test;nonstress test;nonstress testing|C1314734|1|0.996|C1314734|CHV;SNOMEDCT|1|0.3011|1  
NST|nondirective supportive therapy|||||||1|0.0135|  
NST|nonmyeloablative stem cell transplant|||||||1  
NST|nonshivering thermogenesis|||||||1|0.1596|1  
NST|normal sphincter tone|||||||1  
NST|not sooner than|||||||1  
NST|nucleus of the solitary tract|C0175518|||C0175518|MSH;NCI|1|0.3191|  
NST|nutritional status type|||||||1  
NST|nutritional support technologist||1|0.002|||1  
NST|stem cell transplantation|C1504389|||||1|0.1169|  
NSVD|NSVD;Normal Spontaneous Vaginal Delivery;normal spontaneous vaginal delivery|C2986704|1|1|C2986704|NCI|||1  
NSVD|Normal Delivery|C0269694;C1384485;C2986704|||C2986704|NCI|||1  
NSVD|nonstructural valve deterioration|||||||1

NTD|Defect, Neural Tube;Defects, Neural Tube;NEURAL TUBE DEFECTS;Neural Tube Defect;Neural Tube Defects;Neural tube defect;defect neural tube;defects neural tube;neural tube defect;neural tube defects;tube neural defects;Developmental Defects, Neural Tube;Developmental Neural Tube Defects;Neural Tube Developmental Defects;NTD;NTD - Neural tube  
defect|C0027794|1|0.002|C0027794|CHV;CSP;LNC;MEDLINEPLUS;MSH;MTH;NCI;NDFRT;OMIM;SNOMEDCT|1|0.8646|1  
NTD|N-terminal domain|||||1|0.1069|  
NTD|NTD Laboratories, Inc|||||0.988|||||  
NTD|Neural Tube Defects [Disease/Finding]||||C0027794|NDFRT|||  
NTD|Neural tube defect (disorder)||||C0027794|SNOMEDCT|||  
NTD|Normalized Total Dose|||||1|0.0285|  
NTD|Spinal Dysraphism|C0027794;C0080178|||C0027794|NCI|||  
NTD|negative to date||1|0.010|||||1  
NTD|nitrendipine|C0028127|||C0028127|AOD;CHV;CSP;LCH;MSH;NCI;NDFRT;RXNORM;SNOMED CT|||  
NTD|nitroblue tetrazolium dye|||||||1  
NTD|noise tone difference|||||||1  
OB|CAD11;CDH11;CDH11 gene;CDHOB|C1413269|||C1413269|HUGO;MTH;OMIM|||  
OB|CADHERIN 11;CADHERIN, OSTEOBLAST;OB-CADHERIN;OB-Cadherin|C0297505;C1413269|||C1413269|HUGO;OMIM|||  
OB|Discipline of obstetrics;Obstetrics;obstetrics;field of maternity care|C0028773|||C0028773;C0334897;C0700061;C1549402|CHV;CSP;HL7V2.5;HL7V3.0;LCH;LNC;MSH;MTH;NCI;SNOMEDCT|||1  
OB|FLJ94114;LEP wt Allele|C2986870|||C2986870|MTH;NCI|||  
OB|LEP|||C1416825|HUGO;NCI;OMIM|||  
OB|LEP Gene;LEP gene|C1416825|||C1416825|HUGO;MTH;NCI|||  
OB|LEPTIN;leptin|C0299583;C1295176;C1416825|||C1416825|HUGO;OMIM|1|0.0332|  
OB|Leptin (Murine Obesity Homolog) Gene|||C1416825|NCI|||  
OB|Leptin (Murine Obesity Homolog) wt Allele|||C2986870|NCI|||  
OB|Maternity care|C0028773;C0374764|||C0028773|SNOMEDCT|||  
OB|OB;OBS|C0028773;C1413269;C1416825;C2986870|||C0028773;C1413269;C1416825;C2986870|HUGO;LNC;NCI;OMIM|||  
OB|OBESE, MOUSE, HOMOLOG OF|||C1416825|OMIM|||  
OB|OBESITY, MORBID, WITH HYPOGONADISM|||C1416825|OMIM|||  
OB|OBESITY, SEVERE, DUE TO LEPTIN DEFICIENCY|||C1416825|OMIM|||  
OB|Obese, Mouse, Homolog of Gene|||C2986870|NCI|||  
OB|Obstetrical;obstetric|C0028773;C0205484|1|1|C0028773;C0205484|LNC;NCI|||1  
OB|Obstetrics (qualifier value)|||C0028773|SNOMEDCT|||  
OB|Olfactory bulbectomy|||||1|0.0123|  
OB|Oligoclonal bands;oligoclonal band|C0069426|||C0069426|CHV;SNOMEDCT|1|0.0283|1  
OB|Otilonium bromide;otilonium bromide|C0134250|||C0134250|CHV;MSH;NCI;RXNORM|1|0.0098|  
OB|cadherin 11, type 2, OB-cadherin (osteoblast)|||C1413269|HUGO|||  
OB|estradiol benzoate;oestradiol benzoate|C0167626|||C0167626|CHV;LCH;MSH;NCI;SNOMEDCT|1|0.0811|  
OB|obese|C0028754|||C0028754|CHV;DXP;SNOMEDCT|||1  
OB|obese gene|||||1|0.0209|  
OB|obesity|C0028754;C1963185|||C0028754;C1963185|AOD;CCS;CHV;COSTAR;CSP;CST;DXP;LCH;MEDLINEPLUS;MSH;MTH;NCI;NDFRT;OMIM;PDQ;QMR;SNOMEDCT|||1  
OB|objective benefit|||||||1  
OB|obliterative bronchiolitis|C0006272|||C0006272|CHV;DXP;SNOMEDCT|1|0.1597|1  
OB|obstetrician|C0334897|||C0334897|CHV;MTH;SNOMEDCT|||  
OB|occlusion bodies|||||1|0.0098|  
OB|occult bacteremia|||||||1  
OB|occult bleeding|C0333282|||C0333282|CHV;SNOMEDCT|||1

OB|occult blood|C0028792;C2698644|||C0028792;C2698644|CHV;MSH;MTHICD9;NCI|||1  
OB|olfactory  
bulb|C0028936;C1281094|||C0028936;C1281094|AOD;CHV;CSP;FMA;MSH;NCI;SNOMEDCT|1|0.4484|1  
OB|olfactory bulbectomized|||||1|0.027|  
OB|oligoclonal IgG bands|||||1|0.0111|  
OB|open biopsy|C0184922|||||1  
OB|osteoblast;osteoblasts|C0029418|||C0029418|AOD;CHV;CSP;FMA;MSH;NCI;SNOMEDCT;UWDA|1|0.0713|1  
OB|osteoblast-enriched|||||1|0.0209|  
OB|osteoblast-like|||||1|0.016|  
OB|osteoblastic|||||1|0.0147|  
OB|osteoblastoma|C0029417|||||1  
OB|oxidative burst|C0085416|||C0085416|CHV;GO;MSH;NCI|1|0.0246|  
OB|product of the obesity|||||1|0.0111|  
OCD|Anancastic neurosis;Anankastic neurosis;anancastic neurosis;Disorder, Obsessive-Compulsive;Disorders, Obsessive-Compulsive;OBSESSIVE COMPULSIVE DISORDER;OBSESSIVE-COMPULSIVE DISORDER;Obsessive Compulsive Disorder;Obsessive compulsive disorder;Obsessive compulsive disorder, NOS;Obsessive-Compulsive Disorder;Obsessive-Compulsive Disorders;Obsessive-compulsive disorder;Obsessive-compulsive disorder NOS;Obsessive-compulsive disorders;obsessive compulsive disorder;obsessive-compulsive disorder;obsessive-compulsive disorders;NEUROSIS, OBSESSIVE COMPULSIVE;Neuroses, Obsessive-Compulsive;Neurosis, Obsessive Compulsive;Neurosis, Obsessive-Compulsive;OBSESSIVE COMPULSIVE NEUROSIS;OBSESSIVE-COMPULSIVE NEUROSIS;Obsessive Compulsive Neurosis;Obsessive compulsive neurosis;Obsessive-Compulsive Neuroses;Obsessive-Compulsive Neurosis;Obsessive-compulsive neurosis;obsessive compulsive neurosis;obsessive-compulsive neurosis;OBSESSIVE-COMPULSIVE REACTION;REACTION OBSESSIVE-COMPULSIVE;OCD - Obsessive-compulsive disorder;obsessive compulsive disorder (OCD)|C0028768|1|0.952|C0028768|AOD;CHV;COSTAR;CSP;CST;DXP;ICD9CM;LCH;LNC;MEDLINEPLUS;MSH;MTH;MTHICD9;NCI;NDFRT;OMIM;QMR;RAM;SNOMEDCT|1|0.94|1  
OCD|Anankastic Personalities;Anankastic Personality;Personalities, Anankastic;Personality, Anankastic|C0009595;C0028768|||C0028768|MSH;NDFRT|||  
OCD|Dissecans, Osteochondritis;OSTEOCHONDRITIS DISSECANS;Osteochondritis Dissecans;Osteochondritis dissecans;osteochondritis dissecans;Idiopathic avascular necrosis;idiopathic avascular necrosis;OCD - Osteochondritis dissecans;OD - Osteochondritis dissecans;OSTEOCHONDRITIS DESSICANS;Osteochondrosis dessicans;Osteochondrosis dissecans;osteochondrosis dissecans|C0029421|1|0.048|C0029421|CHV;COSTAR;DXP;ICD9CM;MSH;MTH;NCI;NDFRT;SNOMEDCT|1|0.0352|1  
OCD|OBSESSIVE COMPULSIVE DIS;Obsessive-compulsive dis||||C0028768|ICD9CM;MSH|||  
OCD|OCC|||C0029421|SNOMEDCT|||  
OCD|OCD|C0028768;C0029421|||C0028768;C0029421|CHV;CSP;MEDLINEPLUS;NCI;OMIM;SNOMEDCT|||  
OCD|OD|C0029421;C0439164;C1512019|||C0029421|OMIM|||  
OCD|OSTEOCHONDRITIS DISSECANS, SHORT STATURE, AND EARLY-ONSET OSTEOARTHRITIS|||C0029421|OMIM|||  
OCD|Obsessive compulsive disorder (disorder);Obsessive-compulsive disorder (disorder);Obsessive-compulsive disorder NOS (disorder)|||C0028768|SNOMEDCT|||  
OCD|Obsessive-Compulsive Disorder [Disease/Finding]|||C0028768|NDFRT|||  
OCD|Osteochondrit dissecans|||C0029421|ICD9CM|||  
OCD|Osteochondritis Dissecans [Disease/Finding]|||C0029421|NDFRT|||  
OCD|Osteochondritis dissecans (disorder)|||C0029421|SNOMEDCT|||  
OCD|[X]Obsessive-compulsive disorder, unspecified|||C0028768|SNOMEDCT|||  
OCD|[X]Obsessive-compulsive disorder, unspecified (disorder)|||C0028768|SNOMEDCT|||  
OCD|obsessive-compulsive|||||1|0.0068|

OCD|obsessive-compulsive psychoneurosis or reaction||||C0028768|AOD|||  
OCD|occupational contact dermatitis|||||1|0.0093|  
OCD|organ-confined disease|||||1|0.0031|  
OCD|osteochondral defect|||||1|  
OCD|ovarian cholesterol depletion|||||1|  
OCD|oxygen cost diagram|||||1|0.0056|  
ODT|Oculodynamic Test;oculodynamic test|||||1|1|1|  
ODT|optical Doppler tomography|||||1|  
ODT|orally disintegrating tablet||1|1.000|||1|  
ODT|right occiput transverse|||||1|  
OFC|CLEFT LIP WITH OR WITHOUT CLEFT PALATE, NONSYNDROMIC, 1||||C1861537|OMIM|||  
OFC|CLEFT LIP/PALATE, NONSYNDROMIC||||C1861537|OMIM|||  
OFC|OFC;OROFACIAL CLEFT, NONSYNDROMIC|C1861537|||C1861537|OMIM|||  
OFC|OFC1;OROFACIAL CLEFT 1|C1417940;C1861537|||C1861537|MTH;OMIM|||  
OFC|head circumference;occipital-frontal circumference|C0262499|1|1|||1|0.1111|1|  
OFC|occipitofrontal circumference|||||1|0.127|  
OFC|office|C0442603|||||1|  
OFC|open food challenge|||||1|  
OFC|oral food challenge|||||1|  
OFC|orbitofacial cleft|||||1|  
OFC|orbitofrontal cortex|C2331062|||||1|0.7619|  
OFC|osteitis fibrosa  
cystica|C0029405|||C0029405|CHV;DXP;MSH;MTH;NCI;NDFRT;SNOMEDCT|||1|  
OKT3|Anti-CD3 Monoclonal Antibody OKT3;Anti-CD3 monoclonal antibody OKT3;Anti-  
CD3 monoclonal antibody OKT 3;MOAB OKT 3;MOAB OKT3;MoAb OKT3;MUROMONAB-  
CD3;Muromonab CD3;Muromonab-CD3;muromonab cd3;muromonab-CD3;muromonab-  
cd3;Monoclonal Antibody OKT3;monoclonal antibody OKT3;Muromonab-CD3 Monoclonal  
Antibody;muromonab-CD3 monoclonal antibody;OKT3;okt3;monoclonal antibody OKT  
3|C0085379|||C0085379|CHV;LNC;MSH;MTH;MTHSPL;NCI;NDFRT;PDQ;RXNORM;SNOMEDCT;USPMG  
;VANDF|1|0.3571|  
OKT3|Muromonab-CD3 (product)|||C0085379|SNOMEDCT|||  
OKT3|Muromonab-CD3 (substance)|||C0085379|SNOMEDCT|||  
OKT3|Muromonab-CD3 [Chemical/Ingredient)|||C0085379|NDFRT|||  
OKT3|anti-CD3 antibodies|||||1|0.1667|  
OKT3|anti-CD3 monoclonal antibody|||||1|0.3095|  
OKT3|murine monoclonal anti-CD3 antibody|||||1|0.1667|  
OKT3|orthoclone OKT3/Muromonab-CD3||1|1.000|||1|  
OM1|obtuse marginal 1||1|1.000|||1|  
OM|MU|C0347978|||C0028971|NCI|||  
OM|OM|C0028971;C1705272|||C0028971;C1705272|NCI|||  
OM|OMAN;Oman;oman;OMN|C0028971|||C0028971|AOD;CHV;LCH;MSH;MTH;NCI;SNOMEDCT|||  
OM|Occupational medicine;occupational  
medicine|C0028802|||C0028802;C1552437;C1555855;C1555921|CHV;CSP;HL7V3.0;MSH;NCI;  
SNOMEDCT|1|0.0121|1|  
OM|Oman (geographic location)|||C0028971|SNOMEDCT|||  
OM|Oncostatin M;oncostatin M|C0069535;C1149423;C1335093|||||1|0.0836|1|  
OM|Oral mucositis;oral  
mucositis|C0038362;C1568868|||C0038362;C1568868|CHV;MSH;MTH;NCI;SNOMEDCT|1|0.018  
9|1|  
OM|Organ Measurement Domain;Organ Measurements|C1705272|||C1705272|MTH;NCI|||  
OM|Osborn-Mendel|||||1|  
OM|Osborne-Mendel|||||1|0.035|  
OM|Ovum mutant|||||1|0.0135|  
OM|every morning|C0585329|||||1|  
OM|obtuse marginal||1|1.000|||1|  
OM|occipitomenta|||||1|  
OM|ocular melanoma|C0558356|||||1|

OM|ocular movement|||||1  
OM|oculomotor|C0872237|||C0872237|CHV;CSP|||1  
OM|olfactory mucosa|C0028937|||C0028937|CHV;LCH;MSH;NCI|1|0.0202|  
OM|omans|||C0028971|CHV|||  
OM|omental|C0028977|||C0028977|CHV;SNOMEDCT|||  
OM|omeprazole|C0028978|||C0028978|AOD;CHV;CSP;LNC;MSH;MTHSPL;NCI;NDFRT;PDQ;RXNORM;SNOMEDCT;USPMG;VANDF|1|0.0229|  
OM|oncomodulin|C0069534;C1417929|||C0069534;C1417929|HUGO;MSH;MTH;OMIM|1|0.0121|  
OM|operating microscope|C0181849|||||1  
OM|operative mortality|||||1|0.0323|  
OM|optical microscopy|C2984701|||C2984701|NCI|1|0.0323|  
OM|oral motor|||||1  
OM|oral mucosa|C0026639|||||1|0.0121|  
OM|orbitomeatal|||||1  
OM|organomegaly|||||1  
OM|osteomalacia|C0029442|||C0029442|AOD;CHV;COSTAR;CSP;CST;DXP;LCH;MSH;MTH;NCI;NDFRT;OMIM;QMR;SNOMEDCT|1|0.035|1  
OM|osteomyelitis|C0029443|||C0029443|AIR;AOD;CHV;COSTAR;CSP;CST;DXP;LCH;MEDLINEPLUS;MSH;MTH;NCI;NDFRT;OMIM;SNOMEDCT|1|0.027|1  
OM|osteopathic manipulation|C0949744|||C0949744|CHV;MSH;SNOMEDCT|||1  
OM|osteopathic manipulative|||||1  
OM|otitis  
media|C0029882;C2827407|||C0029882;C2827407|CHV;COSTAR;CSP;CST;DXP;LCH;MEDLINEPLUS;MSH;MTH;NCI;NDFRT;OMIM;SNOMEDCT|1|0.2709|1  
OM|outer medulla|||||1|0.0337|  
OM|outer membrane|C1167331|||C1167331|CHV;GO|1|0.3073|1  
OM|ovomucoid|C0029960|||C0029960|CHV;CSP;LNC;MSH;NDFRT;SNOMEDCT|1|0.0162|  
OM|ovulation method|||||1|0.0148|1  
OM|oxygen mask|C0181744|||||1  
OM|oxymatrine|C0069821|||C0069821|CHV;MSH|||  
OP|1,10-phenanthroline;o-phenanthroline|C0087870|||||1|0.0497|  
OP|4-Tert-octylphenol;4-tert-octylphenol|C0537565|||C0537565|MSH|1|0.0464|  
OP|Organophosphorus pesticides|||||1|0.011|  
OP|mice homozygous for the osteopetrosis|||||1|0.0088|  
OP|obesity-prone|||||1|0.0099|  
OP|oblique presentation|C0426058|||||1  
OP|oblique presentation/occiput posterior||1|0.242|||||  
OP|occipitoparietal|||||1  
OP|occiput posterior|C0856256|1|0.006|C0856256|CHV|||1  
OP|occupational physician|C0401976|||C0401976|CHV;SNOMEDCT|||  
OP|octylphenol|C1258354|||C1258354|MSH|||  
OP|old patient|||||1  
OP|olfactory peduncle|C2335775|||C2335775|FMA|||1  
OP|oligodendrocyte progenitor|||||1|0.0166|  
OP|opaque|C0029053;C1261286;C1882150|||C0029053;C1261286;C1882150|CHV;MTH;NCI;SNOMEDCT|||  
OP|open;opening|C0175566;C1882151|||||1  
OP|opening pressure|||||1|0.0077|1  
OP|operation|C0543467|||C0543467;C1880161|CHV;MEDLINEPLUS;MTH;NCI;SNOMEDCT|||1  
OP|operative|C1882154|1|0.110|||||1  
OP|operative  
procedure|C0543467;C0677612|||C0543467;C0677612|CHV;MSH;SNOMEDCT|||1  
OP|ophthalmic||1|0.010|||||  
OP|ophthalmology|C0029087;C1555792|||C0029087;C1555792|CHV;HL7V3.0;LCH;LNC;MEDLINEPLUS;MSH;NCI;SNOMEDCT|||1  
OP|opisthocranium|C2336409|||||1

OP|opponens  
 pollicis|C0224287;C1305008|||C0224287;C1305008|FMA;SNOMEDCT;UWDA|1|0.011|1  
 OP|oral and pharyngeal mucositis|||||||1  
 OP|organizing pneumonia|C0264383|||C0264383|CHV|1|0.0188|  
 OP|organophosphate|C0031701|||C0031701|CHV;NCI;SNOMEDCT|1|0.2829|  
 OP|organophosphate pesticide|C0360429|||||1|0.0122|  
 OP|organophosphorous|||||1|0.0254|1  
 OP|organophosphorus|||||1|0.2376|  
 OP|organophosphorus compound;organophosphorus  
 compounds|C0029254|||C0029254|CHV;SNOMEDCT|1|0.0221|  
 OP|original package|||||||1  
 OP|oropharyngeal|C0521367|||C0521367;C0553694;C1522409|CHV;CSP;CST;MTH;NCI;SNOME  
 DCT|1|0.011|  
 OP|oropharynx|C0521367;C1280659|1|0.616|||1|0.0099|1  
 OP|ortho-phenanthroline|C0134184|||C0134184|MSH|||  
 OP|orthostatic proteinuria|C0232867|||C0232867|CHV;MTHICD9;SNOMEDCT|||1  
 OP|oscillatory potential;oscillatory potentials|||||1|0.053|1  
 OP|osmotic pressure|C0029393|||C0029393|AOD;CHV;CSP;MSH;SNOMEDCT|1|0.0088|1  
 OP|osteopetrosis|C0029454|||C0029454|CHV;COSTAR;CSP;DXP;ICD9CM;LCH;MSH;NCI;NDFRT  
 ;SNOMEDCT|||  
 OP|osteopetrotic|||||1|0.0265|  
 OP|osteopontin|C0069676;C1420369|||C0069676;C1420369|CHV;CSP;MSH;MTH;NCI;NDFRT;O  
 MIM;SNOMEDCT|||  
 OP|osteoporosis|C0029456|||C0029456;C1962963;C2678504;C2911643|AOD;CCS;CHV;COSTA  
 R;CSP;CST;DXP;ICD9CM;ICPC;LCH;LNC;MEDLINEPLUS;MSH;MTH;NCI;NDFRT;OMIM;PDQ;QMR;SNO  
 MEDCT|1|0.1061|1  
 OP|osteoporotic|||||1|0.0099|  
 OP|other psychotic|||||||1  
 OP|out-  
 patient;outpatient|C0029921;C1548439;C1549405|1|0.002|C0029921|CHV;MSH|1|0.0144|  
 1  
 OP|ova and parasites||1|0.002|||||  
 OP|overpressure|||||||1  
 OP|overproof|||||||1  
 OP|ovine prolactin|||||||1  
 ORIF|Open reduction and internal fixation;open reduction and internal  
 fixation;open reduction internal fixation;open reduction internal fixation  
 (ORIF)|C1297885|1|1|C0747060;C1297885|CHV|1|1|1  
 ORIF|orif|C0747060|||C0747060|CHV|||  
 OR|(drug) OR||1|0.002|||||  
 OR|NADPH-cytochrome P450 reductase|C0027310|||||1|0.0011|  
 OR|OPERATING ROOM;Operating Room;Operating Rooms;Operating room;Operating  
 rooms;Room, Operating;Rooms, Operating;operating room;operating rooms;room  
 operating|C0029064;C1578465|1|0.932|C0029064;C1578465|CHV;CSP;HL7V2.5;LCH;MSH;MT  
 H;NCI;SNOMEDCT|1|0.0418|1  
 OR|OR;Or;or|||C0029064;C0029195;C1518602;C1706533|HL7V3.0;NCI;SNOMEDCT|||  
 OR|OR - Operating room|||C0029064|SNOMEDCT|||  
 OR|OT - Operating theatre;Operating Theater;Operating Theatre;Operating  
 theatre;operating theater;operating theaters;operating theatre;operating  
 theatres|C0029064|||C0029064|CHV;NCI;SNOMEDCT|||  
 OR|Ocular retardation|||||1|0.0011|  
 OR|Operating theatre (environment)|||C0029064|SNOMEDCT|||  
 OR|Opioid receptors;opioid  
 receptor|C0034801|||C0034801|CHV;CSP;MSH;MTH;NDFRT|1|0.0009|  
 OR|Or - dosing instruction fragment|||C1706533|MTH;SNOMEDCT|||  
 OR|Or - dosing instruction fragment (qualifier value)|||C1706533|SNOMEDCT|||

OR|Oregon;oregon;Oregon (geographic location)|C0029195|||C0029195|AOD;CHV;LCH;MSH;MTH;NCI;SNOMEDCT|||  
OR|P450 oxidoreductase|||||1|0.0011|  
OR|objective response|||||1|0.0085|  
OR|oblique ridge|||||1|  
OR|odds ratio|C0028873|||C0028873|CHV;MSH;NCI|1|0.908|1  
OR|odds ration|||||1|0.0018|  
OR|odorant receptor|C0164313|||C0164313|MSH;NDFRT|1|0.0037|  
OR|oestrogen receptor|C0034804;C1414461;C1521863|||||1|0.0028|  
OR|oil retention|||||1|  
OR|olfactory receptor|C1518565|||C1518565|AOD;CHV;CSP;FMA|1|0.0068|  
OR|open reduction|C0185373;C2370853|||||1|  
OR|open repair|C0441613|||C0441613|CHV;SNOMEDCT|1|0.002|  
OR|operations research|C0029066|||C0029066|CSP;LCH;MSH|1|0.0016|1  
OR|optic radiation|C0228277;C1281308|||C0228277;C1281308|FMA;SNOMEDCT|||1  
OR|optical rotation|C0029141|||C0029141|CSP;LCH;MSH|1|0.0011|  
OR|or - article|||C1518602|MTH|||  
OR|oral rehydration|C0086904;C0309655|||C0086904;C0309655|CHV;MSH;SNOMEDCT|||1  
OR|orbicularis oris|C0224147;C1304957|||||1|  
OR|oregons|||C0029195|CHV|||  
OR|organ recovery|||||1|  
OR|orienting reaction|||||1|0.0007|  
OR|orienting reflex|||||1|0.0016|1  
OR|orienting response|||||1|0.0062|  
OR|orthopedic|C0029355|||||1|  
OR|orthopedic research|||||1|  
OR|ouabain-resistant|||||1|0.0022|  
OR|outflow rate|||||1|  
OR|outflow resistance|||||1|0.0006|  
OR|ovary reserve|||||1|  
OR|overrefraction|C1688601|||||1|  
OR|ovulation rate|||||1|0.0029|  
OR|own recognizance|||||1|  
OR|oxidized-reduced|||||1|  
OR|oxidoreductase|C0030016;C1537381|||C0030016;C1537381|CHV;CSP;HUGO;MTH;NCI;SNO  
MEDCT|||  
OR|relative risk|C0242492|||||1|0.0007|  
OR|response rate|C0237629|||||1|0.0019|  
OR|right operator|||||1|0.0009|  
OS|BBBG1;OGS1|C2697964;C2936904|||C2697964;C2936904|NCI;OMIM|||  
OS|BONE;Bone;Bone, NOS;Bones;Bones,  
NOS;bone;bones|C0262950;C0391978;C1266908;C1266909|||C0262950|AOD;CHV;CSP;FMA;HL  
7V2.5;LCH;LNC;MSH;NCI;SNOMEDCT;UWDA|||  
OS|Bone (organ);Bone organ;Bone structure;bone structure;bone structures;bones  
structure;bones structures;structure bone;Bones set;Set of bones;Ossa;Skeletal  
bone;skeletal bone;Skeleton system;skeleton system;Systema  
skeletale|C0262950|||C0262950|AOD;CHV;FMA;MTH;SNOMEDCT;UWDA|||  
OS|Bone structure (body structure)|||C0262950|SNOMEDCT|||  
OS|Circumoral region of face;Mouth region;mouth region;Mouth region  
structure;Mouth structure;mouth structure;mouth structures;Oral part of  
face;Oral region of face;Perioral region of face;Regio oralis;Structure of oral  
region of face|C0230028|||C0230028|CHV;FMA;SNOMEDCT;UWDA|||  
OS|FINGER ON X AND Y, MOUSE, HOMOLOG OF|||C1417167|OMIM|||  
OS|FXY;RNF59;TRIM18|C1417167;C2697964|||C1417167;C2697964|HUGO;NCI;OMIM|||  
OS|G syndrome;g syndrome;HYPERTELORISM-HYPOSPADIAS SYNDROME;Hypertelorism-  
hypospadias syndrome;Opitz-Frias syndrome;opitz fria syndrome;opitz-frias

syndrome;TELECANTHUS-HYPOSPADIAS SYNDROME;bbb  
syndrome|C1801950;C2936904|||C2936904|CHV;MTH;OMIM;SNOMEDCT|||  
OS|GBBB1;MID1 wt Allele;XPRF;ZNFXY|C2697964|||C2697964|MTH;NCI|||  
OS|GGGB1;OPITZ BBBG SYNDROME, TYPE I;OPITZ GBBB SYNDROME, TYPE I;OPITZ GBBB  
SYNDROME, X-LINKED;OPITZ SYNDROME;Opitz syndrome;opitz syndrome;opitz  
syndromes;OPITZ SYNDROME, X-LINKED;OPITZ-G SYNDROME, TYPE  
I|C2936904|||C2936904|CHV;OMIM;SNOMEDCT|1|0.0032|  
OS|HYPERTELORISM WITH ESOPHAGEAL ABNORMALITY AND HYPOSPADIAS|||C2936904|OMIM|||  
OS|MID1|C1417167;C2986643|||C1417167|HUGO;NCI;OMIM|||  
OS|MID1 Gene;MID1 gene;MIDLINE 1 RING FINGER  
GENE|C1417167|||C1417167|HUGO;MTH;NCI;OMIM|||  
OS|MIDIN|C1417167;C2697964;C2698218|||C1417167;C2697964|NCI;OMIM|||  
OS|MIDLINE 1|C1417167;C2698218|||C1417167|OMIM|||  
OS|Midline 1 (Opitz/BBB Syndrome) Gene|||C1417167|NCI|||  
OS|Midline 1 (Opitz/BBB Syndrome) wt Allele|||C2697964|NCI|||  
OS|Mouth|C0226896;C0230028;C1267547;C1278910|||C0230028|FMA;SNOMEDCT;UWDA|||  
OS|Mouth region structure (body structure)|||C0230028|SNOMEDCT|||  
OS|OPENING SNAP;Opening snap;opening snap;OS - Opening snap;opening snap  
(OS)|C0232275|||C0232275|CHV;DXP;MTH;SNOMEDCT|||1  
OS|OS;Os;os|C0029383;C0230028;C0262950;C1561953|||C0029383;C0230028;C0232275;C02  
62950;C1417167;C1561953;C1709324;C2697964;C2936904|CHV;FMA;HL7V3.0;HUGO;NCI;OMIM  
;SNOMEDCT;UWDA|||  
OS|OSMIUM;Osmium;Osmium, NOS;osmium;Os - Osmium;Os element;Osmium  
Metallicum|C0029383|||C0029383|AOD;CHV;CSP;LCH;LNC;MSH;NCI;NDFRT;SNOMEDCT|||1  
OS|OSX|C1424900;C2697964;C2936904|||C2697964;C2936904|NCI;OMIM|||  
OS|Ocimum sanctum|C1483721|||1|0.004|  
OS|Omenn syndrome|C1801959;C2700553|||1|0.0036|  
OS|One-Step|C0534010|||1|0.0052|  
OS|Opening snap (finding)|||C0232275|SNOMEDCT|||  
OS|Operating System|C1709324|||C1709324|MTH;NCI|||  
OS|Opitz's (J.M.) syndrome|||C2936904|SNOMEDCT|||  
OS|Opitz-Frias syndrome (disorder)|||C2936904|SNOMEDCT|||  
OS|Oral region|C0230028;C1995016|||C0230028|FMA;MTH|||  
OS|Osmium (substance)|||C0029383|SNOMEDCT|||  
OS|Osmium [Chemical/Ingredient]|||C0029383|NDFRT|||  
OS|Osseous|C0262950;C0391978|||C0262950|NCI|||  
OS|Structure of oral region of face (body structure)|||C0230028|SNOMEDCT|||  
OS|Supernumerary mandibular left central primary  
incisor|C1561953|||C1561953|MTH|||  
OS|core oligosaccharide|||1|0.004|  
OS|left eye|C0229090|1|0.998|||1|0.0056|1  
OS|midline 1 (Opitz/BBB syndrome)|||C1417167|HUGO|||  
OS|occiput-sacrum|||1|  
OS|occupational safety|C0079921|||1|  
OS|oligosaccharide;oligosaccharides|C0028959|||C0028959|CHV;CSP;FMA;NCI;SNOMEDCT  
|1|0.0064|  
OS|oligospermic|||1|  
OS|oligosyndactylism|||1|0.0036|  
OS|open splenectomy|||1|0.0112|1  
OS|open surgery|C0348025|||C0348025|CHV;SNOMEDCT|1|0.0036|1  
OS|ophthalmic solution|C0029083;C2984066|||1|  
OS|opposite-sex|||1|0.0036|  
OS|oral secretion|C1272568|||C1272568|CHV;SNOMEDCT|||  
OS|oral surgery|C0038908;C0524861|||1|  
OS|orbitale superius|||1|  
OS|orthopedic surgery|C0029355;C0162439;C1136201;C1555794|||1|

OS|osteogenic  
sarcoma|C0029463|||C0029463|CHV;COSTAR;CSP;DXP;MSH;NCI;OMIM;PDQ;SNOMEDCT|1|0.0072|1  
OS|osteoid surface|||||||1  
OS|osteosarcoma|C0029463;C0585442;C2697383|||C0029463;C0585442;C2697383|AOD;CHV;COSTAR;CSP;DXP;MEDLINEPLUS;MSH;MTH;NCI;NDFRT;OMIM;PDQ;SNOMEDCT|1|0.0538|1  
OS|osteosclerosis|C0029464|||||||1  
OS|ouabain sensitive;ouabain-sensitive|||||1|0.0076|1  
OS|outer segments|||||||1|0.0261|  
OS|ovarian stimulation|C0949385|||C0949385|CHV;MSH|||  
OS|overall survival|||||||1  
OS|overall survival rate;survival rate|C0038954|||C0038954|NCI|1|0.006|  
OS|overlap syndrome|C0410000|||C0410000|CHV;SNOMEDCT|||  
OS|overshoot|||||1|0.0076|  
OS|oxidative  
stress|C0242606;C0696141|||C0242606;C0696141|AOD;CHV;CSP;MSH;MTH;NCI|1|0.0433|1  
OS|oxygen saturation|C0369768;C0483415|||||||1  
OS|survival|C0038952;C0220921|||||||1|0.7858|  
OS|survival time|C2919552|||||||1|0.0044|  
OS|system|C0449913;C1553451;C1704459|||||||1|0.004|  
OTC|Drugs, Non Prescription;Drugs, Non-Prescription;Drugs, Nonprescription;NON-PRESCRIPTION DRUGS;Non Prescription Drugs;Non-Prescription Drugs;Non-prescription drug;Non-prescription drug, NOS;Non-prescription drugs;Nonprescription Drugs;non prescription drugs;non-prescription drug;non-prescription drugs;nonprescription drug;nonprescription drugs;Drugs, OTC;OTC Drugs;OTC drug;Drugs, Over-the-Counter;Over the Counter Drugs;Over-the-Counter Drugs;over the counter drugs;over-the-counter drug;over-the-counter drugs;Medicines, Over-the-Counter;Over-the-Counter Medicines;Medicines, Patent;Patent Medicines;medicines patent;medicines patents;patent medicine;patent medicines;Nonprescription;nonprescription;OTC Medicines;OTC medicines;OTC products;otc product;otc products;Over the Counter;Over-the-Counter;over the counter;over-the-counter;Over the Counter Product;Over the counter products;Over-the-Counter Product;counter over product;over the counter products;products over the counter;pharmaceutical  
drug|C0013231|1|0.938|C0013231|AOD;CHV;HCPCS;LCH;MEDLINEPLUS;MSH;MTH;NCI;SNOMEDCT|1|0.4599|1  
OTC|L-2-oxothiazolidine-4-carboxylate|C0124869|||||||1|0.0168|  
OTC|L-2-oxothiazolidine-4-carboxylic acid|||||||1|0.0168|  
OTC|MED PATENT;PATENT MED|||||C0013231|MSH|||  
OTC|Misc/exper non-prescript dru|||||C0013231|HCPCS|||  
OTC|Non-prescription drug (product)|||||C0013231|SNOMEDCT|||  
OTC|Non-prescription drug (substance)|||||C0013231|SNOMEDCT|||  
OTC|ORNITHINE CARBAMOYLTRANSFERASE;ornithine carbamoyltransferase;ORNITHINE TRANSCARBAMYLASE;ornithine  
transcarbamylase|C0029279;C1418193|||C1418193|HUGO;OMIM|1|0.2725|  
OTC|OTC|C0013231;C1418193;C2709201|||C0013231;C1418193;C2709201|HUGO;LNC;NCI;OMIM|||  
OTC|OTC - Over The Counter|C2709201|||C2709201|MTH|||  
OTC|OTC Gene;OTC gene;Ornithine Carbamoyltransferase Gene|C1418193|||C1418193|HUGO;LNC;MTH;NCI|||  
OTC|Over the counter products (product)|||||C0013231|SNOMEDCT|||  
OTC|Over the counter products (substance)|||||C0013231|SNOMEDCT|||  
OTC|heart rate-corrected T interval|||||||1  
OTC|occult tumor cell|||||||1  
OTC|open-top chambers|||||||1|0.0079|  
OTC|organotin compound|C0029259|||C0029259|SNOMEDCT|||  
OTC|ornithine transcarbamoylase|C0029279|1|0.062|C0029279|SNOMEDCT|1|0.0228|1

OTC|oval target cell|||||1  
OTC|oxytetracycline|C0030092|||C0030092|CHV;LNC;MSH;MTHFDA;MTHSPL;NCI;NDFRT;RXNORM;SNOMEDCT;USPMG;VANDF|1|0.2032|  
OT|OT|C1418208;C1705587|||C1418208;C1705587|NCI;OMIM|||  
OT|OXT|||C1418208;C1705587|HUGO;NCI;OMIM|||  
OT|OXT Gene;OXT gene;OXYTOCIN--NEUROPHYSIN I;PREPROOXYTOCIN;oxytocin, prepropeptide|C1418208|||C1418208|HUGO;MTH;NCI;OMIM|||  
OT|OXT wt Allele|C1705587|||C1705587|MTH;NCI|||  
OT|OXYTOCIN;oxytocin|C0030095;C1704206|||C0030095;C0523809;C1418208;C1704206|AOD;CHV;CSP;FMA;LCH;LNC;MSH;MTH;MTHSPL;NCI;NDFRT;OMIM;PDQ;RXNORM;SNOMEDCT;USPMG;UWDA;VANDF|1|0.8489|1  
OT|Ocular torsion|||||1|0.0072|  
OT|Oxytocin, Prepro- (Neurophysin I) Gene||||C1418208|NCI|||  
OT|Oxytocin, Prepro- (Neurophysin I) wt Allele||||C1705587|NCI|||  
OT|neurophysin I|C0027897;C1418208|||C1418208|HUGO|||  
OT|object test|||||1  
OT|objective test|||||1  
OT|oblique talus|||||1  
OT|occiput transverse|||||1  
OT|occlusion time|||||1|0.0072|1  
OT|occupational therapist|C0028807;C1610728|||C0028807;C1610728|CHV;HL7V3.0;MTH;NCI;SNOMEDCT|||  
OT|occupational therapy|C1318464|1|1.000|C1318464;C1547993|AOD;CHV;CSP;HL7V2.5;ICD9CM;LCH;LNC;MEDLINEPLUS;MSH;SNOMEDCT|||1  
OT|ocular tension|C0021888|||C0021888|CHV;CSP;MSH;SNOMEDCT|||1  
OT|office treatment|||||1  
OT|old terminology|||||1  
OT|old tuberculin|C0443084|||C0443084|MTH;RXNORM;SNOMEDCT|1|0.0059|  
OT|olfactory threshold|C0597130|||C0597130|CSP|||1  
OT|olfactory tubercle|C0162436;C0917714|||C0162436;C0917714|FMA;MSH;MTH|1|0.0379|1  
OT|oligodendroglial tumor|C1335110|||C1335110|NCI|||  
OT|oligosaccharyl transferase;oligosaccharyltransferase|C0283757;C1413949|||C0283757;C1413949|MSH;OMIM|1|0.0098|  
OT|on treatment|||||1  
OT|operating theatre|C0029064|||C0029064|CHV;NCI;SNOMEDCT|1|0.0046|  
OT|optic tectum|C0228405|||C0228405|CSP;FMA;MSH|1|0.0209|  
OT|optic tract|C0152405;C1269601|||C0152405;C1269601|CHV;CSP;FMA;MSH;NCI;SNOMEDCT;UWDA|1|0.0229|1  
OT|oral temperature|C1532216|||||1  
OT|oral thrush|C0006849|||||1  
OT|oral tolerance|C0597140|||C0597140|CHV;CSP;GO|1|0.0078|  
OT|oral transmucosal|||||1  
OT|organotin|C0029259|||C0029259|CHV;SNOMEDCT|||  
OT|orientation test|||||1  
OT|original tuberculin|||||1  
OT|ornithine transcarbamylase|C0029279;C1418193|||C0029279;C1418193|CHV;CSP;MSH;NCI;NDFRT;OMIM;SNOMEDCT|||  
OT|oro-tracheal|||||1  
OT|orthopedic treatment|||||1  
OT|orthostatic tremor|C2315430|||C2315430|SNOMEDCT|1|0.0118|  
OT|otolaryngology|C0029892;C1555801|||C0029892;C1555801|CHV;HL7V3.0;LCH;LNC;MSH;NCI;SNOMEDCT|||1

OT|otology|C0086746|||C0086746|CHV;MSH|||1  
OT|outer table|||1  
OT|outflow tract|||1|0.015|  
OT|outlier threshold|||1  
OU|Ornstein-Uhlenbeck|||1|0.45|  
OU|both eyes||1|1.000|||1  
OU|each eye|||1  
OU|observation unit|||1|0.55|  
OU|obstructive uropathy|C0178879|||C0178879|CHV;COSTAR;NCI;SNOMEDCT|||  
P0|HMSNIB;MPZ;MPZ gene;MYELIN GLYCOPROTEIN P-  
ZERO|C1417248|||C1417248|HUGO;LNC;MTH;OMIM|||  
P0|L10E;LP0;RPLP0;RIBOSOMAL PHOSPHOPROTEIN, ACIDIC, P0;acidic ribosomal  
phosphoprotein P0;RIBOSOMAL PHOSPHOPROTEIN, LARGE, P0;RPLP0;RPLP0  
gene;RPP0;ribosomal protein, large, P0|C1419691|||C1419691|HUGO;MTH;OMIM|||  
P0|MPP|C0000098;C1417248|||C1417248|OMIM|||  
P0|MYELIN PROTEIN ZERO;myelin protein  
zero|C0071316;C1417248|||C1417248|HUGO;OMIM|||  
P0|MYELIN PROTEIN, PERIPHERAL|C0302243;C1417248|||C1417248|OMIM|||  
P0|P0|C1417248;C1419691|||C1417248;C1419691|HUGO;OMIM|||  
P0|day of birth|||1|0.176|  
P0|isometric force|||1|0.044|  
P0|isometric tension|||1|0.036|  
P0|major myelin glycoprotein|||1|0.02|  
P0|newborn|C0021289;C2239178;C2939425|||1|0.076|  
P0|para 0||1|1.000|||1  
P0|postnatal day 0|||1|0.3|  
P0|pressure|C0033095;C0460139;C1306345|||1|0.056|  
P0|protein zero|||1|0.256|  
P0|tetanic tension|||1|0.036|  
PAC|(drug) PAC||1|0.004|||1  
PAC|APC;apc;apcs|C0033036;C1456795|||C0033036|CHV;DXP;NCI|||  
PAC|ARTIFICIAL CHROMOSOMES BACTERIOPHAGE P 001;BACTERIOPHAGE P 001 ARTIFICIAL  
CHROMOSOMES;CHROMOSOMES ARTIFICIAL BACTERIOPHAGE P 001;CHROMOSOMES BACTERIOPHAGE  
ARTIFICIAL P 001|||C0949780|MSH|||  
PAC|ATRIAL BEAT PREMATURE;Atrial Beat, Premature;Atrial Beats, Premature;Atrial  
premature beats;PREMATURE ATRIAL BEATS;Premature Atrial Beat;Premature Atrial  
Beats;atrial premature beat;atrial premature beats;premature atrial  
beat;premature atrial beats;Atrial Complex, Premature;Atrial Premature  
Complex;Atrial Premature Complexes;Atrial premature complex;PREMATURE ATRIAL  
COMPLEXES;Premature Atrial Complex;Premature Complex, Atrial;Premature  
Complexes, Atrial;Premature atrial complexes;atrial premature complex;atrial  
premature complexes;premature atrial complex;premature atrial complexes;Atrial  
Complices, Premature;Atrial Premature Complices;Premature Atrial  
Complices;Premature Complices, Atrial;Atrial Ectopic Beat;Atrial Ectopic  
Beats;Ectopic Beat, Atrial;Ectopic Beats, Atrial;Ectopic atrial beats;Ectopic  
atrial beats, NOS;atrial ectopic beat;atrial ectopic beats;ectopic atrial  
beats;Atrial Extrasystole;Atrial Extrasystoles;Atrial  
extrasystoles;EXTRASYSTOLES ATRIAL;Extrasystole, Atrial;Extrasystoles,  
Atrial;Atrial Premature Complex (APC);Atrial ectopic;atrial ectopic;atrial  
ectopics;Atrial premature depolarisation;Atrial premature depolarization;Atrial  
premature systoles;premature atrial systole;premature atrial  
systoles;EXTRASYSTOLES SUPRAVENTRICULAR;SUPRAVENTRICULAR  
EXTRASYSTOLES;Supraventricular extrasystoles;supraventricular extrasystole;PAC -  
Premature atrial contraction;Premature Supraventricular Beat;Premature  
Supraventricular Beats;Supraventricular Beat, Premature;Supraventricular Beats,  
Premature;Supraventricular premature beats;supraventricular premature  
beats;Supraventricular Ectopic Beats;Supraventricular ectopic

beats;Supraventricular premature contraction|C0033036|||C0033036|CHV;COSTAR;CST;DXP;ICD9CM;MSH;MTH;NCI;NDFRT;SNOMEDCT|||

PAC|Artificial Chromosome, P1-Derived;Artificial Chromosomes, P1-Derived;Chromosome, P1-Derived Artificial;Chromosomes, P1-Derived Artificial;P1 Derived Artificial Chromosomes;P1-Derived Artificial Chromosome;P1-Derived Artificial Chromosomes;P1-derived Artificial Chromosome;Artificial Chromosomes, P1 Bacteriophage;Bacteriophage P1 Artificial Chromosomes;Chromosomes, Artificial, P1 Bacteriophage;Chromosomes, P1 Bacteriophage Artificial;P1 Bacteriophage Artificial Chromosomes|C0949780|||C0949780|MSH;MTH;NCI|||

PAC|Atrial Contraction, Premature;Atrial Contractions, Premature;Atrial premature contractions;PREMATURE ATRIAL CONTRACTION;Premature Atrial Contraction;Premature Atrial Contractions;Premature atrial contraction;Premature atrial contractions;atrial premature contractions;premature atrial contraction;premature atrial contractions|C0033036;C0488348|1|0.55|C0033036|CHV;COSTAR;LNC;MSH;NDFRT;SNOMEDCT|1|0.0262|1

PAC|Atrial Premature Complexes [Disease/Finding]|||C0033036|NDFRT|||

PAC|Atrial premature complex (disorder)|||C0033036|SNOMEDCT|||

PAC|Atrial premature complex (finding)|||C0033036|SNOMEDCT|||

PAC|Atrial premature complex [Ambiguous]|||C0033036|SNOMEDCT|||

PAC|CAP|C0179586;C1657858;C1706092;C2985259|||C0280547|PDQ|||

PAC|CAP-I;CAP-II;CISCA chemotherapy protocol;CISCA-II;cisplatin/cyclophosphamide/doxorubicin protocol|C0280547|||C0280547|CHV;MTH;NCI;PDQ|||

PAC|CDDP/CTX/DOX|||C0280547|NCI;PDQ|||

PAC|Cisplatin/Cyclophosphamide/Doxorubicin;cisplatin,cyclophosphamide and doxorubicin;cisplatin/cyclophosphamide/doxorubicin|||C0280547|CHV;NCI;PDQ|||

PAC|Ectopic atrial beats (disorder)|||C0033036|SNOMEDCT|||

PAC|Endothelial permeability|||1|0.0236|

PAC|P A 001 BACTERIOPHAGE ARTIFICIAL CHROMOSOMES|||C0949780|MSH|||

PAC|PAC|||C0033036;C0280547;C0700105;C0949780;C2709278|AOD;CHV;CST;LNC;NCI;PDQ|||

PAC|PAC (Chromosome);PACs (Chromosomes)|||C0949780|MSH|||

PAC|PAC (in LOINC)|||C2709278|MTH|||

PAC|Peritoneal adherent cells|||1|0.0183|

PAC|Physical Assessment Center|||1|

PAC|Plasma Arc Curing|||1|0.0236|

PAC|Political action committee;political action committee;political action committee (PAC)|C0700105|||C0700105|AOD;CHV;MTH|||

PAC|Port-A-Cath;Port-a-Cath|C0935727|||1|0.0262|1

PAC|Premature atrial contraction (disorder)|||C0033036|SNOMEDCT|||

PAC|Progress Assessment Chart|||1|

PAC|Supraventricular premature contraction|||C0033036|SNOMEDCT|||

PAC|Supraventricular ectopic beats (disorder)|||C0033036|SNOMEDCT|||

PAC|Supraventricular premature beats (disorder)|||C0033036|SNOMEDCT|||

PAC|paclitaxel|C0144576|||C0144576|CHV;CSP;LNC;MSH;MTH;MTHSPL;NCI;NDFRT;PDQ;RXNORM;SNOMEDCT;VANDF|1|0.0393|

PAC|pancreatic adenocarcinoma|C0281361|||C0281361|CHV;NCI;OMIM|||1

PAC|papular acrodermatitis of childhood|C0263372|||C0263372|MSH;SNOMEDCT|||1

PAC|para-aminoclonidine|C0048038|||C0048038|MSH;NDFRT|||1

PAC|parent-adult-child|||1|

PAC|penicillin acylase|C0030825|||1|0.034|

PAC|perennial allergic conjunctivitis|C0339165|||C0339165|SNOMEDCT|1|0.0288|

PAC|pericarditis, arthropathy, camptodactyly|||1|

PAC|perturbed angular correlation|||1|0.034|

PAC|perturbed angular correlation of gamma-rays|||1|0.0157|

PAC|physician assistant certification||1|0.274|||||  
PAC|picture archiving communication||1|0.050|||||1  
PAC|plasma aldosterone|||||1|0.0445|  
PAC|plasma aldosterone concentration|||||1|  
PAC|polyaluminium chloride;polyaluminum  
chloride|C0051518|||C0051518|MSH|1|0.0209|  
PAC|polycyclic aromatic compounds|||||1|0.0628|  
PAC|post anesthesia care||1|0.094|||||  
PAC|post-acute care|||||1|0.034|  
PAC|powdered activated carbon|||||1|0.1257|  
PAC|preadmission certification|||||1|  
PAC|prematrue auricular contraction|||||1|  
PAC|pressure-assist control|||||1|  
PAC|primary auditory cortex|C2954070|||C2954070|FMA|1|0.0314|  
PAC|prophylactic anticonvulsant|||||1|  
PAC|prostatic adenocarcinoma|C0007112|||C0007112|CHV;PDQ|1|0.034|  
PAC|pulmonary arterial concentration||1|0.002|||||  
PAC|pulmonary artery catheter|C0179790|1|0.002|C0179790|CHV;SNOMEDCT|1|0.2592|1  
PAC|pulmonary artery  
catheterization|C0007438;C0190658|||C0007438;C0190658|CHV;MSH;MTH;NCI|1|0.0288|1  
PAC|pulmonary artery constriction|||||1|0.0209|  
PAC|surface protein antigen|||||1|0.0681|  
PA|2-aminopyridine|C0051326|||||1|0.0021|  
PA|ACIDIC SALIVARY PROLINE-RICH PROTEIN, HaeIII TYPE, 1;PAROTID ACIDIC  
PROTEIN;PRH1;PRH1 gene;PROLINE-RICH PROTEIN, HaeIII SUBFAMILY, 1;proline-rich  
protein HaeIII subfamily 1|C1418892|||C1418892|HUGO;MTH;OMIM|||  
PA|Assistant, Doctor's;Assistants, Doctor's;Doctor Assistants;Doctor's  
Assistant;Doctor's Assistants;doctor assistants;Extender, Physicians';Extenders,  
Physicians';Physician Extenders;Physician's Extenders;Physicians'  
Extender;Physicians' Extenders;physician extender;physician  
extenders;PA;Pa|C0031833|||C0030266;C0030428;C0030853;C0031833;C0205469;C0439473  
;C0681477;C1414426;C1418225;C1418892;C1996865|CHV;HUGO;LNC;MSH;NCI;OMIM;SNOMEDCT  
|||  
PA|Assistant, Physicians';Assistants, Physician;Assistants,  
Physicians';PHYSICIAN ASSISTANT;Physician Assistant;Physician  
Assistants;Physician's Assistants;Physicians Assistants;Physicians'  
Assistant;Physicians' Assistants;Physicians' assistants;physician  
assistant;physician assistants;physician's assistant;physician's  
assistants|C0031833;C3163889|1|0.122|C0031833;C1549987;C1578492;C1704470;C316388  
9|AOD;CHV;CSP;HL7V2.5;HL7V3.0;LCH;MSH;MTH;NCI;SNOMEDCT|1|0.0059|  
PA|Children's Hospital of Philadelphia|||||1|0.0021|  
PA|Children's Hospital of Pittsburgh|||||1|0.0017|  
PA|D-  
penicillamine;penicillamine|C0030817|||C0030817|AOD;CHV;CSP;LCH;MSH;MTHSPL;NCI;N  
DFRT;PDQ;RXNORM;SNOMEDCT;USPMG;VANDF|1|0.0042|  
PA|EPB42;EPB42 gene;Erythrocyte surface protein band  
4.2;MGC116735;MGC116737;PROTEIN 4.2, ERYTHROCYTIC;erythrocyte membrane protein  
band 4.2|C1414426|||C1414426|HUGO;MTH;OMIM|||  
PA|N/m2;N/sq. m;Pascal;pascal;newton per square  
metre|C0439473|||C0439473|HL7V3.0;MTH;NCI;SNOMEDCT|||1  
PA|NIH Program Announcements;Program Announcements, NIH;Program  
Announcement;Program Announcements;program  
announcement|C0681477|||C0681477|AOD;MTH;NCI|||  
PA|P||||C0439473|NCI|||  
PA|PALLID, MOUSE, HOMOLOG OF||||C1418225|OMIM|||  
PA|PALLIDIN;PLDN;PLDN gene|C1418225|||C1418225|HUGO;MTH;OMIM|||  
PA|PAN|C0085999|||C0030266|NCI|||

PA|PANAMA;Panama;panama|C0030266|||C0030266|AOD;CHV;CSP;LCH;MSH;MTH;NCI;SNOMEDCT  
|||  
PA|PARAGUAY;Paraguay;paraguay;PY|C0030428|||C0030428|AOD;CHV;LCH;MSH;MTH;NCI;SNO  
MEDCT|||  
PA|PATHOL|||C0205469|MSH|||  
PA|PM|||C0030266|NCI|||  
PA|PRY|C0030428;C1422358|||C0030428|NCI|||  
PA|Pa (qualifier value)|||C0439473|SNOMEDCT|||  
PA|Panama (geographic location)|||C0030266|SNOMEDCT|||  
PA|Paraguay (geographic location)|||C0030428|SNOMEDCT|||  
PA|Paranoia;paranoia|C1456784|||C1456784|AOD;COSTAR;CSP;CST;DXP;MSH;MTH;NCI;NDFR  
T;OMIM;QMR;SNOMEDCT|1|0.0019|1  
PA|Pathological aspects|C0205469|||C0205469|MTH|||  
PA|Pennsylvania;pennsylvania|C0030853|||C0030853|AOD;CHV;LCH;MSH;MTH;NCI;SNOMEDC  
T|1|0.0029|  
PA|Pennsylvania (geographic location)|||C0030853|SNOMEDCT|||  
PA|Picture Arrangement|||1  
PA|Polyacrylamide;polyacrylamide|C0071499|||C0071499|CHV;CSP;MSH;SNOMEDCT|1|0.00  
27|1  
PA|Polyacrylate;polyacrylate|C0597265|||C0597265|CSP|1|0.005|  
PA|Postero-Anterior;postero-anterior|C1996865|||C1996865|MTH|1|0.0084|  
PA|Pseudoaneurysm;pseudoaneurysm|C0162868;C1510412|||1|0.0032|1  
PA|Pseudomonas aeruginosa|C0033809;C1962990|||1|0.0268|1  
PA|Psoriatic arthritis;psoriatic arthropathy|C0003872|||1|0.0129|  
PA|Pyridylamino|||1|0.0021|  
PA|Pyrophosphate arthropathy;pyrophosphate arthropathy|C1306839|||1|0.0011|1  
PA|University of Pittsburgh|||1|0.0013|  
PA|abscess|C0000833;C0549483;C1550609|||1|0.0032|  
PA|acidic protein|||1|0.0013|  
PA|agreement|C0680240|||1|0.0017|  
PA|alcohol|C0001962;C0001975;C0202304|||1|0.0023|  
PA|alveolar partial pressure|||1  
PA|alveolar pressure;pressure,  
alveolar|C0232010|||C0232010|CHV;SNOMEDCT|1|0.0086|1  
PA|analysis|C0002778;C0936012;C1524024|||1|0.0023|  
PA|apparent permeability coefficient to albumin|||1|0.0002|  
PA|arterial blood pressure|C1272641|||1|0.0032|  
PA|arterial pressure|C0232108;C1272641|||1|0.0187|  
PA|newton/square meter;newton/square metre|||C0439473|SNOMEDCT|||  
PA|nucleus|C0007610|||1|0.0025|  
PA|paleostriatum augmentatum|||1|0.0021|  
PA|pallid|||1|0.0019|  
PA|pallidin homolog (mouse)|||C1418225|HUGO|||  
PA|palmitic  
acid|C0030234|||C0030234|AOD;CHV;FMA;LCH;MSH;NCI;NDFRT;SNOMEDCT;VANDF|||  
PA|pancreatic adenocarcinoma|C0281361|||1|0.0013|  
PA|panic attack;panic  
attacks|C0086769|||C0086769|AOD;CHV;MSH;MTHICD9;NCI;SNOMEDCT|1|0.0025|1  
PA|pantothenic  
acid|C0030342;C0696237;C2700255|||C0030342;C0696237;C2700255|AOD;CHV;MEDLINEPLUS  
;MSH;MTH;MTHSPL;NCI;NDFRT;RXNORM;SNOMEDCT;VANDF|||1  
PA|paralysis  
agitans|C0030567|||C0030567|CHV;COSTAR;CSP;CST;DXP;ICD9CM;MEDLINEPLUS;MSH;NDFRT;  
SNOMEDCT|||1  
PA|paranoid|||1  
PA|parathyroid adenoma|C0262587|||C0262587|CHV;COSTAR;MSH;NCI;OMIM;SNOMEDCT|||  
PA|parietal antibody|||1

PA|partial pressure of alveolar fluid|||||||1  
PA|partial pressure of arterial fluid|||||||1  
PA|particle agglutination|||||1|0.0124|  
PA|particle agglutination assay|||||1|0.0015|  
PA|particle agglutination test|||||1|0.001|  
PA|parvalbumin|C0030616;C1419140|||C0030616;C1419140|CHV;CSP;HUGO;OMIM;SNOMEDCT|  
1|0.0057|  
PA|passive aggressive|||||||1  
PA|passive avoidance|||||1|0.0132|  
PA|paternal aunt|||||||1  
PA|pathologic|C1521733|||||||1  
PA|pathology|C0030664;C0205469;C0677042|||C0030664;C0205469;C0334866;C0677042;C0  
919386|AOD;CHV;CSP;HL7V3.0;LCH;LNC;MSH;MTH;NCI;SNOMEDCT|||1  
PA|peak amplitude|||||||1  
PA|peanut allergy|C0559470|||||||1  
PA|penicillic acid|C0030821|||C0030821|AOD;MSH;NDFRT;SNOMEDCT|||  
PA|penicillin acylase|C0030825|||C0030825|MSH;NDFRT|||  
PA|pentanoic acid|C0068263|||||||1  
PA|perceptual asymmetry|||||1|0.0015|  
PA|performance assessment|||||1|0.0015|  
PA|periapical|C0729269|||||||1  
PA|periarteritis|C0264988|||C0264988|CHV;MTHICD9;SNOMEDCT|||1  
PA|peridural artery|||||||1  
PA|perinatal asphyxia|C0559477|||C0559477|CHV;MTH;SNOMEDCT|1|0.0055|  
PA|periodic acid|C0031068|||C0031068|AOD;CHV;CSP;MSH;NDFRT|||1  
PA|periodontal abscess|C0031085|||||||1  
PA|permeability area|||||||1  
PA|permeability-area product|||||1|0.0013|  
PA|permeability-surface area product|||||1|0.0019|  
PA|pernicious anaemia;pernicious  
anemia|C0002892|||C0002892|AOD;CHV;COSTAR;CSP;ICD9CM;MSH;NCI;OMIM;QMR;SNOMEDCT|1  
|0.0157|1  
PA|peroxidatic activity|||||||1  
PA|persistent asthma|||||||1  
PA|phakic-aphakic|||||||1  
PA|phase angle|||||1|0.0019|  
PA|phenol alcohol|||||||1  
PA|phenylacetate|C0031452;C0220893|||C0031452;C0220893|CHV;CSP;LNC;MSH;MTH;NCI;P  
DQ;RXNORM;SNOMEDCT|1|0.0075|1  
PA|phenylacetic acid|C0070620|||C0070620|CHV;LCH;MSH;NCI;RXNORM;SNOMEDCT|||  
PA|phenylalanine|C0031453|||C0031453|AOD;CHV;CSP;FMA;LCH;LNC;MSH;MTHSPL;NCI;NDFR  
T;RXNORM;SNOMEDCT;VANDF|||  
PA|phenylalkylamine|C0597214|||C0597214|CSP;SNOMEDCT|||  
PA|phonological awareness|||||1|0.0011|  
PA|phosphatidate|C0178797|||C0178797|CSP;LNC|1|0.008|  
PA|phosphatidic acid|C0031610|||C0031610|AOD;MSH;NCI;SNOMEDCT|1|0.1592|1  
PA|phosphoarginine|C0070818|||C0070818|MSH|||1  
PA|phosphoric  
acid|C0031700;C0031702;C1161325|||C0031700;C0031702;C1161325|AOD;CHV;CSP;LCH;MSH  
;MTH;MTHSPL;NCI;NDFRT;RXNORM;SNOMEDCT;VANDF|||  
PA|photo allergy|||||||1  
PA|photoacoustic|||||1|0.0057|  
PA|photoallergy|C0206051|||C0206051|CHV;CSP;MSH;SNOMEDCT|||  
PA|phthalic acid|C0070968|||C0070968|AOD;LCH;MSH|||  
PA|phthalic anhydride|C0070969|||C0070969|LNC;MSH;SNOMEDCT|1|0.0059|1  
PA|physical  
activity|C0026606|||C0026606|AOD;CHV;LNC;MSH;MTH;NCI;SNOMEDCT|1|0.0512|1

PA|physical assistance|||||||1  
PA|physician associates|||0.166||||  
PA|phytic acid|C0031855|||C0031855|CHV;LCH;MSH;NCI;NDFRT;RXNORM|||  
PA|picoampere|||||||1  
PA|picolinic acid|C0071038|||C0071038|AOD;MSH;RXNORM|||  
PA|pilocytic  
astrocytoma|C0334583|||C0334583|CHV;MSH;MTH;NCI;OMIM;SNOMEDCT|1|0.0031|  
PA|pineapple|C0440279;C0475655;C1113644|||||||1  
PA|pipecolic acid|C0031951|||C0031951|MSH;MTH;SNOMEDCT|||  
PA|pituitary adenoma|C0032000|||||||1  
PA|pituitary-adrenal|||||||1|0.0021|1  
PA|plaque area|||||||1|0.0025|  
PA|plasma aldosterone|||||||1  
PA|plasmapheresis|C0032134|||C0032134|AOD;CHV;CSP;LCH;MSH;MTH;NCI;PDQ;SNOMEDCT|1  
|0.0063|  
PA|plasminogen activation|C1622667|||C1622667|GO|1|0.004|  
PA|plasminogen  
activator|C0032144|||C0032144;C0042071|AOD;CHV;CSP;MSH;MTH;NCI;NDFRT;SNOMEDCT|1|  
0.1578|1  
PA|platelet adhesiveness|C0032175|||C0032175|MSH|||1  
PA|platelet  
aggregation|C0032176;C0677599|||C0032176;C0677599|AOD;CHV;CSP;GO;LNC;MSH;MTH;NCI  
;SNOMEDCT|1|0.0153|1  
PA|platelet associated|||||||1  
PA|pleomorphic adenoma|C0026277|||C0026277|CHV;MSH;NCI;SNOMEDCT|1|0.0118|1  
PA|polyadenylation|C0949765|||||1|0.0019|  
PA|polyamide|C0028736|||C0028736|CHV;MSH;NDFRT;SNOMEDCT|1|0.0032|  
PA|polyamine|C0032433|||C0032433|CHV;CSP;SNOMEDCT|1|0.0147|  
PA|polyarteritis|C0264992|||C0264992|CHV;SNOMEDCT|||1  
PA|polyarthrititis|C0162323|||C0162323|AOD;CHV;COSTAR;CSP;CST;DXP;MSH;MTH;NCI;SNOM  
EDCT|||1  
PA|popliteal  
artery|C0032649;C1278953|||C0032649;C1278953|CHV;FMA;LNC;MSH;NCI;SNOMEDCT;UWDA||  
|  
PA|positive affect|||||||1|0.0075|  
PA|positive affectivity|||||||1|0.0017|  
PA|postabsorptive|||||||1|0.0023|  
PA|postaural|C0442167|||C0442167|SNOMEDCT|||1  
PA|posterior-anterior|C1999039|1|0.424|||1|0.0078|1  
PA|posteroanterior|||||||1|0.0273|1  
PA|prealbumin|C0032923|||C0032923|AOD;CHV;LNC;MSH;MTH;NCI;NDFRT;SNOMEDCT|||1  
PA|predictive accuracy|||||||1  
PA|pregnancy associated;pregnancy-associated|||||||1|0.0019|1  
PA|preinfarction  
angina|C0002965;C0086666|||C0002965;C0086666|CHV;MSH;MTHICD9;SNOMEDCT|1|0.0015|  
PA|premature adrenarche|C0342546|||C0342546|CHV;OMIM;SNOMEDCT|1|0.0032|1  
PA|presents again|||||||1  
PA|pressure augmentation|||||||1  
PA|pressure, atrial|C0428877|||||||1  
PA|primary aldosteronism|C1384514|||C1384514|CHV;SNOMEDCT|1|0.0225|1  
PA|primary  
amenorrhea|C0232939|||C0232939|CHV;COSTAR;CSP;MTHICD9;OMIM;SNOMEDCT|||1  
PA|primary anemia|||||||1  
PA|primary angioplasty|||||||1|0.0017|  
PA|prior to admission|||||||1  
PA|proactivator|||||||1  
PA|proanthocyanidin|C0072018|||C0072018|CHV;MSH;MTH;NCI;SNOMEDCT|1|0.0027|1

PA|procainamide|C0033216|||C0033216|AOD;CHV;CSP;LNC;MSH;MTH;NCI;NDFRT;RXNORM;SNO  
MEDCT;USPMG;VANDF|1|0.017|  
PA|professional association|C0680403|||1|1|  
PA|progressive aphasia|C0338457|||1|0.001|  
PA|proinsulin antibody|||1|1|  
PA|prolonged action|||1|1|  
PA|prophylactic antibiotic|C0362063|||1|1|  
PA|propionic  
acid|C0033482;C0072186|||C0033482;C0072186|AOD;CHV;LCH;MSH;MTH;NCI;NDFRT;RXNORM;  
SNOMEDCT;VANDF|1|1|  
PA|propionic acidaemia;propionic  
acidemia|C0268579|||C0268579|CHV;CSP;LNC;MSH;MTH;NCI;NDFRT;OMIM;SNOMEDCT|1|0.006  
3|  
PA|prostate adenocarcinoma|C0007112|||1|0.0013|  
PA|prostate antigen|C1704988|||C1704988|NCI|1|1|  
PA|protactinium|C0033597|||1|1|  
PA|protective antigen|C1443846|||C1443846|SNOMEDCT|1|0.0417|1|  
PA|proteolytic activity|||1|1|  
PA|prothrombin activity|C0200396|||1|1|  
PA|proton affinity|||1|0.0021|  
PA|protrusio acetabuli|C0409495|||C0409495|CHV;MTH;OMIM;SNOMEDCT|1|1|  
PA|psychoanalysis|C0033884;C0392892|||1|1|  
PA|psychoanalyst|C0600090|||C0600090|CHV;SNOMEDCT|1|1|  
PA|psychogenic aspermia|||1|1|  
PA|psychosocial assessment|C1455743|||1|1|  
PA|pubic arch|C0735723|||1|1|  
PA|pullulan acetate|||1|0.0011|  
PA|pulmonary|C0024109;C2707265;C2709248|||1|0.0017|  
PA|pulmonary angiography|C0677490|||C0677490|CHV;SNOMEDCT|1|0.0027|1|  
PA|pulmonary arterial|||1|0.0138|  
PA|pulmonary arterial pressure|C1168098|||C1168098|CHV|1|1|  
PA|pulmonary  
artery|C0034052;C1269026|1|0.276|C0034052;C1269026|AOD;CHV;CSP;FMA;HL7V2.5;LCH;L  
NC;MSH;NCI;SNOMEDCT;UWDA|1|0.1368|1|  
PA|pulmonary atresia|C0242855|||C0242855|CHV;MSH;NDFRT;OMIM;SNOMEDCT|1|0.0042|1|  
PA|pulmonary auscultation||1|0.002|1|1|  
PA|pulmonary autograft|||1|1|  
PA|pulmonaryarterial|||1|1|  
PA|pulpoaxial|||1|1|  
PA|pulse amplitude|||1|0.005|  
PA|pulsus alternans|C0232121|||1|1|  
PA|puromycin aminonucleoside|C0034146|||C0034146|MSH;NDFRT|1|0.0075|1|  
PA|pyloric atresia|C0266159|||1|0.0019|  
PA|pyridylaminated|||1|0.0031|  
PA|pyrrolizidine alkaloid|C0034335|||C0034335|CHV|1|0.0105|1|  
PA|pyruvic acid|C0072802|||C0072802|CHV;MSH;MTH;NDFRT;RXNORM;SNOMEDCT|1|1|  
PA|solitary parathyroid adenoma|||1|0.001|  
PA|yearly|C0332181|||1|1|  
PCA|2-Pyrrolidinone-5-Carboxylic Acid;5-Pyrrolidinone-2-Carboxylic Acid;2-  
Pyrrolidone-5-Carboxylate;2-Pyrrolidone-5-Carboxylic Acid;5 oxoproline;5-  
Oxoproline;5-oxoproline;5-Carboxy-2-Pyrrolidinone;5-Ketoproline;5-L-  
Oxoproline;5-Oxo-L-Proline;5-Oxo-L-proline;L-5-Oxoproline;L-Proline, 5-oxo-;5-  
Oxopyrrolidine-2-Carboxylic Acid;Acid, Pyroglutamic;Pyroglutamic  
Acid;Pyroglutamic acid;pyroglutamic acid;Acid,  
Pyrrolidonecarboxylic;Pyrrolidonecarboxylic Acid;L-Glutamic Acid Gamma-Lactam;L-  
Pyroglutamic Acid;PIDOLIC ACID;Pidolic Acid;pyrrolidone carboxylic  
acid|C0034330|||C0034330|CHV;LNC;MSH;MTH;NCI;NDFRT;RXNORM;SNOMEDCT|1|1|

PCA|4-Chloroamphetamine;Benzeneethanamine, 4-chloro-alpha-methyl-  
;CHLORAMPHETAMINE P;p Chloramphetamine;p-Chloramphetamine;CHLOROAMPHETAMINE P;p  
Chloroamphetamine;p-Chloroamphetamine;p-chloroamphetamine;Para-  
chloroamphetamine;para Chloroamphetamine;para-  
Chloroamphetamine;Parachloroamphetamine;parachloroamphetamine;alpha-Methyl-p-  
chlorophenethylamine|C0030131||C0030131|AOD;MSH;MTH;NCI;NDFRT|1|0.0574|  
PCA|5-Oxoproline (substance)|||C0034330|SNOMEDCT|||  
PCA|A. cerebri posterior|||C0149576|UWDA|||  
PCA|AMYLOIDOSIS IX;Amyloidosis IX;AMYLOIDOSIS, FAMILIAL CUTANEOUS  
LICHEN;AMYLOIDOSIS, PRIMARY CUTANEOUS, 1;AMYLOIDOSIS, PRIMARY LOCALIZED  
CUTANEOUS, 1;Dominant primary localised cutaneous amyloidosis;Dominant primary  
localized cutaneous amyloidosis;Familial amyloidosis cutis;Familial generalised  
dyschromic amyloidosis cutis;Familial generalised dyschromic amyloidosis  
cutis;Familial lichen amyloidosis;LICHEN AMYLOIDOSIS,  
FAMILIAL;PLCA1|C0268398||C0268398|MTH;OMIM;SNOMEDCT|||  
PCA|Analgesia, Patient Controlled;Analgesia, Patient-Controlled;Patient  
Controlled Analgesia;Patient controlled analgesia;Patient-Controlled  
Analgesia;analgesia controlled patient;patient controlled analgesia;patient-  
controlled analgesia;PCA - Patient controlled  
analgesia|C0078944|1|0.996|C0078944|CHV;MSH;MTH;NCI;SNOMEDCT|1|0.1818|1  
PCA|Analyses, Principal Component;Principal Component Analyses;principal  
component analyses|C0429865||C0429865|MSH|1|0.0064|  
PCA|Analysis, Principal Component;Principal Component Analysis;Principal  
Components Analysis;principal component analysis;principal components  
analysis;principal-components  
analysis|C0429865;C1704235||C0429865;C1704235|AOD;MSH;MTH;NCI;SNOMEDCT|1|0.2491  
|1  
PCA|Anaphylaxis, Passive Cutaneous;Cutaneous Anaphylaxis, Passive;Passive  
Cutaneous Anaphylaxis;passive cutaneous anaphylaxis;passive cutaneous  
anaphylaxis (PCA)|C0030625||C0030625|AOD;CHV;MSH;MTH|1|0.1002|1  
PCA|Arteria cerebri posterior|||C0149576|FMA|||  
PCA|Arteries, Posterior Cerebral;Artery, Posterior Cerebral;Cerebral Arteries,  
Posterior;Cerebral Artery, Posterior;Posterior Cerebral Arteries;Posterior  
Cerebral Artery;Posterior cerebral artery;Posterior cerebral artery,  
NOS;posterior cerebral  
artery|C0149576;C1269013||C0149576;C1269013|CHV;FMA;MSH;NCI;SNOMEDCT;UWDA|1|0.0  
41|1  
PCA|CHOANAL ATRESIA, POSTERIOR|C0220723||C0220723|DXP;MTH;OMIM|||  
PCA|Ca2+ concentration|||1|0.0012|  
PCA|Dominant primary localized cutaneous amyloidosis  
(disorder)|||C0268398|SNOMEDCT|||  
PCA|FELINE LEUKEMIA VIRUS SUBGROUP C RECEPTOR 1;FLVCR;FLVCR1;FLVCR1  
gene;MFSD7B;feline leukemia virus subgroup C cellular receptor  
1|C1836722||C1836722|HUGO;MTH;OMIM|||  
PCA|Familial lichen amyloidosis (disorder)|||C0268398|SNOMEDCT|||  
PCA|OXOPROLINE 05|||C0034330|MSH|||  
PCA|PCA;pca|C0268398;C1552962;C1836722||C0030131;C0030625;C0034330;C0078944;C01  
49576;C0220723;C0268398;C0429865;C1549860;C1836722|CHV;HL7V2.5;HUGO;MSH;NCI;OMIM  
|||  
PCA|PCA Message Structure|C1549860||C1549860|MTH|||  
PCA|PCA1|C0268398;C1414407;C1823176||C0268398|OMIM|||  
PCA|PRINCIPAL COMPONENT ANAL|||C0429865|MSH|||  
PCA|Passive cutaneous anaphylactic|||1|0.0066|  
PCA|Patient controlled analgesia (procedure)|||C0078944|SNOMEDCT|||  
PCA|Porous-coated anatomic;porous-coated anatomic|||1|0.0113|1  
PCA|Posterior cortical atrophy|||1|0.0047|  
PCA|Pyroglutamic acid (substance)|||C0034330|SNOMEDCT|||

PCA|Pyrrolidonecarboxylic Acid [Chemical/Ingredient]||||C0034330|NDFRT|||  
PCA|Structure of posterior cerebral artery|C0149576|||C0149576|MTH;SNOMEDCT|||  
PCA|Structure of posterior cerebral artery (body  
structure)||||C0149576|SNOMEDCT|||  
PCA|p-Chloroamphetamine [Chemical/Ingredient]||||C0030131|NDFRT|||  
PCA|pancreatic cancer|C0235974;C0346647;C2984259|||||||1  
PCA|pancreatic carcinoma|C0235974|||||||1  
PCA|para-chloramphetamine|||||||1  
PCA|parenteral controlled analgesia|||||||1  
PCA|parietal cell|C0030559|||||1|0.0019|  
PCA|parietal cell antibodies;parietal cell  
antibody|C0369797;C0863184|||C0369797;C0863184|CHV;LNC;MTH;SNOMEDCT|1|0.0075|1  
PCA|patient care attendant|||0.002|||  
PCA|patient-controlled analgesic|||||1|0.0019|1  
PCA|pentachloroanisole|C0070265|||||1|0.0026|  
PCA|percent cortical area|||||1|0.0009|  
PCA|perchloric acid|C0030981|||C0030981|AOD;MSH;NDFRT;SNOMEDCT|1|0.0151|1  
PCA|percutaneous carotid angiography|||||||1  
PCA|percutaneous carotid angioplasty|||||||1  
PCA|percutaneous carotid arteriogram|||||||1  
PCA|phenylcarboxylic acid|||||||1  
PCA|photocontact allergic|||||||1  
PCA|photocontact allergic allergy|||||||1  
PCA|plasma calcium|C0858090|||||1|0.0014|  
PCA|plasma catecholamines|||||||1  
PCA|plate count agar|||||1|0.0035|  
PCA|portacaval anastomosis;portocaval anastomosis|C0032716|||||1|0.0196|1  
PCA|postcardiac arrest|||||||1  
PCA|postciliary artery|||||||1  
PCA|postconceptional age|||||1|0.0205|1  
PCA|postcoronary arrest|||||||1  
PCA|posterior cerebral|||||1|0.0026|  
PCA|posterior ciliary arteries;posterior ciliary  
artery|C0923318|||C0923318|FMA;UWDA|1|0.0028|  
PCA|posterior communicating aneurysm|||||||1  
PCA|posterior communicating artery|C0149559;C1269014|||||||1  
PCA|posterior  
cricoarytenoid|C0224179;C0448337|||C0224179;C0448337|FMA;MTH;SNOMEDCT;UWDA|1|0.0  
297|1  
PCA|posterior cricoarytenoid muscle|C0224179|||C0224179|SNOMEDCT|1|0.0075|  
PCA|precoronary care area|||||||1  
PCA|prehospital cardiac arrest|||||||1  
PCA|probe competition assay|||||1|0.0009|  
PCA|procoagulant activity|||||1|0.0717|1  
PCA|prostate adenocarcinoma;prostatic adenocarcinoma|C0007112|||||1|0.0061|1  
PCA|prostate  
cancer|C0376358;C0600139;C2984325|||C0376358;C0600139;C2984325|CHV;CSP;MEDLINEPL  
US;MSH;NCI;OMIM;PDQ|1|0.1057|1  
PCA|prostate carcinoma;prostatic  
carcinoma|C0600139|||C0600139|CHV;COSTAR;CST;MTH;NCI;SNOMEDCT|1|0.0239|1  
PCA|protected catheter aspirate|||||||1  
PCA|protein fragment complementation assay|||||1|0.0009|  
PCA|protocatechuate|||||1|0.0047|  
PCA|protocatechuic acid|C0072489|||C0072489|MSH|1|0.0064|  
PCA|weeks post-conceptional age|||||1|0.0024|  
PCI|ACTIVATED PROTEIN C INHIB;PROTEIN C INHIB ACTIVATED||||C0072348|MSH|||

PCI|Acrosomal Serine Protease Inhibitor;Activated Protein C Inhibitor;Activated protein C inhibitor;Protein C Inhibitor, Activated;Protein C inhibitor.activated;PAI-3;Plasma Serine Protease Inhibitor;Plasminogen Activator Inhibitor 3;Plasminogen Activator Inhibitor-3;Plasminogen activator inhibitor-3;Plasminogen Activator Inhibitor III;Plasminogen Activator Inhibitor, Type 3;Type 3 Plasminogen Activator Inhibitor;Serpina5|C0072348|||C0072348|LNC;MSH;NCI;NDFRT;SNOMEDCT|||

PCI|Activated protein C inhibitor (substance)|||C0072348|SNOMEDCT|||

PCI|Alpha-1 Antiproteinase|C0002191;C0072348|||C0072348|NCI|||

PCI|Antitrypsin|C0072348;C1418544|||C0072348|NCI|||

PCI|Isogravimetric capillary pressure|||1|0.0064|

PCI|PAI 03|||C0072348|MSH|||

PCI|PAI3;SERPINA5 Gene;SERPINA5 gene|C1418370|||C1418370|HUGO;MTH;NCI|||

PCI|PCI;pCi|||C0072348;C1418370;C1514496;C1705930;C2347515|NCI;OMIM|||

PCI|PLANH3|C0072348;C1705930|||C0072348;C1705930|NCI|||

PCI|PLASMINOGEN ACTIVATOR INHIB 3|||C0072348|MSH|||

PCI|PLASMINOGEN ACTIVATOR INHIB TYPE 3;TYPE 3 PLASMINOGEN ACTIVATOR INHIB|||C0072348|MSH|||

PCI|PLASMINOGEN ACTIVATOR INHIBITOR 03|||C0072348|MSH|||

PCI|PROCI|C0072348;C1418370;C1705930|||C0072348;C1418370;C1705930|HUGO;NCI|||

PCI|PROTEIN C INHIB|||C0072348|MSH|||

PCI|PROTEIN C INHIBITOR;Protein C Inhibitor;Protein C inhibitor;SERPINA5|C0072348;C1418370|||C0072348;C1418370|HUGO;LNC;MSH;MTH;NCI;NDFRT;OMIM;SNOMEDCT|1|0.0722|

PCI|Phenomenology of Consciousness Inventory|||1|0.0051|

PCI|Photochemical internalisation;photochemical internalization|||1|0.0173|

PCI|Picocurie;picocurie|C2347515|||C2347515|MTH;NCI|||1

PCI|Plasminogen activator inhibitor-3 (substance)|||C0072348|SNOMEDCT|||

PCI|Pneumatosis cystoides intestinalis;pneumatosis cystoides intestinalis|C0032266|||C0032266|DXP;MSH;NDFRT;SNOMEDCT|1|0.039|1

PCI|Potato carboxypeptidase inhibitor|||1|0.0109|

PCI|Premarital Communication Inventory|||1|

PCI|Prophylactic Cranial Irradiation;prophylactic cranial irradiation|C1514496|||C1514496|MTH;NCI|1|0.0786|1

PCI|Protein C Inhibitor [Chemical/Ingredient]|||C0072348|NDFRT|||

PCI|SERPIN PEPTIDASE INHIBITOR, CLADE A, MEMBER 5|||C1418370|OMIM|||

PCI|SERPINA5 wt Allele|C1705930|||C1705930|MTH;NCI|||

PCI|Serine (or Cysteine) Proteinase Inhibitor, Clade A (Alpha-1 Antiproteinase, Antitrypsin), Member 5 Gene|||C1418370|NCI|||

PCI|Serine (or Cysteine) Proteinase Inhibitor, Clade A (Alpha-1 Antiproteinase, Antitrypsin), Member 5 wt Allele|||C1705930|NCI|||

PCI|Serine or Cysteine Proteinase Inhibitor Clade A Member 5|||C0072348|NCI|||

PCI|partial coherence interferometry|||1|0.0115|1

PCI|percutaneous coronary intervention|C1532338|1|0.998|C1532338|SNOMEDCT|1|0.7284|1

PCI|peritoneal cancer index|||1|0.0045|

PCI|physiological cost index|||1|0.016|

PCI|positive chemical ionization|||1|0.007|

PCI|posterior curve intermediate|||1|

PCI|proliferating cell index|||1|0.0032|

PCI|prothrombin consumption index|||1|

PCI|serpin peptidase inhibitor, clade A (alpha-1 antiproteinase, antitrypsin), member 5|||C1418370|HUGO|||

PCP|1-(1-Phenylcyclohexyl)piperidine;Piperidine, 1-(1-phenylcyclohexyl)-|||C0031381|MSH;NDFRT|||

PCP|5-OXOPROLYL PEPTIDASE;PYROGLUTAMYL PEPTIDASE I;pyroglutamyl-peptidase I;PYRROLIDONE-CARBOXYLATE PEPTIDASE|C0034307;C1422070|||C1422070|HUGO;OMIM|||

PCP|ANGIOTENSINASE  
C;PROLYLCARBOXYPEPTIDASE;prolylcarboxypeptidase|C0072114;C1418873|||C0072114;C1418873|MSH;OMIM|||

PCP|Angel Dust;Angel dust;Dust, Angel;angel dust;PCP - Phencyclidine;phencyclidine(PCP)|C0031381|||C0031381|CHV;MSH;NDFRT;SNOMEDCT|||

PCP|Angel dust measurement;PCP Measurement;PCP measurement;Phencyclidine Measurement;Phencyclidine measurement;Phenylcyclohexylpiperidine|C0202445|||C0202445|MTH;NCI;SNOMEDCT|||

PCP|HUMPCP;PRCP;PRCP gene|C1418873|||C1418873|HUGO;MTH;OMIM|||

PCP|Interstitial plasma cell pneumonia;PNEUMONIA, INTERSTITIAL PLASMA CELL;Pneumonia, Interstitial Plasma Cell;interstitial plasma cell pneumonia;PCP - Pneumocystis carinii pneumonia;pneumocystis carinii pneumonia (PCP);PCP - Pneumocystis pneumonia;PJP;PNEUMOCYSTIS CARINII PNEUMONIA;PNEUMONIA, PNEUMOCYSTIS CARINII;Pneumocystis Carinii Pneumonia;Pneumocystis carinii Pneumonia;Pneumocystis carinii pneumonia;Pneumonia, Pneumocystis carinii;Pneumonias, Pneumocystis carinii;pneumocystis carinii pneumonia;PNEUMOCYSTIS PNEUMONIA;PNEUMONIA, PNEUMOCYSTIS;Pneumocystis Pneumonia;Pneumocystis Pneumonias;Pneumocystis pneumonia;Pneumonia, Pneumocystis;Pneumonias, Pneumocystis;pneumocystis pneumonia;Pneumocystoses;Pneumocystosis;pneumocystosis;Pneumocystosis jiroveci pneumonia;Pneumocystosis pneumonia;Pneumonia due to Pneumocystis carinii;Pulmonary pneumocystosis|C0032305|||C0032305|CHV;COSTAR;CSP;DXP;ICD9CM;LCH;MSH;MTH;MTHICD9;NCI;NDFRT;QMR;SNOMEDCT|1|0.332|

PCP|PCP;Pcp|||C0030855;C0031381;C0032305;C0033131;C0202445;C1418873;C1422070;C1744653|AOD;CHV;CSP;GO;HUGO;LNC;NCI;OMIM;SNOMEDCT|||

PCP|PCP - Pentachlorophenol;pentachlorophenol (PCP);Pentachlorophenol;Phenol, pentachloro-;pentachlorophenol|C0030855|||C0030855|CHV;LCH;LNC;MSH;MTH;NDFRT;SNOMEDCT|1|0.1764|1

PCP|PCP - Primary care physician;Physician, Primary Care;Physicians, Primary Care;Primary Care Physician;Primary Care Physicians;Primary care physician;care physician primary;care physicians primary;primary care physician;primary care physicians;primary physician care|C0033131|1|0.222|C0033131|CHV;CSP;HL7V3.0;MSH;MTH;SNOMEDCT|1|0.0252|1

PCP|PGP|C1418520;C1422070|||C1422070|HUGO;OMIM|||

PCP|PGP I;PGP-I;PGPEP1;PGPEP1 gene;PGPI|C1422070|||C1422070|HUGO;MTH;OMIM|||

PCP|PHENCYCLIDINE;Phencyclidine;phencyclidine;phencyclidines|C0031381;C0202445;C2919094|1|0.186|C0031381;C0202445|AOD;CHV;CSP;LCH;LNC;MSH;MTH;NCI;NDFRT;SNOMEDCT;VANDF|1|0.3795|1

PCP|Pentachlorophenol (substance)|||C0030855|SNOMEDCT|||

PCP|Pentachlorophenol [Chemical/Ingredient]|||C0030855|NDFRT|||

PCP|Phencyclidine (substance)|||C0031381|SNOMEDCT|||

PCP|Phencyclidine [Chemical/Ingredient]|||C0031381|NDFRT|||

PCP|Phencyclidine measurement (procedure)|||C0202445|SNOMEDCT|||

PCP|Phencyclidine substance of abuse|||C0031381|SNOMEDCT|||

PCP|Phencyclidine substance of abuse (substance)|||C0031381|SNOMEDCT|||

PCP|Pneumocystis|C0032305;C0597258|||C0032305|NCI|||

PCP|Pneumocystis Jiroveci Pneumonia;Pneumocystis jiroveci pneumonia|C0032305;C1535939|1|0.588|C0032305|NCI|||1

PCP|Pneumocystis carinii|C0032276;C0182833;C0320385|||1|0.0094|

PCP|Pneumocystis carinii pneumonia (disorder)|||C0032305|SNOMEDCT|||

PCP|Pneumocystis carinii pneumonitis|||1|0.0044|

PCP|Pneumocystosis (disorder)|||C0032305|SNOMEDCT|||

PCP|Pneumocystosis jiroveci pneumonia (disorder)|||C0032305|SNOMEDCT|||

PCP|Pneumocytosis|||C0032305|SNOMEDCT|||

PCP|Pneumonia, Pneumocystis [Disease/Finding]|||C0032305|NDFRT|||

PCP|Primary care physician (occupation)|||C0033131|SNOMEDCT|||  
PCP|Procollagen C-proteinase|C1412804|||1|0.0035|  
PCP|Pulmonary pneumocystosis (disorder)|||C0032305|SNOMEDCT|||  
PCP|[3H]Phencyclidine|||1|0.0038|  
PCP|aminoacylproline carboxypeptidase activity|||C1744653|GO|||  
PCP|lysosomal Pro-Xaa carboxypeptidase activity|||C1744653|GO|||  
PCP|palliative care program|||1|  
PCP|parachlorophenate|||1|  
PCP|parachlorophenol|C0048197||C0048197|MSH;MTH;NCI;NDFRT;RXNORM;SNOMEDCT;VANDF  
|||  
PCP|patient care plan|C0030678|||1|  
PCP|peptidyl carrier protein|||1|0.0063|  
PCP|peptidylprolylamino acid carboxypeptidase activity|||C1744653|GO|||  
PCP|peripheral coronary pressure|||1|  
PCP|persistent cough and phlegm|||1|  
PCP|phencyclidine (PCP) test|||C0202445|CHV|||  
PCP|phencyclidine hydrochloride|C0282301|||1|0.0057|  
PCP|phenol-chloroform-petroleum ether|||1|0.0031|  
PCP|planar cell polarity|||1|0.0173|  
PCP|pneumococcal capsular polysaccharide|||1|0.0031|  
PCP|pneumocystic pneumonia|||1|  
PCP|pollen-coat protein|||1|  
PCP|postoperative constrictive pericarditis|||1|  
PCP|primary care  
provider|C1547431;C2735025;C2735026||C1547431;C2735025;C2735026|HL7V2.5;LNC;MTH  
|1|0.0132|1|  
PCP|procollagen peptide|C0443754|||1|  
PCP|proline carboxypeptidase activity|||C1744653|GO|||  
PCP|prolyl carboxypeptidase activity|||C1744653|GO|||  
PCP|prolylcarboxypeptidase (angiotensinase C)|||C1418873|HUGO|||  
PCP|protein C activation peptide|C0072347|||1|0.0019|  
PCP|pulmonary capillary pressure|||1|0.0123|1|  
PCP|pulse cytophotometry|||1|  
PCP|pyrrolidone carboxyl peptidase|||1|0.0028|  
PCP|serine-type Pro-X carboxypeptidase activity|C1744653||C1744653|GO;MTH|||  
PCR|CR|||C0677874|NCI|||  
PCR|Complete Remission;In complete remission;complete remission;Pathological  
Complete Remission;complete response;full  
remission|C0677874|||C0677874|AOD;CHV;MTH;NCI;SNOMEDCT|1|0.0007|  
PCR|In complete remission (qualifier value)|||C0677874|SNOMEDCT|||  
PCR|PCR;pCR|C0032520;C0677874||C0032520;C0677874|AOD;CHV;CSP;MSH;NCI;PDQ|||  
PCR|PCR - Polymerase chain reaction;polymerase chain reaction (PCR);Polymerase  
Chain Reaction;Polymerase Chain Reactions;Polymerase chain reaction;Reaction,  
Polymerase Chain;Reactions, Polymerase Chain;polymerase chain  
reaction|C0032520|1|1|C0032520|AOD;CHV;CSP;HL7V3.0;MSH;MTH;NCI;PDQ;SNOMEDCT|1|0.  
983|1|  
PCR|Polymerase chain reaction (qualifier value)|||C0032520|SNOMEDCT|||  
PCR|Principal Component Regression|||1|0.0022|  
PCR|enzymatic amplification|||1|0.0004|  
PCR|pathologic complete response|||1|0.002|  
PCR|pathologically confirmed complete remission|||1|  
PCR|patient care report|||1|  
PCR|patient contact record|||1|  
PCR|percutaneous coronary revascularization|||1|  
PCR|phosphocreatine|C0031634||C0031634|AOD;CHV;CSP;MSH;NDFRT;SNOMEDCT|1|0.0003|  
1|  
PCR|phosphocreatinine|C0070826|||1|0.0005|

PCR|photoconvulsive response|1  
 PCR|plaque control record|1|0.0003|  
 PCR|plasma clearance rate|1  
 PCR|plasma creatinine|C1278055|1|0.001|  
 PCR|plasma creatinine concentration|1|0.0004|  
 PCR|polymerase chain|1|0.0004|  
 PCR|polymerase chain reaction amplification|1|0.0006|  
 PCR|polymerase chain reaction assay|1|0.0009|  
 PCR|polymerase chain reaction method|1|0.0011|  
 PCR|polymerase chain reaction technique|1|0.0011|  
 PCR|postcompression remodeling|1  
 PCR|probable causal relationship|1  
 PCR|progressive condylar resorption|1  
 PCR|protein catabolic rate|1|0.0046|1  
 PCR|psychiatric case register|1|0.0004|  
 PDA|DUCTUS ARTERIOSUS PATENT;DUCTUS ARTERIOSUS, PATENT;Ductus Arteriosus, Patent;PATENT DUCTUS ARTERIOSUS;Patent Ductus Arteriosus;Patent ductus arteriosus;arteriosus ductus patent;patent arteriosus ductus;patent ductus arteriosus;PDA - Patent ductus arteriosus;PDA1;Patency of the Ductus Arteriosus;Patent arterial duct;Patent ductus Botalli;Patent ductus arteriosus - persisting type;Persistent ductus arteriosus;ductus arteriosus persistent;persistent ductus arteriosus;arteriosis ductus patent;patent ductus arteriosis|C0013274|1|0.276|C0013274|AOD;CCS;CHV;COSTAR;CSP;CST;DXP;ICD9CM;MSH;MTH;MTHICD9;NCI;NDFRT;OMIM;QMR;SNOMEDCT|1|0.7188|1  
 PDA|Dorsal aortic blood pressure|1|0.0063|  
 PDA|Ductus Arteriosus, Patent [Disease/Finding]|C0013274|NDFRT||  
 PDA|PDA|C0013274;C0226047||C0013274;C0226047|FMA;OMIM;UWDA||  
 PDA|Patent ductus arteriosus (disorder)|C0013274|SNOMEDCT||  
 PDA|Patent ductus arteriosus - persisting type (disorder)|C0013274|SNOMEDCT||  
 PDA|Personal Digital Assistant;personal digital assistant|C1136134||C1136134|CHV;MSH;MTH|1|0.0875|1  
 PDA|Population and Community Development Association|1|0.0135|  
 PDA|Posterior descending artery;posterior descending artery;posterior descending artery (PDA)|C0226047;C0500492|1|0.722|C0226047;C0500492|CHV;FMA;SNOMEDCT;UWDA|1|0.0198|1  
 PDA|Posterior descending branch of right coronary artery;Posterior descending coronary artery;Posterior interventricular artery;Posterior interventricular branch of right coronary artery;Right posterior interventricular artery;Structure of posterior descending branch of right coronary artery;posterior interventricular artery (PIV)|C0226047||C0226047|CHV;FMA;MTH;SNOMEDCT;UWDA||  
 PDA|Ramus interventricularis posterior||C0226047|UWDA||  
 PDA|Ramus interventricularis posterior (Arteria coronaria dextra)||C0226047|FMA||  
 PDA|Structure of posterior descending branch of right coronary artery (body structure)||C0226047|SNOMEDCT||  
 PDA|cis-2,3-piperidine dicarboxylic acid|1|0.0187|  
 PDA|pancreatic ductal adenocarcinoma|C1335302||C1335302|MTH;NCI|1|0.0052|  
 PDA|pancreaticoduodenal artery|C1709455||1|0.0125|  
 PDA|panic disorder and agoraphobia;panic disorder with agoraphobia|C0236800||C0236800|CHV;CSP;MTHICD9;SNOMEDCT|1|0.0073|  
 PDA|parenteral drug abuser|1  
 PDA|pathological demand avoidance|1  
 PDA|patient distress alarm|1  
 PDA|pediatric allergy|1

PDA|pericardial diaphragmatic adhesion|||||1  
PDA|phenylenediamine|C0031468|||C0031468|AOD;CHV;CSP;NDFRT;VANDF|||  
PDA|phorbol 12,13-diacetate|||||1|0.0333|  
PDA|photodiode array|||||1|0.0292|  
PDA|plantar digital artery|C0226481;C1279877|||||1  
PDA|polydiacetylene|C0218502|||C0218502|MSH|||  
PDA|polymorphic delta activity|||||1|0.0042|1  
PDA|poorly differentiated adenocarcinoma|||||1  
PDA|potato dextrose agar|||||1|0.0323|  
PDA|predialyzed human albumin|||||1  
PDA|prolonged depolarizing afterpotential|||||1|0.0115|  
PDA|property damage accident|||||1  
PDA|pulmonary disease anemia|||||1  
PD|(device) PD||1|0.012|||||  
PD|(drug) PD||1|0.006|||||  
PD|PALLADIUM;Palladium;Palladium, NOS;palladium;Palladium Metallicum;Pd -  
Palladium;Pd  
element|C0030230|||C0030230|AOD;CHV;CSP;LCH;LNC;MSH;MTH;NCI;NDFRT;SNOMEDCT|||1  
PD|PARK|C0562547;C3160718|||C3160718|OMIM|||  
PD|PARKINSON DISEASE, LATE-ONSET|C3160718|||C3160718|OMIM|||  
PD|Pd;Pd|C0030230;C2362652;C3160718|||C0030230;C1524059;C2362652;C3160718|MSH;NC  
I;OMIM;SNOMEDCT|||  
PD|PHARMACOL|||C1524059|MSH|||  
PD|Palladium (substance)|||C0030230|SNOMEDCT|||  
PD|Palladium [Chemical/Ingredient]|||C0030230|NDFRT|||  
PD|Pancreas divisum;pancreas  
divisum|C0266270|||C0266270|CHV;MTHMST;SNOMEDCT|1|0.0016|1  
PD|Parkinson disease;Parkinson's  
disease|C0030567;C1521736;C2681933|1|0.002|||1|0.5496|1  
PD|Parkinson's disease with dementia|||||1|0.0003|  
PD|Parkinsonism|C0242422|||||1|0.0009|  
PD|Perfusion defect|||||1|0.0009|  
PD|Phosducin|C0084024;C1335199|||||1|0.0011|  
PD|Possible|C0332149;C1705910;C2362652|||C2362652|SNOMEDCT|||  
PD|Possible diagnosis;Possibly|C2362652|||C2362652|MTH;SNOMEDCT|||  
PD|Possible diagnosis (contextual qualifier)|||C2362652|SNOMEDCT|||  
PD|Possible diagnosis (contextual qualifier) (qualifier  
value)|||C2362652|SNOMEDCT|||  
PD|Postnatal Day|||||1|0.0243|  
PD|Prenatal diagnosis;prenatal  
diagnosis|C0033053|||C0033053|AOD;CHV;CSP;LCH;MSH|1|0.0023|  
PD|Preterm Delivery|C0151526|||||1|0.0006|  
PD|Prisoner's Dilemma;prisoner's dilemma|C0033166|||C0033166|MSH|1|0.0011|  
PD|Prolidase deficiency|C0268532|||||1|0.0008|  
PD|Psychopathic deviate;psychopathic deviate|||||1|0.0017|1  
PD|after pancreaticoduodenectomy|||||1|0.001|  
PD|after pancreatoduodenectomy|||||1|0.0014|  
PD|along the proximodistal|||||1|0.0008|  
PD|cell membrane potential|C0311434|||||1|0.0007|  
PD|coronary artery|C0205042;C1269008|||||1|0.0006|  
PD|cyclic nucleotide phosphodiesterase|C1413553|||||1|0.0006|  
PD|depression|C0011570;C0011581;C0344315;C0460137|||||1|0.001|  
PD|diastolic pressure|C0428883|||C0428883|CHV;MSH;NCI|1|0.0007|  
PD|diffusional water permeability|||||1|0.0014|  
PD|disease of bone|C0005940|||||1|0.0011|  
PD|disease progression;progression disease|C0242656;C1947900|||||1|0.001|1  
PD|duration|C0449238;C2926735|||||1|0.0009|

PD|interpupillary distance|C1275637|||C1275637|SNOMEDCT|||  
PD|mechanism of action|C0031327;C1524059|||C1524059|MSH|||  
PD|mechanism of action qualifier;mode of action|C1524059|||C1524059|MSH;MTH|||  
PD|paired domain|||||1|0.0017|  
PD|pancreatic  
duct|C0030288;C1269003|1|0.016|C0030288;C1269003|CHV;CSP;FMA;LCH;LNC;MSH;MTH;NCI  
;SNOMEDCT;UWDA|1|0.0015|1  
PD|pancreaticoduodenectomy;pancreatoduodenectomy|C0085162|||C0085162|CHV;CSP;MSH  
;NCI;SNOMEDCT|||1  
PD|panic  
disorder|C0030319;C1868649|||C0030319;C1868649|AOD;CHV;COSTAR;CSP;DXP;MEDLINEPLU  
S;MSH;MTH;NCI;NDFRT;OMIM;SNOMEDCT|1|0.0419|1  
PD|papilla diameter|||||1|  
PD|paralyzing dose|||||1|  
PD|parkinsonian|||||1|0.001|  
PD|parkinsonian dementia|||||1|  
PD|paroxysmal discharge|||||1|  
PD|pars distalis|||||1|0.0066|1  
PD|patent ductus||1|0.002|||||1  
PD|patient day|||||1|  
PD|patient demonstration|||||1|  
PD|patients|C0030705|||||1|0.0017|  
PD|pediatric dose|||||1|  
PD|pediatrics|C0030755|||||1|  
PD|percutaneous disectomy|C0206080|||||1|  
PD|percutaneous drain|||||1|  
PD|percutaneous drainage|||||1|0.0012|  
PD|period|C0439531;C1948053|||||1|  
PD|periodontal  
disease|C0031090|||C0031090|AOD;CHV;COSTAR;CSP;LCH;MEDLINEPLUS;MSH;NCI;OMIM;SNOM  
EDCT|||  
PD|peripheral dose|||||1|0.0009|  
PD|peritoneal dialysate|C0353714|||||1|0.0013|  
PD|peritoneal  
dialysis|C0031139;C1555974|1|0.818|C0031139;C1706534|AOD;CCS;CHV;DXP;ICD9CM;LCH;  
MEDLINEPLUS;MSH;MTH;NCI;SNOMEDCT|1|0.1391|1  
PD|peritoneal drainage|||||1|0.0008|  
PD|persistent diarrhea;persistent diarrhoea|C0743188|||||1|0.0024|  
PD|personality  
disorder|C0031212|1|0.002|C0031212|AOD;CHV;COSTAR;CSP;CST;DXP;ICPC;MSH;NCI;SNOME  
DCT|1|0.0182|1  
PD|pharmacodynamic|C0851347;C1709518|||C0851347;C1709518|CHV;NCI|||  
PD|pharmacodynamics|C0243145;C0851347|||C0243145;C0851347|AOD;CHV;CSP;MSH;MTH;NC  
I|||1  
PD|pharmacokinetic (PK)-pharmacodynamic|||||1|0.0009|  
PD|pharmacology|C0031330;C1524059|||C1524059|MSH|||  
PD|phenyldichloroarsine|C0070673|||||1|  
PD|phosphate dehydrogenase||1|0.018|||||1  
PD|phosphate depletion|||||1|0.0023|  
PD|photosensitivity dermatitis|C0031762|||||1|  
PD|physical diagnosis|||||1|  
PD|pirfenidone|C0298067|||||1|0.0009|  
PD|plasma defect|||||1|  
PD|plasma desorption|||||1|0.0011|  
PD|plasmodesma;plasmodesmata|C1135842|||C1135842|GO|1|0.0019|  
PD|platelet deposition|||||1|0.0006|  
PD|pneumatic dilatation|||||1|0.0007|

PD|pneumatic dilation|||||1|0.0009|  
PD|pocket depth|||||1|  
PD|police department||1|0.028|||||  
PD|poorly differentiated|C0205617|||C0205617|CHV;MTH;NCI;SNOMEDCT|1|0.0019|1  
PD|population doublings|||||1|0.0068|  
PD|porphobilinogen deaminase|C0032706;C1415597|||||1|  
PD|postdischarge|||||1|  
PD|posterior descending||1|0.068|||||1  
PD|posterior division|||||1|  
PD|postnasal drainage|||||1|  
PD|postural drainage|C0086915|||C0086915|CHV;MSH;MTHICD9;SNOMEDCT|1|0.0011|1  
PD|potential difference|||||1|0.0848|1  
PD|potential difference across the cell membrane|||||1|0.0009|  
PD|power Doppler|||||1|0.0049|  
PD|power density|||||1|0.0012|  
PD|prednisolone|C0032950|||||1|0.0016|  
PD|preferred direction|||||1|0.0009|  
PD|present disease|||||1|  
PD|pressor dose|||||1|  
PD|pressure dressing|C1289828|||||1|  
PD|primary dendrite|||||1|  
PD|prism diopter;prism diopters;prism dioptres|C0439487|1|0.006|||1|0.0079|1  
PD|probing depth|C1317646|||C1317646|CHV;LNC|1|0.0392|1  
PD|probing pocket depth|||||1|0.0021|  
PD|problem drinker|C0687725|||||1|  
PD|process diagnostic|||||1|  
PD|progressed|C1272688|||||1|0.0011|  
PD|progressive disease|C0677932;C1335499|||C0677932;C1335499|MTH;NCI;OMIM|||1|  
PD|prostatodynia|C0240812|||||1|  
PD|protein|C0033684|||||1|0.0009|  
PD|protein  
degradation|C0597297;C0597304;C1623036|||C0597297;C0597304;C1623036|CHV;CSP;GO;M  
SH;NCI|1|0.0013|1  
PD|protein deposition|C0333584|||||1|0.0005|  
PD|protein deprived|||||1|  
PD|protein diet|C0452269|||||1|  
PD|proton density|||||1|0.0033|  
PD|provocation dose|||||1|  
PD|proximal-distal|||||1|0.0014|  
PD|pseudodeficiency|||||1|0.0016|  
PD|psychiatric disorder|C0004936|||C0004936|AOD;CHV;NCI;SNOMEDCT|||  
PD|psychological distress|C0815107|||C0815107|AOD;CHV|||  
PD|psychotic dementia|||||1|  
PD|psychotic depression|C0270458|||||1|  
PD|pulmonary disease|C0024115;C1555769|||||1|  
PD|pulpodistal|||||1|  
PD|pulse duration|||||1|  
PD|pulsed Doppler|C0242846|||||1|0.0022|1  
PD|pulsed diastolic|||||1|  
PD|pupil diameter|C0489618|||C0489618|CHV;LNC|||1|  
PD|pupillary diameter|||||1|0.001|  
PD|pupillary distance|C0946328|||||1|  
PD|pure dysarthria|||||1|  
PD|pyloric dilator|||||1|0.0047|1  
PD|pyridostigmine|C0034261|||C0034261|CHV;CSP;LNC;MSH;NCI;NDFRT;RXNORM;SNOMEDCT;  
USPMG;VANDF|1|0.0046|

PEEP|End-Expiratory Pressure, Positive;End-Expiratory Pressures, Positive;Positive End Expiratory Pressure;Positive End-Expiratory Pressure;Positive End-Expiratory Pressures;Positive end expiratory pressure;Pressure, Positive End-Expiratory;Pressure.positive end expiratory;Pressures, Positive End-Expiratory;positive end expiratory pressure;positive end-expiratory pressure;PEEP;peep;peeps;PEEP - Positive end expiratory pressure;positive end expiratory pressure (PEEP);Positive Pressure Respiration;Positive-Pressure Respiration;Positive-Pressure Respirations;Respiration, Positive-Pressure;Respirations, Positive-Pressure;positive pressure respiration;positive pressure breathing|C0032740|1|1|C0032740|AOD;CHV;CSP;LNC;MSH;MTH;SNOMEDCT|1|0.9694|1  
PEEP|Positive Pressure Ventilation;Positive-Pressure Ventilation;Positive-Pressure Ventilations;Ventilation, Positive-Pressure;Ventilations, Positive-Pressure|C0021778;C0032740|||C0032740|MSH|||  
PEEP|Positive end expiratory pressure (observable entity)|||C0032740|SNOMEDCT|||  
PEEP|peak end-expiratory pressure|||||||1  
PEEP|positive and expiratory pressure|||||||1|0.0161|  
PEEP|positive end-expiratory pressure ventilation|||||||1|0.0145|  
PEG|1,2 Propanediol;1,2-Propanediol||||C0072225|MSH;NCI;NDFRT|||  
PEG|1,2-Dihydroxypropane||||C0072225|NCI|||  
PEG|Endoscopic gastrostomy;endoscopic gastrostomy;PEG (procedure);peg procedure;PEG - Percutaneous endoscopic gastrostomy;Percutaneous [endoscopic] gastrostomy [PEG];percutaneous endoscopic gastrostomy (PEG);Percutaneous endoscopic gastrostomy;percutaneous endoscopic gastrostomy;Percutaneous gastrostomy;percutaneous gastrostomy;Percutaneous transabdominal gastrostomy|C0176751|1|1|C0176751|CHV;ICD9CM;LNC;MTH;MTHICD9;MTHMST;SNOMEDCT|1|0.2255|1  
PEG|Ethanol, 2,2'-(oxybis(2,1-ethanediyloxy)bis-||||C0032478|NCI|||  
PEG|Glycol 400, Polyethylene;POLYETHYLENE GLYCOL 400;Polyethylene Glycol 400;polyethylene glycol 400;PEG-400;Peg 400;peg 400;PEO 400;PEO-400;POLYETHYLENE GLYCOL 400 [VA Product]|C0032478|||C0032478|CHV;MSH;MTH;MTHSPL;NCI;NDFRT;RXNORM;VANDF|1|0.0044|  
PEG|Glycol, Polyethylene;Glycol, polyethylene;Glycols, Polyethylene;POLYETHYLENE GLYCOL;Polyethylene Glycol;Polyethylene Glycols;Polyethylene glycol;Polyethylene glycol, NOS;Polyethyleneglycol;glycol polyethylene;glycol, polyethylene;polyethylene glycol;polyethylene glycols;Oxide, Polyethylene;Oxides, Polyethylene;Polyethylene Oxide;Polyethylene Oxides;polyethylene oxide;Polyethyleneoxide;Polyethyleneoxides|C0032478;C0032483|||C0032478;C0032483|AOD;CHV;CSP;MSH;MTH;MTHSPL;NCI;NDFRT;PDQ;RXNORM;SNOMEDCT;VANDF|1|0.7265|1  
PEG|Glycol, Propylene;PROPYLENE GLYCOL;Propylene Glycol;Propylene glycol;propylene glycol;propyleneglycol;Propylene glycol preparation|C0072225|||C0072225|CHV;CSP;LNC;MSH;MTH;MTHSPL;NCI;NDFRT;RXNORM;SNOMEDCT;VANDF|||  
PEG|Macrogol;Macrogols;macrogol;macrogols;PEG - Polyethylene glycol;POLYOXYETHYLENE;Polyoxyethylene;Polyoxyethylenes;polyoxyethylene;Polyethylene glycol product|C0032483|||C0032483|CHV;MSH;NDFRT;SNOMEDCT;VANDF|||  
PEG|Macrogol (substance)|||C0032483|SNOMEDCT|||  
PEG|PEG;peg|||C0032478;C0032483;C0072225;C0176751|CHV;CSP;LNC;MTHICD9;MTHMST;NCI|||  
PEG|POLYETHYLENE GLYCOL 400 @ @ UNIDENTIFIED;POLYETHYLENE GLYCOL 400 UNIDENTIFIED|||C0032478|RXNORM|||  
PEG|POLYETHYLENE GLYCOL 400 LIQUID|C0032478;C1178139|||C0032478|NDFRT;VANDF|||  
PEG|PROPANEDIOL 01 02|||C0072225|MSH|||  
PEG|Patient Evaluation Grid|||||||1  
PEG|Percu endosc gastrostomy||||C0176751|ICD9CM|||

PEG|Percutaneous endoscopic gastrostomy (procedure)||||C0176751|SNOMEDCT|||  
PEG|Percutaneous gastrostomy (procedure)||||C0176751|MTHMST|||  
PEG|Poly(oxyethylene)||||C0032478|NCI|||  
PEG|Polyethylene Glycols [Chemical/Ingredient]||||C0032483|NDFRT|||  
PEG|Polyethylene glycol (substance)||||C0032483|SNOMEDCT|||  
PEG|Polyethylene glycol product (product)||||C0032483|SNOMEDCT|||  
PEG|Polyethylene glycol product (substance)||||C0032483|SNOMEDCT|||  
PEG|Propan-1,2-Diol||||C0072225|MSH;NDFRT|||  
PEG|Propylene Glycol [Chemical/Ingredient]||||C0072225|NDFRT|||  
PEG|Propylene glycol (product)||||C0072225|SNOMEDCT|||  
PEG|Propylene glycol (substance)||||C0072225|SNOMEDCT|||  
PEG|pegylated|||||1|0.0044|1  
PEG|percutaneous endoluminal gastrostomy|||||||1  
PEG|pericyte edema generation|||||||1  
PEG|pneumoencephalogram;pneumoencephalography|C0032279|||C0032279|AOD;CHV;CSP;LC  
H;MSH;SNOMEDCT|1|0.008|1  
PEG|pneumonencephalograph|||||||1  
PEG|pneumonencephalography|||||||1  
PEG|poly(ethyleneglycol)|||||1|0.0068|  
PEG|polyethylene glycol 4000|C0032479|||||1|0.0052|  
PEG|polyethylene glycol 6000|C0030775|||||1|0.01|  
PEG|polyethylene glycol 8000|C0030776|||||1|0.004|  
PEG|polyethylene glycol solution|||||1|0.0016|  
PEG|polyethylenglycol|||||1|0.0036|  
PEG|propanediol|C0033437;C0072225|||C0072225|CSP|||  
PE|ACE inhibitor perindopril|||||1|0.0014|  
PE|ADAPTIN, BETA-3A;ADTB3A;AP3B1;AP3B1 gene;HPS2  
GENE|C1412446|||C1412446|HUGO;MTH;OMIM|||  
PE|ADAPTOR-RELATED PROTEIN COMPLEX 3, BETA-1 SUBUNIT;adaptor-related protein  
complex 3, beta 1 subunit||||C1412446|HUGO;OMIM|||  
PE|CDDP/VP-16||||C0078414|NCI;PDQ|||  
PE|Cephalin;Cephalins;cephalin;Phosphatidyl ethanolamine;phosphatidyl  
ethanolamine;phosphatidyl-  
ethanolamine;Phosphatidylethanolamine;Phosphatidylethanolamines;phosphatidyletha  
nolamine;phosphatidylethanolamines|C0031618;C1450468|||C0031618;C1450468|AOD;CHV  
;CSP;FMA;LNC;MSH;MTH;NCI;NDFRT;RXNORM;SNOMEDCT|1|0.01|1  
PE|Cisplatin/Etoposide;cisplatin and etoposide;cisplatin etoposide;cisplatin-  
etoposide;cisplatin/etoposide;P-VP protocol;VP-P protocol;VP-P chemotherapy  
protocol;VP-Plat;VPP;cisplatin/etoposide  
protocol|C0078414|||C0078414|CHV;MSH;MTH;NCI;PDQ|1|0.0109|  
PE|EP||||C0078414|PDQ|||  
PE|Ethanolamine Phosphoglycerides;Ethanolamine  
phosphoglyceride;Phosphoglycerides,  
Ethanolamine;Ethanolamineglycerophospholipids|C0031618|||C0031618|MSH;NDFRT;SNOM  
EDCT|||  
PE|Ever told by doctor that you had pulmonary embolus||||C2926590|LNC|||  
PE|Ever told by doctor that you had pulmonary  
embolus:Find:Pt:^Patient:Ord||||C2926590|LNC|||  
PE|Ever told by doctor that you had pulmonary embolus:Finding:Point in  
time:^Patient:Ordinal||||C2926590|LNC;MTH|||  
PE|HPS2||||C1412446|HUGO;OMIM|||  
PE|PE||||C0031238;C0031618;C0078414;C1412446;C1744699;C2926590|AOD;LNC;NCI;OMIM;  
PDQ|||  
PE|PEARL, MOUSE, HOMOLOG OF||||C1412446|OMIM|||  
PE|PER||||C0031238|NCI|||  
PE|PERU;Peru;peru|C0031238|||C0031238|AOD;CHV;CSP;LCH;MSH;MTH;NCI;SNOMEDCT|||  
PE|PVp||||C0078414|NCI;PDQ|||

PE|Pemphigus erythematosus|C0263312|||||1|0.0041|  
PE|Peru (geographic location)|||C0031238|SNOMEDCT|||  
PE|Phosphatidyl ethanolamine (substance)|||C0031618|SNOMEDCT|||  
PE|Phosphatidylethanolamines [Chemical/Ingredient]|||C0031618|NDFRT|||  
PE|Phosphoethanolamine;phosphoethanolamine|C0031618;C0070939|||C0031618;C0070939  
|CHV;LNC;MSH;MTH;SNOMEDCT|1|0.0127|  
PE|Physical Exam|C0031809;C0804816;C1744699|||C1744699|NCI|||  
PE|Physical Exam Domain|C1744699|||C1744699|MTH;NCI|||  
PE|Proenkephalin;proenkephalin|C0072068;C1418457|||C0072068;C1418457|HUGO;MSH;MT  
H;OMIM|1|0.0141|  
PE|Proestrus;proestrus|C0033274;C2960704|||C0033274;C2960704|GO;MSH;MTH;SNOMEDCT  
|1|0.0059|  
PE|Pseudo-exfoliation|||||1|0.005|  
PE|Pseudomonas exotoxin|||||1|0.0518|1  
PE|PÃ©clet number|||||1|  
PE|after phacoemulsification|||||1|0.0027|  
PE|agonist phenylephrine|||||1|0.0268|  
PE|beta-phenylethylamine|C0070559|||C0070559|MSH;SNOMEDCT|1|0.005|  
PE|cisplatin and etoposide chemotherapy protocol|||||C0078414|CHV|||  
PE|days postexposure|||||1|0.005|  
PE|early promoter|||||1|0.0023|  
PE|elastase|C0030306;C0699918|||||1|0.0086|  
PE|element|C0013879;C1705248|||||1|0.005|  
PE|epithelial cells|C0014597;C1273342;C2699513|||||1|0.0059|  
PE|error positivity|||||1|0.0023|  
PE|errors|C0743559|||||1|0.0059|  
PE|esophageal pressure|C0232531|||||1|0.0027|  
PE|expiratory pressure|||||1|  
PE|extract|C2828366|||||1|0.0254|  
PE|pancreatic extract|||||1|  
PE|panendoscopy|C0679547|||||1|  
PE|paper electrophoresis|C0013861|||C0013861|AOD;CSP;MSH|||1  
PE|parallel elastic|||||1|  
PE|parasitized erythrocytes|||||1|0.0045|  
PE|parietal endoderm|||||1|0.0095|  
PE|partial epilepsy|C0014547|||C0014547|CHV;MSH;NDFRT;SNOMEDCT|1|0.0032|1  
PE|pectinesterase|C0070205|||C0070205|MSH;MTH;SNOMEDCT|1|0.0059|  
PE|pectus  
excavatum|C0016842|||C0016842|CHV;COSTAR;DXP;ICD9CM;MSH;NDFRT;OMIM;SNOMEDCT|1|0.  
0082|  
PE|pedal edema|C0574002|||||1|  
PE|pelvic examination|C0200045|||C0200045|CHV;MSH;MTHICD9;NCI;SNOMEDCT|||1  
PE|penile erection|C0030847|||C0030847|AOD;CHV;GO;MSH;SNOMEDCT|1|0.0109|1  
PE|percutaneous endoscopic|||||1|  
PE|pericardial  
effusion|C0031039;C1253937|||C0031039;C1253937|CHV;COSTAR;CST;DXP;MEDLINEPLUS;MS  
H;MTH;NCI;NDFRT;OMIM;SNOMEDCT;UWDA|1|0.0173|1  
PE|perindopril|C0136123|||C0136123|CHV;MSH;NCI;NDFRT;RXNORM;SNOMEDCT;USPMG;VANDF  
|||  
PE|peritoneal exudate|C0003962|||C0003962|CSP|1|0.0218|1  
PE|periventricular hypothalamic nucleus|C1283308|||||1|0.0027|  
PE|periventricular nucleus|C0003741|||C0003741|FMA|1|0.0041|  
PE|permeability|C0031164|||||1|0.0045|  
PE|persistent estrus|||||1|0.005|  
PE|perus|||C0031238|CHV|||  
PE|perylene|C0031243|||||1|

PE|petroleum  
ether|C0068407;C0303762|||C0068407;C0303762|AOD;CHV;CSP;MSH;SNOMEDCT|1|0.0059|  
PE|phacoemulsification|C0282545|||C0282545|CHV;MSH;SNOMEDCT|||1  
PE|pharyngoesophageal|||1|0.0064|1  
PE|phase encoding|||1  
PE|phenylephrine|C0031469|||C0031469|AOD;CHV;CSP;LNC;MSH;MTHSPL;NCI;NDFRT;RXNORM  
;SNOMEDCT;USPMG;VANDF|||  
PE|phenylephrine  
hydrochloride|C0031470|||C0031470|CHV;MSH;MTHSPL;NCI;NDFRT;RXNORM;SNOMEDCT;USPMG  
;VANDF|||  
PE|phenylethylamine|C0031399|||C0031399|AOD;CHV;CSP|||  
PE|phorbol esters|C0031586|||1|0.0023|  
PE|phosphorylethanolamine|C0070939|||C0070939|MSH|1|0.0082|  
PE|photographic effect|||1  
PE|phycoerythrin|C0031789|||C0031789|CSP;MSH;NDFRT;SNOMEDCT|||1  
PE|physical education|C0031805|||C0031805|CHV;MSH|1|0.0223|1  
PE|physical evaluation|||1  
PE|physical  
examination|C0031809|||C0031809|AIR;AOD;AOT;CHV;LNC;MSH;MTH;NCI;SNOMEDCT|1|0.020  
4|1  
PE|physical exercise|C0015259|||C0015259|AOD;CHV;MSH;SNOMEDCT|1|0.0045|1  
PE|physiologic ecology|||1  
PE|phytoestrogens|C0071011|||1|0.0041|  
PE|pigment epithelial;pigmented epithelial|||1|0.0168|  
PE|pigment epithelium;pigmented epithelium|C1519082|||C1519082|NCI|1|0.0241|1  
PE|pigmented ciliary epithelial|||1|0.0055|  
PE|placental extract|C0032048|||C0032048|CHV|||  
PE|plasma epinephrine|||1|0.0036|  
PE|plasma  
exchange|C0032113;C0032134|||C0032113;C0032134|AOD;CHV;MSH;MTH;NCI;PDQ;SNOMEDCT|  
1|0.1608|1  
PE|plasma extravasation|||1|0.0068|  
PE|plating efficiency|||1|0.02|1  
PE|pleiotropic functional defect|||1  
PE|pleural  
effusion|C0032227;C1253943|1|0.002|C0032227;C1253943|AOD;CHV;COSTAR;CST;MEDLINEP  
LUS;MSH;NCI;NDFRT;OMIM;SNOMEDCT;UWDA|1|0.0232|1  
PE|pneumatic equalization|||1  
PE|point of entry|||1  
PE|polychromatic erythrocytes|||1|0.0036|  
PE|polyelectrolyte|||1|0.0059|  
PE|polyethylene|C0032487;C0137914|||C0032487;C0137914|AOD;CHV;CSP;LCH;MSH;MTH;ND  
FRT;SNOMEDCT;VANDF|1|0.105|1  
PE|polynuclear eosinophil|||1  
PE|porcine pancreatic endocrine|||1|0.0027|  
PE|portal embolization|||1  
PE|portoenterostomy|C0032722|||C0032722|CHV;MSH;SNOMEDCT|1|0.0041|  
PE|post-exposure|||1|0.0077|  
PE|potential energy|C0678538|||C0678538|AOD;NCI|1|0.0059|1  
PE|powdered extract|||1  
PE|power of exclusion|||1|0.0041|  
PE|pre-  
eclampsia;preeclampsia|C0032914|||C0032914|CHV;MSH;MTH;NDFRT;SNOMEDCT|1|0.0691|1  
PE|precedence effect|C0599694|||C0599694|CSP|1|0.0045|  
PE|prediction error|||1|0.0041|  
PE|preeclamptic|||1|0.0073|  
PE|preexcitation|C0032915|||1

PE|pregnenolone|C0033016;C0373704|||||1|0.0045|  
PE|premature  
ejaculation|C0033038|||C0033038|AOD;CHV;COSTAR;ICD9CM;NCI;SNOMEDCT|1|0.0182|1  
PE|preoperative portal embolization|||||1|0.0018|  
PE|prescription error|||||||1  
PE|present examination|||||||1  
PE|pressure equalization||1|0.178|||||1  
PE|pressure on expiration|||||||1  
PE|prior to exposure|||||||1  
PE|probability of exclusion|||||1|0.005|  
PE|probable error|||||||1  
PE|probe excision|||||||1  
PE|proliferative enteritis|||||1|0.0045|  
PE|proliferative enteropathy|||||1|0.0045|  
PE|prolonged exposure|||||1|0.0036|  
PE|prolyl endopeptidase|C0072132;C1418885|||||1|0.0036|  
PE|protective efficacy|||||1|0.005|  
PE|protein excretion|||||||1  
PE|pseudoephedrine|C0033798;C0524257|||C0033798;C0524257|CHV;LNC;MSH;MTH;MTHSPL;  
NCI;NDFRT;RXNORM;SNOMEDCT;VANDF|||  
PE|pseudoexfoliation|||||1|0.0041|  
PE|psychotic event|||||||1  
PE|pulmonary  
edema|C0034063|||C0034063|AOD;CHV;COSTAR;CSP;CST;DXP;LCH;MSH;MTH;NCI;NDFRT;SNOME  
DCT|1|0.0145|1  
PE|pulmonary emboli;pulmonary embolus;pulmonary  
embolism|C0034065|1|0.816|C0034065|CHV;COSTAR;CSP;CST;DXP;ICPC;LCH;LNC;MEDLINEPL  
US;MSH;MTH;MTHICD9;NCI;NDFRT;OMIM;SNOMEDCT|1|0.0458|1  
PE|pulmonary  
emphysema|C0034067|||C0034067|CHV;MEDLINEPLUS;MSH;MTH;NCI;NDFRT;QMR;SNOMEDCT|1|0  
.0082|1  
PE|pulmonary thromboembolism|C0524702;C2709204|||||1|0.0064|  
PE|push enteroscopy|C0399620|||C0399620|SNOMEDCT|||  
PE|pyramidal eminence|C1186249|||||||1  
PE|pyroelectric|||||||1  
PE|pyrogenic exotoxin|||||||1  
PERRL|PERRL;Pupils Equal Round and Reactive to Light  
Result|C2143305|||C2143305|NCI|||  
PERRL|Pupils Equal, Round and Reactive to Light|||C2143305|NCI|||  
PERRL|pupils equal, round, react to light||1|1.000|||||1  
PET|Animal, Companion;Animals, Companion;Companion Animal;Companion Animals;Pet  
Animal;pet animal;pets (animal)|C0031268|||C0031268|AOD;CHV;MSH;MTH|||  
PET|FDG-PET|C0032743;C0872169|||C0032743|NCI|||  
PET|Imaging, PET;PET imaging;imaging pet;pet imaging;Medical Imaging, Positron  
Emission Tomography;PET - Positron emission tomography;Positron emission  
tomography (PET);positron-emission tomography (PET);PET Scan;PET Scans;PET  
scan;PET scan, NOS;Scan, PET;Scans, PET;pet scan;pet scans;Positron Emission  
Tomography;Positron emission tomography;Positron emission tomography,  
NOS;Positron-Emission Tomography;Tomography, Positron Emission;Tomography,  
Positron-Emission;positron emission tomography;positron-emission  
tomography;Positron Emission Tomography Scan;positron emission tomography  
scan;Positron emission tomographic imaging;Positron emission tomographic imaging  
-  
action|C0032743|1|1|C0032743|AOD;CHV;CSP;HL7V2.5;HL7V3.0;LNC;MEDLINEPLUS;MSH;MTH  
;MTHHH;NCI;PDQ;SNOMEDCT|1|0.8997|1  
PET|PET;Pet;Pets;pet;pets|C0031268;C1456682|||C0031268;C0032743|AOD;CHV;CSP;MSH;  
NCI|||

PET|PETT||||C0032743|CSP|||  
 PET|POSITRON EMISS TOMOGR;TOMOGR POSITRON EMISS||||C0032743|MSH|||  
 PET|Parent Effectiveness Training|||||||1  
 PET|Peritoneal Equilibration Test;peritoneal equilibration  
 test|C0430949;C0878801|||C0430949;C0878801|MTH;MTHICD9;SNOMEDCT|1|0.0272|1  
 PET|Polyethyleneterephthalate;polyethylene  
 terephthalate|C0032485|||C0032485|CHV;MSH;NDFRT|1|0.0166|1  
 PET|Positron emission tomographic imaging - action (qualifier  
 value)||||C0032743|SNOMEDCT|||  
 PET|Positron emission tomography (procedure)||||C0032743|SNOMEDCT|||  
 PET|Professional Employment Test|||||||1  
 PET|functional|C0205245;C0542341;C2700217|||||1|0.0016|  
 PET|pancreatic endocrine tumor;pancreatic endocrine  
 tumors|C0242363|||C0242363|CHV;SNOMEDCT|1|0.0009|  
 PET|paraffin-embedded tissue|||||1|0.0017|1  
 PET|patulous eustachian tube|C0155434|||||1|0.0008|  
 PET|peak ejection time|||||||1  
 PET|pear-shaped extension tube|||||||1  
 PET|petrolatum|C0031262|||||1|0.0018|  
 PET|phosphatidylethanol|C0070787|||||1|0.0112|  
 PET|photoinduced electron transfer|||||1|0.0051|  
 PET|polyester|C0032474|||C0032474|CHV;MSH;SNOMEDCT|1|0.0013|  
 PET|polyethylene terephthalate|||||1|0.0007|  
 PET|polyethylene tube|||||||1  
 PET|poor exercise tolerance|C3149603|||||||1  
 PET|positron emission tomograph|||||1|0.0027|  
 PET|positron emission tomographic|||||1|0.0262|  
 PET|postexposure treatment|||||||1  
 PET|pre-eclamptic toxemia|C0032914|||||1|0.0014|  
 PET|predominantly epithelial thymoma|||||||1  
 PET|preeclamptic toxemia|C0032914;C2931877|||C2931877|MSH|||1  
 PET|pressure equalization tube|||||||1  
 PET|problem elicitation technique|||||||1  
 PET|progressive exercise test|C0430513|||||||1  
 PET|proton magnetic resonance spectroscopic  
 imaging|C0032743;C1522706|||C0032743|NCI|||  
 PET|pulmonary endodermal tumor|||||||1  
 PET|treatment|C0039798;C0087111;C1522326;C1533734;C1705169;C3161471|||||1|0.0012  
 |  
 PFO|patent foramen  
 ovale|C0016522;C2939192|1|1.000|C0016522|CHV;MSH;NCI;NDFRT;OMIM;SNOMEDCT|1|0.894  
 7|1  
 PFO|perfluoro-N-octane;perfluoro-n-octane|C0166273|||||1|0.0263|1  
 PFO|perfluorooctanoate|C2964281|||C2964281|LNC;MSH|||  
 PFO|perfringolysin O|C0110119|||||1|0.0614|  
 PFO|persistent foramen ovale|C1397674|||C1397674|OMIM|||  
 PFO|plantar fasciitis orthosis|||||||1  
 PFO|pyruvate|C0034354;C0244104|||||1|0.0175|  
 PH|1 Chromosome, Ph;1 Chromosomes, Ph;Chromosome, Ph 1;Chromosomes, Ph 1;Ph 1  
 Chromosome;Ph 1 Chromosomes;ph 1 chromosome;Chromosome, Ph1;Chromosomes, Ph1;Ph1  
 Chromosome;Ph1 Chromosomes;Chromosome, Philadelphia;Philadelphia  
 Chromosome;Philadelphia chromosome;chromosome philadelphia;chromosomes  
 philadelphia;philadelphia  
 chromosome|C0031526|||C0031526|CHV;CSP;MSH;MTH;NCI;NDFRT|1|0.0748|  
 PH|Concentration, Hydrogen-Ion;Concentrations, Hydrogen-Ion;Hydrogen Ion  
 Concentration;Hydrogen ion concentration;Hydrogen-Ion Concentration;Hydrogen-Ion  
 Concentrations;Hydrogen-ion concentration;hydrogen ion concentration;H+

concentration;H<sup>+</sup> concentration;potential of  
Hydrogen|C0020283|1|1|C0020283|CSP;LCH;MSH;MTH;NCI;SNOMEDCT|1|0.0086|1  
PH|Finding of pH;pH - finding;pH level|C1304686|||C1304686|CHV;MTH;SNOMEDCT|||  
PH|Finding of pH (finding)|||C1304686|SNOMEDCT|||  
PH|H/O: medical history NOS|||C0455458|SNOMEDCT|||  
PH|H/O: medical history NOS (situation)|||C0455458|SNOMEDCT|||  
PH|H<sup><sup></sup></sup> concentration|||C0020283|SNOMEDCT|||  
PH|History  
of;history|C0019664;C0019665;C0262512;C0262926;C1705255;C2004062|||C0332119|LNC;  
SNOMEDCT|1|0.0045|  
PH|History of (situation)|||C0332119|SNOMEDCT|||  
PH|History of - medical history NOS|||C0455458|SNOMEDCT|||  
PH|History of - medical history NOS (context-dependent  
category)|||C0455458|SNOMEDCT|||  
PH|History of - medical history NOS (situation)|||C0455458|SNOMEDCT|||  
PH|Hydrogen ion concentration (function)|||C0020283|SNOMEDCT|||  
PH|Hydrogen ion concentration (observable entity)|||C0020283|SNOMEDCT|||  
PH|Hydrogen ion concentration, function (observable  
entity)|||C0020283|SNOMEDCT|||  
PH|Intracellular pH|||1|0.004|  
PH|PAH|||C1418251|HUGO;OMIM|||  
PH|PAH gene|C1418251|||C1418251|HUGO;LNC;MTH|||  
PH|PH;Ph; [pH] ;pH;ph|C0020283;C0450407;C0450408;C0450409;C1304686|||C0020283;C003  
1526;C0031529;C0031843;C0332119;C0455458;C1304686;C1418251|CHV;CSP;HL7V3.0;HUGO;  
LNC;MSH;MTH;NCI;SNOMEDCT|||  
PH|PHAA CHROMOSOME|||C0031526|MSH|||  
PH|PHENYLALANINE HYDROXYLASE;phenylalanine hydroxylase;phenylalanine 4-  
monooxygenase|C0031456;C1418251|||C0031456;C1418251|CHV;HUGO;LNC;MSH;MTH;NDFRT;O  
MIM;SNOMEDCT|1|0.0071|1  
PH|PHILIPPINES;Philippines;philippines;Philipines;Phillipines;Phillippines|C0031  
529|||C0031529|AOD;CHV;CSP;LCH;MSH;MTH;NCI;SNOMEDCT|||  
PH|PHL|||C0031529|NCI|||  
PH|PHYSIOL|||C0031843|MSH|||  
PH|PMH - past medical history;health  
history|C0455458|||C0455458|CHV;MTH;SNOMEDCT|||  
PH|Past history of;past  
history|C0332119|||C0332119;C0455458|CHV;MTH;SNOMEDCT|||1  
PH|Past history of (context-dependent category)|||C0332119|SNOMEDCT|||  
PH|Past history of (situation)|||C0332119|SNOMEDCT|||  
PH|Past medical history;Past medical history  
of|C0262926;C0455458|||C0455458|LNC;SNOMEDCT|||  
PH|Past medical history (situation)|||C0455458|SNOMEDCT|||  
PH|Past medical history of (contextual qualifier) (context-dependent  
category)|||C0455458|SNOMEDCT|||  
PH|Periventricular heterotopia;periventricular  
heterotopia|C2678104|||C2678104|OMIM|1|0.0045|  
PH|Philadelphia|C0031525|||1|0.1647|  
PH|Philadelphia Chromosome [Disease/Finding]|||C0031526|NDFRT|||  
PH|Philippines (geographic location)|||C0031529|SNOMEDCT|||  
PH|Pleckstrin homology|||1|0.2602|  
PH|RP|C1538326|||C0031529|NCI|||  
PH|acidity|C0001128;C0847097;C0920750|||1|0.0081|  
PH|function|C0031843;C0542341;C0700205;C1705273|||C0031843|MSH|||  
PH|hydrochloride|C1512523|||1|0.0066|  
PH|hydrogen-Ion concentration (pH)|||C0020283|CHV|||  
PH|hyperplasia|C0020507|||1|0.0091|  
PH|palmar hyperhidrosis|C1856953|||C1856953|OMIM|1|0.0086|

PH|parathyroid hormone|C0030520;C1882913|||||||1  
PH|parenchymal hematoma|||||||1  
PH|parenchymal hemorrhage|C0747264|||||||1  
PH|partial hepatectomy|C0193398|||C0193398|ICD9CM;MTH;NCI;SNOMEDCT|||1  
PH|partial hysterectomy|C1270947|||||||1  
PH|partially hepatectomized|||||||1|0.0045|  
PH|passive hemagglutination|||||||1  
PH|peak height|||||||1|0.004|  
PH|peliosis hepatitis|C0030781|||||||1  
PH|perianal herpes|||||||1  
PH|persistent hepatitis|||||||1  
PH|personal history|C0262926;C0424945|||||||1  
PH|pharmacopeia|C0376689|||||||1  
PH|phase|C0205390|||||||1  
PH|phenanthrene|C0031367|||||||1  
PH|phenol|C0031428;C0070570|||C0031428;C0070570;C1556058|CHV;CSP;HL7V2.5;HL7V3.0  
;LNC;MSH;MTH;MTHSPL;NCI;NDFRT;RXNORM;SNOMEDCT;VANDF|1|0.0101|  
PH|phenol hydroxylase|C0070571|||C0070571|MSH;SNOMEDCT|||  
PH|phentolamine|C0031448|||C0031448|AOD;CHV;CSP;LCH;MSH;MTH;NCI;NDFRT;RXNORM;SNO  
MEDCT;USPMG;VANDF|1|0.0096|  
PH|phenyl|C2945751|||||||1  
PH|phenylephrine|C0031469|||||||1|0.0061|  
PH|phenylhydrazine|C0031479|||C0031479|CHV;CSP;MSH;RXNORM;SNOMEDCT|1|0.0061|  
PH|phial|C0184301;C1533199;C1706497|||||||1  
PH|phote|||||||1  
PH|physiological aspects|C0031843|||C0031843|MTH|||  
PH|physiology|C0031842;C0031843|||C0031843|MSH|||  
PH|physostigmine|C0031849|||C0031849|AOD;CHV;CSP;MSH;MTH;NCI;NDFRT;RXNORM;SNOMED  
CT;USPMG;VANDF|1|0.0056|  
PH|pinhole|C0450042|||||||1  
PH|polycythemia hypertonica|C0541719;C2242785|||||||1  
PH|polyhomeotic|C0137798|||C0137798|NCI|1|0.0147|  
PH|poor health|C0683321|||||||1  
PH|porphyria hepatica|||||||1  
PH|portal  
hypertension|C0020541|||C0020541|AOD;CHV;COSTAR;CSP;DXP;ICD9CM;MSH;NCI;OMIM;SNOM  
EDCT|||  
PH|posterior|C0205095|||||||1|0.0056|  
PH|posterior hypothalamic  
nucleus|C0228385;C1289574|||C0228385;C1289574|FMA;SNOMEDCT|1|0.0051|  
PH|posterior hypothalamus|C0020670|||C0020670|FMA;MSH|1|0.0273|1  
PH|postural  
hypotension|C0020651|||C0020651|CHV;COSTAR;CSP;CST;ICPC;MSH;NCI;OMIM;SNOMEDCT|1|  
0.0101|  
PH|prepositus hypoglossi|||||||1|0.0131|  
PH|previous history|||||||1  
PH|primary  
hyperoxaluria|C0020501|||C0020501|CSP;DXP;MSH;MTHICD9;NDFRT;SNOMEDCT|1|0.0157|  
PH|primary  
hyperparathyroidism|C0221002|||C0221002|CHV;ICD9CM;MSH;NCI;NDFRT;SNOMEDCT|1|0.00  
45|1  
PH|primary hypertension|C0085580|||C0085580|AOD;CHV;CSP;NCI;SNOMEDCT|||  
PH|primary hypogonadism|C0022735;C0948896;C1384582|||||||1  
PH|prolyl 4-hydroxylase|C0033384;C1622631|||||||1|0.0121|  
PH|prolyl hydroxylase;prolylhydroxylase|C0033384|||C0033384|MSH;NDFRT|1|0.0147|1  
PH|proportional hazards|||||||1|0.0086|  
PH|prostatic hypertrophy|C0005001;C1739363;C2937421|||||||1

PH|pseudohermaphroditism|C0033804|||||1  
PH|pubic hair|C0221988;C1305636||||1|0.0056|1  
PH|pubic hair stage|C0429608|||C0429608|SNOMEDCT|||  
PH|public  
health|C0034019;C0699943|||C0034019;C0699943;C1552283|AOD;CHV;CSP;HL7V3.0;LCH;LNC;MSH;NCI|1|0.0035|1  
PH|pulmonary arterial  
hypertension|C0152171;C2973725|||C0152171;C2973725|MEDLINEPLUS;MSH;MTH;OMIM|||  
PH|pulmonary  
hemorrhage|C0151701|||C0151701|CHV;CST;MTH;NCI;OMIM;SNOMEDCT|1|0.0106|  
PH|pulmonary  
hypertension|C0020542;C1963220|||C0020542;C1963220|AOD;CHV;COSTAR;CSP;CST;DXP;LCH;MEDLINEPLUS;MSH;MTH;MTHICD9;NCI;NDFRT;OMIM;SNOMEDCT|1|0.2299|1  
PH|pulmonary hypoplasia|C0265783|||C0265783|CHV;OMIM;SNOMEDCT|1|0.0121|  
PH|pulp horn|C0447400|||||1  
PH|punctate hemorrhage|||||1  
PICC|Long line;PIC line;pic line;PICC line;picc line;Peripherally inserted central catheter (physical object);picc|C0179740|||C0179740|CHV;MTH;SNOMEDCT|||  
PICC|Peripherally inserted central catheter;peripherally inserted central catheter||1|1|C0179740|SNOMEDCT|1|1|1  
PICC|peripherally inserted central catheter (PICC)|||C0179740|CHV|||  
PIC|PIC|C0014878;C0522667;C0730321|||C0730321|SNOMEDCT|||  
PIC|Paediatric intensive care;pediatric intensive care|C1627360|||C1627360|SNOMEDCT|1|0.0389|  
PIC|Personality Inventory for Children|||||1|0.0973|1  
PIC|Punctate inner choroiditis;punctate inner choroiditis;Punctate inner choroidopathy;punctate inner choroidopathy|C0730321|||C0730321|SNOMEDCT|||1  
PIC|Punctate inner choroidopathy (disorder)|||C0730321|SNOMEDCT|||  
PIC|complexes|C1704241|||||1|0.0506|  
PIC|intracranial pressure|C0021880|||||1|0.0272|  
PIC|islet cells|C0022131|||||1|0.0195|  
PIC|particle-in-cell|||||1|0.0428|  
PIC|penicillin-inhibitor combinations|||||1  
PIC|peripherally inserted catheter||1|1.000||||1  
PIC|personal injury collision|||||1  
PIC|phosphate carrier|||||1|0.0506|  
PIC|phosphoinositidase C|C0136864|||||1|0.1323|  
PIC|phospholipase C|C0031669|||||1|0.035|  
PIC|plasmin-inhibitor complex|||||1  
PIC|polymorphism information content|||||1|0.3541|  
PIC|polysaccharide-iron complex|C0357080|||||1  
PIC|posterior intermediate curve|||||1  
PIC|postinflammatory corticoid|||||1  
PIC|postintercourse|||||1  
PIC|preinitiation complex|||||1|0.1518|1  
PIC|preinvasive cancer|||||1  
PID|DISEASE (PID), PELVIC INFLAMMATORY;INFLAMMATORY DISEASE (PID), PELVIC;PELVIC INFLAMMATORY DISEASE, (PID);PID - pelvic inflammatory disease;PID, PELVIC INFLAMMATORY DISEASE;Pelvic inflammatory disease (PID);pelvic inflammatory disease (PID);DISEASE PELVIC INFLAMMATORY;Disease, Inflammatory Pelvic;Disease, Pelvic Inflammatory;Diseases, Inflammatory Pelvic;Diseases, Pelvic Inflammatory;Inflammatory Disease, Pelvic;Inflammatory Diseases, Pelvic;Inflammatory Pelvic Disease;Inflammatory Pelvic Diseases;PELVIC INFLAMMATORY DISEASE;Pelvic Disease, Inflammatory;Pelvic Diseases, Inflammatory;Pelvic Inflammatory Disease;Pelvic Inflammatory Diseases;Pelvic inflammatory disease;Pelvic inflammatory disease NOS;inflammatory pelvic disease;pelvic inflammatory disease;pelvic inflammatory diseases;Female pelvic

inflammation;Female pelvic inflammatory disease;Female pelvic inflammatory disease NOS;Female pelvic inflammatory diseases NOS;INFLAMMATION PELVIC;PELVIC INFLAMMATION;pelvic inflammation;INFLAMMATORY DISEASE OF FEMALE PELVIC ORGANS;Inflammatory diseases of female pelvic organs|C0242172|1|1|C0242172|CCS;CHV;COSTAR;CSP;CST;DXP;ICD9CM;ICPC;MEDLINEPLUS;MSH;MTH;MTHICD9;NCI;NDFRT;SNOMEDCT|1|0.7821|1  
PID|DKFZp686F2281;MTA2 wt Allele|C2985251||C2985251|MTH;NCI|||  
PID|Fem pelv inflam dis NOS|||C0242172|ICD9CM|||  
PID|Female pelvic infection|||C0242172|SNOMEDCT|||  
PID|Female pelvic inflammatory disease (disorder);Female pelvic inflammatory disease NOS (disorder);Female pelvic inflammatory diseases NOS (disorder)|||C0242172|SNOMEDCT|||  
PID|INFLAMM DIS PELVIC;INFLAMM PELVIC DIS;PELVIC DIS INFLAMM;PELVIC INFLAMM DIS|||C0242172|MSH|||  
PID|Inflam. dis.- pelvic|||C0242172|SNOMEDCT|||  
PID|Inflammatory disease of female pelvic organs AND/OR tissues|||C0242172|SNOMEDCT|||  
PID|Inflammatory disease of female pelvic organs AND/OR tissues (disorder)|||C0242172|SNOMEDCT|||  
PID|Inflammatory disease of female pelvic organs AND/OR tissues [Ambiguous]|||C0242172|SNOMEDCT|||  
PID|Inflammatory disease of female pelvic organs and tissues, NOS|||C0242172|SNOMEDCT|||  
PID|METASTASIS-ASSOCIATED 1-LIKE 1|||C1417406|OMIM|||  
PID|METASTASIS-ASSOCIATED PROTEIN 2|||C1417406|OMIM|||  
PID|MTA1-L1;MTA2;MTA2 Gene;MTA2 gene|C1417406||C1417406|HUGO;MTH;NCI;OMIM|||  
PID|MTA1L1|C1417406;C2985251||C1417406;C2985251|NCI;OMIM|||  
PID|Metastasis Associated 1 Family, Member 2 Gene|||C1417406|NCI|||  
PID|Metastasis Associated 1 Family, Member 2 wt Allele|||C2985251|NCI|||  
PID|PID;pid|C0242172;C1417406;C2985251||C0242172;C1417406;C2985251|CHV;CSP;DXP;MEDLINEPLUS;MTHICD9;NCI;OMIM;SNOMEDCT|||  
PID|Pain intensity difference;pain intensity difference|||1|0.0231|1  
PID|Pelvic Infection;Pelvic infection|C0030790;C0242172||C0242172|NCI|||  
PID|Pelvic Inflammatory Disease [Disease/Finding]|||C0242172|NDFRT|||  
PID|Pelvic inflam. disease NOS|||C0242172|SNOMEDCT|||  
PID|Unspecified inflammatory disease of female pelvic organs and tissues|||C0242172|ICD9CM|||  
PID|[X]Inflammatory diseases of female pelvic organs|||C0242172|SNOMEDCT|||  
PID|[X]Inflammatory diseases of female pelvic organs (disorder)|||C0242172|SNOMEDCT|||  
PID|metastasis associated 1 family, member 2|||C1417406|HUGO|||  
PID|phosphotyrosine interaction domain|||1|0.006|  
PID|photoionization detector|||1|0.009|1  
PID|plasma iron disappearance|||1|  
PID|position-indicating device|||1|  
PID|post-inertia dyskinesia|||1|  
PID|post-inoculation day|||1|0.0171|  
PID|postinoculation day|||1|0.1034|  
PID|preimplantation diagnosis|C0086142|||1|0.006|1  
PID|primary immunodeficiencies;primary immunodeficiency|C0398686;C2984310||C0398686;C2984310|CHV;NCI;SNOMEDCT|1|0.011|1  
PID|primary immunodeficiency diseases|||1|0.008|  
PID|prolapsed intervertebral disc|C0242362|||1|  
PID|proportional-integral-derivative|||1|0.0341|1  
PID|protruded intervertebral disc|||1|  
PIH|PIF;pif|||C0033373|CHV;OMIM;SNOMEDCT|||

PIH|PIF preparation;PROLACTIN RELEASE-INHIBITING FACTOR;Prolactin Release Inhibiting Factors;Prolactin Release-Inhibiting Factors;Prolactin Release Inhibiting Hormone;Prolactin Release-Inhibiting Hormone;prolactin-release-inhibiting hormone;Prolactin inhibiting factor;prolactin inhibiting factor;Prolactin inhibiting factor preparation;prolactin IH;prolactin inhibiting hormone;prolactin-inhibiting hormone;prolactin release- inhibiting hormone (PIH);prolactin release-inhibiting factor (PIF)|C0033373||C0033373|AOD;CHV;CSP;MSH;MTH;NDFRT;OMIM;SNOMEDCT|||1  
PIH|PIH;pih|C0033373;C1418570||C0033373;C1418570|AOD;CHV;HUGO|||  
PIH|PIH gene|C1418570||C1418570|HUGO;MTH|||  
PIH|PRIH|||C0033373|MSH|||  
PIH|PROLACTIN RELEASE INHIB HORMONE|||C0033373|MSH|||  
PIH|Prolactin Release Inhibitory Factor;Prolactin Release-Inhibitory Factor|||C0033373|MSH;NDFRT|||  
PIH|Prolactin Release-Inhibiting Factors [Chemical/Ingredient]|||C0033373|NDFRT|||  
PIH|Prolactin inhibiting factor (substance)|||C0033373|SNOMEDCT|||  
PIH|Prolactin inhibiting factor preparation (product)|||C0033373|SNOMEDCT|||  
PIH|Prolactin inhibiting factor preparation (substance)|||C0033373|SNOMEDCT|||  
PIH|postinflammatory hyperpigmentation|C0333616||C0333616|MTH;SNOMEDCT|||  
PIH|postinjection hours|||1|0.0163|  
PIH|postinoculation hour|||1|0.0163|  
PIH|pregnancy-induced hypertension|C0340274|1|1.000|C0340274|CHV;MSH;SNOMEDCT|1|0.8442|1  
PIH|pregnancy-induced hypertension (pre-eclampsia, eclampsia, toxemia of pregnancy included)|||C1418570|HUGO|||  
PIH|preventricular intraventricular hemorrhage|||1|  
PIH|primary intracerebral hemorrhage|||1|  
PIH|pseudointimal hyperplasia|||1|  
PIH|pyridoxal isonicotinoyl hydrazone|C0072702||C0072702|MSH|1|0.1233|  
PIP|GCDFP-15|C1144261;C1418587;C2985149||C1418587|HUGO;OMIM|||  
PIP|GCDFP15;GPIP4|C1418587;C2985149||C1418587|HUGO|||  
PIP|GROSS CYSTIC DISEASE FLUID PROTEIN;PIP Gene;PIP gene|C1418587||C1418587|HUGO;MTH;NCI;OMIM|||  
PIP|MP/MTX/VCR|||C0279391|NCI;PDQ|||  
PIP|Mercaptopurine/Methotrexate/Vincristine;mercaptopurine/methotrexate/vincristine|C0279391||C0279391|MTH;NCI;PDQ|||  
PIP|PIP|C0279391;C1418587||C0279391;C1418587|HUGO;NCI;OMIM;PDQ|||  
PIP|PROLACTIN-INDUCIBLE PROTEIN;prolactin inducible protein;prolactin-inducible protein|C1144261;C1418587||C1144261;C1418587|HUGO;NCI;OMIM|1|0.0285|1  
PIP|Piperacillin;piperacillin|C0031955||C0031955|CHV;LCH;LNC;MSH;MTH;NCI;NDFRT;RXNORM;SNOMEDCT;USPMG;VANDF|1|0.0549|  
PIP|Prolactin-Induced Protein Gene|||C1418587|NCI|||  
PIP|Psychotic Inpatient Profile|||1|  
PIP|carboxy-terminal propeptide of procollagen type I|||1|0.0102|  
PIP|paraffin immunoperoxidase|||1|  
PIP|paralytic infantile paralysis|||1|  
PIP|peak inflation pressure;peak inflation pressures|||1|0.0203|1  
PIP|peak inspiratory pressure|C0232021|1|0.034|C0232021|SNOMEDCT|1|0.3293|1  
PIP|personal injury protection|||1|  
PIP|phosphatidylinositol monophosphate|||1|0.0224|  
PIP|phosphatidylinositol phosphate|C0071655||C0071655|AOD|1|0.061|  
PIP|piperidine|C0031959||C0031959|AOD;CHV;CSP;LCH;MSH;SNOMEDCT|||  
PIP|plasma cell interstitial pneumonitis|||1|  
PIP|positive inspiratory pressure||1|0.002|||1|  
PIP|posterior interphalangeal|||1|  
PIP|postictal psychosis|||1|

PIP|postinflammatory polyposis|||||||1  
PIP|postinfusion phlebitis|||||||1  
PIP|postinspiratory pressure|||||||1  
PIP|pressure inversion point|||||||1  
PIP|prevention of immune precipitation|||||1|0.0142|  
PIP|probable intrauterine pregnancy|||||||1  
PIP|prolactin-induced protein||||C1418587|HUGO|||  
PIP|proline iminopeptidase|C0243766|||C0243766|MSH;MTH;SNOMEDCT|||  
PIP|prostatic inhibin peptide|C1457875|||C1457875|MSH|1|0.0183|  
PIP|proximal interphalangeal||1|0.964||1|0.4004|1  
PIP|proximal interphalangeal joint|C0932508|||||1|0.0407|  
PIP|psychosis, intermittent hyponatremia, polydipsia|||||||1  
PIP|pulmonary immaturity of prematurity|||||||1  
PIP|pulmonary insufficiency of the premature|||||||1  
PKU|Classical Phenylketonuria;Classical Phenylketonurias;Classical phenylketonuria;Phenylketonuria, Classical;Phenylketonurias, Classical;Deficiencies, Phenylalanine Hydroxylase;Deficiency, Phenylalanine Hydroxylase;Hydroxylase Deficiencies, Phenylalanine;Hydroxylase Deficiency, Phenylalanine;PHENYLALANINE HYDROXYLASE DEFICIENCY;Phenylalanine Hydroxylase Deficiencies;Phenylalanine Hydroxylase Deficiency;Phenylalanine hydroxylase deficiency;Deficiency Disease, Phenylalanine Hydroxylase;Phenylalanine Hydroxylase Deficiency Disease;Deficiency Disease, Phenylalanine Hydroxylase, Severe;Phenylalanine Hydroxylase Deficiency Disease, Severe;Disease, Folling;Disease, Folling's;Diseases, Folling;FOLLING DISEASE;Folling Disease;Folling Diseases;Folling's Disease;FOELLING SYNDROME;Folling's syndrome;HYPERPHENYLALANINEMIA TYPE I;Hyperphenylalaninaemia, type I;Hyperphenylalaninemia, type I;Imbecilitus phenylpyruvica;OLIGOPHRENIA PHENYLPYRUVICA;Oligophrenia Phenylpyruvica;Oligophrenia Phenylpyruvicas;Oligophrenia phenylpyruvica;Phenylpyruvica, Oligophrenia;Phenylpyruvicas, Oligophrenia;OLIGOPHRENIA, PHENYLPYRUVIC;Phenylpyruvic Oligophrenia;Phenylpyruvic oligophrenia;phenylpyruvic oligophrenia;PAH - Phenylalanine hydroxylase deficiency;PAH DEFICIENCY;PAH deficiency;PKU1 - Phenylketonuria;Phenylketonuria I;Severe phenylalanine hydroxylase deficiency|C0751434|||C0751434|CSP;DXP;MSH;MTH;OMIM;SNOMEDCT|||  
PKU|Classical phenylketonuria (disorder)|||C0751434|SNOMEDCT|||  
PKU|DEFIC DIS PHENYLALANINE HYDROXYLASE;PHENYLALANINE HYDROXYLASE DEFIC DIS|||C0751434|MSH|||  
PKU|DEFIC DIS PHENYLALANINE HYDROXYLASE SEVERE;PHENYLALANINE HYDROXYLASE DEFIC DIS SEVERE|||C0751434|MSH|||  
PKU|FOLLING DIS|||C0751434|MSH|||  
PKU|FOLLINGS DIS|||C0751434|MSH|||  
PKU|PHENYLKETONURIA;Phenylketonuria;Phenylketonuria, NOS;Phenylketonurias;phenylketonuria;phenylketonurias;PKU - Phenylketonuria;Phenylketonuria - pku;Phenylketonuria [PKU];phenylketonuria (PKU);pku phenylketonuria|C0031485;C0751434;C2720373|1|1|C0031485;C0751434;C2720373|AOD;CH V;CSP;CST;DXP;ICD9CM;LCH;LNC;MEDLINEPLUS;MSH;MTH;MTHICD9;NCI;NDFRT;OMIM;SNOMEDCT|1|0.9616|1  
PKU|PHENYLKETOURLA;phenylketouria;phenylalaninemia|C0031485|||C0031485|CHV;CSP;C ST|||  
PKU|PKU|C0031485;C0751434|||C0031485;C0751434|CHV;CSP;DXP;MEDLINEPLUS;MSH;MTH;MTHICD9;NCI;OMIM;SNOMEDCT|||  
PKU|Phenylalanine hydroxylase deficiency (disorder)|||C0751434|SNOMEDCT|||  
PKU|Phenylketonuria (disorder)|||C0031485|SNOMEDCT|||  
PKU|Phenylketonuria Is|||C0751434|MSH|||  
PKU|Phenylketonurias [Disease/Finding]|||C0031485|NDFRT|||

PKU|phenylketonuric|||||1|0.0384|  
PMD|ANOPHTHALMIA AND PULMONARY HYPOPLASIA;Anophthalmia with pulmonary hypoplasia;MATTHEW-WOOD SYNDROME;Matthew Wood syndrome;Matthew-Wood syndrome;MCOPS9;MICROPHthalmIA, SYNDROMIC 9|C1832661|||C1832661|MSH;MTH;OMIM|||  
PMD|ANOPHTHALMIA, CLINICAL, WITH MILD FACIAL DYSMORPHISM AND VARIABLE MALFORMATIONS OF THE LUNG, HEART, AND DIAPHRAGM|||C1832661|OMIM|||  
PMD|ANOPHTHALMIA/MICROPHthalmIA AND PULMONARY HYPOPLASIA|||C1832661|OMIM|||  
PMD|HLD1;LEUKODYSTROPHY, HYPOMYELINATING, 1;Pelizaeus Merzbacher brain sclerosis|C0205711|||C0205711|CSP;OMIM|||  
PMD|Leukodystrophy, sudanophilic;Sudanophilic leukodystrophy;sudanophilic leukodystrophy|C0007795;C0205711|||C0205711|CHV;MTHICD9;SNOMEDCT|||  
PMD|MMPL;PLP1 wt Allele|C2698697|||C2698697|MTH;NCI|||  
PMD|PELIZAEUS MERZBACHER DIS|||C0205711|MSH|||  
PMD|PELIZAEUS-MERZBACHER DISEASE;Pelizaeus Merzbacher Disease;Pelizaeus Merzbacher disease;Pelizaeus-Merzbacher Disease;Pelizaeus-Merzbacher disease;pelizaeus merzbacher disease;pelizaeus-merzbacher disease|C0205711;C1418654|||C0205711|CHV;CSP;MSH;MTH;MTHICD9;NDFRT;OMIM;SNOMEDCT|1|0.4417|  
PMD|PLP|||C2698697|NCI|||  
PMD|PLP/DM20|||C2698697|NCI|||  
PMD|PMD|C0205711;C1832661;C2698697|||C0205711;C1832661;C2698697|NCI;OMIM|||  
PMD|PULMONARY AGENESIS, MICROPHthalmIA, AND DIAPHRAGMATIC DEFECT;Pulmonary agenesis, Microphthalmia, and Diaphragmatic defect|||C1832661|MSH;OMIM|||  
PMD|Pelizaeus-Merzbacher Disease [Disease/Finding]|||C0205711|NDFRT|||  
PMD|Pelizaeus-Merzbacher disease (disorder)|||C0205711|SNOMEDCT|||  
PMD|Proteolipid Protein 1 (Pelizaeus-Merzbacher Disease, Spastic Paraplegia 2, Uncomplicated) wt Allele|||C2698697|NCI|||  
PMD|SPEAR SYNDROME|||C1832661|OMIM|||  
PMD|SPG2|C1839264;C2698697|||C2698697|NCI|||  
PMD|dorsal premotor|||||1|0.0485|  
PMD|dorsal premotor area|||||1|0.0437|  
PMD|dorsal premotor cortex|||||1|0.1602|  
PMD|papillary muscle dysfunction|C0149957|||||1|  
PMD|pellucid marginal degeneration|||||1|0.0388|  
PMD|perceptual motor development|C0679018|||||1|  
PMD|piecemeal degranulation|||||1|0.0825|1  
PMD|polarization mode dispersion|||||1|0.0631|  
PMD|posterior mandibular depth|||||1|  
PMD|primary medical doctor||1|1.000|||  
PMD|primary myocardial disease|C0033141|||C0033141|MSH|||1  
PMD|private medical doctor|||||1|  
PMD|programmed multiple development|||||1|  
PMD|progressive muscular dystrophy|C0026850|||C0026850|CHV;SNOMEDCT|1|0.1214|1  
PMI|MANNOSEPHOSPHATE ISOMERASE;mannose phosphate isomerase;mannose-6-phosphate isomerase|C0024744;C1417244|||C1417244|HUGO;OMIM|||  
PMI|MPI|C0663932;C1417244|||C1417244|HUGO;OMIM|||  
PMI|MPI gene;PHOSPHOMANNOSE ISOMERASE 1;PMI1|C1417244|||C1417244|HUGO;MTH;OMIM|||  
PMI|PM1|C0456957;C1823304|||C1823304|HUGO|||  
PMI|PMI|C1417244;C1823304|||C1417244;C1823304|HUGO;OMIM|||  
PMI|Pain Management Index|||||1|0.0678|1  
PMI|TMEM11;TMEM11 gene;transmembrane protein 11|C1823304|||C1823304|HUGO;MTH|||  
PMI|past medical illness|||||1|  
PMI|patient medical instruction|||||1|  
PMI|patient medication instruction|||||1|  
PMI|patient medicine instruction|||||1|  
PMI|perioperative myocardial infarct|||||1|

PMI|perioperative myocardial infarction|||||1|0.3107|1  
PMI|petition of mental illness|||||1  
PMI|phosphomannose isomerase|C0024744|||||1|0.2316|1  
PMI|plea of mental incompetence|||||1  
PMI|point of maximal impulse||1|1.000|||||1  
PMI|posterior myocardial infarct|||||1  
PMI|posterior myocardial infarction|C0340319|||C0340319|CHV;NCI|||1  
PMI|postmortem interval|||||1|0.3898|1  
PMI|postmyocardial infarct|||||1  
PMI|postmyocardial infarction|||||1  
PMI|present medical illness|||||1  
PMI|previous medical illness|||||1  
PM|(11beta-21-[4-[4-[bis(2-chloroethyl)amino]phenyl]-1-oxobutoxy]-11,17-dihydroxypregna-1,4-diene-3,20-dione|||C0032949|NCI|||  
PM|11beta,17,21-trihydroxypregna-1,4-diene-3,20-dione 21-[4-[p-[bis(3-chloroethyl)amino]phenyl]butyrate]|||C0032949|NCI|||  
PM|Attomole per Microliter;Femtomole per Milliliter;Femtomole per milliliter;Femtomole per millilitre;Nanomole per Cubic Meter;Picomole per Liter;picomole per liter;Yoctomole per Picoliter;Zeptomole per Nanoliter;picomolar|C0439284|||C0439284|MTH;NCI;SNOMEDCT|||1  
PM|BASIC SALIVARY PROLINE-RICH PROTEIN, BstNI TYPE, 1;CON2;PRB1 gene;PRB1L;PRB1M;PROLINE-RICH PROTEIN, BstNI SUBFAMILY, 1;proline-rich protein BstNI subfamily 1|C1418866|||C1418866|HUGO;MTH;OMIM|||  
PM|Chlorambucil Prednisolone Ester;PREDNIMUSTINE;Prednimustine;prednimustine|C0032949|||C0032949|MSH;MTH;NCI;NDFRT;PDQ;RXNORM|||  
PM|Every afternoon at institution specified times|||C1550750|MTH|||  
PM|Miquelon and Saint Pierre;SAINT PIERRE AND MIQUELON;Saint Pierre and Miquelon|||C0038111|MSH;MTH;NCI|||  
PM|Miquelon and St. Pierre;St. Pierre and Miquelon|||C0038111|MSH|||  
PM|PA|C0031833|||C0030266|NCI|||  
PM|PAN|C0085999|||C0030266|NCI|||  
PM|PANAMA;Panama;panama|C0030266|||C0030266|AOD;CHV;CSP;LCH;MSH;MTH;NCI;SNOMEDCT|||  
PM|PAROTID MIDDLE BAND PROTEIN|C1867051|||C1867051|MTH;OMIM|||  
PM|PM;PMS;Pm;PmS;pM;pm|C0033046;C1418866;C1868117|||C0030266;C0032949;C0038111;C0439284;C1418866;C1550750;C1867051;C2347516|HL7V3.0;HUGO;NCI;OMIM;PDQ;SNOMEDCT|||  
PM|PMF;PmF|C1418866;C1868201|||C1418866|HUGO;OMIM|||  
PM|PRB1|C0599575;C1418866;C1419295;C2984536|||C1418866|HUGO;OMIM|||  
PM|Palatal myoclonus|C0030214|||||1|0.0044|  
PM|Panama (geographic location)|||C0030266|SNOMEDCT|||  
PM|Pasteurella multocida|C0030637|||||1|0.0073|  
PM|Periodontal mechanosensitive|||||1|0.0044|  
PM|Picometer;picometer|C2347516|||C2347516|MTH;NCI|||1  
PM|Picomole/Liter;picomole/liter;picomole/litre|||C0439284|NCI;SNOMEDCT|||  
PM|Plasmodium malariae|C0032153|||||1  
PM|Prednimustine [Chemical/Ingredient]|||C0032949|NDFRT|||  
PM|Pregna-1,4-diene-3,20-dione, 21-(4-(4-(bis(2-chloroethyl)amino)phenyl)-1-oxobutoxy)-11,17-dihydroxy-, (11beta)-|||C0032949|MSH;NDFRT|||  
PM|Psychological Mindedness|||||1|0.0049|  
PM|SB|||C0038111|NCI|||  
PM|SPM|C2986827|||C0038111|NCI|||  
PM|after death|||||1  
PM|afternoon|C0439550|1|0.846|||||1  
PM|amol/mcL|||C0439284|NCI|||  
PM|amol/uL|||C0439284|NCI|||

PM|evening|C0587117||||||1  
PM|fmol/mL||||C0439284|NCI;SNOMEDCT|||  
PM|intrapulmonary metastasis|||||1|0.0029|  
PM|medial pulvinar|||||1|0.0053|  
PM|method|C0025663;C0449851;C0871511|||||1|0.0044|  
PM|monocytes|C0026473;C0200637|||||1|0.0044|  
PM|mouth pressure|||||1|0.015|  
PM|nmol/m3||||C0439284|NCI|||  
PM|pacemaker|C0030163;C1546728|||C0030163;C1546728|CHV;COSTAR;CSP;HL7V2.5;NCI|1|0.0471|1  
PM|pagetoid melanocytosis||||||1  
PM|papillae mammae||||||1  
PM|papillary  
muscle|C0030352;C1281066|||C0030352;C1281066|CHV;CSP;FMA;MSH;NCI;SNOMEDCT;UWDA|1|0.0291|1  
PM|papular mucinosis|C0263390||||||1  
PM|paraspinal mapping||||||1  
PM|partial  
mastectomy|C0024885;C0851238|||C0024885;C0851238|CHV;COSTAR;MSH;NCI;SNOMEDCT|||  
PM|partial meniscectomy||||||1  
PM|partial mole|C0334529|||C0334529|NCI;SNOMEDCT|1|0.0044|  
PM|partially muscular||||||1  
PM|particulate matter|C1720884|||C1720884|MSH|1|0.2028|1  
PM|pathologic myopia|C1417579|||C1417579|HUGO|||  
PM|patients with polymyositis|||||1|0.0199|  
PM|pectinate muscle|C0225854|||C0225854|CHV;FMA|||  
PM|pectoralis  
major|C0224340;C0585574|||C0224340;C0585574|CHV;FMA;NCI;SNOMEDCT;UWDA|1|0.0223|1  
PM|perfect match|||||1|0.0039|  
PM|perinatal morbidity|C0848215||||||1  
PM|perinatal  
mortality|C0031062;C0701826|||C0031062;C0701826|AOD;CHV;ICPC;MSH;SNOMEDCT|1|0.0044|1  
PM|periodontal membrane|C0031093||||||1  
PM|peritoneal macrophage;peritoneal  
macrophages|C0206190|||C0206190|CHV;FMA;MSH;NCI|1|0.0791|1  
PM|peritoneal mesothelioma|C1377610|||C1377610|MTH;NCI|1|0.0024|  
PM|peritrophic matrix|||||1|0.0097|  
PM|permethrin|C0070455;C1446695|||C0070455;C1446695|CHV;MSH;MTH;MTHSPL;NCI;NDFRT;RXNORM;SNOMEDCT;USPMG;VANDF|||  
PM|petit mal|C0014553||||||1  
PM|phosphoramidate mustard|C0070913|||C0070913|MSH;NCI|1|0.018|  
PM|photomultiplier|C0597229||||||1  
PM|physical medicine|C0031813||||||1  
PM|picomole/liter (pmol/l)|||C0439284|CHV|||  
PM|placental malaria|||||1|0.0039|  
PM|plasma|C0032105;C1546740;C1609077|||||1|0.0044|  
PM|plasma  
membrane|C0007603|||C0007603|AOD;CHV;CSP;FMA;GO;MSH;MTH;NCI;SNOMEDCT;UWDA|1|0.262|1  
PM|platelet membrane||||||1  
PM|platelet microsome||||||1  
PM|pleural mesothelioma|C0812413;C1377913|||||1|0.0034|  
PM|pmol/L||||C0439284|NCI;SNOMEDCT|||  
PM|pmol/L (qualifier value)|||C0439284|SNOMEDCT|||  
PM|pneumomediastinum|C0025062||||||1  
PM|poliomyelitis|C0032371||||||1

PM|polymorphic|C1882417|||||1  
PM|polymorphism|C0032529;C1882417|||C0032529;C1882417|CHV;MSH;MTH;NCI|||  
PM|polymorphonuclear|||||1  
PM|polymyositis|C0085655|||C0085655|AIR;AOD;CHV;COSTAR;CSP;CST;DXP;ICD9CM;MEDLIN  
EPLUS;MSH;MTH;NCI;NDFRT;OMIM;SNOMEDCT|||1  
PM|pons-medulla|||||1|0.0053|  
PM|poor metabolisers;poor metabolizer;poor metabolizers|||||1|0.0907|1  
PM|porokeratosis of Mibelli|C0949506|||||1  
PM|post meridiem|C1509133|||||1  
PM|post mortem;post-  
mortem;postmortem|C0004398;C0580205;C0848632|||C0848632|CHV|1|0.0223|1  
PM|posterior mitral|||||1  
PM|postmenopausal|C0232970|||C0232970|CHV;NCI;PDQ|1|0.0082|1  
PM|prediction model|||||1|0.0034|  
PM|premamillary nucleus|||||1  
PM|premenopausal|C0279752|||C0279752|CHV;NCI;PDQ|||  
PM|premolar|C1704302|||||1  
PM|premotor|||||1|0.0087|  
PM|premotor area|C0458359|||C0458359|SNOMEDCT|1|0.0029|  
PM|premotor cortex|C0228202|||C0228202|CHV;FMA;SNOMEDCT|1|0.0126|  
PM|presents mainly|||||1  
PM|presystolic murmur|C0232265|||||1  
PM|pretibial myxedema|C0033103|||||1  
PM|preventive medicine|C0033110;C1555852|||||1  
PM|primary motivation|||||1  
PM|promethazine|C0033405|||||1|0.0044|  
PM|promethium|C0033406|||||1  
PM|prophylactic mastectomy|C2191320|||C2191320|NCI;SNOMEDCT|1|0.0082|  
PM|prospective memory|C0589154|||C0589154|CHV;MSH;SNOMEDCT|1|0.0087|  
PM|prostatic massage|C0194852|||||1  
PM|protein methylesterase|C0072376|||||1  
PM|psammomatous meningioma|C0334607|||||1  
PM|psoas  
major|C0224419;C1305045|||C0224419;C1305045|CHV;FMA;NCI;SNOMEDCT;UWDA|1|0.0092|  
PM|pterygoid muscle|C0034001;C1280264|||||1  
PM|puberal macromastia|||||1  
PM|pulmonary macrophage;pulmonary macrophages|C0085236|||C0085236|MSH|1|0.0121|1  
PM|pulmonary metastases;pulmonary  
metastasis|C0153676|||C0153676|CHV;SNOMEDCT|1|0.0068|  
PM|pulpomesial|||||1  
PM|puromycin|C0034145|||C0034145|CSP;LCH;MSH;NCI;NDFRT|1|0.0058|  
PM|purple membrane|C0034149|||C0034149|MSH|||  
PM|pyogenic meningitis|C0302869|||||1|0.0024|  
PM|pyridoxamine|C0034268|||C0034268|AOD;CSP;MSH;NDFRT;SNOMEDCT|1|0.0184|  
PM|ymol/pL|||||C0439284|NCI|||  
PM|zmol/nL|||||C0439284|NCI|||  
PND|ANF|||||C1417807|OMIM|||  
PND|ANP|||||C1417807|OMIM|||  
PND|ATRIAL NATRIURETIC FACTOR|C0027481;C1417807|||C1417807|OMIM|||  
PND|ATRIAL NATRIURETIC POLYPEPTIDES;ATRIONATRIURETIC FACTOR;CARDIONATRIN;NPPA  
gene|C1417807|||C1417807|HUGO;MTH;OMIM|||  
PND|ATRIOPEPTIN|C0027481;C0201900|||C1417807|OMIM|||  
PND|DYSPNEA, NOCTURNAL PAROXYSMAL;Dyspnea Paroxysmal Nocturnal;Dyspnea,  
Paroxysmal Nocturnal;PAROXYSMAL NOCTURNAL DYSPNEA;Paroxysmal nocturnal  
dyspnea;Paroxysmal nocturnal dyspnoea;dyspnea nocturnal paroxysmal;dyspnea  
paroxysmal nocturnal;dyspnoea paroxysmal nocturnal;paroxysmal nocturnal  
dyspnea;paroxysmal nocturnal

dyspnoea|C0013405;C1956415|1|0.998|C0013405;C1956415|CHV;COSTAR;DXP;MSH;MTH;NCI;QMR;SNOMEDCT|||1  
PND|Dyspnea, Paroxysmal;Dyspneas, Paroxysmal;Paroxysmal Dyspnea;Paroxysmal Dyspneas;Paroxysmal dyspnea;Paroxysmal dyspnoea;dyspnea paroxysmal;paroxysmal dyspnea;PND - Paroxysmal nocturnal dyspnea;PND - Paroxysmal nocturnal dyspnoea;paroxysmal nocturnal dyspnea  
pnd|C0013405|||C0013405;C1956415|CHV;MSH;MTH;NDFRT;SNOMEDCT|||  
PND|Dyspnea, Paroxysmal [Disease/Finding]|||C0013405|NDFRT|||  
PND|NATRIURETIC PEPTIDE PRECURSOR A|||C1417807|OMIM|||  
PND|NPPA|C0068273;C1417807|||C1417807|HUGO;OMIM|||  
PND|PND;pnd;pnds|C0013405;C1417807;C1956415|||C0013405;C1417807;C1956415|CHV;DXP;OMIM|||  
PND|PRONATRIODILATIN|C0052649;C1417807|||C1417807|OMIM|||  
PND|Paroxysmal dyspnea (finding)|||C0013405|SNOMEDCT|||  
PND|Paroxysmal nocturnal dyspnea (finding);Paroxysmal nocturnal dyspnoea (finding)|||C1956415|SNOMEDCT|||  
PND|Postnatal depression;postnatal depression|C0221074|||C0221074|CHV;CSP;MSH;NDFRT;SNOMEDCT|1|0.0346|1  
PND|cardiac asthma|C0013405;C1956414|||C0013405|CHV|||  
PND|natriuretic peptide A|||C1417807|HUGO|||  
PND|nipple discharge|C0149741|||1|0.0062|  
PND|partial neck dissection|||1|  
PND|pelvic node dissection|||1|  
PND|phrenic nerve discharge|||1|0.0087|  
PND|postnasal drainage|||1|0.002|||1|  
PND|postnasal drip|C0032781|||C0032781|CHV;COSTAR;CST;ICD9CM;NCI;SNOMEDCT|||  
PND|postnatal day|||1|0.8121|  
PND|postneonatal death|C1272076|||1|  
PND|pregnancy, not delivered|C0549206|||1|  
PND|prenatal diagnosis|C0033053|||1|0.068|  
PND|principal neutralizing determinant|||1|0.0457|  
PND|principal neutralizing domain|||1|0.0247|  
PND|purulent nasal drainage|||1|  
PND|pyronaridine|C0072768|||C0072768|MSH;NCI|||  
PNT|PNT|C1518963;C2347617|||C1518963|NCI|||  
PNT|Percutaneous Neuromodulation Therapy|C1518963|||C1518963|NCI|||  
PNT|paroxysmal nodal tachycardia|C0546960|||1|  
PNT|partial nodular transformation|||1|  
PNT|percutaneous nephrostomy tube|C1979960|1|1.000|||1|  
PNT|percutaneous neuromodulatory therapy|||1|  
PNT|pneumotachograph|C0182334|||1|1|  
PO|Activity intolerance risk;At risk for activity intolerance;Potential activity intolerance|C0150009|||C0150009|LNC;MTH;SNOMEDCT|||  
PO|At risk for activity intolerance (finding)|||C0150009|SNOMEDCT|||  
PO|At risk for cognitive impairment;Potential cognitive impairment;Potential for cognitive impairment|C0231393|||C0231393|MTH;SNOMEDCT|||  
PO|At risk for cognitive impairment (finding)|||C0231393|SNOMEDCT|||  
PO|At risk for deficient fluid volume;Fluid volume deficit risk;Potential fluid volume deficit|C0150032|||C0150032|LNC;MTH;SNOMEDCT|||  
PO|At risk for deficient fluid volume (finding)|||C0150032|SNOMEDCT|||  
PO|At risk for deficient parenting;At risk for impaired parenting;Potential alteration in parenting|C0231416|||C0231416|MTH;SNOMEDCT|||  
PO|At risk for deficient parenting (finding)|||C0231416|SNOMEDCT|||  
PO|At risk for imbalanced body temperature;Potential alteration in body temperature;Risk for altered body temperature|C0231359|||C0231359|MTH;SNOMEDCT|||  
PO|At risk for imbalanced body temperature (finding)|||C0231359|SNOMEDCT|||

PO|At risk for impaired skin integrity;At risk for skin ulceration;At risk to skin ulceration;Potential for skin breakdown;Potential skin breakdown;Potential impairment of skin integrity;Skin integrity impairment risk;Vulnerable to skin tissue breakdown|C0231357|||C0231357|LNC;MTH;SNOMEDCT|||

PO|At risk for impaired skin integrity (finding)|||C0231357|SNOMEDCT|||

PO|At risk for infection;At risk of infection;Infection risk;infection risk;infection risks;infections risk;risk for infection;Potential for infection|C0582147|||C0582147|CHV;LNC;MTH;SNOMEDCT|||

PO|At risk for infection (finding);At risk of infection (finding)|||C0582147|SNOMEDCT|||

PO|At risk for injury;At risk of injury;at risk of injury;At risk for trauma;Injury risk;injuries risk;injury risk;injury risks;risk injury;risk injury for;Trauma risk|C0582456|||C0582456|CHV;LNC;MTH;SNOMEDCT|||

PO|At risk for injury (finding);At risk of injury (finding)|||C0582456|SNOMEDCT|||

PO|At risk for joint contractures;Potential for joint contractures;Potential joint contractures|C0231379|||C0231379|MTH;SNOMEDCT|||

PO|At risk for joint contractures (finding)|||C0231379|SNOMEDCT|||

PO|At risk for poisoning injury;Poisoning risk;Potential for poisoning|C0150061|||C0150061|LNC;MTH;SNOMEDCT|||

PO|At risk for poisoning injury (finding)|||C0150061|SNOMEDCT|||

PO|At risk for suffocation;Potential for suffocation;Suffocation risk|C0150082|||C0150082|LNC;MTH;SNOMEDCT|||

PO|At risk for suffocation (finding)|||C0150082|SNOMEDCT|||

PO|At risk for suffocation [dup] (finding)|||C0150082|SNOMEDCT|||

PO|At risk for violence;Potential for violence;Violence risk|C0231418|||C0231418|LNC;MTH;SNOMEDCT|||

PO|At risk for violence (finding)|||C0231418|SNOMEDCT|||

PO|By mouth;by mouth;Oral Route of Administration;Oral Route of Drug administration;Oral use;oral use;use oral;PO - Per os;Per Os;Per os;per os;Per oral route;Peroral route;per oral|C1527415|1|0.998|C1527415|CHV;MTH;NCI;SNOMEDCT|1|0.0576|1

PO|Maximum isometric tetanic force|||1|0.0064|

PO|ORAL;Oral;oral;Orally;orally;PO;Po|C0442027|||C0032344;C0032729;C0150009;C0150032;C0150061;C0150082;C0231357;C0231359;C0231379;C0231393;C0231416;C0231418;C0442027;C0582147;C0582456;C1446409;C1527415|AOD;CHV;HL7V2.5;LNC;MSH;MTH;NCI;SNOMEDCT|1|0.1295|

PO|Oral (qualifier value)|||C0442027|SNOMEDCT|||

PO|Oral route;OralRoute;oral route|C0205531;C1527415|||C1527415|CHV;HL7V3.0;SNOMEDCT|||

PO|Oral route (qualifier value)|||C1527415|SNOMEDCT|||

PO|PO - Oral|||C0442027|SNOMEDCT|||

PO|POIS|||C0032344|MSH|||

PO|PORTUGAL;Portugal;portugal|C0032729|||C0032729|AOD;CHV;LCH;MSH;MTH;NCI;SNOMEDCT|||

PO|PRT|C0020687;C0032729;C1152182|||C0032729|NCI|||

PO|PT|||C0032729|NCI|||

PO|Perceptual Organization;perceptual organization|||1|0.0056|1

PO|Personality Organization|||1|0.0048|

PO|Phenol oxidase;phenoxidase|C0041484|||C0041484|CHV;MSH;NDFRT|1|0.0624|

PO|Plasmodium ovale|C0320744|||1|

PO|Poisoning aspects|C0032344|||C0032344|MTH|||

PO|Portugal (geographic location)|||C0032729|SNOMEDCT|||

PO|Positive;Positive for;positive;positive for|C0439178;C1446409;C1514241;C2825490|||C1446409|CHV;MTH;NCI;SNOMEDCT|||

PO|Positive (qualifier value)|||C1446409|SNOMEDCT|||

PO|Posterior group of thalamic nuclei|||1|0.008|

PO|Potential for injury (trauma)|||C0582456|SNOMEDCT|||  
PO|Pulse oximetry;pulse  
oximetry|C0034108||C0034108|CHV;LNC;MSH;NCI;SNOMEDCT|1|0.0088|1  
PO|Ruled  
in;rule;ruled;ruling|C0805874;C0870077;C1446409||C1446409|CHV;SNOMEDCT|||  
PO|Skin at risk of breakdown|||C0231357|SNOMEDCT|||  
PO|Skin at risk of breakdown (finding)|||C0231357|SNOMEDCT|||  
PO|Skin integrity at risk|||C0231357|SNOMEDCT|||  
PO|administered|C1521801|||1|0.0072|  
PO|day of birth|||1|0.0096|  
PO|granulosa cells of preovulatory|||1|0.0032|  
PO|maximum isometric force|||1|0.0072|  
PO|maximum isometric tension|||1|0.008|  
PO|open probability;probability of opening|||1|0.2206|  
PO|opening pressure|||1|  
PO|oral administration|C0001563|||1|0.0128|  
PO|oral gavage|||1|0.0112|  
PO|palm oil|C0069962|||1|0.02|  
PO|paraoxon|C0030480||C0030480|LNC;MSH;NDFRT;SNOMEDCT|1|0.012|  
PO|parapineal organ|||1|  
PO|parietal operculum|C0228265||C0228265|FMA;MTH;SNOMEDCT|||1  
PO|parieto-occipital;parietooccipital|||1|0.0072|1  
PO|peanut oil|C0052300||C0052300|CHV;MSH;NCI;NDFRT;SNOMEDCT;VANDF|1|0.0088|  
PO|period of onset|C0458004||C0458004|SNOMEDCT|||1  
PO|perioperative|C1518988;C1552246||C1518988;C1552246|HL7V3.0;MTH;NCI|||1  
PO|periosteum|C0031110|||1|  
PO|peroral|||1|0.024|  
PO|perorally|||1|0.012|  
PO|peroxidase|C0027021;C0031179;C1318719||C0027021;C0031179;C1318719|CHV;CSP;LC  
H;LNC;MSH;MTH;NDFRT;SNOMEDCT|1|0.0488|  
PO|phone order|||1|  
PO|phosphodiester|C0599124||C0599124|CSP|1|0.0336|  
PO|physician only|||1|  
PO|poise|C1551084;C2937256|||1|  
PO|poisoning|C0032343;C0032344||C0032344|MSH|||  
PO|polonium|C0032390|||1|  
PO|polyolefin|C0950546||C0950546|MSH;SNOMEDCT|1|0.0072|  
PO|porion|C2346418|||1|  
PO|post box|C1550717;C2698859|1|0.002|||  
PO|posterior|C0205095||C0205095;C0751438|CHV;CST;FMA;HL7V2.5;NCI;SNOMEDCT;UWDA|  
1|0.0184|1  
PO|posterior complex|||1|0.0048|  
PO|posterior nuclear group|||1|0.0096|  
PO|posterior nucleus|||1|0.0064|  
PO|postoperative|C0032790||C0032790|CHV;NCI;SNOMEDCT|1|0.0344|1  
PO|postoperatively|||1|0.0112|1  
PO|power output|C0445194||C0445194|CHV;SNOMEDCT|1|0.0528|  
PO|predominating organism|||1|  
PO|preoptic area|C0033063||C0033063|AOD;CSP;FMA;MSH;SNOMEDCT|1|0.0088|  
PO|pressure|C0033095;C0460139;C1306345|||1|0.0248|  
PO|principal olive|||1|0.0128|  
PO|probability of being open|||1|0.0056|  
PO|probability of channel opening|||1|0.008|  
PO|probability of the channel being open|||1|0.004|  
PO|progesterone|C0033308;C2757070|||1|0.0128|  
PO|prophylactic oophorectomy|C2945703||C2945703|CHV;NCI|||1  
PO|propylene oxide|C0072229||C0072229|MSH;NCI;SNOMEDCT|||

PO|prostate only|1|1|1|1|0.004|  
PO|protein oxidation|C1159301|1|1|C1159301|GO|1|1|0.0096|  
PO|pulse oximeter|C0182109|1|1|1|1|1|  
PO|punctal occlusion|C0395275|1|1|1|1|1|  
PO|rulings|C1446409|1|1|C1446409|CHV|1|1|  
PO|tetanic tension|1|1|1|1|1|0.036|  
PPD|ARTHROPATHY, PROGRESSIVE PSEUDORHEUMATOID, OF CHILDHOOD;Arthropathy, progressive pseudorheumatoid, of childhood;PROGRESSIVE PSEUDORHEUMATOID ARTHROPATHY OF CHILDHOOD;Progressive pseudorheumatoid arthropathy of childhood;PPAC;PROGRESSIVE PSEUDORHEUMATOID DYSPLASIA;Progressive pseudorheumatoid dysplasia;progressive pseudorheumatoid dysplasia;SEDT-PA;SPONDYLOEPIPHYSEAL DYSPLASIA TARDA WITH PROGRESSIVE ARTHROPATHY;Spondyloepiphyseal dysplasia tarda with progressive arthropathy|C0432215|1|1|C0432215|MSH;MTH;OMIM;SNOMEDCT|1|1|1|  
PPD|Argonaute2;eIF2C2|C1414333;C2827477|1|1|C2827477|NCI|1|1|1|  
PPD|Eukaryotic Translation Initiation Factor 2C 2;Eukaryotic Translation Initiation Factor 2C2;PAZ Piwi Domain Protein;Protein Argonaute-2;Protein Slicer;eIF-2C 2;eIF2C 2;hAgo2|C2827477|1|1|C2827477|MTH;NCI|1|1|1|  
PPD|PPD;ppd's;ppds;PPD - Purified protein derivative - S;PPD-S;Purified Protein Derivative;Purified protein derivative;derivative protein purified;purified protein derivative;Purified Protein Derivative of Tuberculin;TUBERCULIN, PURIFIED PROTEIN DERIVATIVE;Tuberculin purified protein derivative;tuberculin purified protein derivative;Purified protein derivative - S;Tuberculin  
PPD|C0034131|1|1|C0034131;C0432215;C1421473;C1552732;C2827477|CHV;HUGO;MSH;MTH;MTHSPL;NCI;NDFRT;OMIM;RXNORM;SNOMEDCT;VANDF|1|1|0.6694|1|  
PPD|Paired-pulse depression|1|1|1|1|1|0.0424|  
PPD|Parametric Probability Distribution|C1552662;C1552732|1|1|C1552732|HL7V3.0;NCI|1|1|1|  
PPD|Parametric Probability Distribution - DataType|C1552732|1|1|C1552732|MTH|1|1|1|  
PPD|Progressive pseudorheumatoid dysplasia (disorder)|1|1|C0432215|SNOMEDCT|1|1|1|  
PPD|Purified Protein Derivative of Tuberculin [Chemical/Ingredient]|1|1|C0034131|NDFRT|1|1|1|  
PPD|Purified protein derivative (product)|1|1|C0034131|SNOMEDCT|1|1|1|  
PPD|Purified protein derivative (substance)|1|1|C0034131|SNOMEDCT|1|1|1|  
PPD|Purified protein derivative - S (substance)|1|1|C0034131|SNOMEDCT|1|1|1|  
PPD|RETINAL INNER NUCLEAR LAYER HOMEBOX;RINX;VSX1;VSX1 gene;visual system homeobox 1|C1421473|1|1|C1421473|HUGO;MTH;OMIM|1|1|1|  
PPD|Tuberculin|C0034131;C0041289;C1532464|1|1|C0034131|SNOMEDCT|1|1|1|  
PPD|Tuberculin purified protein derivative (product)|1|1|C0034131|SNOMEDCT|1|1|1|  
PPD|Tuberculin purified protein derivative (substance)|1|1|C0034131|SNOMEDCT|1|1|1|  
PPD|VISUAL SYSTEM HOMEBOX GENE 1, ZEBRAFISH, HOMOLOG OF|1|1|C1421473|OMIM|1|1|1|  
PPD|p-phenylenediamine;para-phenylenediamine;paraphenylenediamine|C0048678|1|1|C0048678|CHV;MSH;NDFRT;SNOMEDCT;VANDF|1|1|0.064|1|  
PPD|packs per day|1|1|1|1|1|1|1|  
PPD|percussion and postural drainage|1|1|1|1|1|1|1|  
PPD|permanent partial disability|1|1|1|1|1|1|1|  
PPD|photodynamic diagnosis|1|1|1|1|1|1|1|  
PPD|pinch-point density|1|1|1|1|1|1|1|  
PPD|pocket probing depth;probing pocket depth|1|1|1|1|1|1|0.0976|1|  
PPD|posterior polymorphous dystrophy|1|1|1|1|1|1|0.006|1|  
PPD|postpartum day|1|1|1|1|1|1|0.0045|1|  
PPD|postpartum depression|C0221074|1|1|C0221074|CHV;CSP;MEDLINEPLUS;MSH;NCI;NDFRT;SNOMEDCT|1|1|0.0343|1|  
PPD|postprandial|C0376674|1|1|1|1|1|1|1|  
PPD|preaxial polydactyly|C0345354|1|1|C0345354|OMIM;SNOMEDCT|1|1|1|

PPD|prepared|1  
PPD|preprodynorphin|C0071827||C0071827|MSH;SNOMEDCT|1|0.0335|  
PPD|primary peritoneal drainage|1  
PPD|primary physical dependence|1  
PPD|progressive perceptive deafness|1  
PPD|progressive pulmonary dystrophy|1  
PPD|proximal pars distalis|1|0.029|  
PPD|purified protein derivative from tuberculin|1|0.0022|  
PPD|purified protein derivative of Mycobacterium tuberculosis|1|0.0104|  
PPD|pylorus-sparing pancreaticoduodenectomy|C1293563|1  
PPD|tuberculin skin test|C0041290||1|0.0067|  
PPI|Inhibitors; Proton Pump; Proton Pump Inhibitor; Proton Pump Inhibitors; Proton pump inhibitor; Proton pump inhibitors; inhibitor proton pump; inhibitors proton pump; proton pump inhibitor; proton pump inhibitors|C0358591;C1384478|1|0.998|C0358591|CHV;LNC;MSH;MTH;NCI;NDFRT;SNOMEDCT;USPMG|1|0.289|1  
PPI|PPI|C0358591;C0871125||C0358591;C0871125|GO;NCI||  
PPI|Patient Package Insert; patient package insert|1|0.0073|1  
PPI|Plan-Position-Indication|1  
PPI|Proton Pump Inhibitor [EPC]|C0358591||C0358591|NDFRT||  
PPI|Proton pump inhibitor (product)|||C0358591|SNOMEDCT||  
PPI|Proton pump inhibitor (substance)|||C0358591|SNOMEDCT||  
PPI|Psychopathic Personality Inventory|1|0.0073|1  
PPI|inorganic pyrophosphate|1|0.1057|1  
PPI|paired-pulse index|1|0.0082|  
PPI|partial permanent impairment|1  
PPI|peptidyl prolyl cis-trans isomerase|C0136073;C1414624||1|0.0046|  
PPI|permanent pacemaker insertion|C2924511;C2926072|1  
PPI|phosphoinositide|C0031621||1|0.0237|  
PPI|polyphosphoinositide|C0071655||C0071655|AOD;MSH;NDFRT|1|0.0629|  
PPI|polypropyleneimine|C1100475||C1100475|MSH||  
PPI|post pacing interval|1  
PPI|postpartum interval|1|0.0055|  
PPI|pre-pulse inhibition; prepulse inhibition; prepulse inhibition activity|C0871125||C0871125|GO;MTH|1|0.4111|1  
PPI|preceding preparatory interval|1  
PPI|preproinsulin|C0071928||C0071928|MSH|1|0.01|  
PPI|prepulse inhibition of acoustic startle|1|0.01|  
PPI|present pain intensity|1|0.0301|1  
PPI|protein-protein interaction|C0872079||C0872079|NCI|1|0.0064|  
PPI|psychophysiological insomnia|C0751250||C0751250|MSH;MTHICD9||  
PPI|pulse polio immunization|1|0.0064|  
PPI|purified pork insulin|1|0.0119|  
PPT|CLN1|C1418854;C1850451||C1418854|HUGO||  
PPT|INCL|C0268281;C1418854||C1418854|HUGO||  
PPT|PALMITOYL-PROTEIN THIOESTERASE; palmitoyl-protein thioesterase|C0380804;C1418854||C0380804;C1418854|MSH;OMIM;SNOMEDCT|1|0.0866|  
PPT|PALMITOYL-PROTEIN THIOESTERASE 1; palmitoyl-protein thioesterase 1|C0917464;C1418854||C1418854|HUGO;OMIM||  
PPT|PAP|C0523444||C2266415|GO||  
PPT|PPT;ppt|C1153596;C1418854;C1551050;C2266415||C1153596;C1418854;C1551050;C2266415|GO;NCI;OMIM||  
PPT|PPT1;PPT1 gene|C1418854||C1418854|HUGO;LNC;MTH;OMIM||  
PPT|Part per Thousand; parts per thousand;ppth|C1551050||C1551050|HL7V3.0;MTH;NCI||  
PPT|Physical Performance Test; physical performance test|C0679543||C0679543|AOD;CHV|1|0.0628|1

PPT|Platelet production time|||||1|0.013|  
PPT|ceroid-lipofuscinosis, neuronal 1,  
infantile|C1418854;C2931673|||C1418854|HUGO|||  
PPT|parietal pleural tissue|||||1|  
PPT|part per trillion;parts per trillion|C1551051|||||1|0.0844|1  
PPT|partial prothrombin time|C0853653|1|1.000|C0853653|CHV|||1  
PPT|paw pressure threshold|||||1|0.013|  
PPT|peak-to-peak threshold|||||1|  
PPT|pedunculo pontine tegmental|||||1|0.0325|  
PPT|pedunculo pontine tegmental nucleus|C0262306|||C0262306|FMA;MSH|1|0.0671|  
PPT|pedunculo pontine tegmentum|C0872242|||C0872242|CSP|1|0.0281|  
PPT|person, place, and time|||||1|  
PPT|phosphinothricin|C0070815|||C0070815|MSH|1|0.039|  
PPT|phosphoenolpyruvate transmembrane transporter activity|||C1153596|GO|||  
PPT|phosphoenolpyruvate/phosphate translocator|||C1153596|GO|||  
PPT|phosphoenolpyruvate:phosphate antiporter  
activity|C1153596|||C1153596|GO;MTH|||  
PPT|pineal parenchymal tumor|C0031941|||C0031941|MSH;NCI|||  
PPT|plant protease test|||||1|  
PPT|pneumonia prevention therapy|||||1|  
PPT|polyp prevention trial|C1514210|||C1514210|NCI|||  
PPT|polyphosphate:AMP phosphotransferase activity|C2266415|||C2266415|GO;MTH|||  
PPT|polypurine tract|||||1|0.1494|  
PPT|post-partum thyroiditis;postpartum  
thyroiditis|C0271815|||C0271815|CHV;MSH;NDFRT;SNOMEDCT|1|0.0887|1  
PPT|posterior pelvic tilt|||||1|  
PPT|potassium phosphotungstate|||||1|  
PPT|precipitate;precipitated|C1882443|||||1|  
PPT|precipitation|C0032931;C0032932;C1642401;C2584299|||||1|  
PPT|preprotachykinin|C0071942|||C0071942|MSH|1|0.1905|  
PPT|pressure pain threshold|||||1|0.1277|1  
PPT|professional protective technology|||||1|  
PPT|propyl pyrazole triol|C1172032;C1527986|||C1172032|MSH|1|0.0173|  
PPT|pulmonary physical therapy|||||1|  
PPT|pulmonary platelet trapping|||||1|  
PRN|As Necessary;PRN (schedule frequency)|C1879745|||C1879745|MTH;NCI|||  
PRN|As Needed;as needed;as-  
needed|C1883728|1|1|C1879745;C1883728|MTH;NCI|1|0.1262|1  
PRN|As Required;As required;as required;given as  
needed|C0558288|||C0558288|CHV;HL7V2.5;MTH;NCI;SNOMEDCT|||  
PRN|As Situation Arises|||C1883728|NCI|||  
PRN|As required (qualifier value)|||C0558288|SNOMEDCT|||  
PRN|FLJ21988;HPRN;IOP1;IRON-ONLY HYDROGENASE-LIKE PROTEIN 1;iron-only  
hydrogenase-like protein 1;NARFL;NARFL gene|C1422467|||C1422467|HUGO;MTH;OMIM|||  
PRN|NUCLEAR PRELAMIN A RECOGNITION FACTOR-LIKE;nuclear prelamin A recognition  
factor-like|||C1422467|HUGO;OMIM|||  
PRN|PRN;Prn;prn|||C0558288;C1422467;C1879745;C1883728|CHV;HUGO;LNC;NCI;SNOMEDCT  
|||  
PRN|Pro Re Nata;pro re nata|C1879745;C1883728|||C1879745;C1883728|NCI|1|0.1456|  
PRN|When required;when required|||C0558288|CHV;SNOMEDCT|||  
PRN|paramedian reticular nucleus|C0682738|||||1|0.2816|  
PRN|plaque reduction neutralization|||||1|0.2621|  
PRN|polyradiculoneuropathy|C0032587|||C0032587|CHV;MSH;NDFRT;SNOMEDCT|||  
PRN|post-rotatory nystagmus;postrotatory  
nystagmus|C0524671|||C0524671|MSH|1|0.1748|  
PRN|practice and research network|||||1|0.0097|  
PRN|prn - When required|||C0558288|SNOMEDCT|||

PR|(drug) PR||1|0.004|||||  
PR|ACIDIC SALIVARY PROLINE-RICH PROTEIN, HaeIII TYPE, 2;acidic salivary proline-rich protein, HaeIII type, 2;PAROTID PROLINE-RICH PROTEIN;parotid proline-rich protein;PRH2;PRH2 gene;PROLINE-RICH PROTEIN, HaeIII SUBFAMILY, 2;proline-rich protein HaeIII subfamily 2|C1418893||C1418893|HUGO;MTH;OMIM|||  
PR|Diagnosis.primary;The primary diagnosis;primary diagnosis|C0332137;C0801658||C0332137|CHV;HL7V2.5;LNC|||  
PR|In partial remission;Partial Remission;partial remission;Partial Response;partial response|C1521726||C1521726|AOD;MTH;NCI;SNOMEDCT|1|0.6902|1  
PR|In partial remission (qualifier value)|||C1521726|SNOMEDCT|||  
PR|Incomplete remission -RETIRED-|||C1521726|SNOMEDCT|||  
PR|Main diagnosis|C0332137||C0332137|SNOMEDCT|||  
PR|NR3C3|C1366500;C1705324||C1366500;C1705324|HUGO;NCI|||  
PR|PGR;PgR|||C0034833;C1366500;C1705324|HUGO;NCI;OMIM;PDQ|||  
PR|PGR Gene;PGR gene;Progesterone Receptor Gene|C1366500||C1366500|HUGO;MTH;NCI|||  
PR|PGR wt Allele;Progesterone Receptor wt Allele|C1705324||C1705324|MTH;NCI|||  
PR|PR;Pr;pr|C0279759;C0279766;C1418864||C0034044;C0034833;C0332137;C1366500;C1418893;C1521726;C1540007;C1705324|CHV;HUGO;NCI;OMIM;SNOMEDCT|||  
PR|PR - Progesterone receptor;progesterone receptor (PR);PROGESTERONE RECEPTOR;Progesterone Receptor;Progesterone Receptors;Progesterone receptor;Receptor, Progesterone;Receptors, Progesterone;progesterone receptor;progesterone receptors|C0034833;C1366500|1|0.176|C0034833;C1366500|CHV;CSP;HUGO;LNC;MSH;MTH;NCI;NDFRT;OMIM;SNOMEDCT|||1  
PR|PR1;TMEM37;TMEM37 gene;transmembrane protein 37|C1540007||C1540007|HUGO;MTH|||  
PR|PRI;PUERTO RICO;Puerto Rico;puerto rico;puerto ricos|C0034044||C0034044|AOD;CHV;CSP;LCH;MSH;MTH;NCI;SNOMEDCT|1|0.0045|  
PR|PROGESTERONE RECEPT;RECEPT PROGESTERONE|||C0034833|MSH|||  
PR|PROGESTIN RECEPT;RECEPT PROGESTIN|||C0034833|MSH|||  
PR|Paeoniae radix|C0949958|||1|0.0029|  
PR|Panama red|||1  
PR|Photoreactivation;photoreactivation|||1|0.0064|1  
PR|Plain radiography|C1306645|||1|0.0029|  
PR|Preyer reflex|||1  
PR|Principal Diagnosis;Principal diagnosis;principal diagnosis|C0332137;C2598194||C0332137|CHV;LNC;MTH;SNOMEDCT|||  
PR|Principal diagnosis (contextual qualifier)|||C0332137|SNOMEDCT|||  
PR|Principal diagnosis (contextual qualifier) (qualifier value)|||C0332137|SNOMEDCT|||  
PR|Progesterone receptor (substance)|||C0034833|SNOMEDCT|||  
PR|Progesterone receptor site;Progesterone Receptors;Receptors, Progesterone|C0034833||C0034833|MSH;NDFRT;SNOMEDCT|||  
PR|Projection reconstruction|||1|0.0106|  
PR|Puerto Rico (geographic location)|||C0034044|SNOMEDCT|||  
PR|RQ|||C0034044|NCI|||  
PR|Receptors, Progesterone [Chemical/Ingredient]|||C0034833|NDFRT|||  
PR|Release|C0030685;C0391871;C0439180;C0680255;C1283071;C1963578|||1|0.0051|  
PR|expression of pathogenesis-related|||1|0.0071|  
PR|form of phytochrome|||1|0.0019|  
PR|onset of ventricular depolarization|||1  
PR|pack removal|||1  
PR|pain relief|C0451615|||1|0.0029|  
PR|palindromic rheumatism|C0085574|||1  
PR|panic reaction|C0030318|||1  
PR|panoramic radiography|C0034579|||1|0.0023|

PR|parallax refraction|||||||1  
PR|pars recta||||||1|0.0029|1  
PR|partial regression||||||1|0.0029|  
PR|partial reinforcement|||||||1  
PR|partial responders||||||1|0.0084|  
PR|particulate respirator|||||||1  
PR|passive recovery||||||1|0.0026|  
PR|patient relations|||||||1  
PR|pattern recognition|C1518918||||||1|0.0029|  
PR|pattern reversal|C0439717||||||1|0.0035|  
PR|peer review|C0030768|||||||1  
PR|pelvic rock|||||||1  
PR|pentoxyresorufin|C0070318|||C0070318|MSH|||  
PR|per rectum|C1527425|1|0.282|||||1  
PR|percentile rank|||||||1  
PR|perennial rhinitis|C0848309|||||||1  
PR|perfusion rate|||||||1  
PR|peripheral resistance|C1258192|||C1258192|CHV;MSH|1|0.0071|1  
PR|perirenal||||||1|0.0029|  
PR|perirhinal cortex||||||1|0.0029|  
PR|phenol red|C0031430|||C0031430|CHV;MSH;NCI;NDFRT|1|0.0055|1  
PR|photoreaction|||||||1  
PR|photoreceptor|C0031760|||C0031760|AOD;CHV;FMA|||  
PR|physical rehabilitation|C0849487|||||||1  
PR|physician reviewer|||||||1  
PR|pityriasis  
rosea|C0032026|||C0032026|CHV;COSTAR;CST;DXP;ICD9CM;ICPC;MSH;MTH;NCI;NDFRT;SNOME  
DCT|1|0.008|1  
PR|placental restriction||||||1|0.0016|  
PR|plaque reduction||||||1|0.0032|  
PR|pneumatic retinopexy|C0395578||||||1|0.0029|  
PR|polymorphic  
reticulosis|C0019623;C2350168|||C0019623;C2350168|CHV;MSH;MTH;SNOMEDCT|1|0.0048|  
PR|polymyalgia rheumatica|C0032533;C0039483|||||||1  
PR|posterior root|C2332346|||||||1  
PR|postural reflex|C0234154|||||||1  
PR|potency ratio|||||||1  
PR|potential relation|||||||1  
PR|pr interval|C0429087;C0488345;C0520877|1|0.504|||||  
PR|praseodymium|C0032904|||||||1  
PR|prealbumin|C0032923||||||1|0.0032|  
PR|prednisolone|C0032950|||C0032950|AOD;CHV;CSP;LNC;MSH;MTH;MTHSPL;NCI;NDFRT;PDQ  
;RXNORM;SNOMEDCT;USPMG;VANDF|1|0.0055|  
PR|preference record|||||||1  
PR|pregnancy|C0032961|||||||1  
PR|pregnancy rate|C0032975|||C0032975|CHV;MSH|1|0.0621|1  
PR|pregnant|C0549206;C0553641;C0600457||||||1|0.0029|  
PR|premature|C0205252|||||||1  
PR|presbyopia|C0033075|||||||1  
PR|pressoreceptor|C0033093|||||||1  
PR|pressure|C0033095;C0460139;C1306345|||||||1  
PR|prevalence ratio||||||1|0.0183|  
PR|prevention|C0199176;C1706420;C2700409|||||||1  
PR|proctology|C0033248|||||||1  
PR|production rate|||||||1  
PR|professional relations|||||||1  
PR|profile|C1979963;C2003903|||||||1

PR|progesterin|C0033306|||C0033306|AOD;CHV;CSP;NCI;NDFRT;PDQ;SNOMEDCT|||  
PR|progressive ratio|||||1|0.0302|  
PR|progressive relaxation|||||1|  
PR|progressive resistive exercise|||||1|  
PR|prolactin|C0033371;C1744644|||||1|  
PR|proliferative retinopathy|C0339467|||C0339467|CHV|1|0.0035|  
PR|proline-rich|||||1|0.0029|  
PR|prolonged remission|||||1|  
PR|prone|C0033422|||||1|  
PR|propranolol|C0033497|||C0033497|AOD;CHV;CSP;LNC;MSH;MTH;NCI;NDFRT;RXNORM;SNOM  
EDCT;USPMG;VANDF|1|0.0129|  
PR|prorenin;prorennin|C0072249;C0072250|||C0072250|MSH;MTH;SNOMEDCT|1|0.0035|  
PR|prosthion|C2339454|||||1|  
PR|protease|C0030946;C1947941|||C0030946;C1947941|CHV;CSP;LNC;NCI;NDFRT;SNOMEDCT  
;VANDF|||1|  
PR|protein|C0033684|||||1|0.0061|1|  
PR|protein restriction|||||1|0.0019|  
PR|proteinase|C0030946;C1622131;C1947941|||C0030946;C1622131;C1947941|CHV;CSP;GO  
;LCH;NCI;SNOMEDCT|||  
PR|pseudorabies|C0033839|||||1|0.0039|  
PR|psychotherapy responder|||||1|  
PR|public relations|C0034034|||||1|  
PR|pulmonary regurgitation;pulmonic  
regurgitation|C0034088|1|0.024|C0034088|CHV;DXP;MSH;NCI;NDFRT;SNOMEDCT|1|0.0161|  
1  
PR|pulmonary  
rehabilitation|C0199529;C1552326;C1552340|||C0199529;C1552326;C1552340|CHV;HL7V3  
.0;SNOMEDCT|1|0.0087|1|  
PR|pulse rate|C0232117;C0391850|1|0.002|||||1|  
PR|pulse repetition|||||1|  
PR|punctum remotum|||||1|  
PR|pyramidal response|||||1|  
PR|reaction|C0443286;C1114821|||||1|0.0039|  
PR|region|C0017446;C0205147|||||1|0.0035|  
PR|release probability|||||1|0.0023|  
PR|retention|C0035280;C0333117;C1753315|||||1|0.0029|  
PR|under a progressive-ratio|||||1|0.0035|  
PR|viral proteinase|||||1|0.0032|  
PSA|AMINOPEPTIDASE, PUROMYCIN-SENSITIVE;aminopeptidase puromycin  
sensitive;puromycin-sensitive  
aminopeptidase|C0139360;C1417779|||C0139360;C1417779|HUGO;MSH;MTH;OMIM|1|0.0024|  
PSA|ANTIGEN, PROSTATE-SPECIFIC;Antigen, Prostate-Specific;PROSTATE-SPECIFIC  
ANTIGEN;Prostate Specific Antigen;Prostate specific Antigen;Prostate specific  
antigen;Prostate-Specific Antigen;prostate specific antigen;prostate-specific  
antigen;PSA - Prostate specific antigen;prostate specific antigen  
(PSA)|C0138741;C0201544;C1366489|1|1|C0138741;C0201544;C1366489|CHV;CSP;LNC;MSH;  
MTH;NCI;NDFRT;OMIM;SNOMEDCT|1|0.8806|1|  
PSA|APS|||||C1366489;C1705954|NCI;OMIM|||  
PSA|Antigens|C0003320|||||1|0.002|  
PSA|Benign Mixed Salivary Gland Neoplasm;Benign Mixed Salivary Gland  
Tumor;Benign Mixed Salivary Neoplasm;Benign Mixed Salivary Tumor;Pleomorphic  
adenoma of salivary gland;SALIVARY GLAND ADENOMA, PLEOMORPHIC;Salivary Gland  
Pleomorphic Adenoma|C1519176|||C1519176|MTH;NCI;OMIM;SNOMEDCT|||  
PSA|EC 3.4.21.77|||||C0138741|NCI|||  
PSA|ENDOMETRIAL PROGESTERONE-INDUCED PROTEIN|||||C1426033|OMIM|||  
PSA|EPIP;PHOSPHOSERINE AMINOTRANSFERASE 1;phosphoserine aminotransferase  
1;PSAT;PSAT1;PSAT1 gene|C1426033|||C1426033|HUGO;MTH;OMIM|||

PSA|Gamma-Seminoprotein;gamma Seminoprotein;gamma seminoprotein;gamma-Seminoprotein;Kallikrein hK3;Kallikrein, hK3;hK3 Kallikrein;P-30 Antigen;P-30 antigen;Prostate Specific Antigen Preproprotein;Prostate specific Ag;prostate specific ag;Semenogelase;Seminin;psa antigen|C0138741|||C0138741|CHV;CSP;LNC;MSH;NCI;NDFRT;SNOMEDCT|||

PSA|HK 003 KALLIKREIN;KALLIKREIN HK 003|||C0138741|MSH|||

PSA|KALLIKREIN 3;Kallikrein-3|C0138741;C1366489|||C0138741;C1366489|NCI;OMIM|||

PSA|KALLIKREIN-RELATED PEPTIDASE 3;kallikrein-related peptidase 3|||C1366489|HUGO;OMIM|||

PSA|KLK2A1;KLK3 wt Allele|C1705954|||C1705954|MTH;NCI|||

PSA|KLK3|C0138741;C1366489;C2987230|||C0138741;C1366489|HUGO;NCI;OMIM|||

PSA|KLK3 Gene;KLK3 gene|C1366489|||C1366489|HUGO;MTH;NCI|||

PSA|Kallikrein 3, (Prostate Specific Antigen) Gene|||C1366489|NCI|||

PSA|Kallikrein 3, (Prostate Specific Antigen) wt Allele|||C1705954|NCI|||

PSA|METALLOPROTEASE MP100;MP100;NPEPPS;NPEPPS gene;metalloproteinase MP100|C1417779|||C1417779|HUGO;MTH;OMIM|||

PSA|PLAG1 wt Allele;Pleiomorphic Adenoma Gene 1 wt Allele|C2347427|||C2347427|MTH;NCI|||

PSA|PROS1;PROS1 gene;PROTEIN S, ALPHA;protein S (alpha)|C1418948|||C1418948|HUGO;LNC;MTH;OMIM|||

PSA|PROTEIN S|C0072393;C1418948|||C1418948|OMIM|||

PSA|PSA|||C0138741;C0201544;C0687688;C1366489;C1417779;C1418948;C1426033;C1519176;C1705954;C2347427|AOD;CHV;CSP;HUGO;NCI;OMIM|||

PSA|PSA - Prostate-specific antigen level;PSA - Serum prostate specific antigen level;PSA Assay;PSA measurement;PSA test;Prostate Specific Antigen Assay;Prostate Specific Antigen Measurement;Prostate specific antigen measurement;Prostatic Specific Antigen Measurement;antigen prostate specific test;antigen prostate specific testing;prostate specific antigen test;prostate-specific antigen test|C0201544|||C0201544|CHV;MTH;NCI;SNOMEDCT|||

PSA|Pisum sativum|C1262903|||1|0.0034|

PSA|Pisum sativum agglutinin|||1|0.0055|1

PSA|Pleomorphic adenoma of salivary gland (disorder)|||C1519176|SNOMEDCT|||

PSA|Power spectral analysis;power spectral analysis|||1|0.0086|1

PSA|Prostate specific antigen (& serum level)|||C0201544|SNOMEDCT|||

PSA|Prostate specific antigen (& serum level) (procedure)|||C0201544|SNOMEDCT|||

PSA|Prostate specific antigen (procedure)|||C0138741|SNOMEDCT|||

PSA|Prostate specific antigen (substance)|||C0138741|SNOMEDCT|||

PSA|Prostate specific antigen measurement (procedure)|||C0201544|SNOMEDCT|||

PSA|Prostate-Specific Antigen [Chemical/Ingredient]|||C0138741|NDFRT|||

PSA|Prostate-specific antigen level|||C0201544|SNOMEDCT|||

PSA|Prostate-specific antigen level (procedure)|||C0201544|SNOMEDCT|||

PSA|SGPA|C0258101;C1519176;C2347427|||C1519176;C2347427|NCI;OMIM|||

PSA|Semenogelase (substance)|||C0138741|SNOMEDCT|||

PSA|activity|C0026606;C0205177;C0439167;C0441655;C1561536|||1|0.0028|

PSA|biochemical|C0205474|||1|0.0026|

PSA|hK3|C1150530;C1415556;C1428139;C1705954|||C1705954|NCI|||

PSA|pacemaker system analysis|||1|

PSA|pathologic spontaneous activity|||1|

PSA|persistent sciatic artery|||1|0.0024|1

PSA|picryl sulfonic acid|||1|

PSA|polar surface area|||1|0.0024|

PSA|polyethylene sulfonic acid|||1|

PSA|polysialic acid|C0071677|||C0071677|MSH;NCI;PDQ|1|0.0225|

PSA|polysubstance abuse|C0747752|||1|

PSA|population spike amplitude|||1|0.0028|

PSA|porcine serum albumin|||1|0.0016|



PTCA|pyrrole-2,3,5-tricarboxylic acid|||||1|0.0064|  
PTFE|Ethene, tetrafluoro-, homopolymer;PTFE;PTFE (polytetrafluoroethylene);PTFE  
- Polytetrafluoroethylene;polytetrafluoroethylene  
(PTFE);Paratetrafluoroethylene;Politef;Polytef;Polytetrafluoroethylene;poly(tetr  
afluoroethylene);polytetrafluoroethylene|C0032611|1|1|C0032611|CHV;CSP;MSH;MTH;N  
DFRT;SNOMEDCT|1|0.9388|1  
PTFE|FEP|C0032611;C0281678|||C0032611|MSH;NDFRT|||  
PTFE|Paratetrafluoroethylene (substance)|||C0032611|SNOMEDCT|||  
PTFE|Polytetrafluoroethylene|||||1|0.0531|  
PTFE|Polytetrafluoroethylene (substance)|||C0032611|SNOMEDCT|||  
PTFE|Polytetrafluoroethylene [Chemical/Ingredient]|||C0032611|NDFRT|||  
PTFE|TFE|C0032611;C0076258|||C0032611|MSH;NDFRT|||  
PTFE|Teflon|C0032611;C0699518|||C0032611|SNOMEDCT|||  
PTFE|polytetrafluoroethylene|||||1|0.0081|  
PTH|Hormone, Parathyroid;PARATHYROID HORMONE;Parathyroid Hormone;Parathyroid  
hormone;Parathyroid hormone, NOS;Parathyroid hormones;parathyroid  
hormone;parathyroid  
hormones|C0030520;C1882913|1|1|C0020063;C0030520;C1419072;C1882913|AOD;CHV;CSP;F  
MA;HUGO;LCH;LNC;MSH;MTH;NCI;NDFRT;OMIM;PDQ;SNOMEDCT|1|0.9204|1  
PTH|Intact parathyroid hormone (substance)|||C0030520|SNOMEDCT|||  
PTH|PARATHORMONE;Parathormone;Parathormone,  
NOS;parathormone;PARATHYRIN;Parathyrin;parathyrin;PTH - Parathyroid  
hormone;Parathormone preparation;Parathormone preparation, NOS;Parathyroid  
Hormone [EPC];Parathyroid extract;Parathyroid extract, NOS;Parathyroid hormone  
agent;Parathyroid hormone preparation;Parathyroid hormone preparation,  
NOS;Parathyroid-class Hormone;[HS600]  
PARATHYROID|C0030520|||C0020063;C0030520;C0202159;C1419072|AOD;CHV;CSP;HUGO;LNC;  
MSH;NCI;NDFRT;OMIM;PDQ;SNOMEDCT|1|0.0432|  
PTH|PARATHYROID;Parathyroid;parathyroid|C0030518;C0030520|||C0030520|NDFRT;USPMG  
;VANDF|1|0.0037|  
PTH|PTH|||C0020063;C0030520;C1419072;C1705340|CHV;CSP;HUGO;NCI;OMIM;PDQ|||  
PTH|PTH (1-84)|||C0030520|MSH;NDFRT|||  
PTH|PTH Gene;PTH gene;Parathyroid Hormone Gene;parathyroid hormone  
gene;parathyroid hormone 1|C1419072|||C1419072|HUGO;MTH;NCI|1|0.0015|  
PTH|PTH protein, human;parathyroid hormone, human|C0020063|||C0020063|MSH;MTH|||  
PTH|PTH wt Allele;Parathyroid Hormone wt Allele|C1705340|||C1705340|MTH;NCI|||  
PTH|PTH1|C1419072;C1826737|||C1419072|HUGO|||  
PTH|Parathormone (substance)|||C0030520|SNOMEDCT|||  
PTH|Parathyroid Hormone (1-84)|||C0030520|MSH;NDFRT|||  
PTH|Parathyroid Hormone [Chemical/Ingredient]|||C0030520|NDFRT|||  
PTH|Parathyroid hormone (substance)|||C0030520|SNOMEDCT|||  
PTH|Parathyroid hormone agent (substance)|||C0030520|SNOMEDCT|||  
PTH|Parathyroid hormone preparation (product)|||C0030520|SNOMEDCT|||  
PTH|Parathyroid hormone preparation (substance)|||C0030520|SNOMEDCT|||  
PTH|Posttetanic hyperpolarization;post-tetanic hyperpolarization|||||1|0.0024|  
PTH|chest wall elastic recoil pressure|||||1|  
PTH|hPTH(1-84)|||C0020063|MSH|||  
PTH|parathyroid hormone 1-34|||||1|0.0007|  
PTH|parathyroid hormone levels|||||1|0.002|  
PTH|pathologic|C1521733|||||1|  
PTH|pathology|C0030664;C0205469;C0677042|||||1|  
PTH|peptidyl-tRNA hydrolase|C0051616|||||1|0.0035|  
PTH|phenylthiohydantoin|C0031504|||C0031504|AOD;MSH;NDFRT|1|0.007|  
PTH|plasma parathyroid hormone|||||1|  
PTH|plasma thromboplastin|||||1|  
PTH|post-transfusion hepatitis;posttransfusion  
hepatitis|C0520788|||C0520788|CSP;SNOMEDCT|1|0.0111|1

PTH|posttraumatic headache|C0032816|||C0032816|CHV;MSH;SNOMEDCT|||  
PTH|pressure threshold;threshold pressure|||1|0.0046|  
PTH|primary thrombocythemia|C0040028|||1|  
PTH|prior to hospitalization|||1|  
PT|^patient;PATIENT;Patient;Patients;^Patient;patient;patients|C0030705|||C0030705;C1550655;C1578478;C1578479;C1578480;C1578481;C1578483;C1578484;C1578485;C1578486;C1705908|AOD;CHV;HL7V2.5;HL7V3.0;LCH;LNC;MSH;MTH;NCI;SNOMEDCT|1|0.0126|1  
PT|Coagulation Factor II (Thrombin) wt Allele|||C2826539|NCI|||  
PT|F2 wt Allele|C2826539|||C2826539|MTH;NCI|||  
PT|LAY USER/PATIENT|||C0030705|NCI|||  
PT|Modalities, Physical Therapy;Modality, Physical Therapy;Physical Therapy Modalities;Physical Therapy Modality;PT - Physiotherapy;Physiatic Procedure;Physiatic procedure;Physiatic procedure, NOS;Physical Medicine Procedure;Physical medicine procedure;Physical medicine procedure, NOS;Physical Therapeutics;Physical Therapy Procedure;Physical therapy procedure;Physical therapy procedure, NOS;physical procedures therapy;procedure physical therapy;Physical Therapy Technique;Physical Therapy Techniques;Techniques, Physical Therapy;physical technique therapy;physical therapy techniques;Physical therapy treatment;physical therapy treatment;physical therapy treatments;treatment physical therapy;Physiotherapies (Techniques);Physiotherapy (Techniques);physiotherapy techniques;Physiotherapy;Physiotherapy, NOS;Therapy - physio.;physiotherapies;physiotherapy;Physiotherapy Procedure;Physiotherapy procedure;Physiotherapy procedure,  
NOS|C0949766|||C0949766|AOD;CHV;LNC;MSH;NCI;PDQ;SNOMEDCT|1|0.007|  
PT|Nuclei parataeniales thalami;Nucleus parataenialis;Nucleus parataenialis thalami;Nucleus paratenialis thalami;Nucleus, Paratenial Thalamic;Paratenial Thalamic Nucleus;Paratenial thalamic nucleus;Thalamic Nucleus, Paratenial;Structure of paratenial nucleus of thalamus|C0175252|||C0175252|FMA;MSH;SNOMEDCT|||  
PT|Nucleus parataenialis (Hassler)|||C0175252|FMA|||  
PT|Nucleus, Paratenial;Parataenial nucleus;Paratenial Nucleus;Paratenial nucleus;paratenial nucleus;Parataenial nucleus of thalamus;Paratenial nucleus of thalamus|C0175252;C1828005|||C0175252|CHV;FMA;MSH;MTH;SNOMEDCT|||  
PT|One stage prothrombin time|||C0033707|SNOMEDCT|||  
PT|One stage prothrombin time (procedure)|||C0033707|SNOMEDCT|||  
PT|PHYSICAL THER TECHNIQUES|||C0949766|MSH|||  
PT|PHYSIOTHER PRACTICE|||C0949766|MSH|||  
PT|PINT;Pint;pint|C0560012|||C0560012|CHV;HL7V3.0;MTH;NCI;SNOMEDCT|||1  
PT|PLATINUM;Platinum;Platinum, NOS;platinum;Pt - Platinum;platinum (Pt)|C0032207;C1171558;C1553253|||C0032207|AOD;CHV;CSP;LCH;LNC;MSH;MTH;NCI;NDFRT;SNOMEDCT|1|0.0644|1  
PT|PO|C0442027|||C0032729|NCI|||  
PT|PORTUGAL;Portugal;portugal|C0032729|||C0032729|AOD;CHV;LCH;MSH;MTH;NCI;SNOMEDCT|||  
PT|PRT|C0020687;C0032729;C1152182|||C0032729|NCI|||  
PT|PT;Pt;pT;pt|||C0030705;C0032207;C0032729;C0033707;C0175252;C0560012;C0949766;C1270004;C1442880;C1705337;C2347664;C2826539|CHV;FMA;LNC;MTH;NCI;SNOMEDCT|||  
PT|PT - Prothrombin time;PT assay;Prothrombin Time;Prothrombin Times;Prothrombin time;Time, Prothrombin;Times, Prothrombin;prothrombin time;prothrombin times;Prothrombin time assay;Prottime;Quick one stage prothrombin time;prothrombin test|C0033707|1|0.044|C0033707|AOD;CHV;CSP;MSH;MTH;NCI;SNOMEDCT|1|0.3054|1  
PT|PT Term Type|C1705337|||C1705337|MTH;NCI|||  
PT|PTT - Prothrombin time|||C0033707|SNOMEDCT|||  
PT|Pain threshold;pain threshold|C0162703|||C0162703|CHV;CSP;MSH;NCI;SNOMEDCT|1|0.0097|  
PT|Parataenial nucleus of thalamus (body structure)|||C0175252|SNOMEDCT|||

PT|Pathologic T category;TNM category pT;pT category;pT stage|C1270004|||C1270004|MTH;SNOMEDCT|||  
PT|Patient (person)|||C0030705|SNOMEDCT|||  
PT|Physical Medicine and Rehabilitation Procedures|||C0949766|MTHCH|||  
PT|Physical Therapy;Physical therapy;physical therapies;physical therapy;therapy physical|C0699718;C0949766|1|0.91|C0699718;C0949766;C1547999;C1552441|AOD;CCS;CH V;CSP;HL7V2.5;HL7V3.0;LCH;LNC;MEDLINEPLUS;MTH;NCI|1|0.0281|1  
PT|Physical medicine procedure (procedure)|||C0949766|SNOMEDCT|||  
PT|Physical medicine procedure (regime/therapy)|||C0949766|SNOMEDCT|||  
PT|Physical therapy procedure (procedure)|||C0949766|SNOMEDCT|||  
PT|Physical therapy procedure (regime/therapy)|||C0949766|SNOMEDCT|||  
PT|Planum Temporale|||1|0.0164|  
PT|Platinum (substance)|||C0032207|SNOMEDCT|||  
PT|Platinum Black;Pt element|C0032207|||C0032207|CSP;MSH;NDFRT|||  
PT|Platinum [Chemical/Ingredient]|||C0032207|NDFRT|||  
PT|Point in time|C1442880;C1552684;C2348792|||C1442880|MTH|||  
PT|Portugal (geographic location)|||C0032729|SNOMEDCT|||  
PT|Preferred Term|C1709637;C2347664|||C2347664|MTH;NCI|||  
PT|Prothrombin Time Test;prothrombin time test;prothrombin time (PT) test|C0033707;C0491338|||C0033707|CHV;NCI|||  
PT|Prothrombin time (procedure)|||C0033707|SNOMEDCT|||  
PT|Structure of paratenial nucleus of thalamus (body structure)|||C0175252|SNOMEDCT|||  
PT|Twitch tension|||1|0.0097|  
PT|[pt\_us]|||C0560012|NCI|||  
PT|depth of tumor invasion|||1|0.0015|  
PT|isometric twitch|||1|0.0018|  
PT|pT category (observable entity)|||C1270004|SNOMEDCT|||  
PT|pT category (tumor staging)|||C1270004|SNOMEDCT|||  
PT|pT stage (tumor staging)|||C1270004|SNOMEDCT|||  
PT|palatal tremor|C1837546|||C1837546|OMIM|||  
PT|palatine tonsil|C0040421;C1280736|||C0040421;C1280736|CHV;FMA;MSH;MTH;NCI;SNOMEDCT;UWDA|||  
PT|pancreas transplantation|C0030275|||C0030275|CHV;CSP;MEDLINEPLUS;MSH;MTH;MTHCH;NCI|1|0.0029|  
PT|paralytic tremor|||1|0.0044|  
PT|parathyroid|C0030518;C0030520|||C0030517;C0030518;C0030520|AOD;CHV;CST;LNC;NCI;NDFRT;SNOMEDCT;USPMG;VANDF|1|0.01|  
PT|parathyroid hormone|C0030520;C1882913|||1|  
PT|paroxysmal tachycardia|C0039236|||1|  
PT|pars tensa|C0229372|||C0229372|SNOMEDCT|||  
PT|pars tuberalis|||1|0.0284|  
PT|part|C0449719;C1709471|||1|  
PT|patch test|C0030646|||C0030646|AOD;CHV;MSH;SNOMEDCT|||  
PT|patellar tendon|C0206332;C1827621|||C0206332;C1827621|CHV;MSH;SNOMEDCT|1|0.0132|  
PT|peak torque|||1|0.0261|  
PT|percutaneous tracheostomy|C0584877|||C0584877|CHV;SNOMEDCT|1|0.0035|  
PT|pericardial tamponade|C0007177|||1|  
PT|perinuclear theca|C2246398|||C2246398|GO|1|0.0038|  
PT|permanent and total|||1|  
PT|permeability transition|||1|0.024|  
PT|permissive temperature|||1|0.0015|  
PT|pertussis|C0043167|||C0031237;C0043167|AOD;CHV;COSTAR;CSP;DXP;HL7V2.5;HL7V3.0;MEDLINEPLUS;MSH;MTH;NCI;NDFRT;SNOMEDCT|||



PT|proximal|C0205107|||||1|0.0035|  
PT|proximal tubular|||||1|0.0161|  
PT|proximal tubule|C0022677|||C0022677|AOD;CHV|1|0.0428|1  
PT|pseudotumor|C0033844|||||1|  
PT|psychasthenia|C0338900|||||1|  
PT|ptaquiloside|C0072576|||C0072576|MSH|1|0.0029|  
PT|pulmonary thrombosis|C0151946|||||1|  
PT|pulmonary toilet|||||1|  
PT|pulmonary trunk|C0034052|||C0034052|CHV;FMA;NCI;SNOMEDCT;UWDA|1|0.0041|1  
PT|pulmonary  
tuberculosis|C0041327|||C0041327|AOD;CHV;ICD9CM;MSH;NCI;NDFRT;SNOMEDCT|1|0.0076|  
1  
PT|pure tone|||||1|  
PT|putamen|C0034169;C1281335|||C0034169;C1281335|AOD;CHV;CSP;FMA;MSH;NCI;SNOMEDC  
T|||  
PT|pyramidal tract|C0034229|||C0034229|CHV;CSP;FMA;LCH;MSH;SNOMEDCT|1|0.0246|1  
PT|pyrithiamine|C0034294|||C0034294|AOD;MSH;NDFRT|||  
PT|temporal plane|C1184151|||||1|  
PT|tests|C0022885;C0392366|||||1|0.0035|  
PT|tissue|C0040300;C1547928|||||1|0.0029|  
PT|tracheal pressure|||||1|0.0059|  
PT|treatment|C0039798;C0087111;C1522326;C1533734;C1705169;C3161471|||||1|0.0044|  
PT|tumor stage|C1300072|||||1|0.002|  
PT|tumors|C0027651|||||1|0.005|  
PT|twitch force|||||1|0.0023|  
PTSD|Combat fatigue;combat fatigue;Neuroses, Post Traumatic;Neuroses, Post-  
Traumatic;Neuroses, Posttraumatic;Post-Traumatic Neuroses;Posttraumatic  
Neuroses;POST TRAUMATIC STRESS DISORDER;Post Traumatic Stress Disorders;Post-  
Traumatic Stress Disorder;Post-Traumatic Stress Disorders;Post-traumatic stress  
disorder;Stress Disorder, Post Traumatic;Stress Disorder, Post-Traumatic;Stress  
Disorders, Post Traumatic;Stress Disorders, Post-Traumatic;disorder, post-  
traumatic stress;post traumatic stress disorder;post traumatic stress  
disorders;post-traumatic stress disorder;post-traumatic stress  
disorders;POSTTRAUMATIC STRESS DISORDERS;Posttraumatic Stress  
Disorder;Posttraumatic Stress Disorders;Posttraumatic stress  
disorder;Posttraumatic stress disorder NOS;Posttraumatic stress disorder,  
NOS;Stress Disorder, Posttraumatic;Stress Disorders, Posttraumatic;posttraumatic  
stress disorder;posttraumatic stress disorders;PTSD;PTSD - Post-traumatic stress  
disorder;Post-Traumatic Stress Disorder (PTSD);post-traumatic stress disorder  
(PTSD);Post-traumatic stress syndrome;post traumatic stress syndrome;post-  
traumatic stress syndrome;Traumatic neuroses;Traumatic neurosis;traumatic  
neurosis;battle  
fatigue|C0038436|1|1|C0038436|AOD;CHV;COSTAR;CSP;ICD9CM;LCH;LNC;MEDLINEPLUS;MSH;  
MTH;MTHICD9;NCI;NDFRT;PDQ;SNOMEDCT|1|1|1  
PTSD|Combat fatigue (disorder)|||C0038436|SNOMEDCT|||  
PTSD|POST TRAUMATIC STRESS DIS;STRESS DIS POST TRAUMATIC|||C0038436|MSH|||  
PTSD|POSTTRAUMATIC STRESS DIS;Posttraumatic stress dis;STRESS DIS  
POSTTRAUMATIC|||C0038436|ICD9CM;MSH|||  
PTSD|Post-traumatic stress disorder (disorder)|||C0038436|SNOMEDCT|||  
PTSD|Posttraumatic stress disorder (disorder)|||C0038436|SNOMEDCT|||  
PTSD|Stress Disorders, Post-Traumatic [Disease/Finding]|||C0038436|NDFRT|||  
PTSD|[X]Combat fatigue|||C0038436|SNOMEDCT|||  
PTT|2beta-propanoyl-3beta-(4-tolyl)-tropane|||||1|0.0662|  
PTT|APTT;aPTT;apTT;APTT - Activated partial thromboplastin time;Activated  
Partial Thromboplastin Time;Activated partial thromboplastin time;Partial  
thromboplastin time activated;Partial thromboplastin time, activated;Activated  
Partial Thromboplastin Time measurement;PTT;PTT - Partial thromboplastin

time;partial thromboplastin time: PTT;PTT, activated;activated ptt;Partial  
Thromboplastin Time;Thromboplastin Time, Partial;partial thromboplastin  
time|C0030605|1|1|C0030605|AOD;CHV;MSH;MTH;NCI;SNOMEDCT|||1  
PTT|Activated Partial Thromboplastin Time (APTT) test|||C0030605|CHV|||  
PTT|Activated partial thromboplastin time (procedure);Partial thromboplastin  
time activated (procedure);Partial thromboplastin time, activated  
(procedure)|||C0030605|SNOMEDCT|||  
PTT|PTT assay|||C0030605|SNOMEDCT|||  
PTT|partial thromboplastin|||1|0.0464|  
PTT|particle transport time|||1|1|  
PTT|patellar tendon transfer|||1|1|  
PTT|pharyngeal transit time|||1|1|  
PTT|platelet transfusion therapy|||1|1|  
PTT|poly(trimethylene terephthalate)|C1567176|||C1567176|MSH|||  
PTT|posterior tibial tendinitis|C0554595|||1|1|  
PTT|posterior tibial tendon|||1|0.106|1|  
PTT|posterior tibial transfer|||1|1|  
PTT|protein truncation test;protein truncation  
testing|C2737268|||C2737268|LNC|1|0.7219|1|  
PTT|pulmonary transit time|||1|1|  
PTT|pulse transit time|||1|1|  
PTT|pure tone threshold|||1|1|  
PTT|threshold|C0449864|||1|0.0596|  
PVC|CDDP/CTX/VP-16|||C0280556|NCI;PDQ|||  
PVC|CEP|||C0280556|PDQ|||  
PVC|CVP|C0056633;C0280556|||C0280556|NCI;PDQ|||  
PVC|Chlorethylene polymer;Chloride, Polyvinyl;POLYVINYL CHLORIDE;Polyvinyl  
Chloride;Polyvinyl chloride;polyvinyl chloride;Chloroethylene  
Homopolymer;Homopolymer, Chloroethylene;Chloroethylene Polymer;Chloroethylene  
polymer;Polymer, Chloroethylene;Ethene, chloro-, homopolymer;PVC - Polyvinyl  
chloride;Polychloroethylene;Polymer, Vinyl Chloride;Vinyl Chloride  
Polymer;vinylchloride  
polymer;Vinyl;vinyl;polyvinylchloride|C0032624|||C0032624|CHV;CSP;LCH;MSH;MTH;ND  
FRT;SNOMEDCT;VANDF|1|0.7951|1|  
PVC|Cisplatin/Cyclophosphamide/Etoposide;cisplatin/cyclophosphamide/etoposide|||  
|C0280556|NCI;PDQ|||  
PVC|ECTOPIC BEATS (VENTRICULAR);Ectopic Beat, Ventricular;Ectopic Beats,  
Ventricular;Ventricular Ectopic Beat;Ventricular Ectopic Beats;Ventricular  
ectopic beats;ventricular ectopic beat;EXTRASYSTOLES VENTRICULAR;Extrasystole,  
Ventricular;VENTRICULAR EXTRASYSTOLES;Ventricular Extrasystole;Ventricular  
Extrasystoles;Ventricular extrasystoles;ventricular extrasystole;ventricular  
extrasystoles;PREMATURE VENTRICULAR BEATS;Premature Ventricular Beat;Premature  
Ventricular Beats;VENTRICULAR BEAT PREMATURE;Ventricular Beat,  
Premature;Ventricular Beats, Premature;Ventricular premature beats;premature  
ventricular beat;premature ventricular beats;ventricular premature  
beat;ventricular premature beats;PREMATURE VENTRICULAR COMPLEX;Premature  
Ventricular Complex;Premature ventricular complex;Ventricular Complex,  
Premature;Ventricular Premature Complex;Ventricular Premature  
Complexes;Ventricular premature complex;premature ventricular complex;premature  
ventricular complexes;ventricular premature complexes;VPC;VPC'S;Ventricular  
ectopic complex;Ventricular premature depolarisation;Ventricular premature  
depolarization;Ventricular premature systoles;ventricular ectopic  
activity;ventricular  
ectopy|C0151636|||C0151636|CHV;COSTAR;CST;DXP;MSH;NCI;NDFRT;SNOMEDCT|1|0.0461|1|  
PVC|Late Endosome;Late endosome;late endosome;prevacuolar  
compartment|C1166848|||C1166848|FMA;GO;MTH;NCI;UWDA|1|0.0109|  
PVC|PCE|C0246101;C0280556;C1588205|||C0280556|NCI;PDQ|||

PVC|PREMATURE VENTRICULAR CONTRACTION;PREMATURE VENTRICULAR CONTRACTIONS;Premature Ventricular Contraction;Premature Ventricular Contractions;Premature ventricular contractions;VENTRICULAR CONTRACTIONS PREMATURE;Ventricular Contraction, Premature;Ventricular Contractions, Premature;Ventricular premature contractions;premature ventricular contraction;premature ventricular contractions|C0151636;C0488307|1|0.998|C0151636|COSTAR;CSP;CST;DXP;LNC;MSH;MTH;NDFRT;SNOMEDCT|1|0.1194|1

PVC|PVC;PVC'S;pvc|C0151636;C1883717|||C0032624;C0151636;C0280556;C1166848|CHV;CSP;CST;DXP;GO;MSH;NCI;NDFRT;PDQ;SNOMEDCT|||

PVC|PVC (polyvinylchloride)|||C0032624|CSP|||

PVC|Polyvinyl Chloride [Chemical/Ingredient]|||C0032624|NDFRT|||

PVC|Polyvinyl chloride (substance)|||C0032624|SNOMEDCT|||

PVC|VCP-1;cisplatin/cyclophosphamide/etoposide protocol|C0280556|||C0280556|MTH;NCI;PDQ|||

PVC|VPB|C0151636;C0279462|||C0151636|DXP|||

PVC|Ventricular Premature Complexes [Disease/Finding]|||C0151636|NDFRT|||

PVC|Ventricular ectopic beats (disorder)|||C0151636|SNOMEDCT|||

PVC|Ventricular ectopic beats (finding)|||C0151636|SNOMEDCT|||

PVC|Ventricular ectopics;ventricular ectopic;ventricular ectopics|C0151636;C0488470|||C0151636|CHV;LNC|||

PVC|Ventricular premature beats (disorder)|||C0151636|SNOMEDCT|||

PVC|Ventricular premature complex (disorder)|||C0151636|SNOMEDCT|||

PVC|paravestibular canaliculus|||1|0.0122|

PVC|peripheral venous catheterization|C0031127|||1|

PVC|persistent vaginal cornification|||1|

PVC|polyethylene vacuum cup|||1|

PVC|porcelain veneer crown|||1|

PVC|postvoiding cystogram|||1|

PVC|predicted vital capacity|||1|

PVC|primary visual cortex|C0038446;C2336068|||C0038446;C2336068|FMA;SNOMEDCT|||1

PVC|pulmonary venous capillary|||1|

PVC|pulmonary venous congestion|C0582411|1|0.002|||1|

PVC|vaginal cornification|||1|0.0163|

PVC|ventricular ectopic complex (PVC)|||C0151636|CHV|||

PVC|ventricular ectopic complex (PVC) [heart disease]|||C0151636|CHV|||

QD|Daily;daily;Each day;each day;Every day;every day;QD;everyday|C0332173|1|1|C0332173|CHV;MTH;NCI;SNOMEDCT|||1

QD|Daily (qualifier value)|||C0332173|SNOMEDCT|||

QD|Daily -RETIRED-|||C0332173|SNOMEDCT|||

QD|dialysate flow|||1|0.0609|1

QD|once a day|||1|0.0783|

QD|once daily|C0556983|||1|0.5217|

QD|quantum dot|C1258084|||C1258084|MSH;NCI|1|0.1478|

QD|quaque die|||C0332173|NCI|||

QD|quinidine|C0034414|||C0034414|AOD;CHV;CSP;LCH;LNC;MSH;MTH;NCI;NDFRT;PDQ;RXNORM;SNOMEDCT;USPMG;VANDF|1|0.1913|

QHS|HS;Once a day, at bedtime|C1275563|||C1275563|HL7V3.0;MTH;SNOMEDCT|||

QHS|Once a day, at bedtime (qualifier value)|||C1275563|SNOMEDCT|||

QHS|at bedtime|||1|0.000|||1|

QHS|qHS;qh;qhs|C0558292;C1275563|||C1275563|CHV;SNOMEDCT|||

QHS|qinghaosu|C0052430|||1|1|

QHS|quantitative hepatobiliary scintigraphy|||1|

QTC|Bazett's formula|||1|0.0306|

QTC|QT corrected for heart rate|||1|

QTC|QT interval corrected for heart rate|||1|0.104|

QTC|corrected|C0205202|||1|0.0367|

QTC|corrected QT|1|0.3914|  
QTC|corrected QT interval|1|0.4373|  
QTC|electrocardiograph waves|1|1.000|  
QTC|quantitative tip culture|1|  
RAP|A2RAP;LRPAP1;LRPAP1 gene;RAP|C1416920||C1416920|HUGO;MTH;OMIM||  
RAP|ALPHA-2-MACROGLOBULIN RECEPTOR-ASSOCIATED  
PROTEIN;HBP44|C0173695;C1416920||C1416920|HUGO;OMIM||  
RAP|LOW DENSITY LIPOPROTEIN RECEPTOR-RELATED PROTEIN-ASSOCIATED PROTEIN 1;low  
density lipoprotein receptor-related protein associated protein  
1||C1416920|HUGO;OMIM||  
RAP|MRAP|C1416920;C1537935||C1416920|OMIM||  
RAP|RNAIII activating protein|1|  
RAP|Rehabilitation Activities Profile|1|0.012|  
RAP|Relative Aspects of Potential|1|  
RAP|atrial pacing|1|0.0285|  
RAP|rapamycin|C0072980||C0072980|CHV;CSP;MSH;NCI;NDFRT;PDQ;SNOMEDCT|1|0.072|  
RAP|receptor-associated protein|1|0.2909|1  
RAP|recurrent abdominal pain|C2585575||C2585575|OMIM;SNOMEDCT|1|0.1424|1  
RAP|recurrent acute pancreatitis|C0267937||C0267937|SNOMEDCT||  
RAP|regional acceleratory phenomenon|1|0.0165|  
RAP|regression-associated protein|1|  
RAP|relative average perturbation|1|  
RAP|remote access perfusion|1|  
RAP|renal arterial pressure|1|0.069|  
RAP|renal artery pressure|1|  
RAP|renal artery pseudoaneurysm|1|  
RAP|resistance-area product|1|0.0075|  
RAP|retinal angiomatous proliferation|1|0.015|  
RAP|rheumatoid arthritis precipitin|1|  
RAP|right abdominal pain|1|  
RAP|right atrial|1|0.0225|  
RAP|right atrial pressure|C0456165|1|1.000|C0456165|CHV;SNOMEDCT|1|0.3238|1  
RAP|robot-assisted laparoscopy|1|  
RA|ANEMIA REFRACTORY;ANEMIA, REFRACTORY;Anemia, Refractory;Anemias,  
Refractory;REFRACTORY ANEMIA;Refractory Anemia;Refractory Anemias;Refractory  
anaemia;Refractory anemia;Refractory anemia, NOS;Refractory anemias;anemia  
refractory;refractory anaemia;refractory anemia;refractory anemias;Refractory  
anemia  
(RA)|C0002893;C2981142||C0002893;C2981142|CHV;CST;DXP;MSH;MTH;MTHICD9;NCI;NDFRT  
;PDQ;SNOMEDCT|1|0.0193|1  
RA|ARTHRITIS RHEUMATOID;ARTHRITIS, RHEUMATOID;Arthritis, Rheumatoid;RHEUMATOID  
ARTHRITIS;Rheumatoid Arthritis;Rheumatoid arthritis;Rheumatoid arthritis  
NOS;rheumatoid  
arthritis|C0003873;C2697391|1|0.132|C0003873;C2697391|AIR;AOD;CHV;COSTAR;CSP;CST  
;DXP;ICD9CM;LNC;MEDLINEPLUS;MSH;MTH;NCI;NDFRT;OMIM;QMR;SNOMEDCT|1|0.6896|1  
RA|ARTHRITIS, RHEUMATIC;rheumatic  
arthritis|C0003873;C0035436||C0003873;C0035436|DXP;MSH;NDFRT||  
RA|Anemia, Refractory [Disease/Finding]||C0002893|NDFRT||  
RA|Aregenerative Anemia|C0002893;C0553669||C0002893|NCI||  
RA|Arthritis or polyarthritis, atrophic||C0003873|MTHICD9||  
RA|Arthritis or polyarthritis, rheumatic||C0003873|MTHICD9||  
RA|Arthritis, Rheumatoid [Disease/Finding]||C0003873|NDFRT||  
RA|Atrophic Arthritis;Atrophic arthritis;atrophic arthritis;Chronic rheumatic  
arthritis;RA - Rheumatoid arthritis;RhA - Rheumatoid arthritis;Rheumatic  
gout;gout rheumatic;Rheumatoid disease|C0003873||C0003873|CHV;NCI;SNOMEDCT||  
RA|IL-1 receptor antagonist|1|0.0028|  
RA|RA;Ra||C0002893;C0003873;C0034571;C0034625|MEDLINEPLUS;MSH;NCI;OMIM||

RA|RADIOGR||||C0034571|MSH|||  
RA|RHEUMATOID ARTHRITIS, SUSCEPTIBILITY TO||||C0003873|OMIM|||  
RA|Radionuclide angiography;radionuclide  
angiography|C0034604|||C0034604|CHV;MSH|1|0.0005|1  
RA|Radium;Radium,  
NOS;radium|C0034625|||C0034625|AOD;CHV;LCH;MSH;MTH;NCI;NDFRT;SNOMEDCT|||1  
RA|Radium (substance)|||C0034625|SNOMEDCT|||  
RA|Radium [Chemical/Ingredient]||||C0034625|NDFRT|||  
RA|Rayleigh number|||||||1  
RA|Refractory anaemia (disorder);Refractory anemia  
(disorder)|||C0002893|SNOMEDCT|||  
RA|Refractory anaemia -RETIRED-;Refractory anemia -RETIRED-  
||||C0002893|SNOMEDCT|||  
RA|Refractory anemia (morphologic abnormality)|||C0002893|SNOMEDCT|||  
RA|Renin activity;renin activity|C1150120|||C1150120|CHV;GO;MTH|1|0.001|1  
RA|Renin-angiotensin;renin-angiotensin|||||1|0.002|1  
RA|Repeated acquisition|||||1|0.0004|  
RA|Retinol acetate;retinyl acetate|C0073109|||||1|0.002|  
RA|Rheumatoid arthritis (disorder);Rheumatoid arthritis NOS  
(disorder)|||C0003873|SNOMEDCT|||  
RA|Risk assessment|C0086930|||||1|0.0007|  
RA|Rokitansky-Aschoff|||||||1  
RA|X-ray|C0034571;C0043299;C0043309;C1306645;C1962945|||C0034571|MSH|||  
RA|X-ray diagnosis|C0034571;C1578656|||C0034571|MSH|||  
RA|X-ray image;roentgenographic|C0034571|||C0034571|MSH;MTH|||  
RA|afferent|C0205115|||||1|0.0008|  
RA|afferent arteriolar resistance|||||||1|0.0008|  
RA|airway resistance|C0001884|||C0001884|AOD;CHV;MSH;SNOMEDCT|||  
RA|amplitude|C2346753|||||1|0.0005|  
RA|analysis|C0002778;C0936012;C1524024|||||1|0.0005|  
RA|appearance rate;rate of appearance||||||1|0.0098|  
RA|arterial|C0003842;C0221464|||||1|0.0009|  
RA|arterial resistance|C0429119|||||1|0.0007|  
RA|glucose production||||||1|0.0051|  
RA|nucleus robustus archistriatalis||||||1|0.0019|  
RA|proliferative arthritis|C0003873;C1306838|||C0003873|CHV|||  
RA|radial artery|C0162857;C1278948|||||1|0.0071|1  
RA|radioactive|C0034553;C1514697;C1548770;C1550589|||C0034553;C1514697;C1548770;  
C1550589|HL7V2.5;HL7V3.0;MTH;NCI|||1  
RA|radioactivity|C0034553|||C0034553|AOD;CHV;LCH;LNC;MSH;NCI;SNOMEDCT|||  
RA|radiographic absorptiometry||||||1|0.0013|1  
RA|radiography|C0034571;C0043299;C1962945|||C0034571|MSH|||  
RA|radionuclide angiogram|||||||1  
RA|radionuclide angiograph|||||||1  
RA|ragged||||||1|0.0006|  
RA|ragocyte|C0333833|||||||1  
RA|ragweed antigen|||||||1  
RA|rales|C0034642;C0240859|||||||1  
RA|rapidly adapting||||||1|0.0045|  
RA|rat aorta|C1882561|||||1|0.0005|  
RA|rates||||||1|0.0006|  
RA|rates of glucose appearance||||||1|0.0018|  
RA|reactive arthritis|C0085435|||||||1  
RA|reading age|||||||1  
RA|readmission|C1548168|||||||1  
RA|reciprocal asymmetrical|||||||1  
RA|rectus abdominis|C0206066;C1305918|||||1|0.0029|

RA|refractory ascites|||||||1  
RA|regional anaesthesia;regional anesthesia|C0002911|||||1|0.0012|1  
RA|relative anisotropy||||||1|0.001|  
RA|remittance advice|||||||1  
RA|renal  
artery|C0035065;C1278951|||C0035065;C1278951|AOD;CHV;CSP;FMA;LCH;LNC;MSH;NCI;SNO  
MEDCT;UWDA|1|0.0027|1  
RA|repeat action|||||||1  
RA|residual air|||||||1  
RA|resistance to reabsorption of CSF||||||1|0.0006|  
RA|retinoic  
acid|C0040845|1|0.002|C0040845|AOD;CHV;MSH;NCI;NDFRT;PDQ;SNOMEDCT|1|0.1878|1  
RA|retrograde amnesia|C0002624|||||1|0.0011|  
RA|rheumatoid||||||1|0.0023|  
RA|rheumatoid agglutinin|||||||1  
RA|rheumatoid arthritic||||||1|0.0013|  
RA|rheumatoid arthritis patients||||||1|0.0006|  
RA|rheumatoid arthritis systemic||||C0003873|CHV|||  
RA|rhinocerebral aspergillosis|||||||1  
RA|rhodotorulic acid|C0073212|||C0073212|MSH|||  
RA|riboadenylate|||||||1  
RA|ricin A chain|C0035570|||||1|0.0005|  
RA|right|C0205090|||||1|0.0007|  
RA|right angle|||||||1  
RA|right  
arm|C0230346;C1268255|||C0230346;C1268255|CHV;FMA;HL7V2.5;SNOMEDCT;UWDA|||1  
RA|right atria;right  
atrium|C0225844;C1269890|1|0.788|C0225844;C1269890|AOD;CHV;FMA;MSH;NCI;SNOMEDCT;  
UWDA|1|0.0137|1  
RA|right atrial||||||1|0.0118|1  
RA|right atrial pressure|C0456165|||||1|0.0006|  
RA|right auricle|C0225845|||C0225845|FMA;UWDA|||1  
RA|risk area||||||1|0.0006|  
RA|robust nucleus of the archistriatum||||||1|0.0057|  
RA|roentgenography|C0034571;C0043299;C1306645;C1962945|||C0034571|MSH|||  
RA|room air|||1|0.072|||1|0.0034|1  
RA|rotational angiography|||||||1  
RA|rotational atherectomy|C0162655|||||1|0.0017|1  
RA|rounded atelectasis|C2062952|||||1|0.0007|  
RA|surface roughness||||||1|0.0033|  
RBC|Anucleate erythrocyte;Blood Corpuscle, Red;Blood Corpuscles, Red;Corpuscle,  
Red Blood;Corpuscles, Red Blood;Red Blood Corpuscle;Red Blood Corpuscles;Red  
blood corpuscle;Red blood corpuscule;blood corpuscles red;red blood  
corpuscle;RBC - Red blood cell;blood cells rbc red;Red Cell;Red  
cells;Reticuloendothelial System, Erythrocytes;blood  
erythrocytes;erythrocytic|C0014792|||C0014792|CHV;FMA;MSH;NCI;SNOMEDCT;UWDA|||  
RBC|Blood Cell Count, Red;Red Blood Cell Count;Red blood cell count;Red blood  
cell count NOS;blood cell count red;blood cell counts red;blood cells count  
red;cell red blood count;red blood cell count;red cell blood  
count|C0014772;C1287262|||C0014772|AOD;CHV;MSH;NCI;SNOMEDCT|1|0.0214|  
RBC|Blood Cell, Red;Blood Cells, Red;Red Blood Cell;Red Blood Cells;Red blood  
cell;Red blood cells;bloods cells red;cells red blood;red blood cell;red blood  
cells|C0014772;C0014792;C0439179;C1277078|1|1|C0014772;C0014792|AOD;CHV;CSP;FMA;  
HL7V2.5;MSH;NCI;SNOMEDCT;UWDA|1|0.9306|1  
RBC|Count, Erythrocyte;Counts, Erythrocyte;Erythrocyte Count;Erythrocyte  
Counts;erythrocyte count;Erythrocyte Number;Erythrocyte Numbers;RBC - Red blood  
cell count;RBC count;RBC count NOS;count rbc;count rbc;counting rbc;counts

rbc;rbc count;Red Blood Cell Count measurement;Red Cell  
 Count|C0014772|||C0014772|AOD;CHV;CSP;MSH;MTH;NCI;SNOMEDCT|1|0.0051|  
 RBC|Erythrocyte;Erythrocyte,  
 NOS;Erythrocytes;erythrocyte;erythrocytes;RBC;rbc|C0014772;C0014792|||C0014772;  
 C0014792|AOD;CHV;CSP;FMA;LCH;LNC;MSH;MTH;NCI;SNOMEDCT;UWDA|||  
 RBC|Erythrocyte (cell)|||C0014792|SNOMEDCT|||  
 RBC|RBC count NOS (procedure)|||C0014772|SNOMEDCT|||  
 RBC|Ranitidine bismuth citrate|C0139919|||1|0.0153|  
 RBC|Red blood cell (cell)|||C0014792|SNOMEDCT|||  
 RBC|Red blood cell count (procedure);Red blood cell count NOS  
 (procedure)|||C0014772|SNOMEDCT|||  
 RBC|Rotating Biological Contactor|||1|0.0058|  
 RBC|blood corpuscle|C0005773;C0014792|||C0014792|CHV|||  
 RBC|human erythrocytes|||1|0.0127|  
 RBC|resin-based composite|||1|0.0092|  
 RCA|Raji cell assay|C0201454|||1|  
 RCA|Ricinus Communis Agglutinin I|||1|0.0165|  
 RCA|Ricinus communis|C0007341|||1|0.0189|  
 RCA|Ricinus communis agglutinin|C0140570|||1|0.0979|  
 RCA|RubisCO activase|||1|0.0106|  
 RCA|complement activation|C0009528;C2984768|||1|0.0601|  
 RCA|radiographic contrast agent|C2917425|||1|  
 RCA|radionuclide cerebral angiogram|||1|  
 RCA|reactive cutaneous angioendotheliomatosis|||1|  
 RCA|red cell adherence|||1|  
 RCA|red cell agglutination|||1|  
 RCA|red cell aggregation|||1|0.0165|  
 RCA|red cell aplasia|C0281963|||1|  
 RCA|relative chemotactic activity|||1|  
 RCA|renal cell  
 carcinoma|C0007134;C2984311|||C0007134;C2984311|CHV;CSP;DXP;MSH;MTH;NCI;NDFRT;PD  
 Q;QMR;SNOMEDCT|||1|  
 RCA|replication-competent adenovirus|||1|0.0142|  
 RCA|retained cortical activity|||1|  
 RCA|retrochiasmatic area|C0262326|||1|0.0106|  
 RCA|right carotid artery|||1|  
 RCA|right coronary|||1|0.0165|  
 RCA|right coronary angiography|||1|  
 RCA|right coronary  
 artery|C1261316|1|1.000|C1261316|CHV;FMA;HCPCS;NCI;SNOMEDCT;UWDA|1|0.6969|1  
 RCA|rolling circle amplification|||1|0.0318|1  
 RCA|root cause analysis|C3179036|||C3179036|MSH|1|0.0094|1  
 RCA|rotational coronary atherectomy|C3161299|||1|  
 RDW|Erythrocyte Distribution Width Measurement;Erythrocyte distribution  
 width;Erythrocytes Distribution Width;RDW;RDW - Red blood cell distribution  
 width;RDW determination;Red cell distribution width determination;cell  
 distribution red width;cells distribution red width;red cell distribution  
 width;red cell width  
 distribution|C0427460|||C0427460|CHV;LNC;MTH;NCI;SNOMEDCT|1|1|  
 RDW|Red blood cell distribution width|||C0427460|SNOMEDCT|||  
 RDW|Red blood cell distribution width (& level)|||C0427460|SNOMEDCT|||  
 RDW|Red blood cell distribution width (& level)  
 (procedure)|||C0427460|SNOMEDCT|||  
 RDW|Red blood cell distribution width (observable  
 entity)|||C0427460|SNOMEDCT|||  
 RDW|Red cell distribution width determination  
 (procedure)|||C0427460|SNOMEDCT|||

RDW|red distribution width||1|1.000|||1  
ROS|2,4-Thiazolidinedione, 5-004-02-(((methyl-2-pyridinylamino)ethoxy)phenyl)methyl)-|||C0289313|MSH;NDFRT|||  
ROS|5-((4-(2-methyl-2-(pyridinylamino)ethoxy)phenyl)methyl)-2,4-thiazolidinedione-2-butenedioate|||C0289313|MSH;NDFRT|||  
ROS|Active Oxygen;Active oxygen;Oxygen, Active;active oxygen;Oxygen Radical;Oxygen Radicals;oxygen radical;oxygen radicals;Oxygen Species, Reactive;Reactive Oxygen Species;oxygen reactive species;reactive oxygen species;Pro Oxidants;Pro-Oxidants;Pro-oxidant;pro oxidant;pro-oxidant|C0162772|||C0162772|AOD;CHV;CSP;LCH;MSH;MTH;NCI;NDFRT|1|0.9195|1  
ROS|Avian UR2 Sarcoma Virus Oncogene Homolog 1;ONCOGENE ROS;Oncogene ROS;ROS1 Gene;ROS1 gene;c-ros oncogene 1, receptor tyrosine kinase;c-ros-1|C0812281|||C0812281|HUGO;MTH;NCI;OMIM|||  
ROS|MCF3;V-ROS AVIAN UR2 SARCOMA VIRUS ONCOGENE HOMOLOG 1|C0812281;C1709820|||C0812281|HUGO;OMIM|||  
ROS|ROS|C0162772;C0289313;C0489633;C0812281|||C0162772;C0289313;C0489633;C0812281|HUGO;NCI;OMIM;PDQ|||  
ROS|ROS1|C0216760;C0812281|||C0812281|HUGO;NCI;OMIM|||  
ROS|ROSIGLITAZONE;Rosiglitazone;rosiglitazone|C0289313|||C0289313|CHV;CSP;MSH;MTH;NCI;NDFRT;PDQ;RXNORM;SNOMEDCT;USPMG;VANDF|||  
ROS|Rat osteosarcoma|C1882806|||1|0.0032|  
ROS|Reactive Oxygen Species [Chemical/Ingredient]|||C0162772|NDFRT|||  
ROS|Review of Systems;Review of systems;review of systems;review system;review systems;system review;systems of review|C0488564;C0488565;C0489633|1|1|C0489633|CHV;LNC;NCI;SNOMEDCT|||1  
ROS|Review of systems (procedure)|C0489633|||C0489633|MTH;SNOMEDCT|||  
ROS|Rosiglitazone (product)|||C0289313|SNOMEDCT|||  
ROS|Rosiglitazone (substance)|||C0289313|SNOMEDCT|||  
ROS|V-ROS UR2 Sarcoma Virus Oncogene Homolog 1 (Avian) Gene|||C0812281|NCI|||  
ROS|oscillatory resistance|||1|0.001|  
ROS|reactive oxygen|||1|0.0039|  
ROS|reactive oxygen substances|||1|0.0008|  
ROS|respiratory resistance|||1|0.0012|  
ROS|rod outer segment;rod outer segments|C0035798|||1|0.0705|1  
ROS|rosiglitazone [Chemical/Ingredient]|||C0289313|NDFRT|||  
ROS|rosiglitazones|||C0289313|CHV|||  
ROS|rostral sulcus|||1|  
RPR|EXTL3 wt Allele;KIAA0519;RPR|C1705631|||C0201405;C1705631|LNC;MTH;NCI|||  
RPR|EXTR1|C1367595;C1705631|||C1705631|NCI|||  
RPR|Exostoses (Multiple)-Like 3 wt Allele|||C1705631|NCI|||  
RPR|REG|C1419333;C1705631|||C1705631|NCI|||  
RPR|RPR test;Rapid Plasma Reagin;rapid plasma reagin;Rapid Plasma Reagin Measurement;Rapid plasma reagin test;rapid plasma reagin test;rapid plasma reagin (rpr) test|C0201405|1|1|C0201405|CHV;MTH;NCI;SNOMEDCT|1|1|1  
RPR|Rapid plasma reagin test (procedure)|||C0201405|SNOMEDCT|||  
RPR|Reiter protein reagin|||1|  
RPR|rotational panoramic radiography|||1|  
RR|R-R interval|C0488420;C2041217|||1|0.0036|  
RR|Relative risk of death|||1|0.0009|  
RR|Resonance Raman|||1|0.0377|  
RR|Respiratory rates;respiratory rate|C0231832;C0489258|1|1|C0231832;C0489258|CHV;LNC;MSH;MTH;NCI;SNOMEDCT|1|0.0023|1  
RR|Riva-Rocci|||1|  
RR|Ross River|||1|0.0047|  
RR|Roundup Ready|||1|0.0016|  
RR|blood pressure|C0005823;C1271104;C1272641|||1|0.0016|

RR|cycle length|||||1|0.0018|  
RR|heart period|||||1|0.0014|  
RR|intervals|C1272706|||||1|0.0025|  
RR|patients with relapsing-remitting|||||1|0.005|  
RR|radial rate|||||1|  
RR|radiation reaction|||||1|  
RR|radiation response|||||1|  
RR|rapid radiometric|||||1|  
RR|rate ratio|||||1|0.0542|1|  
RR|reactive|C0205332|||||1|0.0018|  
RR|reading retarded|||||1|  
RR|recovery room|C0034871|||C0034871|CHV;MSH;SNOMEDCT|1|0.0036|1|  
RR|recurrence|C0034897;C1458156;C2825055|||||1|0.0016|  
RR|red reflex|C0278244|||||1|  
RR|reference range|C0034926|||C0034926|CHV;HL7V2.5;MSH;NCI|||  
RR|region|C0017446;C0205147|||||1|0.0016|  
RR|regular rate|||||1|  
RR|regular respiration|||||1|  
RR|relapsing remitting|||||1|0.0057|  
RR|relative recovery|||||1|0.0013|  
RR|relative response|||||1|0.0038|1|  
RR|relative risk|C0242492|||C0242492|AOD;CHV;MSH;NCI|1|0.7104|1|  
RR|renin release|||||1|0.0031|1|  
RR|resistant relapse|||||1|  
RR|respiration rate|C0231832|||C0231832|CHV;LNC;MSH|||  
RR|respiratory reserve|||||1|  
RR|response rate|C0237629|||C0237629|CHV;NCI|1|0.0298|1|  
RR|response regulator|||||1|0.0018|  
RR|retinal reflex|||||1|  
RR|reversal reaction|||||1|0.0027|  
RR|reverse redistribution|||||1|0.0038|  
RR|rheumatoid rosette|||||1|  
RR|ribonucleotide  
reductase|C0035547|||C0035547|CHV;CSP;MSH;MTH;NCI;NDFRT|1|0.025|  
RR|right rotation;rotation right|||||1|  
RR|righting reflex|C0234156|||C0234156|AOD;GO;MSH;SNOMEDCT|1|0.0025|  
RR|risk ratio|C0028873;C0242492|||C0028873;C0242492|CHV;MSH;NCI|1|0.0519|1|  
RR|road rash|||||1|  
RR|roentgenographic pelvimetry|||||1|  
RR|ruthenium red|C0035975|||C0035975|MSH;NDFRT|1|0.0323|1|  
RSV|Human Respiratory Syncytial Virus|C0035236;C0206545|||C0035236|NCI|||  
RSV|RSV|||C0035236;C0086943|CHV;CSP;MEDLINEPLUS;NCI;SNOMEDCT|||  
RSV|Respiratory Syncytial Virus;Respiratory Syncytial Viruses;Respiratory syncytial virus;Syncytial Virus, Respiratory;Syncytial Viruses, Respiratory;Virus, Respiratory Syncytial;Viruses, Respiratory Syncytial;respiratory syncytial virus;syncytial respiratory virus;respiratory syncytial virus (RSV);respiratory syncytial virus RSV;respiratory syncytial virus RS;  
respiratory syncytial virus RS  
virus|C0035236|1|1|C0035236|CHV;CSP;LNC;MSH;MTH;NCBI;NCI;SNOMEDCT|1|0.7779|1|  
RSV|Respiratory syncytial viral|||||1|0.0034|  
RSV|Respiratory syncytial virus (organism)|||C0035236|SNOMEDCT|||  
RSV|Rous Sarcoma Virus;Rous sarcoma virus;rous sarcoma virus;sarcoma virus, Rous;virus, Rous sarcoma;Rous sarcoma virus  
RSV|C0086943|||C0086943|AOD;CHV;CSP;MSH;MTH;NCBI;NCI;SNOMEDCT|1|0.2092|1|  
RSV|Rous sarcoma virus (organism)|||C0086943|SNOMEDCT|||  
RSV|regurgitant stroke volume|||||1|0.003|1|  
RSV|respiratory syncytial|||||1|0.0034|

RSV|right subclavian vein|C0489887|||||1  
RSV|saphenous vein|C0036186;C0392907|||||1|0.003|  
RT|(drug) RT|||1|0.002|||||  
RT|Cancer Radiotherapy;RT - Radiotherapy;Radiotherapeutics;Therapeutic radiology  
for cancer treatment;Therapeutic radiology  
procedure|C1522449|||C1522449|CCS;MTH;NCI;SNOMEDCT|||  
RT|Irradiate;Irradiated;irradiated|C1517600;C1522449;C1548980|||C1522449|NCI|||  
RT|Irradiation;irradiation|C1282930;C1522449|||C1522449|CHV;NCI;PDQ|1|0.0237|  
RT|LGMD2K|C1418752;C1836373|||C1418752|HUGO|||  
RT|POMT1;POMT1 gene;PROTEIN O-MANNOSYLTRANSFERASE 1;protein-O-  
mannosyltransferase 1|C1418752|||C1418752|HUGO;LNC;MTH;OMIM|||  
RT|RADIATION THERAPY;Radiation Therapy;Radiation therapy;Radiation therapy,  
NOS;Therapy, Radiation;radiation therapies;radiation therapy;radiations  
therapy;therapy radiation;therapy,  
radiation|C0034619;C1522449|1|0.672|C0034619;C1522449|AOD;CHV;CSP;DXP;MEDLINEPLU  
S;MSH;NCI;PDQ;SNOMEDCT|1|0.1781|1  
RT|RADIOTHER|||C0034619;C1522449|MSH|||  
RT|RNA-directed DNA polymerase activity|C1152411|||C1152411|GO;MTH|||  
RT|ROTATED ABDOMEN, DROSOPHILA, HOMOLOG OF|||C1418752|OMIM|||  
RT|RT|||C0034619;C1152411;C1418752;C1522449;C2826321;C2953923|FMA;GO;MSH;NCI;OM  
IM|||  
RT|Radiation;radiation|C0034519;C0560559;C0851346;C1522449;C1524020;C1524021|||C  
1522449|NCI|1|0.0168|  
RT|Radiation oncology AND/OR radiotherapy|||C1522449|SNOMEDCT|||  
RT|Radiation oncology AND/OR radiotherapy (procedure)|||C1522449|SNOMEDCT|||  
RT|Radiation therapy (procedure)|||C1522449|SNOMEDCT|||  
RT|Radiotherapies;Radiotherapy;Radiotherapy,  
NOS;radiotherapy|C0034619;C0243005;C1522449|||C0034619;C1522449|AOD;CCS;CHV;CSP;  
LCH;MEDLINEPLUS;MSH;NCI;PDQ;SNOMEDCT|1|0.3211|  
RT|Radiotherapy (regime/therapy)|||C1522449|SNOMEDCT|||  
RT|Refractory Thrombocytopenia|C2826321|||C2826321|MTH;NCI|||  
RT|Reporter's Test|||||1  
RT|Rostrotemporal auditory area|C2953923|||C2953923|FMA;MTH|||  
RT|Therapeutic radiology|C0243004;C0243005;C1522449|||C1522449|CCS|||  
RT|nucleus rotundus|||||1|0.0022|  
RT|rabbit trachea|||||1  
RT|radiation treatment|||||1|0.0016|  
RT|radiologic technology|C0039431|||||1  
RT|radiotelemetry|C0260285|||||1  
RT|radiotherapeutic|C0034619|||C0034619|MTH|||  
RT|radiotherapy alone|||||1|0.0058|  
RT|radium therapy|C0454073|||||1  
RT|rainbow trout|C0036108|||||1|0.0026|  
RT|random transfusion|||||1  
RT|raphe transection|||||1  
RT|rational therapy|||||1  
RT|reaction|C0443286;C1114821|||||1|0.002|  
RT|reaction time|C0034746|||||1|0.2407|1  
RT|reactive thrombocytosis|C0457506|||||1|0.0068|  
RT|reading task|||||1  
RT|reading test|||||1  
RT|reading time|||||1  
RT|real-time|C1550177|||||1|0.0024|  
RT|receptor transforming|||||1  
RT|reciprocal translocations|||||1|0.0022|  
RT|reciprocating tachycardia|C0242514|||||1|0.0014|1  
RT|recovery time|||||1



RV|rectovaginal|C0450213;C0545864|||||1  
RV|reference value|C0034926|||||1  
RV|regurgitant volume|C0946338|||||1  
RV|reinforcement value|||||1  
RV|renal vein|C0035092;C1278961|||||1|0.0039|1  
RV|reovirus|C0206596;C0999948;C1963012|||||1  
RV|reserve volume|||||1  
RV|respiratory volume|C0024129|||||1  
RV|retinal vasculitis|C0152026|||||1|0.0043|1  
RV|retrovaginal|||||1  
RV|retroversion|C0333055|||||1  
RV|retrovesical|||||1  
RV|retroviral vector|C1514926|||||1|0.0043|  
RV|return visit|||||1  
RV|rhabdovirus|C0035414;C1540830|||||1  
RV|rheumatoid vasculitis|C0240903|||||1|0.0074|1  
RV|right ventricle|C0225883;C1269891|1|1.000|||1|0.1863|1  
RV|right ventricular|||||1|0.5002|1  
RV|right ventricular free wall|||||1|0.0021|  
RV|rotavirus|C0035870;C0724688|||||1|0.0375|1  
RV|rubella vaccine|C0035923|||||1  
RV|rubella virus|C0035924|||||1|0.0443|1  
RVR|BD73;EAR-1r;Hs.37288;NR1D2;NR1D2 gene;NUCLEAR RECEPTOR SUBFAMILY 1, GROUP D, MEMBER 2;nuclear receptor subfamily 1, group D, member 2;RVR|C1417822|||C1417822|HUGO;MTH;OMIM|||  
RVR|HZF2|C1417822;C1421754|||C1417822|HUGO|||  
RVR|REV-ERBA-ALPHA-RELATED RECEPTOR|||C1417822|OMIM|||  
RVR|rapid ventricular response|C0748243|1|1.000|||1  
RVR|reduced vascular response|||||1  
RVR|reduced vestibular response|||||1  
RVR|relative vascular resistance|||||1  
RVR|renal vascular resistance|||||1|0.9306|1  
RVR|renal vein renin|||||1|0.0174|1  
RVR|renovascular resistance|||||1  
RVR|repetitive ventricular response|||||1|0.0304|1  
RVR|resistance to venous return|||||1|0.0217|1  
RVR|right ventricular rhythm|||||1  
RVSP|RVSP;RVSP (Right Ventricular Systolic Pressure)|C1979972|||C1979972|LNC;MTH|||  
RVSP|right ventricular systolic pressure|C0456181|1|1.000|||1|1|1  
SAB|Anesthesia, Spinal;Anesthesias, Spinal;Spinal Anesthesia;Spinal Anesthesias;Spinal anaesthesia;Spinal anaesthesia;spinal anaesthesia;spinal anaesthesia;Intradural block;Intrathecal block;Local anaesthetic intrathecal block;Local anesthetic intrathecal block;Spinal Block;Spinal block;spinal block;Spinal anaesthetic;Spinal anaesthetic NOS;Spinal anesthetic;Spinal anesthetic NOS;spinal anesthetic;Subarachnoid block;subarachnoid block|C0002928|||C0002928|AOD;CHV;CSP;LCH;MSH;MTH;NCI;SNOMEDCT|1|0.0946|1  
SAB|Local anaesthetic intrathecal block (procedure);Local anesthetic intrathecal block (procedure)|||C0002928|SNOMEDCT|||  
SAB|SAB;Sab|C0002928;C1420024|||C0002928;C1420024|HUGO;LNC;NCI;OMIM|||  
SAB|SH3 DOMAIN-BINDING PROTEIN 5;SH3 binding protein;SH3BP5;SH3BP5 gene|C1420024|||C1420024|HUGO;MTH;OMIM|||  
SAB|SH3-domain binding protein 5 (BTK-associated)|||C1420024|HUGO|||  
SAB|Spinal anesthesia (procedure)|||C0002928|SNOMEDCT|||  
SAB|Spinal anesthetic NOS (procedure)|||C0002928|SNOMEDCT|||  
SAB|Staphylococcus aureus bacteremia|C1142423|||||1|0.2838|1  
SAB|sequential androgen blockade|||||1

SAB|serum albumin|C0036773;C0728877|||||1  
SAB|short-acting block|||||1  
SAB|side air bags|||||1  
SAB|significant asymptomatic bacteriuria|||||1  
SAB|sinuatrial block|||||1  
SAB|solid-adherent bacteria|||||1|0.0676|  
SAB|spontaneous  
abortion|C0000786|1|1.000|C0000786|AOD;CCS;CHV;COSTAR;CSP;ICD9CM;MEDLINEPLUS;MSH  
;MTH;NCI;NDFRT;SNOMEDCT|1|0.4189|1  
SAB|spontaneous alternation behavior|||||1|0.1351|  
SAB|streptavidin-biotin|||||1  
SAB|subacromial  
bursa|C0224792;C1269087|||C0224792;C1269087|CHV;FMA;SNOMEDCT;UWDA|||  
SAB|subarachnoid bleed|||||1  
SA|37LRP|||C1539696|HUGO|||  
SA|67LR|||C1539696|OMIM|||  
SA|ACSM3;ACSM3 gene;ACYL-CoA SYNTHETASE MEDIUM-CHAIN FAMILY MEMBER 3;acyl-CoA  
synthetase medium-chain family member 3;SAH|C1825840|||C1825840|HUGO;MTH;OMIM|||  
SA|LAMBR|C1539696;C1705231|||C1539696|OMIM|||  
SA|LAMININ RECEPTOR 1;LAMININ RECEPTOR, 67-KD;RIBOSOMAL PROTEIN SA;ribosomal  
protein SA|C1367780;C1539696|||C1539696|HUGO;OMIM|||  
SA|LAMR1|C1367780;C1539696;C1705231|||C1539696|OMIM|||  
SA|LRP|C2987171|||C1539696|HUGO|||  
SA|NATO code for arsine|||||1  
SA|RPSA;RPSA Gene;RPSA gene;Ribosomal Protein SA  
Gene|C1539696|||C1539696|HUGO;MTH;NCI;OMIM|||  
SA|SA|C0036243;C1539696;C1825840|||C0036243;C1539696;C1825840|HUGO;NCI;OMIM|||  
SA|SA, RAT, HOMOLOG OF|||C1825840|OMIM|||  
SA|SAU;SAUDI ARABIA;Saudi Arabia;arabia saudi;saudi  
arabia|C0036243|||C0036243|AOD;CHV;CSP;LCH;MSH;MTH;NCI;SNOMEDCT|||  
SA|Saudi Arabia (geographic location)|||C0036243|SNOMEDCT|||  
SA|Schizophrenics Anonymous|||||1  
SA|Sexaholics Anonymous|||||1  
SA|Situation Awareness|||||1|0.0024|  
SA|Skeletal age;skeletal age|||||1|0.0049|1  
SA|Sleep apnoea;sleep apnea|C0037315|||||1|0.0225|1  
SA|Sodium salicylate|C0037549|||||1|0.0103|  
SA|South Africa|C0037712|||||1|0.0064|  
SA|South African|C0238605|||||1|0.0078|  
SA|South Australia|C0037715|||||1|0.0093|  
SA|Spinal anesthesia;spinal anaesthesia;spinal  
anesthesia|C0002928|||||1|0.0166|1  
SA|Spontaneous abortion|C0000786|||||1|0.0122|  
SA|Staphylococcus aureus|C0038172;C1318973|||||1|0.0548|1  
SA|Staphylococcus aureus Cowan I|||||1|0.0054|  
SA|Status asthmaticus;status asthmaticus|C0038218|||||1|0.0064|1  
SA|Stokes-Adams|||||1  
SA|according to art|||||1  
SA|antigens|C0003320|||||1|0.0049|  
SA|cocaine self-administration|||||1|0.0049|  
SA|heroin self-administration|||||1|0.0039|  
SA|isolated rabbit sino-atrial|||||1|0.002|  
SA|isolated rabbit sinoatrial|||||1|0.0039|  
SA|p40|||C1539696|HUGO|||  
SA|sacroanterior|||||1

SA|salicylic  
acid|C0036079|||C0036079|AOD;CHV;LCH;MSH;MTH;MTHSPL;NCI;NDFRT;PDQ;RXNORM;SNOMEDC  
T;VANDF|1|0.2851|  
SA|saline|C0036082|||||1|0.0073|1  
SA|salt added|||||||1  
SA|salvage angioplasty|||||||1  
SA|sarcoidosis|C0036202;C2697310|||||1|0.0093|  
SA|sarcoma|C1261473|||||||1  
SA|satellite association|||||||1|0.0034|  
SA|saturation|C0522534|1|0.008|||||  
SA|second antibody|||||||1  
SA|secondary amenorrhea|C0232940|||||||1  
SA|secondary anemia|C0340952|||||||1  
SA|secondary arrest|||||||1  
SA|self-agglutinating|||||||1  
SA|self-analysis|C0683472|||||||1  
SA|semen analysis|C0202533|||||||1  
SA|sensitizing antibody|||||||1  
SA|sensory awareness|||||||1  
SA|separation anxiety|C0003477;C1527281;C1879354|||||1|0.0044|  
SA|septal apical|||||||1  
SA|septic arthritis|C0003874;C1692886|||||1|0.0078|  
SA|serrated adenoma|C1266025|||||1|0.0044|  
SA|serratus anterior|||||1|0.0059|1  
SA|serum albumin|C0036773;C0728877|||||1|0.0328|1  
SA|serum aldolase|||||||1  
SA|serum aldosterone|C0428395|||||1|0.0039|  
SA|severe asthma|C0581126|||||||1  
SA|short acting|||||||1  
SA|short-axis|C0522488|||||1|0.0059|  
SA|sialic  
acid|C0037024;C0067762|||C0037024;C0067762|AOD;CHV;MSH;NCI;NDFRT;SNOMEDCT|1|0.05  
53|1  
SA|sialoadenectomy|C0193311|||||||1  
SA|siblings apart|||||||1  
SA|sideroblastic anaemia|C0002896|||||1|0.0034|  
SA|simian adenovirus|C0001491|||||||1  
SA|simulated annealing|||||||1|0.0244|  
SA|sinuatrial|||1|0.176|||||1  
SA|sinus arrest|C0178428|1|0.004|||||1  
SA|sinus arrhythmia|C0003813;C1959628|||||1|0.0034|1  
SA|slide agglutination|||||1|0.0039|  
SA|slightly active|||||||1  
SA|slow acetylator|C1827377|||||||1  
SA|slow acting/sustained action|||1|0.746|||||  
SA|slowly adapting|||||||1|0.0372|  
SA|social acquiescence|||||||1  
SA|social age|||||||1  
SA|sodium L-ascorbate|||||||1|0.0068|  
SA|sodium alginate|C0142791|||||1|0.0044|  
SA|sodium arsenite|C0074719|||||1|0.0068|  
SA|soluble in alkaline|||||||1  
SA|spatial average|||||||1  
SA|specific activity|||||||1|0.0455|1  
SA|spectral analysis|||||||1|0.0073|  
SA|spectrum analysis|C0037812|||||||1  
SA|sperm abnormality|||||||1

SA|sperm agglutinin|||||1  
 SA|spherical aberration|||||1|0.0039|  
 SA|sphinganine|C0074987|||||1|0.0112|  
 SA|spiking activity|||||1  
 SA|splenic artery|C0037996;C1280127|||||1|0.0064|1  
 SA|spontaneous activity|||||1|0.0093|  
 SA|spontaneous alternation|||||1|0.0054|  
 SA|stable angina|C0340288;C0699826|||||1|0.0259|  
 SA|standard accuracy|||||1  
 SA|state anxiety|C0700613;C1279420|||||1|0.0049|  
 SA|stearylamine|C0075209|||C0075209|MSH|1|0.0171|  
 SA|stimulus artifact|||||1  
 SA|streptavidin|C0075278|||||1|0.0298|  
 SA|streptococcal antigen|||||1|0.0103|  
 SA|stretch-activated|||||1|0.0176|  
 SA|subarachnoid|C1515008|||||1  
 SA|subcarinal angle|||||1  
 SA|subclavian artery|C0038530;C1280737|||||1|0.0078|  
 SA|substance abuse|C0740858|||||1|0.0117|1  
 SA|succinic anhydride|C0075430|||||1|0.0049|  
 SA|succinylacetone|C0075455|||||1|0.0196|  
 SA|suicide alert|||||1  
 SA|suicide attempt|C0038663;C1547270|||||1  
 SA|sulcus angle|||||1|0.0044|  
 SA|sulfanilamide|C0038702;C1161332|||||1|0.0044|  
 SA|sulfonamide|C0038760|||||1|0.0098|  
 SA|surface antigen|C0003339|||||1  
 SA|surface area|||||1|0.0333|1  
 SA|surgery alone|||||1|0.0049|  
 SA|sustained action|||||1  
 SA|sympathetic activity|||||1  
 SA|sympathoadrenal|||||1|0.0103|  
 SA|systemic artery|C0933549|||||1  
 SA|systemic aspergillosis|C0343856|||||1  
 SBE|BACT ENDOCARDITIDES SUBACUTE;BACT ENDOCARDITIS SUBACUTE;ENDOCARDITIDES  
 SUBACUTE BACT;ENDOCARDITIS SUBACUTE BACT;SUBACUTE BACT ENDOCARDITIDES;SUBACUTE  
 BACT ENDOCARDITIS|||C0014122|MSH|||  
 SBE|BACTERIAL ENDOCARDITIS (SUBACUTE);Bacterial Endocarditides,  
 Subacute;Bacterial Endocarditis, Subacute;ENDOCARDITIS, BACTERIAL,  
 SUBACUTE;Endocarditides, Subacute Bacterial;Endocarditis, Subacute  
 Bacterial;Subacute Bacterial Endocarditides;Subacute Bacterial  
 Endocarditis;Subacute bacterial endocarditis;Subacute endocarditis,  
 bacterial;bacterial endocarditis subacute;subacute bacterial  
 endocarditis;Endocarditis Lenta;Endocarditis lenta;Endocarditis,  
 lenta;endocarditis lenta;SBE;sbe;SBE - Subacute bacterial endocarditis;Subacute  
 endocarditis, lenta;endocarditis infectious;infectious  
 endocarditis|C0014122|1|1|C0014122|CHV;COSTAR;DXP;MSH;MTH;MTHICD9;NCI;NDFRT;SNOM  
 EDCT|1|0.4048|1  
 SBE|Endocarditis, Subacute Bacterial [Disease/Finding]|||C0014122|NDFRT|||  
 SBE|SMAD-binding element|||||1|0.1905|  
 SBE|Subacute bacterial endocarditis (disorder)|||C0014122|SNOMEDCT|||  
 SBE|ie|C0014122;C0022067;C1881173|||C0014122|CHV|||  
 SBE|saturated base excess|||||1  
 SBE|self-breast examination|C0085105|||||1  
 SBE|short below-elbow|||||1  
 SBE|short-segment Barrett esophagus|||||1  
 SBE|shortness of breath on exertion|||C0231807|CHV|||1

SBE|single base extension|||||1|0.2857|  
 SBE|small-bowel enteroscopy|||||1|  
 SBE|sporadic bovine encephalitis;sporadic bovine  
 encephalomyelitis|C0276112|||C0276112|SNOMEDCT|||  
 SBE|starch branching enzyme|C0000052;C1152072|||||1|0.119|  
 SBP|ABP|C1412100|||C1705296|NCI|||  
 SBP|SBP;sbp|C1306620;C1705296|||C1306620;C1705296|CHV;NCI|||  
 SBP|SHBG|||C1705296|NCI|||  
 SBP|SHBG wt Allele;Sex Hormone-Binding Globulin wt  
 Allele|C1705296|||C1705296|MTH;NCI|||  
 SBP|Systolic blood pressure measurement|C1306620|||C1306620|MTH|||  
 SBP|blood pressure systolic;systolic blood  
 pressure|C0488055;C0871470;C1306620|1|0.166|C0488055;C0871470;C1306620|CHV;LNC;N  
 CI;SNOMEDCT|1|0.6653|1  
 SBP|school breakfast program|||||1|  
 SBP|scleral buckling procedure|C0036411|||||1|  
 SBP|selenium-binding protein|C1527491|||||1|  
 SBP|serotonin binding proteins;serotonin-binding protein|C0074385|||||1|0.0014|1  
 SBP|sex steroid-binding protein|C0036883|||||1|0.0237|  
 SBP|small-bowel phytobezoar|||||1|  
 SBP|solitary bone plasmacytoma|||||1|  
 SBP|soybean peroxidase|||||1|0.0028|  
 SBP|spontaneous bacterial  
 peritonitis|C0275551|1|0.834|C0275551|ICD9CM;SNOMEDCT|1|0.0515|1  
 SBP|spontaneous biliary perforation|||||1|  
 SBP|steroid-binding plasma protein|||||1|  
 SBP|sulfobromophthalein|C0038753|||C0038753|CHV;CSP;MSH;MTH;NCI;NDFRT;RXNORM;SNO  
 MEDCT|||1  
 SBP|systemic blood pressure|C1272641|||C1272641|CHV;SNOMEDCT|||1  
 SBP|systolic|C0039155|||||1|0.1471|  
 SBP|systolic BP|C0871470|||||1|0.1083|  
 SIADH|ADH INAPPROPRIATE;INAPPROPRIATE ADH;Inappropriate ADH;inappropriate  
 adh;ADH INAPPROPRIATE SECRETION;adh inappropriate secretion;inappropriate ADH  
 secretion;inappropriate adh secretion;ADH Syndrome, Inappropriate;Inappropriate  
 ADH Syndrome;SYNDROME INAPPROPRIATE ADH;Syndrome, Inappropriate ADH;adh  
 inappropriate syndrome;adh inappropriate syndromes;ANTIDIURETIC HORMONE  
 INAPPROPRIATE SECRETION SYNDROME <SIADH>;ANTIDIURETIC HORMONE INAPPROPRIATE  
 SECRETION SYNDROME SIADH;SIADH - Syndrome of inappropriate secretion of  
 antidiuretic hormone;Antidiuretic Hormone, Inappropriate Secretion;INAPPROPRIATE  
 SECRETION OF ANTIDIURETIC HORMONE;Inappropriate Antidiuretic Hormone Secretion  
 Syndrome;Syndrome of Inappropriate Antidiuretic Hormone Secretion;Syndrome of  
 inappropriate secretion of antidiuretic hormone;syndrome of inappropriate  
 antidiuretic hormone secretion;syndrome of inappropriate secretion of  
 antidiuretic hormone;Inappropriate Vasopressin Secretion Syndrome;Syndrome of  
 inappropriate vasopressin secretion;SCHWARTZ-BARTTER SYNDROME;Schwartz Bartter  
 Syndrome;Schwartz-Bartter Syndrome;Schwartz-Bartter syndrome;Syndrome, Schwartz-  
 Bartter;SIAD - Syndrome of inappropriate  
 antidiuresis;SIADH;siadh;siadhs;SYNDROME OF INAPPROPRIATE ANTIDIURETIC  
 HORMONE;syndrome of inappropriate antidiuretic hormone;Syndrome of inappropriate  
 ADH production;Syndrome of inappropriate antidiuresis;Syndrome of inappropriate  
 antidiuretic hormone (SIADH);Syndrome of inappropriate secretion of ADH;syndrome  
 of inappropriate secretion of  
 ADH|C0021141|||C0021141|AOD;CHV;COSTAR;CST;DXP;MSH;MTHICD9;NCI;NDFRT;OMIM;QMR;RA  
 M;SNOMEDCT|1|1|1|  
 SIADH|ANTIDIURETIC HORMONE INAPPROPRIATE SECRET|||C0021141|MSH|||  
 SIADH|INAPPROPRIATE VASOPRESSIN SECRET SYNDROME|||C0021141|MSH|||  
 SIADH|Inappropriate ADH Syndrome [Disease/Finding]|||C0021141|NDFRT|||

SIADH|SYNDROME INAPPROPRIATE ADH SIADH SECRET||||C0021141|MSH|||  
SIADH|Schwarz-Bartter syndrome||||C0021141|SNOMEDCT|||  
SIADH|Syndrome of Inappropriate ADH (SIADH) Secretion||||C0021141|MSH;NDFRT|||  
SIADH|Syndrome of inappropriate secretion of antidiuretic hormone  
(disorder)|||C0021141|SNOMEDCT|||  
SIADH|Syndrome of inappropriate vasopressin secretion  
(disorder)|||C0021141|SNOMEDCT|||  
SIADH|syndrome of inappropriate diuretic hormone secretion||1|1.000|||||  
SI|(drug) SI||1|0.002|||||  
SI|95 kDa Melanocyte-Specific Secreted Glycoprotein;ME20 antigen, human;ME20  
protein, human;ME20-M;ME20-M/ME20-S;ME20M;Melanocyte Protein MEL17;Melanocyte  
Protein PMEL17;Melanocyte protein mel 17, human;PMEL17 protein, human;Pmel 17  
protein, human;SILV protein, human;Silver  
Homolog|C0257766|||C0257766|MSH;MTH;NCI|||  
SI|D12S53E|C1420066;C1705301|||C1420066;C1705301|HUGO;NCI|||  
SI|GP100;gp100|||C0257766;C1420066;C1705301|HUGO;NCI;OMIM|||  
SI|International System of Units;international system of units;Modern Metric  
System;Systeme International d'Unites|C0021791|||C0021791|CHV;MSH;MTH;NCI|||1  
SI|ME20;PMEL17;Pmel17|C0257766;C1420066;C1705301|||C0257766;C1420066;C1705301|HU  
GO;NCI;OMIM|||  
SI|ME20M/ME20S|||C0257766|NCI|||  
SI|MELANOCYTE PROTEIN 17;PMEL;PMEL gene;PREMELANOSOMAL PROTEIN;SILV  
Gene;premelanosome protein|C1420066|||C1420066|HUGO;MTH;NCI;OMIM|||  
SI|Melanocyte Lineage-Specific Antigen gp100;Melanocyte Protein Pmel 17;Silver  
Locus Protein Homolog|C0257766;C1608320|||C0257766|NCI|||  
SI|Melanoma-Associated ME20 Antigen|||C0257766|NCI|||  
SI|Oligosaccharide alpha-1,6-glucosidase|||C1420044|HUGO|||  
SI|SI;Si|||C0021791;C0037107;C0037334;C0257766;C1420044;C1420066;C1705301|HUGO;  
LNC;NCI;OMIM|||  
SI|SI Unit;SI Units;Unit, SI;Units, SI;si unit;si units;units  
si|C0021791;C1705302|||C0021791|CHV;MSH|||  
SI|SI gene|C1420044|||C1420044|HUGO;MTH|||  
SI|SIL|||C0257766;C1705301|NCI|||  
SI|SILICON;Silicon;Silicon, NOS;silicon;Si - Silicon;Si  
element|C0037107|||C0037107|AOD;CHV;CSP;LCH;LNC;MSH;MTH;MTHSPL;NCI;NDFRT;RXNORM;  
SNOMEDCT|1|0.0392|1  
SI|SILV|C0257766;C1420066|||C0257766;C1420066|NCI;OMIM|||  
SI|SILV wt Allele|C1705301|||C1705301|MTH;NCI|||  
SI|SILVER, MOUSE, HOMOLOG OF|||C1420066|OMIM|||  
SI|SLOVENIA;Slovenia;slovenia;SVN|C0037334|||C0037334|AOD;CHV;CSP;MSH;MTH;NCI;SN  
OMEDCT|||  
SI|SUCRASE-ISOMALTASE;sucrase-  
isomaltase|C0028941;C1420044|||C0028941;C1420044|CHV;OMIM;SNOMEDCT|1|0.049|1  
SI|Salience Inventory|||||||1  
SI|Serum iron;serum iron|C1318312|||C1318312|CHV|1|0.0187|1  
SI|Silicon (substance)|||C0037107|SNOMEDCT|||  
SI|Silicon [Chemical/Ingredient]|||C0037107|NDFRT|||  
SI|Silver Homolog (Mouse) Gene|||C1420066|NCI|||  
SI|Silver Homolog (Mouse) wt Allele|||C1705301|NCI|||  
SI|Silver Like|||C0257766|NCI|||  
SI|Simulated ischemia|||||1|0.0089|  
SI|Singh Index|||||||1  
SI|Slovenia (geographic location)|||C0037334|SNOMEDCT|||  
SI|Sputum induction|||||||1|0.0047|  
SI|Structured Interview;structured interview|C0681913|||C0681913|AOD|1|0.0221|  
SI|Systematic Inquiry|||||||1  
SI|first|C0205435;C1279901|||||1|0.006|

SI|first somatic sensory area|||||1|0.0047|  
SI|first somatosensory area|||||1|0.0034|  
SI|infection|C0021311|||||1|0.0043|  
SI|injury|C0175677|||||1|0.0038|  
SI|insulin sensitivity|C0920563|||C0920563|CHV;CSP;MSH|1|0.0826|  
SI|interval|C1272706;C1552654;C1552713|||||1|0.0038|  
SI|most anterior point on lower contour of sella turcica|||||||1|  
SI|primary|C0205225;C0439631|||||1|0.02|  
SI|primary somatosensory|||||||1|0.0379|  
SI|primary somatosensory area|||||||1|0.0038|  
SI|primary somatosensory cortex|||||||1|0.1069|  
SI|sacroiliac|C0555898|1|0.980|C0555898|CHV;HL7V2.5;LNC;SNOMEDCT|1|0.0387|1  
SI|sacroiliitis|C0574960|||C0574960|AIR;AOD;CHV;COSTAR;MSH;NDFRT;OMIM;SNOMEDCT|1  
|0.006|  
SI|sagittal index|||||||1|  
SI|saline infusion|||||||1|  
SI|saline injection|||||||1|  
SI|saturation index|||||||1|  
SI|sector iridotomy|||||||1|  
SI|self-incompatibility|C1654759|||||1|0.0353|  
SI|self-incompatible|||||||1|0.0055|  
SI|self-inflicted|||||||1|  
SI|sensitive index|||||||1|  
SI|sensory  
integration|C0679019;C0695560|||C0679019;C0695560|AOD;CHV;MTH|1|0.0034|1  
SI|sequential injection|||||||1|0.0038|  
SI|serious illness|||||||1|  
SI|serum insulin|C0428357;C1261415|||||||1|  
SI|service index|||||||1|  
SI|severity index|||||||1|  
SI|sex inventory|||||||1|  
SI|sexual intercourse|C0009253|||||||1|  
SI|short interfering|||||||1|0.0043|  
SI|signal intensity|C0871362|||C0871362|CHV|1|0.1294|1  
SI|silent ischemia|||||||1|0.0038|  
SI|silent myocardial ischemia|C0340291|||C0340291|SNOMEDCT|1|0.0043|  
SI|silica|C0037098|||C0037098|CHV;LCH;LNC;MSH;NCI;NDFRT;SNOMEDCT|1|0.0077|  
SI|silicone|C0037114|||C0037114|CHV;LNC;MSH;NCI;NDFRT;SNOMEDCT;VANDF|||  
SI|silver homolog (mouse) protein, human|||C0257766|MSH|||  
SI|single injection|||||||1|  
SI|sinus|C0016169;C0030471;C1305231|||||||1|  
SI|sinus irregularity|||||||1|  
SI|situs  
inversus|C0037221|||C0037221|CHV;COSTAR;ICD9CM;MSH;MTH;NCI;NDFRT;OMIM;SNOMEDCT|1  
|0.0047|  
SI|small interfering|||||||1|0.0051|  
SI|small intestinal|C0021852|||C0021852|SNOMEDCT|1|0.0081|  
SI|small  
intestine|C0021852;C1268998|||C0021852;C0341268;C1268998|AOD;CHV;CSP;CST;FMA;MSH  
;NCI;SNOMEDCT;UWDA|1|0.0226|1  
SI|small-intestine channel|||||||1|  
SI|smoke inhalation|C0037367|||C0037367|CHV;COSTAR;CSP;SNOMEDCT|||  
SI|social interaction|C0037420|||C0037420|AOD;CHV;MSH;MTH;SNOMEDCT|1|0.0149|  
SI|social introversion|||||||1|  
SI|social isolation|C0037421|||||1|0.003|  
SI|soluble insulin|C0021641|||||||1|  
SI|somatosensory area I|||||||1|0.0021|

SI|special intervention|||||1|0.0132|1  
SI|specific insulin|||||1|0.0026|  
SI|spectroscopic imaging|||||1|0.017|  
SI|spinal cord isolation|||||1|0.0047|  
SI|splenic irradiation|||||1|0.0064|  
SI|stimulation index;stimulation indices|||||1|0.1123|1  
SI|stoichiometry of inhibition|||||1|0.0034|  
SI|stress  
incontinence|C0042025;C2712321|||C0042025;C2712321|CHV;COSTAR;MEDLINEPLUS;SNOMED  
CT|1|0.006|1  
SI|strict isolation|||||1|  
SI|stroke index|C0456712|||C0456712|SNOMEDCT|||1  
SI|structure of intellect|||||1|  
SI|substantia innominata|C0038589|||C0038589|AOD;CSP;FMA;MSH;MTH|1|0.0247|  
SI|sucrase-isomaltase (alpha-glucosidase)|||C1420044|HUGO|||  
SI|suicidal ideation|C0424000|1|0.016|||1|0.0047|1  
SI|sulfated insulin|||||1|  
SI|superior-inferior|||||1|  
SI|suppression index|||||1|  
SI|syncytia-inducing;syncytium-inducing|||||1|0.0826|1  
SI|syncytium-inhibiting|||||1|  
SI|systolic index|||||1|  
SLE|DISSEMINATED LUPUS ERYTHEMATOSUS;Disseminated lupus erythematosus;LUPUS  
ERYTHEMATOSUS, DISSEMINATED;disseminated lupus erythematosus;LE SYNDROME;le  
syndrome;les syndrome;LUPUS ERYTHEMATOSIS (NOS);lupus erythematosus;LUPUS  
SYNDROME;SYNDROME LUPUS;lupus syndrome;lupus syndromes;syndrome lupus;Lupus  
Erythematosus Disseminatus;lupus erythematosus disseminatus;SLE;SYSTEMIC LUPUS  
ERYTHEMATOSIS;erythematosus lupus systemic;systemic lupus  
erythematosus;sles|C0024141|||C0014060;C0024141;C0037063|AOD;CHV;COSTAR;CSP;CST;  
DXP;MEDLINEPLUS;MSH;MTH;MTHICD9;NCI;NDFRT;OMIM;SNOMEDCT|1|0.0071|  
SLE|ENCEPH SAINT LOUIS;SAINT LOUIS ENCEPH|||C0014060|MSH|||  
SLE|ENCEPH ST LOUIS;ST LOUIS ENCEPH|||C0014060|MSH|||  
SLE|ENCEPH VIRAL ST LOUIS;ST LOUIS VIRAL ENCEPH|||C0014060|MSH|||  
SLE|ENCEPHALITIS C;ENCEPHALITIS, SAINT LOUIS;Encephalitis, Saint Louis;Saint  
Louis Encephalitis;Saint Louis encephalitis;saint louis  
encephalitis;Encephalitis, St. Louis;St Louis encephalitis;St. Louis  
Encephalitis;St. Louis encephalitis;st louis encephalitis;st. louis  
encephalitis;Lethargic Encephalitis, Type C;Type C Lethargic Encephalitis;Type C  
lethargic encephalitis;Neuroinvasive Saint Louis encephalitis virus  
infection;SLE - Saint Louis encephalitis;St-Louis viral disease;St. Louis viral  
disease|C0014060|||C0014060|CHV;CSP;DXP;ICD9CM;LCH;MSH;MTH;NDFRT;SNOMEDCT|||1  
SLE|Encephalitis, St. Louis [Disease/Finding]|||C0014060|NDFRT|||  
SLE|Encephalitis, Viral, St. Louis;St. Louis Viral  
Encephalitis|||C0014060|MSH;NDFRT|||  
SLE|LETHARGIC ENCEPH TYPE C;TYPE C LETHARGIC ENCEPH|||C0014060|MSH|||  
SLE|LUPUS ERYTHEMATOSIS DISSEMINATED|||C0024141|CST|||  
SLE|LUPUS ERYTHEMATOSUS SYSTEMIC;LUPUS ERYTHEMATOSUS, SYSTEMIC;LUPUS,  
ERYTHEMATOSUS, SYSTEMIC;Lupus Erythematosus, Systemic;Lupus erythematosus,  
Systemic;SYSTEMIC LUPUS ERYTHEMATOSUS;Systemic Lupus Erythematosus;Systemic  
lupus erythematosus;Systemic lupus erythematosus NOS;erythematosu lupus  
systemic;systemic lupus erythematosus;SLE - Lupus Erythematosus, Systemic;SLE -  
Systemic lupus erythematosus;systemic lupus erythematosus  
(SLE)|C0024141;C2984317|1|1|C0024141;C2984317|AIR;AOD;CHV;COSTAR;CSP;CST;DXP;ICD  
9CM;LCH;MEDLINEPLUS;MSH;MTH;NCI;NDFRT;OMIM;QMR;SNOMEDCT|1|0.9618|1  
SLE|Louis encephalitis|||||1|0.0165|  
SLE|Louis encephalitis virus|||||1|0.0017|

SLE|Lupus;lupus|C0024131;C0024138;C0024141;C0409974|||C0024141|CHV;CSP;MEDLINEPL  
US|||  
SLE|Lupus Erythematosus, Systemic [Disease/Finding]|||C0024141|NDFRT|||  
SLE|Neuroinvasive Saint Louis encephalitis virus infection  
(disorder)|||C0014060|SNOMEDCT|||  
SLE|Neuroinvasive St. Louis encephalitis virus infection|||C0014060|SNOMEDCT|||  
SLE|Neuroinvasive St. Louis encephalitis virus infection  
(disorder)|||C0014060|SNOMEDCT|||  
SLE|Republic of Sierra Leone;SIERRA LEONE;Sierra Leone;leone sierra;sierra  
leone|C0037063|||C0037063|AOD;CHV;DXP;LCH;MSH;MTH;NCI;SNOMEDCT|||  
SLE|SL|||C0037063|NCI|||  
SLE|SYNDROME DISSEMINATED LUPUS ERYTHEMATOSIS|||C0024141|CST|||  
SLE|Sierra Leone (geographic location)|||C0037063|SNOMEDCT|||  
SLE|Slit lamp examination;slit-lamp examination|C0419360|||1|0.0017|1  
SLE|St. Louis encephalitis (disorder)|||C0014060|SNOMEDCT|||  
SLE|St. Louis encephalitis virus infection|||C0014060|SNOMEDCT|||  
SLE|St. Louis encephalitis virus infection (disorder)|||C0014060|SNOMEDCT|||  
SLE|St. Louis encephalitis virus neuroinvasive disease|||C0014060|SNOMEDCT|||  
SLE|Syst lupus erythematosus|||C0024141|ICD9CM|||  
SLE|Systemic lupus erythematosus (disorder);Systemic lupus erythematosus NOS  
(disorder)|||C0024141|SNOMEDCT|||  
SLE|stressful life events|||1|0.0008|  
SLE|systemic LE|||1|0.0023|  
SLE|systemic lupus|||1|0.0014|  
SLE|systemic lupus erythematoses|||1|0.0029|  
SLE|systemic lupus erythematosus|||1|0.0029|  
SLE|systemic lupus erythmatosus|||1|0.0009|  
SL|ADMIN SUBLINGUAL;SUBLINGUAL ADMIN|||C0001565|MSH|||  
SL|Administration, Sublingual;Administrations, Sublingual;Sublingual  
Administration;Sublingual Administrations;sublingual  
administration;Administration, Sublingual Drug;Administrations, Sublingual  
Drug;Drug Administration, Sublingual;Drug Administrations, Sublingual;Sublingual  
Drug Administration;Sublingual Drug Administrations;Sublingual Route of  
Administration;Sublingual Route of Drug Administration;Sublingual  
use;SublingualRoute|C0001565|||C0001565|AOD;HL7V3.0;MSH;MTH;NCI;SNOMEDCT|||  
SL|Borrelia burgdorferi sensu lato|||1|0.0263|  
SL|DRUG ADMIN SUBLINGUAL;SUBLINGUAL DRUG ADMIN|||C0001565|MSH|||  
SL|Republic of Sierra Leone;SIERRA LEONE;Sierra Leone;leone sierra;sierra  
leone|C0037063|||C0037063|AOD;CHV;DXP;LCH;MSH;MTH;NCI;SNOMEDCT|||  
SL|SL|||C0001565;C0037063;C1704626|NCI|||  
SL|SLE|C0024141|||C0037063|NCI|||  
SL|SUBLINGUAL;Sublingual;sublingual|C0001565;C0558302|1|1|C0001565;C0558302|CHV;  
HL7V2.5;NCI;SNOMEDCT|1|0.0409|1  
SL|Schwalbe line|C0929602|||1|  
SL|Sentinel lymphadenectomy;sentinel lymphadenectomy|||1|0.0073|1  
SL|Short latency|||1|0.0117|  
SL|Sibley-Lehninger|||1|  
SL|Sierra Leone (geographic location)|||C0037063|SNOMEDCT|||  
SL|Sleep Polysomnography Data;Sleep Polysomnography  
Domain|C1704626|||C1704626|MTH;NCI|||  
SL|Smyth line|||1|0.0234|  
SL|Spin lock;spin-lock|||1|0.0088|1  
SL|Steel|C0038239|||1|  
SL|Sublingual route|C0001565;C0521136|||C0001565|SNOMEDCT|||  
SL|Sublingual route (qualifier value)|||C0001565|SNOMEDCT|||  
SL|Sublingually;sublingually|||C0001565|SNOMEDCT|||1  
SL|Suspensory Ligament|||1|0.0161|

SL|cardiac sarcolemma|||||1|0.019|  
SL|cardiac sarcolemmal|||||1|0.0277|  
SL|db sensation level|||||1|0.0131|  
SL|layer|C0934502;C1522408;C1561599|||||1|0.0204|  
SL|lymphocytes|C0024264;C0200635|||||1|0.0161|  
SL|saline lock|C0179694|||C0179694|CHV|||1|  
SL|salt loser|||||1|  
SL|sarcolemma|C0036208|||C0036208|AOD;CSP;FMA;GO;LCH;MSH;MTH;NCI;SNOMEDCT;UWDA|||1|  
SL|sarcomere length|||||1|0.1153|  
SL|satellite-like|||||1|  
SL|scapholunate|||||1|0.0292|1|  
SL|sclerosing leukoencephalopathy|||||1|  
SL|sea level|||||1|0.2|  
SL|secondary leukemia|C0856053|||C0856053|CHV|||1|  
SL|segment length|||||1|  
SL|sensation level|||||1|  
SL|sensory latency|||||1|  
SL|septal leaflet|||||1|  
SL|serious list|||||1|  
SL|serotonin level|||||1|  
SL|serum lipid|C0428462|||||1|  
SL|sesquiterpene lactone|C2985517|||C2985517|NCI|1|0.0292|  
SL|sham laparotomy|||||1|0.0088|  
SL|short leg|C0426901|||C0426901|CHV;SNOMEDCT|||1|  
SL|sidelying|C0444379|||||1|  
SL|signal level|||||1|  
SL|sleep latency|||||1|0.0161|  
SL|sleeve lobectomy|C2986519|||C2986519|NCI|||1|  
SL|slice|C1519355|||||1|  
SL|slight|C2937276;C2945599|||||1|  
SL|slit lamp;slit-lamp|C0183355;C0419360|||C0183355;C0419360|CHV;NCI;SNOMEDCT|||1|  
SL|slow|C0439834|||||1|  
SL|slyke|||||1|  
SL|small leukocyte|||||1|  
SL|small lymphocyte|C0229616|||||1|  
SL|small lymphocytic lymphoma|C0023434;C0855095|||C0023434;C0855095|CHV;MSH;MTH;NCI;PDQ|||1|  
SL|smear layer|C0085070|||C0085070|CHV;MSH;NDFRT|||1|  
SL|soda lime|C0074716|||||1|  
SL|sodium lactate|C0142874;C1176295|||C0142874;C1176295|CHV;MSH;MTH;MTHSPL;NCI;NDFRT;RXNORM;SNOMEDCT;USPMG;VANDF|1|0.0088|1|  
SL|soleus|C0242694;C1305356|||C0242694;C1305356|CHV;FMA;NCI;SNOMEDCT;UWDA|1|0.0146|  
SL|solidified liquid|||||1|  
SL|sonoluminescence|||||1|0.019|  
SL|sound level|C0428754|||C0428754|CHV;SNOMEDCT|||1|  
SL|soybean lecithin|C1617265|||C1617265|NCI;RXNORM|||1|  
SL|sphingolipid|C0037900|||C0037900|CHV;CSP;NCI;SNOMEDCT|||1|  
SL|spinal length|||||1|  
SL|spiral ligament|C0229477|||C0229477|MSH|1|0.019|  
SL|spironolactone|C0037982|||C0037982|AOD;CHV;CSP;LCH;LNC;MSH;MTH;MTHSPL;NCI;NDFRT;PDQ;RXNORM;SNOMEDCT;USPMG;VANDF|1|0.0234|  
SL|spleen|C0037993;C1278932|||C0037993;C1278932|AOD;CHV;CSP;FMA;HL7V2.5;LCH;LNC;MSH;MTH;NCI;OMIM;SNOMEDCT;UWDA|||1|

SL|spliced leader|C0600446|||C0600446|MSH|1|0.1533|  
SL|spotting lethal|||1|0.0131|  
SL|staging laparoscopy|C0460043|||C0460043|SNOMEDCT|||1  
SL|staging laparotomy|C0843591|||C0843591|CHV|||  
SL|standard laparoscopy|||1|  
SL|stem-loop|||1|0.0234|  
SL|step length|C0427126|||C0427126|SNOMEDCT|||  
SL|stereolithographic|||1|0.0131|  
SL|stereolithography|||1|  
SL|sterically stabilized liposomes|||1|0.0088|  
SL|stratum lucidum|C0221922|||C0221922|AOD;NCI;SNOMEDCT|||  
SL|streptolysin|C0038419|||C0038419|CHV;CSP;LCH;LNC;MSH;NDFRT|||  
SL|stride length|||1|0.035|  
SL|stromelysin|C0164371|||C0164371;C1150206|CHV;CSP;GO;MSH;NDFRT|||  
SL|structured lipids|||1|0.0146|  
SL|supraglottic laryngectomy|C0189240|||C0189240|CHV;NCI;SNOMEDCT|||  
SL|surface Laplacian|||1|0.0131|  
SL|surrogate light|||1|0.0117|  
SL|surrogate light chain|C0253781|||C0253781|MSH;NDFRT|||  
SMA|Atrophy, Spinal Muscular;MUSCULAR ATROPHY, SPINAL;Muscular Atrophy,  
Spinal;Spinal Muscular Atrophy;Spinal muscular atrophy;Spinal muscular atrophy  
NOS;Spinal muscular atrophy, NOS;atrophies muscular spinal;atrophy muscular  
spinal;atrophy spinal muscular;muscular atrophy spinal;muscular spinal  
atrophy;spinal muscular atrophy;SMA - Spinal muscular atrophy;atrophy muscular  
sma spinal;SPINAL MUSCLE ATROPHY;muscle spinal atrophy;spinal muscle  
atrophy;Spinal muscular atrophy, unspecified;Unspecified spinal muscular  
atrophy;spinal  
amyotrophy|C0026847|1|0.112|C0026847|CHV;DXP;ICD9CM;MEDLINEPLUS;MSH;MTH;NCI;NDFR  
T;SNOMEDCT|1|0.2825|1  
SMA|Muscular Atrophy, Spinal [Disease/Finding]|||C0026847|NDFRT|||  
SMA|SMA;Sma|C0026847;C1367790|||C0026847;C1367790|MEDLINEPLUS;NCI|||  
SMA|SNRPF;Sm-F;Small Nuclear Ribonucleoprotein Polypeptide  
F|C1367790;C1420293|||C1367790|MSH;MTH;NCI|||  
SMA|Sm Protein F;snRNP-F|C1367790|||C1367790|NCI|||  
SMA|SmF|||C1367790|NCI|||  
SMA|Small Nuclear Ribonucleoprotein Associated Protein F;Small Nuclear  
Ribonucleoprotein-Associated Protein F|||C1367790|MSH|||  
SMA|Smooth muscle alpha-actin|||1|0.0085|  
SMA|Snow Mountain agent|||1|0.008|  
SMA|Spinal muscl atrophy NOS|||C0026847|ICD9CM|||  
SMA|Spinal muscular atrophy (disorder);Spinal muscular atrophy NOS  
(disorder)|||C0026847|SNOMEDCT|||  
SMA|Unspecified spinal muscular atrophy (disorder)|||C0026847|SNOMEDCT|||  
SMA|muscle actin|||1|0.0873|  
SMA|schedule of maximal allowance|||1|  
SMA|sequential multiple autoanalysis|||1|  
SMA|sequential multiple autoanalyzer||1|0.168|||1|  
SMA|serum muramidase activity|||1|  
SMA|shape memory alloy;shape-memory alloy|||1|0.0038|1  
SMA|simultaneous multiple autoanalysis|||1|  
SMA|simultaneous multiple autoanalyzer|||1|  
SMA|small mesenteric arteries|||1|0.0042|  
SMA|small muscle atrophy|||1|  
SMA|smallpox vaccine, not otherwise specified|C0037355|||1|  
SMA|smooth muscle|C1267092|||1|0.009|  
SMA|smooth muscle actin|C1825843|1|0.004|C1825843|OMIM|||1



SR|sarcoplasmic reticular|||||1|0.0097|  
SR|sarcoplasmic  
reticulum|C0036226|||C0036226|CHV;CSP;FMA;GO;LCH;MSH;NCI;SNOMEDCT;UWDA|1|0.6843|  
1  
SR|sarcoplasmic reticulum membranes|||||1|0.0012|  
SR|sarcoplasmic reticulum vesicles|||||1|0.0019|  
SR|saturation recovery|||||1|0.0029|1  
SR|scanning radiometer|||||1|  
SR|scavenger receptor;scavenger  
receptors|C0074129|||C0074129|CHV;CSP;MSH;MTH;NDFRT|1|0.0101|  
SR|schizophrenic reaction|C0151898|||||1|  
SR|screen|C0220908;C0430054;C1305399;C1705053|||||1|  
SR|secretin  
receptor|C0074254;C1335806|||C0074254;C1335806|HUGO;MSH;MTH;NCI;OMIM|||  
SR|secretion rate|||||1|  
SR|sedimentation rate|C0200704;C1176468|||C0200704;C1176468|CHV;NCI;SNOMEDCT|||1|  
SR|see report|||||1|  
SR|seizure resistant;seizure-resistant|||||1|0.0066|1  
SR|self-recording|||||1|  
SR|self-reinforced|||||1|0.0025|  
SR|sensitivity response|||||1|  
SR|sensitization response|||||1|  
SR|sensory rhodopsin|||||1|0.0017|  
SR|sentence repetition|||||1|  
SR|sepiapterin  
reductase|C0074350;C1420371|||C0074350;C1420371|MSH;MTH;OMIM;SNOMEDCT|1|0.0027|  
SR|serine-arginine|||||1|0.0054|  
SR|serine/arginine-rich|||||1|0.0076|  
SR|seroreversion|||||1|  
SR|service record|||||1|  
SR|sex ratio|C0036893|||C0036893|CHV;LCH;MSH|1|0.0025|1  
SR|shift reagent|||||1|0.0014|  
SR|short hair|C2750590|||||1|  
SR|side rails|||||1|  
SR|sigma reaction|||||1|  
SR|silicone rubber|C0037110|||C0037110|CHV;CSP;LCH;MSH;NDFRT|1|0.0041|1  
SR|sinus rhythm|C0232201|||C0232201|CHV;MTH;SNOMEDCT|1|0.0532|1  
SR|skin resistance|C0871375|||C0871375|CHV|1|0.0017|1  
SR|sleep and rest|||||1|  
SR|slew rate|||||1|  
SR|slow release;slow-release|||||1|0.0206|1  
SR|smooth-rough|||||1|  
SR|social recreation|||||1|  
SR|soluble repository|||||1|  
SR|somatostatin receptor|C0074830|||C0074830|CHV;MSH;MTH;NCI;NDFRT|||  
SR|spatial resolution|||||1|  
SR|specific release|||||1|  
SR|specific resistance|||||1|  
SR|specific response|||||1|  
SR|speech reception|||||1|  
SR|spontaneous rate|||||1|0.0074|  
SR|spontaneous remission|C0035053|||||1|0.0012|1  
SR|spontaneous respiration|C0412771|||||1|0.0014|  
SR|stabilizing reversal|||||1|  
SR|stage of resistance|||||1|  
SR|standard risk|||||1|0.0066|  
SR|stapedial reflex;stapedius reflex|C0034934|||C0034934|CHV|1|0.0033|

SR|steradian|C1705832|||||1  
SR|steroid receptor|C0034840|||C0034840|CHV;MSH;NDFRT;SNOMEDCT|||  
SR|steroid resistance|||||1  
SR|steroid-resistant|||||1|0.006|  
SR|stimulation ratio|||||1  
SR|stimulus response|C0542478|||||1  
SR|storage phosphor radiography|||||1|0.001|  
SR|strain rate|||||1|0.0068|  
SR|stratum radiatum|||||1|0.0058|  
SR|stress related|||||1  
SR|stress relaxation|||||1  
SR|stretch receptor|C0034841|||C0034841|CSP;MSH;SNOMEDCT|||  
SR|stretch reflex|C0034942|||||1|0.0014|1  
SR|structured reporting|||||1  
SR|sulfonamide-resistant|||||1  
SR|superior  
rectus|C0224128;C0582818|||C0224128;C0582818|CHV;FMA;SNOMEDCT;UWDA|1|0.0039|1  
SR|survival rate|C0038954|||C0038954|CHV;MSH;NCI|||  
SR|sustained responders|||||1|0.0031|  
SR|sustained response|||||1|0.0089|1  
SR|suture removal|C0184936|||||1  
SR|synaptic ribbon;synaptic ribbons|C1179874|||C1179874|FMA;GO;UWDA|1|0.0039|  
SR|synchronization ratio|||||1  
SR|synchrotron radiation|C0599746|||C0599746|CSP|1|0.0066|  
SR|synuclein, gamma (breast cancer-specific protein 1)|||C1335851|HUGO|||  
SR|systemic reaction|C1710276|||C1710276|NCI|1|0.0043|1  
SR|systemic resistance|||||1  
SR|systems research|||||1  
SR|systems review|||||1  
SS|5' splice site|C0887917|||||1|0.0032|  
SS|AFND|C0085077;C1863616|||C0085077|OMIM|||  
SS|Acute Febrile Neutrophilic Dermatitis;Acute febrile neutrophilic  
dermatosis;Dermatitis, Neutrophilic, Febrile, Acute;NEUTROPHILIC DERMATOSIS,  
ACUTE FEBRILE;Neutrophilic Dermatitis, Acute Febrile;Febrile neutrophilic  
dermatosis;febrile neutrophilic dermatosis;SWEET SYNDROME;SWEET'S SYNDROME;Sweet  
Syndrome;Sweet's Syndrome;Sweet's syndrome;Sweets Syndrome;Syndrome,  
Sweet;Syndrome, Sweet's;sweet syndrome;sweet's syndrome;sweets syndrome;Sweet's  
disease;sweet's  
disease|C0085077|||C0085077|CHV;COSTAR;DXP;MSH;MTH;NCI;NDFRT;OMIM;SNOMEDCT|||  
SS|Acute febrile neutrophilic dermatosis (disorder)|||C0085077|SNOMEDCT|||  
SS|BLOOD GROUP--Ss LOCUS;CD235b;GYPB;GYPB  
gene|C1415374|||C1415374|HUGO;MTH;OMIM|||  
SS|Dahl salt-sensitive|||||1|0.0088|  
SS|GCFX;PHOG;SHORT STATURE HOMEBOX;short stature homeobox;SHOX;SHOX Gene;SHOX  
gene;SHOXY;Short Stature Homeobox  
Gene|C1420041|||C1420041|HUGO;LNC;MTH;NCI;OMIM|||  
SS|GLYCOPHORIN B|C0017957;C1415374|||C1415374|OMIM|||  
SS|GOMM-BUTTON DISEASE|C0085077;C2931897|||C0085077|OMIM|||  
SS|GPB|C1415192;C1415374|||C1415374|HUGO;OMIM|||  
SS|Malignant synovioma;Synovioma, malignant;SARCOMA, SYNOVIAL;Sarcoma,  
Synovial;Sarcomas, Synovial;Synovial Sarcoma;Synovial Sarcomas;Synovial  
sarcoma;Synovial sarcoma, NOS;sarcoma synovial;synovial  
sarcoma;Synovioma;Synovioma,  
NOS;Synoviomias;synovioma|C0039101|||C0039101|CHV;LCH;MSH;MTH;NCI;NDFRT;OMIM;SNOM  
EDCT|1|0.0277|1  
SS|PSEUDOAUTOSOMAL HOMEBOX-CONTAINING OSTEOGENIC GENE|||C1420041|OMIM|||  
SS|SHORT STATURE HOMEBOX, Y-LINKED|||C1420041|OMIM|||

SS|SICCA;SICCA SYNDROME;SYNDROME SICCA;Sicca Syndrome;Sicca syndrome;Syndrome,  
Sicca;sicca  
syndrome;xerodermosteosis|C0086981|||C0086981|CHV;CSP;CST;DXP;ICD9CM;MSH;MTH;NCI  
;OMIM;SNOMEDCT|||  
SS|SS;Ss;ss|||C0039101;C0085077;C0086981;C1415374;C1420041;C1552161|CHV;DXP;HL7  
V3.0;HUGO;NCI;OMIM|||  
SS|Salmonella-Shigella|||||1|0.004|1  
SS|Sarcoma, Synovial [Disease/Finding]|||C0039101|NDFRT|||  
SS|Schizophrenia Subscale|||||1  
SS|Seizure-sensitive;seizure sensitive|||||1|0.0128|1  
SS|Septic shock;septic  
shock|C0036983|||C0036983|CHV;COSTAR;CSP;DXP;ICD9CM;MEDLINEPLUS;MSH;MTH;NCI;NDFR  
T;SNOMEDCT|1|0.0072|1  
SS|Sicca syndrome (disorder)|||C0086981|SNOMEDCT|||  
SS|Social Security|C0037435|||||1  
SS|Supernumerary mandibular right first primary molar|C1552161|||C1552161|MTH|||  
SS|Sweet Syndrome [Disease/Finding]|||C0085077|NDFRT|||  
SS|Synovial sarcoma (disorder)|||C0039101|SNOMEDCT|||  
SS|Synovial sarcoma (morphologic abnormality)|||C0039101|SNOMEDCT|||  
SS|Systolic shortening|||||1|0.004|  
SS|[M]Synovial sarcoma NOS|||C0039101|SNOMEDCT|||  
SS|[M]Synovioma NOS|||C0039101|SNOMEDCT|||  
SS|glands from patients with Sjogren's syndrome|||||1|0.002|  
SS|glycophorin B (MNS blood group)|||C1415374|HUGO|||  
SS|half|C2825407|||||1  
SS|homozygous|C0019904|||||1|0.0072|  
SS|homozygous sickle cell|||||1|0.0494|  
SS|sacral sulcus|C1562319|||||1  
SS|sacrosciatic|||||1  
SS|sagittal sinus|C0447120|||C0447120|CHV;NCI;SNOMEDCT|||  
SS|saikosaponin|C0073959|||C0073959|MSH|||  
SS|salbutamol sulfate|C0543495|||C0543495|CHV;PDQ;SNOMEDCT|1|0.0024|  
SS|saline;saline  
solution|C0036082|||C0036082|CHV;MSH;MTH;MTHFDA;RXNORM|1|0.0112|1  
SS|saline soak|||||1  
SS|saliva sample|||||1  
SS|saliva substitute|C0036088|||||1  
SS|salt sensitive|||||1|0.0056|  
SS|salt sensitivity|||||1  
SS|salt substitute|C0784217|||||1  
SS|saturated solution|||||1  
SS|schizophrenia spectrum|||||1  
SS|scleral spur|C0229116;C1281274|||||1  
SS|scleroderma systematica|||||1|0.0052|  
SS|segmental shortening|||||1|0.0032|  
SS|self-stimulation|C0036602|||||1|0.0309|  
SS|sensation seeking|C0871336|||C0871336|CHV|||  
SS|sensitivity|C0036667;C0312418;C0427965;C1511883;C1522640;C2346484;C2349185|||  
||1|0.004|  
SS|sensu stricto|||||1|0.0068|  
SS|sepsis syndrome|C0242966|||C0242966|CHV;MSH;NDFRT;SNOMEDCT|||  
SS|serotonin  
syndrome|C0024586;C0699828|||C0024586;C0699828|CHV;MSH;MTH;NDFRT;SNOMEDCT|||1  
SS|serum|C0229671;C1546774;C1550100|||||1|0.0036|  
SS|serum sickness|C0036830;C1963234|||||1  
SS|serum soluble|||||1  
SS|severity score|C0457451|||C0457451|CHV;SNOMEDCT|||

SS|sewage sludge|||||1|0.0032|  
SS|shear stress|C1171318|||C1171318|CHV;CSP|1|0.012|  
SS|short  
stature|C0013336;C0349588|||C0013336;C0349588;C2919142|CHV;CST;ICD9CM;MTH;NCI;OM  
IM;SNOMEDCT|1|0.0048|1  
SS|short stay|C1698490|||||1  
SS|siblings|C0037047|||||1  
SS|sickle cell|C0221283|||C0221283|CHV;NCI;SNOMEDCT|||1  
SS|sickle cell anaemia;sickle cell  
anemia|C0002895;C2700574|||C0002895;C2700574|AOD;CCS;CHV;COSTAR;CSP;DXP;LNC;MEDL  
INEPLUS;MSH;NCI;NDFRT;OMIM;QMR;SNOMEDCT|1|0.0474|  
SS|sickle cell disease|C0002895|||||1|0.0072|  
SS|sickle cell genotype SS||1|0.008|||||  
SS|side-to-side|C0516750|||||1  
SS|sidestream smoke|||||1|0.0064|  
SS|sigmoid sinus|C0226865;C1281038|||C0226865;C1281038|CHV;FMA;SNOMEDCT;UWDA|||  
SS|signs and symptoms|C0037088|||||1  
SS|simple spike|||||1|0.008|  
SS|single session|||||1  
SS|single stranded;single-strand;single-stranded|C1979975|||||1|0.2124|1  
SS|single strength||1|0.878|||||1  
SS|skull series|||||1  
SS|slice select|||||1  
SS|sliding scale|C2937251|||||1  
SS|slip sent|||||1  
SS|slow sleep;slow wave sleep;slow-wave sleep;synchronized  
sleep|C0234451|||C0234451|AOD;CHV;CSP;SNOMEDCT|1|0.0052|1  
SS|small|C0700321|||||1|0.004|  
SS|small subunit|||||1|0.006|  
SS|smoking status|C1519386|||||1  
SS|soapsuds|||||1  
SS|social services|C0037440;C0037441|||||1  
SS|social  
support|C0037438;C0748877;C1540833|||C0037438;C0748877;C1540833|AOD;CHV;MSH;MTH;  
NCI;SNOMEDCT|1|0.0048|  
SS|sodium saccharin|C0917900|||C0917900|CHV|||  
SS|sodium  
salicylate|C0037549|||C0037549|AOD;CHV;LNC;MSH;NCI;NDFRT;PDQ;RXNORM;SNOMEDCT;VAN  
DF|1|0.0108|  
SS|sodium  
selenite|C0142923|||C0142923|CHV;MSH;MTHSPL;NCI;NDFRT;RXNORM;SNOMEDCT;VANDF|1|0.  
0076|  
SS|somatostatin|C0037659;C1881011|||C0037659;C0373723;C1335871;C1881011;C2697526  
|AOD;CHV;CSP;FMA;HUGO;LCH;LNC;MSH;MTH;NCI;NDFRT;OMIM;RXNORM;SNOMEDCT|1|0.23|  
SS|sorbitan sesquioleate|C0074916|||||1  
SS|sparingly soluble|||||1  
SS|special service|||||1  
SS|spermatocytic seminoma|C0334517|||C0334517|NCI;SNOMEDCT|1|0.0036|  
SS|sport sheath|||||1  
SS|squalene  
synthase|C0597790;C1414563|||C0597790;C1414563|HUGO;MSH;NDFRT;OMIM|1|0.0044|  
SS|stable sarcoidosis|||||1  
SS|staccato syndrome|||||1  
SS|stainless steel|C0038126|||C0038126|CHV;MSH;NDFRT;SNOMEDCT|1|0.0349|1  
SS|standard score|C0871421|||||1  
SS|starch synthase|C0038180|||||1|0.0044|  
SS|statistically significant|C0237881|||||1

SS|steady state;steady-state|C0678587|||C0678587|AOD;CHV|1|0.0261|1  
SS|stenosis|C0009814;C0678234;C0947637;C1261287;C2632116|||1|0.0044|  
SS|sterile solution|||1  
SS|steroid sensitivity|||1  
SS|steroid sulfurylation|||1  
SS|steroid-sensitive|||1|0.0064|  
SS|straight  
sinus|C0226862;C1281036|||C0226862;C1281036|FMA;SNOMEDCT;UWDA|1|0.0032|  
SS|stress-susceptible|||1|0.0036|  
SS|stromal sarcoma|C0206630;C1370723|||1  
SS|subaortic stenosis|C0340375|||1  
SS|subjects|||1|0.0422|1  
SS|subsarcolemmal|||1|0.0096|  
SS|subscapularis|C0224233;C0584884|||1  
SS|subsegmental|||1  
SS|subsequent sibling|||1  
SS|subspinale|||1  
SS|substernal|||1  
SS|sucrose synthase|C0075485|||C0075485|MSH;MTH;SNOMEDCT|1|0.0072|  
SS|suction socket|||1  
SS|sulindac sulfide|C0075615|||C0075615|MSH;NCI|||  
SS|sum squares|||1  
SS|supersaturated|||1  
SS|supersaturation|||1|0.004|  
SS|support and stimulation|||1  
SS|supraspinatus|C0224229;C0584869|||C0224229;C0584869|CHV;FMA;NCI;SNOMEDCT;UWDA  
|1|0.0044|  
SS|susceptible|C0231204;C2827758|||1  
SS|suspended solids|||1|0.0225|  
SS|suture system|||1  
SS|symmetrical strength|||1  
SS|sympathetic stimulation|||1|0.004|  
SS|syngosubarachnoid shunting|||1  
SS|system|C0449913;C1553451;C1704459|||1|0.0076|  
SS|systemic scleroderma;systemic  
sclerosis|C0036421|||C0036421|CHV;CSP;ICD9CM;LCH;MEDLINEPLUS;MSH;MTH;NCI;NDFRT;S  
NOMEDCT|1|0.0357|1  
SS|systolic segment shortening|||1|0.002|  
SSRI|SSRI;SSRIs;Selective Serotonin Reuptake Inhibitor;Selective Serotonin  
Reuptake Inhibitors;Selective serotonin reuptake inhibitors;selective serotonin  
reuptake inhibitor;Selective Serotonin Reuptake Inhibitor (SSRI);Selective  
Serotonin Reuptake Inhibitors  
(SSRIs)|C0360105;C2911696|1|1|C0360105;C2911696|MEDLINEPLUS;MSH;NCI;NDFRT;USPMG|  
1|1|1  
SSRI|SSRI - Selective serotonin re-uptake inhibitor;Selective serotonin re-  
uptake inhibitor|C0360105|||C0360105|MTH;SNOMEDCT|||  
SSRI|Selective serotonin re-uptake inhibitor (product)|||C0360105|SNOMEDCT|||  
SSRI|Selective serotonin re-uptake inhibitor (substance)|||C0360105|SNOMEDCT|||  
SSRI|Serotonin Reuptake Inhibitor;Serotonin Reuptake Inhibitor  
(SSRI)|C0162758;C2911696|||C2911696|NDFRT|||  
SSRI|Serotonin Reuptake Inhibitor [EPC]|C2911696|||C2911696|MTH;NDFRT|||  
STD|DEHYDROEPIANDROSTERONE SULFOTRANSFERASE;DHEA  
SULFOTRANSFERASE|C0057278;C1420519|||C1420519|OMIM|||  
STD|DHEA-ST;DHEAST;SULFOTRANSFERASE FAMILY 2A, DEHYDROEPIANDROSTERONE-  
PREFERRING, MEMBER 1;SULFOTRANSFERASE, DEHYDROEPIANDROSTERONE-  
PREFERRING;SULT2A1;SULT2A1 gene|C1420519|||C1420519|HUGO;MTH;OMIM|||

STD|DISEASE (VD), VENEREAL;VD - Venereal disease;VD, VENEREAL DISEASE;VENEREAL DISEASE (VD);Disease with a predominantly sexual mode of transmission;Disease, Sexually Transmitted;Diseases, Sexually Transmitted;SEXUALLY TRANSMITTED DISEASE NOS;Sexually Transmitted Disease;Sexually Transmitted Diseases;Sexually transmitted disease;Sexually transmitted disease, NOS;Sexually transmitted diseases;disease sexually transmit;disease sexually transmitted;diseases sexually transmitted;sexually transmitted disease;sexually transmitted diseases;Disease, Venereal;Diseases, Venereal;VENEREAL DISEASE;Venereal Disease;Venereal Diseases;Venereal disease;Venereal disease NOS;Venereal disease, NOS;Venereal diseases;disease venereal;diseases venereal;venereal disease;venereal diseases;STD;STDs;STD - Sexually transmitted disease;sexually transmitted disease (STD);sexually transmitted diseases (STDs);Sexually Transmitted Disorder;Sexually Transmitted Infection;Sexually transmitted infections;Sexually transmissible disease;Statutory venereal disease;Venereal disease, unspecified|C0036916|1|1|C0036916;C1420519;C1421567;C1705831;C1867549|AOD;CHV;CO STAR;CSP;DXP;HUGO;ICD9CM;LCH;LNC;MEDLINEPLUS;MSH;MTH;NCI;NDFRT;OMIM;SNOMEDCT|1|0.9483|1

STD|PROTEIN TYROSINE KINASE ZAP70;ZETA-CHAIN-ASSOCIATED PROTEIN KINASE|C1421567;C1527940|||C1421567|OMIM|||

STD|SELECTIVE T-CELL DEFECT;selective T-cell defect;SELECTIVE T-CELL DEFECT GENE|C1867549|||C1867549|MTH;OMIM|||1

STD|SEX TRANSM DIS|||C0036916|MSH|||

STD|SRK|||C1421567;C1705831|NCI;OMIM|||

STD|ST-segment depression|C0520887|||1|0.01|1

STD|SYK-RELATED TYROSINE KINASE|C0246976;C1421567;C1527940|||C1421567|OMIM|||

STD|Saturation transfer difference|||1|0.0111|

STD|Sexually Transmitted Diseases [Disease/Finding]|||C0036916|NDFRT|||

STD|Sexually transmitted infectious disease;Sexually transmitted infectious disease, NOS|||C0036916|SNOMEDCT|||

STD|Sexually transmitted infectious disease (disorder)|||C0036916|SNOMEDCT|||

STD|VD;vds|C0036916;C0042682|||C0036916|CHV;NCI|||

STD|VENEREAL DIS|||C0036916|MSH|||

STD|Venereal disease (disorder);Venereal disease NOS (disorder)|||C0036916|SNOMEDCT|||

STD|ZAP-70;ZAP70|C1421567;C1527940;C1705831|||C1421567;C1705831|HUGO;LNC;NCI;OMIM|||

STD|ZAP-70 Gene;ZAP70 wt Allele|C1705831|||C1705831|MTH;NCI|||

STD|ZAP70 Gene;ZAP70 gene|C1421567;C1705831|||C1421567|HUGO;MTH;NCI|||

STD|ZETA-ASSOCIATED PROTEIN, 70-KD|||C1421567|OMIM|||

STD|Zeta-Chain (TCR) Associated Protein Kinase 70kDa Gene|||C1421567|NCI|||

STD|Zeta-Chain (TCR) Associated Protein Kinase 70kDa wt Allele|||C1705831|NCI|||

STD|[X]Infections with a predominantly sexual mode of transmission|||C0036916|SNOMEDCT|||

STD|[X]Infections with a predominantly sexual mode of transmission (disorder)|||C0036916|SNOMEDCT|||

STD|[X]Unspecified sexually transmitted disease|||C0036916|SNOMEDCT|||

STD|[X]Unspecified sexually transmitted disease (disorder)|||C0036916|SNOMEDCT|||

STD|disease sexualli transmit|||C0036916|CHV|||

STD|disease sexually transmited;diseases sexually transmited|||C0036916|CHV|||

STD|saturated|C0522534;C1705188|||1|

STD|seminiferous tubular diameter|||1|0.0037|

STD|short-term depression|||1|0.0074|

STD|short-term disability|||1|

STD|skin test done|||1|

STD|skin test dose|||||||1  
STD|skin-to-tumor distance|||||||1  
STD|sodium tetradecyl sulfate|C0037556|||||||1  
STD|source-to-tray distance|||||||1  
STD|standard|C1442989;C1548173;C2828392|||||1|0.0195|1  
STD|standard density|||||||1  
STD|standard test dose|||||||1  
STD|standardized|||||||1  
STD|sulfotransferase family, cytosolic, 2A, dehydroepiandrosterone (DHEA)-  
preferring, member 1|||||C1420519|HUGO|||  
STD|zeta-chain (TCR) associated protein kinase 70kDa|||||C1421567|HUGO|||  
STT|ST-T wave||1|1.000|||  
STT|Schirmer tear test|C0200152;C0493032|||||1|0.0929|  
STT|scaphoid, trapezium, trapezoid|||||||1  
STT|scaphotrapeziotrapezoid|||||||1  
STT|scaphotrapezoid-trapezoid|||||||1  
STT|sensitization test|||||||1  
STT|serial thrombin time|||||||1  
STT|short-term tests|||||1|0.0328|  
STT|skin temperature test|||||||1  
STT|soft tissue tumor;soft tissue tumors|C0037579|||||1|0.082|1  
STT|spinothalamic|||||1|0.1038|  
STT|spinothalamic tract|C0037953;C1283383|||||1|0.6885|1  
STT|standard triple therapy|||||||1  
STT|subtotal thyroidectomy|C0193790|||||||1  
STT|superficial tibiotalar|||||||1  
SVC|SVC;svc;SVC - Slow vital capacity;slow vital capacity (SVC);Slow vital  
capacity;slow vital capacity|C0231957|1|0.016|C0231957|CHV;SNOMEDCT|1|0.0364|1  
SVC|Slow vital capacity (observable entity)|||||C0231957|SNOMEDCT|||  
SVC|saphenous vein cutdown|||||||1  
SVC|segmental venous capacitance|||||||1  
SVC|selective vascular clamping|||||||1  
SVC|selective venous catheterization|||||||1  
SVC|spring viremia of carp|C0276361|||C0276361|SNOMEDCT|||  
SVC|subclavian vein catheter|||||||1  
SVC|subclavian vein catheterization|C1319106|||C1319106|CHV|||1  
SVC|subclavian vein compression|||||||1  
SVC|superior|C1282910|||||1|0.0192|  
SVC|superior vena  
cava|C0042459;C1269023|1|0.982|C0042459;C1269023|CHV;FMA;MSH;NCI;SNOMEDCT;UWDA|1  
|0.8927|1  
SVC|superior vena caval|C0521359|||||1|0.0517|  
SVC|suprahepatic vena cava|||||||1  
SVC|supraventricular crest|C0225884;C1305151|||||||1  
SVG|SVG;Scalable Vector Graphics|C2827658|||C2827658|NCI|||  
SVG|saphenous vein graft|C0729538|1|1.000|||1|0.9167|1  
SVG|sauvagine|C0074087|||||1|0.0833|  
SVG|scatter and veiling glare|||||||1  
SVG|seminal vesiculography|C0203133|||||||1  
SVT|STYCAR Vision Test|C0430941|||||||1  
SVT|SUPRAVENTRICULAR TACHYCARDIA;Supraventricular Tachycardia;Supraventricular  
Tachycardias;Supraventricular tachycardia;Supraventricular tachycardia  
NOS;Supraventricular tachycardia, NOS;TACHYCARDIA SUPRAVENTRICULAR;TACHYCARDIA,  
SUPRAVENTRICULAR;Tachycardia, Supraventricular;Tachycardias,  
Supraventricular;supraventricular tachycardia;supraventricular  
tachycardias;tachycardia

supraventricular|C0039240;C1963244|||C0039240|CHV;COSTAR;CST;DXP;MSH;MTH;NCI;NDF  
RT;SNOMEDCT|1|0.8574|  
SVT|SVT;SVT - Supraventricular tachycardia|C0039240|||C0039240|DXP;SNOMEDCT|||  
SVT|Supraventricular tachycardia (disorder);Supraventricular tachycardia NOS  
(disorder)|||C0039240|SNOMEDCT|||  
SVT|Tachycardia, Supraventricular [Disease/Finding]|||C0039240|NDFRT|||  
SVT|sinoventricular tachyarrhythmia|||1|  
SVT|sinus venous thrombosis|C0740384|||1|0.0106|  
SVT|sinus-vein thrombosis|||1|  
SVT|subclavian vein thrombosis|C0749087|||C0749087|CHV|||1|  
SVT|superficial vein thrombosis;superficial venous  
thrombosis|C0235511|||1|0.0404|1|  
SVT|supraventricular|||1|0.0191|  
SVT|supraventricular tachyarrhythmia;supraventricular  
tachyarrhythmias||1|1|1|0.0723|1|  
SVT|sustained ventricular tachycardia|C0750197|||C0750197|CHV;NCI;SNOMEDCT|||1|  
SVT|symptom validity test|C0589097|||1|  
T&A|tonsillectomy and adenoidectomy|C0193959|1|1.000|C0193959|SNOMEDCT|1|1|1|  
T&A|tonsils and adenoids|||C0580788;C1284098;C2362558|MEDLINEPLUS;SNOMEDCT|||1|  
T1|1 month|C1442451|||1|0.017|  
T1|1/R1|||C2697938|NCI|||  
T1|AAC1|C1335833;C1417602|||C1335833|OMIM|||  
T1|ADENINE NUCLEOTIDE TRANSLOCATOR 1;Adenine Nucleotide Translocator-  
1|C0600149;C1335833;C1442881|||C1335833;C1442881|NCI;OMIM|||  
T1|ADP-ATP Translocase-1;ADP/ATP TRANSLOCASE 1;Heart-Skeletal Muscle ADP-ATP  
Carrier Protein-T1;Mitochondrial Adenine Nucleotide Translocator Solute Carrier  
Family 25 Member-4;SLC25A4 protein, human;Skeletal Muscle Adenine Nucleotide  
Translocator-1|C1442881|||C1335833;C1442881|MTH;NCI;OMIM|||  
T1|ADP/ATP CARRIER 1;SLC25A4;SLC25A4 Gene;SLC25A4  
gene|C1335833|||C1335833|HUGO;LNC;MTH;NCI;OMIM|||  
T1|ADP/ATP TRANSLOCATOR OF SKELETAL MUSCLE|||C1335833|OMIM|||  
T1|ANT|C0003455|||C1335833;C1442881;C1705600|NCI;OMIM|||  
T1|ANT1|C1826706|||C1335833;C1442881;C1705600|NCI;OMIM|||  
T1|CD5|||C1413227|HUGO;NCI;OMIM|||  
T1|CD5 Gene;CD5 gene;CD5 Molecule Gene|C1413227|||C1413227|HUGO;MTH;NCI|||  
T1|CD5 Molecule wt Allele;CD5 wt Allele|C2347263|||C2347263|MTH;NCI|||  
T1|CD5 molecule;LYMPHOCYTE ANTIGEN CD5|C0054964;C1413227|||C1413227|HUGO;OMIM|||  
T1|DER4;FIT-1;IL1RL1;IL1RL1 gene;IL33R;INTERLEUKIN 1 RECEPTOR-LIKE 1;interleukin  
1 receptor-like 1;INTERLEUKIN 33  
RECEPTOR;ST2V|C1416400|||C1416400|HUGO;MTH;OMIM|||  
T1|GROWTH STIMULATION-EXPRESSED GENE, MOUSE, HOMOLOG OF|||C1416400|OMIM|||  
T1|IKBKBBP;KIAA1882;NIBP;TRAPP120 kDa subunit;TRAPPC9;TRAPPC9  
gene;TRS120;tularik gene 1|C2677743|||C2677743|HUGO;MTH;OMIM|||  
T1|LEU1|||C1413227;C2347263|NCI;OMIM|||  
T1|Longitudinal Relaxation Time;longitudinal relaxation time;Spin-Lattice  
Relaxation Time;spin-lattice relaxation  
time|C2697938|||C2697938|MTH;NCI|1|0.2512|  
T1|Ly1, MOUSE, HOMOLOG OF|||C1413227|OMIM|||  
T1|MRT13|C2677743;C2750791|||C2677743|HUGO|||  
T1|NIK- AND IKKB-BINDING PROTEIN|||C2677743|OMIM|||  
T1|PEO2|C1705600;C2711773|||C1705600|NCI|||  
T1|PEO3;SLC25A4 wt Allele|C1705600|||C1705600|MTH;NCI|||  
T1|SOLUTE CARRIER FAMILY 25 (MITOCHONDRIAL CARRIER, ADENINE NUCLEOTIDE  
TRANSLOCATOR), MEMBER 4;solute carrier family 25 (mitochondrial carrier; adenine  
nucleotide translocator), member 4|||C1335833|HUGO;OMIM|||  
T1|ST2|C0450499;C1416400;C1420442|||C1416400|HUGO;OMIM|||  
T1|ST2, MOUSE, HOMOLOG OF|||C1416400|OMIM|||

T1|ST2L|C1416400;C1539983|||C1416400|HUGO|||  
T1|Solute Carrier Family 25 (Mitochondrial Carrier; Adenine Nucleotide Translocator), Member 4 Gene|||C1335833|NCI|||  
T1|Solute Carrier Family 25 (Mitochondrial Carrier; Adenine Nucleotide Translocator), Member 4 wt Allele|||C1705600|NCI|||  
T1|Spin-lattice|||1|0.1396|  
T1|Spin-lattice relaxation|||1|0.0146|  
T1|T1;t1|||C0475372;C1179687;C1335833;C1413227;C1416400;C1442881;C1705600;C2347263;C2677743;C2697938|CHV;FMA;HUGO;NCI;OMIM;SNOMEDCT;UWDA|||  
T1|T1 (MRI)|||1|0.206|||  
T1|T1 Cancer Stage Finding;T1 Primary Tumor Finding;T1 Primary Tumor Stage Finding;T1 Stage;T1 stage;T1 stage Finding;T1 stage (finding);T1 TNM Finding;T1 Tumor Finding;T1 Tumor Stage;Tumor Stage T1;Tumor stage T1;Tumour stage T1;T1 category|C0475372|||C0475372|MTH;NCI;SNOMEDCT|||  
T1|T1 category (finding)|||C0475372|SNOMEDCT|||  
T1|T1 innervation|C1179687|||C1179687|MTH|||  
T1|T1 stage (tumor staging)|||C0475372|SNOMEDCT|||  
T1|TRAFFICKING PROTEIN PARTICLE COMPLEX, SUBUNIT 9|||C2677743|OMIM|||  
T1|Time 1|||1|0.034|  
T1|admission|C0184666;C0809949|||1|0.0146|  
T1|baseline|C0168634;C1442488|||1|0.0583|  
T1|beginning|C0439659|||1|0.0182|  
T1|control group|C0009932|||1|0.0061|  
T1|degrees C|C0439237|||1|0.0121|  
T1|early|C1279919|||1|0.0182|  
T1|first|C0205435;C1279901|||1|0.0316|  
T1|first response|||1|0.0243|  
T1|first thoracic|||1|0.0109|  
T1|first thoracic (t1) nerve|||C1179687|CHV|||  
T1|first thoracic vertebra|C0459933|||C0459933|FMA;SNOMEDCT;UWDA|||  
T1|first twitch|||1|0.0607|  
T1|first twitch of the TOF|||1|0.0036|  
T1|first twitch of the train-of-four|||1|0.0085|  
T1|homolog of mouse growth stimulation-expressed|||C1416400|HUGO|||  
T1|hours|C0439227|||1|0.0109|  
T1|induction of anesthesia|C0853212|||1|0.0085|  
T1|later|||1|0.0218|  
T1|longitudinal|C0205127|||1|0.0655|  
T1|longitudinal relaxation|||1|0.017|  
T1|lowest excited triplet|||1|0.0049|  
T1|months|C0439231|||1|0.0316|  
T1|period|C0439531;C1948053|||1|0.0158|  
T1|phase|C0205390|||1|0.0121|  
T1|stage|C0205390;C1300072;C1306673|||1|0.0109|  
T1|term 1|||1|0.002|||  
T1|therapy|C0039798;C0087111;C1363945|||1|0.0146|  
T1|thoracic (level) 1|||1|0.388|||  
T1|trafficking protein particle complex 9|||C2677743|HUGO|||  
T1|tumor stage 1|||1|0.396|||  
T1|twitch height|||1|0.0291|  
T1|type 1|C0441729|||C0441729|CHV;SNOMEDCT|1|0.034|  
T1|type 1 (diabetes mellitus)|C0011854;C2984334|1|0.002|||  
T2|1/R2|||C2700066|NCI|||  
T2|2F1|||C1335834;C1442882;C1705601|HUGO;NCI|||  
T2|6 months later|||1|0.018|  
T2|AAC2|||C1335834|OMIM|||  
T2|ACAT|||C1412111|OMIM|||

T2|ACAT1|C1412111;C1420304|||C1412111|HUGO;OMIM|||  
T2|ACAT1 gene;ACETOACETYL-CoA THIOLASE, MITOCHONDRIAL;MITOCHONDRIAL ACETOACETYL-CoA THIOLASE;mitochondrial acetoacetyl-CoA thiolase;ACETYL-CoA ACETYLTRANSFERASE 1;acetyl-CoA acetyltransferase 1;THIL|C1412111|||C1412111|HUGO;MTH;OMIM|1|0.0341|  
T2|ADENINE NUCLEOTIDE TRANSLOCATOR 2;Adenine Nucleotide Translocator-2|C0600150;C1335834;C1442882|||C1335834;C1442882|NCI;OMIM|||  
T2|ADP-ATP Translocase-2;ADP/ATP TRANSLOCASE 2;Fibroblast ADP-ATP Carrier Protein;Fibroblast Adenine Nucleotide Translocator-2;Mitochondrial Adenine Nucleotide Translocator Solute Carrier Family 25 Member-5;SLC25A5 protein, human;Solute Carrier Family 25 Member-5|C1442882|||C1335834;C1442882|MTH;NCI;OMIM|||  
T2|ADP/ATP CARRIER 2;SLC25A5;SLC25A5 Gene;SLC25A5 gene|C1335834|||C1335834|HUGO;MTH;NCI;OMIM|||  
T2|ADP/ATP TRANSLOCATOR OF FIBROBLASTS|||C1335834|OMIM|||  
T2|ANT2|C1335834;C1705601|||C1335834;C1705601|NCI;OMIM|||  
T2|MAT|C0175648|||C1412111|OMIM|||  
T2|SLC25A5 wt Allele|C1705601|||C1705601|MTH;NCI|||  
T2|SOLUTE CARRIER FAMILY 25 (MITOCHONDRIAL CARRIER, ADENINE NUCLEOTIDE TRANSLOCATOR), MEMBER A5|||C1335834|OMIM|||  
T2|Solute Carrier Family 25 (Mitochondrial Carrier; Adenine Nucleotide Translocator), Member 5 Gene|||C1335834|NCI|||  
T2|Solute Carrier Family 25 (Mitochondrial Carrier; Adenine Nucleotide Translocator), Member 5 wt Allele|||C1705601|NCI|||  
T2|Spin-Spin Relaxation Time;Transverse Relaxation Time;Transverse Spin Relaxation Time|C2700066|||C2700066|MTH;NCI|||  
T2|T2|||C0475373;C1179688;C1335834;C1412111;C1442882;C1705601;C2700066|FMA;HUGO;NCI;OMIM;SNOMEDCT;UWDA|||  
T2|T2 (MRI)|||1|0.454|||  
T2|T2 Cancer Stage Finding;T2 Primary Tumor Finding;T2 Primary Tumor Stage Finding;T2 Stage;T2 stage;T2 Stage Finding;T2 stage (finding);T2 TNM Finding;T2 Tumor Finding;T2 Tumor Stage;Tumor Stage T2;Tumor stage T2;Tumour stage T2;T2 category|C0475373|||C0475373|MTH;NCI;SNOMEDCT|||  
T2|T2 Nodes|||1|0.002|||  
T2|T2 category (finding)|||C0475373|SNOMEDCT|||  
T2|T2 innervation|C1179688|||C1179688|MTH|||  
T2|T2 stage (tumor staging)|||C0475373|SNOMEDCT|||  
T2|T3|||C1335834;C1442882;C1705601|HUGO;NCI|||  
T2|Time 2;time 2|C0808270|||C0808270|LNC|1|0.0461|  
T2|acetoacetyl Coenzyme A thiolase|C1412111;C1412112|||C1412111|HUGO|||  
T2|after treatment|C0001758|||1|0.018|  
T2|degrees C|C0439237|||1|0.016|  
T2|diiodothyronine|||1|0.018|  
T2|discharge|C0012621;C0030685;C2926602|||1|0.0261|  
T2|follow-up|C0589120;C1522577;C1704685|||1|0.0401|  
T2|hours|C0439227|||1|0.0281|  
T2|minutes|C0439232;C0700321;C1282918|||1|0.018|  
T2|months|C0439231|||1|0.1022|  
T2|period|C0439531;C1948053|||1|0.022|  
T2|postoperatively|||1|0.018|  
T2|relaxation time|||1|0.3908|  
T2|second target|||1|0.014|  
T2|second thoracic|||1|0.014|  
T2|second thoracic (t2) nerve|||C1179688|CHV|||  
T2|second thoracic vertebra|C0459936|||C0459936|FMA;SNOMEDCT;UWDA|||  
T2|solute carrier family 25 (mitochondrial carrier; adenine nucleotide translocator), member 5|||C1335834|HUGO|||

T2|spin-spin relaxation|||||1|0.012|  
T2|stage B|C0441781|||||1|0.012|  
T2|term 2||1|0.002|||||  
T2|therapy|C0039798;C0087111;C1363945|||||1|0.024|  
T2|thoracic (level) 2||1|0.194|||||  
T2|transverse relaxation|||||1|0.02|  
T2|tumor stage 2||1|0.332|||||  
T2|weeks|C0439230|||||1|0.0521|  
T2|years|C0439234|||||1|0.022|  
T2|years later|||||1|0.0341|  
T3|2F1|||||C1335834;C1442882;C1705601|HUGO;NCI|||  
T3|3 months|C1442461|||||1|0.0183|  
T3|3,3',5'-triiodothyronine;3,5,3'  
Triiodothyronine|||||C0041014|SNOMEDCT|1|0.0155|  
T3|3,3',5-tri-iodothyronine|||||1|0.0127|  
T3|3,3',5-triiodo-L-thyronine|||||C0041014|NCI|||  
T3|AAC2|||||C1335834|OMIM|||  
T3|ADENINE NUCLEOTIDE TRANSLOCATOR 2;Adenine Nucleotide Translocator-  
2|C0600150;C1335834;C1442882|||||C1335834;C1442882|NCI;OMIM|||  
T3|ADP-ATP Translocase-2;ADP/ATP TRANSLOCASE 2;Fibroblast ADP-ATP Carrier  
Protein;Fibroblast Adenine Nucleotide Translocator-2;Mitochondrial Adenine  
Nucleotide Translocator Solute Carrier Family 25 Member-5;SLC25A5 protein,  
human;Solute Carrier Family 25 Member-  
5|C1442882|||||C1335834;C1442882|MTH;NCI;OMIM|||  
T3|ADP/ATP CARRIER 2;SLC25A5;SLC25A5 Gene;SLC25A5  
gene|C1335834|||||C1335834|HUGO;MTH;NCI;OMIM|||  
T3|ADP/ATP TRANSLOCATOR OF FIBROBLASTS|||||C1335834|OMIM|||  
T3|ANT2|C1335834;C1705601|||||C1335834;C1705601|NCI;OMIM|||  
T3|L-3,3',5-triiodothyronine;L-3,5,3'-triiodothyronine|||||1|0.0535|  
T3|L-Triiodothyronine;L-triiodothyronine;l-  
Triiodothyronine|C0041014;C2936843|||||C0041014;C2936843|NCI;NDFRT;PDQ|1|0.1786|  
T3|L-Tyrosine, O-(4-hydroxy-3-iodophenyl)-3,5-diiido-|||||C0041014|MSH;NDFRT|||  
T3|L-triiodothyronine preparation;LIOTHYRONINE;Liothyronine;liothyronine;T-  
3;T>3<;T3 - Liothyronine;T3 - Triiodothyronine;T3 Thyroid Hormone;Thyroid  
Hormone, T3;t3 thyroid hormone;T3 preparation;Therapeutic T3;Tri-iodothyronine  
product;Triiodothyronine preparation;therapeutic  
triiodothyronine|C0041014|||||C0041014|CHV;MSH;MTHSPL;NCI;NDFRT;PDQ;SNOMEDCT;USPMG  
;VANDF|||  
T3|Liothyronine (product)|||||C0041014|SNOMEDCT|||  
T3|Liothyronine (substance)|||||C0041014|SNOMEDCT|||  
T3|SLC25A5 wt Allele|C1705601|||||C1705601|MTH;NCI|||  
T3|SOLUTE CARRIER FAMILY 25 (MITOCHONDRIAL CARRIER, ADENINE NUCLEOTIDE  
TRANSLOCATOR), MEMBER A5|||||C1335834|OMIM|||  
T3|Solute Carrier Family 25 (Mitochondrial Carrier; Adenine Nucleotide  
Translocator), Member 5 Gene|||||C1335834|NCI|||  
T3|Solute Carrier Family 25 (Mitochondrial Carrier; Adenine Nucleotide  
Translocator), Member 5 wt Allele|||||C1705601|NCI|||  
T3|T AAA THYROID HORMONE 003|||||C0041014|MSH|||  
T3|T2|||||C1335834;C1442882;C1705601|HUGO;NCI|||  
T3|T3;t3|||||C0041014;C0428419;C0475374;C1235740;C1335834;C1442882;C1705601;C2936  
843|CHV;CSP;FMA;HUGO;NCI;NDFRT;SNOMEDCT;UWDA|||  
T3|T3 (ECG pattern)||1|0.008|||||  
T3|T3 - Triiodothyronine level;Total T3;total T3;Triiodothyronine  
Measurement;Triiodothyronine measurement;Triiodothyronine  
level|C0428419|||||C0428419|MTH;NCI;SNOMEDCT|1|0.0084|  
T3|T3 Cancer Stage Finding;T3 Primary Tumor Finding;T3 Primary Tumor Stage  
Finding;T3 Stage;T3 stage;stage t3;t3 stage;T3 Stage Finding;T3 stage

(finding);T3 TNM Finding;T3 Tumor Finding;T3 Tumor Stage;Tumor Stage T3;Tumor stage T3;Tumour stage T3;T3 category|C0475374|||C0475374|CHV;MTH;NCI;SNOMEDCT|||  
T3|T3 category (finding)|||C0475374|SNOMEDCT|||  
T3|T3 stage (tumor staging)|||C0475374|SNOMEDCT|||  
T3|T3 thoracic segmental innervation;third thoracic vertebra nerves|C1235740|||C1235740|CHV;MTH|||  
T3|T<sub>3</sub>|||C0041014|SNOMEDCT|||  
T3|T<sub>3</sub> preparation|||C0041014|SNOMEDCT|||  
T3|T>3< preparation|||C0041014|SNOMEDCT|||  
T3|Thyroid hormone|C0040135|||1|0.4543|  
T3|Total Triiodothyronine;Total triiodothyronine;Triiodothyronine;triiodothyronin;triiodothyronine|C0041014;C0428419|1|0.536|C0041014;C0428419|AOD;CHV;CSP;LCH;LNC;MSH;MTH;NCI;NDFRT;PDQ;RXNORM;SNOMEDCT|1|0.0183|  
T3|Triiodothyronine (substance)|||C0041014|SNOMEDCT|||  
T3|Triiodothyronine [Chemical/Ingredient]|||C0041014|NDFRT|||  
T3|Triiodothyronine measurement (procedure)|||C0428419|SNOMEDCT|||  
T3|Triiodothyronine preparation (product)|||C0041014|SNOMEDCT|||  
T3|Triiodothyronine preparation (substance)|||C0041014|SNOMEDCT|||  
T3|Tylenol with codeine|C0724034|||1|  
T3|Type 3;type 3|C0441731|||C0441731|CHV;SNOMEDCT|1|0.0155|  
T3|[125I]triiodothyronine|||1|0.0155|  
T3|advanced|C0205179|||1|0.0127|  
T3|after|C0231290;C0687676|||1|0.0253|  
T3|hours|C0439227|||1|0.0169|  
T3|l-Triiodothyronine (T3)|||C2936843|NDFRT|||  
T3|l-Triiodothyronine [EPC];l-Triiodothyronine-containing Agent|C2936843|||C2936843|MTH;NDFRT|||  
T3|later|||1|0.0155|  
T3|period|C0439531;C1948053|||1|0.0155|  
T3|solute carrier family 25 (mitochondrial carrier; adenine nucleotide translocator), member 5|||C1335834|HUGO|||  
T3|term 3||1|0.004|||  
T3|third thoracic vertebra|C0459952|||C0459952|FMA;SNOMEDCT;UWDA|||  
T3|thoracic (level) 3||1|0.130|||  
T3|thyroid hormone 3,3',5-triiodo-L-thyronine|||1|0.0098|  
T3|transurethral thermoablation therapy|||1|  
T3|treatment|C0039798;C0087111;C1522326;C1533734;C1705169;C3161471|||1|0.0183|  
T3|triiodothyronine|||1|0.0267|  
T3|triiodothyroxine|||1|0.0197|  
T3|triiodothyronine|||1|0.0183|  
T3|tumor stage 3||1|0.312|||  
T3|weeks|C0439230|||1|0.0155|  
T3|years|C0439234|||1|0.0155|  
T4|3,5,3',5'-Tetraiodothyronine;3,5,3'5'  
Tetraiodothyronine|||C0040165|MSH;NDFRT;SNOMEDCT|||  
T4|L Thyroxine;L-Thyroxine;l thyroxine;l-Thyroxine;l-thyroxine|C0040165;C1881373;C2936885|||C0040165;C2936885|CHV;MSH;NDFRT|||  
T4|L-3,5,3',5'-Tetraiodothyronine|||C0040165|MSH;NDFRT|||  
T4|L-3,5,5'-tetraiodothyronine|||C0040165|NCI|||  
T4|LEVOTHYROXINE;Levothyroxine;levothyroxine|C0040165;C1881373|||C0040165|CHV;MSH;MTHSPL;NDFRT;PDQ;USPMG;VANDF|1|0.0259|  
T4|O-(4-Hydroxy-3,5-diiodophenyl) 3,5-diiodo-L-tyrosine|||C0040165|MSH;NDFRT|||  
T4|O-(4-Hydroxy-3,5-diiodophenyl)-3,5-diiodotyrosine|||C0040165|MSH;NDFRT|||  
T4|T AAB THYROID HORMONE 004|||C0040165|MSH|||  
T4|T helper|||1|0.0155|  
T4|T helper cells|C0018894|||1|0.0086|

T4|T4||||C0040165;C0475751;C1235738;C1281902;C2936885|CHV;CSP;FMA;NCI;NDFRT;PDQ;SNOMEDCT;UWDA|||

T4|T4 - Thyroxine;thyroxine (T4);T4 Thyroid Hormone;Thyroid Hormone, T4;T4 preparation;TT4 - Total thyroxine;Tetraiodothyronine preparation;Thyroxine preparation;Thyroxine product;Total thyroxine|C0040165|||C0040165|CHV;MSH;NDFRT;SNOMEDCT|||

T4|T4 Cancer Stage Finding;T4 Primary Tumor Finding;T4 Primary Tumor Stage Finding;T4 Stage;T4 stage;T4 Stage Finding;T4 stage (finding);T4 TNM Finding;T4 Tumor Finding;T4 Tumor Stage;Tumor Stage T4;Tumor stage T4;Tumour stage T4;T4 category|C0475751|||C0475751|MTH;NCI;SNOMEDCT|||

T4|T4 category (finding)|||C0475751|SNOMEDCT|||

T4|T4 stage (tumor staging)|||C0475751|SNOMEDCT|||

T4|T4 thoracic segmental innervation;fourth thoracic vertebra nerves|C1235738|||C1235738|CHV;MTH|||

T4|T<sub>4</sub>|||C0040165|SNOMEDCT|||

T4|T<sub>4</sub> preparation|||C0040165|SNOMEDCT|||

T4|T>4|||C0040165|SNOMEDCT|||

T4|T>4 preparation|||C0040165|SNOMEDCT|||

T4|THROXINE L|||C0040165|MSH|||

T4|Tetraiodothyronine preparation (product)|||C0040165|SNOMEDCT|||

T4|Tetraiodothyronine preparation (substance)|||C0040165|SNOMEDCT|||

T4|Thyroxin;Thyroxine;thyroxin;thyroxine|C0040165;C1281902|1|0.848|C0040165;C1281902|AOD;CHV;CSP;LCH;LNC;MSH;MTH;NCI;NDFRT;PDQ;RXNORM;SNOMEDCT|||

T4|Thyroxine (substance)|||C0040165|SNOMEDCT|||

T4|Thyroxine [Chemical/Ingredient]|||C0040165|NDFRT|||

T4|Total T4;Total Thyroxine Measurement;Total thyroxine measurement;Total thyroxine level|C1281902|||C1281902|MTH;NCI;SNOMEDCT|||

T4|Total thyroxine measurement (procedure)|||C1281902|SNOMEDCT|||

T4|Tyrosine, O-(4-hydroxy-3,5-diiodophenyl)-3,5-diiodo-|||C0040165|MSH;NDFRT|||

T4|fourth thoracic vertebra|C0459951|||C0459951|FMA;SNOMEDCT;UWDA|||

T4|helper/inducer|||1|0.0276|

T4|invasion|C1269955;C2699153|||1|0.0172|

T4|l-Thyroxine (T4)|||C2936885|NDFRT|||

T4|l-Thyroxine [EPC];l-Thyroxine-containing Agent|C2936885|||C2936885|MTH;NDFRT|||

T4|later|||1|0.0155|

T4|locally advanced|||1|0.0241|

T4|months|C0439231|||1|0.019|

T4|serum thyroxine|C0036833|||1|0.7879|

T4|thoracic (level) 4||1|0.082|||

T4|thyroid hormone|C0040135|||1|0.0259|

T4|thyroxine level|C0202231;C0428416|||1|0.0103|

T4|tripchlorolide|C0146876|||1|0.0224|

T4|tumor stage 4||1|0.070|||

T8|T8;T8 innervation|C1179692|||C1179692|FMA;MTH;UWDA|||

T8|eighth thoracic (t8) nerve|||C1179692|CHV|||

T8|eighth thoracic vertebra|C0459953|||C0459953|FMA;SNOMEDCT;UWDA|||

T8|thoracic (level) 8||1|1.000|||

T9|CD71|||C1619635|LNC;NCI|||

T9|CD71 Antigen;CD71 antigen;Lymphocyte antigen CD71;Transferrin Receptor Protein 1|C1619635|||C1619635|MSH;MTH;NCI;SNOMEDCT|||

T9|Lymphocyte antigen CD71 (substance)|||C1619635|SNOMEDCT|||

T9|MESOTRYPSIN;mesotrypsin;MESOTRYPSINOGEN;PROTEASE, SERINE, 3;protease, serine, 3;PRSS3;PRSS3 gene;TRY3;TRYPSINOGEN 3|C1418972|||C1418972|HUGO;MTH;OMIM|||

T9|T9|C1179693;C1418972;C1619635|||C1179693;C1418972;C1619635|FMA;NCI;OMIM;UWDA|||

T9|T9 innervation|C1179693|||C1179693|MTH|||

T9|TFR|||C1619635|NCI|||  
T9|TFR1;Transferrin Receptor 1|C1420708;C1619635||C1619635|NCI|||  
T9|TFRC;TRFR|C1420708;C1619635;C1705610||C1619635|NCI|||  
T9|TR|||C1619635|NCI|||  
T9|TRY4|C1418972;C3150814||C1418972|HUGO|||  
T9|Transferrin Receptor|C0034845;C1420708;C1619635||C1619635|NCI|||  
T9|ninth thoracic (t9) nerve|||C1179693|CHV|||  
T9|ninth thoracic vertebra|C0459954||C0459954|FMA;SNOMEDCT;UWDA|||  
T9|p90|C1413107;C1537472;C1619635||C1619635|NCI|||  
T9|thoracic|||||1|1|  
T9|thoracic (level) 9||1|1.000|||  
T10|ADP-Ribosyl Cyclase 1|C1413221;C2827388||C2827388|MTH;NCI|||  
T10|CD38|||C2827388|NCI|||  
T10|CD38 Antigen|C0075742;C1413221;C2827388||C2827388|NCI|||  
T10|CD38 Antigen (p45) Gene|||C2827387|NCI|||  
T10|CD38 Molecule wt Allele;CD38 wt Allele|C2827387||C2827387|MTH;NCI|||  
T10|Cyclic ADP-Ribose Hydrolase 1;EC3.2.2.5;cADPr Hydrolase  
1|C2827388||C2827388|NCI|||  
T10|T10;t10|C1179694;C2827387;C2827388||C1179694;C2827387;C2827388|CHV;FMA;NCI;  
UWDA|||  
T10|T10 - Thoracic segmental innervation|C1179694||C1179694|MTH|||  
T10|tenth thoracic (T10) nerve|||C1179694|CHV|||  
T10|tenth thoracic vertebra|C0459955||C0459955|FMA;SNOMEDCT;UWDA|||  
T10|thoracic (level) 10||1|1.000|||  
T11|CD2|C1367475;C2347546||C1367475|HUGO;NCI;OMIM|||  
T11|CD2 Antigen (p50), Sheep Red Blood Cell Receptor Gene|||C1367475|NCI|||  
T11|CD2 Antigen (p50), Sheep Red Blood Cell Receptor wt  
Allele|||C1705087|NCI|||  
T11|CD2 Gene;CD2 gene;SHEEP ERYTHROCYTE RECEPTOR;T-LYMPHOCYTE SURFACE CD2  
ANTIGEN|C1367475||C1367475|HUGO;MTH;NCI;OMIM|||  
T11|CD2 molecule|C0108773;C1367475||C1367475|HUGO|||  
T11|CD2 wt Allele|C1705087||C1705087|MTH;NCI|||  
T11|SRBC|C1367475;C1418917;C1705087||C1367475;C1705087|NCI;OMIM|||  
T11|T11|C1179695;C1367475;C1705087||C1179695;C1367475;C1705087|FMA;NCI;OMIM;UWD  
A|||  
T11|T11 innervation|C1179695||C1179695|MTH|||  
T11|eleventh thoracic (T11) nerve|||C1179695|CHV|||  
T11|eleventh thoracic vertebra|C0459956||C0459956|FMA;SNOMEDCT;UWDA|||  
T11|thoracic (level) 11||1|1.000|||  
T12|12 months|||||1|1|  
T12|CD 6 antigen;CD6 - Cluster of differentiation antigen 6;Cluster of  
differentiation antigen 6;Lymphocyte antigen CD6;T-cell lineage 12;T12 - T-cell  
lineage 12|C0054967||C0054967|MSH;SNOMEDCT|||  
T12|CD6|||C0054967|CSP;LNC|||  
T12|CD6 Antigen;CD6 antigen;T-Cell Differentiation Antigen  
CD6|C0054967;C1413232||C0054967|MSH;MTH;NCI|||  
T12|Lymphocyte antigen CD6 (substance)|||C0054967|SNOMEDCT|||  
T12|Message structure -T12|C1549876||C1549876|MTH|||  
T12|T12|C0054967;C1179696;C1549876||C0054967;C1179696;C1549876|FMA;HL7V2.5;NCI;  
UWDA|||  
T12|T12 Thoracic segmental innervation|C1179696||C1179696|MTH|||  
T12|TP120|C0054967;C1413232;C2347264||C0054967|NCI|||  
T12|thoracic (level) 12||1|1.000|||  
T12|transkarbam 12|C1505043||C1505043|MSH|||  
T12|twelfth thoracic (T12) nerve|||C1179696|CHV|||  
T12|twelfth thoracic vertebra|C0459957||C0459957|FMA;SNOMEDCT;UWDA|||

TAH|Abdominal panhysterectomy;Bonney operation hysterectomy;Richardson operation hysterectomy;TAH - Total abdominal hysterectomy;Total Abdominal Hysterectomy;Total abdominal hysterectomy;Total abdominal hysterectomy, NOS;abdominal hysterectomy total;total abdominal hysterectomy;tah|C0404079|1|1|C0404079|CCS;CHV;ICD9CM;MTH;NCI;SNOMEDCT|1|0.2578|1

TAH|Total abdominal hysterectomy (procedure)|||C0404079|SNOMEDCT|||

TAH|Total hysterectomy without removal of tube or ovary|||C0404079|SNOMEDCT|||

TAH|abdominal hysterectomys total|||C0404079|CHV|||

TAH|total artificial heart|C0182433|||C0182433|CHV;CSP|1|0.7422|1

TBI|BRAIN INJ TRAUMATIC;INJ BRAIN TRAUMATIC;TRAUMATIC BRAIN INJ|||C0876926|MSH|||

TBI|Brain Injuries, Traumatic;Brain Injury, Traumatic;Injuries, Traumatic Brain;Injury, Brain, Traumatic;Injury, Traumatic Brain;Traumatic Brain Injuries;Traumatic Brain Injury;Traumatic brain injury;brain injuries traumatic;brain injury traumatic;traumatic brain injuries;traumatic brain injury;Brain Trauma;Brain Traumas;Trauma, Brain;Traumas, Brain;brain trauma;brain traumas;Brain damage - traumatic;traumatic brain damage;TBI|C0876926|1|0.042|C0876926|CHV;CSP;LNC;MEDLINEPLUS;MSH;MTH;SNOMEDCT|1|0.6371|1

TBI|Brain damage - traumatic (disorder)|||C0876926|SNOMEDCT|||

TBI|ENCEPH TRAUMATIC;TRAUMATIC ENCEPH|||C0876926|MSH|||

TBI|Encephalopathies, Traumatic;Encephalopathy, Traumatic;Traumatic Encephalopathies;Traumatic Encephalopathy;Traumatic encephalopathy;traumatic encephalopathy|C0236959;C0876926|||C0876926|CHV;MSH;NCI;SNOMEDCT|||

TBI|TBI (Traumatic Brain Injury);TBI (traumatic brain injury);TBIs (Traumatic Brain Injury)|||C0876926|CSP;MSH|||

TBI|TSH binding inhibition|||1|0.002|

TBI|Traumatic brain injury (disorder)|||C0876926|SNOMEDCT|||

TBI|Traumatic encephalopathy (disorder)|||C0876926|SNOMEDCT|||

TBI|Traumatic encephalopathy (disorder) [Ambiguous]|||C0876926|SNOMEDCT|||

TBI|brain injured|||1|0.0068|

TBI|thrombotic brain infarction|||1|

TBI|thyroxine-binding index|C1441288|||1|

TBI|tick-borne illness|||1|

TBI|toe-brachial index|C2116889|||C2116889|MSH|||

TBI|tooth-brushing instruction|||1|

TBI|total body irradiation|C0043162|1|0.958|C0043162|CHV;MSH;NCI;SNOMEDCT|1|0.3469|1

TBI|tracheobronchial injury|||1|

TBI|traumatic brain-injured|||1|0.0034|

TBI|traumatically brain-injured|||1|0.0037|

TBI|tumor burden index|||1|

TB|1,2,3-Propanetriyl Butanoate|||C0077025|NCI;PDQ|||

TB|1,2,3-Tributyrylglycerol|||C0077025|NCI;PDQ|||

TB|Butanoic Acid 1,2,3-Propanetriyl Ester;Butanoic Acid, 1,2,3-Propanetriyl Ester;butanoic acid, 1,2,3- propanetriyl ester|||C0077025|MSH;NCI;PDQ|||

TB|Butyryl Triglyceride;Glyceryl Tributyrate;Glyceryl tributyrate;glyceryl tributyrate;TRIBUTYRIN;Tributyryl;tributyryl;tributyrylglycerol|C0077025|||C0077025|MSH;MTH;NCI;PDQ|1|0.0022|

TB|Disease, Koch's;Koch Disease;Koch's Disease;Disease, Kochs;Kochs Disease;INFECTION TBC;INFECTION TUBERCULOSIS;infection tuberculosis;tuberculosis infection;Infection due to Mycobacterium tuberculosis;TB - Tuberculosis;tuberculosis (TB);TUBERCULOSIS;Tuberculoses;Tuberculosis;Tuberculosis NOS;Tuberculosis, NOS;tuberculosis;Tuberculous;tuberculous|C0041296|1|1|C0041296|AOD;CCS;CHV;COSTA R;CSP;CST;DXP;ICD9CM;LCH;LNC;MEDLINEPLUS;MSH;MTH;NCI;NDFRT;SNOMEDCT|1|0.803|1

TB|Infection due to Mycobacterium tuberculosis (disorder)||||C0041296|SNOMEDCT|||

TB|MTB - Mycobacterium tuberculosis infection|||C0041296|SNOMEDCT|||

TB|Mycobacterium tuberculosis infection|||C0041296|SNOMEDCT|||

TB|TB|||C0041296;C0077025;C0332289;C1704474|CHV;MEDLINEPLUS;NCI;PDQ;SNOMEDCT|||

TB|TBC|||C0041296|CHV|||

TB|TUBE;Tube;Tubes|C0175730;C1547937;C1561954;C1704474;C1704730;C1704731|||C1704474|NCI;SNOMEDCT|||

TB|Tapes for the Blind|||1|0.0041|

TB|Thoroughbred|||1|0.0041|

TB|Transmitted by;transmit;transmits;transmitted;transmitted by;transmitting|C0242781;C0332289;C1521797|||C0332289|CHV;MTH;SNOMEDCT|||

TB|Transmitted by (attribute)|||C0332289|SNOMEDCT|||

TB|Tris-borate|||1|0.0024|

TB|Trypanosoma brucei|C0041217|||1|0.0022|

TB|Tube (qualifier value)|||C1704474|SNOMEDCT|||

TB|Tube - unit dose;Tube Dosing Unit;Tube - unit of product usage|C1704474|||C1704474|MTH;NCI;SNOMEDCT|||

TB|Tube - unit of product usage (qualifier value)|||C1704474|SNOMEDCT|||

TB|Tuberculosis (disorder);Tuberculosis NOS (disorder)|||C0041296|SNOMEDCT|||

TB|Tuberculosis [Disease/Finding]|||C0041296|NDFRT|||

TB|Tuberculous (disorder)|||C0041296|SNOMEDCT|||

TB|Tuberculous (qualifier value)|||C0041296|SNOMEDCT|||

TB|anti-tuberculosis|||1|0.0032|

TB|biologic half-life|||1|

TB|body temperature|C0005903|||1|0.0829|

TB|terbium|C0039541|||1|0.0034|

TB|term birth|C0233324|||1|

TB|terminal bronchiole|C0225666;C1269572;C1280599|||1|

TB|terrible burning|||1|

TB|testosterone buciclate|C0164583|||1|0.0022|

TB|theobromine|C0039763|||1|0.0071|

TB|thiabendazole|C0039832|||1|0.0022|

TB|thiobenzamide|C0076443|||1|0.0029|

TB|thought broadcasting|C0233688|||1|

TB|thromboxane B|||1|

TB|thymol blue|C0076605|||1|

TB|tissue basophils|C0024880|||1|0.0022|

TB|tolbutamide|C0040374|||1|0.0029|

TB|toluidine blue|C0040380|||1|0.009|1

TB|toothbrush|C0040461;C0183975|||1|

TB|total base|||1|

TB|total bilirubin|C0005437;C0201913;C0368753|||1|0.008|

TB|total body|C0229960|||1|0.0115|1

TB|total bound|||1|

TB|tracheal bronchial|||1|

TB|tracheobronchial|C0450123|||1|0.0056|

TB|tracheobronchitis|C0040586|||1|

TB|trapezoid body|C0152379;C1289448|||1|0.0032|1

TB|triceps brachii|C0559502;C1279040|||1|0.0102|

TB|trypan blue|C0041213|||1|0.0112|

TB|tub bath|||1|

TB|tubercle bacillus|||1|

TB|tuberculin|C0034131;C0041289;C1532464|||C0034131;C0041289;C1532464|CHV;LCH;LNC;MSH;MTH;NCI;NDFRT;RXNORM;SNOMEDCT|||1

TB|tumor bearing;tumor-bearing|||1|0.0183|1

TEDS|thromboembolic disease stockings|||1|1.000|||1|

TEDS|transesophageal echo-Doppler system|||||||1  
TEDS|treatment episode data set|||||||1  
TEE|ECHOCARDIOGR TRANSESOPHAGEAL||||C0206054|MSH|||  
TEE|Echocardiography, Transesophageal;Transesophageal  
Echocardiography;Transesophageal echocardiography;Transoesophageal  
echocardiography;transesophageal echocardiography;TEE procedure;TOE -  
Transesophageal echocardiography;TOE - Transoesophageal  
echocardiography;Transesophageal echocardiogram;Transoesophageal  
echocardiogram;echocardiograms transesophageal;transesophageal  
echocardiogram|C0206054|||C0206054|CHV;MSH;MTH;MTHICD9;NCI;SNOMEDCT|1|0.8121|1  
TEE|TEE;Tee Device Component;Transesophageal Echocardiogram  
Device|C1710361|||C0206054;C1710361|MSH;MTH;NCI|||  
TEE|Transesophageal echocardiography (procedure);Transoesophageal  
echocardiography (procedure)|||C0206054|SNOMEDCT|||  
TEE|thermal effect of exercise|||||||1  
TEE|total energy expended|||||||1  
TEE|total energy expenditure|C0429629|||||1|0.142|  
TEE|transesophageal echocardiograph||1|1.000|||||1  
TEE|transesophageal echocardiographic||||||1|0.0377|  
TEE|transesophageal echography||||||1|0.0082|  
TEE|transnasal endoscopic ethmoidectomy|||||||1  
TEE|tyrosine ethyl ester|||||||1  
TENS|Antibiotic necrolysis|||C0014518|SNOMEDCT|||  
TENS|EPIDERMAL NECROLYSIS TOX;TOX EPIDERMAL NECROLYSIS|||C0014518|MSH|||  
TENS|EPIDERMOLYSIS, ACUTE TOXIC;Epidermal Necrolyses, Toxic;Epidermal  
Necrolysis, Toxic;NECROLYSIS, TOXIC EPIDERMAL;Necrolyses, Toxic  
Epidermal;Necrolysis, Toxic Epidermal;Toxic Epidermal Necrolyses;Toxic Epidermal  
Necrolysis;Toxic epidermal necrolysis;toxic epidermal necrolyses;toxic epidermal  
necrolysis;LYELL SYNDROME;LYELL'S SYNDROME;Lyell Syndrome;Lyell's  
Syndrome;Lyell's syndrome;Lyells Syndrome;SYNDROME LYELL'S;Syndrome,  
Lyell's;lyell syndrome;lyell's syndrome;lyells syndrome;Lyell toxic epidermal  
necrolysis, subepidermal type;Lyell's toxic epidermal necrolysis, subepidermal  
type;Nonstaphylococcal Scalded Skin Syndrome;Scalded Skin Syndrome,  
Nonstaphylococcal;TEN - Toxic epidermal necrolysis;TOXIC EPIDEONEAL  
NECROLYSIS;lyell;lyells|C0014518|||C0014518|CHV;COSTAR;CSP;CST;DXP;ICD9CM;LCH;MS  
H;MTH;MTHICD9;NCI;NDFRT;SNOMEDCT|||  
TENS|Electric Stimulation, Transcutaneous;Stimulation, Transcutaneous  
Electric;Transcutaneous Electric Stimulation;Electrical Stimulation,  
Transcutaneous;Stimulation, Transcutaneous Electrical;Transcutaneous Electrical  
Stimulation;Electrostimulation, Transdermal;Transdermal  
Electrostimulation;transdermal electrostimulation;Nerve Stimulation,  
Transcutaneous;Stimulation, Transcutaneous Nerve;Transcutaneous Nerve  
Stimulation;transcutaneous nerve stimulation;Percutaneous Electric Nerve  
Stimulation;Percutaneous Electrical Nerve Stimulation;TCNS - Transcutaneous  
nerve stimulation;TENS - Transcutaneous electrical nerve  
stimulation;Transcutaneous Electrical Nerve Stimulation (TENS);transcutaneous  
electrical nerve stimulation (TENS);TNS - Transcutaneous nerve  
stimulation;Transcutaneous Electric Nerve Stimulation;transcutaneous electric  
nerve stimulation;Transcutaneous Electrical Nerve Stimulation;Transcutaneous  
electrical nerve stimulation;transcutaneous electrical nerve  
stimulation;Transcutaneous electrical neural stimulation;Transcutaneous nerve  
stimulation therapy|C0040654|||C0040654|CHV;LNC;MSH;MTH;NCI;SNOMEDCT|1|1|  
TENS|Epidermal Necrolysis, Toxic [Disease/Finding]|||C0014518|NDFRT|||  
TENS|Leyell's syndrome|||C0014518|SNOMEDCT|||  
TENS|Lyell's toxic epidermal necrolysis, subepidermal type  
(disorder)|||C0014518|SNOMEDCT|||

TENS|NONSTAPH SCALDED SKIN SYNDROME;SCALDED SKIN SYNDROME  
NONSTAPH|||C0014518|MSH|||  
TENS|Necrosis - toxic;Toxic necrosis|||C0014518|SNOMEDCT|||  
TENS|TEN|C0014518;C0205456|||C0014518|NCI|||  
TENS|TENS;tens|||C0014518;C0040654|CHV;DXP;MSH;NCI|||  
TENS|Toxic epidrml necrosis|||C0014518|ICD9CM|||  
TENS|Transcutaneous electrical nerve stimulation  
(procedure)|||C0040654|SNOMEDCT|||  
TENS|Transcutaneous electrical nerve stimulation  
(regime/therapy)|||C0040654|SNOMEDCT|||  
TENS|transcutaneous electrical nerve stimulator|C0491576|||C0491576|SNOMEDCT|||  
TENS|transcutaneous electrical neuromuscular stimulation|||1  
TENS|transcutaneous electrical neuromuscular stimulator||1|1.000|||1  
THC|(-)-.DELTA.9-Tetrahydrocannabinol;Delta 9-Tetrahydrocannabinol;delta 9-  
tetrahydrocannabinol;delta(9)-Tetrahydrocannabinol;delta-9-  
Tetrahydrocannabinol;delta-9-tetrahydrocannabinol;9 ene Tetrahydrocannabinol;9-  
ene-Tetrahydrocannabinol;DRONABINOL;Dronabinol;dronabinol;Synthetic delta-9-  
Tetrahydrocannabinol;Tetrahydrocannabinol;tetrahydrocannabinol;tetrahydrocanni  
nol  
(THC)|C0039663|1|1|C0039663|AOD;CHV;CSP;LCH;LNC;MSH;MTH;MTHSPL;NCI;NDFRT;PDQ;RXN  
ORM;SNOMEDCT;USPMG;VANDF|1|0.7902|1  
THC|6H-Dibenzo(b,d)pyran-1-ol, 6a,7,8,10a-tetrahydro-6,6,9-trimethyl-3-pentyl-,  
(6aR-trans)-|||C0039663|MSH;NDFRT|||  
THC|DELTA THC 09|||C0039663|MSH|||  
THC|Dronabinol (product)|||C0039663|SNOMEDCT|||  
THC|Dronabinol (substance)|||C0039663|SNOMEDCT|||  
THC|IMD2|C0043194;C0258432;C1705616|||C1705616|NCI|||  
THC|THC|C0039663;C1705616;C1839163|||C0039663;C1705616;C1839163|AOD;CHV;CSP;MSH;  
NCI;NDFRT;OMIM;PDQ|||  
THC|THC1;THROMBOCYTOPENIA 1;THROMBOCYTOPENIA 1 (disorder);THROMBOCYTOPENIA, X-  
LINKED;XLT|C1839163|||C1839163|MTH;OMIM|||  
THC|THROMBOCYTOPENIA, X-LINKED, 1|C1839163;C2678137|||C1839163|OMIM|||  
THC|Tetrahydrocannabinol (substance)|||C0039663|SNOMEDCT|||  
THC|Tetrahydrocannabinol [Chemical/Ingredient]|||C0039663|NDFRT|||  
THC|WAS wt Allele;Wiskott-Aldrich syndrome Gene|C1705616|||C1705616|MTH;NCI|||  
THC|WASP|C0043041|||C1705616|NCI|||  
THC|Wiskott-Aldrich Syndrome (Eczema-Thrombocytopenia) wt  
Allele|||C1705616|NCI|||  
THC|delta 1-tetrahydrocannabinol;delta(1)-  
Tetrahydrocannabinol|||C0039663|MSH;NDFRT|1|0.0102|  
THC|delta(1)-THC|||C0039663|MSH;NDFRT|||  
THC|delta(9)-THC|||C0039663|MSH;NDFRT|||  
THC|delta-9-Tetrahydrocannabinol (substance)|||C0039663|SNOMEDCT|||  
THC|delta9-tetrahydrocannabinol|||1|0.1576|  
THC|tetrahydrocortisol|C0039664|||1  
THC|tetrahydrocortisone|C0039665|||1  
THC|tetrahydrocurcumin|C0382876|||C0382876|MSH|1|0.0113|  
THC|thigh circumference|||1  
THC|thiocarbanidin|C2699929|||1  
THC|total haemocyte count|||1|0.0204|  
THC|total hydrocarbon|||1|0.0102|  
THC|transhepatic cholangiogram|||1  
THC|transhepatic cholangiograph|||1  
THC|transhepatic cholangiography|||1  
THC|transplantable hepatocellular carcinoma|||1  
TIA|ATTACK, TRANSIENT ISCHEMIC;Attack, Transient Ischemic;Attacks, Transient  
Ischemic;ISCHEMIC ATTACK, TRANSIENT;Ischemic Attack, Transient;Ischemic Attacks,

Transient;TRANSIENT ISCHEMIC ATTACK;TRANSIENT ISCHEMIC ATTACKS;Transient Ischemic Attack;Transient Ischemic Attacks;Transient ischaemic attack;Transient ischaemic attacks;Transient ischemic attack;Transient ischemic attacks;attack ischemic transient;attacks ischemic transient;ischemic attack transient;transient ischaemic attack;transient ischaemic attacks;transient ischemic attack;transient ischemic attacks;Brain TIA;TIA, Brain;brain tia;tia brain;STROKE, TEMPORARY;TIA (Transient Ischemic Attack);TIA - Transient ischaemic attack;TIAs (Transient Ischemic Attack);transient ischemic attack (TIA);Temporary cerebral vascular dysfunction;transient cerebral ischemic attack|C0007787|1|1|C0007787|AOD;CHV;COSTAR;CSP;CST;DXP;LNC;MEDLINEPLUS;MSH;MTH;MTHICD9;NCI;NDFRT;OMIM;SNOMEDCT|1|0.9153|1

TIA|CEREBRAL ISCHEMIA, TRANSIENT;Cerebral Ischemia, Transient;Cerebral Ischemias, Transient;Ischemia, Transient Cerebral;Ischemias, Transient Cerebral;Transient Cerebral Ischemia;Transient Cerebral Ischemias;Transient cerebral ischaemia;Transient cerebral ischaemia NOS;Transient cerebral ischaemia, NOS;Transient cerebral ischemia;Transient cerebral ischemia NOS;Transient cerebral ischemia, NOS;transient cerebral ischemia|C0007787;C0917805|||C0007787;C0917805|CCS;CHV;COSTAR;DXP;ICD9CM;ICPC;MSH;MTH;SNOMEDCT|||

TIA|CEREBRAL ISCHEMIA, TRANSITORY;Unspecified transient cerebral ischemia|C0917805|||C0917805|DXP;ICD9CM|||

TIA|Ischemic Attack, Transient [Disease/Finding]|||C0007787|NDFRT|||

TIA|Polynesian arrowroot;Tacca leontopetaloides;Tacca leontopetaloides (L.) Kuntze;Tacca pinnatifida|C1054154|||C1054154|MTH;NCBI|||

TIA|T-cell-restricted intracellular antigen|||1|

TIA|TIA;tia|C0007787;C0917805;C1054154|||C0007787;C0917805;C1054154|AOD;CHV;CSP;CST;DXP;MEDLINEPLUS;MTHICD9;NCBI;NCI;SNOMEDCT|||

TIA|Tacca pinnatifida J.R.Forst. & G.Forst.|||C1054154|NCBI|||

TIA|Test Anxiety Inventory|||1|

TIA|Thrombosis-inducing activity|||1|0.0131|

TIA|Trans cereb ischemia NOS|||C0917805|ICD9CM|||

TIA|Transient cer. ischaem.|||C0917805|SNOMEDCT|||

TIA|Transient cer. ischem.|||C0917805|SNOMEDCT|||

TIA|Transient cerebral ischaemia NOS (disorder);Transient cerebral ischemia (disorder);Transient cerebral ischemia NOS (disorder)|||C0007787;C0917805|SNOMEDCT|||

TIA|Transient cerebral ischemia (disorder) [Ambiguous]|||C0007787|SNOMEDCT|||

TIA|Transient ischemic attack (disorder);Transient ischemic attacks (disorder)|||C0007787|SNOMEDCT|||

TIA|intermittent cerebral ischemia|C0917805;C1521728|||C0917805|CHV|||

TIA|thin layer immunoassay|||1|0.0179|

TIA|thymidine incorporation assay|||1|0.0119|

TIA|trabecular-iris angle|||1|0.006|

TIA|trypsin inhibitor activity|C1152594|||1|0.0179|

TIA|tumor-induced angiogenesis|||1|

TIA|turbidimetric immunoassay|||1|0.0179|

TIBC|Serum Total Iron-Binding Capacity result;tibc|C0036835|||C0036835|CHV;MTH|||

TIBC|Serum iron and total iron binding capacity|||1|0.0753|

TIBC|total iron binding capacity;total iron-binding capacity|C0700379;C1283048|1|1|C0700379;C1283048|CHV;NCI;SNOMEDCT|1|0.9247|1

TIBC|total iron binding capacity (TIBC) test|||C0036835|CHV|||

TIMI|Thrombolysis in Myocardial Infarction trial|||1|0.0327|

TIMI|Thrombolysis in Myocardial Ischemia|||1|0.0184|

TIMI|thrombolysis in myocardial infarction||1|1.000||1|0.949|

TIPS|Portasystemic Shunt, Transjugular Intrahepatic;Portosystemic Shunt, Transjugular Intrahepatic;Shunt, Transjugular Intrahepatic Portasystemic;Shunt,

Transjugular Intrahepatic Portosystemic;Transjugular Intrahepatic Portasystemic  
 Shunt;Transjugular intrahepatic portosystemic shunt;transjugular intrahepatic  
 portosystemic shunt;transjugular intrahepatic portosystemic  
 shunting|C0339897;C1301416|1|1|C0339897;C1301416|LNC;MSH;MTHICD9;SNOMEDCT|1|0.95  
 49|1  
 TIPS|TIPS;TIPSS;Transjugular intrahepatic portosystemic shunt  
 (procedure);Transjugular intrahepatic portosystemic shunt  
 procedure|C0339897|||C0339897|MSH;MTH;MTHICD9;SNOMEDCT|||  
 TIPS|TIPS - Transjugular intrahepatic portosystemic  
 shunt|||C0339897|SNOMEDCT|||  
 TIPS|Tonoplast intrinsic proteins|||1|0.0109|  
 TIPS|transjugular intrahepatic portosystemic stent-shunt|||1|0.0342|  
 TIPS|transvenous intrahepatic portosystemic shunt|||1|  
 TKA|total knee arthroplasty|C0086511|1|1.000|C0086511|CHV;COSTAR|1|0.9871|1  
 TKA|total knee arthroscopy|||1|  
 TKA|transketolase activity|C1152029|||1|  
 TKA|trochanter-knee-ankle|||1|  
 TKA|tyrosine kinase activity|||1|0.0129|1  
 TLSO|thoracolumbar spinal orthosis|||1|  
 TLSO|thoracolumbosacral orthosis||1|1.000||1|  
 TMJ|Articulatio temporomandibularis;JAW JOINT;Jaw Joint;jaw  
 joint;Temporomandibular joint  
 structure|C0039493|||C0039493|CHV;FMA;NCI;SNOMEDCT;UWDA|||  
 TMJ|Costen Syndrome;Costen's Syndrome;Costen's syndrome;Costens  
 Syndrome;Syndrome, Costen's;costen syndrome;costen's syndrome;costens  
 syndrome;Jaw snapping;Snapping jaw;jaw snap;jaw snapping;jaw snaps;Joint  
 Syndrome, Temporomandibular;Syndrome, Temporomandibular Joint;TEMPOROMANDIBULAR  
 JOINT SYNDROME;Temporomandibular Joint Syndrome;Temporomandibular joint  
 syndrome;Temporomandibular joint syndrome, NOS;temporomandibular joint  
 syndrome;Mandibular dysfunction;mandibular dysfunction;Myofascial Pain  
 Dysfunction Syndrome, Temporomandibular Joint;Myofascial pain - dysfunction  
 syndrome of TMJ;PAIN-DYSFUNCTION SYNDROME;pain-dysfunction syndrome;Syndrome,  
 TMJ;TMJ SYNDROME;TMJ Syndrome;TMJ syndrome;syndrome tmj;tmj  
 syndrome;TEMPOROMANDIBULAR JOINT PAIN-DYSFUNCTION SYNDROME;TEMPOROMANDIBULAR  
 JOINT-PAIN-DYSFUNCTION SYNDROME;Temporomandibular joint pain dysfunction  
 syndrome;Temporomandibular joint-pain-dysfunction syndrome;TMJ-pain-dysfunction  
 syndrome;TMJPDS - Temporomandibular joint pain dysfunction  
 syndrome;Temporomandibular Joint Dysfunction;Temporomandibular Joint Dysfunction  
 Syndrome;dysfunction tmj;tmj dysfunction;temporomandibular dysfunction  
 syndrome|C0039496|||C0039496|CHV;COSTAR;CSP;DXP;MEDLINEPLUS;MSH;MTH;MTHICD9;NCI;  
 NDFRT;SNOMEDCT|||  
 TMJ|Costen's complex|||C0039496|SNOMEDCT|||  
 TMJ|Costen's syndrome (disorder)|||C0039496|SNOMEDCT|||  
 TMJ|Joint, Temporomandibular;Joints, Temporomandibular;Temporomandibular  
 Joint;Temporomandibular Joints;Temporomandibular joint;Temporomandibular joint,  
 NOS;Temporomandibular joints;temporomandibular joint;temporomandibular joint  
 (TMJ);tmj temporomandibular  
 joint|C0039493;C1269048|1|1|C0039493;C1269048|CHV;CSP;FMA;LCH;LNC;MSH;MTH;NCI;SN  
 OMEDCT;UWDA|1|0.9947|1  
 TMJ|TMD|||C0039496|MEDLINEPLUS|||  
 TMJ|TMJ|||C0039493;C0039496|CHV;DXP;MEDLINEPLUS;MSH;MTH;NCI|||  
 TMJ|Temporomandibular Joint Dysfunction Syndrome  
 [Disease/Finding]|||C0039496|NDFRT|||  
 TMJ|Temporomandibular joint dis.|||C0039496|SNOMEDCT|||  
 TMJ|Temporomandibular joint dysf.|||C0039496|SNOMEDCT|||  
 TMJ|Temporomandibular joint structure (body structure)|||C0039493|SNOMEDCT|||

TMJ|Temporomandibular joint-pain-dysfunction syndrome (disorder)|||C0039496|SNOMEDCT|||  
TMJ|Temporomandibular synd.|||C0039496|SNOMEDCT|||  
TMJ|Temporomandibular syndrome|||C0039496|SNOMEDCT|||  
TMJ|temporomandibular|||||1|0.0053|  
TM|Ear Drum;Ear drum;Ear drum, NOS;ear drum;Eardrum;Eardrums;eardrum;eardrums;Lateral wall of tympanic cavity;Membrana Tympanica;Membrana tympanica;Membranous wall of tympanic cavity;Paries membranaceus cavi tympani;Rivinus' membrane;Tympanic membrane structure|C0041445|||C0041445|AOD;CHV;CSP;FMA;MSH;MTH;NCI;SNOMEDCT;UWDA|||  
TM|Landsat Thematic Mapper|||||1|0.005|  
TM|Meditation, Transcendental;Transcendental Meditation;Transcendental meditation;transcendental Meditation;transcendental meditation|C0150814|||C0150814|AOD;MSH;MTH;NCI;SNOMEDCT|1|0.021|1  
TM|Membrane, Tympanic;Membranes, Tympanic;TYMPANIC MEMBRANE;Tympanic Membrane;Tympanic Membranes;Tympanic membrane;Tympanic membrane, NOS;tympanic membrane;tympanic membranes|C0041445;C1268971|1|1|C0041445|CHV;CSP;FMA;LCH;LNC;MSH;NCI;SNOMEDCT;UWDA|1|0.0605|1  
TM|Molybdate(2-), tetrathioxo-, (T-4)-|||C0076339|MSH|||  
TM|TKM;TURKMENISTAN;Turkmenistan;turkmenistan;Turkmen S.S.R.|C0041403|||C0041403|AOD;CHV;LCH;MSH;MTH;NCI;SNOMEDCT|||  
TM|TM|||C0040722;C0041403;C0041445;C0076339;C0150814|MSH;NCI;PDQ|||  
TM|TRANSM|||C0040722|MSH|||  
TM|TTM cpd;Tetrathiomolybdate;tetrathiomolybdate;Tetrathiomolybdic acid|C0076339|||C0076339|CHV;MSH;MTH;PDQ;SNOMEDCT|1|0.0073|  
TM|TX|||C0041403|NCI|||  
TM|Tamoxifen|C0039286|||||1|0.0037|  
TM|Tetrathiomolybdate (substance)|||C0076339|SNOMEDCT|||  
TM|Thayer-Martin|||||1|  
TM|Thrombotic microangiopathy|C2717961|||||1|0.0067|  
TM|Tibetan medicine|||||1|  
TM|Transcendental Meditation Therapy|C0150814;C0204530|||C0150814|NCI|||  
TM|Transcendental meditation (religion/philosophy)|||C0150814|SNOMEDCT|||  
TM|Tunicamycin;tunicamycin|C0041385|||C0041385|CHV;CSP;LCH;MSH;NDFRT|1|0.0383|  
TM|Turkmen SSR|||C0041403|MSH|||  
TM|Turkmenistan (geographic location)|||C0041403|SNOMEDCT|||  
TM|Tympanic membrane structure (body structure)|||C0041445|SNOMEDCT|||  
TM|alpha-tropomyosin|C0002317|||||1|0.006|  
TM|capacity|C1516240|||||1|0.0037|  
TM|disease transmission qualifier|C0040722|||C0040722|MTH|||  
TM|melting point|C1881775|||||1|0.0033|  
TM|melting temperature|||||1|0.0659|1  
TM|method|C0025663;C0449851;C0871511|||||1|0.003|  
TM|midpoint|||||1|0.003|  
TM|muscle|C0026845|||||1|0.0037|  
TM|neurons of the tuberomammillary|||||1|0.0007|  
TM|phase transition|C1257888|||||1|0.0023|  
TM|phase transition temperature|||||1|0.023|  
TM|seven-transmembrane|||||1|0.0037|  
TM|tail moment|||||1|0.0043|  
TM|tectorial membrane|C0039432;C1289393|||||1|0.0163|1  
TM|telangiectatic matting|||||1|  
TM|temperature by mouth|||||1|  
TM|temperature, muscle|||||1|  
TM|temporalis muscle|C0039487;C1275494|||||1|  
TM|temporomandibular|||||1|0.01|1

TM|teres major|1  
TM|term milk|1  
TM|testicular microlithiasis|C1864873|1|0.009|  
TM|thalassaemia major;thalassemia major|C0002875|1|0.017|1  
TM|thrombomodulin|C0145779;C0373785;C1420720|1|0.2079|1  
TM|thulium|C0040066|1  
TM|time and modifying|1  
TM|time motion|1  
TM|time required to complete M phase of cell cycle|1  
TM|timolol maleate|C0087093|1|0.0033|  
TM|tooth mobility|C0040445|1|0.0037|  
TM|trabecular meshwork|C0040573;C1281294|1|0.0619|1  
TM|trademark|C0282291|1  
TM|transformed migraine|C1960870|1|0.0057|  
TM|transgenic mice|C0025936|1|0.0037|  
TM|transitional mucosa|1|0.004|1  
TM|transmediastinal|1  
TM|transmembrane|C1167322;C2752508|1|0.2176|  
TM|transmembrane domain;transmembrane region|C1519623|1|0.0386|  
TM|transmembrane glycoprotein|C1415205|1|0.0043|  
TM|transmembrane protein|C0021699|1|0.009|  
TM|transmembrane segment|1|0.0126|  
TM|transmembrane subunit|1|0.003|  
TM|transmetatarsal|1  
TM|transmission|C0040722;C0242781;C1521797||C0040722|MSH||  
TM|transport maximum|1|0.0113|1  
TM|transport mechanism|1  
TM|transport medium|1  
TM|transverse myelitis|C0026976|1|0.008|1  
TM|treadmill|C0184069;C2712999|1|0.0143|1  
TM|trimester|C0032982|1  
TM|tropical medicine|C0041186|1  
TM|tropomyosin|C0041197|1|0.0549|  
TM|tuberculosis meningitis;tuberculous meningitis|C0041318|1|0.004|1  
TM|tuberomamillary nucleus|1|0.0027|  
TM|tuberomammillary nucleus|C0228377;C1289549|1|0.0077|  
TM|tubular maximal|1  
TM|tubular maximum|1  
TM|tubular myelin|C0077483|1|0.0033|1  
TM|tumor|C0027651;C1578706|1  
TM|tumor-bearing mice|1  
TM|tumour markers|C0041365;C1139415|1|0.0017|  
TM|tympanometric|1  
TOBI|Tobi;tobi;tobi [brand name]|C0723764||C0723764|CHV;RXNORM||  
TOBI|tobramycin|C0040341|1|1.000|1  
TOBI|tobramycin solution for inhalation|1  
TOBI|toxin binding inhibition|1|1|  
TPA|12 Myristoyl 13 acetylphorbol;12-Myristoyl-13-acetylphorbol;12 O  
Tetradecanoyl Phorbol 13 Acetate;12-O-Tetradecanoyl Phorbol 13-Acetate;13-  
Acetate, 12-O-Tetradecanoyl Phorbol;Phorbol 13-Acetate, 12-O-Tetradecanoyl;12-O-  
tetradecanoylphorbol 13-acetate;12-O-tetradecanoylphorbol-13-acetate;Acetate,  
Phorbol Myristate;Myristate Acetate, Phorbol;Phorbol Myristate Acetate;Acetate,  
Tetradecanoylphorbol;Tetradecanoylphorbol Acetate;tetradecanoylphorbol  
acetate;PMAS;tetradecanoyl phorbol  
acetate|C0039654||C0039654|CSP;MSH;MTH;NCI;NDFRT;PDQ|1|0.124|1  
TPA|12-O-Tetra-decanoylphorbol-13-acetate|1|0.0106|  
TPA|12-O-tetra-decanoyl-phorbol-13-acetate|1|0.0053|

TPA|12-O-tetradecanoyl-13-acetate|||||1|0.0095|  
 TPA|12-tetradecanoyl-phorbol-13-acetate|||||1|0.0071|  
 TPA|12-tetradecanoylphorbol-13-acetate|||||1|0.0065|  
 TPA|ALTEPLASE;Alteplase;alteplase;Plasminogen Activator, Tissue Type;Plasminogen Activator, Tissue-Type;Plasminogen activator tissue type;Tissue Type Plasminogen Activator;Tissue-Type Plasminogen Activator;Tissue-type plasminogen activator;Recombinant Tissue Plasminogen Activator;recombinant tissue plasminogen activator;T Plasminogen Activator;T-Plasminogen Activator;T-plasminogen activator;t-plasminogen activator;T-PA;t-PA;t-pa;T-PA - tissue-type plasminogen activator;TPA;Tpa;tPA;tpa;Tisokinase;Tissue Activator D 44;Tissue Activator D-44;Tissue plasminogen activator preparation;Tissue-type plasminogen activator preparation;r-tPA;rt-PA;rt-PA preparation;t-PA preparation|C0032143|||C0032143;C0039654;C1367601;C1623117;C1706149|CHV;CSP;GO;LNC;MSH;MTH;NCI;NDFRT;OMIM;PDQ;RXNORM;SNOMEDCT;VANDF|1|0.01|  
 TPA|ALTEPLASE, RECOMBINANT|||C0032143|NDFRT;VANDF|||  
 TPA|Activase|C0032143;C0701942|||C0032143|NCI|||  
 TPA|Alteplase (product)|||C0032143|SNOMEDCT|||  
 TPA|Alteplase (substance)|||C0032143|SNOMEDCT|||  
 TPA|Alteplase - chemical|||C0032143|SNOMEDCT|||  
 TPA|Alteplase - chemical (substance)|||C0032143|SNOMEDCT|||  
 TPA|PLASMINOGEN ACTIVATOR, TISSUE;Plasminogen Activator, Tissue;Tissue Plasminogen Activator;Tissue plasminogen activator;plasminogen activator, tissue;tissue plasminogen activator|C0032143;C1367601|1|0.998|C0032143;C1367601|CHV;CSP;HUGO;MSH;NCI;NDFRT;OMIM;SNOMEDCT|||1  
 TPA|PLAT|||C0032143;C1367601|HUGO;NCI;OMIM|||  
 TPA|PLAT Gene;PLAT gene;Plasminogen Activator, Tissue Gene|C1367601|||C1367601|HUGO;MTH;NCI|||  
 TPA|PLAT wt Allele;Plasminogen Activator, Tissue wt Allele|C1706149|||C1706149|MTH;NCI|||  
 TPA|PMA|C0039654;C0048451;C2825188|||C0039654|NCI;PDQ|||  
 TPA|PMA (phorbol myristate acetate)|||C0039654|CSP|||  
 TPA|Plasminogen Activator (Human Tissue-Type Protein Moiety)|||C0032143|NCI|||  
 TPA|T-plasminogen activator (substance)|||C0032143|SNOMEDCT|||  
 TPA|TPA (tetradecanoylphorbol acetate)|||C0039654|CSP|||  
 TPA|TPA (tissue plasminogen activator)|||C0032143|CSP|||  
 TPA|TTPA|C0032143;C1421223|||C0032143|MSH;NDFRT|||  
 TPA|Terephthalic acid|C0076117|||||1|0.0089|  
 TPA|Tetradecanoic acid, 9a-(acetyloxy)-1a,1b,4,4a,5,7a,7b,8,9,9a-decahydro-4a,7b-dihydroxy-3-(hydroxymethyl)-1,1,6,8-tetramethyl-5-oxo-1H-cyclopropa(3,4)benz(1,2-e)azulen-9-yl ester, (1aR-(1aalpha,1bbeta,4abeta,7aalpha,7balpha,8aalpha,9beta,9aalpha))-|||C0039654|MSH;NDFRT|||  
 TPA|Tetradecanoylphorbol Acetate [Chemical/Ingredient]|||C0039654|NDFRT|||  
 TPA|Tissue Plasminogen Activator [Chemical/Ingredient]|||C0032143|NDFRT|||  
 TPA|Tissue plasminogen activator (substance)|||C0032143|SNOMEDCT|||  
 TPA|Tissue plasminogen activator preparation (product)|||C0032143|SNOMEDCT|||  
 TPA|Tissue plasminogen activator preparation (substance)|||C0032143|SNOMEDCT|||  
 TPA|Treponema pallidum agglutination|||||1|  
 TPA|phorbol 12-myristate 13-acetate|||||1|0.0727|  
 TPA|phorbol diester|||||1|0.0041|  
 TPA|phorbol ester|C0031586|||||1|0.1229|  
 TPA|phorbol ester 12-O-tetradecanoylphorbol-13-acetate|||||1|0.01|  
 TPA|phorbol ester 12-O-tetradecanoyl-phorbol-13-acetate|||||1|0.0644|  
 TPA|phorbol ester 12-O-tetradecanoylphorbol-13-acetate|||||1|0.2014|  
 TPA|tannic acid, polyphosphomolybdic acid, and amido acid|||||1|

TPA|taurine-pyruvate aminotransferase activity;taurine:pyruvate aminotransferase activity|C1623117|||C1623117|GO;MTH|||  
 TPA|temporary portacaval anastomosis|||||||1  
 TPA|temporopolar artery|||||||1  
 TPA|tetradecanoylphorbol-13-acetate|||||1|0.0112|  
 TPA|texture profile analysis|||||1|0.0071|  
 TPA|third-party administrator|||||||1  
 TPA|thrombotic pulmonary artery|||||||1  
 TPA|time-resolved phosphorescence anisotropy|||||||1|0.0083|  
 TPA|tissue polypeptide antigen|C0076729|||C0076729|LNC;MSH;MTH;NDFRT;SNOMEDCT|||1  
 TPA|tissue type|C0019633;C2713035|||||1|0.0177|  
 TPA|tissue-type PA|||||||1|0.0892|  
 TPA|total parenteral alimentation|||||||1  
 TPA|total phobic anxiety|||||||1  
 TPA|tripropylamine|C0382766|||||1|0.0059|  
 TPA|tumor polypeptide antigen|||||||1  
 TPA|tumor promoter|C0041370|||||1|0.0059|  
 TPA|tumor promoter 12-O-tetradecanoyl-phorbol-13-acetate|||||||1|0.01|  
 TPA|tumor promoter 12-O-tetradecanoyl-phorbol-13-acetate|||||||1|0.0313|  
 TPA|tumor promoter 12-O-tetradecanoylphorbol-13-acetate|||||||1|0.1483|  
 TPA|two-photon absorption|||||||1|0.0077|  
 TPN|Adenosine 5'-(trihydrogen diphosphate), 2'-(dihydrogen phosphate), P'-5'-ester with 3-(aminocarbonyl)-1-beta-D-ribofuranosylpyridinium, inner salt|||C0027303|MSH;NDFRT|||  
 TPN|COENZYME A A 02|||C0027303|MSH|||  
 TPN|Central hyperalimentation;Hyperalimentation, Parenteral;Parenteral Hyperalimentation;Parenteral hyperalimentation;Nutrition, Total Parenteral;Parenteral Nutrition, Total;Total Parenteral Nutrition;Total parenteral nutrition;total parenteral nutrition;Parenteral infusion of concentrated nutritional substances;Superalimentation;Suralimentation;TPN (total parenteral nutrition);TPN - Total parenteral nutrition;total parenteral nutrition (TPN);TPN procedure;Total parenteral nutrition administration|C0030548|1|1|C0030548|CHV;CSP;ICD9CM;MSH;MTH;MTHICD9;NCI;SNOMEDCT|1|0.9815|1  
 TPN|Coenzyme II;Dinucleotide Phosphate, Nicotinamide-Adenine;Nicotinamide Adenine Dinucleotide Phosphate;Nicotinamide adenine dinucleotide phosphate;Nicotinamide-Adenine Dinucleotide Phosphate;Phosphate, Nicotinamide-Adenine Dinucleotide;nicotinamide adenine dinucleotide phosphate;nicotinamide-adenine dinucleotide phosphate;NAD phosphate;NAD(H) phosphate;NADH phosphate;NADP;nadp;NADPH;nadph;Nucleotide, Triphosphopyridine;Triphosphopyridine Nucleotide;triphosphopyridine nucleotide;nicotinamide adenine dinucleotide phosphate (NADP)|C0027303|||C0027303|AOD;CHV;CSP;MSH;MTH;NCI;NDFRT;SNOMEDCT|||1  
 TPN|Hyperalimentation;hyperalimentation|C0020505;C0030548;C1368829|||C0030548|CHV;MEDLINEPLUS;MTHICD9;NCI;SNOMEDCT|||  
 TPN|NADP [Chemical/Ingredient]||||C0027303|NDFRT|||  
 TPN|Nicotinamide adenine dinucleotide phosphate (substance)|||C0027303|SNOMEDCT|||  
 TPN|Parent infus nutrit sub|||C0030548|ICD9CM|||  
 TPN|TAP binding protein (tapasin)|||C1420583|HUGO|||  
 TPN|TAP-BINDING PROTEIN|||C1420583|OMIM|||  
 TPN|TAPA|C0617168;C1420583|||C1420583|HUGO|||  
 TPN|TAPASIN|C0664943;C1420583|||C1420583|OMIM|||  
 TPN|TAPBP;TAPBP gene;TPN;TPSN|C1420583|||C0027303;C0030548;C1420583|CHV;DXP;HUGO;LNC;MEDLINEPLUS;MSH;MTH;MTHICD9;NCI;OMIM;SNOMEDCT|||

TPN|Total parenteral nutrition (procedure)|||C0030548|SNOMEDCT|||  
 TPN|Total parenteral nutrition (regime/therapy)|||C0030548|SNOMEDCT|||  
 TPN|hyperalimentation therapy|C0030548;C0204706|||C0030548|CHV;CSP|||  
 TPN|parenteral alimentation|C0030547;C0030548;C0204706|||C0030548|CHV|||  
 TPN|parenteral nutrition|C0030547;C0030548|||C0030548|NCI|||  
 TPN|thalamic projection neuron|||||1  
 TPN|total parenteral|||||1|0.0025|  
 TPN|total parenteral nutrient|||||1|0.016|  
 TR|CD71||||C1619635|LNC;NCI|||  
 TR|CD71 Antigen;CD71 antigen;Lymphocyte antigen CD71;Transferrin Receptor Protein 1|C1619635|||C1619635|MSH;MTH;NCI;SNOMEDCT|||  
 TR|CF2R|C1366449;C1705939|||C1366449;C1705939|HUGO;NCI;OMIM|||  
 TR|COAGULATION FACTOR II RECEPTOR;F2R;PROTEASE-ACTIVATED RECEPTOR 1|C0668084;C1366449|||C1366449|HUGO;NCI;OMIM|||  
 TR|CT120.2;HPP1;HYPERPLASTIC POLYPOSIS GENE 1;TENB2;TMEFF2;TMEFF2 gene;TOMOREGULIN;tomoregulin;TPEF;cancer/testis antigen family 120, member 2;transmembrane protein TENB2|C1420775|||C1420775|HUGO;MTH;OMIM|||  
 TR|Coagulation Factor II (Thrombin) Receptor Gene||||C1366449|NCI|||  
 TR|Coagulation Factor II (Thrombin) Receptor wt Allele||||C1705939|NCI|||  
 TR|Country of Turkey;Turkey (country);Turkey - country|C0041400|||C0041400|CSP;MTH;SNOMEDCT|||  
 TR|F2R Gene;F2R gene|C1366449|||C1366449|HUGO;MTH;NCI|||  
 TR|F2R wt Allele|C1705939|||C1705939|MTH;NCI|||  
 TR|Lymphocyte antigen CD71 (substance)|||C1619635|SNOMEDCT|||  
 TR|PAR-1;PAR1|C1366449;C1414387|||C1366449;C1705939|HUGO;NCI;OMIM|||  
 TR|Repetition Time;repetition time;time to repetition|C2826099|||C2826099|MTH;NCI|1|0.1558|1  
 TR|SCARNA19;TELOMERASE RNA CANDIDATE 3;TERC Gene;TERC gene;Telomerase RNA Component Gene;small Cajal body-specific RNA 19|C1366448|||C1366448|HUGO;MTH;NCI;OMIM|||  
 TR|SELENOPROTEIN Z;selenoprotein Z;SELZ;THIOREDOXIN REDUCTASE, MITOCHONDRIAL;TRXR2;TXNRD2;TXNRD2 gene;thioredoxin reductase beta|C1425351|||C1425351|HUGO;MTH;OMIM|||  
 TR|T regulatory;regulatory T|||||1|0.0369|  
 TR|T9|C1179693;C1418972;C1619635|||C1619635|NCI|||  
 TR|TELOMERASE RNA COMPONENT;telomerase RNA component;hTR|C0935992;C1366448|||C1366448|HUGO;OMIM|||  
 TR|TERC|C0935992;C1366448;C1705312|||C1366448;C1705312|HUGO;NCI;OMIM|||  
 TR|TERC wt Allele;Telomerase RNA Component wt Allele|C1705312|||C1705312|MTH;NCI|||  
 TR|TFR||||C1619635|NCI|||  
 TR|TFR1;Transferrin Receptor 1|C1420708;C1619635|||C1619635|NCI|||  
 TR|TFRC;TRFR|C1420708;C1619635;C1705610|||C1619635|NCI|||  
 TR|THIOREDOXIN REDUCTASE 2;thioredoxin reductase 2|C1258336;C1425351|||C1425351|HUGO;OMIM|||  
 TR|THROMBIN RECEPTOR;thrombin receptor|C0076552;C0668084;C1366449|||C0076552;C0668084;C1366449|CSP;MSH;MTH;NCI;NDFRT;OMIM|||  
 TR|TR||||C0040733;C0041400;C0332121;C1366448;C1366449;C1420775;C1425351;C1619635;C1705312;C1705939;C2826099|HUGO;MSH;NCI;OMIM;SNOMEDCT|||  
 TR|TR-BETA|C0242469;C1425351|||C1425351|OMIM|||  
 TR|TR3||||C1425351|HUGO;OMIM|||  
 TR|TRANSMEMBRANE PROTEIN WITH EGF-LIKE AND 2 FOLLISTATIN-LIKE DOMAINS 2||||C1420775|OMIM|||  
 TR|TRANSPL||||C0040733|MSH|||  
 TR|TRC3|C1366448;C1705312|||C1366448;C1705312|HUGO;NCI;OMIM|||  
 TR|TU|C1532464;C2700314|||C0041400|NCI|||

TR|TUR|||C0041400|NCI|||  
TR|TURKEY;Turkey;turkey|C0041400;C0325628;C2348826|||C0041400|AOD;CHV;LCH;MSH;NCI|||  
TR|Texas red|C0076359|||1|0.0072|  
TR|Thiazin red|C0963609|||1|0.0043|  
TR|Thioredoxin reductase;thioredoxin reductase|C0039941||C0039941|CSP;MSH;NDFRT|1|0.058|1  
TR|Tiazofurin;tiazofurin|C0076656||C0076656|MSH;NCI;PDQ|1|0.013|  
TR|Transferrin Receptor;transferrin receptor|C0034845;C1420708;C1619635||C0034845;C1420708;C1619635|CHV;CSP;MSH;MTH;NCI;NDFRT;OMIM;SNOMEDCT|||  
TR|Treatment required for|||C0332121|MTH;SNOMEDCT|||  
TR|Treatment required for (contextual qualifier)|||C0332121|SNOMEDCT|||  
TR|Treatment required for (contextual qualifier) (qualifier value)|||C0332121|SNOMEDCT|||  
TR|Turkey - country (geographic location)|||C0041400|SNOMEDCT|||  
TR|Turnover rates;turnover rate|||1|0.0043|1  
TR|coagulation factor II (thrombin) receptor|||C1366449|HUGO|||  
TR|human transferrin receptor|||1|0.008|  
TR|p90|C1413107;C1537472;C1619635||C1619635|NCI|||  
TR|ratio|C0456603;C1547037|||1|0.0145|  
TR|recovery time|||1|  
TR|rectal temperature|C0489749||C0489749|CHV;SNOMEDCT|1|0.0486|1  
TR|recurrence|C0034897;C1458156;C2825055|||1|0.0065|  
TR|repetition|C0205341|||1|0.0101|  
TR|residual tuberculin|||1|  
TR|resistance|C0237834;C1514892|||1|0.0109|  
TR|resistant|C0332325;C2827757|||1|0.0065|  
TR|response|C0871261;C1704632;C1706817;C2911692|||1|0.0101|  
TR|retention times|||1|0.0058|  
TR|tandem repeat|C0039290||C0039290|CHV;MSH|1|0.0116|  
TR|taste reactivity|||1|0.013|  
TR|temperature-resistant|||1|0.0065|  
TR|terminal repeat|C0039551||C0039551|MSH|1|0.0268|1  
TR|tetrazolium reduction|||1|  
TR|therapeutic radiology|C0243004;C0243005;C1522449||C0243004;C0243005;C1522449;C1555882|CCS;HL7V3.0;MSH;NCI;SNOMEDCT|||1  
TR|therapeutic reaction|||1|  
TR|therapeutic recreation|C0034873|||1|  
TR|thyroid hormone|C0040135|||1|0.0101|  
TR|thyroid hormone receptor|C0034843||C0034843|CHV;MSH;MTH;NCI;NDFRT;SNOMEDCT|1|0.2333|1  
TR|time to repeat|||1|  
TR|time-resolved|||1|0.0065|  
TR|timed release|||1|  
TR|tincture|C0991583|||1|  
TR|to return|||1|  
TR|total repair|||1|  
TR|total resistance|||1|  
TR|total response|||1|  
TR|trace|C0442822;C1883002|||1|  
TR|trachea|C0040578;C1278905;C3146235||C0040578;C0040580;C1278905;C3146235|AOD;CHV;CSP;CST;FMA;LCH;LNC;MSH;MTH;NCBI;NCI;SNOMEDCT;UWDA|1|0.0065|1  
TR|trained;training|C0040607;C0220931;C2673163||C0040607;C0220931;C1554161;C2673163|CSP;HL7V2.5;HL7V3.0;MSH;MTH;NCI;SNOMEDCT|1|0.0312|

TR|transferrin|C0040679;C1442762|||C0040679;C0202105;C1442762|AOD;CHV;CSP;HUGO;L  
 CH;LNC;MSH;MTH;NCI;NDFRT;OMIM;SNOMEDCT|1|0.0116|  
 TR|transfusion reaction|C0274435|||||1  
 TR|transitional region|C1704529|||||1|0.0051|  
 TR|transmembrane protein with EGF-like and two follistatin-like domains  
 2||||C1420775|HUGO|||  
 TR|transplant recipient|C0376387|||||1  
 TR|transplantation|C0029216;C0040732;C0040733|||C0040733|MSH|||  
 TR|transplantation aspects|C0040733|||C0040733|MTH|||  
 TR|transport rate|||||1|0.0116|  
 TR|transrectal|C0205518|||||1  
 TR|transverse relaxation|||||1  
 TR|trapezius|C0224361;C1305027|||||1|0.0072|  
 TR|treadmill running|||||1|0.0109|  
 TR|treatment|C0039798;C0087111;C1522326;C1533734;C1705169;C3161471|||||1  
 TR|trembler|||||1|0.0116|  
 TR|tremor|C0040822;C1963252|||C0040822;C1963252|AOD;CHV;COSTAR;CSP;CST;DXP;LCH;M  
 EDLINEPLUS;MSH;MTH;NCI;NDFRT;OMIM;SNOMEDCT|||1  
 TR|trenimon|C0917860|||C0917860|MSH|||  
 TR|triamcinolone|C0040864|||C0040864|CHV;CSP;LCH;LNC;MSH;NCI;NDFRT;PDQ;RXNORM;SN  
 OMEDCT;USPMG;VANDF|||  
 TR|tricuspid regurgitation|C0040961|1|1.000|||1|0.1543|1  
 TR|triiodothyronine receptor|||||1  
 TR|triradial|||||1  
 TR|trp repressor|C0077443|||||1|0.0043|  
 TR|true reading|||||1  
 TR|trypanothione reductase|C0077419|||||1|0.0304|  
 TR|trypsin|C0041236|||C0041236|AOD;CHV;CSP;LCH;LNC;MSH;MTH;MTHSPL;NCI;NDFRT;RXNO  
 RM;SNOMEDCT;SPN;VANDF|1|0.0065|  
 TR|tuberculin Ruckland|||||1  
 TR|tuberculin residue|||||1  
 TR|tubular resorption|||||1  
 TR|tumor registry|C1976635|||||1  
 TR|turbidity reducing|||||1  
 TSH|Hormone, Thyroid-Stimulating;Thyroid Stimulating Hormone;Thyroid stimulating  
 hormone;Thyroid-Stimulating Hormone;thyroid stimulating hormone;thyroid-  
 stimulating hormone;TSH (Thyroid Stimulating Hormone);TSH - Thyroid stimulating  
 hormone;thyroid stimulating hormone  
 (TSH)|C0040160;C0696098;C1535531|1|1|C0040160;C0202230|CHV;CSP;MSH;MTH;NCI;NDFRT  
 ;PDQ;SNOMEDCT|1|0.5193|1  
 TSH|TSH|||C0040160;C0202230|CHV;CSP;NCI;SNOMEDCT|||  
 TSH|TSH - Thyroid stimulating hormone level;TSH - thyroid stimulating hormone (&  
 level);TSH level;TSH measurement;Thyroid Stimulating Hormone Measurement;Thyroid  
 stimulating hormone measurement;Thyrotropin Measurement;Thyrotropin  
 measurement;Thyrotropin stimulating hormone  
 measurement|C0202230|||C0202230|MTH;NCI;SNOMEDCT|||  
 TSH|TSH - thyroid stim. hormone|||C0202230|SNOMEDCT|||  
 TSH|TSH - thyroid stimulating hormone (& level)  
 (procedure)|||C0202230|SNOMEDCT|||  
 TSH|TSH preparation;Thyreotropin;Thyrotrophin product;Thyrotropic hormone  
 preparation;thyrotropic  
 hormone|C0040160|||C0040160|CHV;MSH;NCI;NDFRT;SNOMEDCT|||  
 TSH|Thyroid Stimulating Hormone [EPC]|C0040160;C2825077|||C0040160|NDFRT|||  
 TSH|Thyroid stimulating hormone (& level);Thyroid stimulating hormone  
 level|C0202230;C0428414|||C0202230|SNOMEDCT|||  
 TSH|Thyroid stimulating hormone (& level) (procedure)|||C0202230|SNOMEDCT|||  
 TSH|Thyroid stimulating hormone (substance)|||C0040160|SNOMEDCT|||

TSH|Thyroid stimulating hormone measurement (procedure)|||C0202230|SNOMEDCT|||  
TSH|Thyrotrophic hormone product|||C0040160|SNOMEDCT|||  
TSH|Thyrotrophin;Thyrotropin;thyrotrophin;thyrotropin|C0040160;C1535531|||C0040160;C0202230|AOD;CHV;CSP;FMA;LCH;LNC;MSH;MTH;NCI;NDFRT;PDQ;RXNORM;SNOMEDCT;UWDA|1|0.4623|  
TSH|Thyrotrophin product (product)|||C0040160|SNOMEDCT|||  
TSH|Thyrotrophin product (substance)|||C0040160|SNOMEDCT|||  
TSH|Thyrotropic hormone preparation (product)|||C0040160|SNOMEDCT|||  
TSH|Thyrotropic hormone preparation (substance)|||C0040160|SNOMEDCT|||  
TSH|Thyrotropin [Chemical/Ingredient]|||C0040160|NDFRT|||  
TSH|anti-thyrotropin|||1|0.0025|  
TSH|gene teashirt|||1|0.0015|  
TSH|serum thyrotrophin|||1|0.0081|  
TSH|temperature-sensitive hemagglutinin|||1|0.0019|  
TSH|thyroid stimulating hormone (TSH) test|||C0202230|CHV|||  
TSH|thyrotropic|||1|0.0023|  
TSH|thyrotropine|||1|0.0021|  
TTP|2'-deoxythymidine-5'-triphosphate;Deoxythymidine triphosphate;deoxythymidine triphosphate;Thymidine triphosphate;thymidine triphosphate;dTTP;thymidine 5'-triphosphate|C0076582|||C0076582|CSP;MSH;MTH;SNOMEDCT|1|0.0099|1  
TTP|A DISINTEGRIN-LIKE AND METALLOPROTEASE WITH THROMBOSPONDIN TYPE 1 MOTIF, 13|||C1413036|OMIM|||  
TTP|ADAM metallopeptidase with thrombospondin type 1 motif, 13|||C1413036|HUGO|||  
TTP|ADAMTS13;ADAMTS13 gene;DKFZp434C2322;FLJ42993;MGC118899;MGC118900;VWF-CP|C1413036|||C1413036|HUGO;MTH;OMIM|||  
TTP|Congenital Thrombotic Thrombocytopenic Purpura;THROMBOTIC THROMBOCYTOPENIC PURPURA, CONGENITAL;Thrombotic Thrombocytopenic Purpura, Congenital;Familial Thrombotic Microangiopathies;Familial Thrombotic Microangiopathy;Microangiopathies, Familial Thrombotic;THROMBOTIC MICROANGIOPATHY, FAMILIAL;Thrombotic Microangiopathies, Familial;Thrombotic Microangiopathy, Familial;MICROANGIOPATHIC HEMOLYTIC ANEMIA, CONGENITAL;SCHULMAN-UPSHAW SYNDROME;Schulman Upshaw Syndrome;Schulman-Upshaw Syndrome;Syndrome, Schulman-Upshaw;Syndrome, Upshaw-Schulman;UPSHAW-SCHULMAN SYNDROME;Upshaw Schulman Syndrome;Upshaw-Schulman Syndrome;Upshaw-Schulman syndrome;USS|C1268935|||C1268935|MSH;MTH;OMIM;SNOMEDCT|||  
TTP|Deoxythymidine triphosphate (substance)|||C0076582|SNOMEDCT|||  
TTP|Disease, Moschcowitz;Moschcowitz Disease;Disease, Moschkowitz;Moschkowitz Disease;MOSCHCOWITZ SYNDROME;Moschcowitz syndrome;Moschcowitz's syndrome;moschcowitz's syndrome;Moschowitz Disease;PURPURA THROMBOPENIC THROMBOTIC;Purpura, Thrombotic Thrombopenic;Purpuras, Thrombotic Thrombopenic;Thrombopenic Purpura, Thrombotic;Thrombopenic Purpuras, Thrombotic;Thrombotic Thrombopenic Purpura;Thrombotic Thrombopenic Purpuras;thrombotic thrombopenic purpura;PURPURA, THROMBOCYTOPENIC, THROMBOTIC;Purpura, Thrombotic Thrombocytopenic;Purpuras, Thrombotic Thrombocytopenic;THROMBOTIC THROMBOCYTOPENIC PURPURA;Thrombocytopenic Purpura, Thrombotic;Thrombocytopenic Purpuras, Thrombotic;Thrombotic Thrombocytopenic Purpura;Thrombotic Thrombocytopenic Purpuras;Thrombotic thrombocytopenic purpura;thrombotic thrombocytopenic purpura;PURPURA, THROMBOHEMOLYTIC;TTP - Thrombotic thrombocytopenic purpura;thrombotic thrombocytopenic purpura (TTP)|C0034155|1|1|C0034155|CHV;COSTAR;CST;DXP;MSH;MTH;MTHICD9;NCI;NDFRT;QMR;SNOMEDCT|1|0.6341|1  
TTP|Familial TTP/HUS|||C1268935|SNOMEDCT|||  
TTP|Familial thrombotic thrombocytopenic purpura / haemolytic uraemic syndrome;Familial thrombotic thrombocytopenic purpura / hemolytic uremic syndrome|||C1268935|SNOMEDCT|||

TTP|G0S24;NUP475;RNF162A;TIS11;ZFP36;ZFP36  
gene|C1421571|||C1421571|HUGO;MTH;OMIM|||  
TTP|MICROANGIOPATHIC HEMOLYTIC ANEMIA|C0221021;C1268935|||C1268935|OMIM|||  
TTP|MOSCHKOWITZ DIS|||C0034155|MSH|||  
TTP|Moschowitz's syndrome|C0034155;C2584778|||C0034155|SNOMEDCT|||  
TTP|Purpura, Thrombotic Thrombocytopenic [Disease/Finding]|||C0034155|NDFRT|||  
TTP|TRISTETRAPROLIN|C0084795;C1421571|||C1421571|OMIM|||  
TTP|TTP;ttp;Time to Progression;Time to progression;time to  
progression|C2985467|||C0034155;C0076582;C1268935;C1413036;C1421571;C2985467|CHV  
;DXP;HUGO;MSH;MTH;NCI;OMIM;SNOMEDCT|1|0.1821|1  
TTP|Testicular Tumor Panel|||1|1|0.0066|  
TTP|Thrombotic thrombocytopenic purpura (disorder)|||C0034155|SNOMEDCT|||  
TTP|Thrombotic thrombocytopenic purpura [Ambiguous]|||C0034155|SNOMEDCT|||  
TTP|Tolpa Torf Preparation|C0248452|||1|1|0.0066|  
TTP|UPSHAW FACTOR, DEFICIENCY OF;Upshaw Factor, Deficiency  
of|||C1268935|MSH;OMIM|||  
TTP|Upshaw-Schulman syndrome (disorder)|||C1268935|SNOMEDCT|||  
TTP|VON WILLEBRAND FACTOR-CLEAVING PROTEASE|C0389918;C1413036|||C1413036|OMIM|||  
TTP|ZINC FINGER PROTEIN 36, MOUSE, HOMOLOG OF|||C1421571|OMIM|||  
TTP|protein tristetraproline|||1|1|0.0083|  
TTP|temporary transvenous pacemaker|||1|1|1|0.0066|  
TTP|tender to palpation|||1|1|1|0.0124|  
TTP|tender to pressure|||1|1|1|0.0248|1  
TTP|thiamin triphosphate;thiamine triphosphate|C0039853|||1|1|0.0183|  
TTP|thymidine 5'-(tetrahydrogen triphosphate)|||C0076582|MSH|||  
TTP|thymidine 5'-triphosphate (TTP)|||C0076582|CHV|||  
TTP|thyrotoxic paralysis|||1|1|1|0.053|1  
TTP|time to peak|C2923471|||C2923471|LNC|1|1|0.053|1  
TTP|time to peak contraction|||1|1|1|0.0066|  
TTP|time to peak tension|||1|1|1|0.0124|  
TTP|time to pregnancy|||1|1|1|0.0248|1  
TTP|time to tumor progression|||1|1|1|0.0439|1  
TTP|transtrabecular plane|||1|1|1|0.0483|  
TTP|transtuberular plane|C0458356|||1|1|1|0.0483|  
TTP|zinc finger protein 36, C3H type, homolog (mouse)|||C1421571|HUGO|||  
TURP|Endoscopic prostatectomy;Endoscopic resection of prostate;Loop  
prostatectomy;Prostate Resection, Transurethral;Prostate Resections,  
Transurethral;Prostate Transurethral Resection;Prostate Transurethral  
Resections;Resection, Transurethral Prostate;Resections, Transurethral  
Prostate;Transurethral Prostate Resection;Transurethral Prostate  
Resections;Transurethral Resection of Prostate;Transurethral Resection of the  
Prostate;Transurethral resection of prostate;transurethral prostate  
resection;transurethral resection of prostate;transurethral resection of the  
prostate;Prostatectomies, Transurethral;Prostatectomy,  
Transurethral;TRANSURETHRAL PROSTATECTOMY;Transurethral  
Prostatectomies;Transurethral Prostatectomy;Transurethral  
prostatectomy;Transurethral prostatectomy NOS;Transurethral prostatectomy,  
NOS;transurethral prostatectomy;TUR of prostate;TUR of prostate,  
NOS;TURP;TURPs;turp;TURP - Transurethral resection of prostate;Transurethral  
resection of prostate (TURP);transurethral resection of prostate  
(TURP);Transurethral Prostatic Resection;transurethral prostatic  
resection|C0040771|1|1|C0040771|CCS;CHV;COSTAR;ICD9CM;LCH;MSH;MTH;MTHICD9;NCI;SN  
OMEDCT|1|0.9516|1  
TURP|TURP (transurethral resection of prostate gland)|||C0040771|CSP|||  
TURP|Transurethral prostatectomy (procedure)|||C0040771|SNOMEDCT|||  
TURP|transurethral resection|C1519630|||1|1|0.0483|

TV|Ellice Islands;TUV;TUVALU;Tuvalu;Tuvala|C0041413|||C0041413|AOD;MSH;MTH;NCI;SNOMEDCT|||  
 TV|TV;t.v.;tv|C0039461;C0040210|||C0039461;C0041413;C1704705|AOD;CHV;NCI|||  
 TV|Tacaribe virus|C1304600|||1|0.0235|  
 TV|Television;Televisions;television;televisions|C0039461|||C0039461|AOD;CHV;CSP;LCH;MSH;MTH;SNOMEDCT|1|0.2549|1  
 TV|Television (physical object)|||C0039461|SNOMEDCT|||  
 TV|Tellina virus|C1653138|||1|1  
 TV|Thermoactinomyces vulgaris|C0318210|||1|1  
 TV|Trial Visits;trial visit|||C1704705|NCI|||1  
 TV|Trial Visits Domain|||C1704705|MTH;NCI|||  
 TV|Trichomonas vaginalis|C0040922|||1|0.1373|1  
 TV|Tuvala (geographic location)|||C0041413|SNOMEDCT|||  
 TV|talipes varus|C0158722|||1|1  
 TV|target volume|||1|1  
 TV|temporary visit|||1|1  
 TV|tetrazolium violet|C2603970|||1|1  
 TV|thoracic vertebra|C0039987;C1269050|||1|1  
 TV|thyroid volume|||1|1  
 TV|tick-borne virus|C0206549|||1|1  
 TV|tidal volume|C0040210|1|0.014|||1|0.251|1  
 TV|tonic vergence|||1|1  
 TV|total volume|||1|1  
 TV|toxic vertigo|||1|1  
 TV|transfer vesicle|||1|1  
 TV|transvaginal|C0175672|||1|0.051|1  
 TV|transvenous|C0522521|||1|1  
 TV|transverse|C0205106;C0446380|||1|1  
 TV|tricuspid valve|C0040960;C1269006|||1|0.1843|1  
 TV|trivalent|||1|1  
 TV|true vertebra|||1|1  
 TV|truncal vagotomy|C0042275|||1|0.098|1  
 TV|tuberculin volutin|||1|1  
 TV|tubulovesicular|||1|1  
 TV|tumor virus|C0029017|||1|1  
 TV|typhoid vaccine|C0041469|||1|1  
 UA|Laboratory: urine examination|||C0042014|AIR|||  
 UA|UA|C0041580;C0042014|||C0041580;C0042014|LNC;NCI|||  
 UA|UKR;UKRAINE;Ukraine;ukraine|C0041580|||C0041580|AOD;CHV;CSP;LCH;MSH;MTH;NCI;SNOMEDCT|||  
 UA|UP|||C0041580|NCI|||  
 UA|Ukraine (geographic location)|||C0041580|SNOMEDCT|||  
 UA|Ulex agglutinin|||1|1  
 UA|Urinalyses;Urinalysis;Urinalysis, NOS;urinalyses;urinalysis;Urinalysis (procedure);Urinalysis Procedures;Urinalysis procedure;Urinalysis procedure, NOS;Urine examination;examination urine;urine examination;Urine test NOS (procedure);procedures test urine;urine test procedure;analysis urine;urine analysis;testings  
 urine|C0042014|1|1|C0042014|AOD;CHV;CSP;LNC;MSH;MTH;MTHCH;NCI;SNOMEDCT|1|0.0174|1  
 UA|Urinalysis - general|||C0042014|SNOMEDCT|||  
 UA|Urinalysis studies|||C0042014|LNC|||  
 UA|Urine exam. - general;Urine exam. - general NOS;general urine exam|C0042014;C0205246;C1553889|||C0042014|CHV;SNOMEDCT|||  
 UA|Urine exam. - general NOS (procedure)|||C0042014|SNOMEDCT|||  
 UA|Urine examination (procedure)|||C0042014|SNOMEDCT|||

UA|Urine examination - general;Urine examination - general  
NOS|||C0042014|SNOMEDCT|||  
UA|Urine examination - general (procedure);Urine examination - general NOS  
(procedure)|||C0042014|SNOMEDCT|||  
UA|Urine test;Urine test NOS;test urine;tested urine;testing urine;tests  
urine;urine test|C0042014;C1263430|||C0042014|CHV;SNOMEDCT|||  
UA|activity|C0026606;C0205177;C0439167;C0441655;C1561536|||1|0.0105|  
UA|aldosterone|C0002006|||1|0.0105|  
UA|ultraaudible|||1|  
UA|ultrasonic arteriogram|||1|  
UA|ultrasonic arteriograph|||1|  
UA|ultrasonic arteriography|||1|  
UA|umbilical arterial|||1|0.0233|  
UA|umbilical  
artery|C0041632;C1280618|||C0041632;C1280618|CHV;FMA;LNC;MSH;NCI;SNOMEDCT;UWDA|1  
|0.1826|1  
UA|unaggregated|||1|  
UA|unauthorized absence|||1|  
UA|uncertain about|||1|  
UA|undifferentiated arthritis|||1|0.0198|  
UA|unicystic ameloblastoma|C0457521|||1|  
UA|unit of analysis|||1|  
UA|unrelated apart|||1|  
UA|unstable angina;unstable angina  
pectoris|C0002965|||C0002965|CHV;MSH;MTHICD9;NCI;NDFRT;SNOMEDCT|1|0.2919|1  
UA|upper airway;upper airways|||1|0.1163|1  
UA|upper arm|C0446516;C1269612|||C0446516;C1269612|AOD;CHV;LNC;MTH;SNOMEDCT|||1  
UA|uranyl acetate|C0077854|||C0077854|MSH|1|0.0174|  
UA|urethra|C0041967;C1281574;C1550675|||1|  
UA|uric  
acid|C0041980;C0202239|||C0041980;C0202239|AOD;CHV;LCH;MSH;MTH;NCI;NDFRT;SNOMEDC  
T|1|0.286|1  
UA|uridylic acid|C0042002|||C0042002|CHV;MSH;NDFRT;SNOMEDCT|||  
UA|urinalysis|||C0042014|CHV|||  
UA|urinary aldosterone|C0852887|||C0852887|CHV|||1  
UA|urinary amylase|||1|0.0128|  
UA|urine aliquot|||1|  
UA|urine analysis|||C0042014|CHV|||  
UA|urocanic acid|C0042054|||1|  
UA|uronic acid|C0042081|||C0042081|SNOMEDCT|||  
UA|ursolic acid|C0077938|||C0077938|CHV;MSH|||  
UA|uterine arteries;uterine  
artery|C0226378;C1280153|||C0226378;C1280153|CHV;FMA;LNC;MSH;SNOMEDCT;UWDA|1|0.0  
116|1  
UA|uterine aspiration|||1|  
UC|Uldall catheter|||1|  
UC|University of California|||1|0.0607|  
UC|controls|||1|0.0364|  
UC|ulcerative  
colitis|C0009324|1|0.016|C0009324|AIR;AOD;CHV;COSTAR;CSP;CST;ICD9CM;MEDLINEPLUS;  
MSH;MTH;NCI;NDFRT;OMIM;QMR;SNOMEDCT|1|0.0364|1  
UC|ultracentrifugal|||1|  
UC|ultracentrifugation|C0041609|||C0041609|AOD;CSP;MSH;SNOMEDCT|1|0.0526|  
UC|umbilical cholesterol|||1|  
UC|umbilical  
cord|C0041633;C1281286|||C0041633;C1281286|AOD;CHV;CSP;FMA;LCH;LNC;MSH;NCI;SNOME  
DCT|1|0.1377|1

UC|unchanged|C0442739;C2346711|||||1  
 UC|unclassifiable|||||1  
 UC|unconscious|C0041657|||||1  
 UC|undifferentiated  
 carcinoma|C0205698|||C0205698|CHV;MSH;MTH;NCI;SNOMEDCT|1|0.0486|1  
 UC|undifferentiated cells|||||1  
 UC|unesterified cholesterol|C0368909|||C0368909|SNOMEDCT|1|0.17|  
 UC|unfixed cryostat|||||1  
 UC|universal coverage|C0376640|||C0376640|MSH|||  
 UC|unsatisfactory condition|||||1  
 UC|untreated cell|||||1  
 UC|urea clearance|C0428604;C1318428|||||1  
 UC|urethral catheter|C0179800|||||1  
 UC|urethral catheterization|C0042019;C1455681|||||1  
 UC|urgent care|C1552460;C2362545|1|0.002|||||  
 UC|urinary catheter|C0179802|||||1  
 UC|urinary catheterization|C0042019|||||1  
 UC|urine concentrate|||||1  
 UC|urine culture|C0430404|1|0.974|||||1  
 UC|urothelial carcinoma|C0007138|||C0007138|CHV;NCI;SNOMEDCT|1|0.0526|  
 UC|usual care|||||1|0.3563|1  
 UC|uterine contraction;uterine  
 contractions|C0042130|||C0042130|CHV;DXP;MSH;NCI;SNOMEDCT|1|0.0486|1  
 URI|C19orf2;C19orf2 gene;FLJ10575;NNX3 PROTEIN;UNCONVENTIONAL PREFOLDIN RPB5  
 INTERACTOR;unconventional prefoldin RPB5 interactor;chromosome 19 open reading  
 frame 2|C1421895|||C1421895|HUGO;MTH;OMIM|||  
 URI|INFECT UPPER RESPIRATORY;UPPER RESPIRATORY INFECT|||C0041912|MSH|||  
 URI|INFECTION UPPER RESPIRATORY;Infections, Upper Respiratory;Respiratory  
 Infection, Upper;UPPER RESPIRATORY INFECTION;Upper Respiratory Infections;Upper  
 respiratory infection;Upper respiratory infection NOS;Upper respiratory  
 infection, NOS;upper respiratory infection;upper respiratory  
 infections;INFECTION, UPPER RESPIRATORY TRACT;Infection of the upper respiratory  
 tract;Infections, Upper Respiratory Tract;Upper Respiratory Tract  
 Infection;Upper Respiratory Tract Infections;Upper respiratory tract  
 infection;Upper respiratory tract infection NOS;Upper respiratory tract  
 infections;upper respiratory tract infection;UPPER RESP TRACT INFECTION;URI -  
 Upper respiratory infection;upper respiratory infection (URI);URTI - Infection  
 of the upper respiratory tract;upper respiratory tract infection  
 (URTI)|C0041912|1|1|C0041912|CHV;COSTAR;CST;DXP;MSH;MTH;MTHICD9;NCI;OMIM;SNOMEDC  
 T|1|0.9143|1  
 URI|Infection of the upper respiratory tract (disorder)|||C0041912|SNOMEDCT|||  
 URI|NNX3|C1421895;C1708129|||C1421895|HUGO;OMIM|||  
 URI|RMP|C1412063;C1421895;C1708129|||C1421895|HUGO;OMIM|||  
 URI|RNA POLYMERASE II, SUBUNIT 5-MEDIATING PROTEIN|||C1421895|OMIM|||  
 URI|RPB5-MEDIATING PROTEIN|||C1421895|OMIM|||  
 URI|URI|C0041912;C1421895;C1548524|||C0041912;C1421895;C1548524|DXP;HUGO;NCI;OMI  
 M|||  
 URI|Uniform Resource Identifier|C1548524|||C1548524|HL7V2.5;MTH;NCI|||  
 URI|Upper respiratory infection (disorder);Upper respiratory infection NOS  
 (disorder)|||C0041912|SNOMEDCT|||  
 URI|common cold|C0009443;C0041912|||C0041912|CHV|||  
 URI|upper respiratory illness|||||1|0.0857|  
 US|California|C0006754;C0324542;C3146274|||||1|0.0015|  
 US|Diagnosis (US)|||C0041618|NCI|||  
 US|Diagnosis, Ultrasound;General ultrasound;Imaging, Ultrasonic;Ultrasonic  
 Imaging;ultrasonic imaging;Imagings, Ultrasonic;Ultrasonic Imagings;Medical  
 Imaging, Ultrasound;Medical Sonography;Sonography,

Medical;Sonogram;sonogram;sonograms;US - Ultrasound;USS - Ultrasound scan;Ultrasonogram;ultrasonogram;Ultrasound Test;testing ultrasound;tests ultrasound;ultrasound test;Ultrasound procedure;Ultrasound procedure, NOS;procedure ultrasound;ultrasound procedure;Ultrasound scan;Ultrasound scan, NOS;scan ultrasound;scans ultrasound;ultrasound scan;ultrasound scanning;Ultrasound, Medical;diagnostics ultrasound;sonography;sound measurement|C0041618|||C0041618|AOD;CHV;CSP;LNC;MEDLINEPLUS;MSH;NCI;SNOMEDCT|1|0.0215|

US|Diagnostic Ultrasound;Diagnostic ultrasound;diagnostic ultrasound;ultrasound diagnostic|||C0041618|CCS;CHV;CSP;ICD9CM;NCI|||

US|Diagnostic Ultrasound Procedures;Ultrasound diagnostic procedure;ultrasound diagnostic procedure|||C0041618|CHV;MTHCH;SNOMEDCT|||

US|Diagnostic sonar|||C0041618|SNOMEDCT|||

US|Diagnostic ultrasonography;Diagnostic ultrasonography, NOS|||C0041618|SNOMEDCT|||

US|Diagnostic ultrasonography (procedure)|||C0041618|SNOMEDCT|||

US|ECHOGR|||C0041618|MSH|||

US|ECHOTOMOGR|||C0041618|MSH|||

US|Echography;Echography, NOS;echographies;echography;Echotomographies;Echotomography;echotomography|C0041618;C0175676|||C0041618;C0175676|AOD;CHV;MSH;SNOMEDCT|||

US|Echography (procedure)|||C0041618|SNOMEDCT|||

US|GEN.US|||C0041618|LNC|||

US|Microsecond;microsecond|C0439224|||C0439224|MTH;NCI;SNOMEDCT|||

US|U S;U.S.;UNITED STATES;United States;USA;USA - United States of America;United States of America|C0041703|1|0.804|C0041703|AOD;CHV;CSP;HL7V3.0;LCH;MSH;MTH;NCI;SNOMEDCT|1|0.0538|

US|U.S.A.;u s a;u.s.a.||||C0041703|AOD;CHV|||

US|ULTRASONOGR|||C0041618;C0175676|MSH|||

US|ULTRASOUND;Ultrasound;ultrasound;ultrasounds|C0041618;C0041621;C0220934;C1456803;C1875843|1|0.188|C0041618;C0041621;C0220934;C1456803;C1875843|AOD;CHV;CSP;HL7V2.5;HL7V3.0;MEDLINEPLUS;MSH;NCI;NDFRT;SNOMEDCT;VANDF|1|0.4581|1

US|US;us|||C0041618;C0041703;C0175676;C0439224|AOD;LNC;MSH;NCI;SNOMEDCT|||

US|Ultrasonography;Ultrasonography, NOS;ultrasonography|C0041618;C0162481;C0175676|||C0041618;C0162481;C0175676|AOD;CHV;CSP;MSH;MTH;NCI;PDQ;SNOMEDCT|1|0.3175|1

US|Ultrasonography (procedure)|||C0041618|SNOMEDCT|||

US|Ultrasound Imaging;imaging ultrasound;ultrasound imaging|C0041618;C0701813|||C0041618|CHV;CSP;NCI|1|0.0013|

US|Ultrasound diagnostic procedure (procedure)|||C0041618|SNOMEDCT|||

US|Ultrasound procedure (procedure)|||C0041618|SNOMEDCT|||

US|Ultrasound scan (procedure)|||C0041618|SNOMEDCT|||

US|United States of America (geographic location)|||C0041703|SNOMEDCT|||

US|Usher syndrome|C0271097|||||1|0.0011|

US|short unique;unique short|||||1|0.0078|

US|sonographic|||||1|0.0055|

US|ultrasonic|C0220934;C1456803|||C0220934;C1456803|MSH;MTH|1|0.0062|1

US|ultrasonic diagnosis|C0080351;C0175676|||C0175676|MSH;MTH|||

US|ultrasonograph|||||1

US|ultrasonographic|||||1|0.0502|

US|ultrasonographically|||||1|0.0032|

US|ultrasound examination|C0948501|||||1|0.0021|

US|ultrasound imaging/scanning|||C0041618|CSP|||

US|ultrasounded;ultrasounding|||C0041618|CHV|||

US|unconditioned stimulus|C0234403|||C0234403|AOD;CHV;MTH;SNOMEDCT|1|0.0703|1

US|undetermined significance|C1272585|||C1272585|CHV|||

US|upper segment|C0442063|||||1  
US|urinary sugar|C0017979|||||1  
US|urine specimen|C0444180|||||1  
US|us (qualifier value)|||C0439224|SNOMEDCT|||  
US|use of ultrasonography|C0175676|||C0175676|MTH|||  
UTI|A1M;AMBP;AMBP gene;EDC1;HI30;ITILC;inter-alpha-trypsin inhibitor light chain;trypstatin;uristatin;uronic-acid-rich protein|C1412376|||C1412376|HUGO;MTH;OMIM|||  
UTI|ALPHA-1 MICROGLOBULIN;BIKUNIN;bikunin;PROTEIN HC;protein HC|C0051266;C1412376|||C1412376|HUGO;OMIM|||  
UTI|ALPHA-1 MICROGLOBULIN/BIKUNIN PRECURSOR;alpha-1-microglobulin/bikunin precursor|||C1412376|HUGO;OMIM|||  
UTI|COMPLEX-FORMING GLYCOPROTEIN HETEROGENEOUS IN CHARGE;complex-forming glycoprotein heterogeneous in charge|||C1412376|HUGO;OMIM|||  
UTI|HCP|C2985545|||C1412376|HUGO;OMIM|||  
UTI|IATIL|C1412376;C1867668|||C1412376|HUGO|||  
UTI|INFECTION URINARY TRACT;INFECTION, URINARY TRACT;Infection of urinary tract;Infection, Urinary Tract;Infections, Urinary Tract;TRACT, INFECTION OF URINARY;Tract Infection, Urinary;Tract Infections, Urinary;URINARY TRACT INFECTION;Urinary Tract Infection;Urinary Tract Infections;Urinary tract infection;Urinary tract infection (& [NOS]);Urinary tract infection NOS;Urinary tract infection, NOS;Urinary tract infections;urinary tract infection;urinary tract infections;Infection - urinary NOS;Urinary infection NOS;urinary infection;UTI - Urinary tract infection;urinary tract infection (UTI);Urinary tract infection, site not specified;Urinary tract infection, site not specified NOS;Urinary tract infection; site not specified;Urinary tract infectious disease;Urinary tract infectious disease,  
NOS|C0042029|1|1|C0042029|CCS;CHV;COSTAR;CSP;CST;DXP;ICD9CM;LCH;MEDLINEPLUS;MSH;MTH;NCI;NDFRT;OMIM;SNOMEDCT|1|0.9204|1  
UTI|URINARY TRACT INFECT|||C0042029|MSH|||  
UTI|UTI;uti;utis|C0042029;C1412376|||C0042029;C1412376|CHV;DXP;HUGO;MEDLINEPLUS;RAM|||  
UTI|Urin tract infection NOS|||C0042029|ICD9CM|||  
UTI|Urinary Tract Infections [Disease/Finding]|||C0042029|NDFRT|||  
UTI|Urinary infection NOS (disorder)|||C0042029|SNOMEDCT|||  
UTI|Urinary tract infection (& [NOS]) (disorder)|||C0042029|SNOMEDCT|||  
UTI|Urinary tract infection, site not specified NOS (disorder)|||C0042029|SNOMEDCT|||  
UTI|Urinary tract infectious disease (disorder)|||C0042029|SNOMEDCT|||  
UTI|growth-inhibiting protein 19|||C1412376|HUGO|||  
UTI|ulinastatin;urinary trypsin inhibitor|C0077906|||C0077906|MSH|1|0.0733|1  
UTI|urinary tract|C0042027;C1508753|||||1|0.0063|  
VAC|ACO|||C0054889|NCI;PDQ|||  
VAC|CAV|||C0054889|PDQ|||  
VAC|CAV chemotherapy protocol;CAV protocol;VADRC;cyclophosphamide/doxorubicin/vincristine protocol|C0054889|||C0054889|CHV;MSH;MTH;NCI;PDQ|||  
VAC|CDV|||C0054889|NCI;PDQ|||  
VAC|CHO|||C0054889|NCI;PDQ|||  
VAC|CTX/DACT/VBL|||C0280063|NCI;PDQ|||  
VAC|CTX/DACT/VCR|||C0077964|NCI;PDQ|||  
VAC|CTX/DOX/VBL|||C0280062|NCI;PDQ|||  
VAC|CTX/DOX/VCR|||C0054889|NCI;PDQ|||  
VAC|CVA;VA-C|C0038454;C0054889|||C0054889|NCI;PDQ|||  
VAC|Cyclophosphamide/Dactinomycin/Vinblastine;cyclophosphamide/dactinomycin/vinblastine|||C0280063|NCI;PDQ|||

VAC|Cyclophosphamide/Dactinomycin/Vincristine;cyclophosphamide/dactinomycin/vincristine|||C0077964|NCI;PDQ|||
  
VAC|Cyclophosphamide/Doxorubicin/Vinblastine;cyclophosphamide/doxorubicin/vinblastine|||C0280062|NCI;PDQ|||
  
VAC|Cyclophosphamide/Doxorubicin/Vincristine;cyclophosphamide/doxorubicin/vincristine|||C0054889|NCI;PDQ|||
  
VAC|OCA|C1015366|||C0054889|NCI;PDQ|||
  
VAC|VAC|||C0054889;C0077964;C0280062;C0280063|NCI;PDQ|||
  
VAC|VAC (CTX/DACT/VCR)|||C0077964|NCI;PDQ|||
  
VAC|VAC protocol;cyclophosphamide/dactinomycin/vincristine protocol|C0077964|||C0077964|MSH;MTH|||
  
VAC|cyclophosphamide/dactinomycin/vinblastine protocol|||C0280063|MTH|||
  
VAC|cyclophosphamide/doxorubicin/vinblastine protocol|||C0280062|MTH|||
  
VAC|vaccine|C0042210;C1552558|||1|
  
VAC|vaccinia virus|C0042216|||1|0.3559|
  
VAC|vacuum|C0042221|||1|
  
VAC|vacuum-assisted closure|C1956080|1|1.000||1|0.5593|1
  
VAC|ventriculoarterial connection|||1|
  
VAC|ventriculoatrial condition|||1|
  
VAC|ventriculoatrial conduction|||1|0.0847|1
  
VAD|DM/DOX/VCR|||C0077973|NCI;PDQ|||
  
VAD|Dexamethasone/Doxorubicin/Vincristine;dexamethasone/doxorubicin/vincristine|||C0077973|NCI;PDQ|||
  
VAD|VAD;VAD I protocol|C0077973|||C0077973|MSH;NCI;PDQ|||
  
VAD|Vibroacoustic disease|||1|0.049|
  
VAD|vascular access device|C0184269|1|0.026|C0184269|CHV|||1
  
VAD|vascular access dressing|||1|
  
VAD|vascular atherosclerotic disease|||1|0.0232|
  
VAD|vascular dementia|C0011269|||C0011269|CHV;ICD9CM;MSH;NCI;NDFRT;SNOMEDCT|||1
  
VAD|venous access device|||1|
  
VAD|ventricular assist device|C0179926|1|0.174|C0179926|CHV;SNOMEDCT|1|0.5747|1
  
VAD|vertebral artery dissection|C0338586|||C0338586|CHV;MSH;NDFRT;SNOMEDCT|1|0.0361|1
  
VAD|vincristine adriamycin and dexamethasone;vincristine-Adriamycin-dexamethasone||1|0.792||1|0.0284|
  
VAD|virus-adjusting diluent|||1|
  
VAD|vitamin A deficiency|C0042842|||1|0.1624|1
  
VAD|vitamin A-deficient|||1|0.1263|
  
VATS|Surgeries, Video-Assisted Thoracic;Surgery, Thoracic, Video-Assisted;Surgery, Video-Assisted Thoracic;Thoracic Surgeries, Video-Assisted;Thoracic Surgery, Video Assisted;Thoracic Surgery, Video-Assisted;Video Assisted Thoracic Surgery;Video-Assisted Thoracic Surgeries;Video-Assisted Thoracic Surgery;Video-assisted Thoracic Surgery;Video-assisted thoracic surgery;video assisted thoracic surgery;video-assisted thoracic surgery;VATS;vats;VATs;video-assisted thoracic surgery (VATS)|C0752151|1|1|C0752151|CHV;MSH;NCI|1|0.4494|1
  
VATS|Surgeries, Video-Assisted Thoracoscopic;Surgery, Video-Assisted Thoracoscopic;Thoracoscopic Surgeries, Video-Assisted;Thoracoscopic Surgery, Video-Assisted;Video Assisted Thoracoscopic Surgeries;Video-Assisted Thoracoscopic Surgery;video-assisted thoracoscopic surgery|||C0752151|MSH|1|0.4189|1
  
VATS|variable antigen types|||1|0.0417|
  
VATS|variable antigen, surface|||1|
  
VATS|video-assisted thoracic surgical|||1|0.0241|
  
VATS|video-assisted thoracoscopic|||1|0.0225|
  
VATS|video-assisted thoracoscopic surgical|||1|0.0128|
  
VATS|video-assisted thoracoscopy|||1|0.0305|1

VATS|video-assisted transthoracic surgery|||||||1  
VBAC|VBAC;Vaginal Birth After Cesarean;Vaginal Birth after Cesarean;Vaginal Birth after Cesareans;Vaginal Births after Cesarean;Vaginal birth after cesarean;vaginal birth after Caesarean;vaginal birth after caesarean;vaginal birth after cesarean;vaginal births after cesarean|C0080301|1|1|C0080301|CHV;COSTAR;MSH;NCI|1|0.6154|1  
VBAC|vaginal birth after cesarean delivery||||||1|0.1319|  
VBAC|vaginal birth after cesarean section||||||1|0.2527|  
VBG|Veronal-buffered gelatin|||||||1  
VBG|Vertical banded gastroplasty;vertical banded gastroplasty|C0729258|1|0.598|||1|1|1  
VBG|vagotomy and Billroth gastroenterostomy|||||||1  
VBG|vascularized bone graft|||||||1  
VBG|venoaortic coronary artery bypass graft|||||||1  
VBG|venous blood gas||1|0.402|||||1  
VBG|venous bypass graft|||||||1  
VCUG|voiding cysto-urethrography;voiding cystourethrography||||||1|0.7867|  
VCUG|voiding cystourethrogram|C0203123|1|1.000||||1|0.2133|  
VDRL|VDRL;VDRL - Venereal diseases research laboratory test;Venereal Disease Research Laboratory (VDRL) test;venereal disease research laboratory (VDRL) test;VDRL test;VDRL test, NOS;vdr1 test|C0201406|||C0201406|CHV;LNC;MTH;SNOMEDCT|||  
VDRL|VDRL test (procedure)|||C0201406|SNOMEDCT|||  
VDRL|Venereal Disease Research Laboratory;venereal disease research laboratory|C0042430|1|1|C0042430|MTH|1|0.9355|1  
VDRL|Venereal Disease Research Laboratory (VDRL) test (procedure)|||C0201406|SNOMEDCT|||  
VDRL|Venereal Disease Research Laboratory test;Venereal diseases research laboratory test|||C0201406|SNOMEDCT|1|0.0645|  
VDRL|Venereal diseases research laboratory test (procedure)|||C0201406|SNOMEDCT|||  
VK|V potassium||1|1.000|||||  
VK|vervet kidney|||||||1  
VK|vitamin K|C0042878;C2936884|||||1|1|  
VLDL|Lipoprotein.pre-beta;Pre beta Lipoproteins;Pre-beta lipoprotein;Pre-beta-Lipoproteins;pre-beta Lipoprotein;Lipoproteins, VLDL;VLDL Lipoproteins;Lipoproteins, Very-Low-Density;Very Low Density Lipoproteins;Very low density lipoprotein;Very-Low-Density Lipoproteins;very low density lipoprotein;very low density lipoproteins;very-low-density lipoprotein;very-low-density lipoproteins;Prebeta Lipoproteins;Prebeta-Lipoproteins;VLDL - Very low density lipoprotein;very low density lipoprotein (VLDL)|C0023825|1|1|C0023825;C1325416|AOD;CHV;CSP;GO;LNC;MSH;MTH;NDFRT;SNOMEDCT|1|0.0693|1  
VLDL|Lipoproteins, VLDL [Chemical/Ingredient]||||C0023825|NDFRT|||  
VLDL|Serum VLDL Cholesterol Measurement;Serum VLDL cholesterol measurement;Serum VLDL cholesterol level;VLDL;vldl|C0428461|||C0023825;C0428461;C1325416|AOD;CHV;CSP;GO;MTH;NCI;SNO MEDCT|||  
VLDL|Serum VLDL cholesterol measurement (procedure)|||C0428461|SNOMEDCT|||  
VLDL|VLDL Cholesterol|C0023826;C0428461|||C0428461|NCI|||  
VLDL|Very low density lipoprotein (substance)|||C0023825|SNOMEDCT|||  
VLDL|lipoprotein cholesterol|C0065055|||||1|0.0037|  
VLDL|low density||||||1|0.0436|  
VLDL|low density lipoprotein|C0023823|||||1|0.8731|  
VLDL|very-low-density||||||1|0.0104|  
VLDL|very-low-density lipoprotein activity|C1325416|||C1325416|MTH|||  
VP|ADH||||C0138318;C1706109|NCI|||

VP|ARVP|||C0138318;C1706109|NCI|||  
 VP|AVP|||C0138318;C1706109|NCI|||  
 VP|AVP wt Allele|C1706109||C1706109|MTH;NCI|||  
 VP|AVP-NPII;AVRP|C0138318;C1706109||C0138318;C1706109|NCI|||  
 VP|Arginine Vasopressin (Neurophysin II, Antidiuretic Hormone, Diabetes Insipidus, Neurohypophyseal) wt Allele|||C1706109|NCI|||  
 VP|Arginine Vasopressin-Neurophysin II Preproprotein;Prepro-Arginine-Vasopressin-Neurophysin II;Vasopressin-Neurophysin II-Copeptin|C0138318||C0138318|MTH;NCI|||  
 VP|Arginine-vasopressin|C0003779;C1527128|||1|0.006|  
 VP|CBDCA/VCR|||C0280102|NCI;PDQ|||  
 VP|CDDP and VBL chemotherapy protocol|||C0280544|CHV|||  
 VP|CDDP/DAVA|||C0280545|NCI;PDQ|||  
 VP|CDDP/VBL|||C0280544|NCI;PDQ|||  
 VP|Carboplatin/Vincristine;carboplatin/vincristine|||C0280102|NCI;PDQ|||  
 VP|Cisplatin/Vinblastine;cisplatin/vinblastine|||C0280544|NCI;PDQ|||  
 VP|Cisplatin/Vindesine;cisplatin/vindesine|||C0280545|NCI;PDQ|||  
 VP|Dean-Barnes syndrome;Deficiencies, Protoporphyrinogen Oxidase;PROTOPORPHYRINOGEN OXIDASE DEFICIENCY;Protoporphyrinogen Oxidase Deficiency;Protoporphyrinogen oxidase deficiency;Mixed porphyria;PORPHYRIA CUTANEA TARDA HEREDITARIA;PORPHYRIA VARIEGATA;Porphyria variegata;porphyria variegata;PORPHYRIA, MIXED HEPATIC;PORPHYRIA, SOUTH AFRICAN GENETIC;South African genetic porphyria;PORPHYRIA, VARIEGATE;Porphyria Variegata;Porphyria Variegates;Porphyria, Variegata;VARIEGATE PORPHYRIA;Variegata Porphyria;Variegata porphyria;Variegata, Porphyria;Variegates, Porphyria;porphyria variegata;porphyria variegated;variegata porphyria;PPOX DEFICIENCY;Protocoproporphyrinemia;South African porphyria;VP - Variegata porphyria|C0162532||C0162532|AOD;CHV;DXP;MSH;MTH;MTHICD9;NCI;NDFRT;OMIM;SNOMEDCT|1|0.0312|1  
 VP|Nuclei ventrales posteriores;Nucleus, Ventral Posterior;Posterior Nucleus, Ventral;Ventral Posterior Nucleus;Ventral posterior nucleus;ventral posterior nucleus;Structure of ventral posterior nucleus of thalamus;Ventral Posterior Thalamic Nucleus;Ventral posterior thalamic nucleus;Ventrobasal complex;ventrobasal complex;Ventrobasal nucleus|C0228336||C0228336|CHV;FMA;MSH;MTH;SNOMEDCT|||  
 VP|Nucleus ventralis posterior|||C0228336|FMA;SNOMEDCT|||  
 VP|Nucleus ventralis posterior (body structure)|||C0228336|SNOMEDCT|||  
 VP|PRDL/VCR|||C0078413|NCI;PDQ|||  
 VP|PROTOPORPHYRINOGEN OXIDASE DEFIC|||C0162532|MSH|||  
 VP|PVe;V-DDP;cisplatin/vinblastine protocol|C0280544||C0280544|MTH;NCI;PDQ|||  
 VP|Porphyria, Variegata [Disease/Finding]|||C0162532|NDFRT|||  
 VP|Prednisolone/Vincristine;prednisolone/vincristine|||C0078413|NCI;PDQ|||  
 VP|Protoporphyrinogen oxidase deficiency (disorder)|||C0162532|SNOMEDCT|||  
 VP|Structure of ventral posterior nucleus of thalamus (body structure)|||C0228336|SNOMEDCT|||  
 VP|VP;{VP};Viral Particle  
 Unit|C1883540||C0078413;C0138318;C0162532;C0228336;C0280102;C0280544;C0280545;C1706109;C1883540;C2247213|FMA;GO;MTH;NCI;OMIM;PDQ|||  
 VP|VP protocol;prednisolone/vincristine protocol|C0078413||C0078413|MSH;MTH|||  
 VP|Variegata porphyria (disorder)|||C0162532|SNOMEDCT|||  
 VP|VeP|||C0280544|PDQ|||  
 VP|Ventral posterior nucleus of thalamus|C0228336;C1284633||C0228336|SNOMEDCT|||  
 VP|Vind-Plat;cisplatin/vindesine protocol (CDDP/DAVA)|C0280545||C0280545|MTH;NCI;PDQ|||  
 VP|Viral Particle;Viral Particles;viral particles|C0042760;C1883540||C1883540|NCI|1|0.0042|

VP|Voges-Proskauer|||||1  
 VP|carboplatin/vincristine protocol||||C0280102|MTH|||  
 VP|cisplatin and vincristine chemotherapy protocol||||C0280544|CHV|||  
 VP|correction for the residual plasma volume|||||1|0.003|  
 VP|etoposide|C0015133|||||1|0.006|  
 VP|flow propagation velocity|||||1|0.0126|  
 VP|hybrid peroxidase activity; polyvalent peroxidase activity; versatile peroxidase activity|C2247213|||C2247213|GO;MTH|||  
 VP|plasma volume|C0032127|||||1  
 VP|potential|C0035647|||||1|0.0072|  
 VP|principal sensory trigeminal nucleus|C0228701|||||1|0.0042|  
 VP|proteins|C0033684|||||1|0.0054|  
 VP|reactive-black-5:hydrogen-peroxide oxidoreductase activity|||C2247213|GO|||  
 VP|vagal paraganglioma|C0474819|||||1  
 VP|vapor pressure|C0563290|||C0563290|AOD;MSH;SNOMEDCT|||1  
 VP|variably positive|||||1  
 VP|vascular parkinsonism|C0393568|||||1|0.0162|  
 VP|vascular permeability|C0162337|||C0162337|CHV;MSH;SNOMEDCT|1|0.0192|1  
 VP|vasopressin|C0003779;C0042413;C1705480|||C0003779;C0042413;C0201849;C1705480|AOD;CHV;CSP;FMA;LCH;LNC;MSH;MTH;MTHSPL;NCI;NDFRT;PDQ;SNOMEDCT;USPMG;UWDA;VANDF|1|0.5357|1  
 VP|velopharyngeal|||||1|0.0144|1  
 VP|venipuncture|C0190979;C0600406;C1548758|||||1  
 VP|venous plethysmograph|||||1  
 VP|venous pressure|C0042486|||C0042486|CHV;LCH;MSH;SNOMEDCT|1|0.0132|1  
 VP|ventral|C1704448|||||1|0.0066|  
 VP|ventral pallidum|C2328531|||||1|0.0414|  
 VP|ventral posterior|||||1|0.0036|  
 VP|ventral prostate|||||1|0.0498|  
 VP|ventralis posterior|||||1|0.003|  
 VP|ventricle to peritoneal cavity|||||1  
 VP|ventricular pacing|||||1|0.0156|1  
 VP|ventricular pericardium|||||1  
 VP|ventricular peritoneal||1|1.000||||1  
 VP|ventricular premature|||||1  
 VP|ventriculo-peritoneal;ventriculoperitoneal|||||1|0.1434|  
 VP|ventroposterior|||||1|0.009|1  
 VP|ventroposterior nucleus|||||1|0.006|  
 VP|verapamil|C0042523|||||1|0.033|  
 VP|vertex potential|||||1  
 VP|viral protein;virus protein|C0042736|||C0042736|NCI|1|0.0042|1  
 VP|visual perception|C0042789;C0042830|||||1  
 VP|voiding pressure|||||1  
 VP|volume plethysmograph|C0492284|||||1  
 VP|volume-pressure|||||1  
 VP|volumetric lung depth|||||1  
 VP|vulnerable period|||||1|0.006|1  
 VQ|US Virgin Islands;US Virgin island;US Virgin islands|||C0042752|AOD;SNOMEDCT|||  
 VQ|US Virgin island (geographic location)|||C0042752|SNOMEDCT|||  
 VQ|United States Virgin Islands;United States Virgin island;Virgin Islands of the United States;VIR;VIRGIN ISLANDS;Virgin Islands;VIRGIN ISLANDS, U.S.;Virgin Islands, U.S.|C0042752|||C0042752|AOD;LCH;MSH;MTH;NCI;SNOMEDCT|||  
 VQ|VI|C0445379;C1706398|||C0042752|NCI|||  
 VQ|VQ|||C0042752|NCI|||  
 VQ|vector quantization|||||1|0.4545|  
 VQ|ventilation perfusion;ventilation-perfusion||1|1|||1|0.5455|

VQ|voice quality|C0042943|||C0042943|CHV;MSH;MTH|||1  
VRE|VRE;vre;Vancomycin Resistant Enterococcus;Vancomycin resistant enterococcus;vancomycin-resistant Enterococcus;vancomycin-resistant enterococci;vancomycin-resistant enterococcus;vancomycin resistant enterococcus (VRE)|C1265175|1|1|C1265175|CHV;NCI;SNOMEDCT|1|0.9155|1  
VRE|Vancomycin Resistant Enterococcus (organism);Vancomycin resistant enterococcus (organism)|||C1265175|SNOMEDCT|||  
VRE|vancomycin-resistant Enterococcus faecium|||1|0.0533|  
VRE|vancomycin-resistant enterococcal|||1|0.0313|  
VRE|vision right eye|||1|  
VSD|DEFECT INTERVENTRICULAR SEPTUM;Defect, Intraventricular Septal;Defects, Intraventricular Septal;Intraventricular Septal Defect;Intraventricular Septal Defects;Septal Defect, Intraventricular;Septal Defects, Intraventricular;Defect, Ventricular Septal;Septal Defect, Ventricular;Septal Defects, Ventricular;VENTRICULAR SEPTAL DEFECT;Ventricular Septal Defect;Ventricular Septal Defects;Ventricular septal defect;Ventricular septal defect NOS;Ventricular septal defects;ventricular septal defect;ventricular septal defects;Heart Septal Defects, Ventricular;Interventricular septal defect;interventricular septal defect;SEPTUM INTERVENTRICULAR PATENT;VSD;vsd;VSD - Ventricular septal defect;Ventricular Septal Defect (VSD);Ventricular septal defect (VSD);Ventricular septal abnormality|C0018818|1|1|C0018818|AOD;CCS;CHV;COSTAR;CST;DXP;ICD9CM;MSH;MTH;MTHI CD9;NCI;NDFRT;OMIM;SNOMEDCT|1|0.9446|1  
VSD|Heart Septal Defects, Ventricular [Disease/Finding]|||C0018818|NDFRT|||  
VSD|Interventricular septal defect (disorder)|||C0018818|SNOMEDCT|||  
VSD|Septal def.-ventricular;Ventricular septal def.|||C0018818|SNOMEDCT|||  
VSD|Vaccine Safety Datalink|||1|0.0123|1  
VSD|Ventricular sept defect|||C0018818|ICD9CM|||  
VSD|Ventricular septal abnormality (disorder)|||C0018818|SNOMEDCT|||  
VSD|Ventricular septal defect (disorder);Ventricular septal defect NOS (disorder)|||C0018818|SNOMEDCT|||  
VSD|Ventricular septal defect, unspecified|||C0018818|SNOMEDCT|||  
VSD|Ventricular septal defect, unspecified (disorder)|||C0018818|SNOMEDCT|||  
VSD|vascular surface density|||1|0.0164|  
VSD|vesical external sphincter dyssynergia|||1|  
VSD|vesicular stomatitis virus|C0042587;C0206548;C1623048|||1|  
VSD|virtually safe dose|||1|0.0175|1  
VSD|voltage-sensitive dye|||1|0.0092|  
VT|Holy See|||C0042427|NCI|||  
VT|Holy See (Vatican City State)|||C0042427|NCI|||  
VT|Lung tidal volume;lungs tidal volume;TV - Tidal volume;Tidal Volume;Tidal Volumes;Tidal volume;Volume, Tidal;Volumes, Tidal;tidal volume;tidal volumes;VT;vt;vts;VT - Tidal volume;tidal volume (vt);respiratory airway volume|C0040210|1|0.002|C0040210;C0042427;C0042514;C0042537|AOD;CHV;CSP;DXP;LNC;MSH;MTH;NCI;SNOMEDCT|1|0.3243|1  
VT|TACHYCARDIA VENTRICULAR;TACHYCARDIA, VENTRICULAR;Tachycardia, Ventricular;Tachycardia, ventricular;Tachycardias, Ventricular;VENTRICULAR TACHYCARDIA;Ventricular Tachycardia;Ventricular Tachycardias;Ventricular tachycardia;Ventricular tachycardia, NOS;ventricular tachycardia;ventricular tachycardia (V-tach)|C0042514;C1963247|1|0.98|C0042514;C1963247|CHV;COSTAR;CST;DXP;MSH;MTH;MTHI CD9;NCI;NDFRT;OMIM;SNOMEDCT|1|0.5322|1  
VT|Tachycardia - ventric.|||C0042514|SNOMEDCT|||  
VT|Tachycardia, Ventricular [Disease/Finding]|||C0042514|NDFRT|||  
VT|Tidal volume (observable entity)|||C0040210|SNOMEDCT|||  
VT|V T;V>T<;t v;v t|C0039461;C0040210|||C0040210|CHV;SNOMEDCT|||  
VT|V<sub>T</sub>|||C0040210|SNOMEDCT|||

VT|VA||||C0042427|NCI|||  
 VT|VAT;VATICAN CITY STATE;Vatican  
 City|C0042427|||C0042427|AOD;LCH;MSH;MTH;NCI;SNOMEDCT|||  
 VT|VENTRICULAR TACHYARRHYTHMIA;Ventricular tachyarrhythmia;ventricular  
 tachyarrhythmia;ventricular tachyarrhythmias;VT - Ventricular tachycardia;v  
 tach|C0042514|||C0042514|CHV;COSTAR;SNOMEDCT|1|0.0135|1  
 VT|Vatican City (geographic location)|||C0042427|SNOMEDCT|||  
 VT|Ventilation tube;ventilation  
 tube|C0850121;C1317862|||C0850121;C1317862|CHV;LNC;MTH;SNOMEDCT|1|0.0029|  
 VT|Ventricular tachyarrhythmia (disorder)|||C0042514|SNOMEDCT|||  
 VT|Ventricular tachycardia (disorder)|||C0042514|SNOMEDCT|||  
 VT|Ventricular techycardia|||C0042514|SNOMEDCT|||  
 VT|Vermont;vermont|C0042537|1|0.002|C0042537|AOD;CHV;LCH;MSH;MTH;NCI;SNOMEDCT|||  
 VT|Vermont (geographic location)|||C0042537|SNOMEDCT|||  
 VT|exposure to the trichothecene vomitoxin|||||1|0.001|  
 VT|insertion of ventilation tubes|||||1|0.0012|  
 VT|tetrazolium violet|C2603970|||||1|  
 VT|total ventilation|||||1|  
 VT|transepithelial potential|||||1|0.0053|  
 VT|transepithelial potential difference|||||1|0.0043|  
 VT|transepithelial voltage|||||1|0.0176|  
 VT|unsustained ventricular tachycardia|||||1|  
 VT|vacuum tube|||||1|  
 VT|vacuum tuberculin|||||1|  
 VT|validation therapy|C0556529|||||1|  
 VT|variable temperature|||||1|  
 VT|vasotocin|C0042418|||||1|0.0111|1  
 VT|venous thromboembolism|C1861172|||||1|0.0027|  
 VT|venous thrombosis|C0042487;C0517555|1|0.002|||1|0.0092|1  
 VT|venous tone|||||1|0.0012|  
 VT|ventilating tubes|||||1|0.0014|  
 VT|ventilatory threshold|||||1|0.035|  
 VT|ventral tegmentum|||||1|0.0019|  
 VT|vero cytotoxin;verocytotoxin;verotoxin|C0148323|||||1|0.0282|1  
 VT|video telemetry|||||1|  
 VT|vitellin|C0042892|||||1|0.0046|  
 VT|vocational training|C0204116|||||1|0.0012|  
 VT|volume transmission|||||1|0.0012|  
 WBC|Blood Cell Count, White;White Blood Cell Count;White blood cell count;white  
 blood cell  
 count|C0023508;C0427512|||C0023508;C0427512|AOD;CHV;MSH;MTH;SNOMEDCT|1|0.1588|  
 WBC|Blood Cell, White;Blood Cells, White;White Blood Cell;White Blood  
 Cells;White blood cell;White blood cell, NOS;White blood cells;blood white  
 cell;blood white cells;bloods cells white;white blood cell;white blood  
 cells|C0023508;C0023516|1|1|C0023508;C0023516|AOD;CHV;FMA;MSH;NCI;SNOMEDCT|1|0.7  
 498|1  
 WBC|Blood Corpuscle, White;Blood Corpuscles, White;Corpuscle, White  
 Blood;Corpuscles, White Blood;White Blood Corpuscle;White Blood Corpuscles;blood  
 corpuscles white;white blood corpuscle;Leucocyte;Leukocyte;Leukocyte,  
 NOS;Leukocytes;leucocyte;leucocytes;leukocyte;leukocytes;Leukocyte (cell);cell  
 leukocyte;Reticuloendothelial System, Leukocytes;WBC (white blood cell);WBC -  
 White blood cell;white blood cell (WBC);White Cell;blood  
 leukocytes;leukocytic|C0023516|||C0023508;C0023516|AOD;CHV;CSP;FMA;HL7V2.5;LNC;M  
 SH;MTH;NCI;SNOMEDCT|1|0.054|  
 WBC|Count, Leukocyte;Counts, Leukocyte;Leukocyte Count;Leukocyte  
 Counts;leukocyte count;Leukocyte Number;Number, Leukocyte;Leukocyte  
 Numbers;Numbers, Leukocyte;WBC - White blood cell count;WBC count;WCC - White

blood cell count;White Blood Cell Count procedure;White blood cell count  
(procedure);white blood cell count procedure;White blood cell count -  
observation;White blood cell  
test|C0023508|||C0023508|AOD;CHV;CSP;MSH;MTH;NCI;SNOMEDCT|||  
WBC|WBC|C0023508;C0023516;C1882326|||C0023508;C0023516|CHV;LNC;MTH;NCI|||  
WBC|White blood cell (cell)|||C0023516|SNOMEDCT|||  
WBC|White blood cell test (procedure)|||C0023508|SNOMEDCT|||  
WBC|weightbearing with crutches|||||||1  
WBC|well-baby clinic|||||||1  
WBC|white blood count||||||1|0.0332|  
WBC|whole-body counter|C0043160||||||1|0.0043|  
XRT|external beam radiation therapy|C1517033|||C1517033|MTH;NCI|||  
XRT|external radiation therapy|C1517033;C1880643|||||||1  
XRT|irradiation|C1282930;C1522449||||||1|0.1185|  
XRT|radiation|C0034519;C0560559;C0851346;C1522449;C1524020;C1524021||||||1|0.1533  
|  
XRT|radiation therapy|C0034619;C1522449|1|1.000|||1|0.3589|
